# Supplementary material for: Photo-induced synthesis of β-sulfonyl imides from carboxylic acids
Source: Royal Society of Chemistry journal article supplement (doi:10.1039/d1cc02559g), 2021-01-01
Supplement: d1cc02559g1.pdf [file d1cc02559g1.pdf]

## Supporting Information

for

# Photo-Induced Synthesis of $\beta$ -Sulfonyl Imides from Carboxylic Acids

Linwei Zeng<sup>a</sup>, Jian Jin<sup>b</sup>, Jixiao He<sup>a</sup>, and Sunliang Cui<sup>\*a</sup>

<sup>a</sup>Institute of Drug Discovery and Design, College of Pharmaceutical Sciences, Zhejiang University, 866 Yuhangtang Road, Hangzhou 310058, China

<sup>b</sup>CAS Key Laboratory of Synthetic Chemistry of Natural Substances, Shanghai Institute of Organic Chemistry, Chinese Academy of Sciences

Email: [slcui@zju.edu.cn](mailto:slcui@zju.edu.cn)

## Content

|                                                       |          |
|-------------------------------------------------------|----------|
| 1. General Information .....                          | S2       |
| 2. Starting Materials .....                           | S3-S4    |
| 3. Reaction Optimization .....                        | S4-S5    |
| 4. Typical Procedure for The Synthesis of 3a.....     | S5-S6    |
| 5. Gram-Scale Reaction .....                          | S6-S7    |
| 6. Procedures for The Synthesis of 5, 6 and 7 .....   | S7-S8    |
| 7. Mechanistic Studies.....                           | S8-S16   |
| 7.1 Radical Scavenging Experiments .....              | S8-S9    |
| 7.2 Step-wise Experiment.....                         | S9       |
| 7.3 Stern–Volmer Quenching Experiments .....          | S9-S11   |
| 7.4 Light On/Off Experiment.....                      | S11      |
| 7.5 Crossover Reaction .....                          | S12      |
| 7.6 Cyclic Voltammograms .....                        | S13      |
| 7.7 UV Sensitizer Experiments .....                   | S13-S14  |
| 7.8 Determination of The Reaction Quantum Yield ..... | S14-S16  |
| 8. Characterization of Products .....                 | S16-S49  |
| 9. X-ray Crystallographic Data.....                   | S49-S51  |
| 10. HPLC Charts.....                                  | S51-S56  |
| 11. Copies of NMR Spectra .....                       | S57-S216 |
| 12. References .....                                  | S217     |

## 1. General Information

Reactions were monitored by thin layer chromatography (TLC) using silicycle pre-coated silica gel plates. Column chromatography was performed over silica gel (200–300 mesh).

Melting points were measured with X-4 micro melting point apparatus.

HRMS were performed on Agilent Technologies 6546-LC/Q-TOF LC/MS apparatus (ESI-TOF).

The *ee* values of chiral compounds were determined by HPLC analysis on a CHIRALPAK AD-H column (Department of Chemistry, Zhejiang University).

<sup>1</sup>H NMR spectra and <sup>13</sup>C NMR spectra were recorded on a *Bruker AV-500* spectrometer (Pharmaceutical Informatics Institute, Zhejiang University) or a WNMRI-400 spectrometer (Department of Chemistry, Zhejiang University) in chloroform-*d* (CDCl<sub>3</sub>, contain internal TMS) or DMSO-*d*<sub>6</sub>. For CDCl<sub>3</sub> as solvent, chemical shifts of <sup>1</sup>H NMR spectra were reported in ppm with the internal TMS signal at 0 ppm as a standard, and chemical shifts of <sup>13</sup>C NMR spectra were reported in ppm with the chloroform signal at 77.16 ppm as a standard.<sup>1</sup> The data is being reported as (s = singlet, d = doublet, t = triplet, q = quartet, quint = quintet, hept = heptet, dd = double doublet, dt = double of triplet, m = multiplet or unresolved, br = broad singlet, coupling constant(s) in Hz, integration).

Photocatalysts were purchased from Jiangsu Sinocompound Catalysts Co., Ltd.

Solvents, such as Ethyl acetate (EA), petroleum ether (PE) were obtained commercially and used without further purification unless otherwise noted. Acetonitrile (MeCN) was purified by distilling after treating with CaH<sub>2</sub>.

## 2. Starting Materials

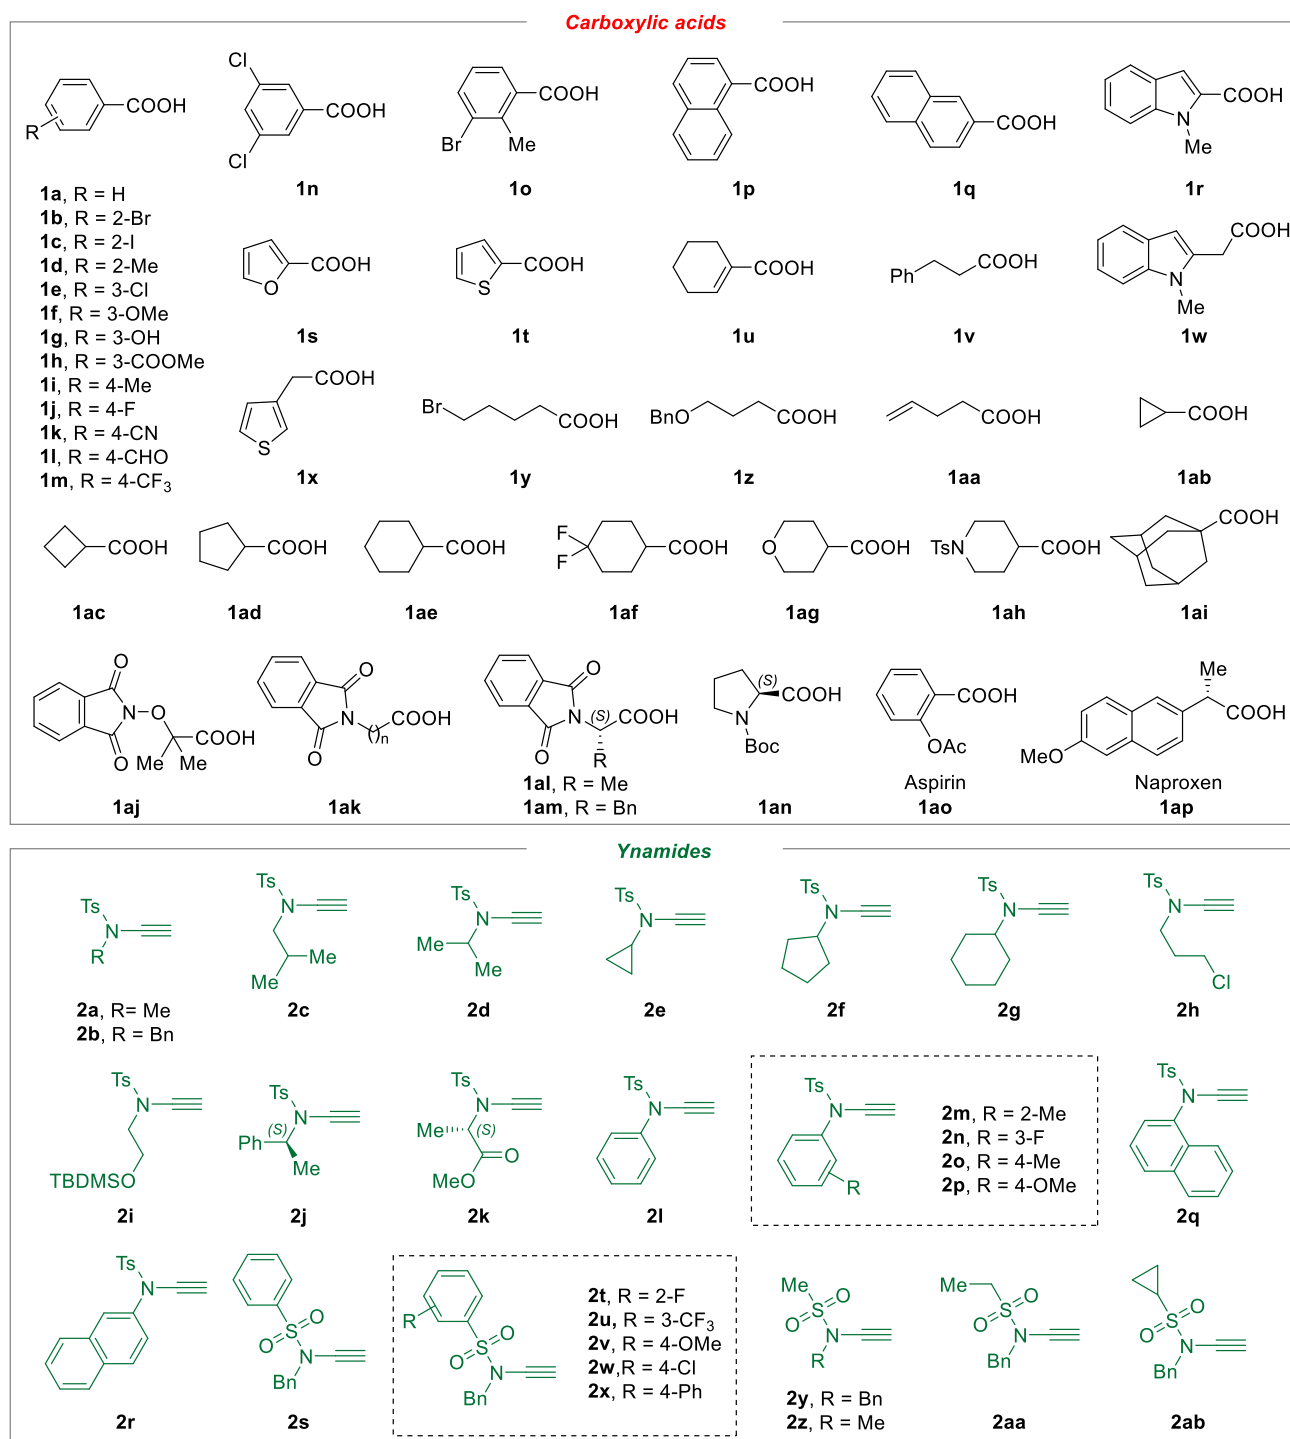

**Fig. S1 Starting carboxylic acids and ynamides.** Chemical structures of starting materials.

All starting carboxylic acids and ynamides are listed in **Fig. S1**. All starting carboxylic acids, except **1aj**, are commercial available. Carboxylic acid **1aj** was prepared according to the reported procedure.<sup>2</sup> Starting ynamides are synthesized according to the reported methods. Ynamides **2a-2g**,

**2i-2j**, **2l-2m**, **2o-2x** were prepared according to the method A,<sup>3</sup> Ynamides **2h**, **2k** and **2n** were prepared according to the method B;<sup>4</sup> and ynamides **2y-2ab** were prepared according to the method C.<sup>5</sup>

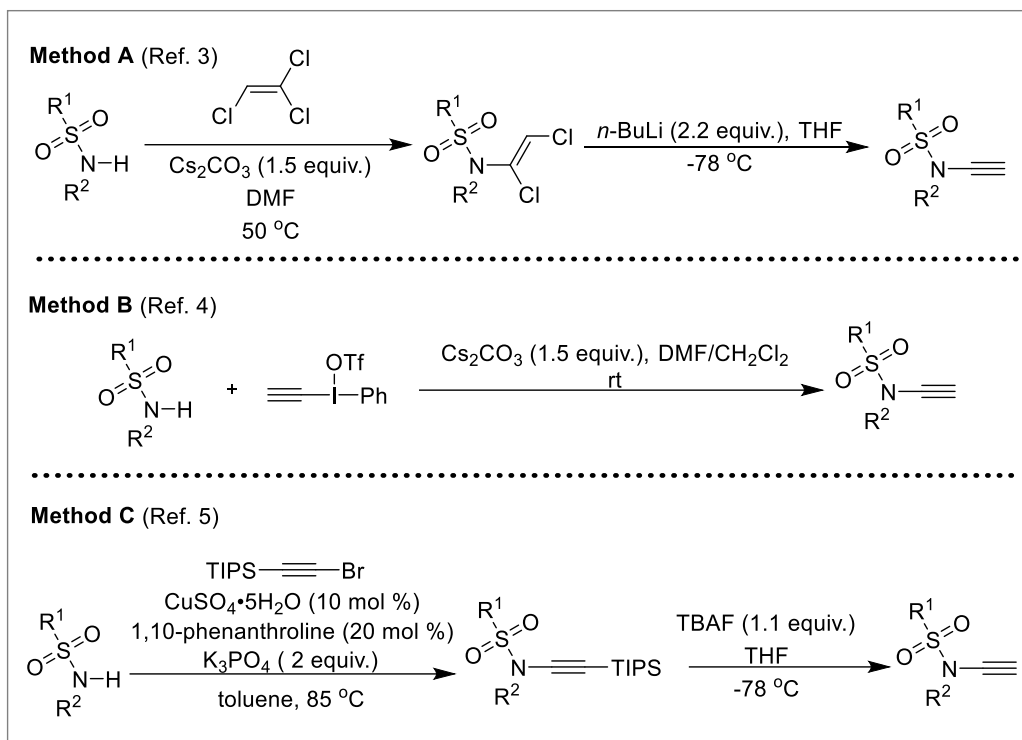

Fig. S2 Synthesis of ynamides. Starting ynamides were prepared according to the reported methods.

### 3. Reaction Optimization

Table S1. Reaction Optimization

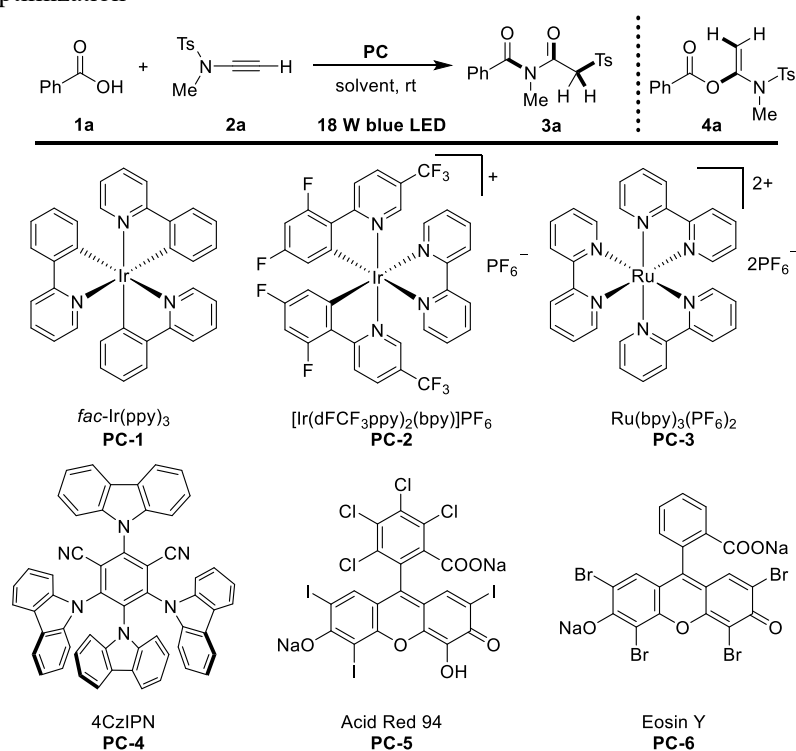

| Entry          | Photocatalyst | Solvent                         | Yield (%) <sup>b</sup> |
|----------------|---------------|---------------------------------|------------------------|
| 1              | PC-1          | MeCN                            | 67                     |
| 2              | PC-2          | MeCN                            | 96                     |
| 3              | PC-3          | MeCN                            | 0 <sup>c</sup>         |
| 4 <sup>d</sup> | PC-4          | MeCN                            | 85                     |
| 5 <sup>d</sup> | PC-5          | MeCN                            | 0                      |
| 6 <sup>d</sup> | PC-6          | MeCN                            | 31                     |
| 5              | PC-2          | CH <sub>2</sub> Cl <sub>2</sub> | 92                     |
| 6              | PC-2          | MeOH                            | 63                     |
| 7              | PC-2          | MeCN:H <sub>2</sub> O = 1:1     | 19                     |
| 8              | none          | MeCN                            | 0 <sup>c</sup>         |
| 9              | PC-2          | MeCN                            | 0 <sup>c,e</sup>       |

<sup>a</sup> Reaction conditions: **1a** (0.2 mmol), **2a** (0.2 mmol), photocatalyst (0.2 mol %), solvent (2 mL), rt, 3 h, argon; 18 W blue LEDs is used. <sup>b</sup> Yield refers to isolated product. <sup>c</sup> Intermediate **4a** was observed. <sup>d</sup> Photocatalyst (2 mol %) is used. <sup>e</sup> Without light irradiation.

#### 4. Typical Procedure for The Synthesis of **3a**

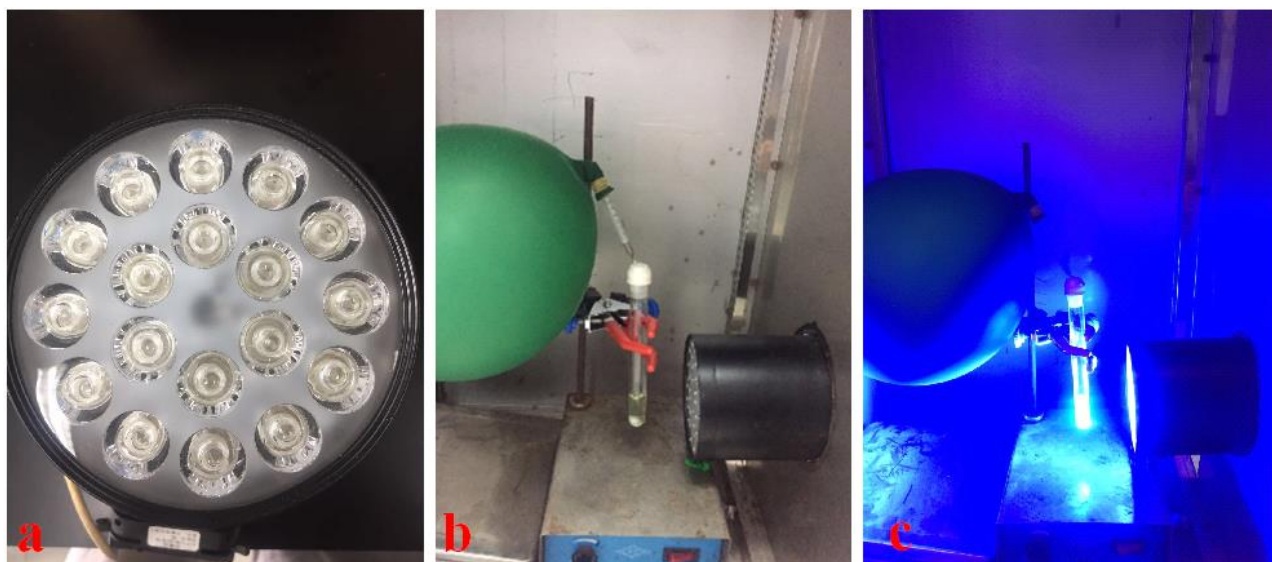

**Fig. S3** General reaction apparatus. **a.** 18 W blue LEDs. **b.** Dissolving carboxylic acids (0.2 mmol), ynamides (0.2 mmol) and Ir(dF(CF<sub>3</sub>)PPy)<sub>2</sub>(bPy)(PF<sub>6</sub>) (0.2 mol %) in 2 mL anhydrous MeCN under argon atmosphere. **c.** Irradiating the reaction by blue LED at rt.

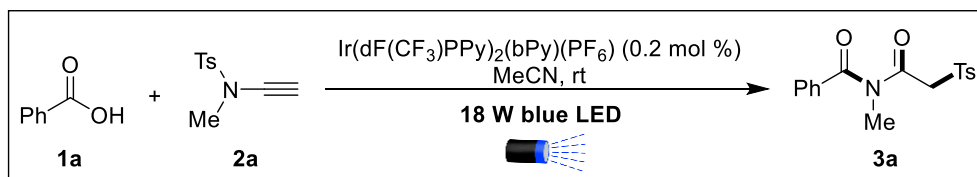

An oven-dried culture tube equipped with a magnetic stirrer bar was charged with benzoic acid **1a** (25 mg, 0.2 mmol), ynamide **2a** (42 mg, 0.2 mmol) and Ir(dF(CF<sub>3</sub>)PPy)<sub>2</sub>(bPy)(PF<sub>6</sub>) (0.4 mg, 0.2 mol %), and then purged with argon three times. Anhydrous MeCN (2 mL) was added as solvent and the reaction was stirred at room temperature for 5 h under the irradiation of 18 W Blue LED lamp. The reaction was concentrated under vacuum to obtain the residue, which was further purified by silica gel column chromatography eluting by PE/ EA (3/1, v/v) to give **3a** (63.5 mg, 96% yield) as a white solid.

## 5. Gram-Scale Reaction

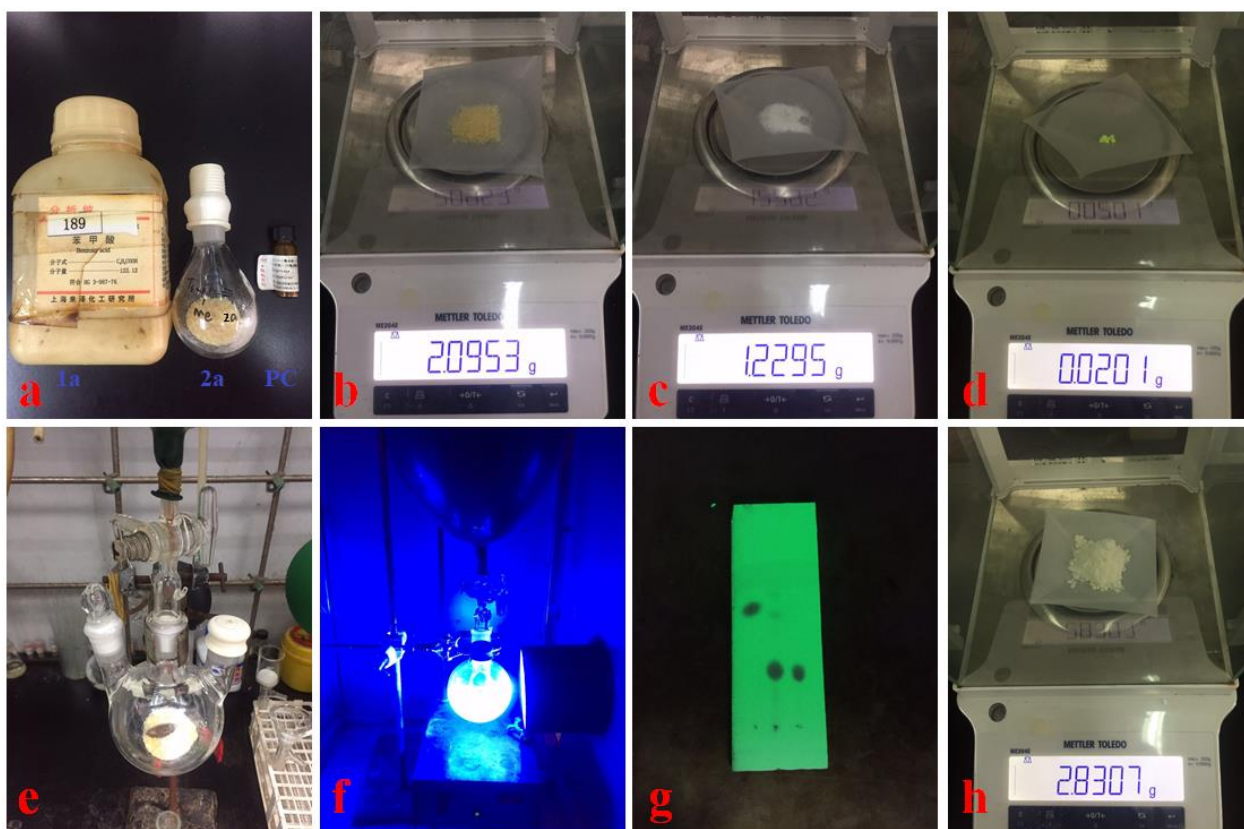

**Fig. S4 Gram-scale reaction.** **a.** Starting materials and photocatalyst. **b.** 2.09 g of ynamide **2a** was weighed. **c.** 1.22 g of benzoic acid **1a** was weighed. **d.** 20 mg of Ir(dF(CF<sub>3</sub>)PPy)<sub>2</sub>(bPy)(PF<sub>6</sub>) was weighed. **e.** the mixture was under the argon atmosphere and added 100 mL anhydrous MeCN. **f.** The reaction was irradiated by 18 W blue LEDs at rt. **g.** the reaction was analysed by TLC (PE/EA = 3/1, v/v. left: ynamide **2a**; middle: reaction; right: product **3a**). **h.** 2.83 g of product **3a** was isolated.

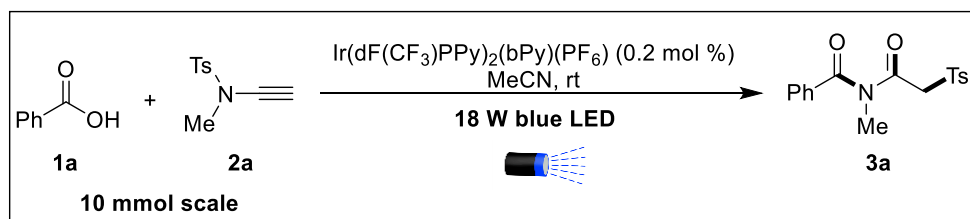

An oven-dried flask equipped with a magnetic stirrer bar was charged with benzoic acid **1a** (1.22 g, 10 mmol), ynamide **2a** (2.09 g, 10 mmol) and  $\text{Ir}(\text{dF}(\text{CF}_3)\text{PPy})_2(\text{bPy})(\text{PF}_6)$  (20 mg, 0.02 mmol), and then purged with argon three times. Anhydrous MeCN (100 mL) was added and the reaction was stirred at room temperature for 5 h under the irradiation of 18 W Blue LED. The reaction was concentrated under vacuum to obtain the residue, which was purified by silica gel column chromatography eluting by PE/ EA (3/1, v/v) to give **3a** (2.83 g, 86% yield) as a white solid.

## 6. Procedures for The Synthesis of 5, 6 and 7

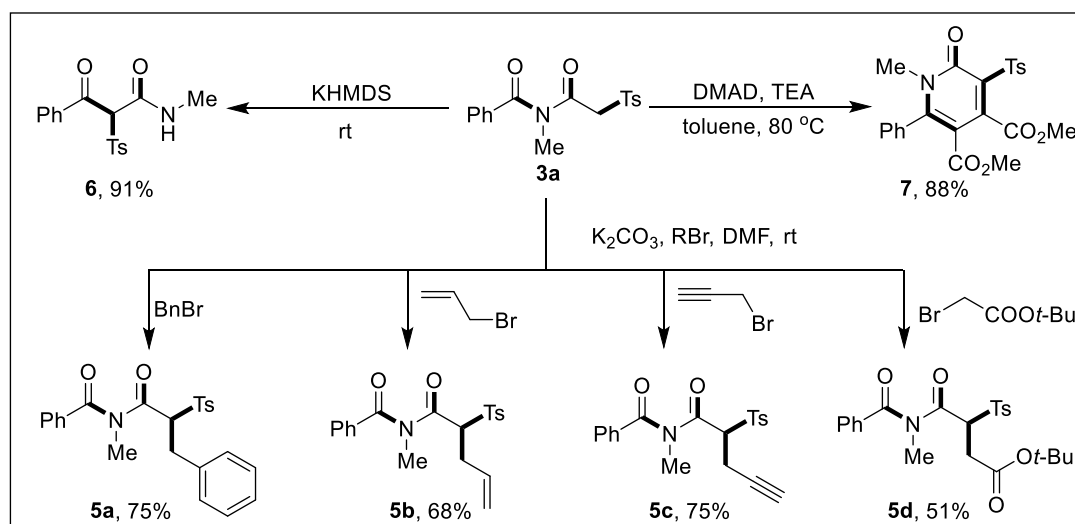

**General procedure for the synthesis 5.** An oven-dried Schlenk tube equipped with a magnetic stirrer bar was charged with **3a** (66 mg, 0.2 mmol) and  $\text{K}_2\text{CO}_3$  (35 mg, 0.25 mmol), then purged with argon three times. Anhydrous DMF (2 mL) was added as solvent. Alkyl bromides (0.3 mmol, 1.5 equiv.) was added and the reaction was stirred at room temperature for 2 h. The reaction was quenched with aqueous  $\text{NH}_4\text{Cl}$  and extracted with EtOAc (3×10 mL). The combined organic layer was washed by brine, dried over anhydrous  $\text{Na}_2\text{SO}_4$ , filtered, and the filtrate was concentrated under vacuum to obtain the residue, which was purified by silica gel column chromatography eluting by PE/ EA (5/1, v/v) to give corresponding **5**.

**Procedure for the synthesis of 6:** An oven-dried Schlenk tube equipped with a magnetic stirrer

bar was charged with **3a** (66 mg, 0.2 mmol), then purged with argon three times. Anhydrous THF (4 mL) was added as solvent. Then KHMDS (0.3 mL, 1 mol/L in THF) was added and the reaction was stirred at room temperature for 1 h. The reaction was quenched with aqueous NH<sub>4</sub>Cl and extracted with EtOAc (3×10 mL). The combined organic layer was washed by brine, dried over anhydrous Na<sub>2</sub>SO<sub>4</sub>, filtered, and the filtrate was concentrated under vacuum to obtain the residue, which was purified by silica gel column chromatography eluting by PE/ EA (1/1, v/v) to give *N*-methyl-3-oxo-3-phenyl-2-tosylpropanamide **6** (60 mg, 91% yield) as a white solid.

**Procedure for the synthesis of 7:** An oven-dried Schlenk tube equipped with a magnetic stirrer bar was charged with **3a** (66 mg, 0.2 mmol), then purged with argon three times. Anhydrous toluene (2 mL), DMAD (32 mg, 0.3 mmol) and TEA (55 μL, 0.4 mmol) were added and the reaction was stirred at 80 °C for 12 h. The reaction was concentrated under vacuum to obtain the residue, which was purified by silica gel column chromatography eluting by PE/ EA (2/1, v/v) to give dimethyl 1-methyl-6-oxo-2-phenyl-5-tosyl-1,6-dihydropyridine-3,4-dicarboxylate **7** (80 mg, 88% yield) as a yellow solid.

## 7. Mechanistic Studies

### 7.1 Radical Scavenging Experiments

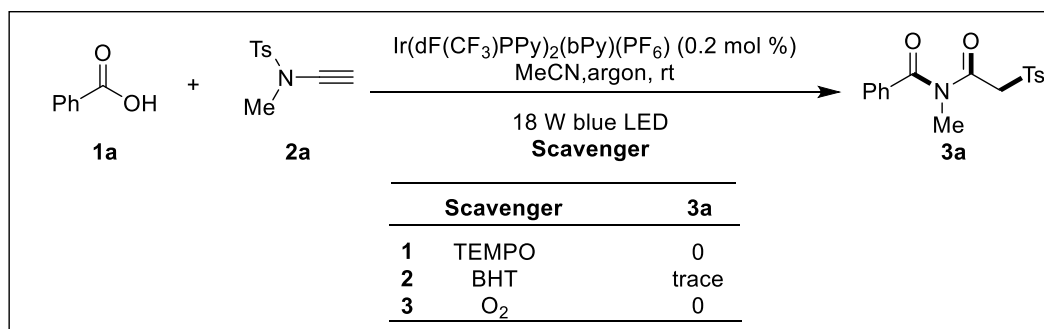

**Experiment 1 and 2:** An oven-dried culture tube equipped with a magnetic stirrer bar was charged with benzoic acid **1a** (25 mg, 0.2 mmol), ynamide **2a** (42 mg, 0.2 mmol), Ir(dF(CF<sub>3</sub>)PPy)<sub>2</sub>(bPy)(PF<sub>6</sub>) (0.4 mg, 0.2 mol %) and radical scavenger (TEMPO or BHT, 1.5 equiv.), and then purged with argon three times. Anhydrous MeCN (2 mL) was added as solvent and the reaction was stirred at room temperature for 5 h under the irradiation of 18 W Blue LED lamp.

**Experiment 3:** An oven-dried culture tube equipped with a magnetic stirrer bar was charged with benzoic acid **1a** (25 mg, 0.2 mmol), ynamide **2a** (42 mg, 0.2 mmol) and Ir(dF(CF<sub>3</sub>)PPy)<sub>2</sub>(bPy)(PF<sub>6</sub>)



(0.4 mg, 0.2 mol %), and then purged with oxygen three times. Anhydrous MeCN (2 mL) was added as solvent and the reaction was stirred at room temperature for 5 h under the irradiation of 18 W Blue LED lamp.

The TLC analysis of these reactions showed that TEMPO, BHT and O<sub>2</sub> could completely suppress the imidation reaction, suggesting a radical intermediate was involved in the process.

## 7.2 Step-wise Experiment

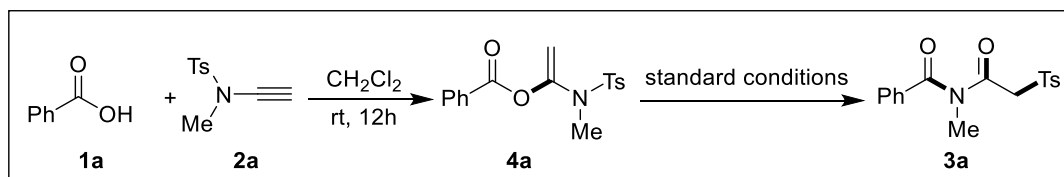

An oven-dried Schlenk tube equipped with a magnetic stirrer bar was charged with benzoic acid **1a** (25 mg, 0.2 mmol), ynamide **2a** (42 mg, 0.2 mmol) and then purged with argon three times. Anhydrous CH<sub>2</sub>Cl<sub>2</sub> (2 mL) was added and the reaction was stirred at room temperature for 12 h. TLC analysis showed the ynamide was consumed completely. The reaction was concentrated to obtain the product **4a** (67 mg, quant.) as a white solid.

The **4a** (67 mg, 0.2 mmol) and Ir(dF(CF<sub>3</sub>)PPy)<sub>2</sub>(bPy)(PF<sub>6</sub>) (0.4 mg, 0.0004 mmol) was dissolved in anhydrous MeCN (2 mL) under argon and then the mixture was stirred under the irradiation of 18 W Blue LED for 5h at room temperature. The reaction was concentrated under vacuum to obtain the residue, which was purified by silica gel column chromatography eluting by PE/ EA (3/1, v/v) to give **3a** (62 mg, 92% yield). The step-wise experiment demonstrates that **4a** is the intermediate of this photo-induced imidation process.

## 7.3 Stern–Volmer Quenching Experiments

Emission intensities were recorded using Hitachi F-2500 fluorescence spectrometer for all experiments. All Ir(dF(CF<sub>3</sub>)PPy)<sub>2</sub>(bPy)(PF<sub>6</sub>) solutions (0.01 mM) were excited at 390 nm and the emission intensity at 485 nm was collected at room temperature (**Fig. S5**). Samples were prepared by rapidly adding solutions of photocatalyst, quencher, and MeCN to obtain a total volume of 1.5 mL under an argon atmosphere. The sample was shaken for 1 min and then the emission of the sample was collected at fluorescence spectrometer immediately. All the experiments are run in three times (**Table S2-S4**). The data show that **4a** could quench the excited state of the photocatalyst, while **1a** and **2a** are

unable to quench this excited state, further verifying that **4a** is the intermediate of this imidation process (**Fig. S6**).

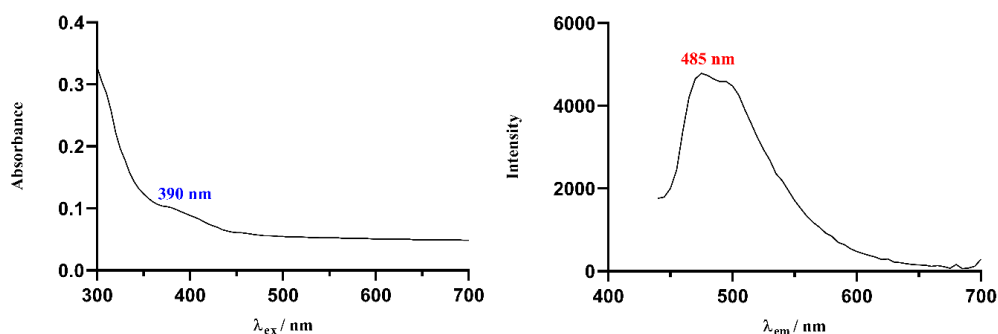

**Fig. S5** Absorbance and emission spectra of Ir(dF(CF<sub>3</sub>)PPy)<sub>2</sub>(bPy)(PF<sub>6</sub>). 0.01Mm concentration in MeCN. **Left:** Absorbance of Ir(dF(CF<sub>3</sub>)PPy)<sub>2</sub>(bPy)(PF<sub>6</sub>). **Right:** Emission spectra of Ir(dF(CF<sub>3</sub>)PPy)<sub>2</sub>(bPy)(PF<sub>6</sub>).

**Table S2.** Stern–Volmer quenching experiment of Ir(dF(CF<sub>3</sub>)PPy)<sub>2</sub>(bPy)(PF<sub>6</sub>) and **4a**

| <b>4a</b> /mM | Emission 1 | Emission 2 | Emission 3 | Average  | I <sub>0</sub> /I |
|---------------|------------|------------|------------|----------|-------------------|
| 0             | 1261       | 1250       | 1241       | 1250.667 | 1.004264          |
| 0.5           | 1236       | 1234       | 1235       | 1235     | 1.017004          |
| 1             | 1179       | 1146       | 1167       | 1164     | 1.079038          |
| 2             | 1150       | 1124       | 1135       | 1136.333 | 1.105309          |
| 4             | 989        | 993        | 989        | 990.3333 | 1.26826           |

**Table S3.** Stern–Volmer quenching experiment of Ir(dF(CF<sub>3</sub>)PPy)<sub>2</sub>(bPy)(PF<sub>6</sub>) and **1a**

| <b>1a</b> /mM | Emission 1 | Emission 2 | Emission 3 | Average  | I <sub>0</sub> /I |
|---------------|------------|------------|------------|----------|-------------------|
| 0             | 1278       | 1273       | 1268       | 1273     | 1                 |
| 0.5           | 1261       | 1266       | 1259       | 1262     | 1.008716          |
| 1             | 1271       | 1268       | 1260       | 1266.333 | 1.005265          |
| 2             | 1258       | 1272       | 1263       | 1264.333 | 1.006855          |
| 4             | 1263       | 1277       | 1261       | 1267     | 1.004736          |

**Table S4.** Stern–Volmer quenching experiment of Ir(dF(CF<sub>3</sub>)PPy)<sub>2</sub>(bPy)(PF<sub>6</sub>) and **2a**

| <b>2a</b> /mM | Emission 1 | Emission 2 | Emission 3 | Average  | I <sub>0</sub> /I |
|---------------|------------|------------|------------|----------|-------------------|
| 0             | 1261       | 1268       | 1271       | 1266.667 | 1                 |
| 0.5           | 1259       | 1263       | 1255       | 1259     | 1.00609           |
| 1             | 1263       | 1266       | 1256       | 1261.667 | 1.003963          |
| 2             | 1243       | 1249       | 1251       | 1247.667 | 1.015229          |
| 4             | 1251       | 1249       | 1249       | 1249.667 | 1.013604          |

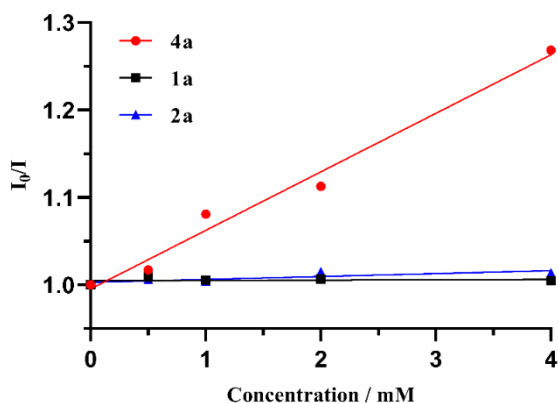

**Fig. S6 Results of Stern–Volmer quenching experiment.** The data show that **4a** could quench the excited state of the photocatalyst, while **1a** and **2a** are unable to quench this excited state.

## 7.4 Light On/Off Experiment

An oven-dried 25 mL culture tube equipped with a magnetic stirrer bar was charged with benzoic acid **1a** (74 mg, 0.6 mmol), ynamide **2a** (126 mg, 0.6 mmol) and Ir(dF(CF<sub>3</sub>)PPy)<sub>2</sub>(bPy)(PF<sub>6</sub>) (2.4 mg, 0.2 mol %), and then purged with argon three times. Anhydrous MeCN (12 mL) was added as solvent. The reaction was performed at room temperature under alternating intervals of light and dark (15 mins). The reaction profile is shown below and the yield of product **3a** was determined by <sup>1</sup>H NMR (taking 1mL samples and adding 0.1 mmol 1,3,5-trioxane was used as an internal standard). This experiment indicates that continuous irradiation of blue light is essential for the reaction (**Fig. S7**).

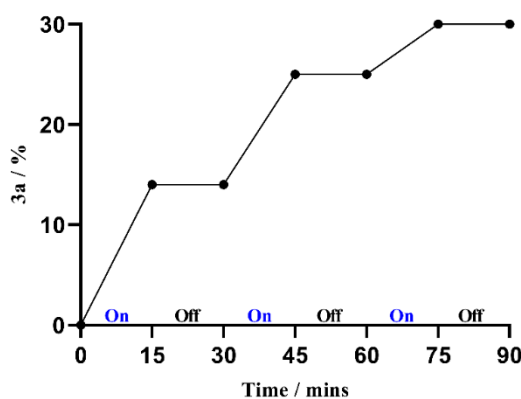

**Fig. S7 Light on/off experiment.** The result shows the imidation process needs continuous irradiation.

## 7.5 Crossover Reaction

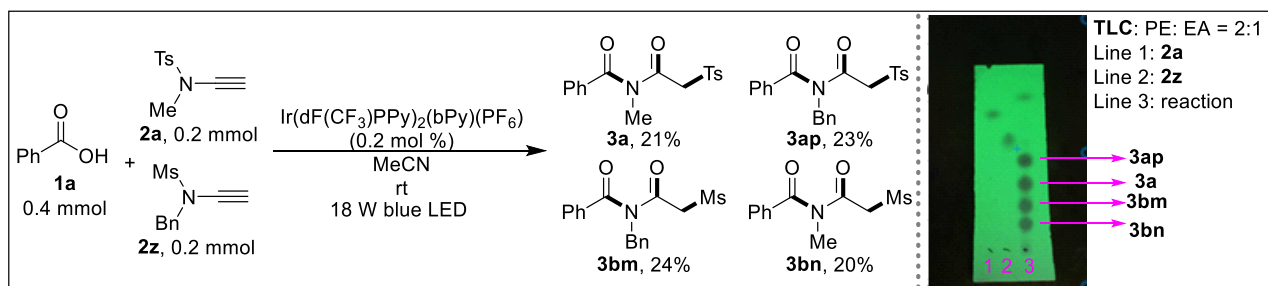

An oven-dried culture tube equipped with a magnetic stirrer bar was charged with benzoic acid **1a** (49 mg, 0.4 mmol), ynamide **2a** (42 mg, 0.2 mmol), ynamide **2z** (42 mg, 0.2 mmol) and  $\text{Ir}(\text{dF}(\text{CF}_3)\text{PPy})_2(\text{bPy})(\text{PF}_6)$  (0.8 mg, 0.2 mol %), and then purged with argon three times. Anhydrous MeCN (4 mL) was added as solvent and the reaction was stirred at room temperature for 5h under the irradiation of a Blue LED lamp (18 W). TLC analysis showed that there were four products formed (**3a**, **3ap**, **3bm** and **3bn**). The mixture was concentrated and the yields of four products were determined by  $^1\text{H}$  NMR spectroscopy (0.1 mmol of 1,3,5-trioxane as an internal standard, **Fig. S8**).

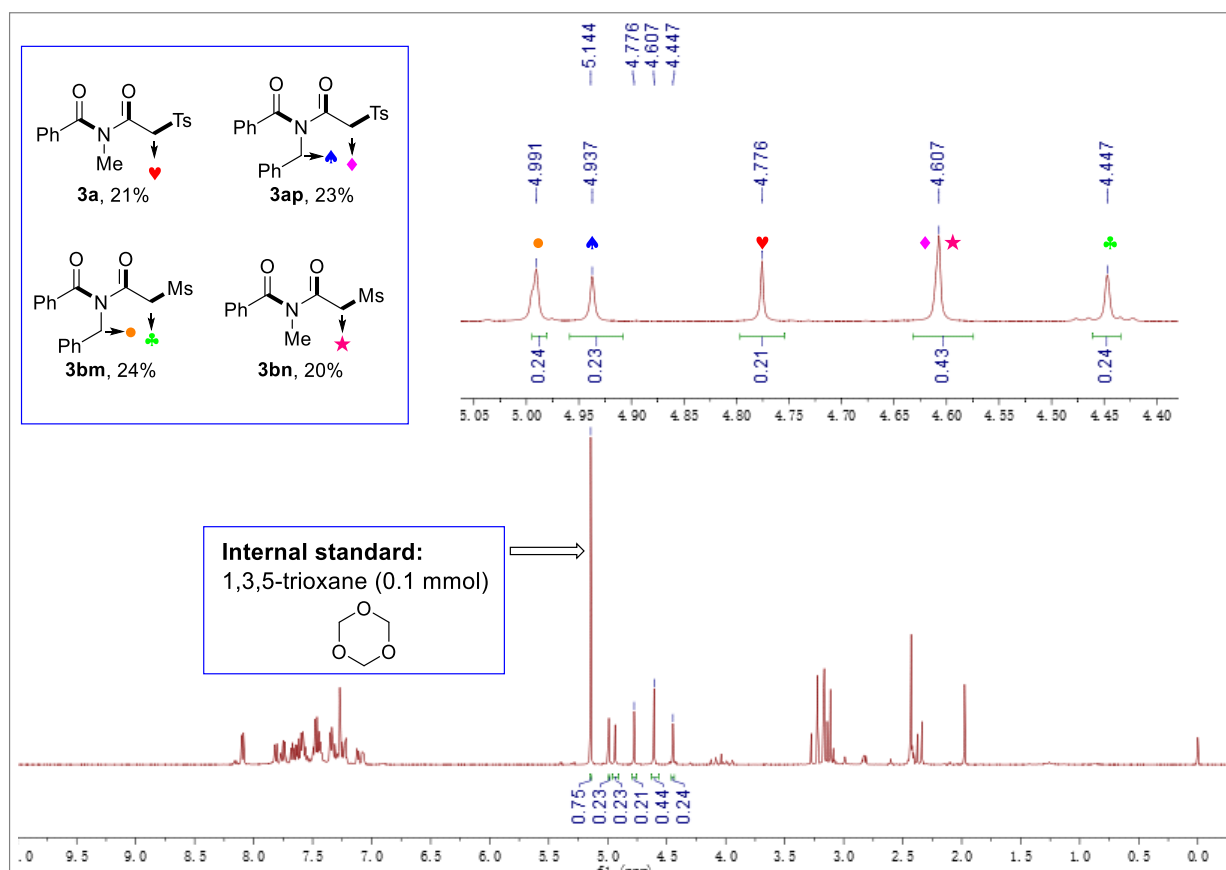

**Fig. S8**  $^1\text{H}$  NMR (CDCl<sub>3</sub>, 500 MHz) of the crossover reaction. The NMR shows **3a**, **3ap**, **3bm** and **3bn** were formed in comparable yields, indicating the intermolecular process in the imidation reaction.

## 7.6 Cyclic Voltammograms

Cyclic voltammograms were taken on a C-H Instruments 840B potentiostat using a glassy carbon working electrode, a Ag/AgCl reference electrode (SCE), and a Pt wire counter electrode. The pH was not adjusted and voltammograms were taken at room temperature in a 100 mM MeCN solution of tetrabutylammonium hexafluorophosphate containing 10 mM of **4a**. The scan rate was 100 mV/s. The reduction potential of  $[\text{Ir}(\text{dF}(\text{CF}_3)\text{ppy})_2(\text{bpy})]^+$  ( $E_{1/2}[\text{Ir}^{\text{IV}}/*\text{Ir}^{\text{III}}] = -1.00 \text{ V vs SCE}$ )<sup>6</sup> shows not higher than that of intermediate **4a** ( $E_{1/2}^{\text{red}} = -1.00 \text{ V}$ ) (**Fig. S9**), indicating that the reduction of intermediate **4a** by the excited state  $*\text{Ir}^{\text{III}}$  was thermodynamically unfavorable.

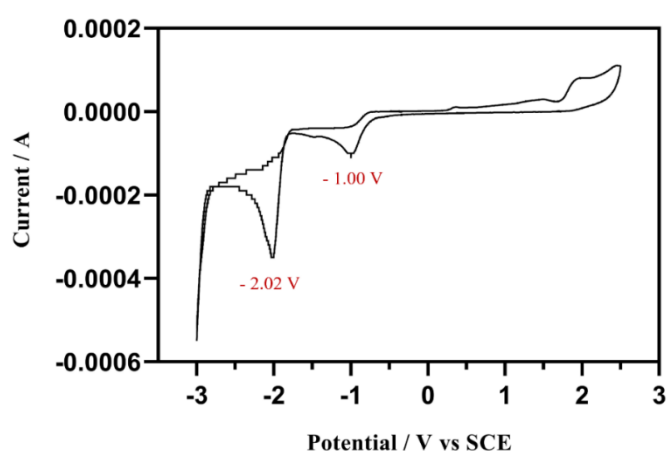

**Fig. S9** Cyclic voltammograms. The reduction potential of intermediate **4a** is  $E_{1/2}^{\text{red}} = -1.00 \text{ V}$ .

## 7.7 UV Sensitizer Experiments

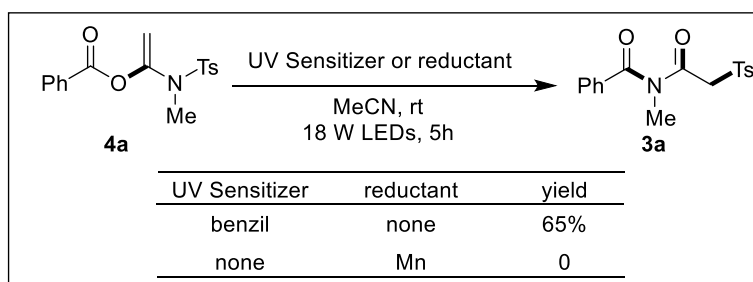

An oven-dried culture tube equipped with a magnetic stirrer bar was charged with **4a** (33 mg, 0.1 mmol) and benzil (22 mg, 0.1 mmol) or Mn powder (110 mg, 0.2 mmol), and then purged with argon three times. Anhydrous MeCN (1 mL) was added as solvent and the reaction was stirred at room temperature for 5h under the irradiation of 18W Blue LED lamp. The reactions were analysed by TLC, showing the benzyl promoted the imidation, while Mn powder failed to deliver the product. The reaction of benzil was further analysed by  $^1\text{H}$  NMR (adding 0.1 mmol 1,3,5-trioxane was used as an internal standard), showing **3a** could be formed in 65% yield (**Fig. S10**).

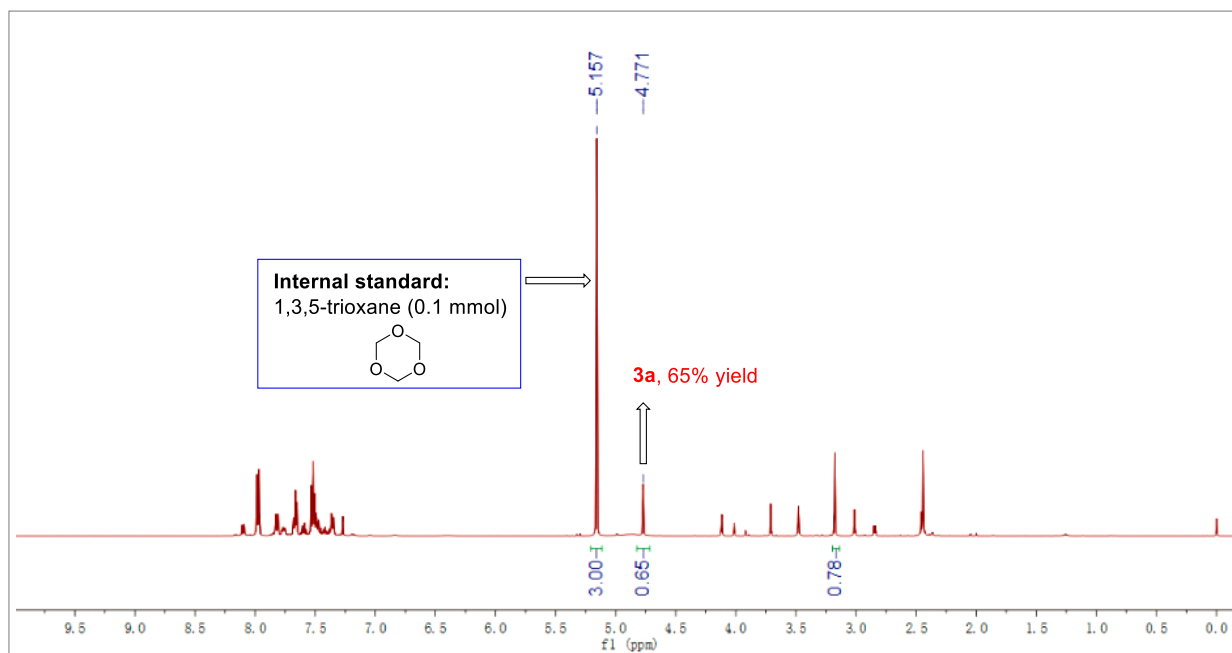

**Fig. S10**  $^1\text{H}$  NMR ( $\text{CDCl}_3$ , 500 MHz) of the benzyl-promoted reaction. The benzil could promote the formation of **3a** in 65% yield.

UV Sensitizer could promote this reaction, strongly suggesting that an energy transfer mechanism is indeed involved. Using Mn powder ( $E^\circ = -1.42$  V vs. SCE (saturated calomel electrode))<sup>7</sup> as an external reductant (comparable to  $[\text{Ir}(\text{dF}(\text{CF}_3)\text{ppy})_2](\text{bpy})^+$  ( $E_{1/2}[\text{Ir}^{\text{IV}}/\text{Ir}^{\text{III}}] = -1.00$  V vs SCE)<sup>6</sup> failed to promote the desired reaction, indicating that photoredox pathway was not operative for this transformation.

## 7.8 Determination of The Reaction Quantum Yield

### (1) Determination of the light intensity at 452 nm:

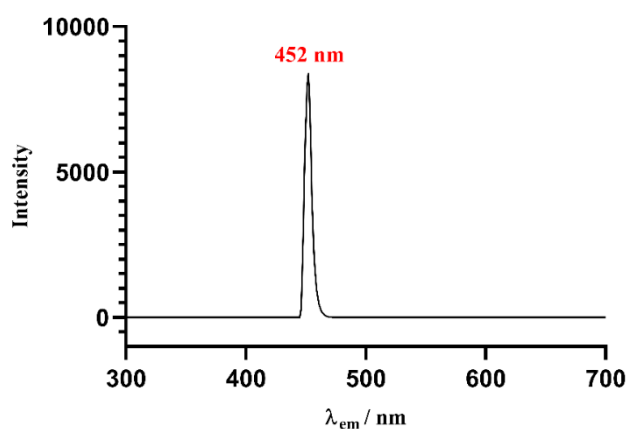

**Fig. S11.** Emission spectrum of blue LED.  $\lambda_{\text{max}} = 452$  nm (Using Hitachi F-2500 fluorescence spectrometer).

Absorbance of samples were recorded using a PERSEE TU-1810 UV-visible spectrophotometer.

According to the procedure of Yoon<sup>8</sup>, the photon flux of the blue LED ( $\lambda_{\text{max}} = 452 \text{ nm}$ ) was determined by standard ferrioxalate actinometry. 2.21 g of potassium ferrioxalate hydrate was dissolved in 30 mL of 0.05 M  $\text{H}_2\text{SO}_4$  to prepare a 0.15 M solution of ferrioxalate. A buffered solution of 1, 10-phenanthroline was prepared by dissolving 50 mg of 1,10-phenanthroline and 11.25 g of sodium acetate in 50 mL of 0.5 M  $\text{H}_2\text{SO}_4$ . Both solutions were stored in the dark. To determine the photon flux of the blue LED ( $\lambda_{\text{max}} = 452 \text{ nm}$ , **Fig. S11**), 2.0 mL of the ferrioxalate solution was placed in a 3 mL cuvette and irradiated for 90.0 seconds. After irradiation, 0.35 mL of the 1,10-phenanthroline solution was added to the cuvette. The solution was then allowed to rest for 1 h to allow the ferrous ions to completely coordinate to the phenanthroline. The absorbance of the solution was measured at 510 nm. A non-irradiated sample was also prepared and the absorbance at 510 nm measured. Conversion was calculated using eq 1.

$$\text{mol Fe}^{2+} = \frac{V \times \Delta A}{l \times \epsilon} \quad (\text{eq 1})$$

Where V is the total volume (0.00235 L) of the solution after addition of 1,10-phenanthroline,  $\Delta A$  is the difference in absorbance at 510 nm between the irradiated and non-irradiated solutions (1.541 – 0.786), l is the path length (1.0 cm), and  $\epsilon$  is the molar absorptivity at 510 nm (11100  $\text{L} \cdot \text{mol}^{-1} \cdot \text{cm}^{-1}$ ). The photon flux can be calculated using eq 2.

$$\text{photon flux} = \frac{\text{mol Fe}^{2+}}{\Phi \times t \times f} \quad (\text{eq 2})$$

Where  $\Phi$  is the quantum yield for the ferrioxalate actinometer (approximate value: 0.845 for a 0.15 M solution at  $\lambda = 458 \text{ nm}$ )<sup>9</sup>, t is the time (90.0 s).

f is the fraction of light absorbed at  $\lambda = 452 \text{ nm}$ , which was calculated using eq 3.

$$f = 1 - 10^{-A(\lambda = 452 \text{ nm})} \quad (\text{eq 3})$$

where A is the measured absorbance of above ferrioxalate solution at 452 nm (1.817).

The photon flux calculation:

$$\text{mol Fe}^{2+} = \frac{V \times \Delta A}{l \times \epsilon} = \frac{0.00235 \text{ L} \times (1.541 - 0.786)}{1 \text{ cm} \times 11100 \text{ L} \cdot \text{mol}^{-1} \cdot \text{cm}^{-1}} = 1.598423 \times 10^{-7} \text{ mol}$$

$$f = 1 - 10^{-A(\lambda = 452 \text{ nm})} = 1 - 10^{-1.817} = 0.9847595$$

$$\text{photon flux} = \frac{\text{mol Fe}^{2+}}{\Phi \times t \times f} = \frac{1.598423 \times 10^{-7} \text{ mol}}{0.845 \times 90 \text{ s} \times 0.9847595} = 2.13 \times 10^{-9} \text{ einstein} \cdot \text{s}^{-1}$$

## (2) Determination of the reaction quantum yield:

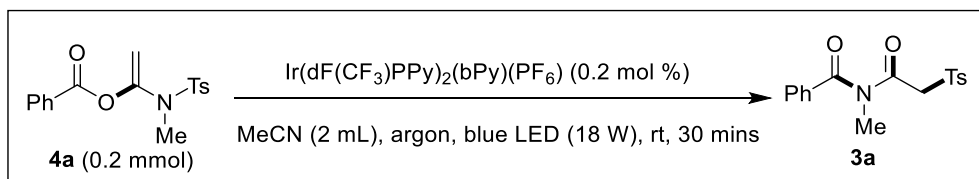

**PC-2**  $\text{Ir}(\text{dF}(\text{CF}_3)\text{PPy})_2(\text{bPy})(\text{PF}_6)$  (6.0mg) was dissolved in 30 mL anhydrous MeCN. An oven-dried culture tube equipped with a magnetic stirrer bar was charged with **4a** (66 mg, 0.2 mmol), then purged with argon three times. 2 mL of above **PC** solution was added and the mixture was stirred under the irradiation of 18 W Blue LED for 30 mins (1800 s) at room temperature. The reaction was concentrated under vacuum to obtain the residue, which was analysed by  $^1\text{H}$  NMR (adding 0.1 mmol 1,3,5-trioxane was used as an internal standard), showing **3a** could be formed in 30% yield ( $0.06 \times 10^{-3}$  mol). The reaction quantum yield ( $\Phi$ ) was determined using eq 4

$$\Phi = \frac{\text{mol of } \mathbf{3a}}{\text{photon flux} \times t \times f} \quad (\text{eq 4})$$

where the photon flux is  $2.13 \times 10^{-9}$  einstein  $\text{s}^{-1}$  (determined by actinometry as described above),  $t$  is the reaction time (1800 s) and  $f$  is the fraction of incident light absorbed by the reaction mixture, determined using eq 3. An absorbance of the reaction mixture at 452 nm was measured to be 0.100.

The reaction quantum yield ( $\Phi$ ) calculation:

$$\Phi = \frac{\text{mol of } \mathbf{3a}}{\text{photon flux} \times t \times f} = \frac{0.06 \times 10^{-3} \text{ mol}}{2.13 \times 10^{-9} \text{ einstein} \cdot \text{s}^{-1} \times 1800 \text{ s} \times (1 - 10^{-0.100})} = 76.1$$

The value of quantum yield suggests a radical chain propagation process for the present reaction.

## 8. Characterization of Products

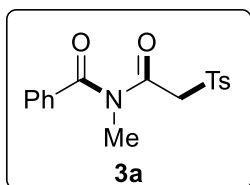

### *N*-methyl-*N*-(2-tosylacetyl)benzamide

**3a**: White solid (64 mg, 96% yield), m. p. 97 – 98 °C.

**TLC**:  $R_f = 0.20$  (PE: EA = 3:1, v/v).

$^1\text{H}$  NMR (500 MHz,  $\text{CDCl}_3$ )  $\delta$  7.84 – 7.80 (m, 2H), 7.68 – 7.64 (m, 2H), 7.61 – 7.56 (m, 1H), 7.51 – 7.47 (m, 2H), 7.35 (d,  $J = 8.0$  Hz, 2H), 4.77 (s, 2H), 3.17 (s, 3H), 2.44 (s, 3H).



$^{13}\text{C}$  NMR (125 MHz,  $\text{CDCl}_3$ )  $\delta$  174.4, 164.7, 145.3, 136.3, 133.7, 133.0, 129.9, 128.9 (129.93), 128.9 (128.86), 128.4, 61.9, 35.5, 21.7.

HRMS (ESI-TOF)  $m/z$ :  $(\text{M}+\text{H})^+$  calcd. For  $\text{C}_{17}\text{H}_{18}\text{NO}_4\text{S}$ , 332.0957; found, 332.0954.

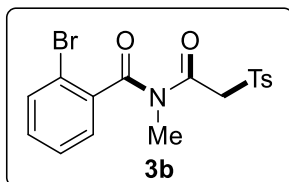

### 2-bromo-*N*-methyl-*N*-(2-tosylacetyl)benzamide

**3b**: Light yellow oil (80 mg, 98% yield).

TLC:  $R_f$  = 0.44 (PE: EA = 3:1, v/v).

$^1\text{H}$  NMR (500 MHz,  $\text{CDCl}_3$ )  $\delta$  7.89 – 7.85 (m, 2H), 7.62 (dd,  $J_1$  = 8.0 Hz,  $J_2$  = 0.5 Hz, 1H), 7.46 – 7.34 (m, 5H), 4.96 (s, 2H), 3.05 (s, 3H), 2.46 (s, 3H).

$^{13}\text{C}$  NMR (125 MHz,  $\text{CDCl}_3$ )  $\delta$  171.6, 164.7, 145.4, 137.0, 136.5, 133.3, 131.9, 129.9, 128.7, 128.1, 127.9, 118.6, 63.0, 33.7, 21.8.

HRMS (ESI-TOF)  $m/z$ :  $(\text{M}+\text{H})^+$  calcd. For  $\text{C}_{17}\text{H}_{17}\text{BrNO}_4\text{S}$ , 410.0062; found, 410.0066.

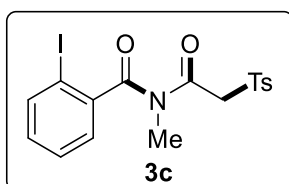

### 2-iodo-*N*-methyl-*N*-(2-tosylacetyl)benzamide

**3c**: White solid (84 mg, 92% yield), m. p. 87 – 88 °C.

TLC:  $R_f$  = 0.46 (PE: EA = 3:1, v/v).

$^1\text{H}$  NMR (500 MHz,  $\text{CDCl}_3$ )  $\delta$  7.90 – 7.86 (m, 3H), 7.50 – 7.45 (m, 1H), 7.40 – 7.35 (m, 3H), 7.21 – 7.16 (m, 1H), 4.96 (s, 2H), 3.04 (s, 3H), 2.46 (s, 3H).

$^{13}\text{C}$  NMR (125 MHz,  $\text{CDCl}_3$ )  $\delta$  172.9, 164.9, 145.4, 141.0, 139.8, 136.6, 131.8, 130.0, 128.8, 128.7, 127.5, 91.5, 63.0, 34.1, 21.9.

HRMS (ESI-TOF)  $m/z$ :  $(\text{M}+\text{H})^+$  calcd. For  $\text{C}_{17}\text{H}_{17}\text{INO}_4\text{S}$ , 457.9923; found, 457.9919.

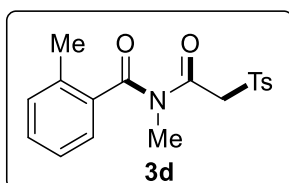

### *N*,2-dimethyl-*N*-(2-tosylacetyl)benzamide

**3d:** White solid (65 mg, 95% yield), m. p. 97 – 99 °C.

**TLC:**  $R_f = 0.35$  (PE: EA = 3:1, v/v).

**$^1\text{H}$  NMR (500 MHz,  $\text{CDCl}_3$ )**  $\delta$  7.85 (d,  $J = 8.5$  Hz, 2H), 7.41 – 7.35 (m, 3H), 7.33 – 7.25 (m, 3H), 4.90 (s, 2H), 3.05 (s, 3H), 2.46 (s, 3H), 2.37 (s, 3H).

**$^{13}\text{C}$  NMR (125 MHz,  $\text{CDCl}_3$ )**  $\delta$  174.1, 164.9, 145.3, 136.5, 135.9, 134.5, 131.3, 131.1, 129.9, 128.6, 126.8, 126.3, 62.9, 34.4, 21.8, 19.4.

**HRMS (ESI-TOF)  $m/z$ :** (M+H)<sup>+</sup> calcd. For  $\text{C}_{18}\text{H}_{20}\text{NO}_4\text{S}$ , 346.1113; found, 346.1110.

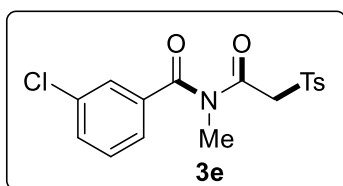

### 3-chloro-*N*-methyl-*N*-(2-tosylacetyl)benzamide

**3e:** White solid (64 mg, 88% yield), m. p. 88 – 89 °C.

**TLC:**  $R_f = 0.42$  (PE: EA = 3:1, v/v).

**$^1\text{H}$  NMR (500 MHz,  $\text{CDCl}_3$ )**  $\delta$  7.83 – 7.79 (m, 2H), 7.62 (M, 1H), 7.57 – 7.53 (m, 2H), 7.46 – 7.42 (m, 1H), 7.36 (d,  $J = 8.0$  Hz, 2H), 4.79 (s, 2H), 3.17 (s, 3H), 2.45 (s, 3H).

**$^{13}\text{C}$  NMR (125 MHz,  $\text{CDCl}_3$ )**  $\delta$  173.0, 164.5, 145.5, 136.2, 135.5, 135.0, 132.8, 130.2, 130.0, 128.8, 128.4, 126.9, 61.9, 35.4, 21.8.

**HRMS (ESI-TOF)  $m/z$ :** (M+H)<sup>+</sup> calcd. For  $\text{C}_{17}\text{H}_{17}\text{ClNO}_4\text{S}$ , 366.0567; found, 366.0561.

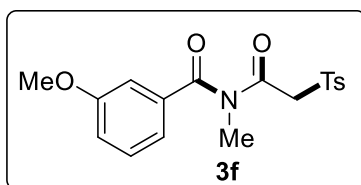

### 3-methoxy-*N*-methyl-*N*-(2-tosylacetyl)benzamide

**3f:** Colourless gum (70 mg, 97% yield).

**TLC:**  $R_f = 0.28$  (PE: EA = 3:1, v/v).

**$^1\text{H}$  NMR (500 MHz,  $\text{CDCl}_3$ )**  $\delta$  7.82 (d,  $J = 8.5$  Hz, 2H), 7.41 – 7.34 (m, 3H), 7.22 – 7.16 (m, 2H), 7.11 (dd,  $J_1 = 8.0$  Hz,  $J_2 = 2.5$  Hz, 1H), 4.75 (s, 2H), 3.86 (s, 3H), 3.17 (s, 3H), 2.45 (s, 3H).

**$^{13}\text{C}$  NMR (125 MHz,  $\text{CDCl}_3$ )**  $\delta$  174.2, 164.7, 159.9, 145.4, 136.3, 135.1, 130.0 (130.00), 130.0 (129.97), 128.5, 121.0, 119.0, 113.9, 62.0, 55.6, 35.5, 21.8.

**HRMS (ESI-TOF)  $m/z$ :** (M+H)<sup>+</sup> calcd. For C<sub>18</sub>H<sub>20</sub>NO<sub>5</sub>S, 362.1062; found, 362.1058.

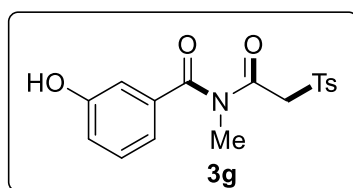

**3-hydroxy-N-methyl-N-(2-tosylacetyl)benzamide**

**3g:** Colourless gum (62 mg, 89% yield).

**TLC:** R<sub>f</sub> = 0.10 (PE: EA = 3:1, v/v).

**<sup>1</sup>H NMR (500 MHz, CDCl<sub>3</sub>)** δ 7.80 (d, *J* = 8.5 Hz, 2H), 7.34 (d, *J* = 8.5 Hz, 2H), 7.32 – 7.28 (m, 1H), 7.16 – 7.11 (m, 2H), 7.08 – 7.03 (m, 1H), 6.92 (br, 1H), 4.77 (s, 2H), 3.15 (s, 3H), 2.42 (s, 3H).

**<sup>13</sup>C NMR (125 MHz, CDCl<sub>3</sub>)** δ 174.3, 164.8, 156.5, 145.7, 136.0 134.8, 130.3, 130.1, 128.5, 120.8, 120.5, 115.6, 62.0, 35.6, 21.8.

**HRMS (ESI-TOF)  $m/z$ :** (M+H)<sup>+</sup> calcd. For C<sub>17</sub>H<sub>18</sub>NO<sub>5</sub>S, 348.0906; found, 348.0901.

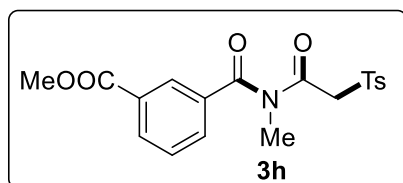

**methyl 3-(methyl(2-tosylacetyl)carbamoyl)benzoate**

**3h:** Colourless gum (72 mg, 93% yield).

**TLC:** R<sub>f</sub> = 0.15 (PE: EA = 3:1, v/v).

**<sup>1</sup>H NMR (400 MHz, CDCl<sub>3</sub>)** δ 8.33 – 8.29 (m, 1H), 8.27 – 8.23 (m, 1H), 7.89 – 7.85 (m, 1H), 7.82 (d, *J* = 8.0 Hz, 2H), 7.63 – 7.56 (m, 1H), 7.36 (d, *J* = 8.0 Hz, 2H), 4.81 (s, 2H), 3.96 (s, 3H), 3.18 (s, 3H), 2.44 (s, 3H).

**<sup>13</sup>C NMR (100 MHz, CDCl<sub>3</sub>)** δ 173.5, 165.8, 164.5, 145.5, 136.2, 134.2, 133.6, 133.0, 131.0, 130.0, 129.9, 129.2, 128.4, 61.9, 52.6, 35.5, 21.8.

**HRMS (ESI-TOF)  $m/z$ :** (M+H)<sup>+</sup> calcd. For C<sub>19</sub>H<sub>20</sub>NO<sub>6</sub>S, 390.1011; found, 390.1015.

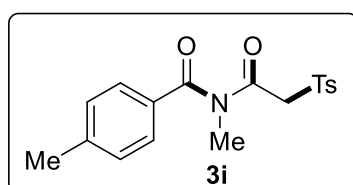

**N,4-dimethyl-N-(2-tosylacetyl)benzamide**

**3i:** White solid (50 mg, 73% yield), m. p. 97 – 99 °C.

**TLC:**  $R_f = 0.35$  (PE: EA = 3:1, v/v).

**$^1\text{H}$  NMR (500 MHz,  $\text{CDCl}_3$ )**  $\delta$  7.81 (d,  $J = 8.0$  Hz, 2H), 7.56 (d,  $J = 8.0$  Hz, 2H), 7.35 (d,  $J = 8.0$  Hz, 2H), 7.29 (d,  $J = 8.0$  Hz, 2H), 4.72 (s, 2H), 3.18 (s, 3H), 2.44 (s, 3H), 2.43 (s, 3H).

**$^{13}\text{C}$  NMR (125 MHz,  $\text{CDCl}_3$ )**  $\delta$  174.4, 164.7, 145.3, 144.1, 136.4, 130.8, 129.9, 129.6, 129.3, 128.5, 61.9, 35.6, 21.8.

**HRMS (ESI-TOF)  $m/z$ :** (M+H)<sup>+</sup> calcd. For  $\text{C}_{18}\text{H}_{20}\text{NO}_4\text{S}$ , 346.1113; found, 346.1108.

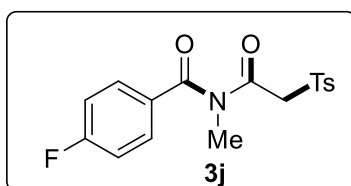

#### 4-fluoro-*N*-methyl-*N*-(2-tosylacetyl)benzamide

**3j:** White solid (63 mg, 90% yield), m. p. 95 – 96 °C.

**TLC:**  $R_f = 0.28$  (PE: EA = 3:1, v/v).

**$^1\text{H}$  NMR (400 MHz,  $\text{CDCl}_3$ )**  $\delta$  7.80 (d,  $J = 8.0$  Hz, 2H), 7.76 – 7.70 (m, 2H), 7.36 (d,  $J = 8.0$  Hz, 2H), 7.21 – 7.15 (m, 2H), 4.75 (s, 2H), 3.19 (s, 3H), 2.45 (s, 3H).

**$^{13}\text{C}$  NMR (100 MHz,  $\text{CDCl}_3$ )**  $\delta$  173.5, 165.5 (d,  $J = 255.2$  Hz), 164.5, 145.5, 136.3, 131.9 (d,  $J = 9.3$  Hz), 130.0, 129.8 (d,  $J = 3.2$  Hz), 128.4, 116.2 (d,  $J = 22.2$  Hz), 61.8, 35.6, 21.8.

**$^{19}\text{F}$  NMR (376 MHz,  $\text{CDCl}_3$ )**  $\delta$  -104.50.

**HRMS (ESI-TOF)  $m/z$ :** (M+H)<sup>+</sup> calcd. For  $\text{C}_{17}\text{H}_{17}\text{FNO}_4\text{S}$ , 350.0862; found, 350.0862.

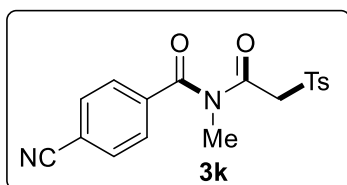

#### 4-cyano-*N*-methyl-*N*-(2-tosylacetyl)benzamide

**3k:** White solid (65 mg, 92% yield), m. p. 117 – 118 °C.

**TLC:**  $R_f = 0.21$  (PE: EA = 3:1, v/v).

**$^1\text{H}$  NMR (400 MHz,  $\text{CDCl}_3$ )**  $\delta$  7.82 – 7.78 (m, 6H), 7.37 (d,  $J = 8.4$  Hz, 2H), 4.81 (s, 2H), 3.18 (s, 3H), 2.46 (s, 3H).

**$^{13}\text{C}$  NMR (100 MHz,  $\text{CDCl}_3$ )**  $\delta$  171.9, 163.3, 144.7, 137.0, 135.1, 131.7, 129.1, 128.3, 127.4, 116.7, 115.1, 60.9, 34.3, 20.8.

**HRMS (ESI-TOF)  $m/z$ : (M+H)<sup>+</sup> calcd. For C<sub>18</sub>H<sub>17</sub>N<sub>2</sub>O<sub>4</sub>S, 357.0909; found, 357.0903.**

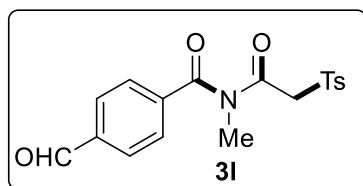

**4-formyl-*N*-methyl-*N*-(2-tosylacetyl)benzamide**

**3l:** White solid (69 mg, 96% yield), m. p. 125 – 126 °C.

**TLC:** R<sub>f</sub> = 0.14 (PE: EA = 3:1, v/v).

**<sup>1</sup>H NMR (500 MHz, CDCl<sub>3</sub>)** δ 10.11 (s, 1H), 8.03 – 7.99 (m, 2H), 7.86 – 7.79 (m, 4H), 7.40 – 7.35 (m, 2H), 4.82 (s, 2H), 3.18 (s, 3H), 2.46 (s, 3H).

**<sup>13</sup>C NMR (125 MHz, CDCl<sub>3</sub>)** δ 191.3, 173.5, 164.5, 145.6, 139.1, 138.8, 136.2, 130.1, 130.0, 129.3, 128.4, 62.0, 35.3, 21.8.

**HRMS (ESI-TOF)  $m/z$ : (M+H)<sup>+</sup> calcd. For C<sub>18</sub>H<sub>18</sub>NO<sub>5</sub>S, 360.0906; found, 360.0900.**

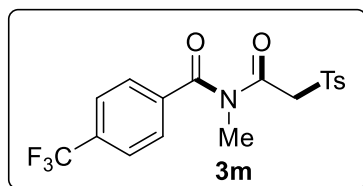

***N*-methyl-*N*-(2-tosylacetyl)-4-(trifluoromethyl)benzamide**

**3m:** White solid (73 mg, 91% yield), m. p. 68 – 69 °C.

**TLC:** R<sub>f</sub> = 0.36 (PE: EA = 3:1, v/v).

**<sup>1</sup>H NMR (400 MHz, CDCl<sub>3</sub>)** δ 7.87 – 7.71 (m, 6H), 7.37 (d, *J* = 8.4 Hz, 2H), 4.82 (s, 2H), 3.18 (s, 3H), 2.45 (s, 3H).

**<sup>13</sup>C NMR (100 MHz, CDCl<sub>3</sub>)** δ 173.3, 164.4, 145.6, 137.3, 136.2, 134.2 (q, *J* = 32.9 Hz), 130.1, 129.2, 128.4, 126.0 (q, *J* = 3.5 Hz), 123.5 (q, *J* = 272.8 Hz), 62.0, 35.4, 21.8.

**<sup>19</sup>F NMR (376 MHz, CDCl<sub>3</sub>)** δ -63.14.

**HRMS (ESI-TOF)  $m/z$ : (M+H)<sup>+</sup> calcd. For C<sub>18</sub>H<sub>17</sub>F<sub>3</sub>NO<sub>4</sub>S, 400.0830; found, 400.0823.**

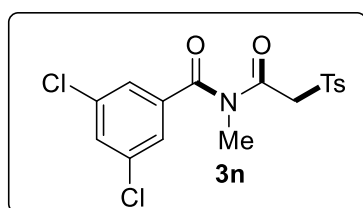

**3,5-dichloro-*N*-methyl-*N*-(2-tosylacetyl)benzamide**

**3n**: White solid (74 mg, 93% yield), m. p. 137 – 139 °C.

**TLC**:  $R_f = 0.43$  (PE: EA = 3:1, v/v).

**$^1\text{H}$  NMR (400 MHz,  $\text{CDCl}_3$ )**  $\delta$  7.80 (d,  $J = 8.4$  Hz, 2H), 7.57 – 7.54 (m, 1H), 7.53 – 7.50 (m, 2H), 7.37 (d,  $J = 8.4$  Hz, 2H), 4.79 (s, 2H), 3.18 (s, 3H), 2.46 (s, 3H).

**$^{13}\text{C}$  NMR (100 MHz,  $\text{CDCl}_3$ )**  $\delta$  171.9, 164.4, 145.7, 136.8, 136.2, 135.9, 132.6, 130.1, 128.5, 127.0, 61.9, 35.4, 21.9.

**HRMS (ESI-TOF)**  $m/z$ :  $(\text{M}+\text{H})^+$  calcd. For  $\text{C}_{17}\text{H}_{16}\text{Cl}_2\text{NO}_4\text{S}$ , 400.0177; found, 400.0173.

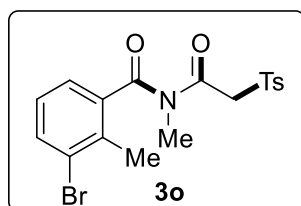

### 3-bromo-*N*,2-dimethyl-*N*-(2-tosylacetyl)benzamide

**3o**: White solid (73 mg, 86% yield), m. p. 164 – 165 °C.

**TLC**:  $R_f = 0.36$  (PE: EA = 3:1, v/v).

**$^1\text{H}$  NMR (400 MHz,  $\text{CDCl}_3$ )**  $\delta$  7.85 (d,  $J = 8.4$  Hz, 2H), 7.68 (dd,  $J_1 = 8.0$  Hz,  $J_2 = 0.8$  Hz, 1H), 7.38 (d,  $J = 8.0$  Hz, 2H), 7.30 (dd,  $J_1 = 8.0$  Hz,  $J_2 = 0.8$  Hz, 1H), 7.21 – 7.13 (m, 1H), 4.96 (s, 2H), 3.04 (s, 3H), 2.46 (s, 3H), 2.40 (s, 3H).

**$^{13}\text{C}$  NMR (100 MHz,  $\text{CDCl}_3$ )**  $\delta$  173.0, 164.8, 145.5, 136.9, 136.6, 135.1, 134.9, 130.0, 128.6, 127.8, 126.9, 125.4, 63.1, 34.4, 21.9, 20.0.

**HRMS (ESI-TOF)**  $m/z$ :  $(\text{M}+\text{H})^+$  calcd. For  $\text{C}_{18}\text{H}_{19}\text{BrNO}_4\text{S}$ , 424.0218; found, 424.0213.

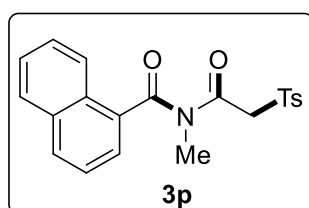

### *N*-methyl-*N*-(2-tosylacetyl)-1-naphthamide

**3p**: White solid (61 mg, 80% yield), m. p. 145 – 146 °C.

**TLC**:  $R_f = 0.36$  (PE: EA = 3:1, v/v).

**$^1\text{H}$  NMR (400 MHz,  $\text{CDCl}_3$ )**  $\delta$  8.00 (d,  $J = 8.0$  Hz, 2H), 7.94 – 7.90 (m, 1H), 7.87 (d,  $J = 8.4$  Hz, 2H), 7.64 – 7.51 (m, 4H), 7.38 (d,  $J = 8.0$  Hz, 2H), 4.99 (s, 2H), 3.07 (s, 3H), 2.46 (s, 3H).

$^{13}\text{C}$  NMR (100 MHz,  $\text{CDCl}_3$ )  $\delta$  173.8, 165.0, 145.4, 136.6, 133.7, 132.4, 131.9, 130.0, 129.6, 128.9, 128.7, 128.2, 127.1, 126.0, 125.0, 124.5, 63.0, 34.8, 21.9.

HRMS (ESI-TOF)  $m/z$ :  $(\text{M}+\text{H})^+$  calcd. For  $\text{C}_{21}\text{H}_{20}\text{NO}_4\text{S}$ , 382.1113; found, 382.1107.

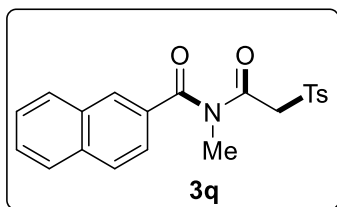

### *N*-methyl-*N*-(2-tosylacetyl)-2-naphthamide

**3q**: White solid (55 mg, 72% yield), m. p. 174 – 175 °C.

TLC:  $R_f$  = 0.36 (PE: EA = 3:1, v/v).

$^1\text{H}$  NMR (400 MHz,  $\text{CDCl}_3$ )  $\delta$  8.20 (s, 1H), 7.98 – 7.88 (m, 3H), 7.83 (d,  $J$  = 8.4 Hz, 2H), 7.69 (dd,  $J_1$  = 8.4 Hz,  $J_2$  = 1.6 Hz, 1H), 7.66 – 7.56 (m, 2H), 7.35 (d,  $J$  = 8.4 Hz, 2H), 4.79 (s, 2H), 3.25 (s, 3H), 2.42 (s, 3H).

$^{13}\text{C}$  NMR (100 MHz,  $\text{CDCl}_3$ )  $\delta$  174.6, 164.8, 145.4, 136.4, 135.4, 132.5, 131.0, 130.6, 130.0, 129.4, 128.9 (128.93), 128.9 (128.86), 128.6, 128.0, 127.4, 124.7, 62.0, 35.7, 21.8.

HRMS (ESI-TOF)  $m/z$ :  $(\text{M}+\text{H})^+$  calcd. For  $\text{C}_{21}\text{H}_{20}\text{NO}_4\text{S}$ , 382.1113; found, 382.1109.

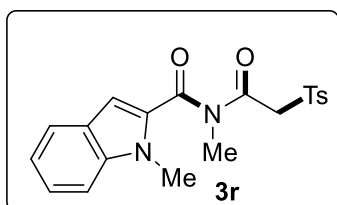

### *N*,1-dimethyl-*N*-(2-tosylacetyl)-1*H*-indole-2-carboxamide

**3r**: White solid (50 mg, 65% yield), m. p. 127 – 128 °C.

TLC:  $R_f$  = 0.35 (PE: EA = 3:1, v/v).

$^1\text{H}$  NMR (400 MHz,  $\text{CDCl}_3$ )  $\delta$  7.79 (d,  $J$  = 8.0 Hz, 2H), 7.67 (d,  $J$  = 8.0 Hz, 1H), 7.42 (d,  $J$  = 4.0 Hz, 2H), 7.34 (d,  $J$  = 8.0 Hz, 2H), 7.23 – 7.16 (m, 1H), 6.96 (s, 1H), 4.60 (s, 2H), 3.99 (s, 3H), 3.36 (s, 3H), 2.42 (s, 3H).

$^{13}\text{C}$  NMR (100 MHz,  $\text{CDCl}_3$ )  $\delta$  166.7, 164.6, 145.5, 140.3, 136.1, 130.3, 130.0, 128.6, 126.4, 125.8, 123.1, 121.5, 111.3, 110.6, 62.4, 35.9, 31.7, 21.8.

HRMS (ESI-TOF)  $m/z$ :  $(\text{M}+\text{H})^+$  calcd. For  $\text{C}_{20}\text{H}_{21}\text{N}_2\text{O}_4\text{S}$ , 385.1222; found, 385.1219.

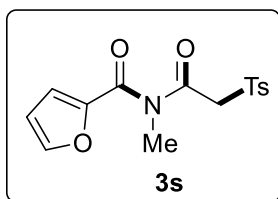

***N*-methyl-*N*-(2-tosylacetyl)furan-2-carboxamide**

**3s:** Colourless oil (51 mg, 79% yield).

**TLC:**  $R_f = 0.14$  (PE: EA = 3:1, v/v).

**$^1\text{H}$  NMR (500 MHz,  $\text{CDCl}_3$ )**  $\delta$  7.81 (d,  $J = 8.0$  Hz, 2H), 7.64 (dd,  $J_1 = 1.5$  Hz,  $J_2 = 1.0$  Hz, 1H), 7.33 (d,  $J = 8.0$  Hz, 2H), 7.30 (dd,  $J_1 = 3.5$  Hz,  $J_2 = 0.5$  Hz, 1H), 6.61 (dd,  $J_1 = 3.5$  Hz,  $J_2 = 1.5$  Hz, 1H), 4.71 (s, 2H), 3.33 (s, 3H), 2.43 (s, 3H).

**$^{13}\text{C}$  NMR (125 MHz,  $\text{CDCl}_3$ )**  $\delta$  164.4, 162.2, 147.0, 146.6, 145.3, 136.3, 129.9, 128.6, 121.5, 112.8, 61.9, 34.0, 21.8.

**HRMS (ESI-TOF)  $m/z$ :** ( $\text{M}+\text{H}$ ) $^+$  calcd. For  $\text{C}_{15}\text{H}_{16}\text{NO}_5\text{S}$ , 322.0749; found, 322.0749.

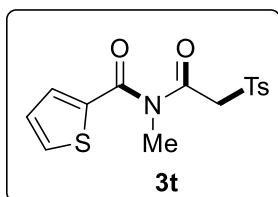

***N*-methyl-*N*-(2-tosylacetyl)thiophene-2-carboxamide**

**3t:** White solid (61 mg, 91% yield), m. p. 107 – 108 °C.

**TLC:**  $R_f = 0.21$  (PE: EA = 3:1, v/v).

**$^1\text{H}$  NMR (500 MHz,  $\text{CDCl}_3$ )**  $\delta$  7.81 (d,  $J = 8.0$  Hz, 2H), 7.72 (d,  $J = 4.5$  Hz, 1H), 7.63 – 7.59 (m, 1H), 7.34 (d,  $J = 8.0$  Hz, 2H), 7.17 – 7.15 (m, 1H), 4.70 (s, 2H), 3.37 (s, 3H), 2.43 (s, 3H).

**$^{13}\text{C}$  NMR (125 MHz,  $\text{CDCl}_3$ )**  $\delta$  167.3, 164.4, 145.4, 136.8, 136.3, 134.5, 134.0, 130.0, 128.6, 128.1, 61.8, 35.8, 21.8.

**HRMS (ESI-TOF)  $m/z$ :** ( $\text{M}+\text{H}$ ) $^+$  calcd. For  $\text{C}_{15}\text{H}_{16}\text{NO}_4\text{S}_2$ , 338.0521; found, 338.0520.

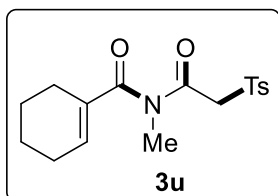

***N*-methyl-*N*-(2-tosylacetyl)cyclohex-1-ene-1-carboxamide**

**3u:** Colourless oil (33 mg, 49% yield).



**TLC:**  $R_f = 0.43$  (PE: EA = 3:1, v/v).

**$^1\text{H}$  NMR (500 MHz,  $\text{CDCl}_3$ )**  $\delta$  7.80 (d,  $J = 8.0$  Hz, 2H), 7.36 (d,  $J = 8.0$  Hz, 2H), 6.56 – 6.40 (m, 1H), 4.64 (s, 2H), 3.15 (s, 3H), 2.45 (s, 3H), 2.33 – 2.21 (m, 4H), 1.77 – 1.63 (m, 4H).

**$^{13}\text{C}$  NMR (125 MHz,  $\text{CDCl}_3$ )**  $\delta$  175.4, 164.6, 145.3, 139.7, 136.4, 134.3, 129.9, 128.6, 61.9, 34.8, 25.7, 24.7, 21.9, 21.8, 21.4.

**HRMS (ESI-TOF)**  $m/z$ :  $(\text{M}+\text{H})^+$  calcd. For  $\text{C}_{17}\text{H}_{22}\text{NO}_4\text{S}$ , 336.1270; found, 336.1273.

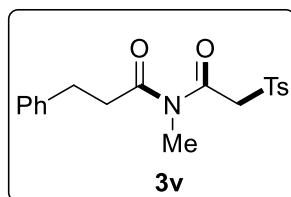

### ***N*-methyl-3-phenyl-*N*-(2-tosylacetyl)propanamide**

**3v:** White solid (60 mg, 83% yield), m. p. 105 – 106 °C.

**TLC:**  $R_f = 0.28$  (PE: EA = 3:1, v/v).

**$^1\text{H}$  NMR (500 MHz,  $\text{CDCl}_3$ )**  $\delta$  7.83 – 7.80 (m, 2H), 7.36 – 7.33 (m, 2H), 7.32 – 7.28 (m, 2H), 7.25 – 7.19 (m, 3H), 4.80 (s, 2H), 3.18 (s, 3H), 2.98 – 2.92 (m, 2H), 2.89 – 2.82 (m, 2H), 2.44 (s, 3H).

**$^{13}\text{C}$  NMR (125 MHz,  $\text{CDCl}_3$ )**  $\delta$  175.4, 164.7, 145.3, 140.2, 136.5, 129.9, 128.7, 128.6, 128.5, 126.5, 63.2, 39.1, 31.7, 30.5, 21.8.

**HRMS (ESI-TOF)**  $m/z$ :  $(\text{M}+\text{H})^+$  calcd. For  $\text{C}_{19}\text{H}_{22}\text{NO}_4\text{S}$ , 360.1270; found, 360.1267.

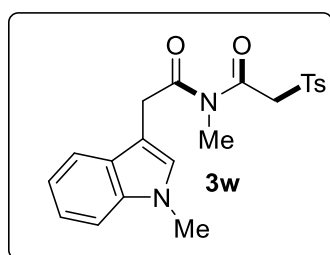

### ***N*-methyl-2-(1-methyl-1*H*-indol-3-yl)-*N*-(2-tosylacetyl)acetamide**

**3w:** Colourless oil (63 mg, 79% yield).

**TLC:**  $R_f = 0.14$  (PE: EA = 3:1, v/v).

**$^1\text{H}$  NMR (400 MHz,  $\text{CDCl}_3$ )**  $\delta$  7.79 (d,  $J = 8.0$  Hz, 2H), 7.54 (d,  $J = 8.0$  Hz, 1H), 7.34 – 7.22 (m, 4H), 7.17 – 7.11 (m, 1H), 7.04 (s, 1H), 4.82 (s, 2H), 4.03 (s, 2H), 3.77 (s, 3H), 3.25 (s, 3H), 2.42 (s, 3H).

**$^{13}\text{C}$  NMR (100 MHz,  $\text{CDCl}_3$ )**  $\delta$  174.7, 165.0, 145.2, 137.0, 136.7, 129.9, 128.6, 128.0, 127.5, 122.2, 119.6, 118.7, 109.7, 105.4, 63.4, 34.5, 32.9, 32.2, 21.8.

**HRMS (ESI-TOF)  $m/z$ :** (M+H)<sup>+</sup> calcd. For C<sub>21</sub>H<sub>23</sub>N<sub>2</sub>O<sub>4</sub>S, 399.1379; found, 399.1376.

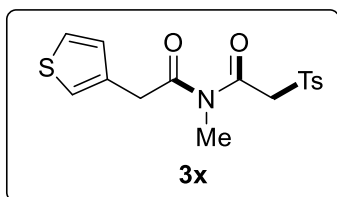

***N*-methyl-2-(thiophen-3-yl)-*N*-(2-tosylacetyl)acetamide**

**3v:** Colourless oil (56 mg, 80% yield).

**TLC:** R<sub>f</sub> = 0.21 (PE: EA = 3:1, v/v).

**<sup>1</sup>H NMR (400 MHz, CDCl<sub>3</sub>)** δ 7.80 (d, *J* = 8.4 Hz, 2H), 7.37 – 7.30 (m, 3H), 7.15 – 7.11 (m, 1H), 6.99 (dd, *J*<sub>1</sub> = 4.8 Hz, *J*<sub>2</sub> = 1.2 Hz, 1H), 4.80 (s, 2H), 3.94 (s, 2H), 3.24 (s, 3H), 2.44 (s, 3H).

**<sup>13</sup>C NMR (100 MHz, CDCl<sub>3</sub>)** δ 173.9, 164.8, 145.3, 136.5, 132.5, 129.9, 128.6, 128.4, 126.3, 123.5, 63.2, 38.8, 32.0, 21.8.

**HRMS (ESI-TOF)  $m/z$ :** (M+H)<sup>+</sup> calcd. For C<sub>16</sub>H<sub>18</sub>NO<sub>4</sub>S<sub>2</sub>, 352.0677; found, 352.0673.

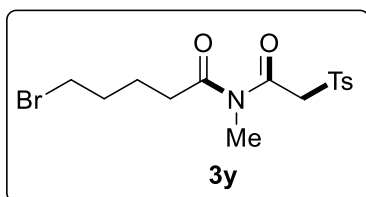

**5-bromo-*N*-methyl-*N*-(2-tosylacetyl)pentanamide**

**3y:** Colourless oil (33 mg, 43% yield).

**TLC:** R<sub>f</sub> = 0.10 (PE: EA = 3:1, v/v).

**<sup>1</sup>H NMR (500 MHz, CDCl<sub>3</sub>)** δ 7.82 (d, *J* = 8.0 Hz, 2H), 7.37 (d, *J* = 8.0 Hz, 2H), 4.81 (s, 2H), 3.44 (t, *J* = 6.5 Hz, 2H), 3.23 (s, 3H), 2.61 (t, *J* = 7.0 Hz, 2H), 2.46 (s, 3H), 1.96 – 1.90 (m, 2H), 1.85 – 1.78 (m, 2H).

**<sup>13</sup>C NMR (125 MHz, CDCl<sub>3</sub>)** δ 175.7, 164.7, 145.3, 136.5, 129.9, 128.6, 63.3, 36.2, 33.3, 31.8, 23.0, 21.8.

**HRMS (ESI-TOF)  $m/z$ :** (M+H)<sup>+</sup> calcd. For C<sub>15</sub>H<sub>21</sub>BrNO<sub>4</sub>S, 390.0375; found, 390.0377.

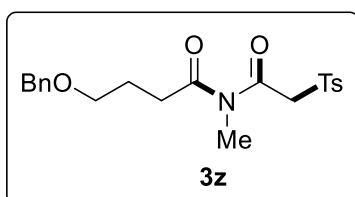

**4-(benzyloxy)-*N*-methyl-*N*-(2-tosylacetyl)butanamide**

**3z:** Colourless oil (50 mg, 62% yield).

**TLC:**  $R_f = 0.21$  (PE: EA = 3:1, v/v).

**$^1\text{H}$  NMR (500 MHz,  $\text{CDCl}_3$ )**  $\delta$  7.83 – 7.79 (m, 2H), 7.36 – 7.26 (m, 7H), 4.80 (s, 2H), 4.49 (s, 2H), 3.53 (t,  $J = 6.0$  Hz, 2H), 3.20 (s, 3H), 2.66 (t,  $J = 7.0$  Hz, 2H), 2.43 (s, 3H), 1.99 – 1.90 (m, 2H).

**$^{13}\text{C}$  NMR (125 MHz,  $\text{CDCl}_3$ )**  $\delta$  176.1, 164.7, 145.2, 138.3, 136.6, 129.8, 128.6, 128.5, 127.8, 73.0, 68.7, 63.3, 33.8, 31.7, 24.6, 21.8.

**HRMS (ESI-TOF)  $m/z$ :** (M+H)<sup>+</sup> calcd. For  $\text{C}_{21}\text{H}_{26}\text{NO}_5\text{S}$ , 404.1532; found, 404.1531.

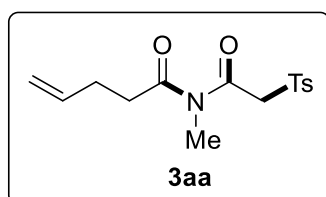

#### ***N*-methyl-*N*-(2-tosylacetyl)pent-4-enamide**

**3aa:** Colourless oil (37 mg, 60% yield).

**TLC:**  $R_f = 0.36$  (PE: EA = 3:1, v/v).

**$^1\text{H}$  NMR (500 MHz,  $\text{CDCl}_3$ )**  $\delta$  7.82 (d,  $J = 8.0$  Hz, 2H), 7.36 (d,  $J = 8.0$  Hz, 2H), 5.88 – 5.78 (m, 1H), 5.11 – 5.06 (m, 1H), 5.05 – 5.02 (m, 1H), 4.81 (s, 2H), 3.23 (s, 3H), 2.68 – 2.62 (m, 2H), 2.45 (s, 3H), 2.42 – 2.36 (m, 2H).

**$^{13}\text{C}$  NMR (125 MHz,  $\text{CDCl}_3$ )**  $\delta$  175.5, 164.7, 145.3, 136.6, 136.4, 129.9, 128.6, 116.1, 63.3, 36.5, 31.7, 28.3, 21.8.

**HRMS (ESI-TOF)  $m/z$ :** (M+H)<sup>+</sup> calcd. For  $\text{C}_{15}\text{H}_{20}\text{NO}_4\text{S}$ , 310.1113; found, 310.1109.

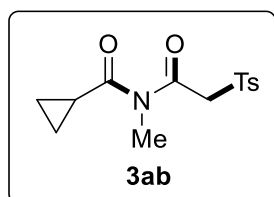

#### ***N*-methyl-*N*-(2-tosylacetyl)cyclopropanecarboxamide**

**3ab:** Colourless oil (39 mg, 66% yield).

**TLC:**  $R_f = 0.21$  (PE: EA = 3:1, v/v).

**$^1\text{H}$  NMR (400 MHz,  $\text{CDCl}_3$ )**  $\delta$  7.82 (d,  $J = 8.0$  Hz, 2H), 7.35 (d,  $J = 8.0$  Hz, 2H), 4.80 (s, 2H), 3.36 (s, 3H), 2.45 (s, 3H), 1.98 – 1.88 (m, 1H), 1.17 – 1.10 (m, 2H), 1.05 – 0.98 (m, 2H).

**$^{13}\text{C}$  NMR (100 MHz,  $\text{CDCl}_3$ )**  $\delta$  177.5, 164.4, 145.2, 136.7, 129.9, 128.7, 62.9, 32.1, 21.8, 15.2, 10.9.

**HRMS (ESI-TOF)  $m/z$ :** (M+H)<sup>+</sup> calcd. For  $\text{C}_{14}\text{H}_{18}\text{NO}_4\text{S}$ , 296.0957; found, 296.0966.

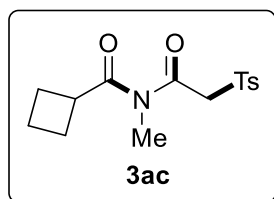

***N*-methyl-*N*-(2-tosylacetyl)cyclobutanecarboxamide**

**3ac:** Colourless oil (31 mg, 50% yield).

**TLC:**  $R_f = 0.28$  (PE: EA = 3:1, v/v).

**$^1\text{H}$  NMR (400 MHz,  $\text{CDCl}_3$ )**  $\delta$  7.82 (d,  $J = 8.0$  Hz, 2H), 7.36 (d,  $J = 8.0$  Hz, 2H), 4.88 (s, 2H), 3.47 – 3.37 (m, 1H), 3.11 (s, 3H), 2.45 (s, 3H), 2.40 – 2.29 (m, 2H), 2.28 – 2.18 (m, 2H), 2.07 – 1.84 (m, 2H).

**$^{13}\text{C}$  NMR (100 MHz,  $\text{CDCl}_3$ )**  $\delta$  177.7, 164.8, 145.2, 136.7, 129.8, 128.6, 63.3, 40.4, 31.2, 25.0, 21.8, 17.6.

**HRMS (ESI-TOF)  $m/z$ :** (M+H)<sup>+</sup> calcd. For  $\text{C}_{15}\text{H}_{20}\text{NO}_4\text{S}$ , 310.1113; found, 310.1112.

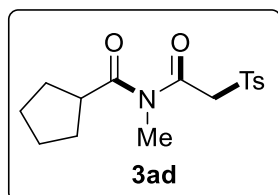

***N*-methyl-*N*-(2-tosylacetyl)cyclopentanecarboxamide**

**3ad:** Colourless oil (44 mg, 68% yield).

**TLC:**  $R_f = 0.36$  (PE: EA = 3:1, v/v).

**$^1\text{H}$  NMR (400 MHz,  $\text{CDCl}_3$ )**  $\delta$  7.82 (d,  $J = 8.0$  Hz, 2H), 7.36 (d,  $J = 8.0$  Hz, 2H), 4.84 (s, 2H), 3.25 (s, 3H), 3.16 – 3.01 (m, 1H), 2.45 (s, 3H), 1.93 – 1.79 (m, 4H), 1.77 – 1.70 (m, 2H), 1.67 – 1.58 (m, 2H).

**$^{13}\text{C}$  NMR (100 MHz,  $\text{CDCl}_3$ )**  $\delta$  179.9, 165.2, 145.2, 136.7, 129.9, 128.7, 63.4, 44.9, 32.0, 30.3, 26.2, 21.8.

**HRMS (ESI-TOF)  $m/z$ :** (M+H)<sup>+</sup> calcd. For  $\text{C}_{16}\text{H}_{22}\text{NO}_4\text{S}$ , 324.1270; found, 324.1268.

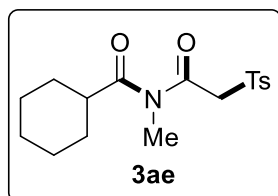

***N*-methyl-*N*-(2-tosylacetyl)cyclohexanecarboxamide**

**3ae:** Colourless oil (38 mg, 57% yield).

**TLC:**  $R_f = 0.43$  (PE: EA = 3:1, v/v).

**$^1\text{H}$  NMR (500 MHz,  $\text{CDCl}_3$ )**  $\delta$  7.84 – 7.80 (m, 2H), 7.36 (d,  $J = 8.0$  Hz, 2H), 4.79 (s, 2H), 3.24 (s, 3H), 2.76 – 2.60 (m, 1H), 2.45 (s, 3H), 1.87 – 1.79 (m, 4H), 1.72 – 1.68 (m, 1H), 1.54 – 1.41 (m, 2H), 1.35 – 1.22 (m, 3H).

**$^{13}\text{C}$  NMR (125 MHz,  $\text{CDCl}_3$ )**  $\delta$  179.7, 165.2, 145.2, 136.6, 129.8, 128.6, 63.2, 44.3, 31.9, 29.2, 25.7, 25.6, 21.8.

**HRMS (ESI-TOF)  $m/z$ :** (M+H)<sup>+</sup> calcd. For  $\text{C}_{17}\text{H}_{24}\text{NO}_4\text{S}$ , 338.1426; found, 338.1428.

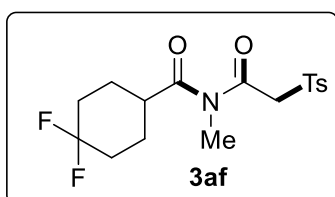

#### 4,4-difluoro-*N*-methyl-*N*-(2-tosylacetyl)cyclohexane-1-carboxamide

**3af:** White solid (67 mg, 90% yield), m. p. 94 – 95 °C.

**TLC:**  $R_f = 0.21$  (PE: EA = 3:1, v/v).

**$^1\text{H}$  NMR (400 MHz,  $\text{CDCl}_3$ )**  $\delta$  7.80 (d,  $J = 8.0$  Hz, 2H), 7.37 (d,  $J = 8.0$  Hz, 2H), 4.72 (s, 2H), 3.27 (s, 3H), 2.98 – 2.81 (m, 1H), 2.46 (s, 3H), 2.24 – 2.13 (m, 2H), 1.99 – 1.68 (m, 6H).

**$^{13}\text{C}$  NMR (100 MHz,  $\text{CDCl}_3$ )**  $\delta$  178.1, 164.9, 145.5, 136.4, 130.0, 128.5, 122.4 (t,  $J = 242.4$  Hz), 63.1, 42.1, 32.8 (t,  $J = 25.3$  Hz), 32.2, 25.6, 25.5, 21.8.

**$^{19}\text{F}$  NMR (376 MHz,  $\text{CDCl}_3$ )**  $\delta$  -93.29 (d,  $J = 237.6$  Hz), -101.45 (d,  $J = 237.6$  Hz).

**HRMS (ESI-TOF)  $m/z$ :** (M+H)<sup>+</sup> calcd. For  $\text{C}_{17}\text{H}_{22}\text{F}_2\text{NO}_4\text{S}$ , 374.1238; found, 374.1233.

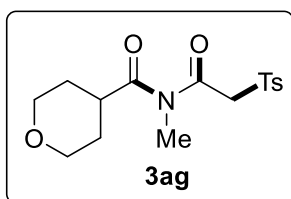

#### *N*-methyl-*N*-(2-tosylacetyl)tetrahydro-2*H*-pyran-4-carboxamide

**3ag:** White solid (62 mg, 92% yield), m. p. 107 – 109 °C.

**TLC:**  $R_f = 0.10$  (PE: EA = 3:1, v/v).

**$^1\text{H}$  NMR (400 MHz,  $\text{CDCl}_3$ )**  $\delta$  7.81 (d,  $J = 8.0$  Hz, 2H), 7.37 (d,  $J = 8.0$  Hz, 2H), 4.75 (s, 2H), 4.05 – 3.99 (m, 2H), 3.50 – 3.39 (m, 2H), 3.27 (s, 3H), 3.09 – 2.99 (m, 1H), 2.46 (s, 3H), 1.91 – 1.80 (m, 2H), 1.77 – 1.70 (m, 2H).

$^{13}\text{C}$  NMR (100 MHz,  $\text{CDCl}_3$ )  $\delta$  178.0, 164.9, 145.4, 136.5, 129.9, 128.5, 67.0, 63.1, 41.7, 32.0, 28.8, 21.8.

HRMS (ESI-TOF)  $m/z$ :  $(\text{M}+\text{H})^+$  calcd. For  $\text{C}_{16}\text{H}_{22}\text{NO}_5\text{S}$ , 340.1219; found, 340.1227.

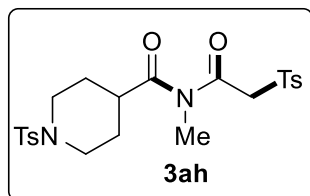

***N*-methyl-1-tosyl-*N*-(2-tosylacetyl)piperidine-4-carboxamide**

**3ah**: White solid (87 mg, 88% yield), m. p. 163 – 164 °C.

TLC:  $R_f$  = 0.15 (PE: EA = 1:1, v/v).

$^1\text{H}$  NMR (400 MHz,  $\text{CDCl}_3$ )  $\delta$  7.77 (d,  $J$  = 8.0 Hz, 2H), 7.63 (d,  $J$  = 8.0 Hz, 2H), 7.38 – 7.31 (m, 4H), 4.64 (s, 2H), 3.84 – 3.73 (m, 2H), 3.20 (s, 3H), 2.83 – 2.70 (m, 1H), 2.44 (s, 6H), 2.41 – 2.30 (m, 2H), 1.93 – 1.77 (m, 4H).

$^{13}\text{C}$  NMR (100 MHz,  $\text{CDCl}_3$ )  $\delta$  177.7, 164.8, 145.6, 143.8, 136.3, 132.9, 130.0, 129.8, 128.4, 127.8, 63.0, 45.5, 41.9, 32.2, 27.8, 21.8, 21.6.

HRMS (ESI-TOF)  $m/z$ :  $(\text{M}+\text{H})^+$  calcd. For  $\text{C}_{23}\text{H}_{29}\text{N}_2\text{O}_6\text{S}_2$ , 493.1467; found, 493.1463.

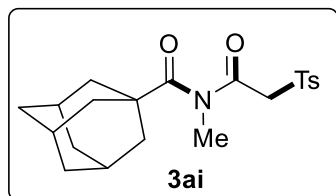

***N*-methyl-*N*-(2-tosylacetyl)adamantane-1-carboxamide**

**3ai**: White solid (43 mg, 56% yield), m. p. 90 – 91 °C.

TLC:  $R_f$  = 0.50 (PE: EA = 3:1, v/v).

$^1\text{H}$  NMR (400 MHz,  $\text{CDCl}_3$ )  $\delta$  7.79 (d,  $J$  = 8.0 Hz, 2H), 7.36 (d,  $J$  = 8.0 Hz, 2H), 4.47 (s, 2H), 3.21 (s, 3H), 2.45 (s, 3H), 2.12 – 2.02 (m, 9H), 1.81 – 1.70 (m, 6H).

$^{13}\text{C}$  NMR (100 MHz,  $\text{CDCl}_3$ )  $\delta$  185.5, 164.5, 145.3, 136.3, 129.9, 128.6, 61.4, 45.3, 39.0, 36.4, 33.2, 28.2, 21.8.

HRMS (ESI-TOF)  $m/z$ :  $(\text{M}+\text{H})^+$  calcd. For  $\text{C}_{21}\text{H}_{28}\text{NO}_4\text{S}$ , 390.1739; found, 390.1739.

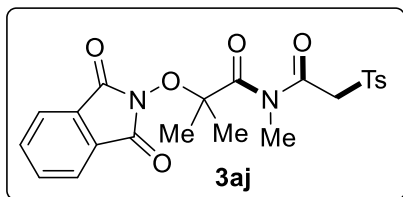

**2-((1,3-dioxoisindolin-2-yl)oxy)-N,2-dimethyl-N-(2-tosylacetyl)propanamide**

**3aj:** White solid (82 mg, 90% yield), m. p. 137 – 138 °C.

**TLC:**  $R_f = 0.21$  (PE: EA = 3:1, v/v).

**$^1\text{H}$  NMR (500 MHz,  $\text{CDCl}_3$ )**  $\delta$  7.87 – 7.77 (m, 6H), 7.36 (d,  $J = 8.0$  Hz, 2H), 4.79 (s, 2H), 3.58 (s, 3H), 2.45 (s, 3H), 1.76 (s, 6H).

**$^{13}\text{C}$  NMR (125 MHz,  $\text{CDCl}_3$ )**  $\delta$  175.3, 165.6, 164.5, 145.3, 136.4, 135.1, 129.9, 128.8, 128.6, 124.0, 89.7, 62.6, 33.6, 23.9, 21.8.

**HRMS (ESI-TOF)  $m/z$ :** ( $\text{M}+\text{H}$ ) $^+$  calcd. For  $\text{C}_{22}\text{H}_{23}\text{N}_2\text{O}_7\text{S}$ , 459.1226; found, 459.1222.

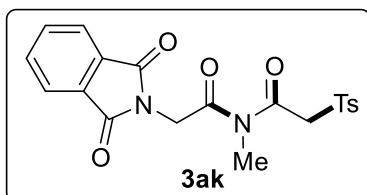

**2-(1,3-dioxoisindolin-2-yl)-N-methyl-N-(2-tosylacetyl)acetamide**

**3ak:** White solid (79 mg, 96% yield), m. p. 177 – 178 °C.

**TLC:**  $R_f = 0.10$  (PE: EA = 3:1, v/v).

**$^1\text{H}$  NMR (400 MHz,  $\text{CDCl}_3$ )**  $\delta$  7.91 – 7.73 (m, 6H), 7.39 (d,  $J = 8.0$  Hz, 2H), 4.74 (s, 2H), 4.60 (s, 2H), 3.35 (s, 3H), 2.46 (s, 3H).

**$^{13}\text{C}$  NMR (100 MHz,  $\text{CDCl}_3$ )**  $\delta$  169.4, 167.7, 165.0, 145.8, 135.8, 134.4, 132.1, 130.1, 128.7, 123.7, 62.8, 43.3, 31.9, 21.8.

**HRMS (ESI-TOF)  $m/z$ :** ( $\text{M}+\text{H}$ ) $^+$  calcd. For  $\text{C}_{20}\text{H}_{19}\text{N}_2\text{O}_6\text{S}$ , 415.0964; found, 415.0962.

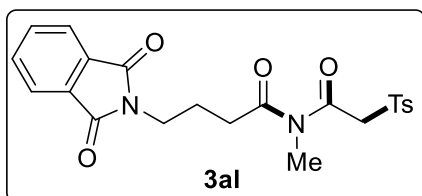

**4-(1,3-dioxoisindolin-2-yl)-N-methyl-N-(2-tosylacetyl)butanamide**

**3al:** White solid (51 mg, 58% yield), m. p. 150 – 151 °C.

**TLC:**  $R_f = 0.10$  (PE: EA = 3:1, v/v).

**<sup>1</sup>H NMR (500 MHz, CDCl<sub>3</sub>)** δ 7.87 – 7.80 (m, 4H), 7.76 – 7.71 (m, 2H), 7.36 (d, *J* = 8.0 Hz, 2H), 4.77 (s, 2H), 3.77 (t, *J* = 6.5 Hz, 2H), 3.20 (s, 3H), 2.62 (t, *J* = 6.5 Hz, 2H), 2.45 (s, 3H), 2.08 – 1.98 (m, 2H).

**<sup>13</sup>C NMR (125 MHz, CDCl<sub>3</sub>)** δ 175.2, 168.6, 164.7, 145.2, 136.7, 134.2, 132.1, 129.9, 128.7, 123.4, 63.2, 37.0, 34.4, 31.7, 23.6, 21.8.

**HRMS (ESI-TOF)** *m/z*: (M+H)<sup>+</sup> calcd. For C<sub>22</sub>H<sub>23</sub>N<sub>2</sub>O<sub>6</sub>S, 443.1277; found, 443.1272.

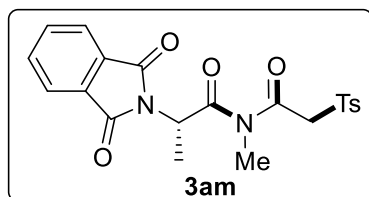

**(S)-2-(1,3-dioxoisindolin-2-yl)-N-methyl-N-(2-tosylacetyl)propanamide**

**3am**: Colourless oil (62 mg, 73% yield). Specific optical rotation: [α]<sup>20</sup><sub>D</sub> = -97.22 (*c* 0.95, CH<sub>3</sub>Cl).

**HPLC**: The *ee* value was determined by HPLC analysis on a CHIRALPAK AD-H column (hexane/isopropanol = 55/45, flow = 1.0 mL/min, 254 nm) with *t<sub>r</sub>* = 22.7 min (minor), 27.5 min (major): > 99% *ee*.

**TLC**: *R<sub>f</sub>* = 0.10 (PE: EA = 3:1, v/v).

**<sup>1</sup>H NMR (500 MHz, CDCl<sub>3</sub>)** δ 7.89 – 7.85 (m, 2H), 7.83 (d, *J* = 8.0 Hz, 2H), 7.79 – 7.75 (m, 2H), 7.34 (d, *J* = 8.0 Hz, 2H), 5.32 (q, *J* = 7.0 Hz, 1H), 4.76 (d, *J* = 15.0 Hz, 1H), 4.51 (d, *J* = 15.0 Hz, 1H), 3.13 (s, 3H), 2.44 (s, 3H), 1.62 (d, *J* = 7.0 Hz, 3H).

**<sup>13</sup>C NMR (125 MHz, CDCl<sub>3</sub>)** δ 173.7, 167.3, 165.0, 145.2, 136.8, 134.7, 131.6, 129.8, 128.7, 123.9, 62.2, 49.6, 32.1, 21.8, 15.4.

**HRMS (ESI-TOF)** *m/z*: (M+H)<sup>+</sup> calcd. For C<sub>21</sub>H<sub>21</sub>N<sub>2</sub>O<sub>6</sub>S, 429.1120; found, 429.1122.

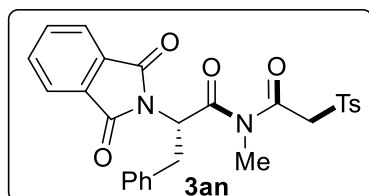

**(S)-2-(1,3-dioxoisindolin-2-yl)-N-methyl-3-phenyl-N-(2-tosylacetyl)propanamide**

**3an**: Colourless oil (61 mg, 61% yield). Specific optical rotation: [α]<sup>20</sup><sub>D</sub> = -162.32 (*c* 0.75, CH<sub>3</sub>Cl).

**HPLC**: The *ee* value was determined by HPLC analysis on a CHIRALPAK AD-H column (hexane/isopropanol = 55/45, flow = 1.0 mL/min, 254 nm) with *t<sub>r</sub>* = 20.6 min (major), 30.5 min (minor): > 99% *ee*.



**TLC:**  $R_f = 0.10$  (PE: EA = 3:1, v/v).

**$^1\text{H}$  NMR (500 MHz,  $\text{CDCl}_3$ )**  $\delta$  7.87 – 7.81 (m, 2H), 7.80 – 7.75 (m, 2H), 7.73 – 7.69 (m, 2H), 7.32 (d,  $J = 8.0$  Hz, 2H), 7.20 – 7.12 (m, 5H), 5.54 (dd,  $J_1 = 9.5$  Hz,  $J_2 = 5.5$  Hz, 1H), 4.76 (d,  $J = 15.0$  Hz, 1H), 4.52 (d,  $J = 15.0$  Hz, 1H), 3.49 – 3.37 (m, 2H), 3.15 (s, 3H), 2.41 (s, 3H).

**$^{13}\text{C}$  NMR (125 MHz,  $\text{CDCl}_3$ )**  $\delta$  172.9, 167.4, 165.0, 145.3, 136.5, 136.3, 134.6, 131.3, 129.9, 129.2, 128.8, 128.7, 127.2, 123.8, 62.3, 55.8, 34.8, 32.3, 21.8.

**HRMS (ESI-TOF)**  $m/z$ :  $(\text{M}+\text{H})^+$  calcd. For  $\text{C}_{27}\text{H}_{25}\text{N}_2\text{O}_6\text{S}$ , 505.1433; found, 505.1435.

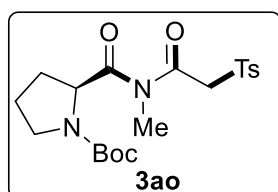

**tert-butyl (S)-2-(methyl(2-tosylacetyl)carbamoyl)pyrrolidine-1-carboxylate**

**3ao:** Colourless oil (80 mg, 94% yield). Specific optical rotation:  $[\alpha]^{20}_D = -37.99$  ( $c$  0.8,  $\text{CH}_3\text{Cl}$ ).

**HPLC:** The *ee* value was determined by HPLC analysis on a CHIRALPAK AD-H column (hexane/isopropanol = 55/45, flow = 1.0 mL/min, 254 nm) with  $t_r = 6.0$  min (minor), 9.7 min (major): > 99% *ee*.

**TLC:**  $R_f = 0.14$  (PE: EA = 3:1, v/v).

**$^1\text{H}$  NMR (400 MHz,  $\text{CDCl}_3$ , 2 rotamers see, ratio = 6:4)**  $\delta$  7.82 (d,  $J = 8.4$  Hz, 2H), 7.43 – 7.31 (m, 2H), 5.16 (d,  $J = 14.4$  Hz, 0.6H), 5.03 (d,  $J = 14.4$  Hz, 0.4H), 4.83 – 4.71 (m, 1H), 4.51 (d,  $J = 14.4$  Hz, 0.4H), 4.40 (d,  $J = 14.4$  Hz, 0.6H), 3.66 – 3.55 (m, 1H), 3.52 – 3.39 (m, 1H), 3.33 and 3.30 (two single peaks, 3H), 2.46 and 2.45 (two single peaks, 3H), 2.35 – 2.20 (m, 1H), 2.06 – 1.87 (m, 3H), 1.45 and 1.38 (two single peaks, 9H)

**$^{13}\text{C}$  NMR (100 MHz,  $\text{CDCl}_3$ , 2 rotamers see)**  $\delta$  176.2, 176.1, 164.7, 154.5, 153.4, 145.4, 145.2, 136.4 (136.43), 136.4 (136.41), 129.9, 129.8, 128.6, 128.5, 80.1 (80.13), 80.1 (80.10), 63.0 (63.03), 63.0 (62.98), 60.0, 59.9, 46.9, 46.7, 31.7, 31.6, 30.3, 29.4, 28.5, 28.3, 24.1, 23.2, 21.7.

**HRMS (ESI-TOF)**  $m/z$ :  $(\text{M}+\text{H})^+$  calcd. For  $\text{C}_{20}\text{H}_{29}\text{N}_2\text{O}_6\text{S}$ , 425.1746; found, 425.1745.

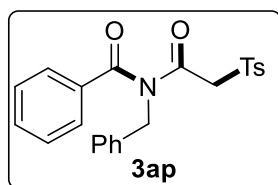

**N-benzyl-N-(2-tosylacetyl)benzamide**

**3ap:** White solid (71 mg, 87% yield), m. p. 114 – 115 °C.

**TLC:**  $R_f = 0.43$  (PE: EA = 3:1, v/v).

**$^1\text{H}$  NMR (500 MHz,  $\text{CDCl}_3$ )**  $\delta$  7.74 (d,  $J = 8.5$  Hz, 2H), 7.62 – 7.53 (m, 3H), 7.46 – 7.41 (m, 2H), 7.32 (d,  $J = 8.5$  Hz, 2H), 7.25 – 7.19 (m, 3H), 7.10 – 7.06 (m, 2H), 4.94 (s, 2H), 4.59 (s, 2H), 2.43 (s, 3H).

**$^{13}\text{C}$  NMR (125 MHz,  $\text{CDCl}_3$ )**  $\delta$  174.7, 164.6, 145.4, 136.2, 136.1, 134.3, 133.0, 130.0, 129.0, 128.9, 128.6, 128.5, 127.9, 127.8, 62.4, 50.5, 21.8.

**HRMS (ESI-TOF)  $m/z$ :** (M+H)<sup>+</sup> calcd. For  $\text{C}_{23}\text{H}_{22}\text{NO}_4\text{S}$ , 408.1270; found, 408.1270.

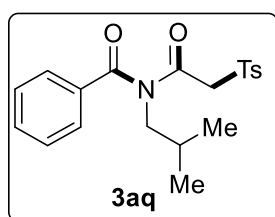

#### ***N*-isobutyl-*N*-(2-tosylacetyl)benzamide**

**3aq:** White solid (58 mg, 78% yield), m. p. 123 – 124 °C.

**TLC:**  $R_f = 0.57$  (PE: EA = 3:1, v/v).

**$^1\text{H}$  NMR (400 MHz,  $\text{CDCl}_3$ )**  $\delta$  7.83 – 7.75 (m, 2H), 7.71 – 7.66 (m, 2H), 7.62 – 7.57 (m, 1H), 7.52 – 7.46 (m, 2H), 7.35 (d,  $J = 8.0$  Hz, 2H), 4.60 (s, 2H), 3.57 (d,  $J = 6.8$  Hz, 2H), 2.45 (s, 3H), 2.01 – 1.83 (m, 1H), 0.76 (d,  $J = 6.8$  Hz, 6H).

**$^{13}\text{C}$  NMR (100 MHz,  $\text{CDCl}_3$ )**  $\delta$  175.4, 164.4, 145.4, 136.3, 134.2, 133.1, 130.0, 129.3, 129.0, 128.5, 62.0, 55.0, 28.5, 21.8, 20.1.

**HRMS (ESI-TOF)  $m/z$ :** (M+H)<sup>+</sup> calcd. For  $\text{C}_{20}\text{H}_{24}\text{NO}_4\text{S}$ , 374.1426; found, 374.1442.

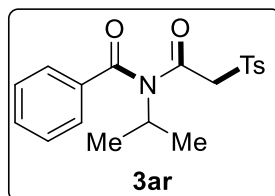

#### ***N*-isopropyl-*N*-(2-tosylacetyl)benzamide**

**3ar:** White solid (60 mg, 83% yield), m. p. 113 – 115 °C.

**TLC:**  $R_f = 0.50$  (PE: EA = 3:1, v/v).

**$^1\text{H}$  NMR (400 MHz,  $\text{CDCl}_3$ )**  $\delta$  7.79 – 7.72 (m, 4H), 7.64 – 7.58 (m, 1H), 7.53 – 7.47 (m, 2H), 7.35 (d,  $J = 8.0$  Hz, 2H), 4.36 – 4.22 (m, 3H), 2.45 (s, 3H), 1.38 (d,  $J = 6.8$  Hz, 6H).

$^{13}\text{C}$  NMR (100 MHz,  $\text{CDCl}_3$ )  $\delta$  175.3, 164.3, 145.4, 136.1, 135.0, 133.4, 129.9, 129.2, 129.1, 128.5, 63.0, 52.6, 21.8, 20.0.

HRMS (ESI-TOF)  $m/z$ :  $(\text{M}+\text{H})^+$  calcd. For  $\text{C}_{19}\text{H}_{22}\text{NO}_4\text{S}$ , 360.1270; found, 360.1279.

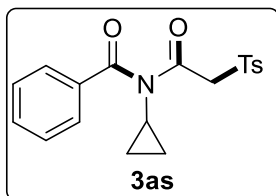

### *N*-cyclopropyl-*N*-(2-tosylacetyl)benzamide

**3as**: White solid (56 mg, 78% yield), m. p. 91 – 92 °C.

TLC:  $R_f$  = 0.28 (PE: EA = 3:1, v/v).

$^1\text{H}$  NMR (500 MHz,  $\text{CDCl}_3$ )  $\delta$  7.84 – 7.80 (m, 2H), 7.79 – 7.75 (m, 2H), 7.61 – 7.56 (m, 1H), 7.50 – 7.45 (m, 2H), 7.34 (d,  $J$  = 8.0 Hz, 2H), 4.73 (s, 2H), 2.88 – 2.79 (m, 1H), 2.43 (s, 3H), 0.87 – 0.76 (m, 2H), 0.55 – 0.47 (m, 2H).

$^{13}\text{C}$  NMR (125 MHz,  $\text{CDCl}_3$ )  $\delta$  174.3, 164.6, 145.4, 136.4, 134.7, 133.1, 130.0, 129.25, 128.7, 128.6, 61.5, 30.3, 21.8, 10.1.

HRMS (ESI-TOF)  $m/z$ :  $(\text{M}+\text{H})^+$  calcd. For  $\text{C}_{19}\text{H}_{20}\text{NO}_4\text{S}$ , 358.1113; found, 358.1124.

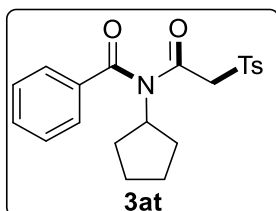

### *N*-cyclopentyl-*N*-(2-tosylacetyl)benzamide

**3at**: White solid (75 mg, 97% yield), m. p. 99 – 100 °C.

TLC:  $R_f$  = 0.57 (PE: EA = 3:1, v/v).

$^1\text{H}$  NMR (500 MHz,  $\text{CDCl}_3$ )  $\delta$  7.82 – 7.73 (m, 4H), 7.64 – 7.59 (m, 1H), 7.55 – 7.47 (m, 2H), 7.35 (d,  $J$  = 8.0 Hz, 2H), 4.45 (s, 2H), 4.24 – 4.14 (m, 1H), 2.44 (s, 3H), 2.10 – 1.97 (m, 2H), 1.90 – 1.74 (m, 4H), 1.49 – 1.38 (m, 2H).

$^{13}\text{C}$  NMR (125 MHz,  $\text{CDCl}_3$ )  $\delta$  175.6, 163.6, 145.3, 136.3, 134.5, 133.4, 129.9, 129.4, 129.0, 128.5, 62.6, 61.4, 29.2, 25.3, 21.8.

HRMS (ESI-TOF)  $m/z$ :  $(\text{M}+\text{H})^+$  calcd. For  $\text{C}_{21}\text{H}_{24}\text{NO}_4\text{S}$ , 386.1426; found, 386.1440.

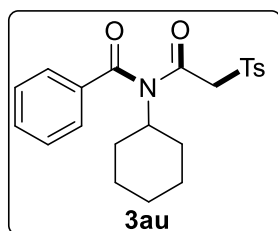

***N*-cyclohexyl-*N*-(2-tosylacetyl)benzamide**

**3au:** White solid (74 mg, 93% yield), m. p. 99 – 100 °C.

**TLC:**  $R_f = 0.58$  (PE: EA = 3:1, v/v).

**$^1\text{H}$  NMR (500 MHz,  $\text{CDCl}_3$ )**  $\delta$  7.79 – 7.73 (m, 4H), 7.64 – 7.59 (m, 1H), 7.53 – 7.47 (m, 2H), 7.35 (d,  $J = 8.0$  Hz, 2H), 4.23 (s, 2H), 4.01 – 3.87 (m, 1H), 2.44 (s, 3H), 2.07 – 1.93 (m, 2H), 1.80 – 1.71 (m, 4H), 1.58 – 1.49 (m, 1H), 1.21 – 1.06 (m, 3H).

**$^{13}\text{C}$  NMR (125 MHz,  $\text{CDCl}_3$ )**  $\delta$  175.1, 164.0, 145.3, 136.0, 135.1, 133.6, 129.9, 129.3, 129.2, 128.6, 63.0, 60.4, 29.8, 26.3, 25.1, 21.8.

**HRMS (ESI-TOF)**  $m/z$ :  $(\text{M}+\text{H})^+$  calcd. For  $\text{C}_{22}\text{H}_{26}\text{NO}_4\text{S}$ , 400.1583; found, 400.1590.

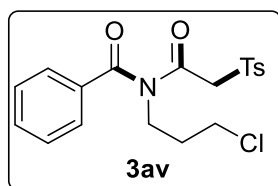

***N*-(3-chloropropyl)-*N*-(2-tosylacetyl)benzamide**

**3av:** White solid (63 mg, 80% yield), m. p. 119 – 120 °C.

**TLC:**  $R_f = 0.36$  (PE: EA = 3:1, v/v).

**$^1\text{H}$  NMR (500 MHz,  $\text{CDCl}_3$ )**  $\delta$  7.80 – 7.77 (m, 2H), 7.70 – 7.66 (m, 2H), 7.63 – 7.59 (m, 1H), 7.53 – 7.48 (m, 2H), 7.36 (d,  $J = 8.0$  Hz, 2H), 4.58 (s,  $J = 7.0$  Hz, 2H), 3.85 (t, 2H), 3.45 (t,  $J = 6.0$  Hz, 2H), 2.45 (s, 3H), 2.08 – 1.99 (m, 2H).

**$^{13}\text{C}$  NMR (125 MHz,  $\text{CDCl}_3$ )**  $\delta$  174.7, 164.7, 145.5, 136.2, 133.8, 133.2, 130.0, 129.1, 129.0, 128.5, 62.2, 45.5, 42.0, 31.2, 21.8.

**HRMS (ESI-TOF)**  $m/z$ :  $(\text{M}+\text{H})^+$  calcd. For  $\text{C}_{19}\text{H}_{21}\text{ClNO}_4\text{S}$ , 394.0880; found, 394.0873.

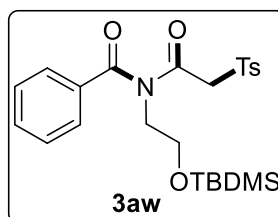

***N*-2-((*tert*-butyldimethylsilyloxy)ethyl)-*N*-(2-tosylacetyl)benzamide**

**3aw:** White solid (60 mg, 63% yield), m. p. 83 – 84 °C.

**TLC:**  $R_f = 0.64$  (PE: EA = 3:1, v/v).

**$^1\text{H}$  NMR (400 MHz,  $\text{CDCl}_3$ )**  $\delta$  7.80 (d,  $J = 8.0$  Hz, 2H), 7.71 – 7.66 (m, 2H), 7.59 – 7.53 (m, 1H), 7.49 – 7.44 (m, 2H), 7.35 (d,  $J = 8.0$  Hz, 2H), 4.65 (s, 2H), 3.90 (t,  $J = 5.2$  Hz, 2H), 3.70 (t,  $J = 5.2$  Hz, 2H), 2.44 (s, 3H), 0.79 (s, 9H), -0.05 (s, 6H).

**$^{13}\text{C}$  NMR (100 MHz,  $\text{CDCl}_3$ )**  $\delta$  174.8, 164.7, 145.4, 136.3, 134.2, 132.7, 130.0, 129.4, 128.8, 128.5, 61.9, 61.3, 50.2, 25.9, 21.8, 18.4, -5.5.

**HRMS (ESI-TOF)**  $m/z$ : ( $\text{M}+\text{H}$ )<sup>+</sup> calcd. For  $\text{C}_{24}\text{H}_{34}\text{NO}_5\text{SSi}$ , 476.1927; found, 476.1930.

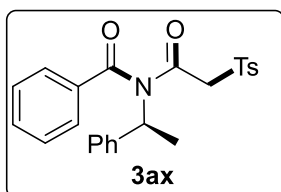

***(S)*-*N*-(1-phenylethyl)-*N*-(2-tosylacetyl)benzamide**

**3ax:** White solid (67 mg, 80% yield), m. p. 141 – 142 °C, Specific optical rotation:  $[\alpha]^{20}_D = -14.44$  ( $c$  0.5,  $\text{CH}_3\text{Cl}$ ).

**HPLC:** The *ee* value was determined by HPLC analysis on a CHIRALPAK AD-H column (hexane/isopropanol = 55/45, flow = 1.0 mL/min, 254 nm) with  $t_r = 12.4$  min (major), 15.0 min (minor): > 95% *ee*.

**TLC:**  $R_f = 0.43$  (PE: EA = 3:1, v/v).

**$^1\text{H}$  NMR (500 MHz,  $\text{CDCl}_3$ )**  $\delta$  7.71 – 7.67 (m, 2H), 7.65 – 7.62 (m, 2H), 7.60 – 7.56 (m, 1H), 7.49 – 7.43 (m, 2H), 7.35 – 7.67 (m, 2H), 7.30 – 7.26 (m, 4H), 7.25 – 7.20 (m, 1H), 5.54 (q,  $J = 7.5$  Hz, 1H), 4.35 (d,  $J = 14.0$  Hz, 1H), 4.13 (d,  $J = 14.0$  Hz, 1H), 2.43 (s, 3H), 1.78 (d,  $J = 7.5$  Hz, 3H).

**$^{13}\text{C}$  NMR (125 MHz,  $\text{CDCl}_3$ )**  $\delta$  175.0, 164.0, 145.4, 139.8, 135.9, 135.4, 133.4, 129.9, 129.2, 129.1, 128.6, 128.4, 127.6, 127.5, 63.2, 57.4, 21.8, 17.4.

**HRMS (ESI-TOF)**  $m/z$ : ( $\text{M}+\text{H}$ )<sup>+</sup> calcd. For  $\text{C}_{24}\text{H}_{24}\text{NO}_4\text{S}$ , 422.1426; found, 422.1422.

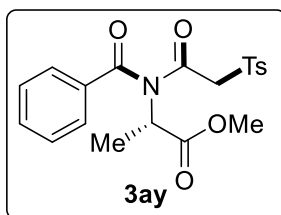

**methyl *N*-benzoyl-*N*-(2-tosylacetyl)-*L*-alaninate**

**3ay**: Colourless oil (44 mg, 55% yield). Specific optical rotation:  $[\alpha]^{20}_D = -19.08$  ( $c$  0.5,  $\text{CH}_3\text{Cl}$ ).

**HPLC**: The *ee* value was determined by HPLC analysis on a CHIRALPAK AD-H column (hexane/isopropanol = 55/45, flow = 1.0 mL/min, 254 nm) with  $t_r = 11.2$  min (major), 11.9 min (minor): 99% *ee*.

**TLC**:  $R_f = 0.28$  (PE: EA = 3:1, v/v).

**$^1\text{H}$  NMR (400 MHz,  $\text{CDCl}_3$ )**  $\delta$  7.81 – 7.75 (m, 4H), 7.65 – 7.60 (m, 1H), 7.55 – 7.49 (m, 2H), 7.35 (d,  $J = 8.0$  Hz, 2H), 4.67 (q,  $J = 6.8$  Hz, 1H), 4.50 (d,  $J = 14.0$  Hz, 1H), 4.30 (d,  $J = 14.0$  Hz, 1H), 3.71 (s, 3H), 2.44 (s, 3H), 1.56 (d,  $J = 6.8$  Hz, 3H).

**$^{13}\text{C}$  NMR (100 MHz,  $\text{CDCl}_3$ )**  $\delta$  173.9, 170.4, 164.3, 145.6, 136.0, 134.3, 133.5, 130.0, 129.4, 129.0, 128.6, 62.6, 56.5, 52.8, 21.8, 14.7.

**HRMS (ESI-TOF)**  $m/z$ :  $(\text{M}+\text{H})^+$  calcd. For  $\text{C}_{20}\text{H}_{22}\text{NO}_6\text{S}$ , 404.1168; found, 404.1174.

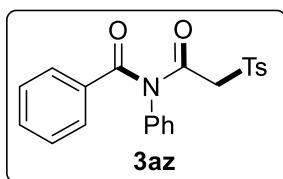

***N*-phenyl-*N*-(2-tosylacetyl)benzamide**

**3az**: White solid (56 mg, 72% yield), m. p. 127 – 128 °C.

**TLC**:  $R_f = 0.36$  (PE: EA = 3:1, v/v).

**$^1\text{H}$  NMR (500 MHz,  $\text{CDCl}_3$ )**  $\delta$  7.87 – 7.83 (m, 2H), 7.67 – 7.63 (m, 2H), 7.42 – 7.37 (m, 1H), 7.36 – 7.22 (m, 7H), 7.18 – 7.12 (m, 2H), 4.75 (s, 2H), 2.42 (s, 3H).

**$^{13}\text{C}$  NMR (125 MHz,  $\text{CDCl}_3$ )**  $\delta$  173.1, 165.3, 145.5, 138.6, 136.4, 133.7, 132.6, 130.0, 129.9, 129.6, 128.6, 128.5, 128.3, 62.2, 21.8.

**HRMS (ESI-TOF)**  $m/z$ :  $(\text{M}+\text{H})^+$  calcd. For  $\text{C}_{22}\text{H}_{20}\text{NO}_4\text{S}$ , 394.1113; found, 394.1110.

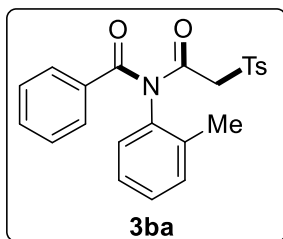

***N*-(*o*-tolyl)-*N*-(2-tosylacetyl)benzamide**

**3ba**: White solid (55 mg, 68% yield), m. p. 140 – 141 °C.

**TLC:**  $R_f = 0.43$  (PE: EA = 3:1, v/v).

**$^1\text{H}$  NMR (400 MHz,  $\text{CDCl}_3$ )**  $\delta$  7.83 (d,  $J = 8.0$  Hz, 2H), 7.66 (d,  $J = 7.6$  Hz, 2H), 7.45 – 7.39 (m, 1H), 7.35 – 7.28 (m, 4H), 7.23 – 7.10 (m, 4H), 4.74 (d,  $J = 14.4$  Hz, 1H), 4.63 (d,  $J = 14.4$  Hz, 1H), 2.42 (s, 3H), 2.25 (s, 3H).

**$^{13}\text{C}$  NMR (100 MHz,  $\text{CDCl}_3$ )**  $\delta$  173.0, 165.0, 145.4, 137.4, 136.4, 136.3, 134.0, 132.5, 131.7, 130.0, 129.4, 129.3, 129.2, 128.7, 128.3, 127.3, 62.2, 21.8, 18.2.

**HRMS (ESI-TOF)  $m/z$ :** (M+H)<sup>+</sup> calcd. For  $\text{C}_{23}\text{H}_{22}\text{NO}_4\text{S}$ , 408.1270; found, 408.1270.

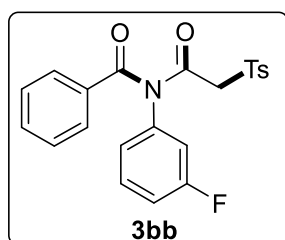

***N*-(3-fluorophenyl)-*N*-(2-tosylacetyl)benzamide**

**3bb:** White solid (37 mg, 45% yield), m. p. 143 – 144 °C.

**TLC:**  $R_f = 0.43$  (PE: EA = 3:1, v/v).

**$^1\text{H}$  NMR (500 MHz,  $\text{CDCl}_3$ )**  $\delta$  7.85 (d,  $J = 8.5$  Hz, 2H), 7.68 – 7.62 (m, 2H), 7.46 – 7.41 (m, 1H), 7.37 (d,  $J = 8.0$  Hz, 2H), 7.34 – 7.23 (m, 3H), 7.00 – 6.87 (m, 3H), 4.76 (s, 2H), 2.44 (s, 3H).

**$^{13}\text{C}$  NMR (125 MHz,  $\text{CDCl}_3$ )**  $\delta$  172.8, 165.3, 162.9 (d,  $J = 248.9$  Hz), 145.7, 139.9 (d,  $J = 9.8$  Hz), 136.3, 133.3, 132.9, 130.7 (d,  $J = 9.0$  Hz), 130.1, 129.9, 128.6, 128.5, 124.4 (d,  $J = 3.3$  Hz), 116.0 (d,  $J = 23.3$  Hz), 115.8 (d,  $J = 21.0$  Hz), 62.3, 21.8.

**$^{19}\text{F}$  NMR (376 MHz,  $\text{CDCl}_3$ )**  $\delta$  -110.95.

**HRMS (ESI-TOF)  $m/z$ :** (M+H)<sup>+</sup> calcd. For  $\text{C}_{22}\text{H}_{19}\text{FNO}_4\text{S}$ , 412.1019; found, 412.1014.

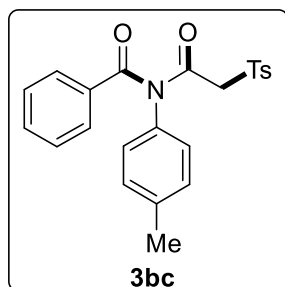

***N*-(*p*-tolyl)-*N*-(2-tosylacetyl)benzamide**

**3bc:** White solid (57 mg, 70% yield), m. p. 146 – 147 °C.

**TLC:**  $R_f = 0.40$  (PE: EA = 3:1, v/v).

**<sup>1</sup>H NMR (400 MHz, CDCl<sub>3</sub>)** δ 7.84 (d, *J* = 7.6 Hz, 2H), 7.66 (d, *J* = 7.6 Hz, 2H), 7.44 – 7.37 (m, 1H), 7.36 – 7.24 (m, 4H), 7.14 – 7.08 (m, 2H), 7.05 – 7.00 (m, 2H), 4.72 (s, 2H), 2.41 (s, 3H), 2.28 (s, 3H).

**<sup>13</sup>C NMR (100 MHz, CDCl<sub>3</sub>)** δ 173.1, 165.4, 145.4, 138.7, 136.4, 135.8, 133.8, 132.5, 130.3, 130.0, 129.9, 128.6, 128.3, 128.2, 62.2, 21.8, 21.2.

**HRMS (ESI-TOF)** *m/z*: (M+H)<sup>+</sup> calcd. For C<sub>23</sub>H<sub>22</sub>NO<sub>4</sub>S, 408.1270; found, 408.1278.

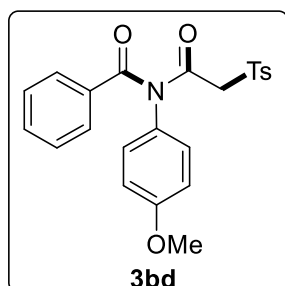

#### *N*-(4-methoxyphenyl)-*N*-(2-tosylacetyl)benzamide

**3bd**: Colourless gum (68 mg, 80% yield).

**TLC**: R<sub>f</sub> = 0.25 (PE: EA = 3:1, v/v).

**<sup>1</sup>H NMR (400 MHz, CDCl<sub>3</sub>)** δ 7.88 (d, *J* = 8.4 Hz, 2H), 7.76 – 7.66 (m, 2H), 7.48 – 7.41 (m, 1H), 7.39 – 7.28 (m, 4H), 7.14 – 7.08 (m, 2H), 6.89 – 6.82 (m, 2H), 4.75 (s, 2H), 3.78 (s, 3H), 2.46 (s, 3H).

**<sup>13</sup>C NMR (100 MHz, CDCl<sub>3</sub>)** δ 173.1, 165.5, 159.4, 145.5, 136.4, 133.8, 132.5, 131.1, 130.0, 129.8, 129.6, 128.6, 128.4, 114.9, 62.1, 55.5, 21.8.

**HRMS (ESI-TOF)** *m/z*: (M+H)<sup>+</sup> calcd. For C<sub>23</sub>H<sub>22</sub>NO<sub>5</sub>S, 424.1219; found, 422.1233.

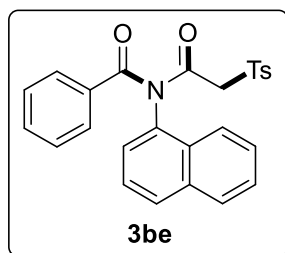

#### *N*-(naphthalen-1-yl)-*N*-(2-tosylacetyl)benzamide

**3be**: White solid (47 mg, 53% yield), m. p. 179 – 180 °C.

**TLC**: R<sub>f</sub> = 0.36 (PE: EA = 3:1, v/v).

**<sup>1</sup>H NMR (500 MHz, CDCl<sub>3</sub>)** δ 8.04 (d, *J* = 8.5 Hz, 1H), 7.88 – 7.79 (m, 4H), 7.73 – 7.68 (m, 2H), 7.65 – 7.59 (m, 1H), 7.56 – 7.51 (m, 1H), 7.41 – 7.29 (m, 5H), 7.25 – 7.19 (m, 2H), 4.79 (d, *J* = 14.0 Hz, 1H), 4.60 (d, *J* = 14.0 Hz, 1H), 2.41 (s, 3H).



$^{13}\text{C}$  NMR (125 MHz,  $\text{CDCl}_3$ )  $\delta$  173.6, 165.3, 145.5, 136.3, 134.8, 134.6, 134.0, 132.7, 130.5, 130.1, 130.0, 129.0, 128.8, 128.7, 128.3, 128.1, 127.5, 126.9, 125.5, 122.5, 62.3, 21.8.

HRMS (ESI-TOF)  $m/z$ :  $(\text{M}+\text{H})^+$  calcd. For  $\text{C}_{26}\text{H}_{22}\text{NO}_4\text{S}$ , 444.1270; found, 444.1272.

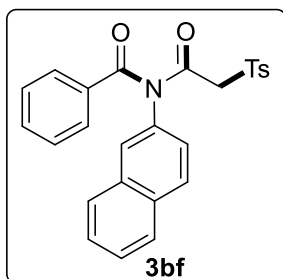

***N*-(naphthalen-2-yl)-*N*-(2-tosylacetyl)benzamide**

**3bf**: White solid (59 mg, 67% yield), m. p. 137 – 138 °C.

TLC:  $R_f$  = 0.36 (PE: EA = 3:1, v/v).

$^1\text{H}$  NMR (500 MHz,  $\text{CDCl}_3$ )  $\delta$  7.87 (d,  $J$  = 8.0 Hz, 2H), 7.83 (d,  $J$  = 8.5 Hz, 1H), 7.81 – 7.77 (m, 1H), 7.73 – 7.68 (m, 3H), 7.52 (d,  $J$  = 1.5 Hz, 1H), 7.50 – 7.42 (m, 2H), 7.39 – 7.32 (m, 4H), 7.28 – 7.22 (m, 2H), 4.79 (s, 2H), 2.42 (s, 3H).

$^{13}\text{C}$  NMR (125 MHz,  $\text{CDCl}_3$ )  $\delta$  173.2, 165.5, 145.6, 136.4, 136.0, 133.6, 133.4, 132.7, 132.7, 130.1, 130.0, 129.8, 128.6, 128.4, 128.1, 127.9, 127.4, 127.2, 126.9, 125.9, 62.3, 21.8.

HRMS (ESI-TOF)  $m/z$ :  $(\text{M}+\text{H})^+$  calcd. For  $\text{C}_{26}\text{H}_{22}\text{NO}_4\text{S}$ , 444.1270; found, 444.1272.

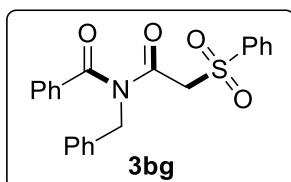

***N*-benzyl-*N*-(2-(phenylsulfonyl)acetyl)benzamide**

**3bg**: White solid (68 mg, 87% yield), m. p. 113 – 114 °C.

TLC:  $R_f$  = 0.35 (PE: EA = 3:1, v/v).

$^1\text{H}$  NMR (500 MHz,  $\text{CDCl}_3$ )  $\delta$  7.91 – 7.84 (m, 2H), 7.69 – 7.63 (m, 1H), 7.62 – 7.51 (m, 5H), 7.49 – 7.42 (m, 2H), 7.26 – 7.20 (m, 3H), 7.11 – 7.04 (m, 2H), 4.94 (s, 2H), 4.62 (s, 2H).

$^{13}\text{C}$  NMR (125 MHz,  $\text{CDCl}_3$ )  $\delta$  174.7, 164.5, 139.1, 136.2, 134.3 (134.32), 134.3 (134.29), 133.1, 129.4, 129.0, 128.9, 128.7, 128.5, 127.9, 127.8, 62.3, 50.6.

HRMS (ESI-TOF)  $m/z$ :  $(\text{M}+\text{H})^+$  calcd. For  $\text{C}_{22}\text{H}_{20}\text{NO}_4\text{S}$ , 394.1113; found, 394.1115.

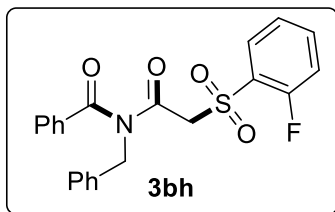

***N*-benzyl-*N*-(2-((2-fluorophenyl)sulfonyl)acetyl)benzamide**

**3bh:** Colourless oil (28 mg, 34% yield).

**TLC:**  $R_f = 0.36$  (PE: EA = 3:1, v/v).

**$^1\text{H}$  NMR (500 MHz,  $\text{CDCl}_3$ )**  $\delta$  7.90 – 7.85 (m, 1H), 7.69 – 7.55 (m, 4H), 7.48 – 7.43 (m, 2H), 7.34 – 7.29 (m, 1H), 7.27 – 7.19 (m, 4H), 7.08 – 7.02 (m, 2H), 4.91 (s, 2H), 4.78 (s, 2H).

**$^{13}\text{C}$  NMR (125 MHz,  $\text{CDCl}_3$ )**  $\delta$  174.6, 164.5, 159.7 (d,  $J = 256.1$  Hz), 136.8 (d,  $J = 8.6$  Hz), 136.2, 134.2, 133.2, 130.7, 129.1, 129.0, 128.7, 127.9, 127.8, 127.0 (d,  $J = 14.2$  Hz), 124.9 (d,  $J = 3.7$  Hz), 117.3 (d,  $J = 21.1$  Hz), 61.7 (d,  $J = 2.6$  Hz), 50.5.

**$^{19}\text{F}$  NMR (376 MHz,  $\text{CDCl}_3$ )**  $\delta$  -109.44.

**HRMS (ESI-TOF)  $m/z$ :** (M+H)<sup>+</sup> calcd. For  $\text{C}_{22}\text{H}_{19}\text{FNO}_4\text{S}$ , 412.1019; found, 412.1030.

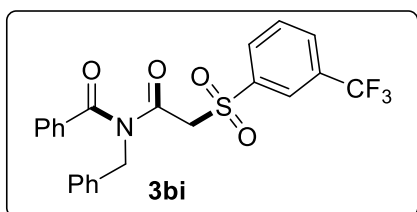

***N*-benzyl-*N*-(2-((3-(trifluoromethyl)phenyl)sulfonyl)acetyl)benzamide**

**3bi:** White solid (60 mg, 65% yield), m. p. 80 – 81 °C.

**TLC:**  $R_f = 0.43$  (PE: EA = 3:1, v/v).

**$^1\text{H}$  NMR (500 MHz,  $\text{CDCl}_3$ )**  $\delta$  8.19 (s, 1H), 8.06 (d,  $J = 9.0$  Hz, 1H), 7.91 (d,  $J = 8.0$  Hz, 1H), 7.72 – 7.66 (m, 1H), 7.63 – 7.57 (m, 3H), 7.49 – 7.43 (m, 2H), 7.26 – 7.21 (m, 3H), 7.09 – 7.02 (m, 2H), 4.94 (s, 2H), 4.66 (s, 2H).

**$^{13}\text{C}$  NMR (125 MHz,  $\text{CDCl}_3$ )**  $\delta$  174.6, 164.3, 140.3, 136.0, 134.0, 133.3, 132.2, 132.0 (q,  $J = 33.7$  Hz), 131.0 (q,  $J = 3.4$  Hz), 130.2, 129.1, 128.9, 128.8, 127.9, 127.8, 125.8 (q,  $J = 3.8$  Hz), 123.2 (q,  $J = 273.0$  Hz), 62.3, 50.6.

**$^{19}\text{F}$  NMR (376 MHz,  $\text{CDCl}_3$ )**  $\delta$  -110.95.

**HRMS (ESI-TOF)  $m/z$ :** (M+H)<sup>+</sup> calcd. For  $\text{C}_{23}\text{H}_{19}\text{F}_3\text{NO}_4\text{S}$ , 462.0987; found, 462.0981.

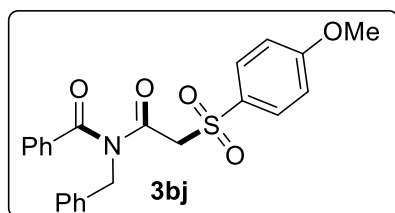

***N*-benzyl-*N*-(2-((4-methoxyphenyl)sulfonyl)acetyl)benzamide**

**3bj**: White solid (73 mg, 86% yield), m. p. 78 – 79 °C.

**TLC**:  $R_f = 0.27$  (PE: EA = 3:1, v/v).

**$^1\text{H}$  NMR (500 MHz,  $\text{CDCl}_3$ )**  $\delta$  7.81 – 7.76 (m, 2H), 7.62 – 7.54 (m, 3H), 7.48 – 7.40 (m, 2H), 7.27 – 7.19 (m, 3H), 7.13 – 7.05 (m, 2H), 7.01 – 6.94 (m, 2H), 4.94 (s, 2H), 4.57 (s, 2H), 3.86 (s, 3H).

**$^{13}\text{C}$  NMR (125 MHz,  $\text{CDCl}_3$ )**  $\delta$  174.6, 164.7, 164.2, 136.3, 134.3, 133.0, 130.8, 130.4, 129.0, 128.9, 128.6, 127.9, 127.7, 114.5, 62.6, 55.8, 50.5.

**HRMS (ESI-TOF)**  $m/z$ :  $(\text{M}+\text{H})^+$  calcd. For  $\text{C}_{23}\text{H}_{22}\text{NO}_5\text{S}$ , 424.1219; found, 424.1215.

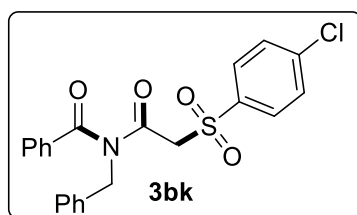

***N*-benzyl-*N*-(2-((4-chlorophenyl)sulfonyl)acetyl)benzamide**

**3bk**: White solid (70 mg, 82% yield), m. p. 113 – 114 °C.

**TLC**:  $R_f = 0.50$  (PE: EA = 3:1, v/v).

**$^1\text{H}$  NMR (500 MHz,  $\text{CDCl}_3$ )**  $\delta$  7.82 – 7.76 (m, 2H), 7.62 – 7.55 (m, 3H), 7.50 – 7.43 (m, 4H), 7.27 – 7.21 (m, 3H), 7.08 – 7.04 (m, 2H), 4.93 (s, 2H), 4.61 (s, 2H).

**$^{13}\text{C}$  NMR (125 MHz,  $\text{CDCl}_3$ )**  $\delta$  174.6, 164.4, 141.1, 137.4, 136.1, 134.1, 133.2, 130.1, 129.6, 129.1, 128.9, 128.7, 127.9, 62.3, 50.6.

**HRMS (ESI-TOF)**  $m/z$ :  $(\text{M}+\text{H})^+$  calcd. For  $\text{C}_{22}\text{H}_{19}\text{ClNO}_4\text{S}$ , 428.0723; found, 428.0721.

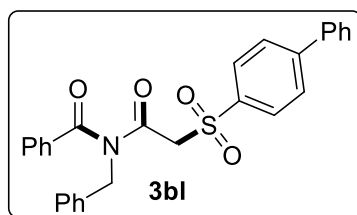

***N*-(2-([1,1'-biphenyl]-4-ylsulfonyl)acetyl)-*N*-benzylbenzamide**

**3bl**: White solid (63 mg, 67% yield), m. p. 93 – 94 °C.

**TLC**:  $R_f = 0.28$  (PE: EA = 3:1, v/v).

**$^1\text{H}$  NMR (500 MHz,  $\text{CDCl}_3$ )**  $\delta$  7.96 – 7.89 (m, 2H), 7.78 – 7.69 (m, 2H), 7.63 – 7.54 (m, 5H), 7.51 – 7.40 (m, 5H), 7.26 – 7.19 (m, 3H), 7.12 – 7.05 (m, 2H), 4.96 (s, 2H), 4.66 (s, 2H).

**$^{13}\text{C}$  NMR (125 MHz,  $\text{CDCl}_3$ )**  $\delta$  174.7, 164.6, 147.2, 139.1, 137.6, 136.2, 134.3, 133.1, 129.2, 129.1, 129.0, 128.9 (128.92), 128.9 (128.87), 128.7, 128.0, 127.9, 127.8, 127.5, 62.4, 50.6.

**HRMS (ESI-TOF)  $m/z$** : (M+H)<sup>+</sup> calcd. For  $\text{C}_{28}\text{H}_{24}\text{NO}_4\text{S}$ , 470.1426; found, 470.1424.

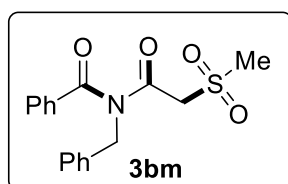

#### *N*-benzyl-*N*-(2-(methylsulfonyl)acetyl)benzamide

**3bm**: White solid (47 mg, 71% yield), m. p. 99 – 100 °C.

**TLC**:  $R_f = 0.21$  (PE: EA = 3:1, v/v).

**$^1\text{H}$  NMR (500 MHz,  $\text{CDCl}_3$ )**  $\delta$  7.65 – 7.56 (m, 3H), 7.49 – 7.43 (m, 2H), 7.30 – 7.22 (m, 3H), 7.15 – 7.10 (m, 2H), 4.99 (s, 2H), 4.42 (d,  $J = 0.5$  Hz, 2H), 3.11 (s, 3H).

**$^{13}\text{C}$  NMR (125 MHz,  $\text{CDCl}_3$ )**  $\delta$  174.5, 165.7, 136.1, 133.8, 133.4, 129.1, 129.0, 128.8, 127.9, 127.7, 60.8, 50.6, 42.3.

**HRMS (ESI-TOF)  $m/z$** : (M+H)<sup>+</sup> calcd. For  $\text{C}_{17}\text{H}_{18}\text{NO}_4\text{S}$ , 332.0957; found, 332.0958.

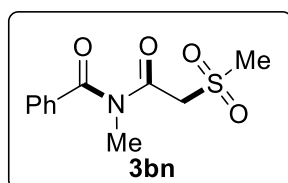

#### *N*-benzyl-*N*-(2-(methylsulfonyl)acetyl)benzamide

**3bn**: Colourless oil (36 mg, 70% yield).

**TLC**:  $R_f = 0.15$  (PE: EA = 3:1, v/v).

**$^1\text{H}$  NMR (500 MHz,  $\text{CDCl}_3$ )**  $\delta$  7.69 – 7.66 (m, 2H), 7.61 – 7.56 (m, 1H), 7.52 – 7.46 (m, 2H), 4.62 (s, 2H), 3.22 (s, 3H), 3.17 (s, 3H).

**$^{13}\text{C}$  NMR (125 MHz,  $\text{CDCl}_3$ )**  $\delta$  174.0, 165.6, 133.4, 133.0, 128.0 (128.81), 128.8 (128.80), 60.2, 42.2, 35.2.

**HRMS (ESI-TOF)  $m/z$** : (M+H)<sup>+</sup> calcd. For  $\text{C}_{11}\text{H}_{14}\text{NO}_4\text{S}$ , 256.0644; found, 256.0646.

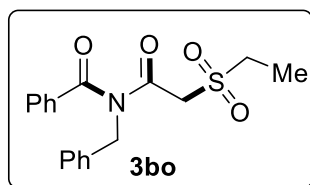

***N*-benzyl-*N*-(2-(ethylsulfonyl)acetyl)benzamide**

**3bo:** White solid (50 mg, 72% yield), m. p. 85 – 86 °C.

**TLC:**  $R_f = 0.30$  (PE: EA = 3:1, v/v).

**$^1\text{H}$  NMR (500 MHz,  $\text{CDCl}_3$ )**  $\delta$  7.66 – 7.62 (m, 2H), 7.60 – 7.55 (m, 1H), 7.49 – 7.43 (m, 2H), 7.30 – 7.22 (m, 3H), 7.15 – 7.11 (m, 2H), 4.99 (s, 2H), 4.39 (s, 2H), 3.24 (q,  $J = 7.5$  Hz, 2H), 1.40 (t,  $J = 7.5$  Hz, 3H).

**$^{13}\text{C}$  NMR (125 MHz,  $\text{CDCl}_3$ )**  $\delta$  174.6, 165.6, 136.2, 134.0, 133.3, 129.1, 129.0, 128.8, 127.9, 127.7, 58.0, 50.7, 48.7, 6.8.

**HRMS (ESI-TOF)  $m/z$ :** ( $\text{M}+\text{H}$ ) $^+$  calcd. For  $\text{C}_{18}\text{H}_{20}\text{NO}_4\text{S}$ , 346.1113; found, 346.1109.

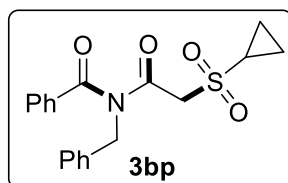

***N*-benzyl-*N*-(2-(cyclopropylsulfonyl)acetyl)benzamide**

**3bp:** White solid (56 mg, 78% yield), m. p. 107 – 108 °C.

**TLC:**  $R_f = 0.28$  (PE: EA = 3:1, v/v).

**$^1\text{H}$  NMR (500 MHz,  $\text{CDCl}_3$ )**  $\delta$  7.66 – 7.61 (m, 2H), 7.60 – 7.55 (m, 1H), 7.49 – 7.42 (m, 2H), 7.30 – 7.21 (m, 3H), 7.18 – 7.10 (m, 2H), 5.00 (s, 2H), 4.47 (s, 2H), 2.82 – 2.70 (m, 1H), 1.31 – 1.20 (m, 2H), 1.11 – 1.00 (m, 2H).

**$^{13}\text{C}$  NMR (125 MHz,  $\text{CDCl}_3$ )**  $\delta$  174.7, 165.4, 136.3, 134.2, 133.2, 129.1, 129.0, 128.8, 127.9, 127.8, 60.1, 50.6, 31.2, 5.6.

**HRMS (ESI-TOF)  $m/z$ :** ( $\text{M}+\text{H}$ ) $^+$  calcd. For  $\text{C}_{19}\text{H}_{20}\text{NO}_4\text{S}$ , 358.1113; found, 358.1117.

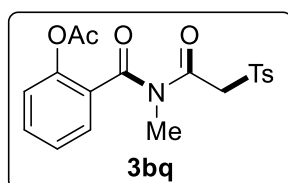

**2-(methyl(2-tosylacetyl)carbamoyl)phenyl acetate**

**3bq**: White solid (68 mg, 87% yield), m. p. 108 – 110 °C.

**TLC**:  $R_f = 0.20$  (PE: EA = 3:1, v/v).

**$^1\text{H}$  NMR (400 MHz,  $\text{CDCl}_3$ )**  $\delta$  7.89 – 7.83 (m, 2H), 7.62 – 7.53 (m, 2H), 7.42 – 7.34 (m, 3H), 7.23 (dd,  $J_1 = 8.0$  Hz,  $J_2 = 0.8$  Hz, 1H), 4.85 (s, 2H), 3.16 (s, 3H), 2.47 (s, 3H), 2.31 (s, 3H).

**$^{13}\text{C}$  NMR (100 MHz,  $\text{CDCl}_3$ )**  $\delta$  171.2, 169.5, 164.8, 148.1, 145.3, 136.6, 133.0, 130.0, 128.9, 128.6, 127.7, 126.3, 123.3, 62.4, 34.5, 21.8, 21.1.

**HRMS (ESI-TOF)  $m/z$** : ( $\text{M}+\text{H}$ )<sup>+</sup> calcd. For  $\text{C}_{19}\text{H}_{20}\text{NO}_6\text{S}$ , 390.1011; found, 390.1008.

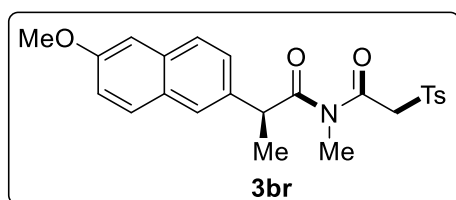

### **(S)-2-(6-methoxynaphthalen-2-yl)-N-methyl-N-(2-tosylacetyl)propanamide**

**3br**: Colourless oil (42 mg, 48% yield).

**TLC**:  $R_f = 0.21$  (PE: EA = 3:1, v/v).

**$^1\text{H}$  NMR (400 MHz,  $\text{CDCl}_3$ )**  $\delta$  7.79 (d,  $J = 8.4$  Hz, 2H), 7.73 (d,  $J = 8.4$  Hz, 1H), 7.70 (d,  $J = 8.4$  Hz, 1H), 7.60 (s, 1H), 7.33 – 7.27 (m, 3H), 7.19 – 7.10 (m, 2H), 5.01 (d,  $J = 14.8$  Hz, 1H), 4.76 (d,  $J = 14.8$  Hz, 1H), 4.19 (q,  $J = 6.8$  Hz, 1H), 3.91 (s, 3H), 3.11 (s, 3H), 2.42 (s, 3H), 1.53 (d,  $J = 6.8$  Hz, 3H).

**$^{13}\text{C}$  NMR (100 MHz,  $\text{CDCl}_3$ )**  $\delta$  177.3, 165.2, 158.1, 145.2, 136.7, 134.7, 133.9, 129.8, 129.4, 129.2, 128.7, 128.1, 126.0, 125.8, 119.6, 105.7, 63.6, 55.5, 47.0, 31.9, 21.8, 20.9.

**HRMS (ESI-TOF)  $m/z$** : ( $\text{M}+\text{H}$ )<sup>+</sup> calcd. For  $\text{C}_{24}\text{H}_{26}\text{NO}_5\text{S}$ , 440.1532; found, 440.1529.

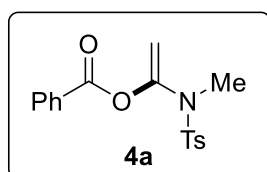

### **1-((N,4-dimethylphenyl)sulfonamido)vinyl benzoate**

**4a**: White solid (67 mg, quant.), m. p. 100 – 102 °C.

**TLC**:  $R_f = 0.35$  (PE: EA = 5:1, v/v).

**$^1\text{H}$  NMR (500 MHz,  $\text{CDCl}_3$ )**  $\delta$  7.89 – 7.84 (m, 2H), 7.77 – 7.72 (m, 2H), 7.61 – 7.56 (m, 1H), 7.44 – 7.38 (m, 2H), 7.29 – 7.24 (m, 2H), 5.03 (d,  $J = 2.5$  Hz, 1H), 4.89 (d,  $J = 2.5$  Hz, 1H), 3.10 (s, 3H), 2.39 (s, 3H).

$^{13}\text{C}$  NMR (125 MHz,  $\text{CDCl}_3$ )  $\delta$  164.1, 147.0, 144.1, 134.4, 133.9, 130.3, 129.7, 128.7, 128.6, 128.1, 101.8, 37.3, 21.6.

HRMS (ESI-TOF)  $m/z$ :  $(\text{M}+\text{H})^+$  calcd. For  $\text{C}_{17}\text{H}_{18}\text{NO}_4\text{S}$ , 332.0957; found, 332.0951.

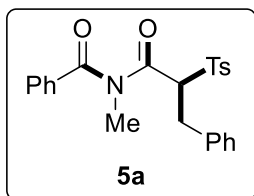

#### *N*-methyl-*N*-(3-phenyl-2-tosylpropanoyl)benzamide

**5a**: Colorless oil (63 mg, 75%).

TLC:  $R_f$  = 0.34 (PE: EA = 3:1, v/v).

$^1\text{H}$  NMR (500 MHz,  $\text{CDCl}_3$ )  $\delta$  7.82 – 7.77 (m, 2H), 7.54 – 7.48 (m, 1H), 7.41 – 7.33 (m, 6H), 7.25 – 7.17 (m, 3H), 7.16 – 7.08 (m, 2H), 5.70 (dd,  $J_1$  = 11.0 Hz,  $J_2$  = 4.0 Hz, 1H), 3.34 (dd,  $J_1$  = 13.5 Hz,  $J_2$  = 11.5 Hz, 1H), 3.23 (dd,  $J_1$  = 13.5,  $J_2$  = 4.0 Hz, 1H), 3.04 (s, 3H), 2.46 (s, 3H).

$^{13}\text{C}$  NMR (125 MHz,  $\text{CDCl}_3$ )  $\delta$  174.3, 167.6, 145.5, 135.8, 134.3, 134.0, 132.7, 129.8, 129.6, 129.2, 128.8, 128.7, 127.1, 69.2, 35.7, 34.1, 21.8.

HRMS (ESI-TOF)  $m/z$ :  $(\text{M}+\text{H})^+$  calcd. For  $\text{C}_{24}\text{H}_{24}\text{NO}_2\text{S}$ , 422.1426; found, 422.1421.

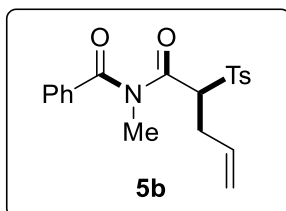

#### *N*-methyl-*N*-(2-tosylpent-4-enoyl)benzamide

**5b**: Colorless oil (51 mg, 68%).

TLC:  $R_f$  = 0.35 (PE: EA = 3:1, v/v).

$^1\text{H}$  NMR (500 MHz,  $\text{CDCl}_3$ )  $\delta$  7.73 (d,  $J$  = 8.0 Hz, 2H), 7.69 – 7.65 (m, 2H), 7.61 – 7.56 (m, 1H), 7.52 – 7.46 (m, 2H), 7.35 (d,  $J$  = 8.0 Hz, 2H), 5.77 – 5.67 (m, 1H), 5.46 (dd,  $J_1$  = 11.0,  $J_2$  = 4.0 Hz, 1H), 5.14 (dd,  $J_1$  = 17.0 Hz,  $J_2$  = 1.0 Hz, 1H), 5.08 (dd,  $J_1$  = 10.0 Hz,  $J_2$  = 1.0 Hz, 1H), 3.19 (s, 3H), 2.86 – 2.76 (m, 1H), 2.68 – 2.60 (m, 1H), 2.46 (s, 3H).

$^{13}\text{C}$  NMR (125 MHz,  $\text{CDCl}_3$ )  $\delta$  174.7, 167.9, 145.5, 134.1, 134.0, 132.9, 132.2, 129.8, 129.6, 129.0, 128.9, 118.9, 67.6, 35.9, 32.2, 21.8.

HRMS (ESI-TOF)  $m/z$ :  $(\text{M}+\text{H})^+$  calcd. For  $\text{C}_{20}\text{H}_{22}\text{NO}_4\text{S}$ , 372.1270; found, 372.1273.

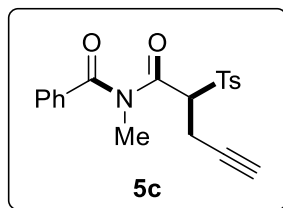

***N*-methyl-*N*-(2-tosylpent-4-ynoyl)benzamide**

**5c:** Colorless oil (55 mg, 75%).

**TLC:**  $R_f = 0.35$  (PE: EA = 3:1, v/v).

**$^1\text{H}$  NMR (500 MHz,  $\text{CDCl}_3$ )**  $\delta$  7.75 – 7.69 (m, 4H), 7.62 – 7.57 (m, 1H), 7.52 – 7.48 (m, 2H), 7.35 (d,  $J = 8.0$  Hz, 2H), 5.64 (dd,  $J_1 = 10.0$ ,  $J_2 = 4.0$  Hz, 1H), 3.25 (s, 3H), 3.04 (ddd,  $J_1 = 16.5$  Hz,  $J_2 = 10.0$  Hz,  $J_3 = 2.5$  Hz, 1H), 2.71 (ddd,  $J_1 = 16.5$  Hz,  $J_2 = 4.0$  Hz,  $J_3 = 2.5$  Hz, 1H), 2.45 (s, 3H), 2.01 (t,  $J = 2.5$  Hz, 1H).

**$^{13}\text{C}$  NMR (125 MHz,  $\text{CDCl}_3$ )**  $\delta$  174.5, 166.8, 145.9, 134.1, 133.8, 132.9, 130.0, 129.5, 129.0, 128.9, 78.3, 71.3, 66.5, 36.1, 21.8, 18.2.

**HRMS (ESI-TOF)  $m/z$ :** (M+H)<sup>+</sup> calcd. For  $\text{C}_{20}\text{H}_{20}\text{NO}_4\text{S}$ , 370.1113; found, 370.1117.

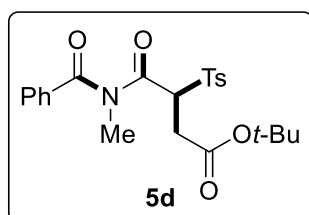

***tert*-butyl (*S*)-4-(*N*-methylbenzamido)-4-oxo-3-tosylbutanoate**

**5d:** White solid (45 mg, 51% yield), m. p. 160 – 162 °C.

**TLC:**  $R_f = 0.4$  (PE: EA = 3:1, v/v).

**$^1\text{H}$  NMR (500 MHz,  $\text{CDCl}_3$ )**  $\delta$  7.76 – 7.71 (m, 4H), 7.59 – 7.54 (m, 1H), 7.51 – 7.46 (m, 2H), 7.35 (d,  $J = 8.0$  Hz, 2H), 6.00 (d,  $J = 11.0$  Hz, 1H), 3.25 (s, 3H), 3.19 (dd,  $J_1 = 17.0$  Hz,  $J_2 = 11.0$  Hz, 1H), 2.71 (dd,  $J_1 = 17.0$  Hz,  $J_2 = 3.5$  Hz, 1H), 2.44 (s, 3H), 1.39 (s, 9H).

**$^{13}\text{C}$  NMR (125 MHz,  $\text{CDCl}_3$ )**  $\delta$  174.6, 168.8, 167.1, 145.7, 134.8, 134.0, 132.5, 130.0, 129.4, 128.9, 128.7, 82.2, 63.9, 36.2, 34.1, 28.0, 21.8.

**HRMS (ESI-TOF)  $m/z$ :** (M+H)<sup>+</sup> calcd. For  $\text{C}_{23}\text{H}_{28}\text{NO}_6\text{S}$ , 446.1637; found, 446.1633.



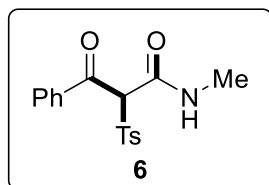

***N*-methyl-3-oxo-3-phenyl-2-tosylpropanamide**

**6:** White solid (60 mg, 91% yield), m. p. 160 – 162 °C.

**TLC:**  $R_f = 0.15$  (PE: EA = 3:1, v/v).

**$^1\text{H}$  NMR (500 MHz,  $\text{CDCl}_3$ )**  $\delta$  7.94 – 7.89 (m, 2H), 7.80 – 7.74 (m, 2H), 7.64 – 7.58 (m, 1H), 7.50 – 7.39 (m, 3H), 7.32 (d,  $J = 8.0$  Hz, 2H), 6.00 (s, 1H), 2.86 (d,  $J = 5.0$  Hz, 3H), 2.41 (s, 3H).

**$^{13}\text{C}$  NMR (125 MHz,  $\text{CDCl}_3$ )**  $\delta$  188.6, 159.8, 146.2, 136.2, 134.8, 134.4, 130.0, 129.3 (129.33), 129.3 (129.32), 129.0, 75.7, 27.2, 21.8.

**HRMS (ESI-TOF)  $m/z$ :** (M+H)<sup>+</sup> calcd. For  $\text{C}_{17}\text{H}_{18}\text{NO}_4\text{S}$ , 332.0957; found, 332.0965.

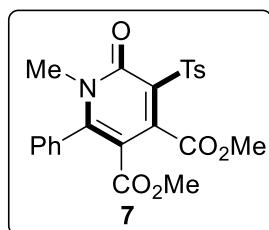

**dimethyl 1-methyl-6-oxo-2-phenyl-5-tosyl-1,6-dihydropyridine-3,4-dicarboxylate**

**7:** White solid (80 mg, 88% yield), m. p. 231 – 232 °C.

**TLC:**  $R_f = 0.30$  (PE: EA = 1:1, v/v).

**$^1\text{H}$  NMR (500 MHz,  $\text{CDCl}_3$ )**  $\delta$  8.09 (d,  $J = 8.0$  Hz, 2H), 7.54 – 7.46 (m, 3H), 7.35 (d,  $J = 8.0$  Hz, 2H), 7.25 – 7.17 (m, 2H), 4.03 (s, 3H), 3.37 (s, 3H), 3.21 (s, 3H), 2.43 (s, 3H).

**$^{13}\text{C}$  NMR (125 MHz,  $\text{CDCl}_3$ )**  $\delta$  165.0, 164.7, 157.5, 157.0, 145.8, 144.9, 136.5, 132.9, 130.5, 129.5, 129.4, 129.2, 127.4, 125.3, 110.5, 53.6, 52.6, 35.2, 21.9.

**HRMS (ESI-TOF)  $m/z$ :** (M+H)<sup>+</sup> calcd. For  $\text{C}_{23}\text{H}_{22}\text{NO}_7\text{S}$ , 456.1117; found, 456.1133.

## 9. X-ray Crystallographic Data

Crystals suitable for X-ray diffraction experiments were obtained by following methods: compound **3t** and **3bj** were crystallized from their solution in PE/EA. Intensity data for compounds was collected on ‘Bruke Apex2’ diffractometer at 296(2) (MoK/ $\alpha$  radiation, radiation wavelength = 0.7107). The structures were solved by direct methods and refined by the full-matrix least-squares

method using the SHELX-97 program package.<sup>10</sup> The geometrical parameters and the figures were analyzed using the program OLEX2.<sup>11</sup>

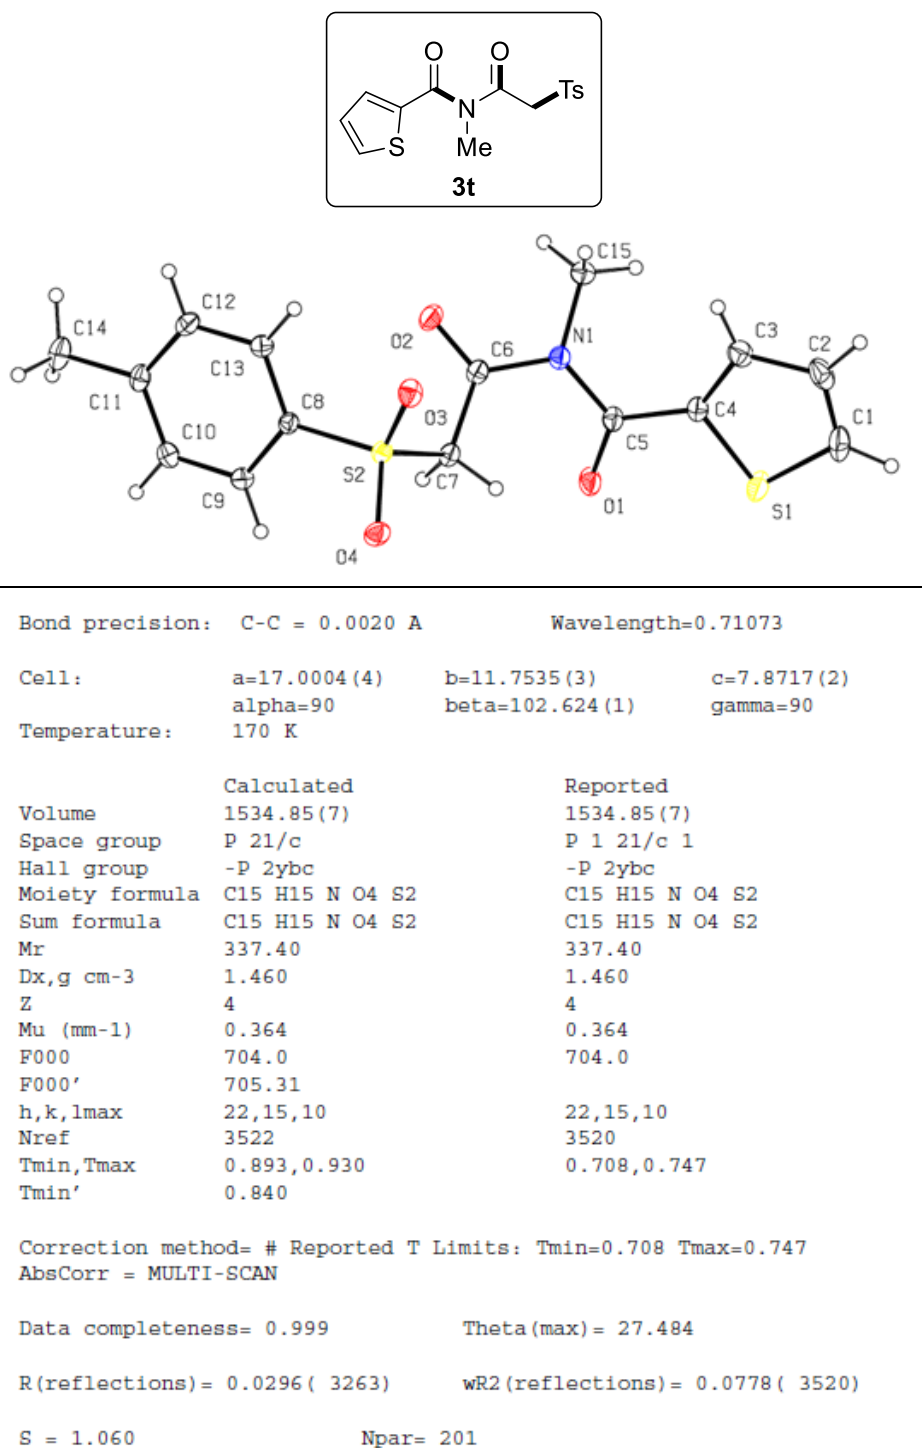

**Fig. S12 X-ray analysis of 3t.** Detail X-ray crystallographic data of 3t (CCDC 2045517).

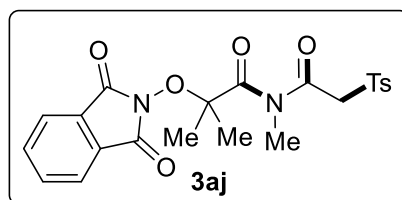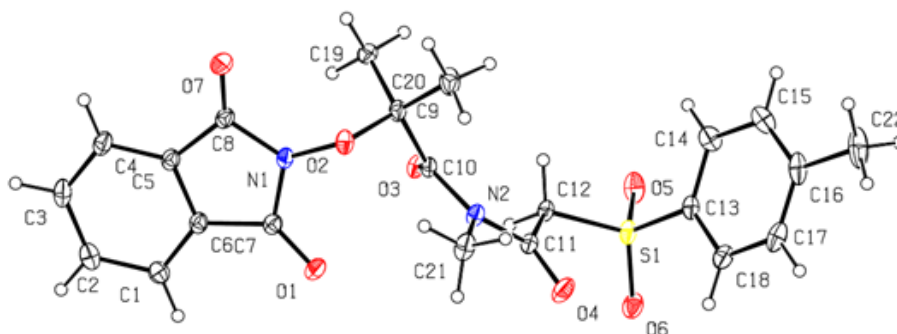

|                        |                                            |                                   |                   |
|------------------------|--------------------------------------------|-----------------------------------|-------------------|
| Bond precision:        | C-C = 0.0022 Å                             | Wavelength=0.71073                |                   |
| Cell:                  | a=7.266 (3)                                | b=11.193 (4)                      | c=14.501 (5)      |
|                        | alpha=70.164 (13)                          | beta=79.380 (16)                  | gamma=81.797 (18) |
| Temperature:           | 170 K                                      |                                   |                   |
|                        | Calculated                                 | Reported                          |                   |
| Volume                 | 1086.3 (7)                                 | 1086.2 (7)                        |                   |
| Space group            | P -1                                       | P -1                              |                   |
| Hall group             | -P 1                                       | -P 1                              |                   |
| Moiety formula         | C22 H22 N2 O7 S                            | C22 H22 N2 O7 S                   |                   |
| Sum formula            | C22 H22 N2 O7 S                            | C22 H22 N2 O7 S                   |                   |
| Mr                     | 458.48                                     | 458.47                            |                   |
| Dx, g cm <sup>-3</sup> | 1.402                                      | 1.402                             |                   |
| Z                      | 2                                          | 2                                 |                   |
| Mu (mm <sup>-1</sup> ) | 0.196                                      | 0.196                             |                   |
| F000                   | 480.0                                      | 480.0                             |                   |
| F000'                  | 480.50                                     |                                   |                   |
| h, k, lmax             | 9, 14, 18                                  | 9, 14, 18                         |                   |
| Nref                   | 4802                                       | 4787                              |                   |
| Tmin, Tmax             | 0.947, 0.986                               | 0.716, 0.746                      |                   |
| Tmin'                  | 0.928                                      |                                   |                   |
| Correction method=     | # Reported T Limits: Tmin=0.716 Tmax=0.746 |                                   |                   |
| AbsCorr =              | MULTI-SCAN                                 |                                   |                   |
| Data completeness=     | 0.997                                      | Theta (max)= 27.114               |                   |
| R (reflections)=       | 0.0356 ( 4349)                             | wR2 (reflections)= 0.0909 ( 4787) |                   |
| S =                    | 1.060                                      | Npar= 293                         |                   |

**Fig. S13 X-ray analysis of 3aj.** Detail X-ray crystallographic data of **3aj** (CCDC 2045518).

## 10.HPLC Charts

HPLC analysis was conducted on a CHIRALPAK AD-H column (hexane/isopropanol, 254 nm).

**3am:** AD-H column (hexane/isopropanol = 55/45, flow = 1.0 mL/min, 254 nm).

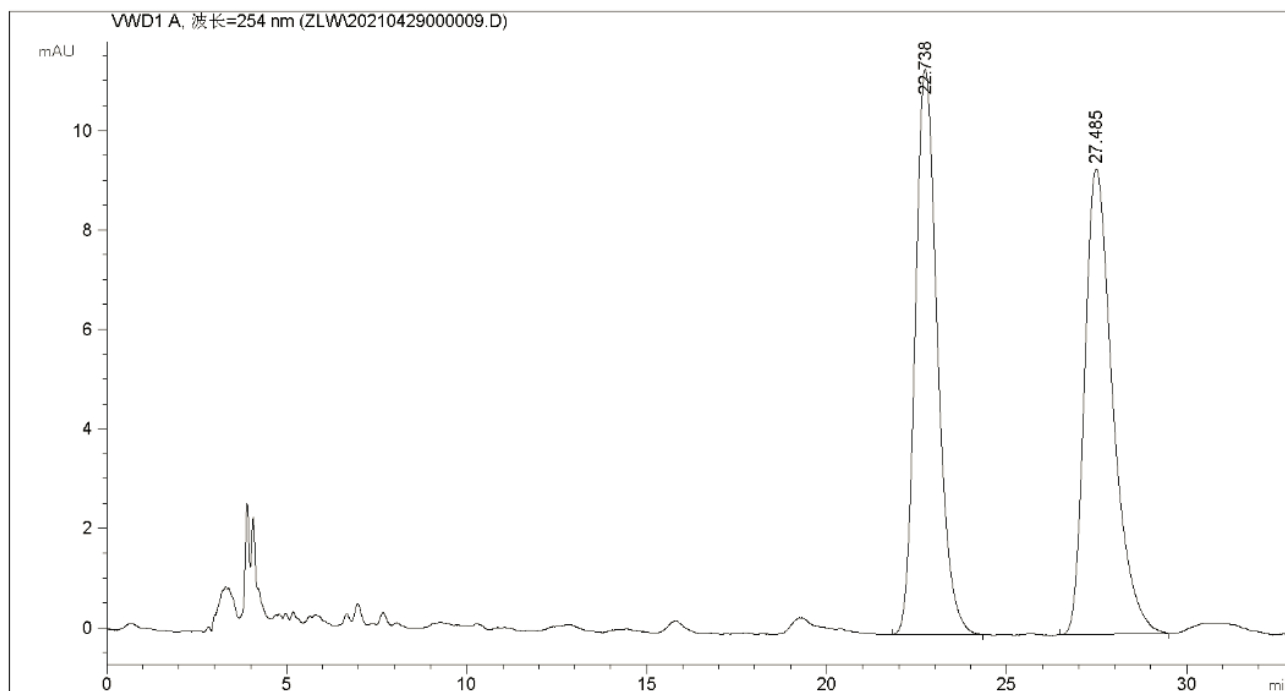

| Peak # | Ret. Time (min) | Area (mAU*s) | Height (mAU) | Conc. (%) |
|--------|-----------------|--------------|--------------|-----------|
| 1      | 22.738          | 486.00229    | 11.36510     | 48.9761   |
| 2      | 27.485          | 506.32245    | 9.36055      | 51.0239   |
| Totals |                 | 992.32474    | 20.72565     |           |

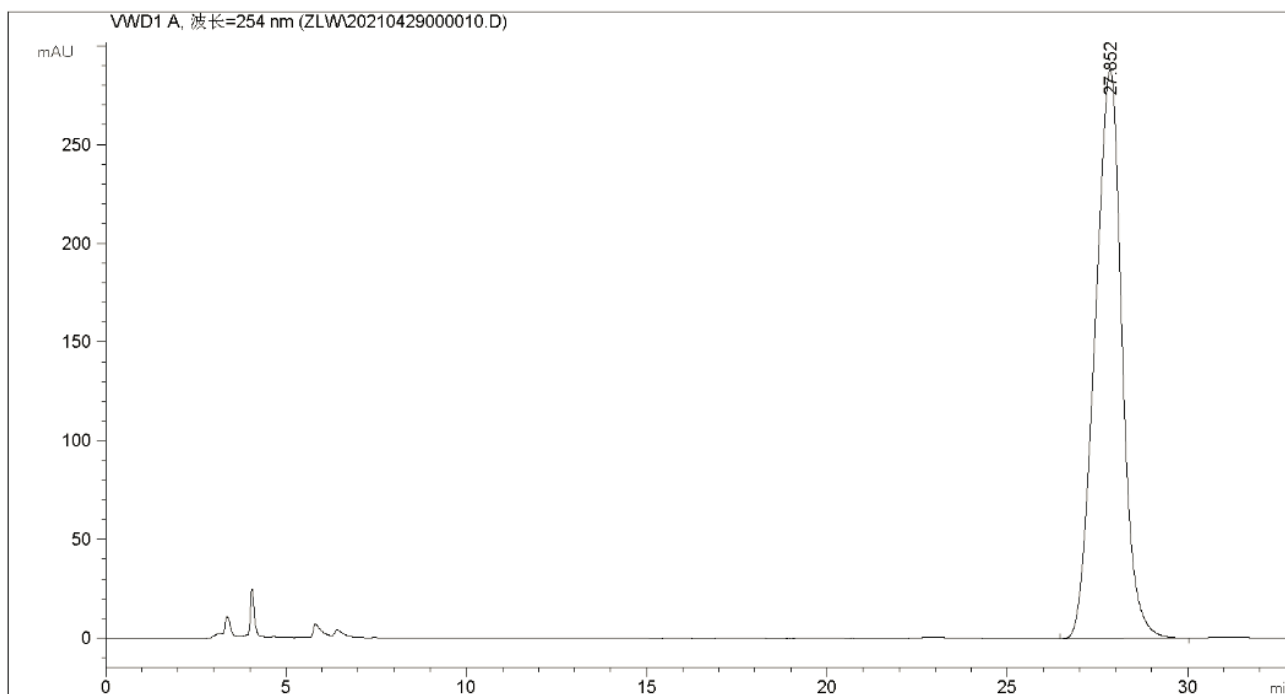

| Peak # | Ret. Time (min) | Area (mAU*s) | Height (mAU) | Conc. (%) |
|--------|-----------------|--------------|--------------|-----------|
| 1      | 27.852          | 1.48997e4    | 287.89261    | 100       |
| Totals |                 | 1.48997e4    | 287.89261    |           |

**3an:** AD-H column (hexane/isopropanol = 55/45, flow = 1.0 mL/min, 254 nm).

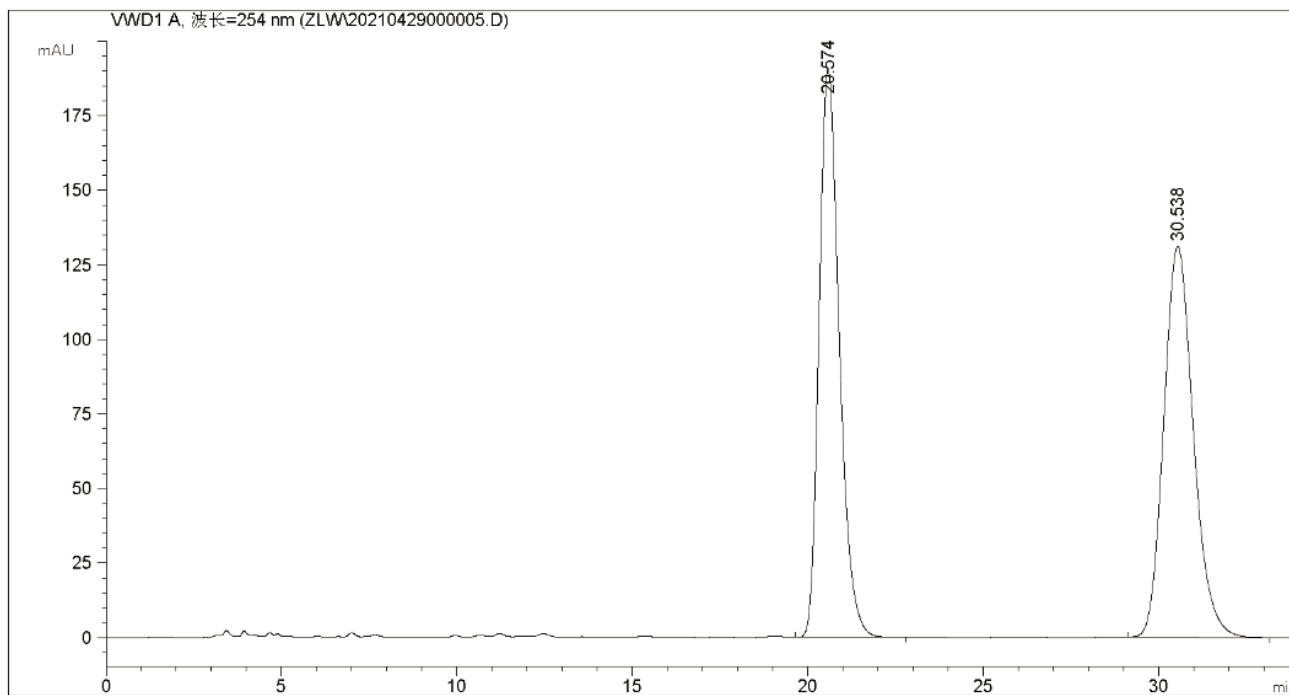

| Peak # | Ret. Time (min) | Area (mAU*s) | Height (mAU) | Conc. (%) |
|--------|-----------------|--------------|--------------|-----------|
| 1      | 20.574          | 7650.14990   | 190.81012    | 49.9333   |
| 2      | 30.538          | 7670.59717   | 131.08847    | 50.0667   |
| Totals |                 | 1.53207e4    | 321.89859    |           |

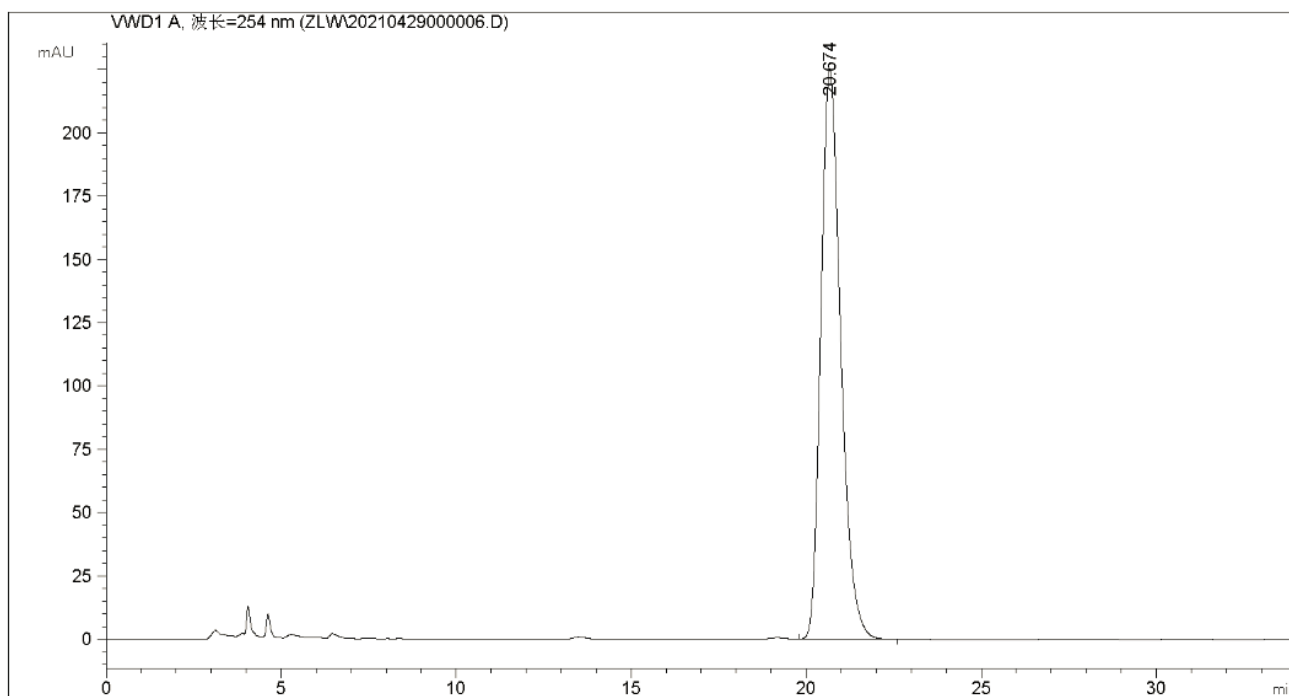

| Peak # | Ret. Time (min) | Area (mAU*s) | Height (mAU) | Conc. (%) |
|--------|-----------------|--------------|--------------|-----------|
| 1      | 20.674          | 8897.97461   | 224.61006    | 100       |
| Totals |                 | 8897.97461   | 224.61006    |           |

**3ao:** AD-H column (hexane/isopropanol = 55/45, flow = 1.0 mL/min, 254 nm).

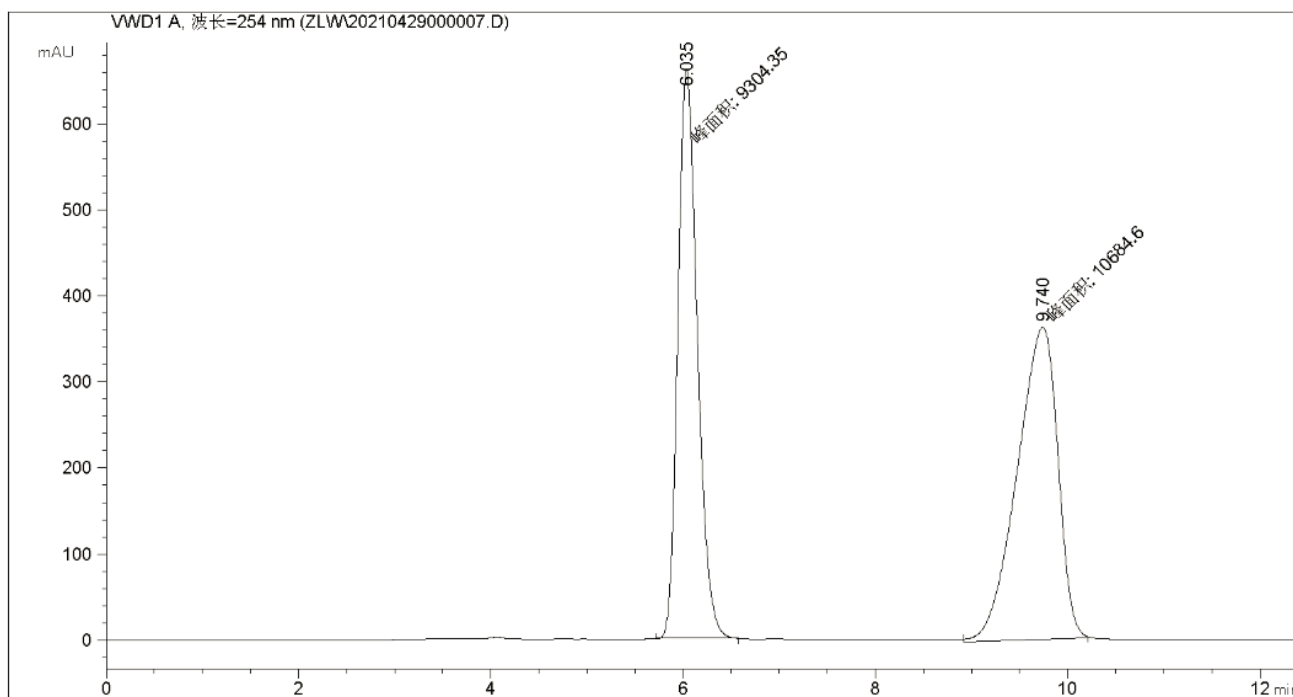

| Peak # | Ret. Time (min) | Area (mAU*s) | Height (mAU) | Conc. (%) |
|--------|-----------------|--------------|--------------|-----------|
| 1      | 6.035           | 9304.34766   | 661.18011    | 46.5474   |
| 2      | 9.740           | 1.06846e4    | 363.54550    | 53.4526   |
| Totals |                 | 1.99890e4    | 1024.72562   |           |

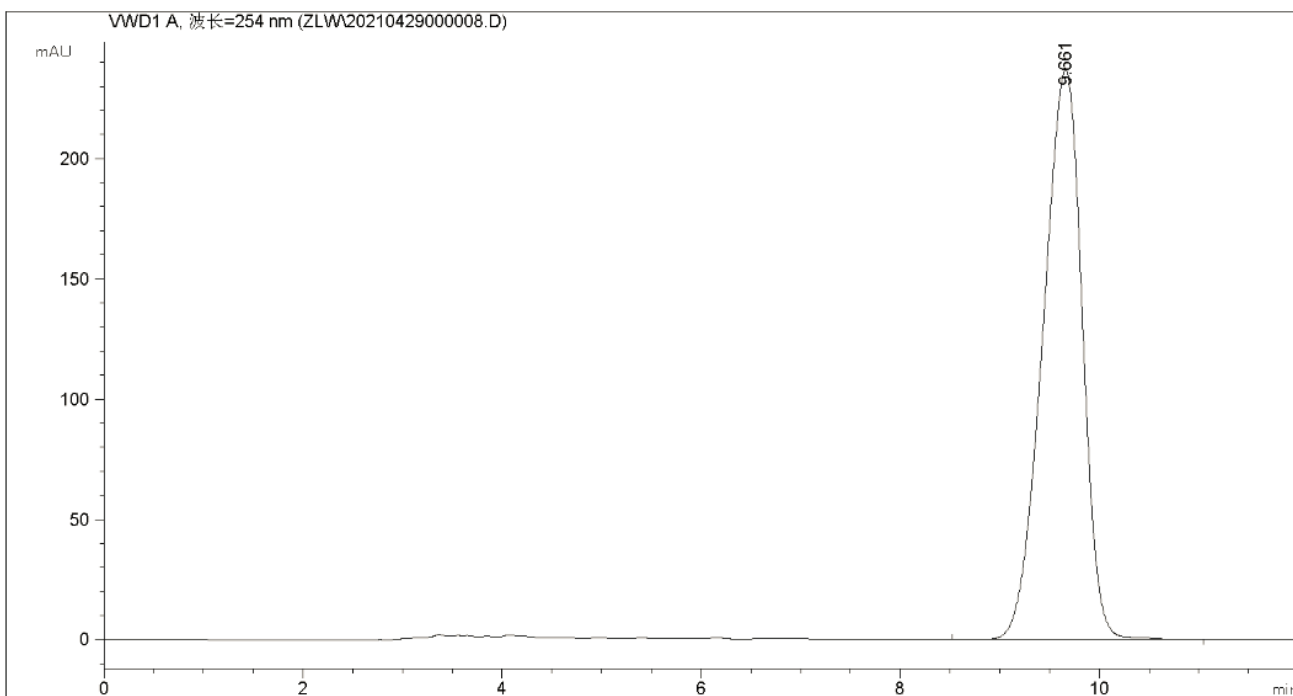

| Peak # | Ret. Time (min) | Area (mAU*s) | Height (mAU) | Conc. (%) |
|--------|-----------------|--------------|--------------|-----------|
| 1      | 9.661           | 6507.64258   | 236.88919    | 100       |
| Totals |                 | 6507.64258   | 236.88919    |           |

**3ax:** AD-H column (hexane/isopropanol = 55/45, flow = 1.0 mL/min, 254 nm).

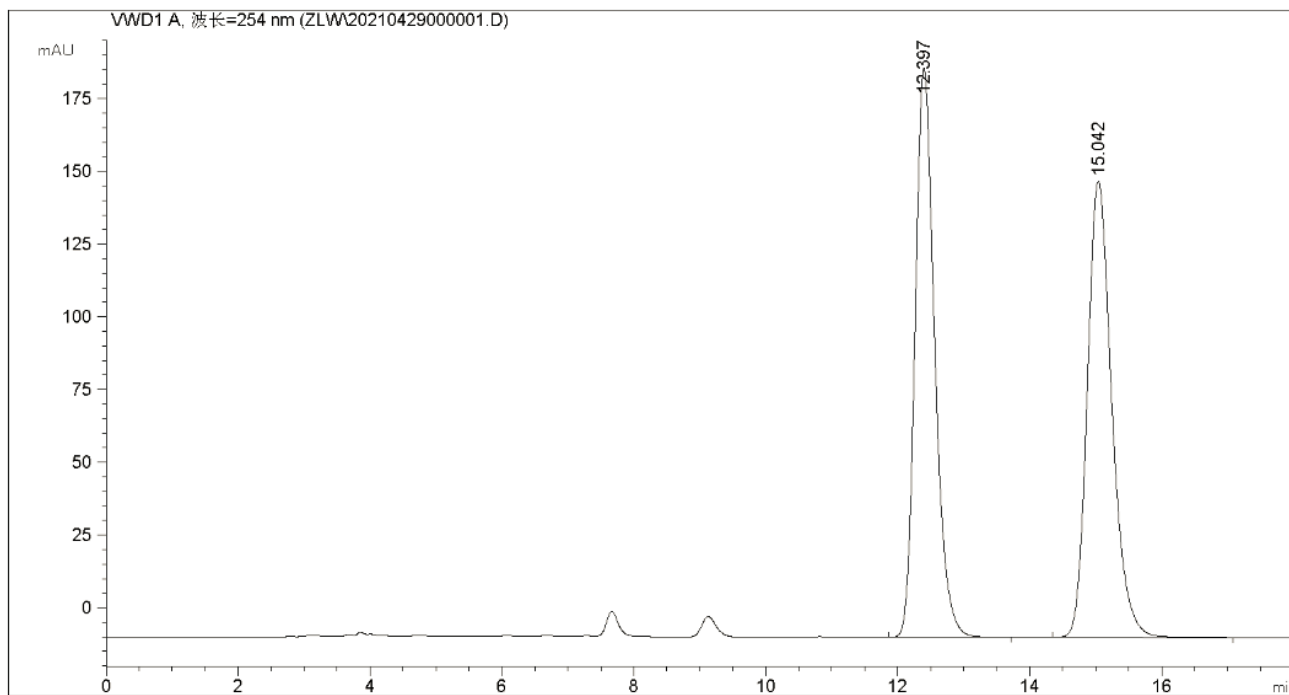

| Peak # | Ret. Time (min) | Area (mAU*s) | Height (mAU) | Conc. (%) |
|--------|-----------------|--------------|--------------|-----------|
| 1      | 12.397          | 4021.91676   | 195.55592    | 49.9350   |
| 2      | 15.042          | 4032.39526   | 156.78488    | 50.0650   |
| Totals |                 | 8054.32202   | 352.34081    |           |

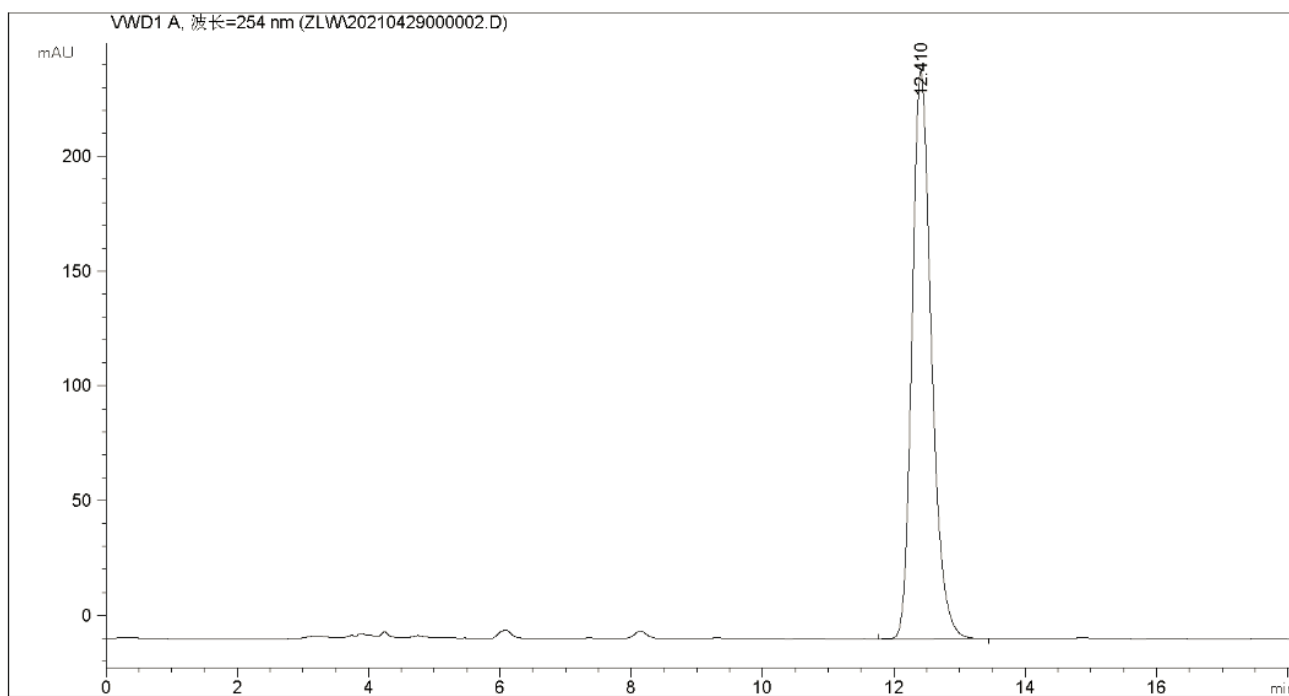

| Peak # | Ret. Time (min) | Area (mAU*s) | Height (mAU) | Conc. (%) |
|--------|-----------------|--------------|--------------|-----------|
| 1      | 12.410          | 5080.63379   | 247.55154    | 100       |
| Totals |                 | 5080.63379   | 247.55154    |           |

**3ay:** AD-H column (hexane/isopropanol = 55/45, flow = 1.0 mL/min, 254 nm).

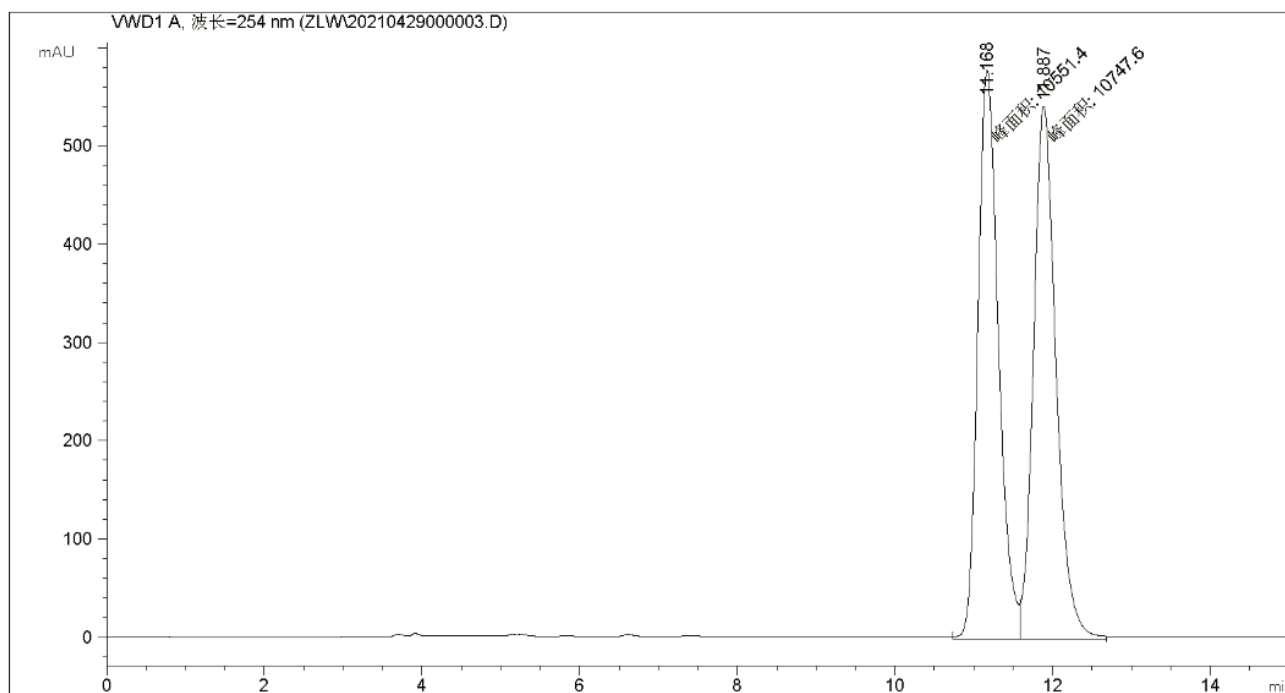

| Peak # | Ret. Time (min) | Area (mAU*s) | Height (mAU) | Conc. (%) |
|--------|-----------------|--------------|--------------|-----------|
| 1      | 11.168          | 1.05514e4    | 579.02026    | 49.5396   |
| 2      | 11.887          | 1.07476e4    | 542.35980    | 50.4604   |
| Totals |                 | 2.12990e4    | 1121.38007   |           |

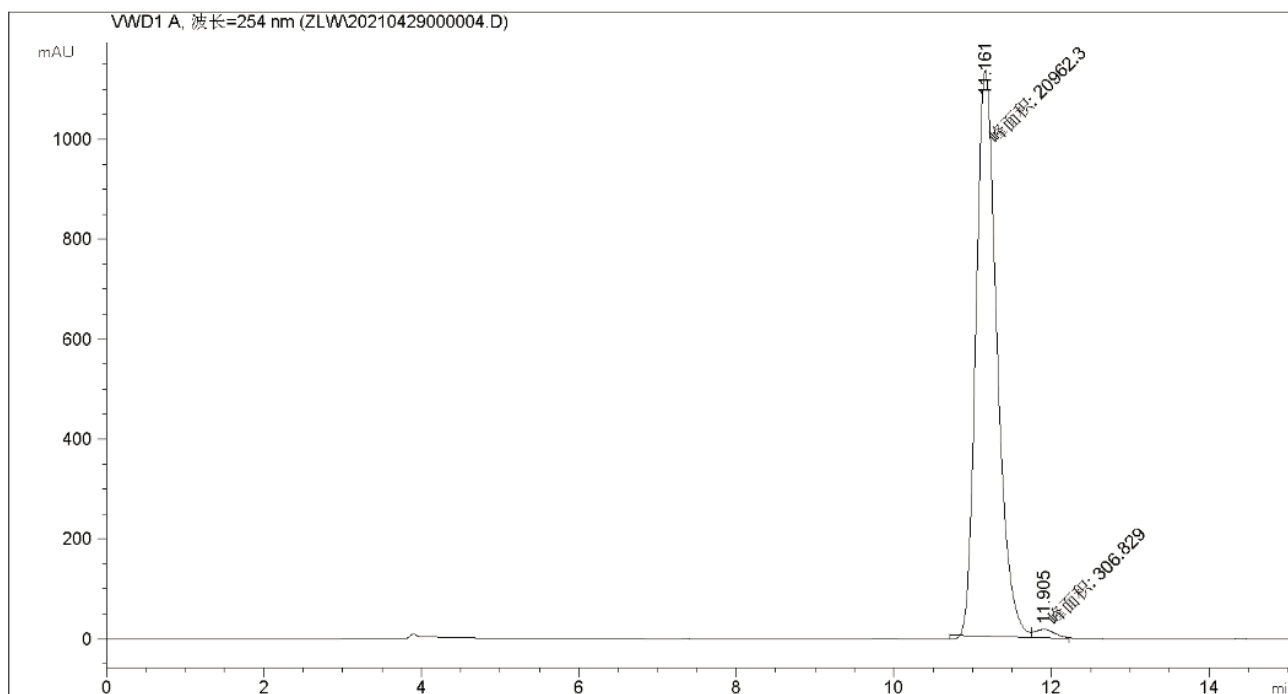

| Peak # | Ret. Time (min) | Area (mAU*s) | Height (mAU) | Conc. (%) |
|--------|-----------------|--------------|--------------|-----------|
| 1      | 11.161          | 2.09623e4    | 1133.20300   | 98.5574   |
| 2      | 11.905          | 306.82938    | 17.07603     | 1.4426    |
| Totals |                 | 2.12691e4    | 1150.27904   |           |



## 11. Copies of NMR Spectra

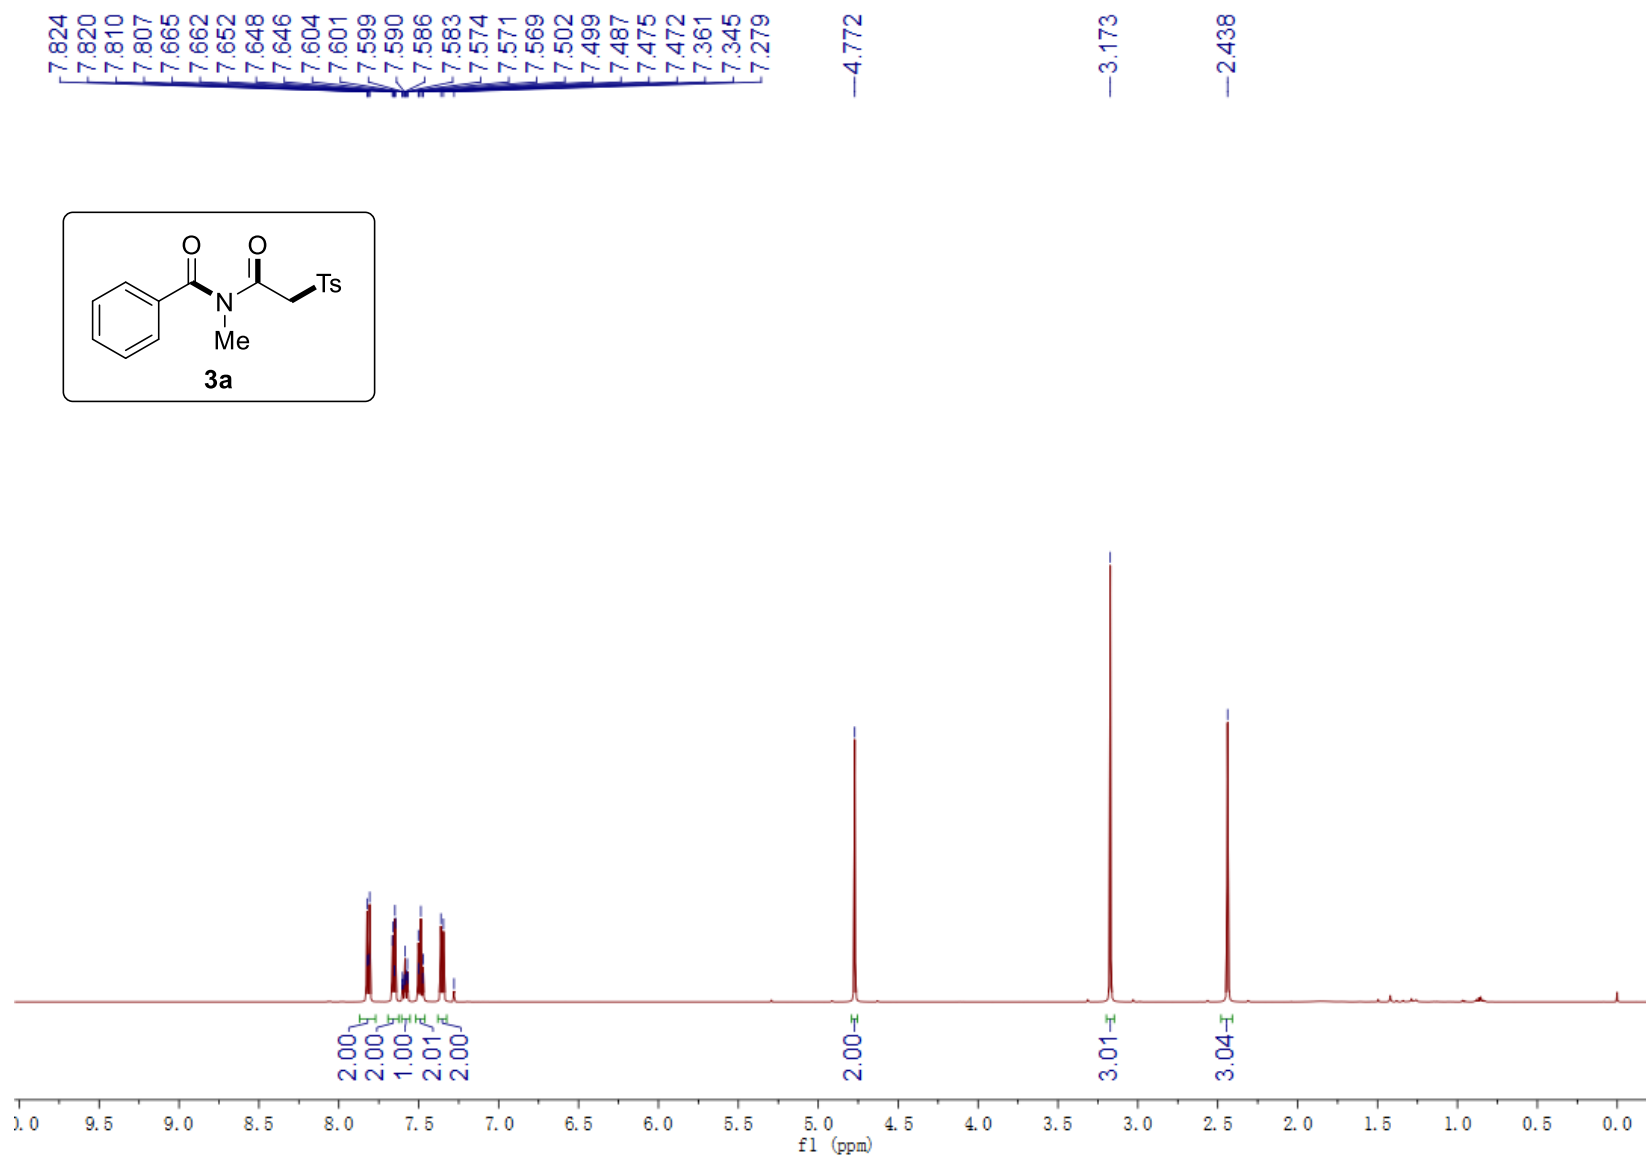

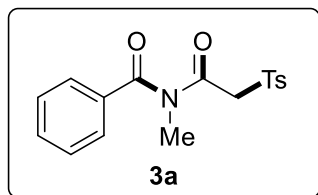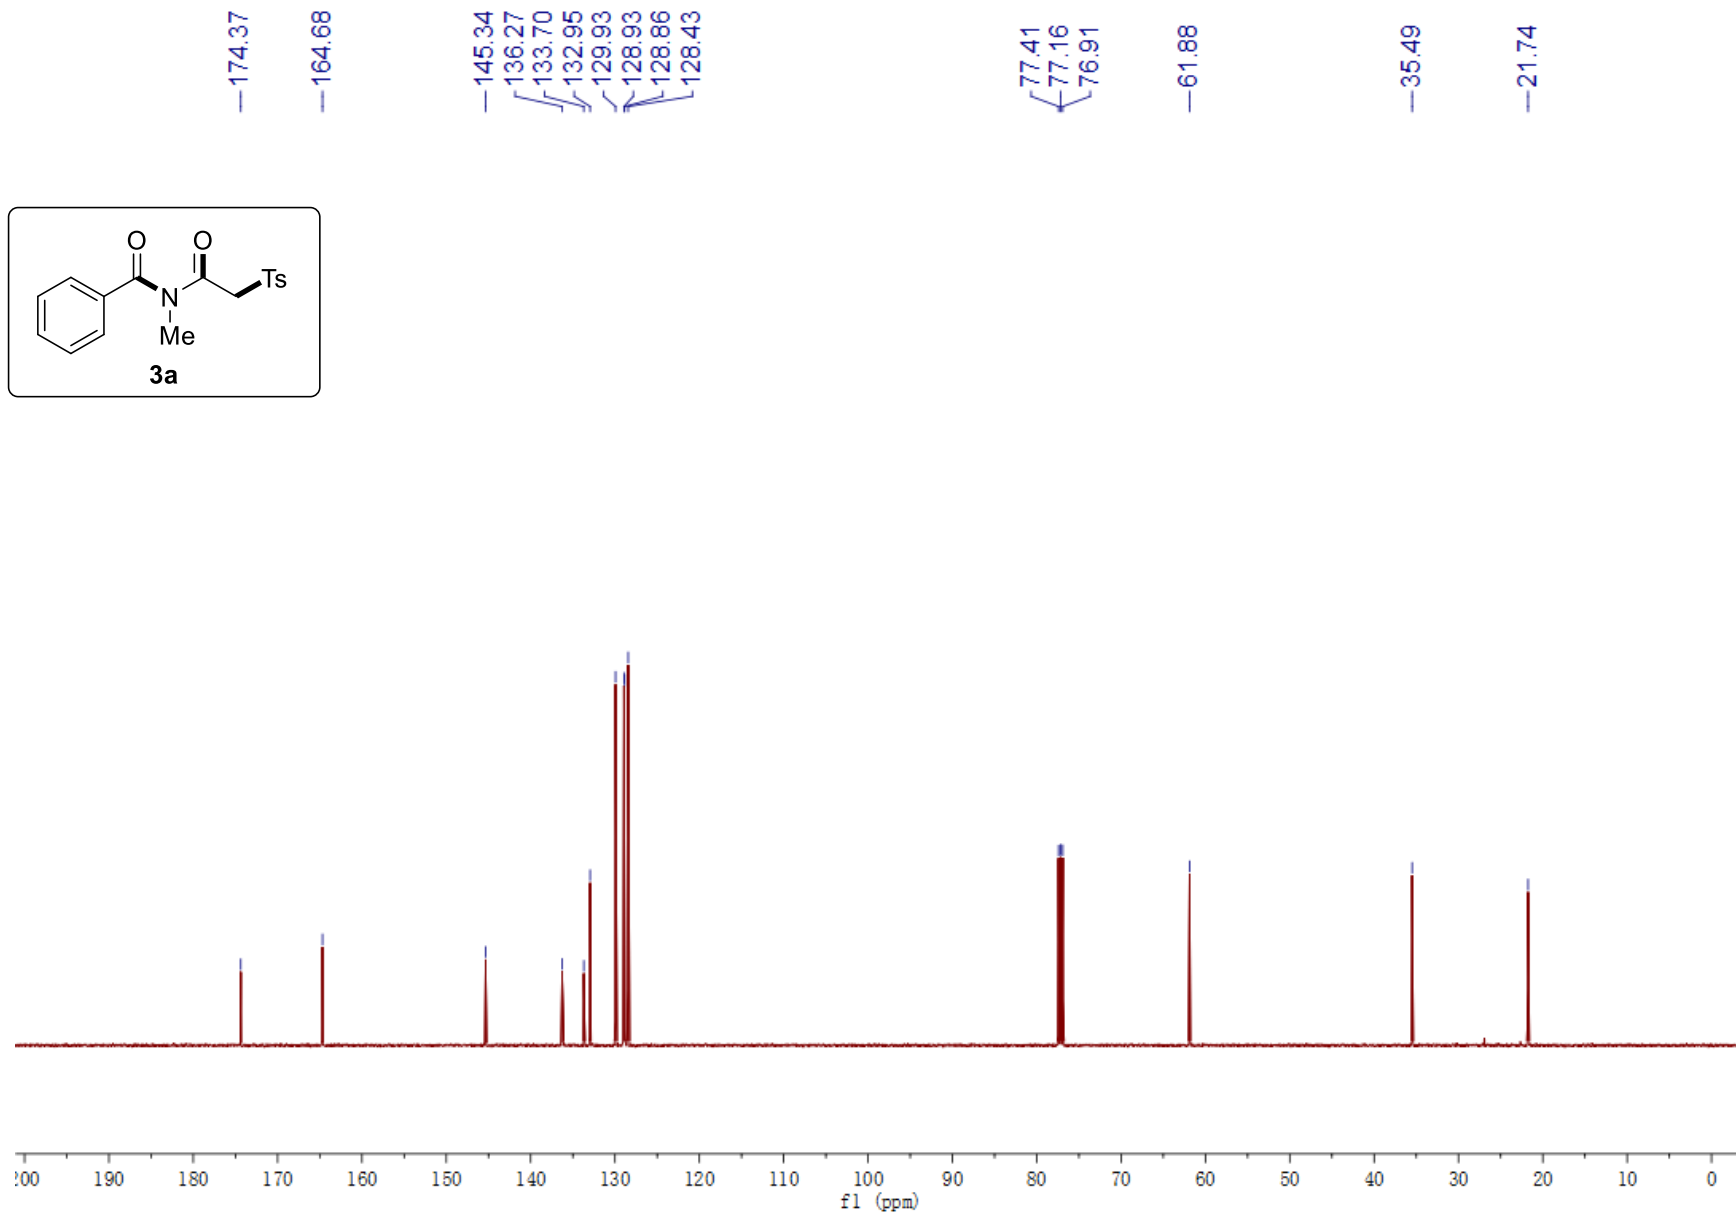

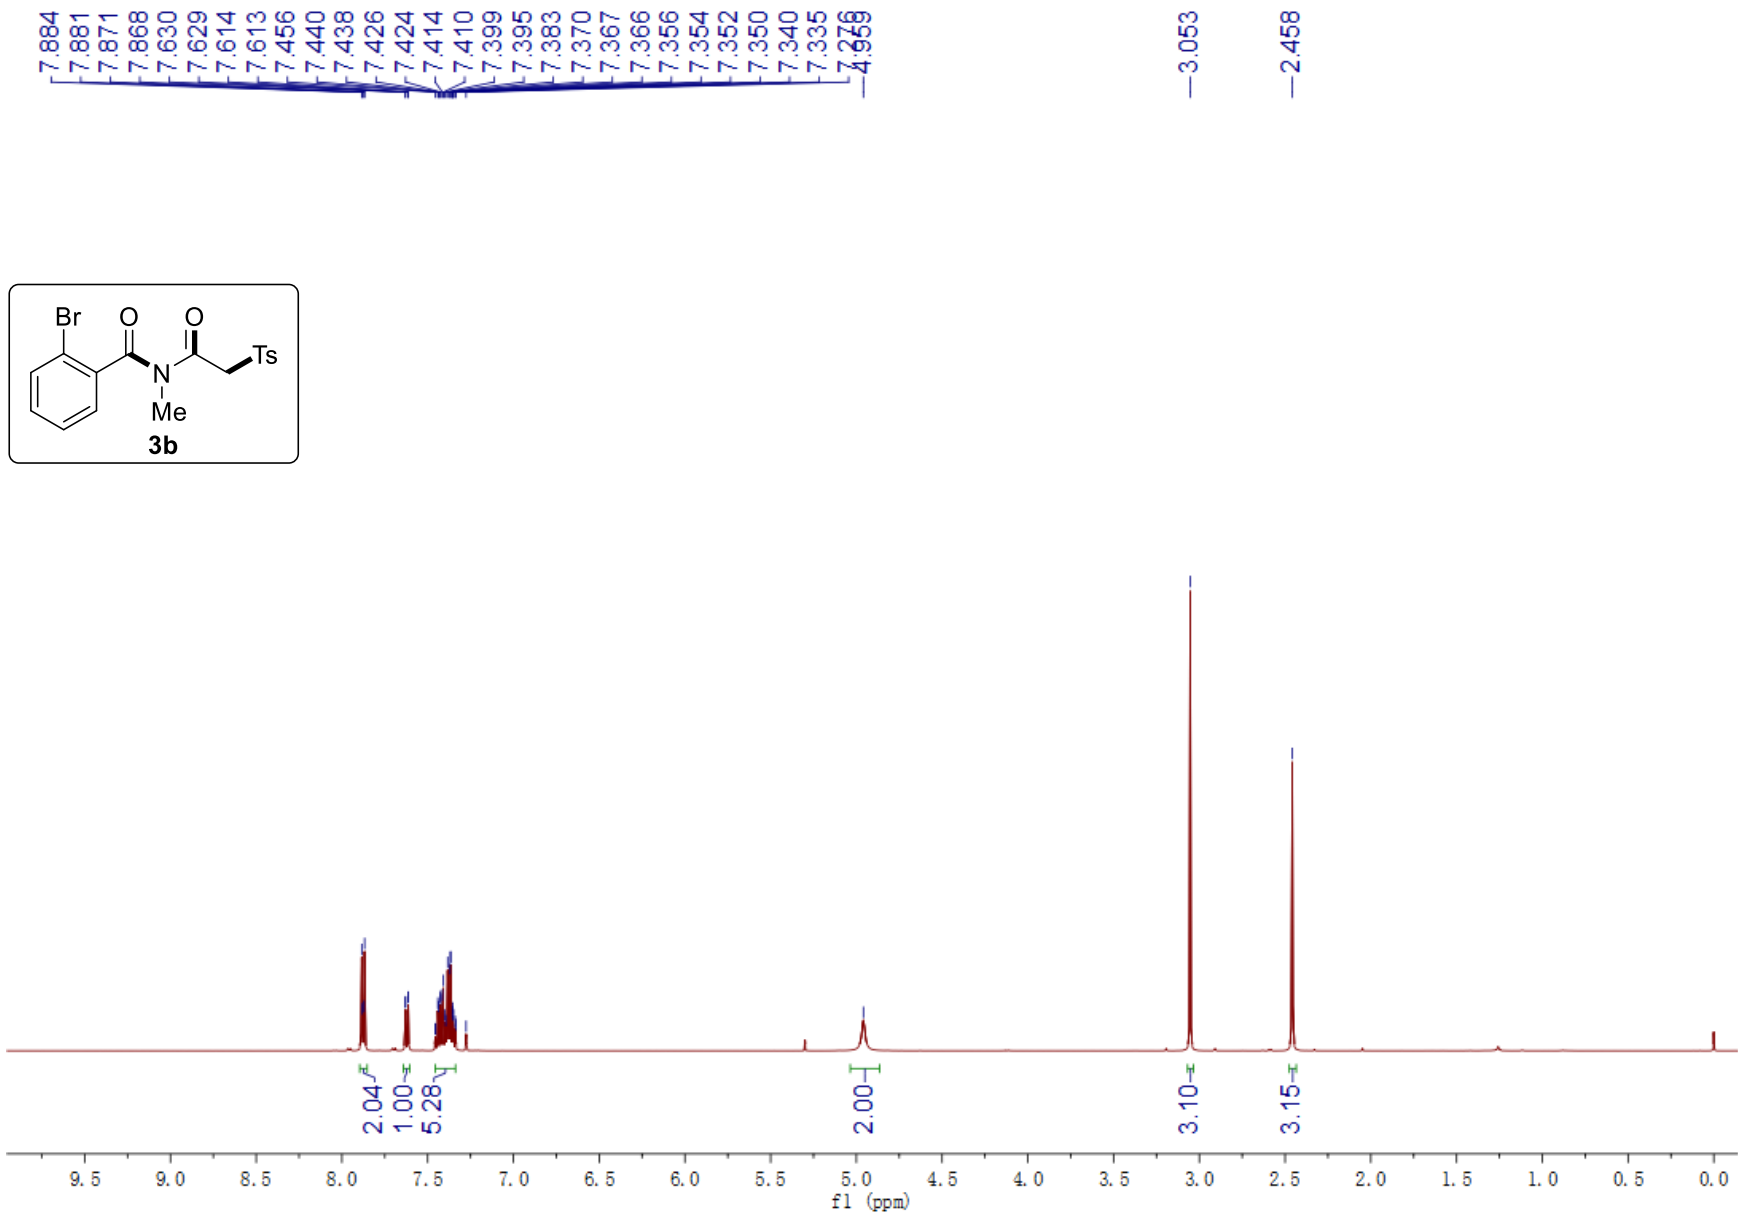

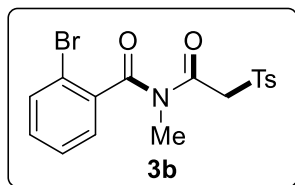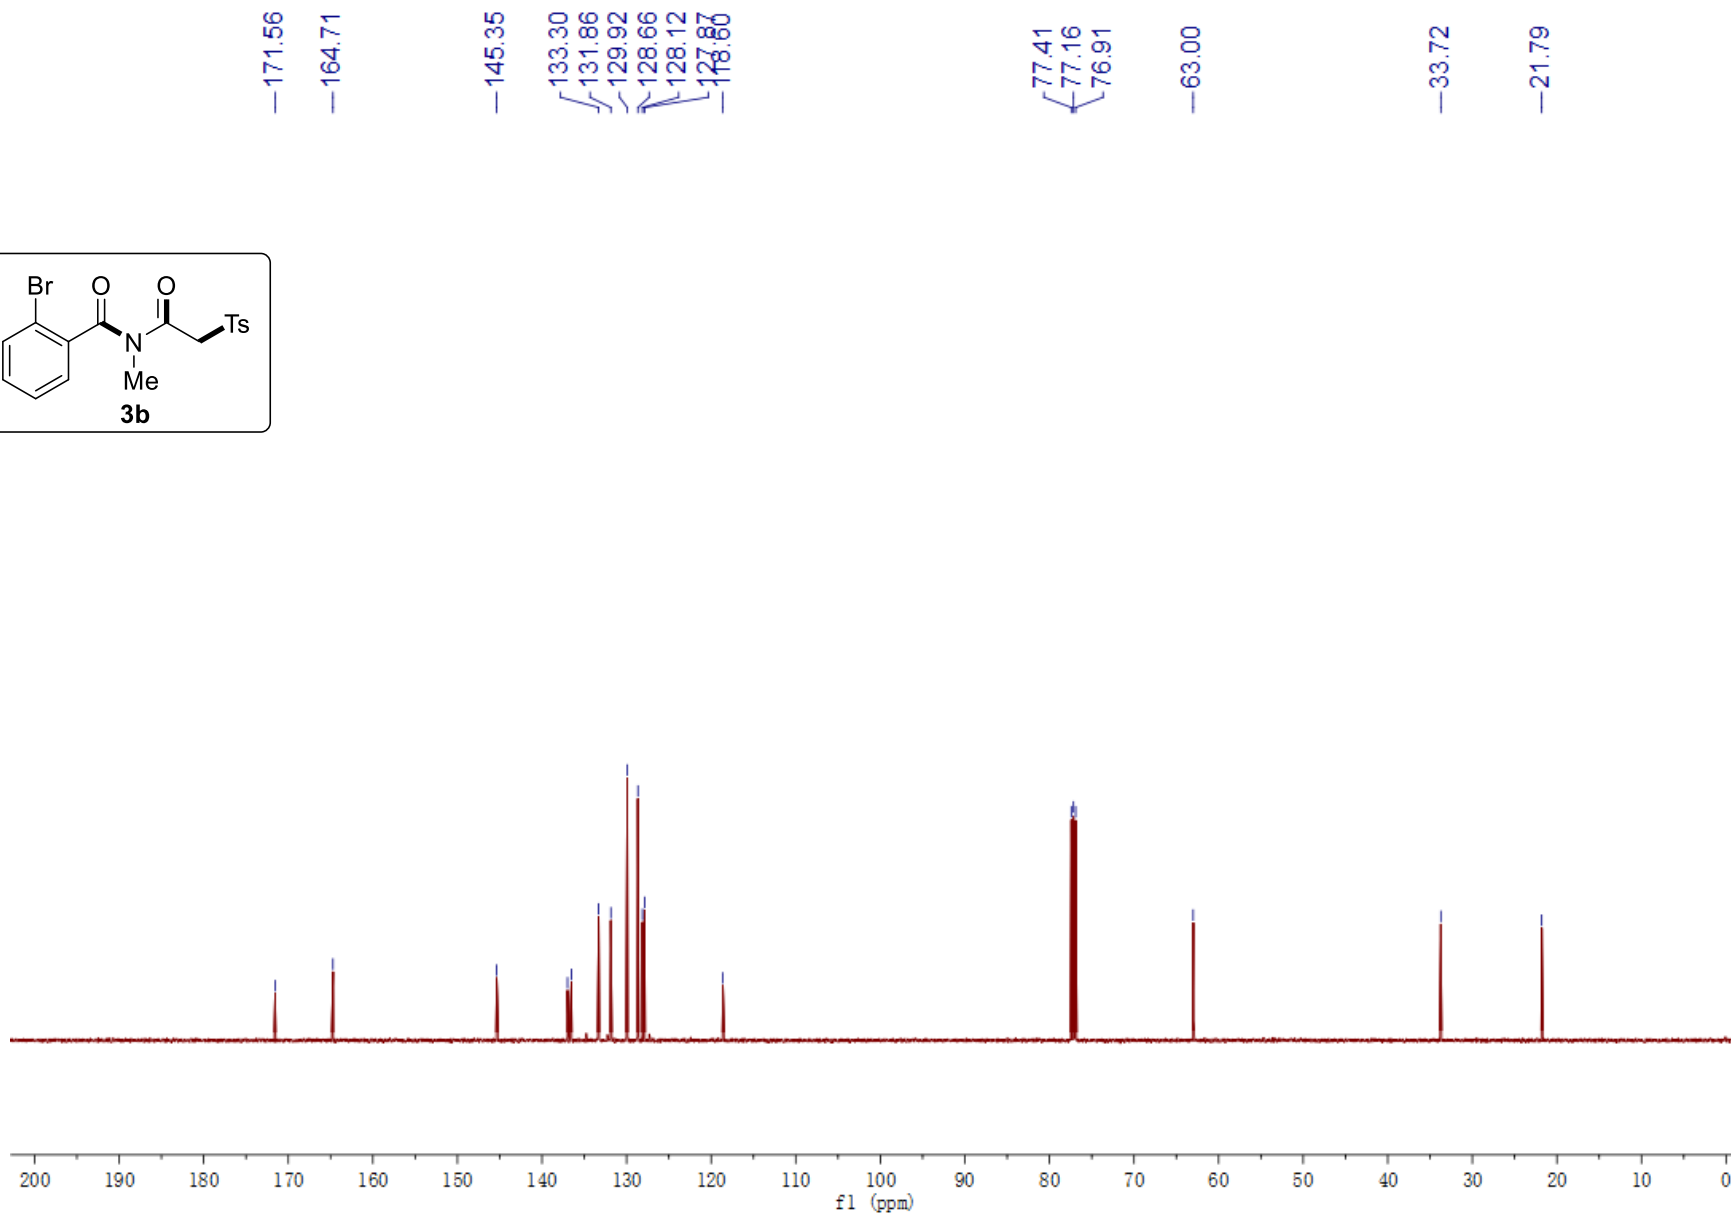

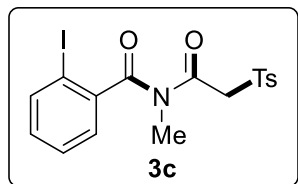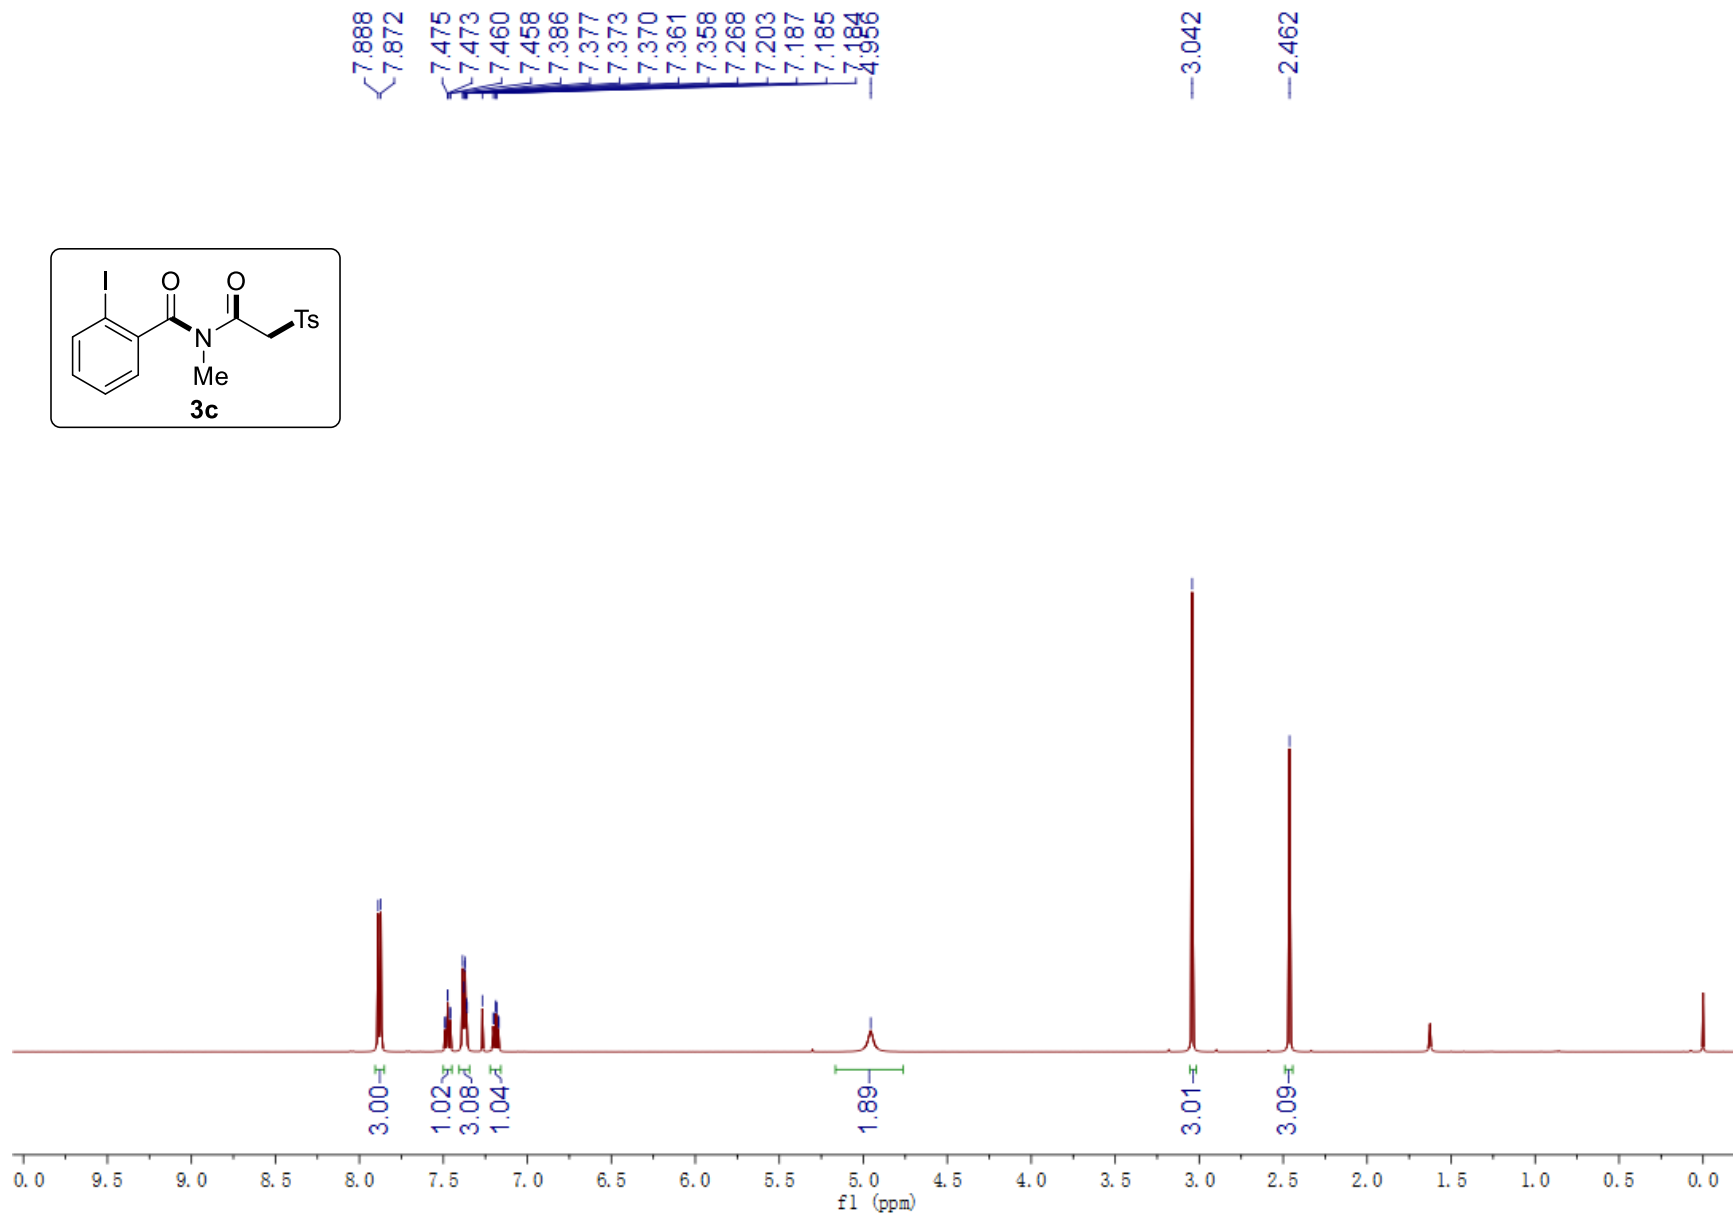

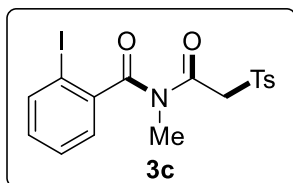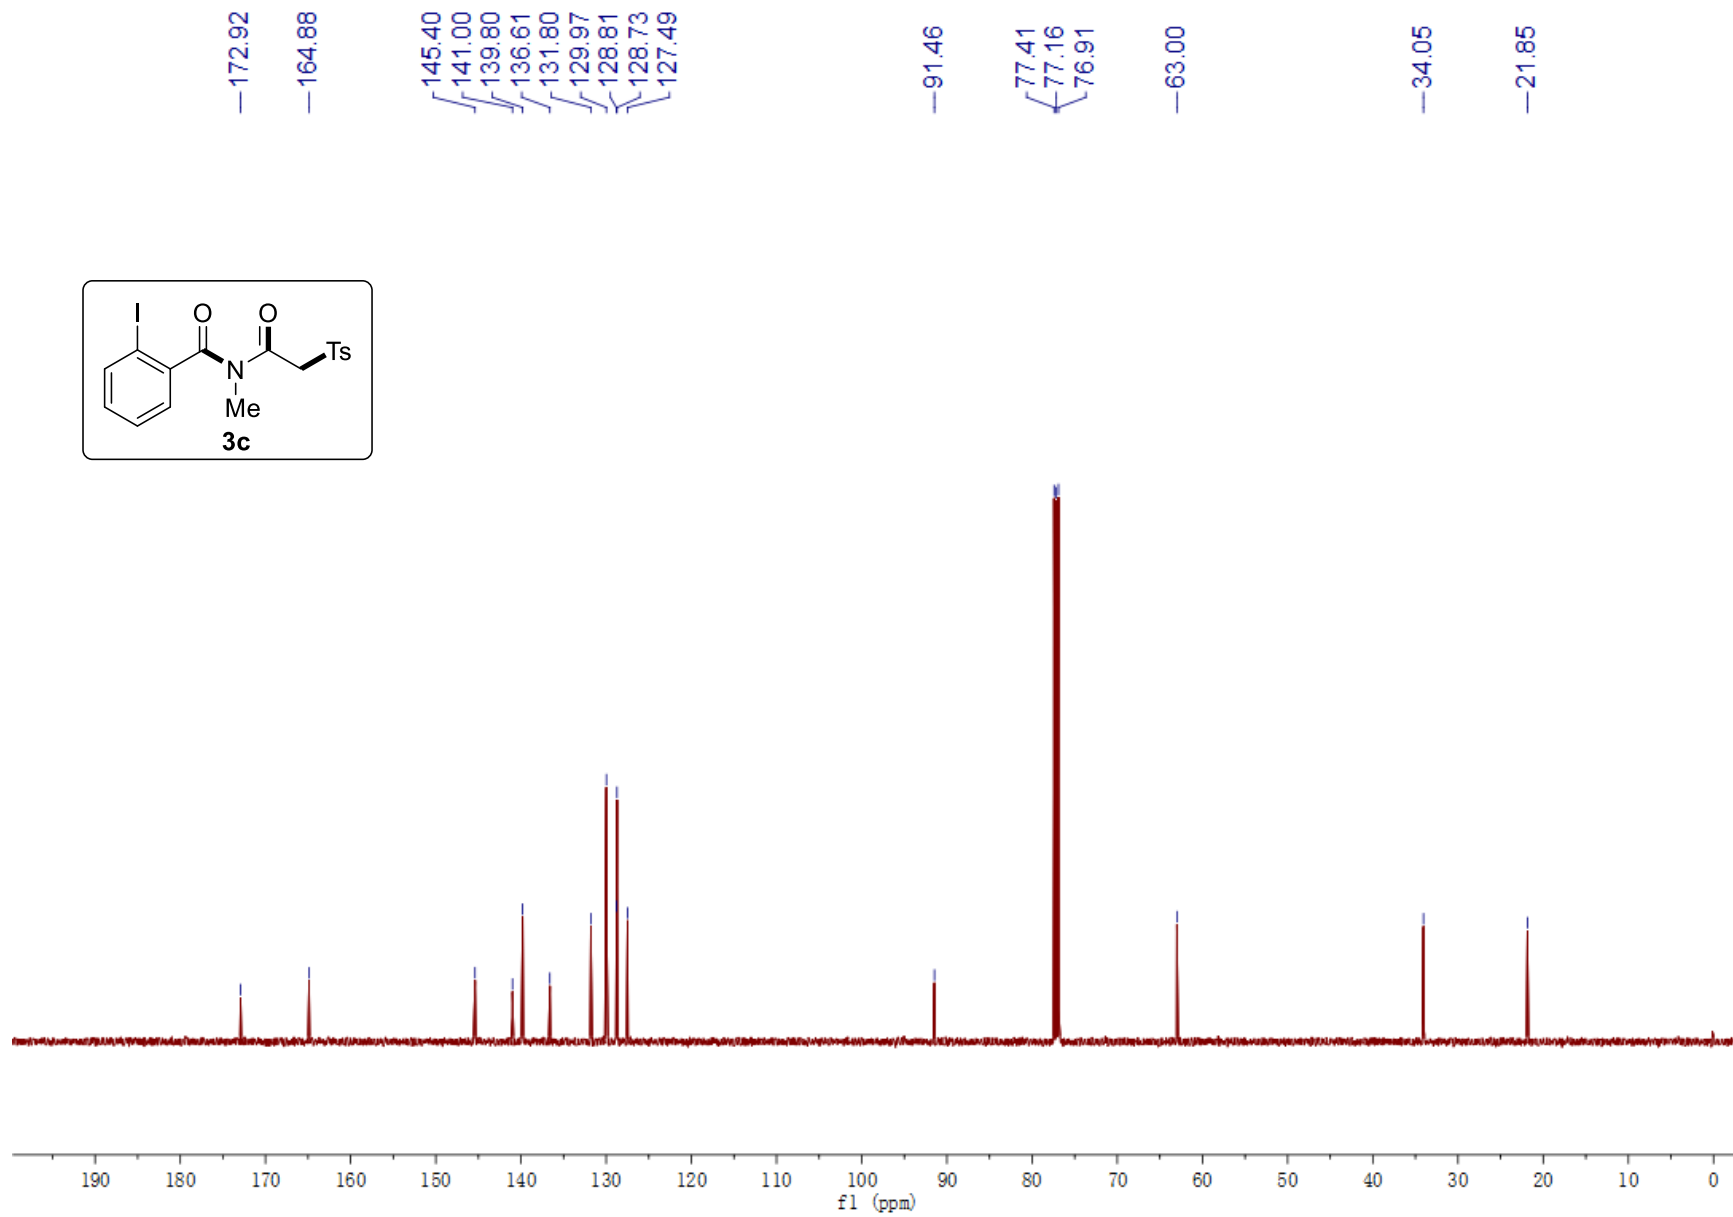

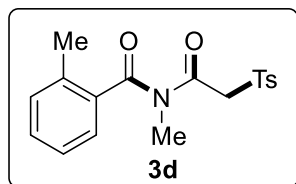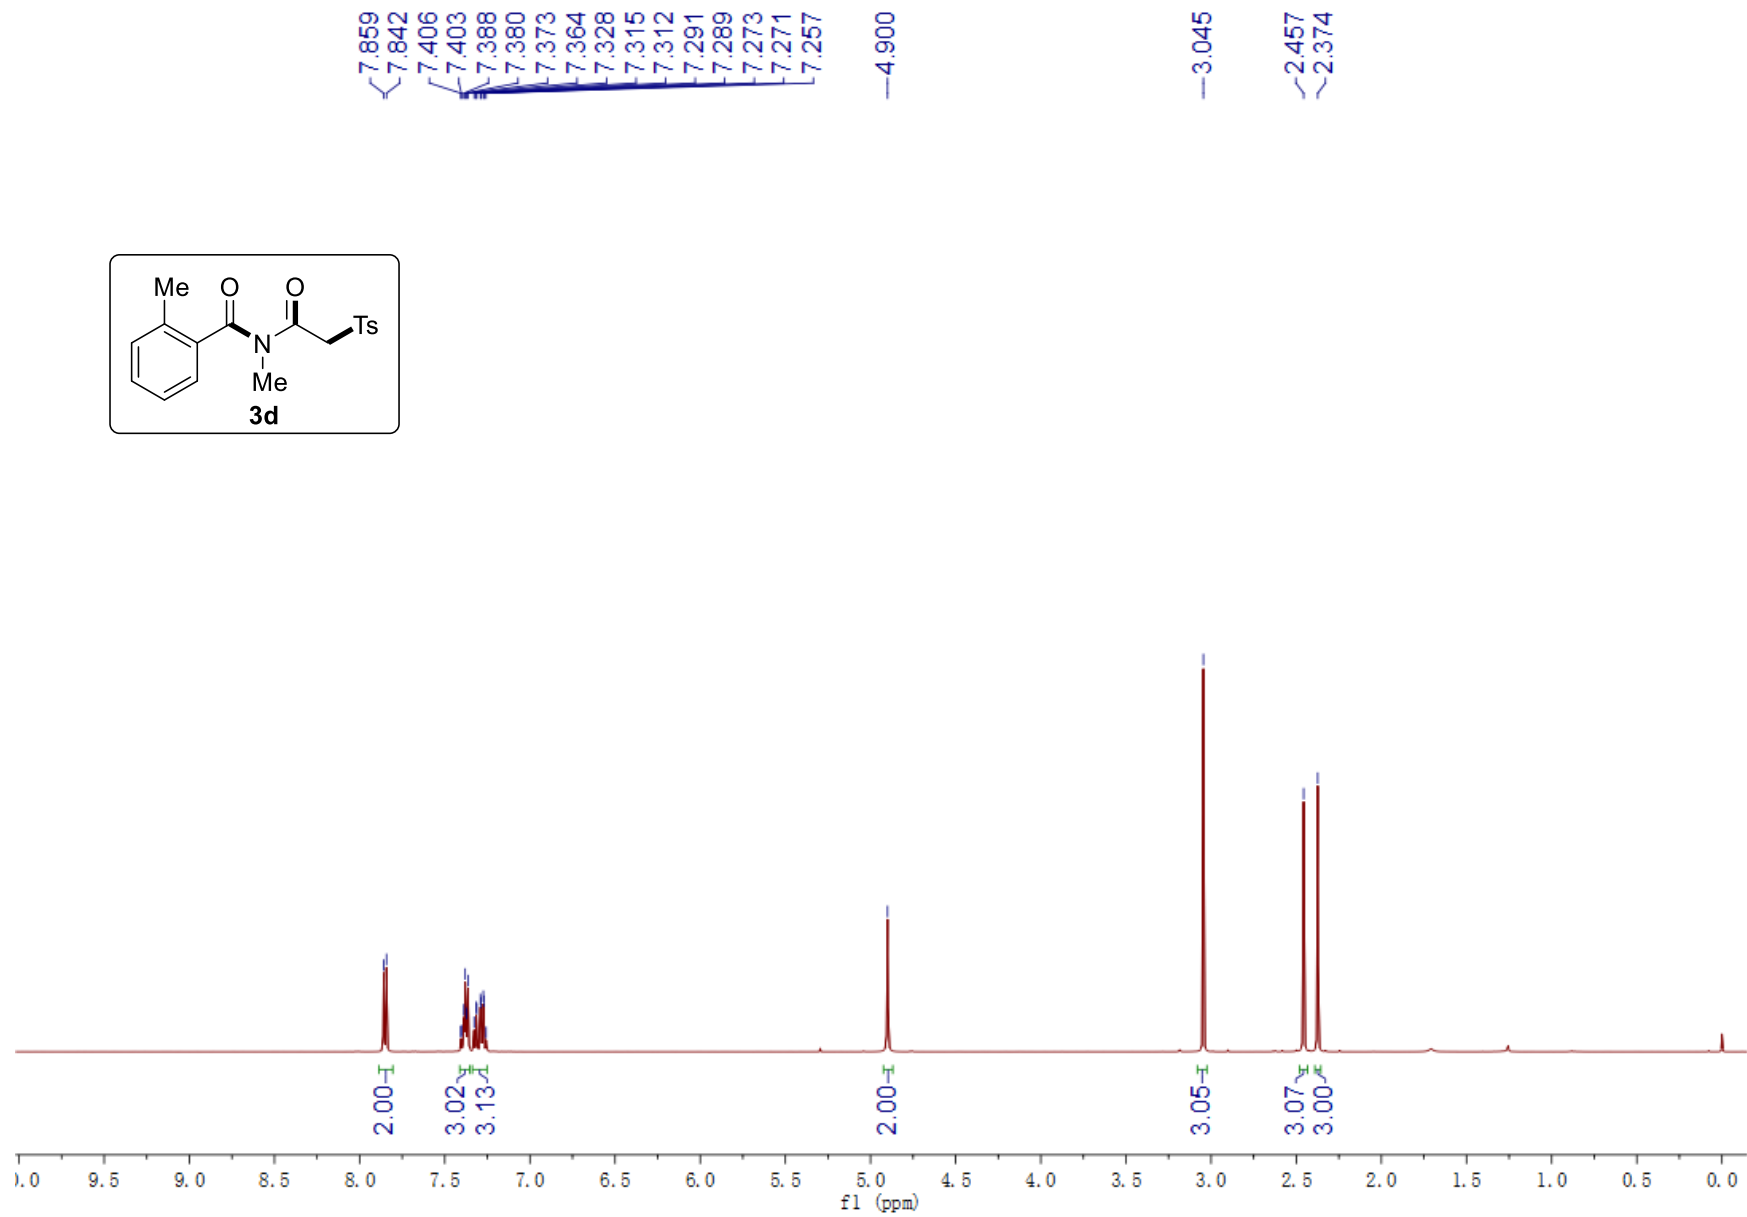

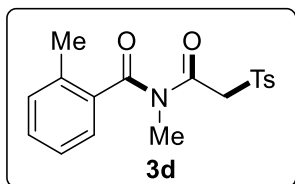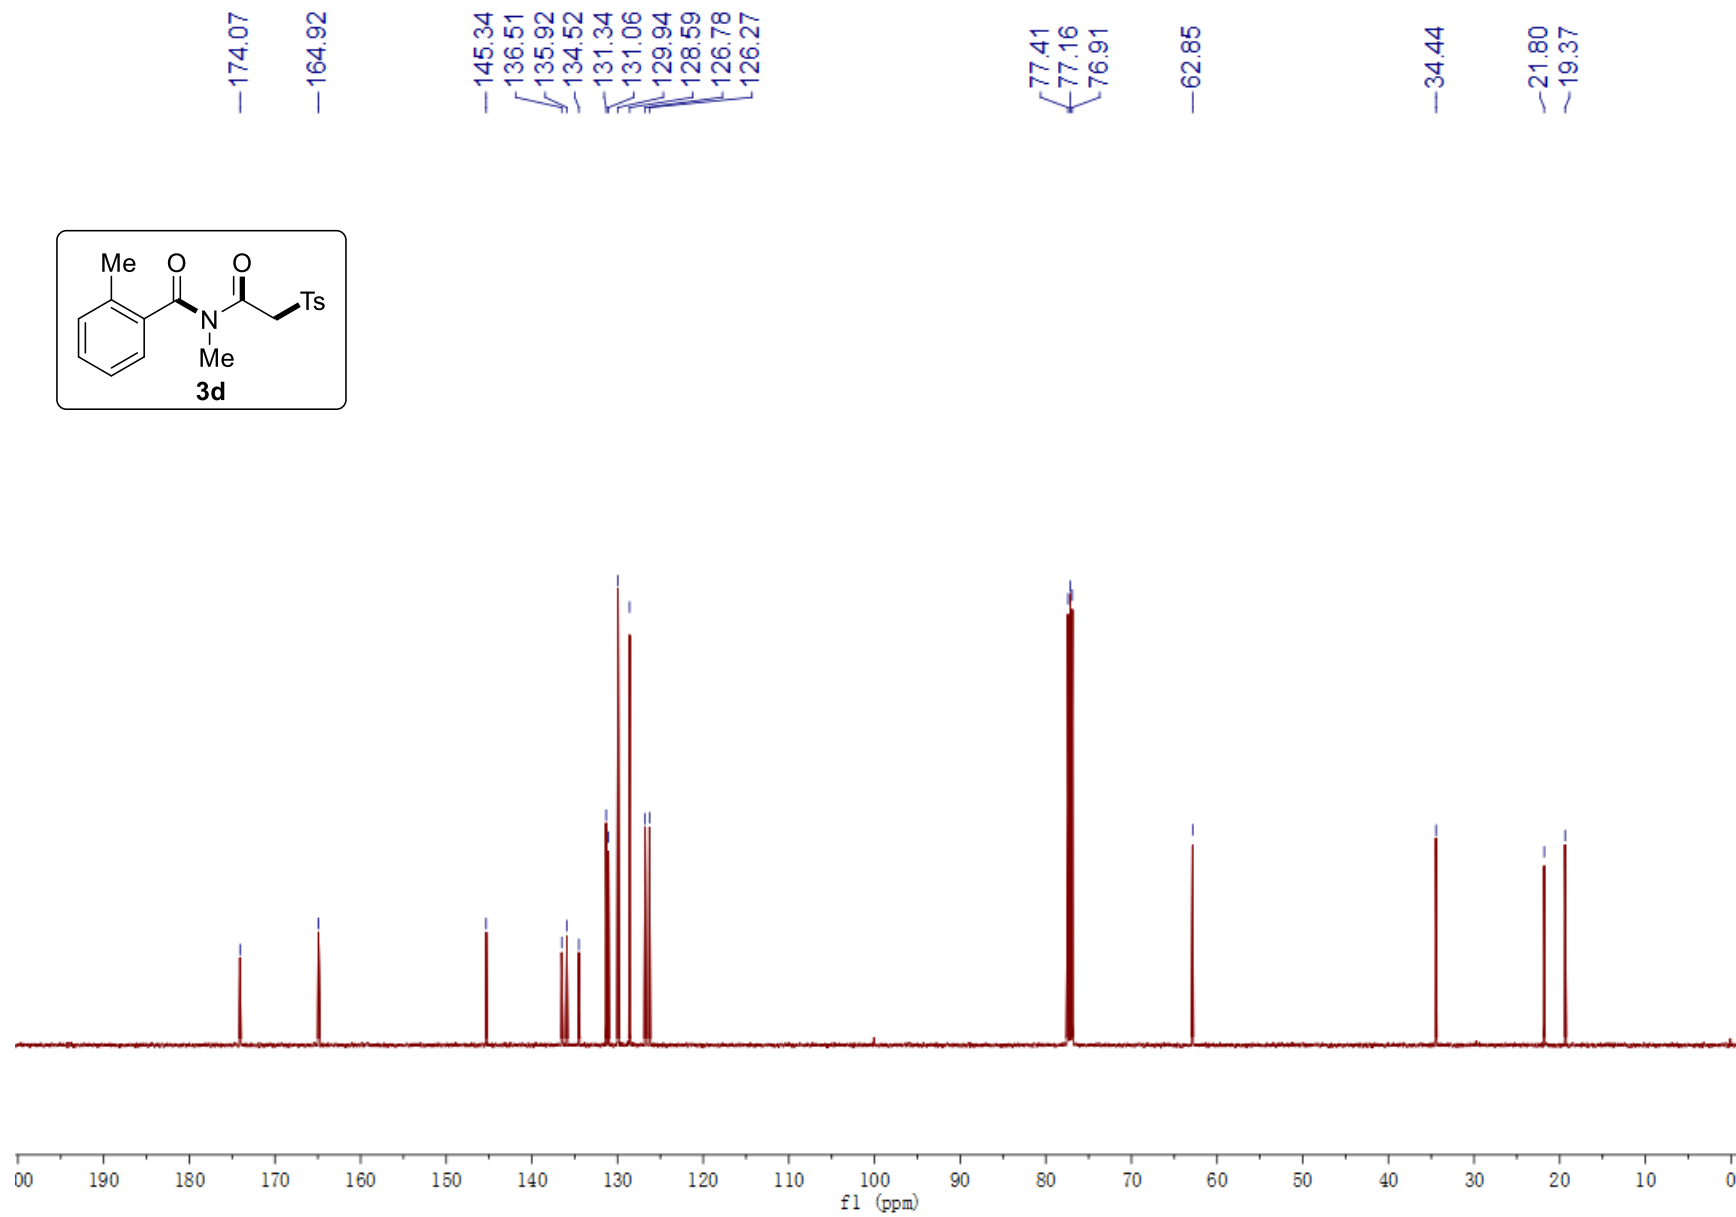



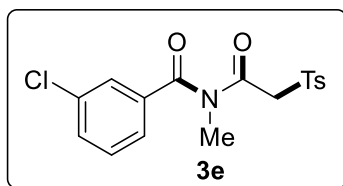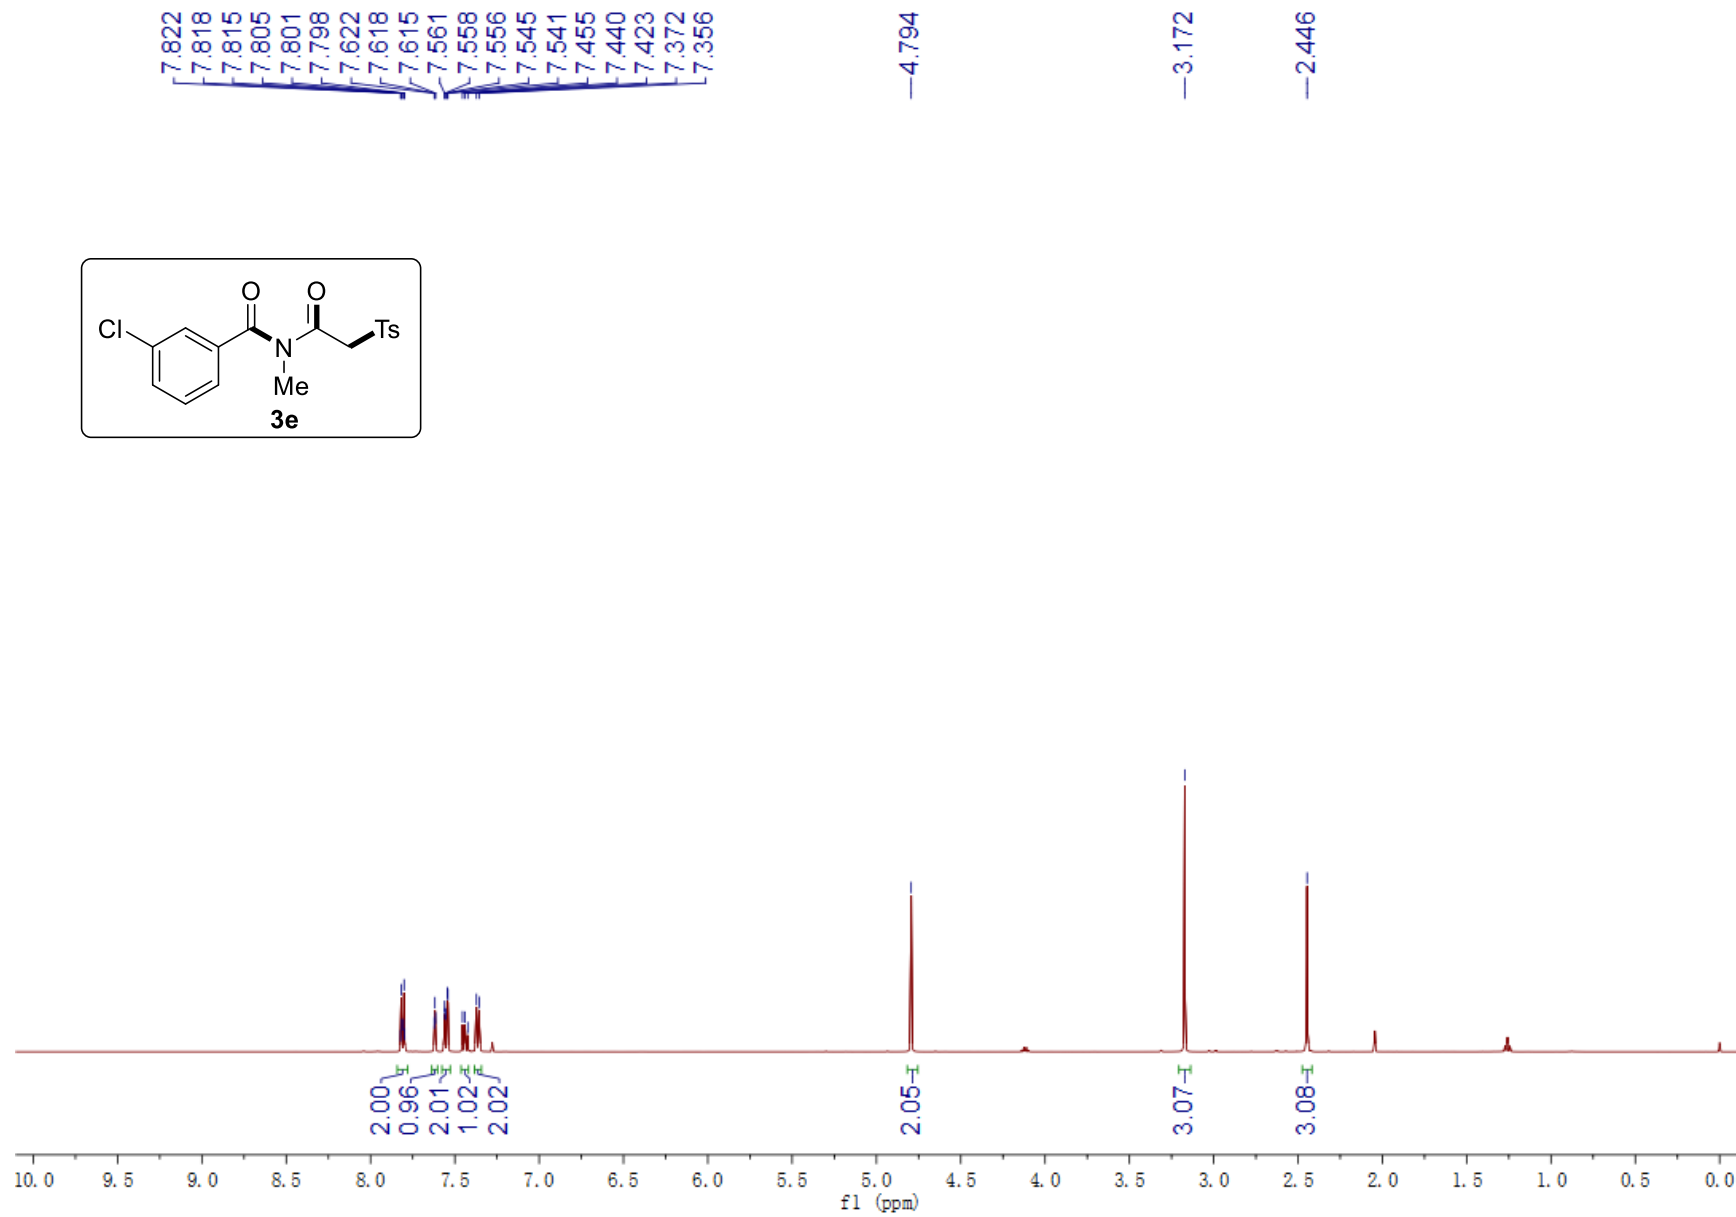

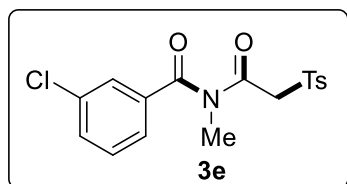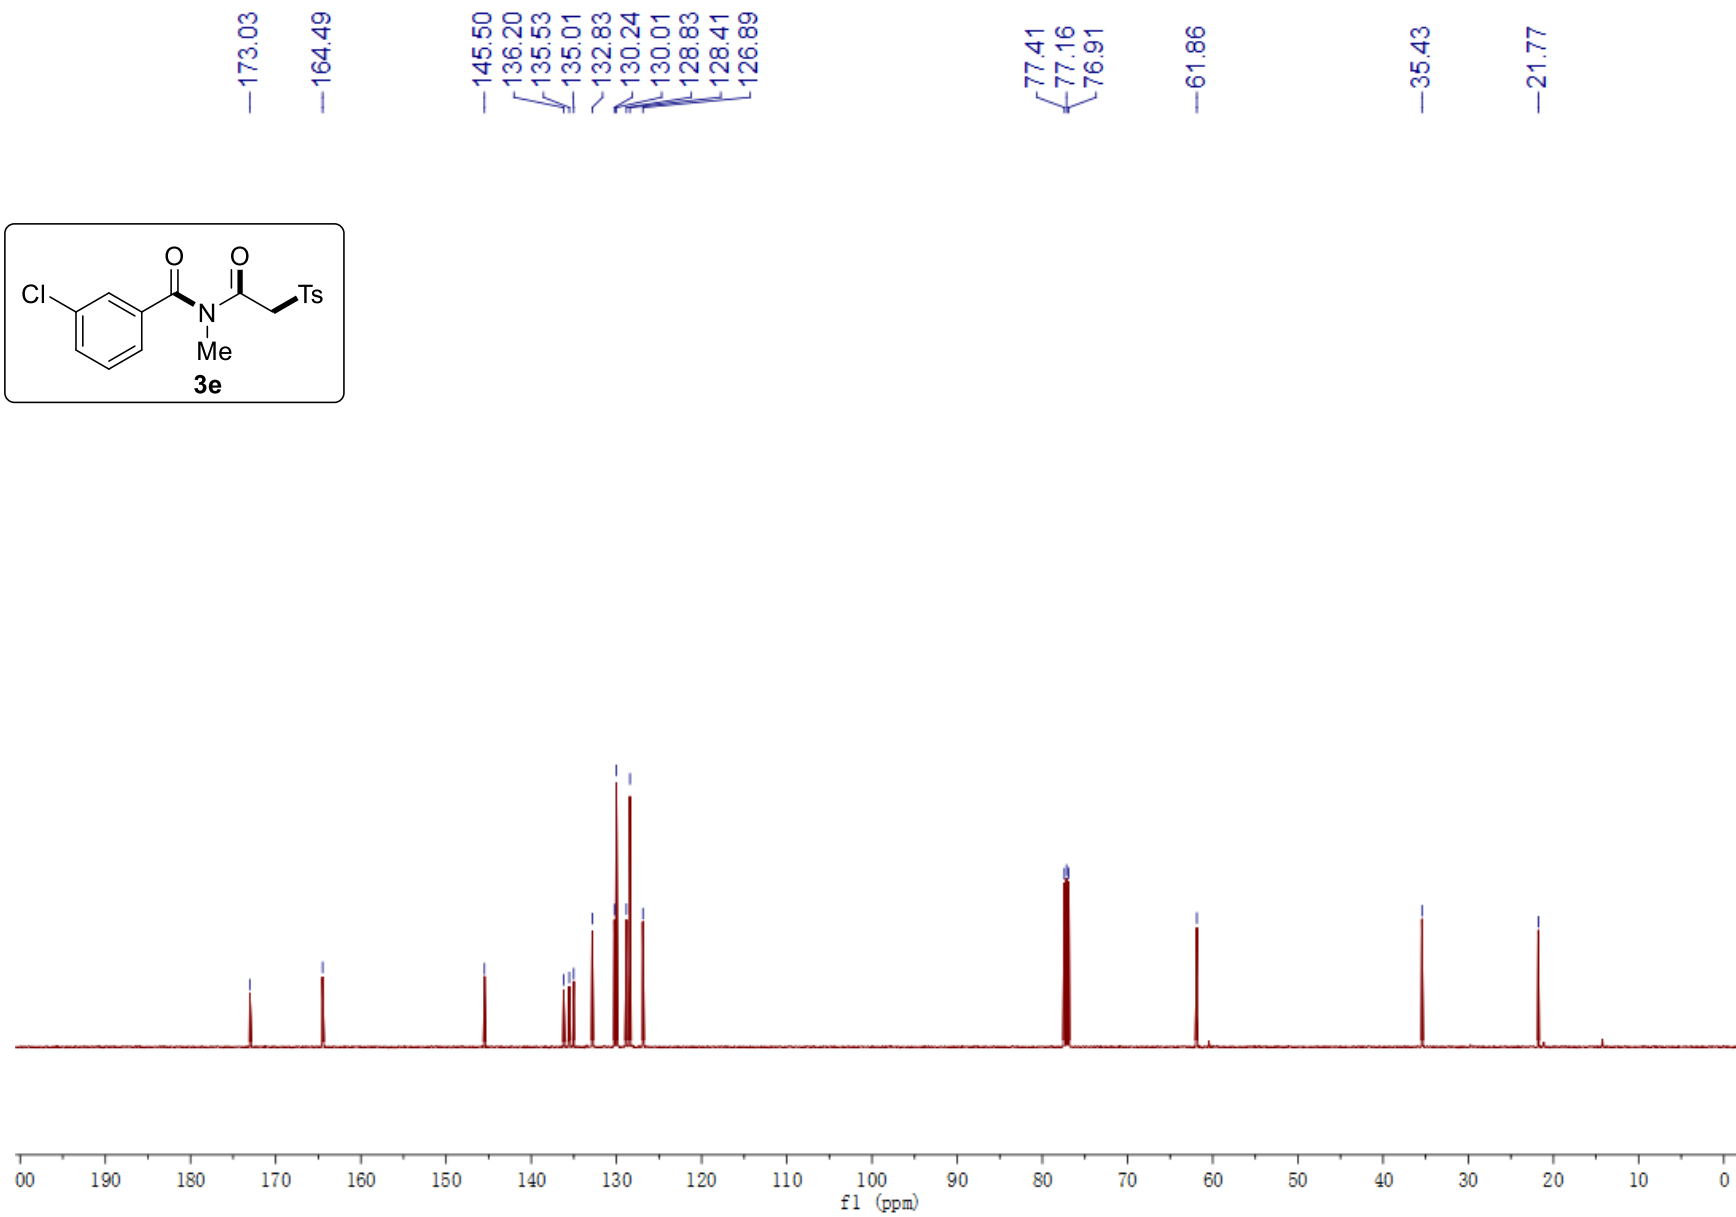

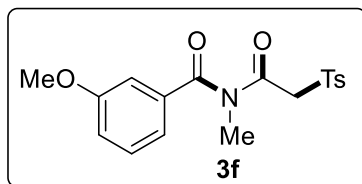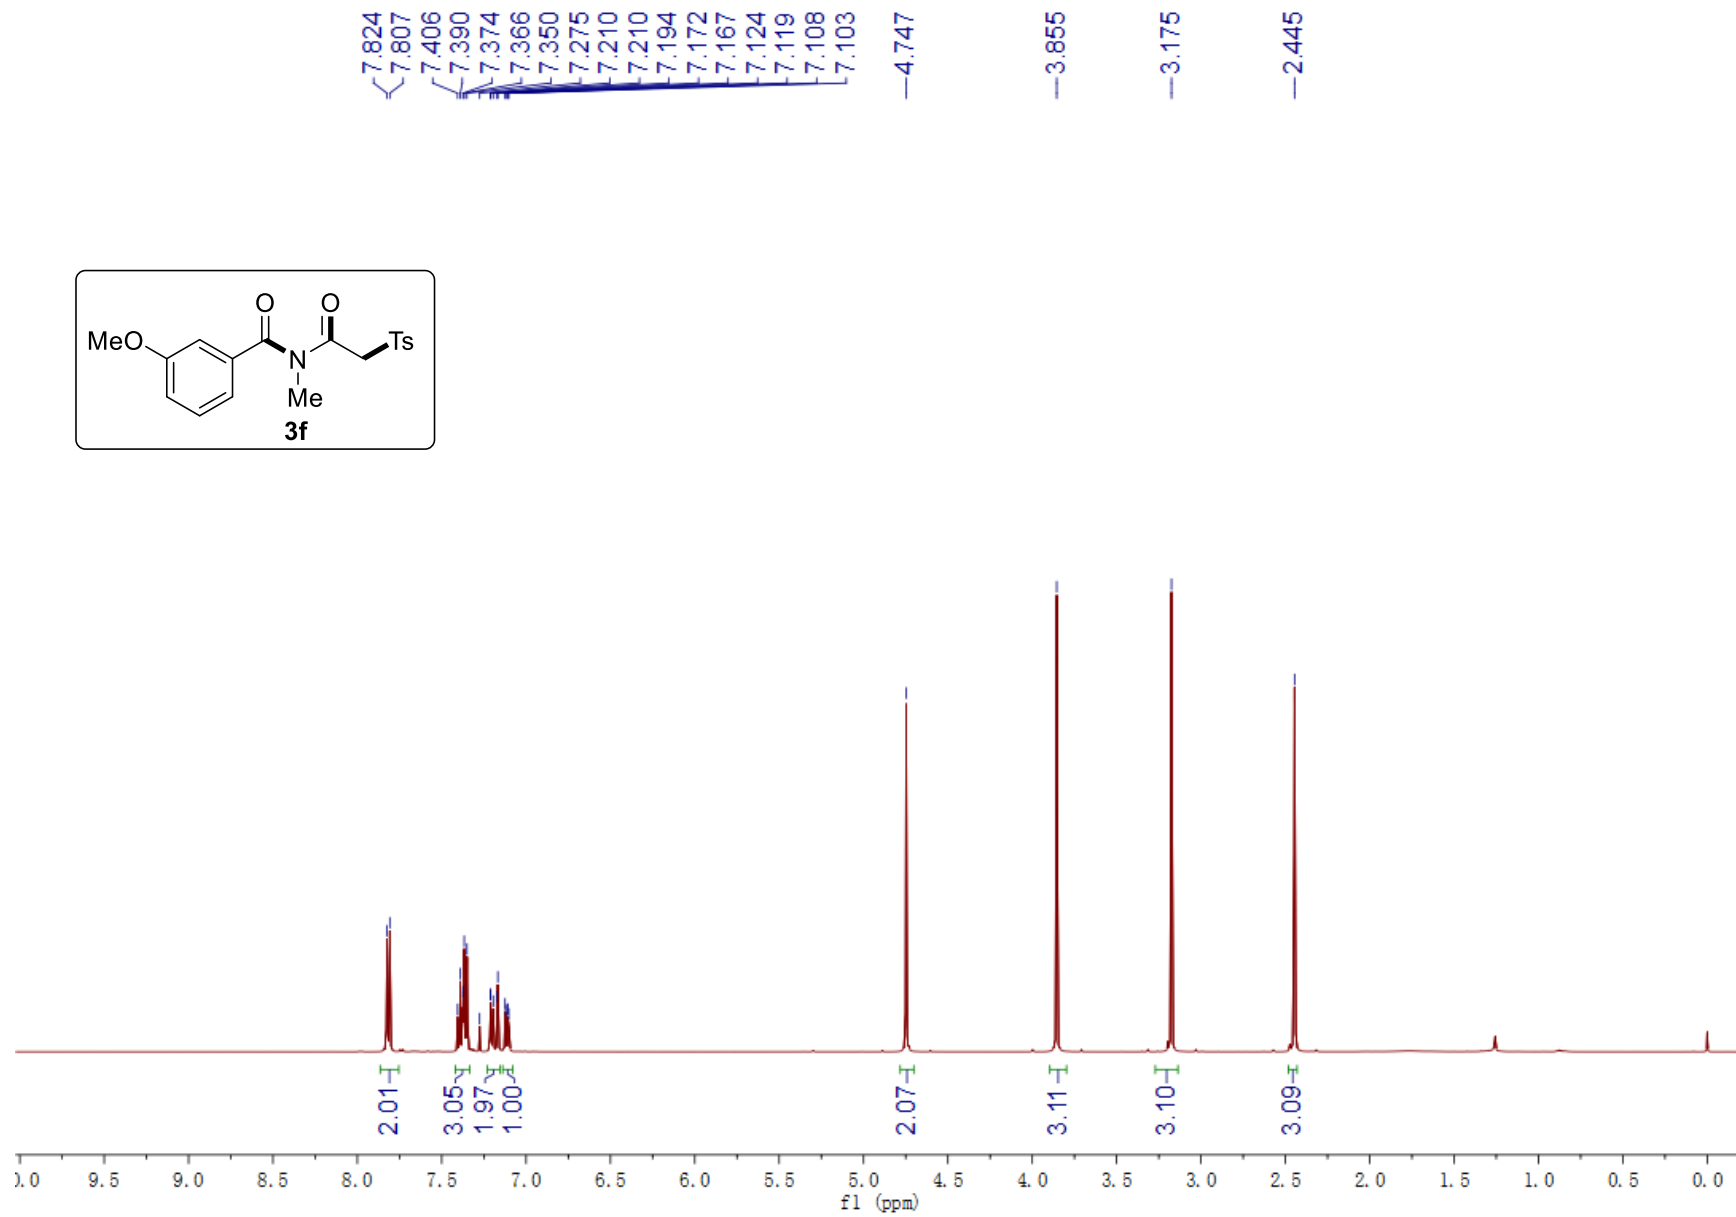

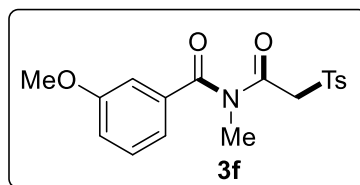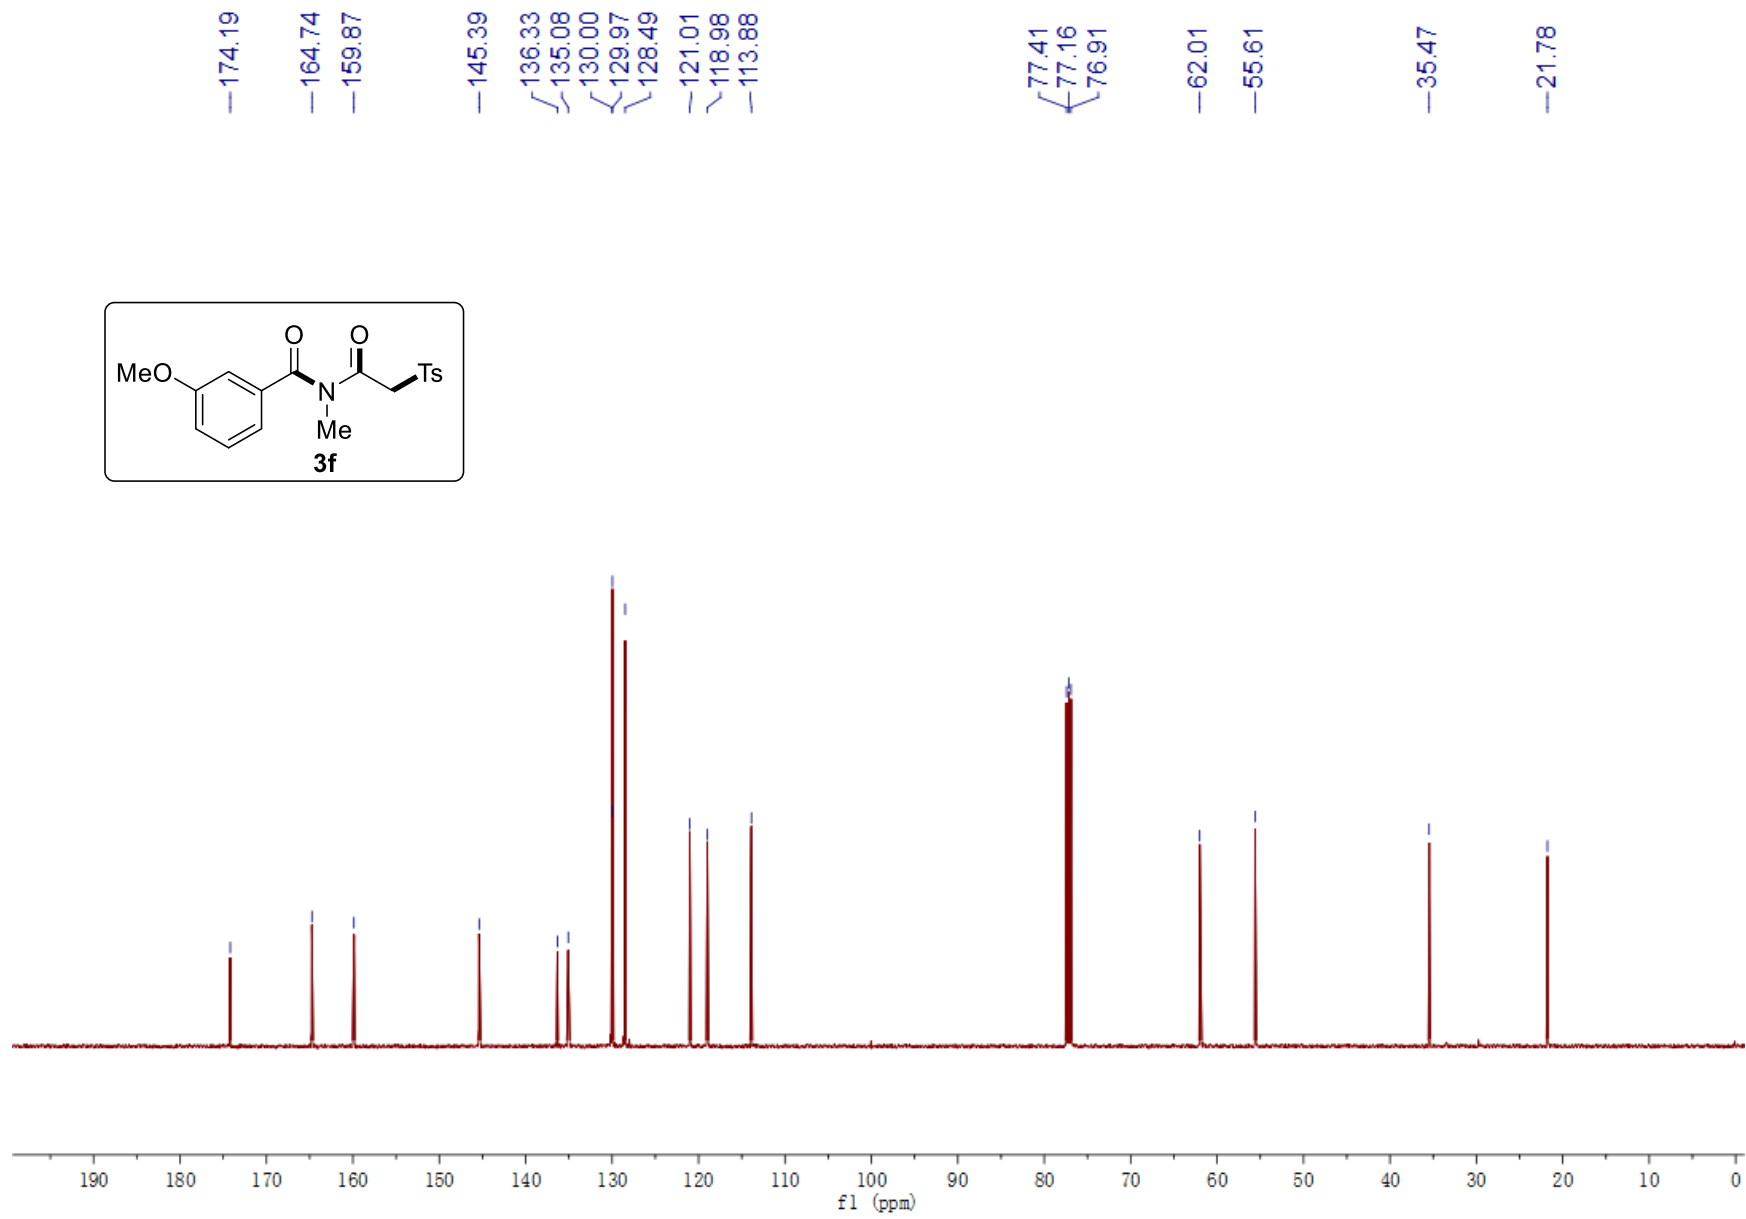

S68

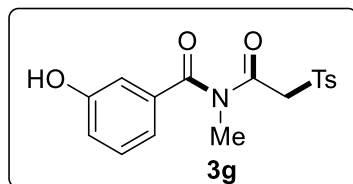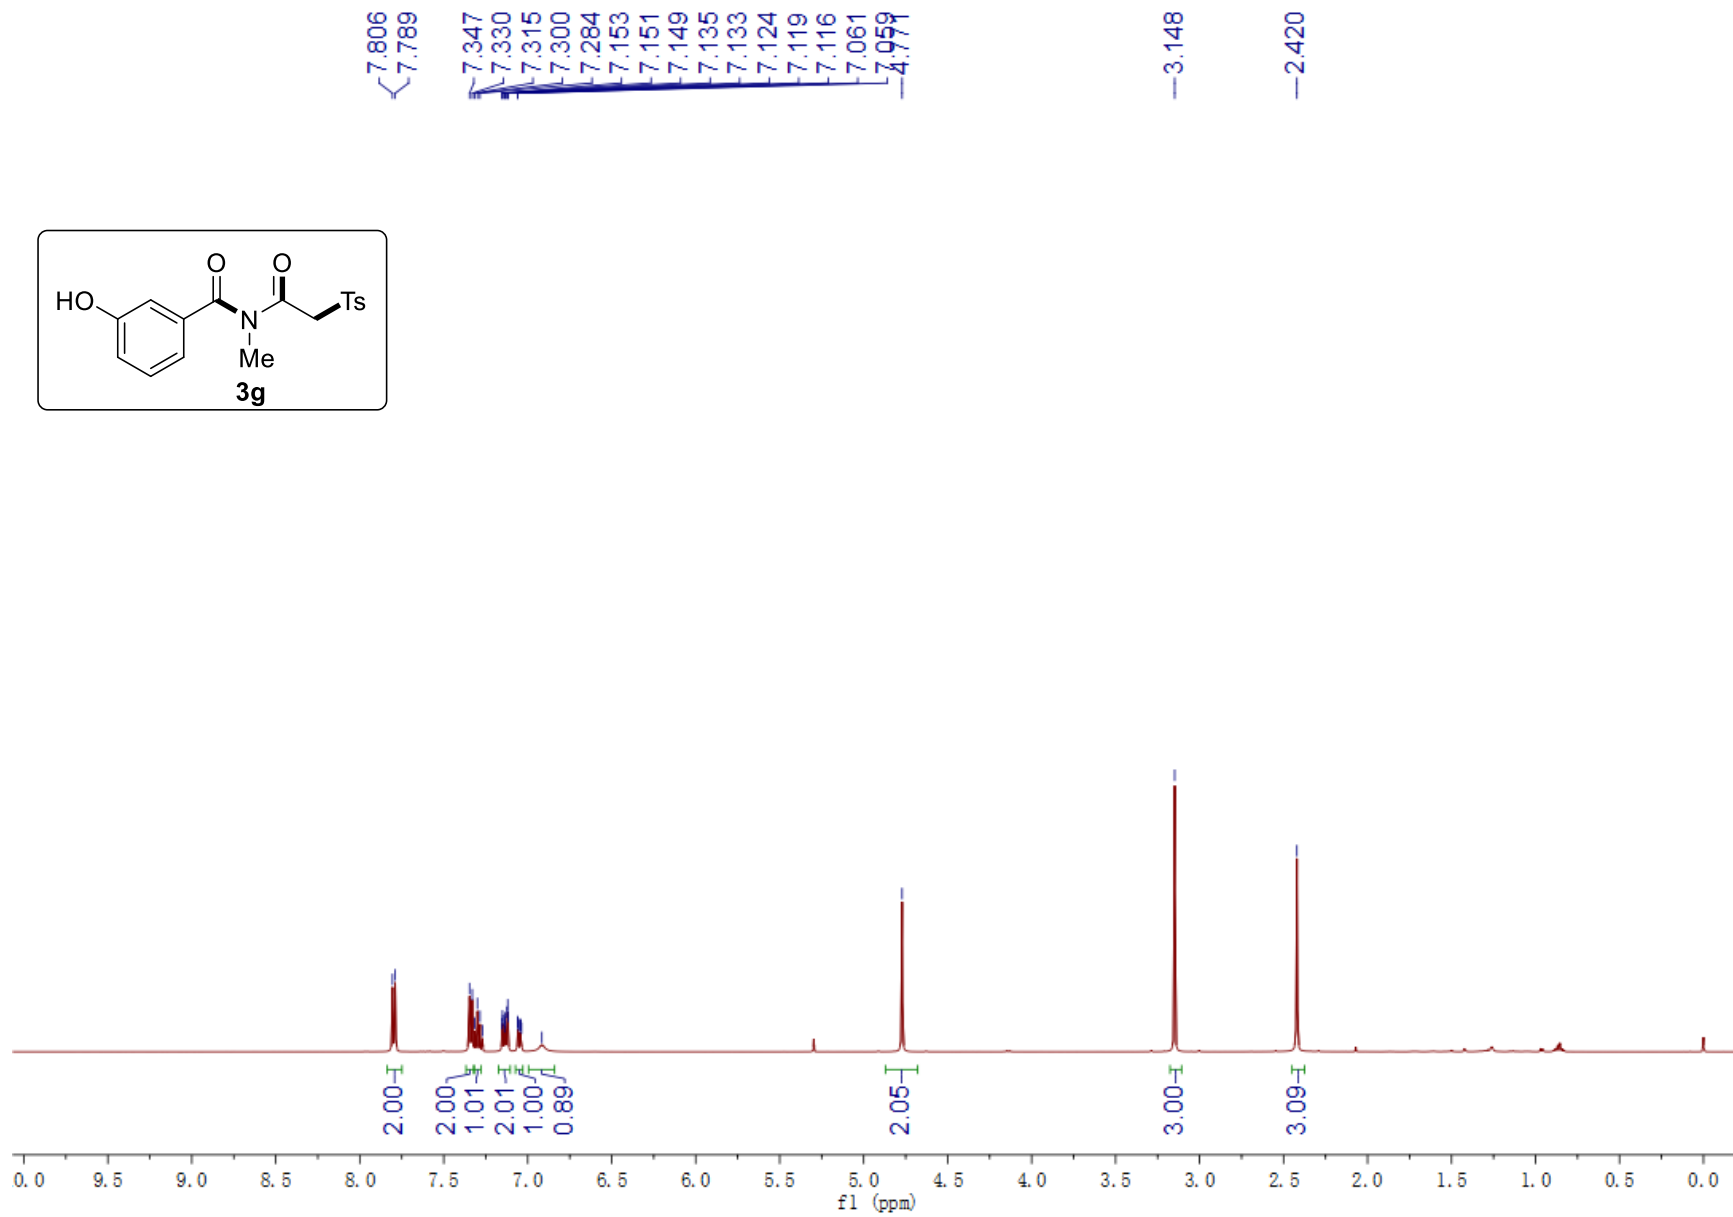

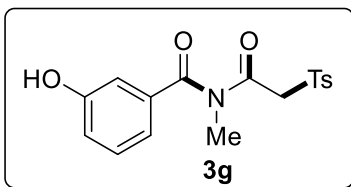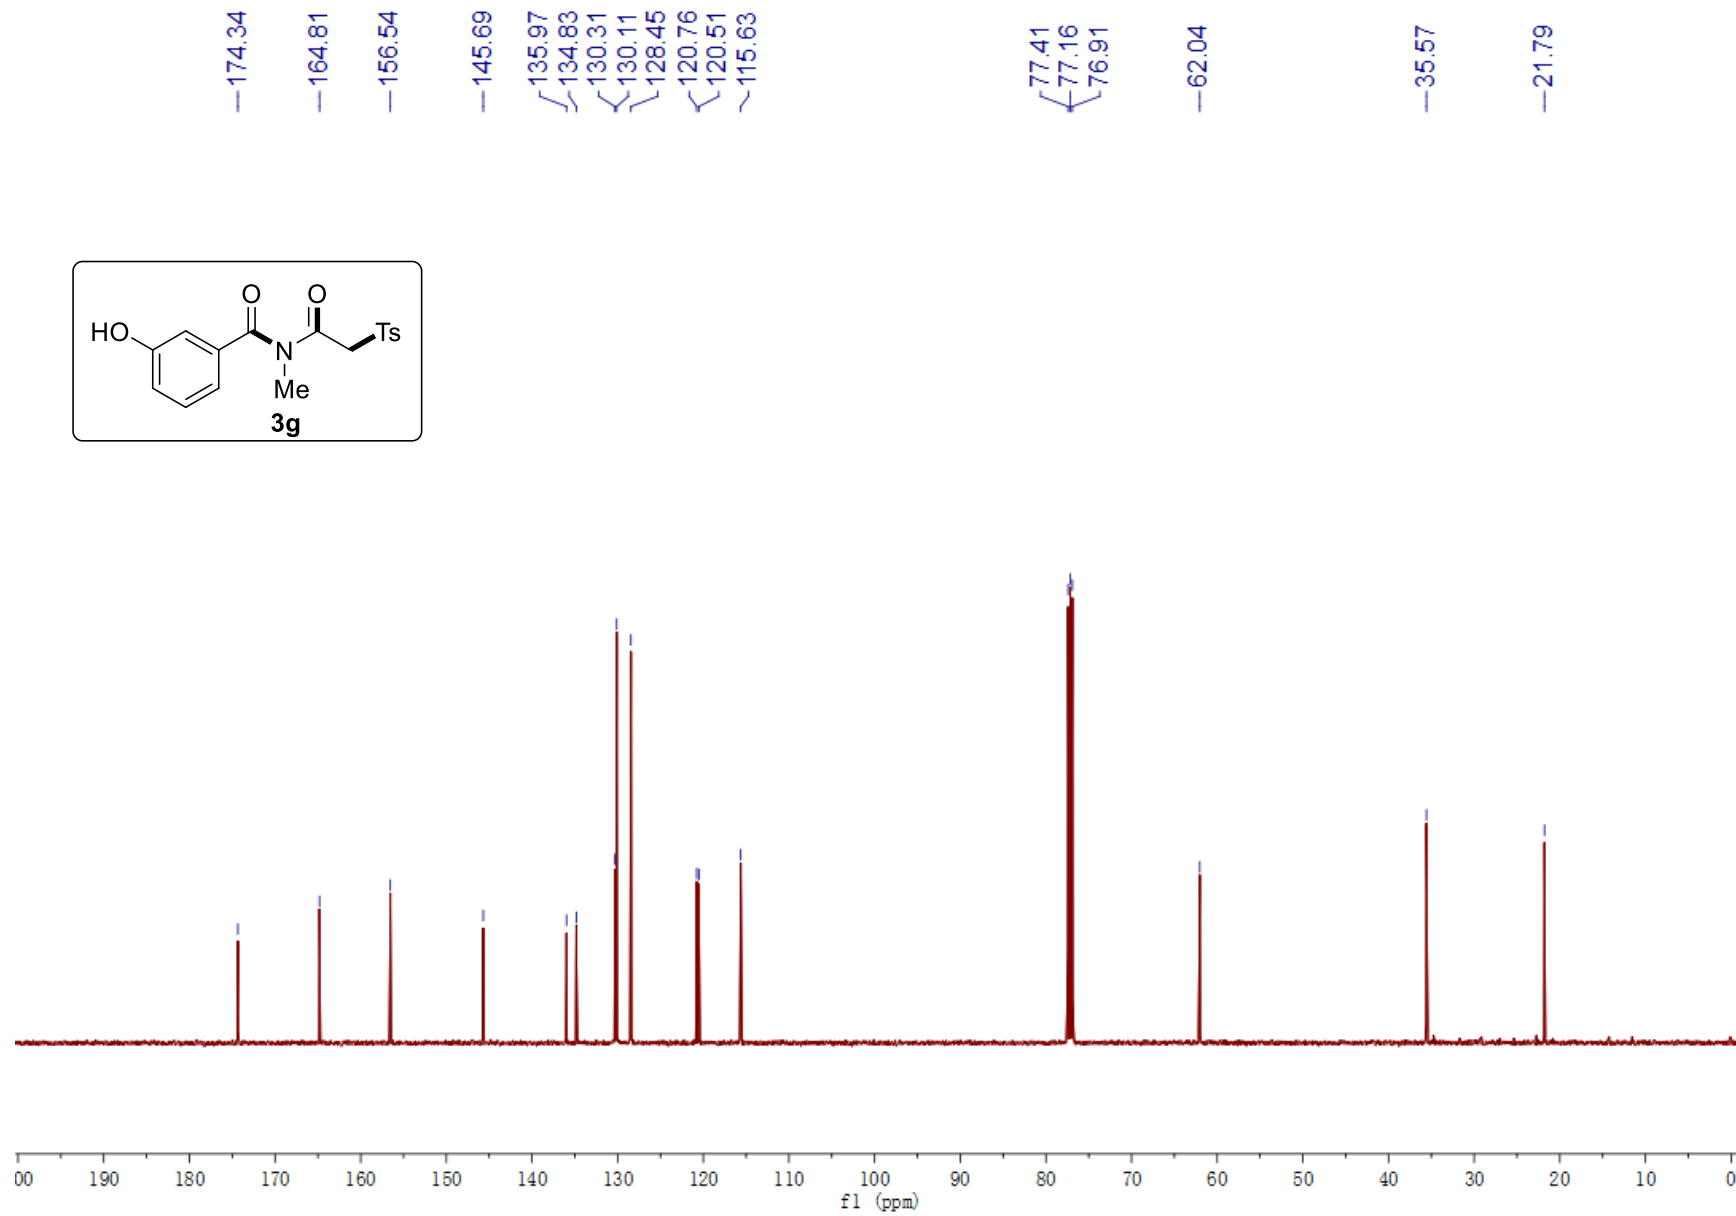

8.312  
8.308  
8.304  
8.261  
8.258  
8.254  
8.242  
8.238  
8.235  
7.886  
7.882  
7.879  
7.867  
7.863  
7.859  
7.832  
7.812  
7.616  
7.597  
7.577  
7.372  
7.352  
7.285

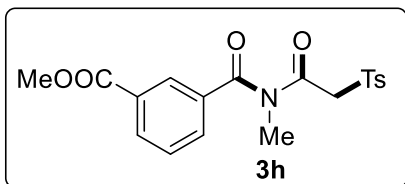

—4.810  
—3.963  
—3.185  
—2.440

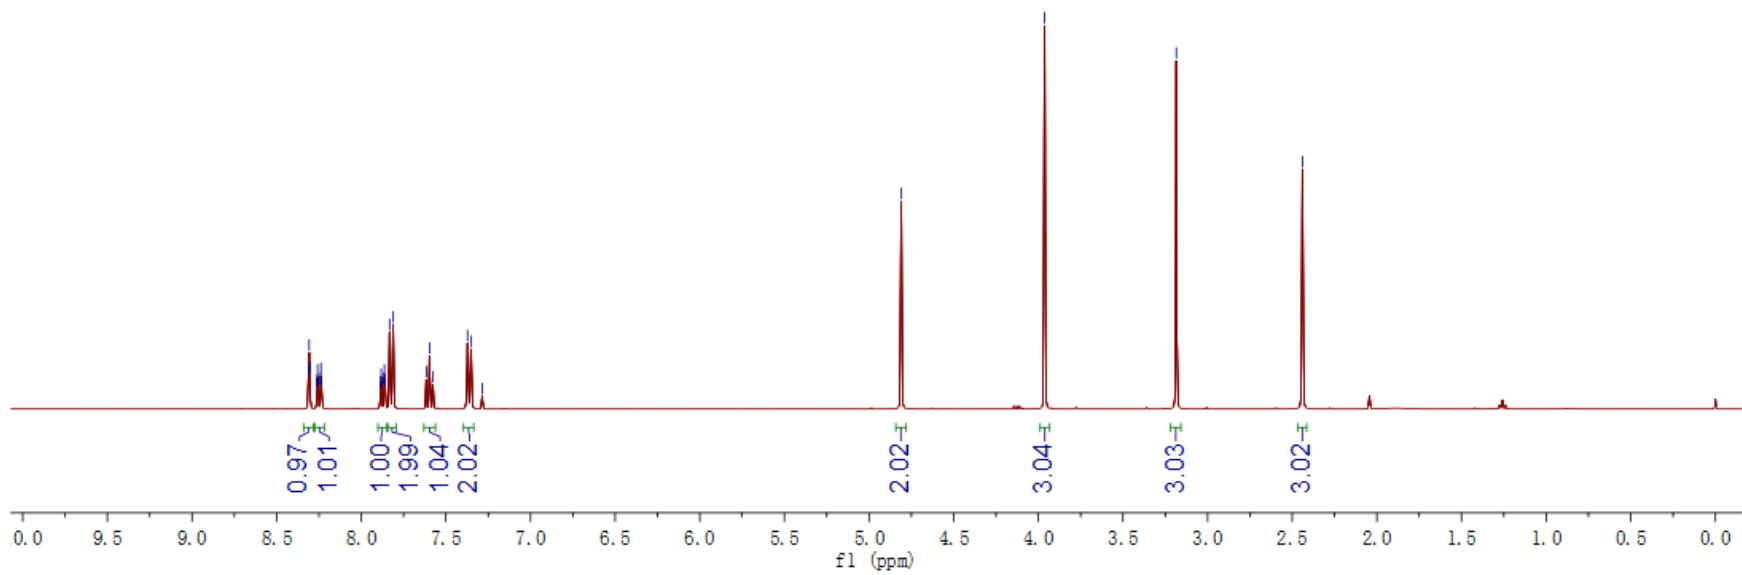

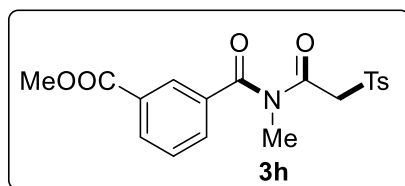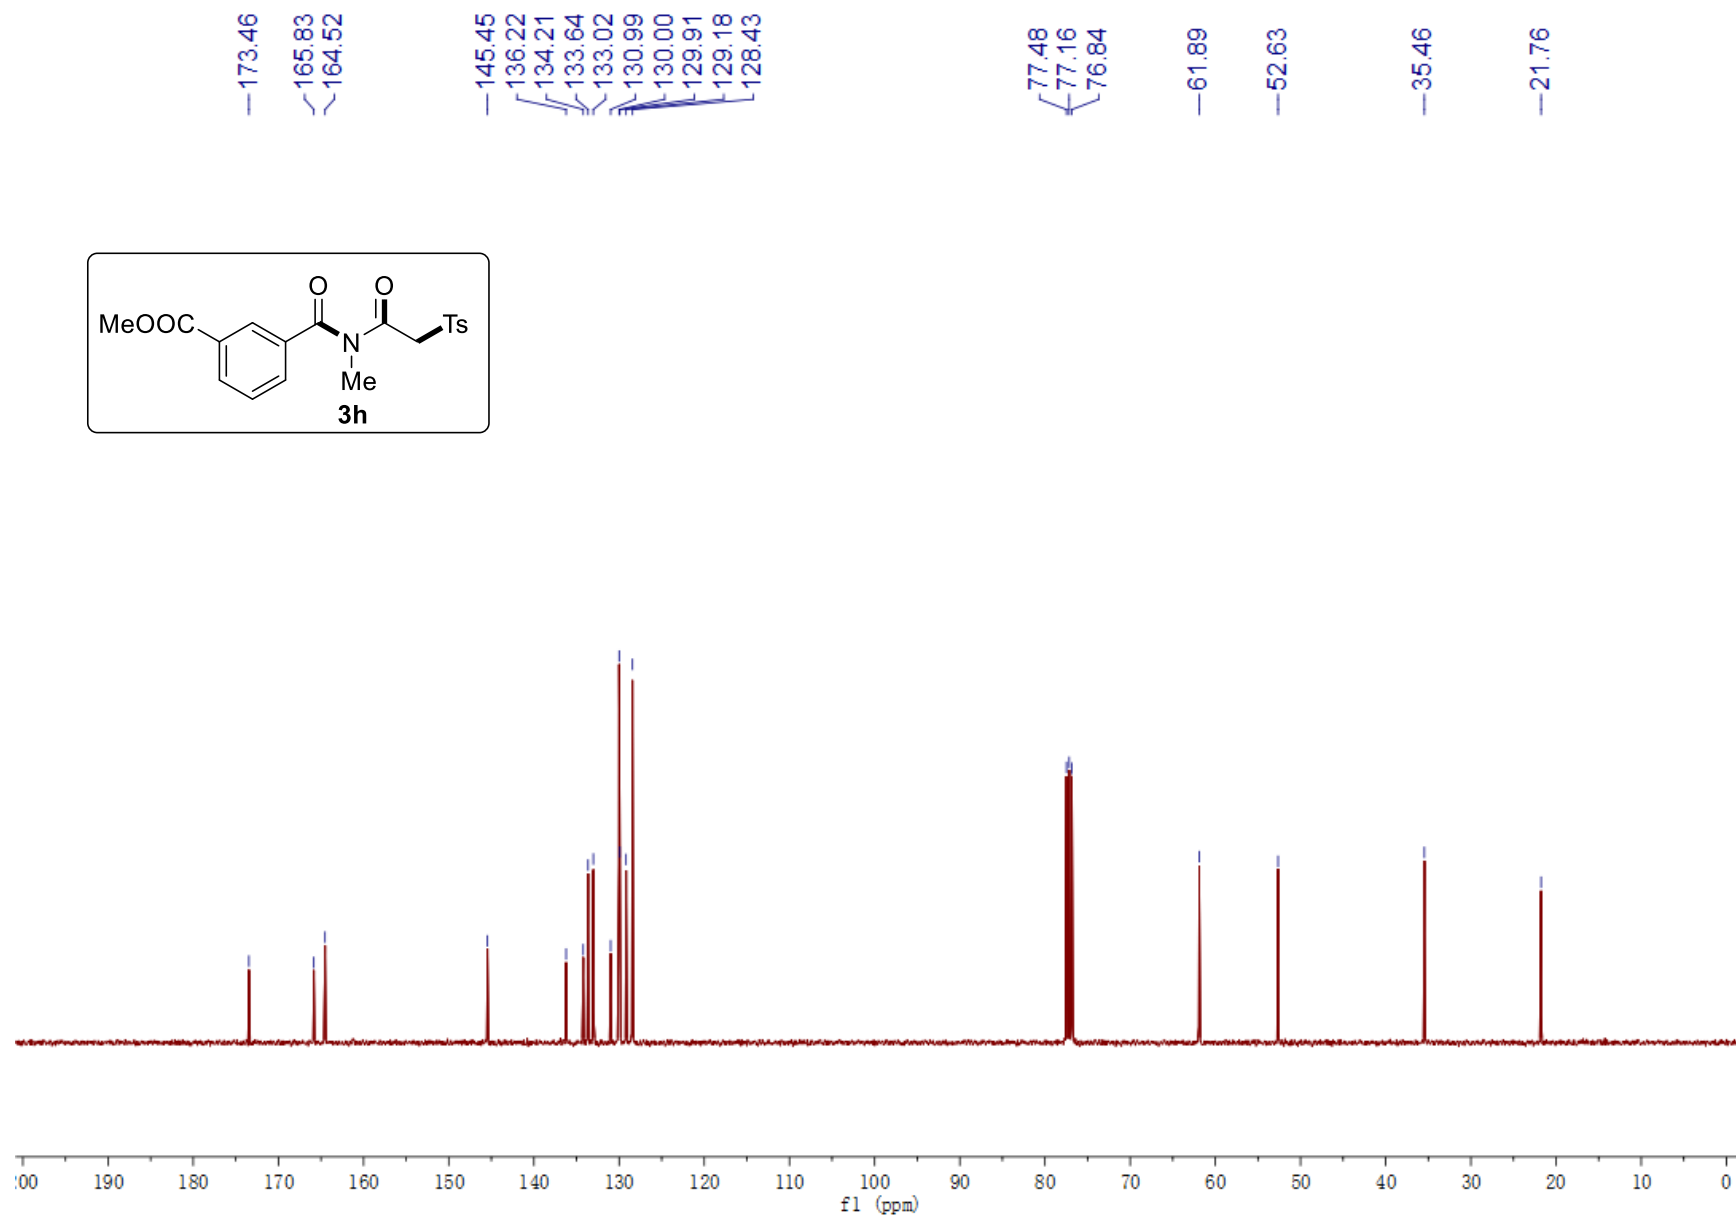



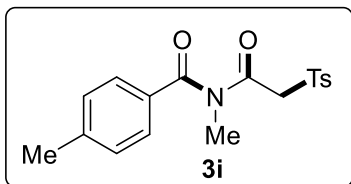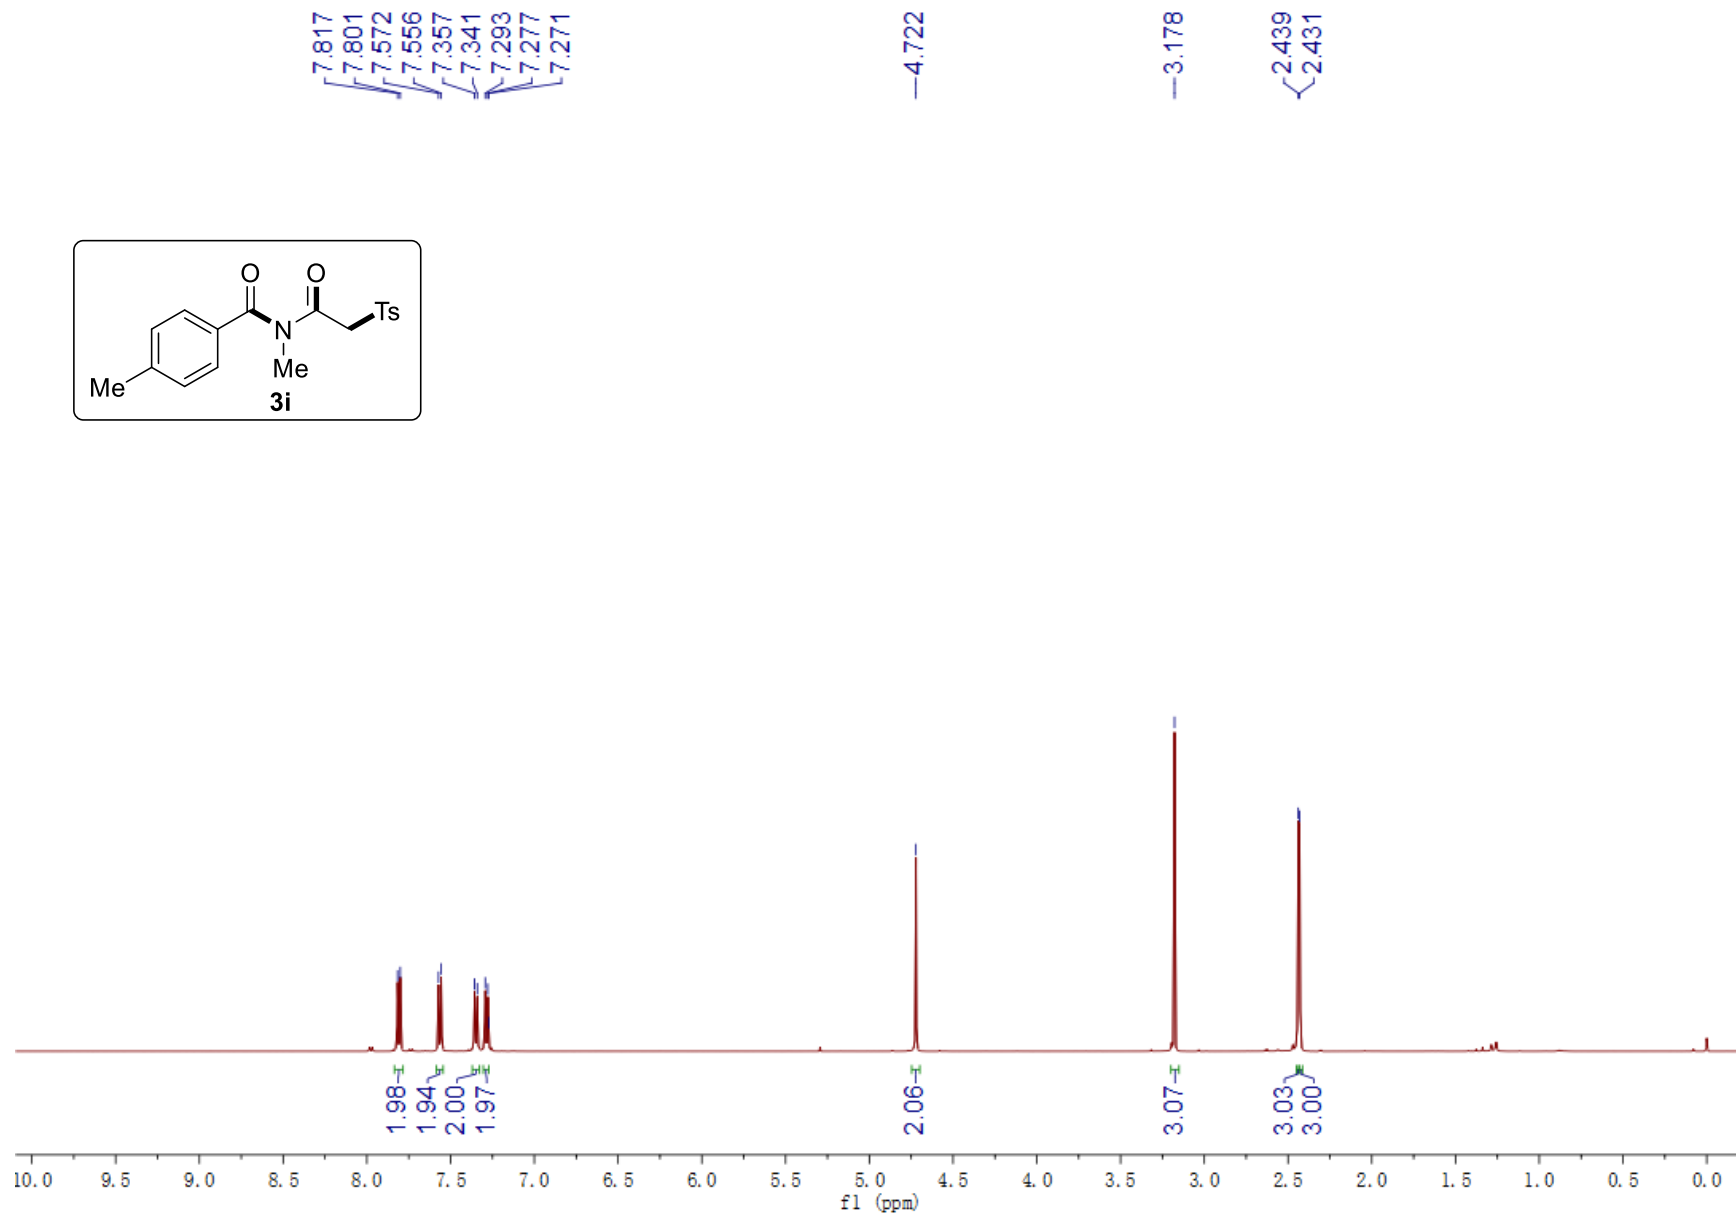

S73

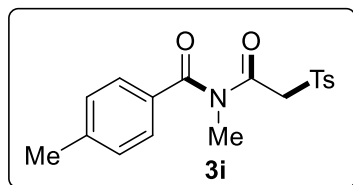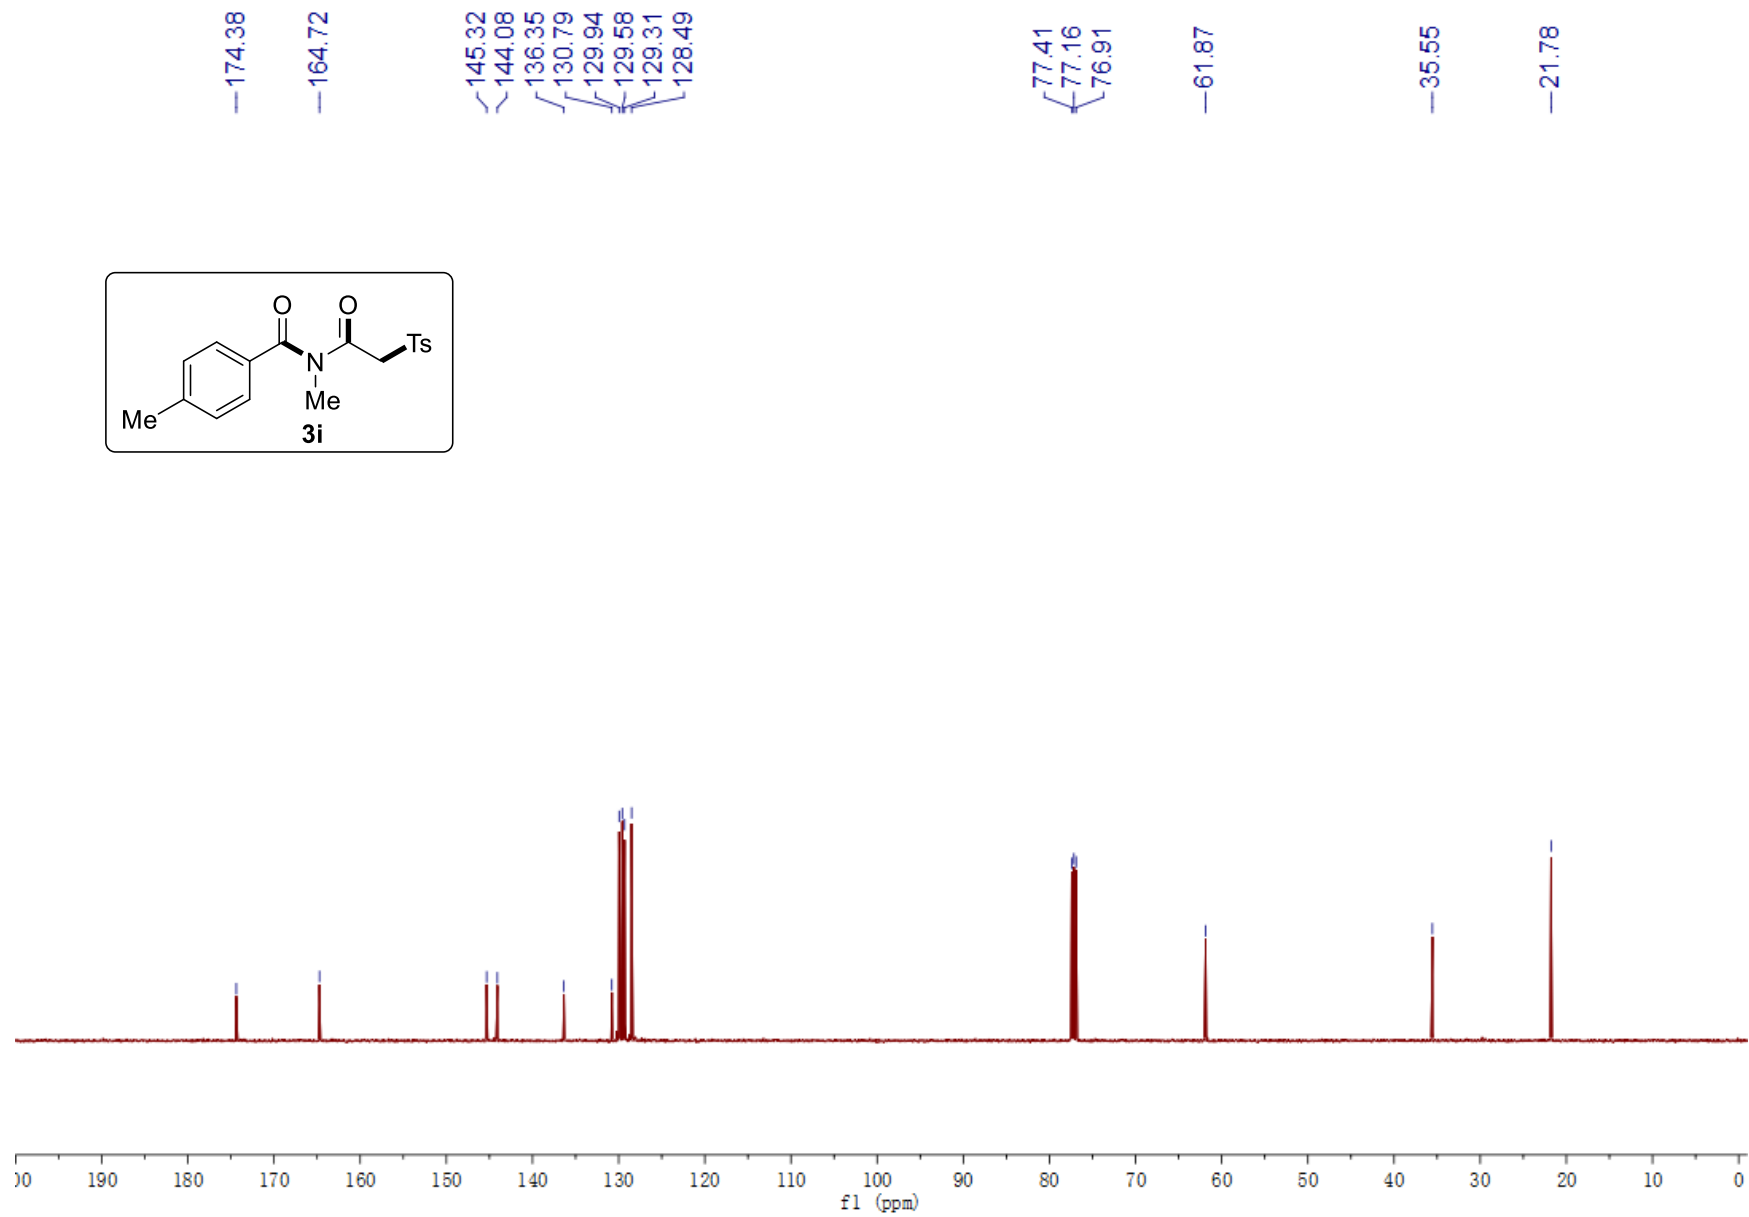

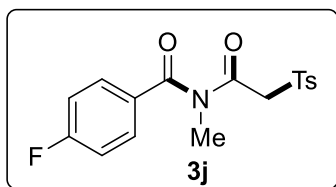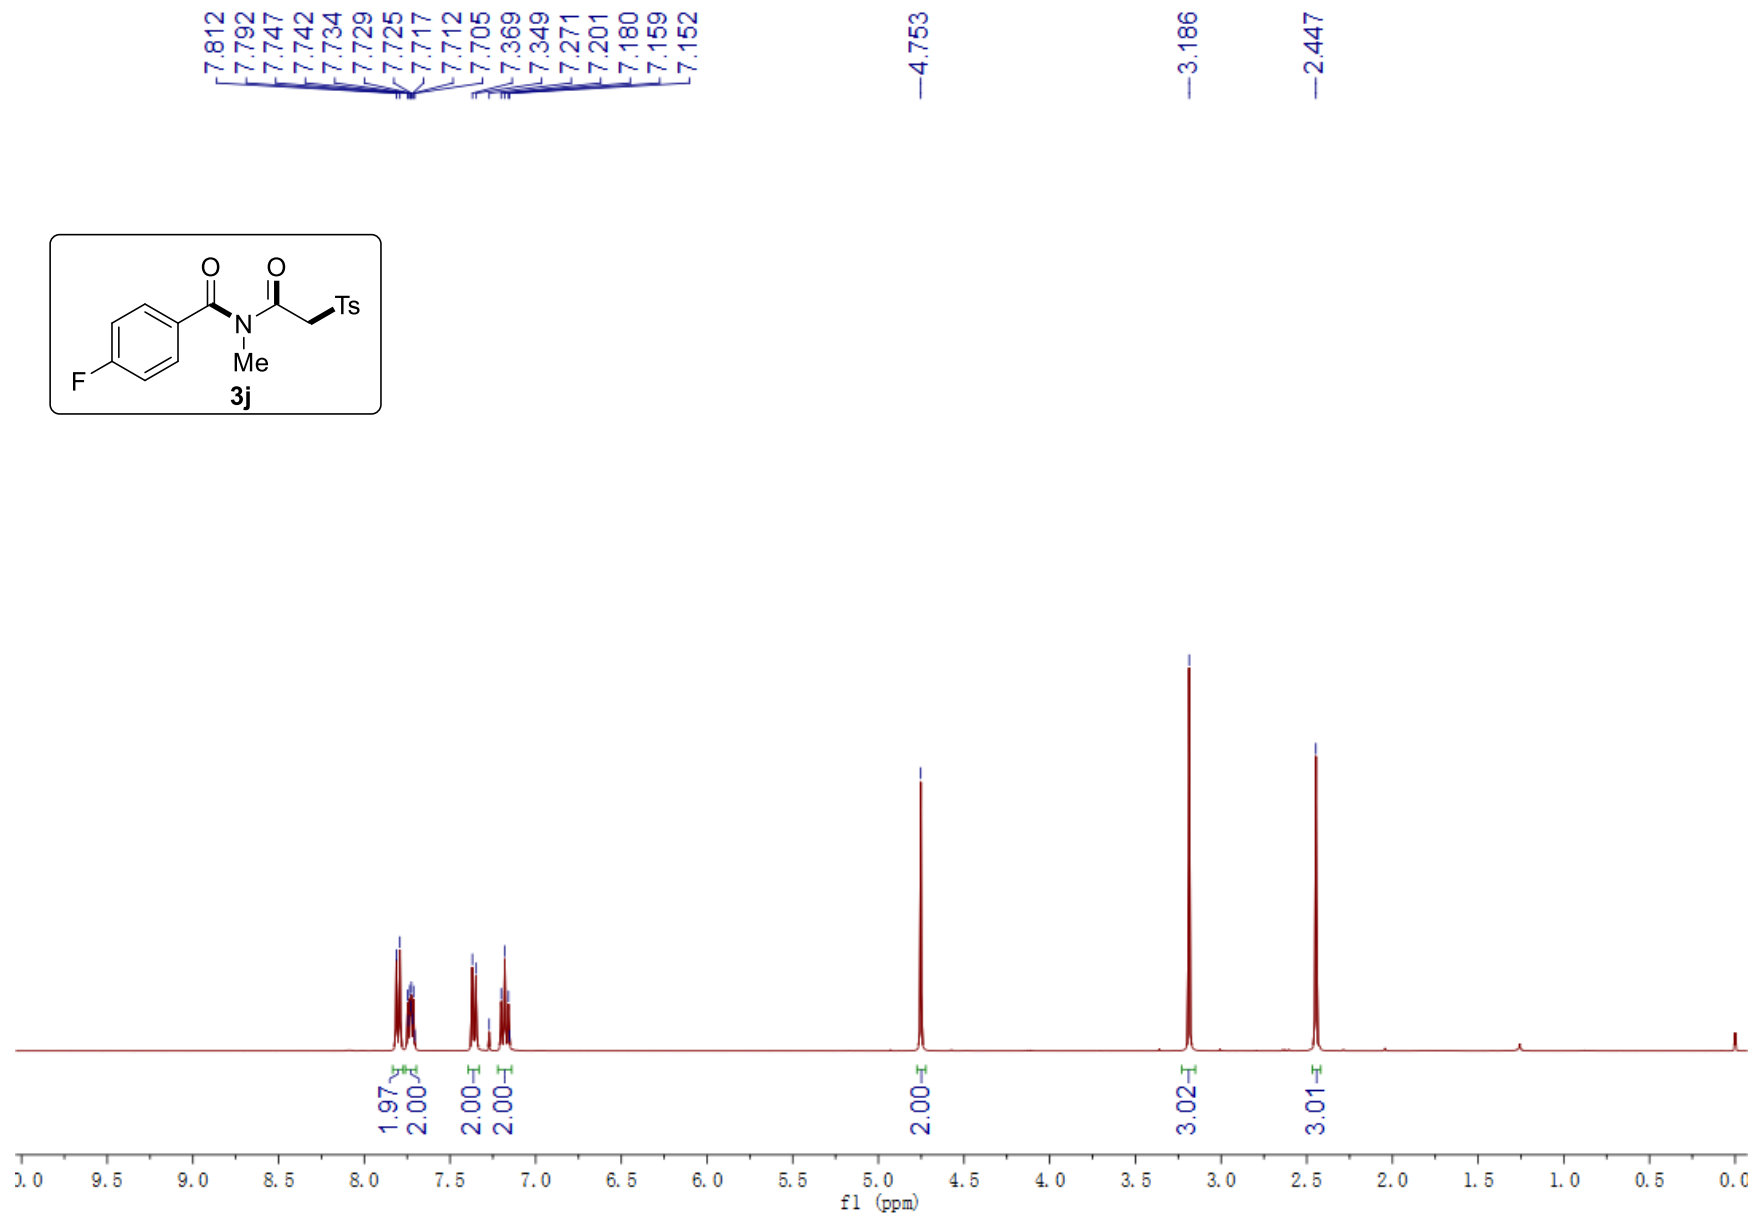

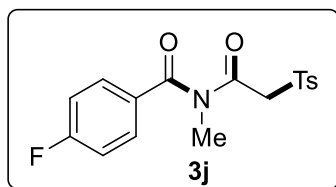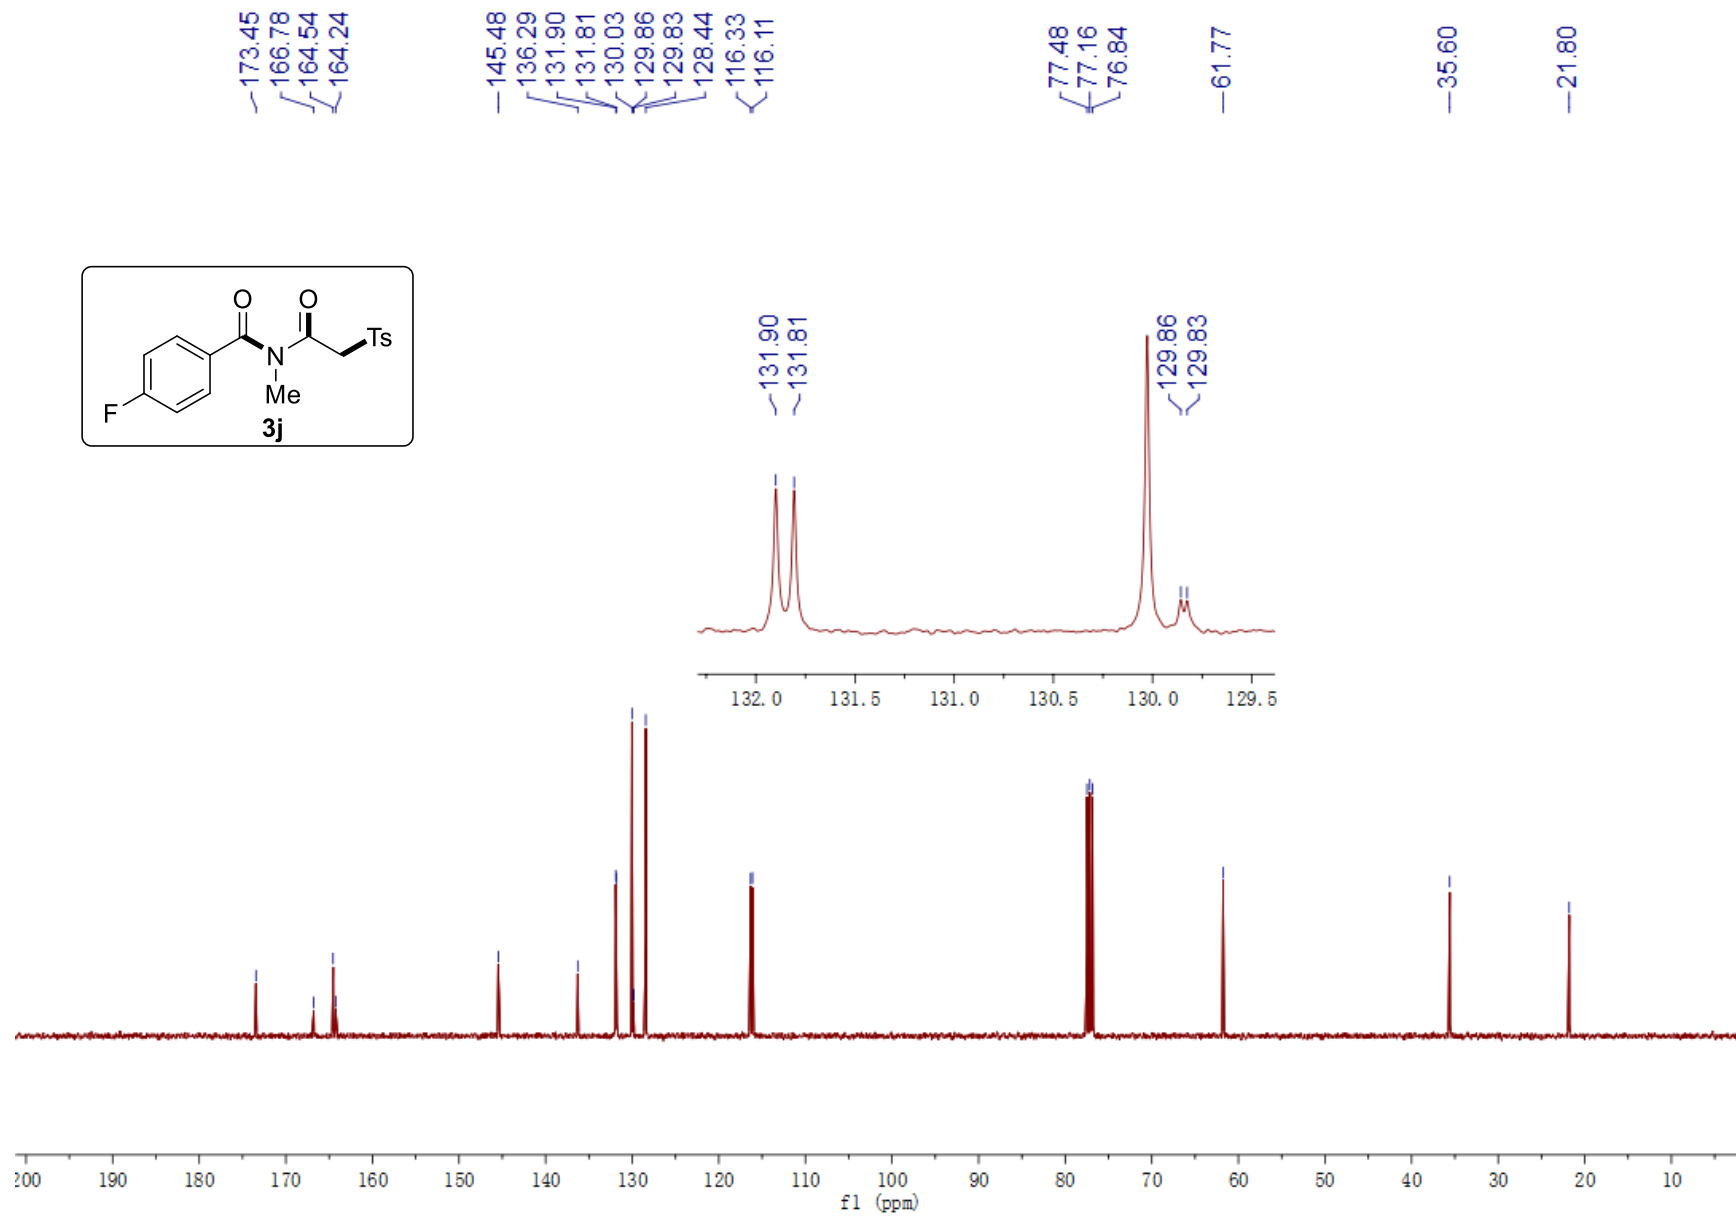

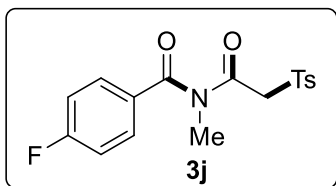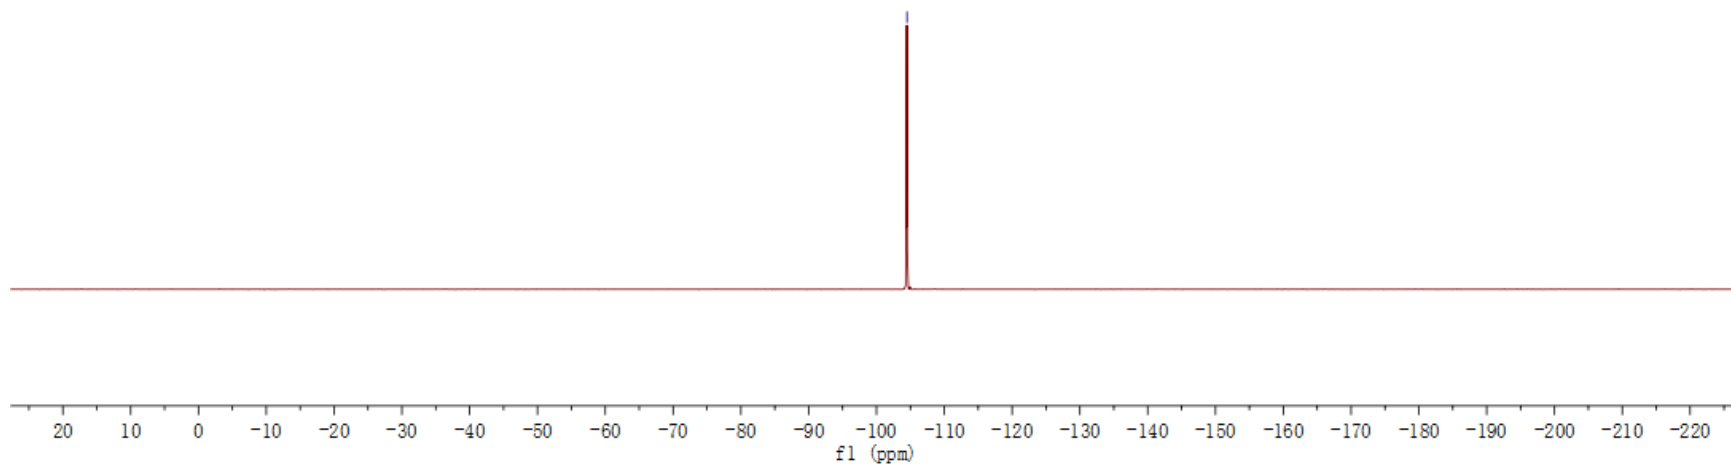

S77

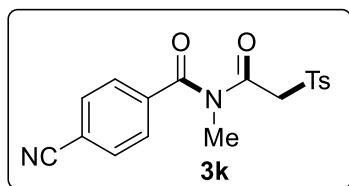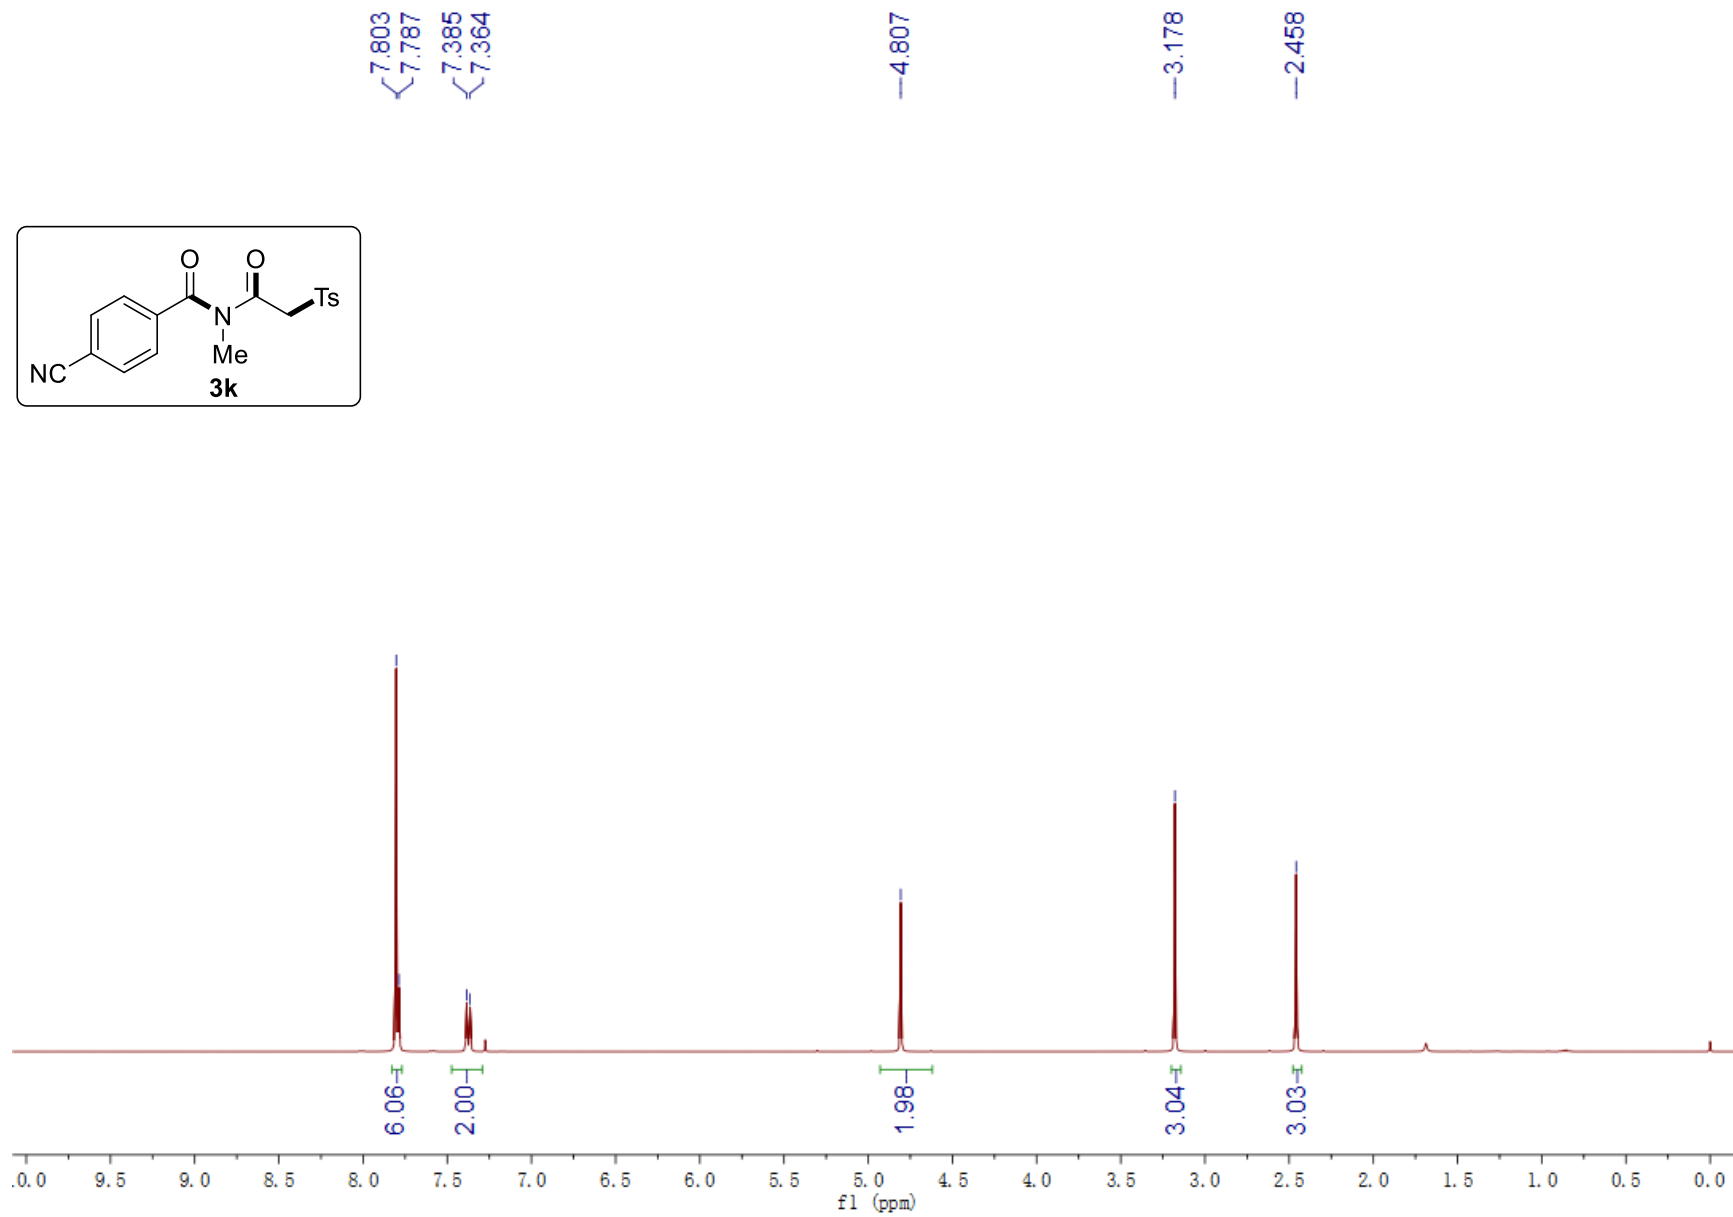

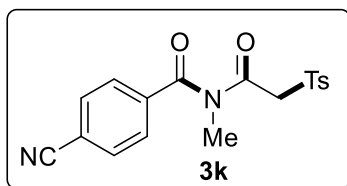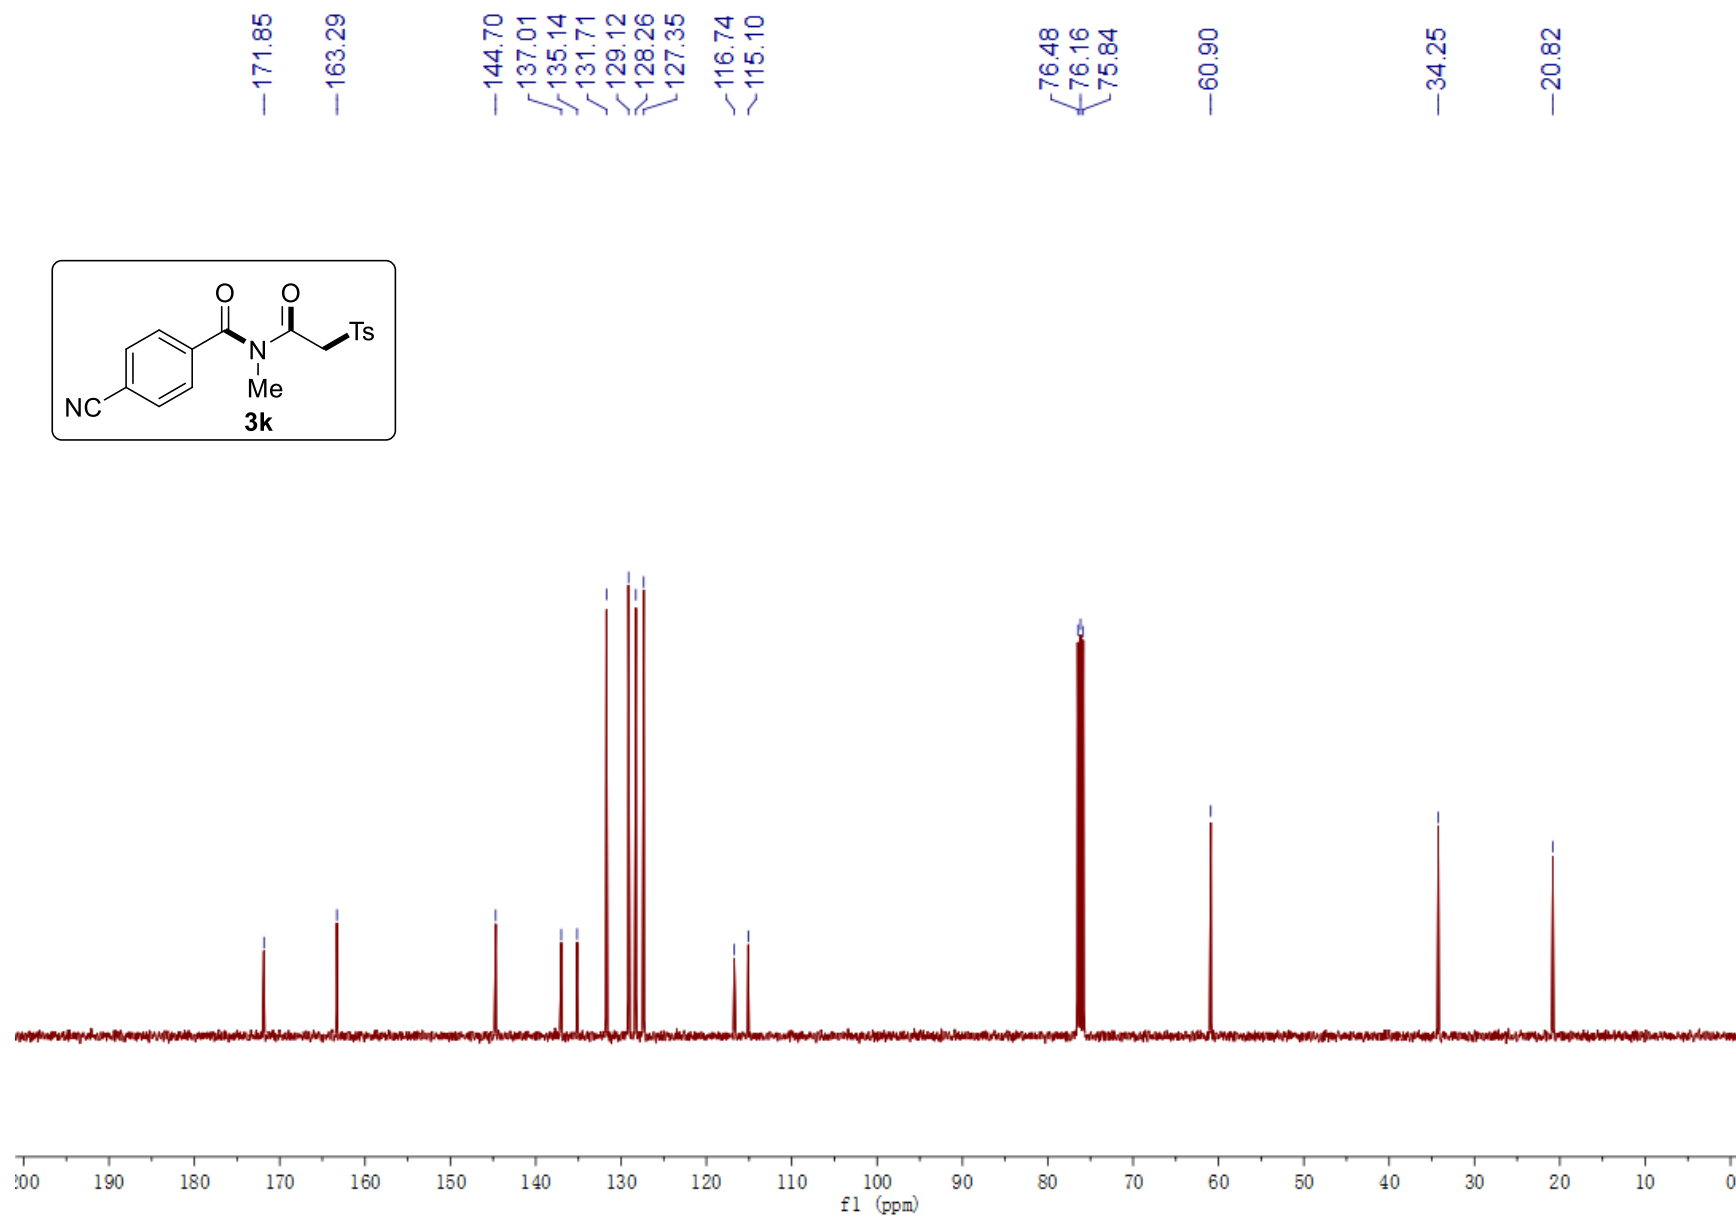

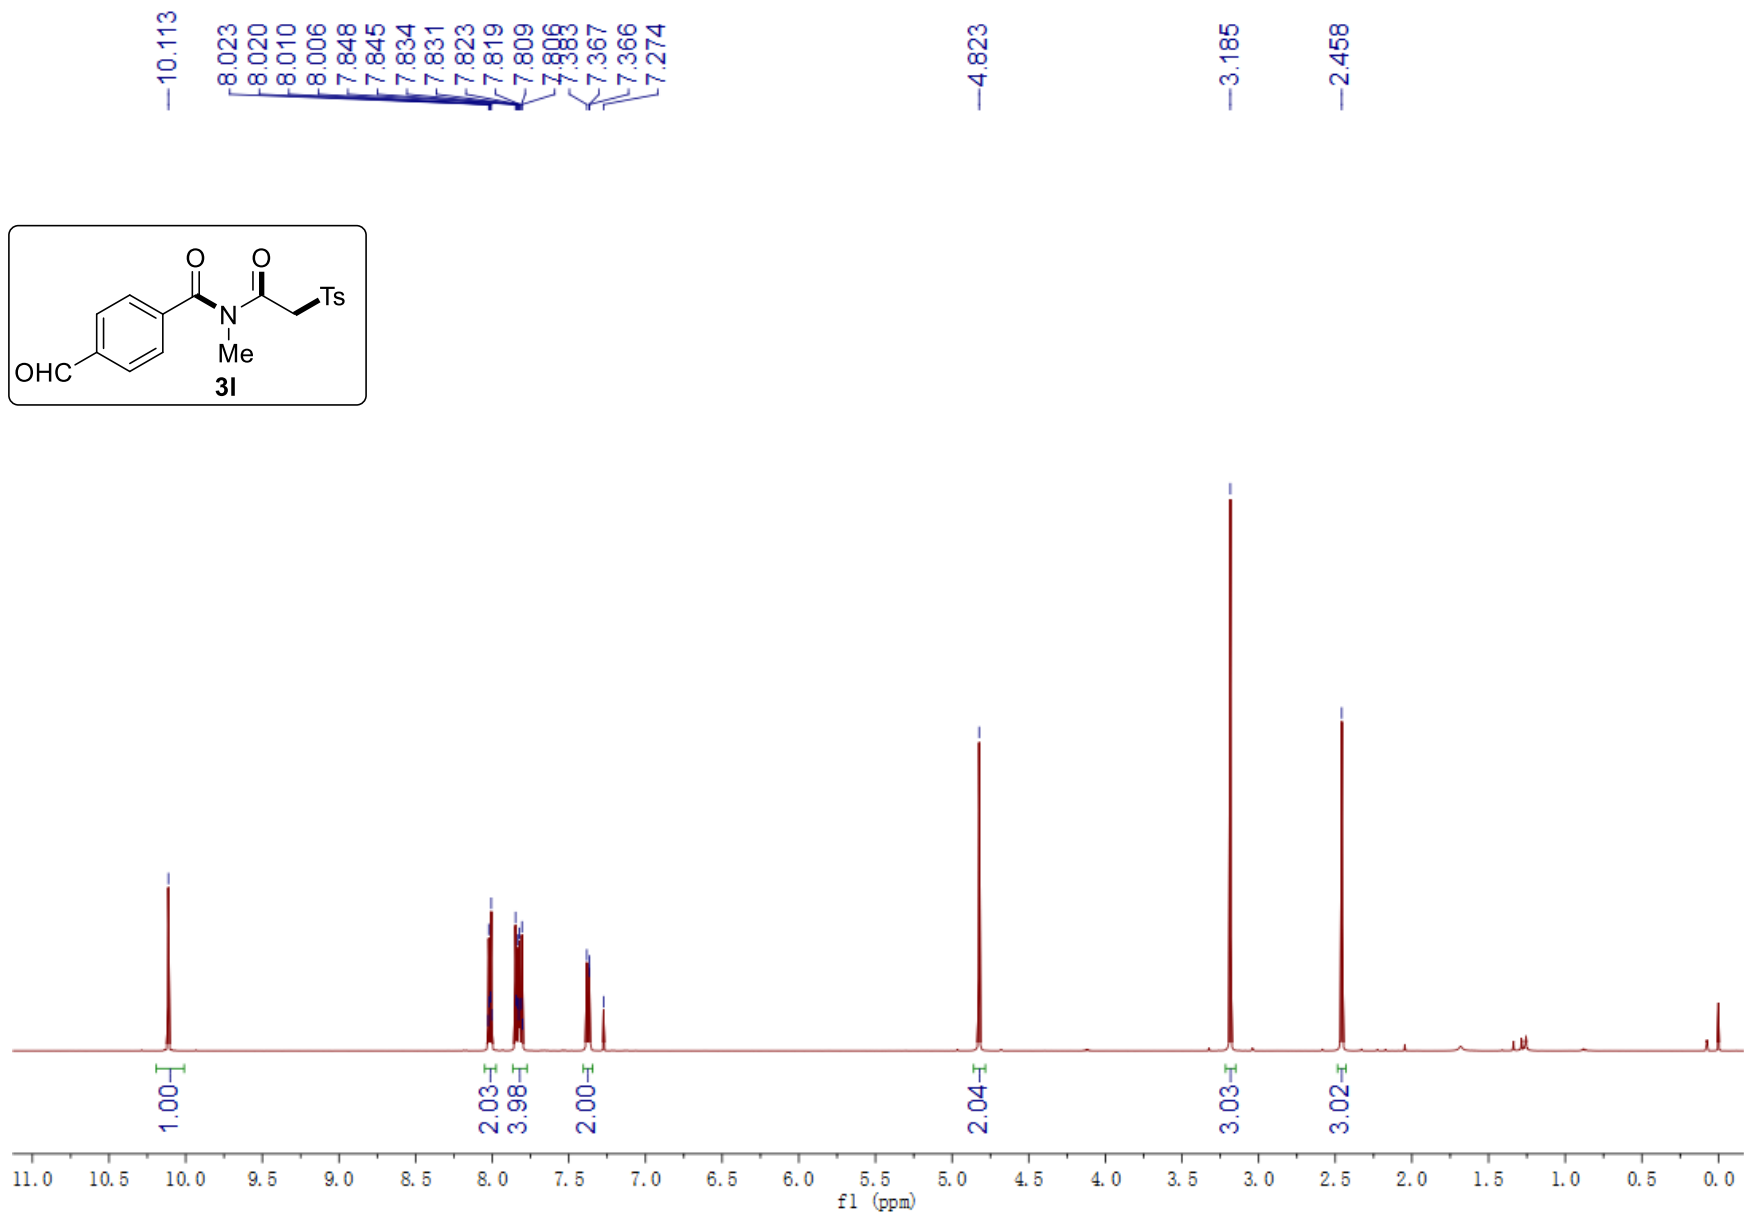



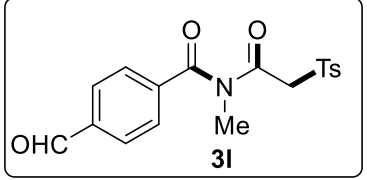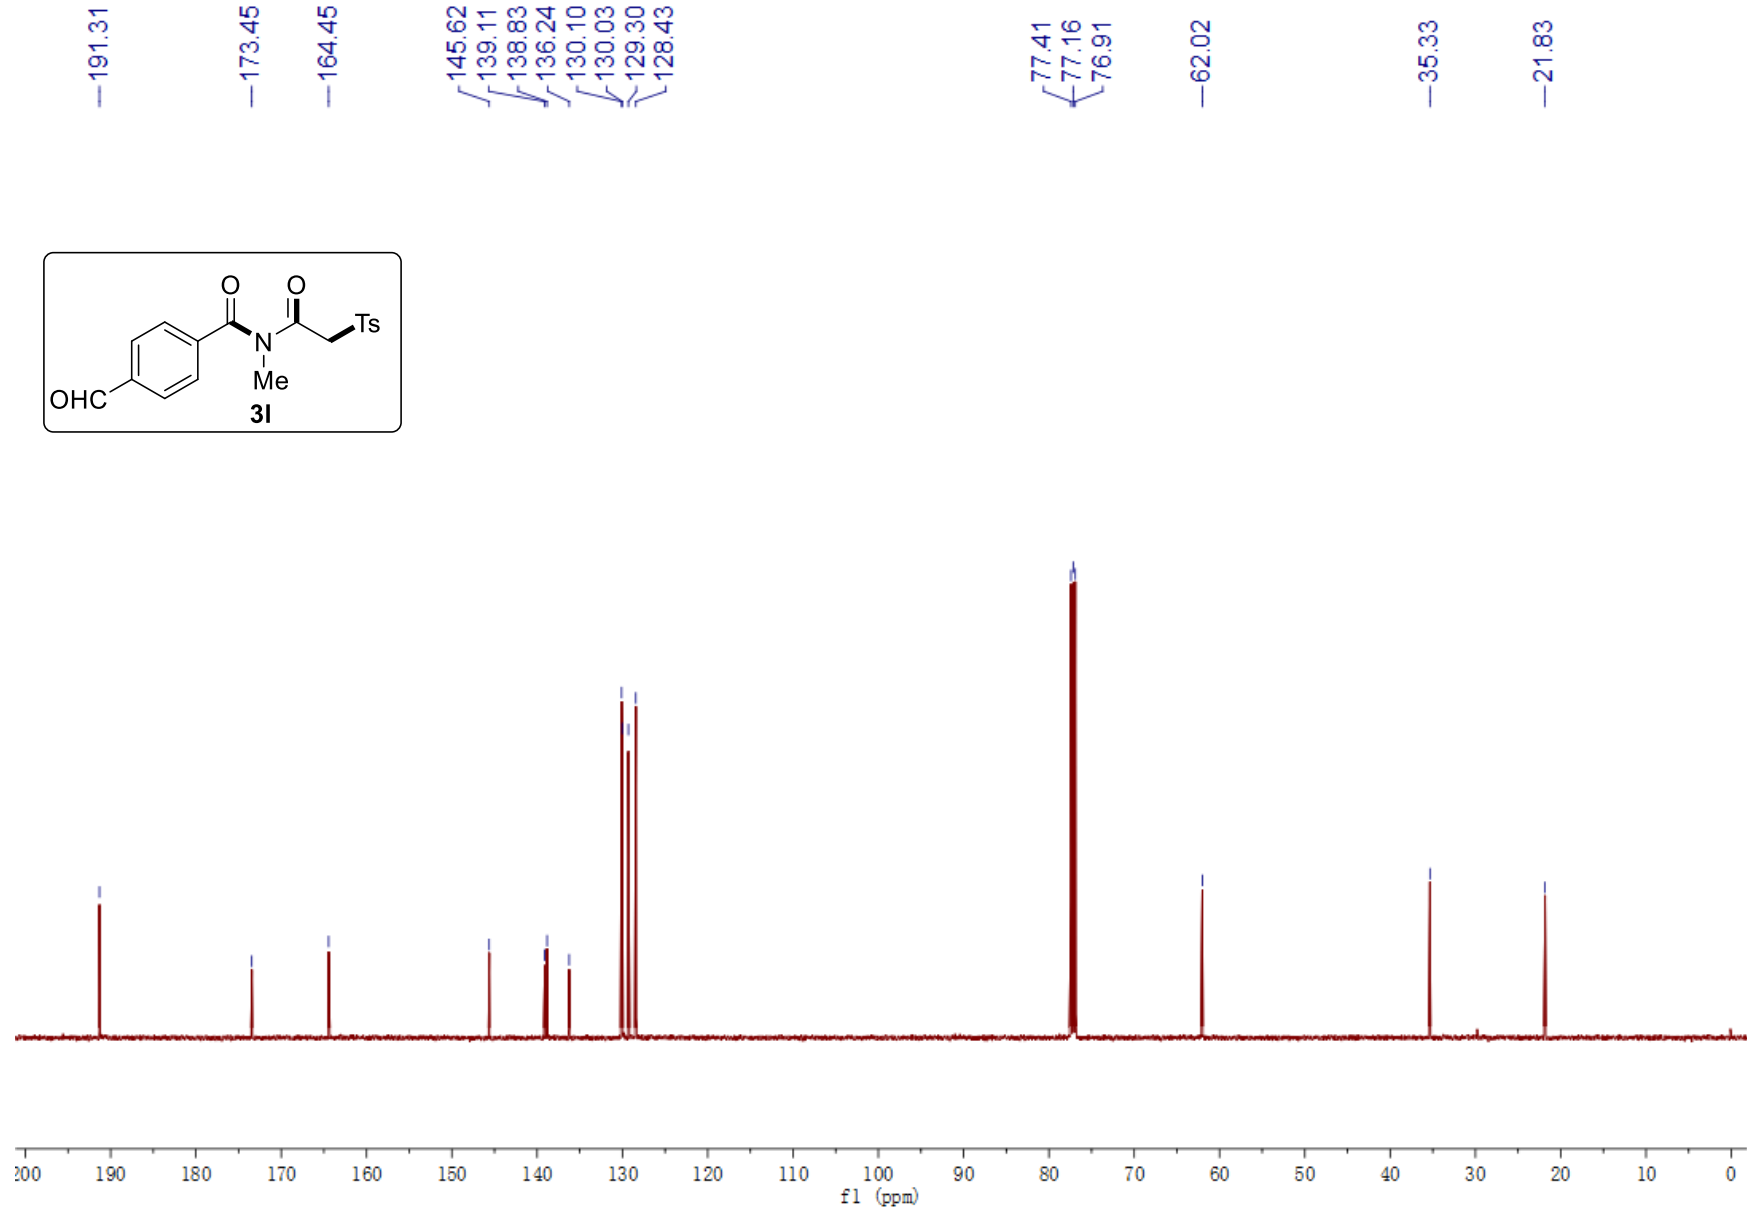

S81

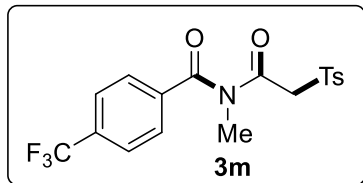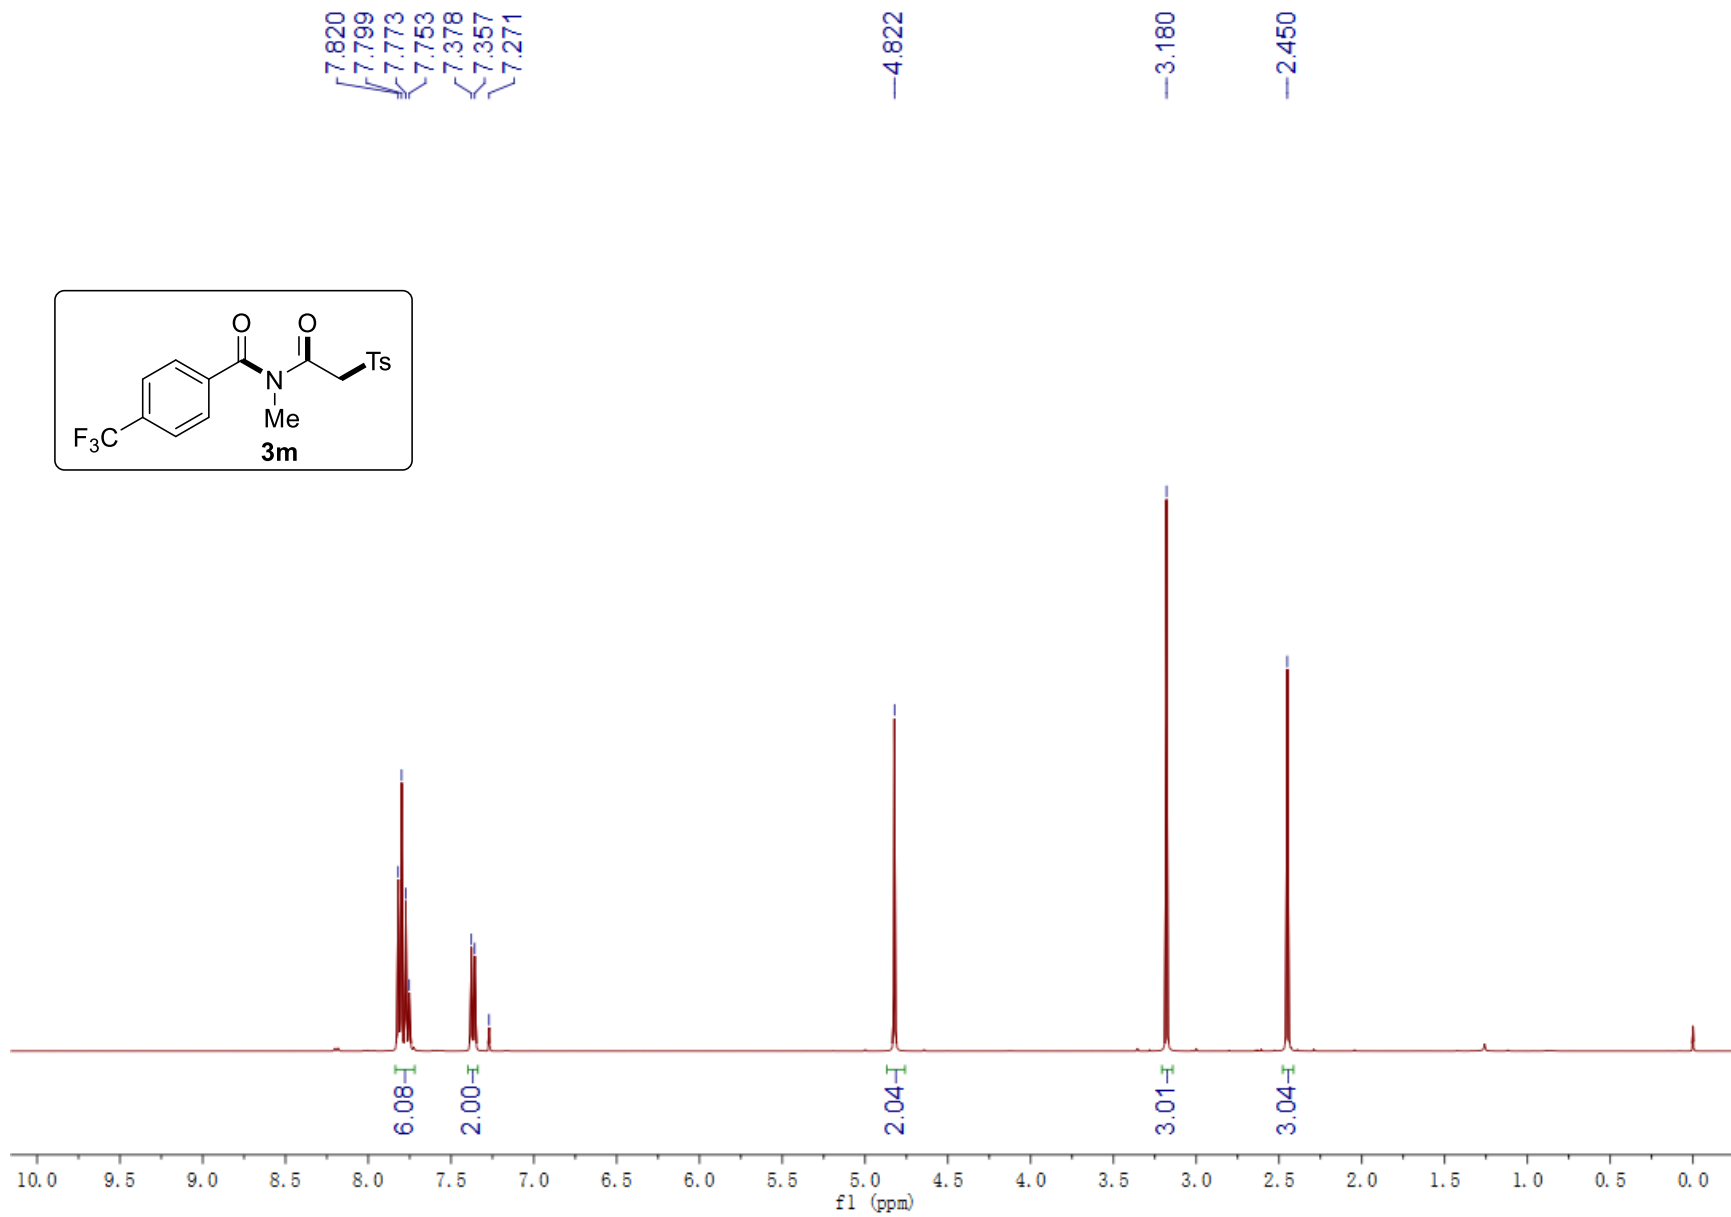

S82

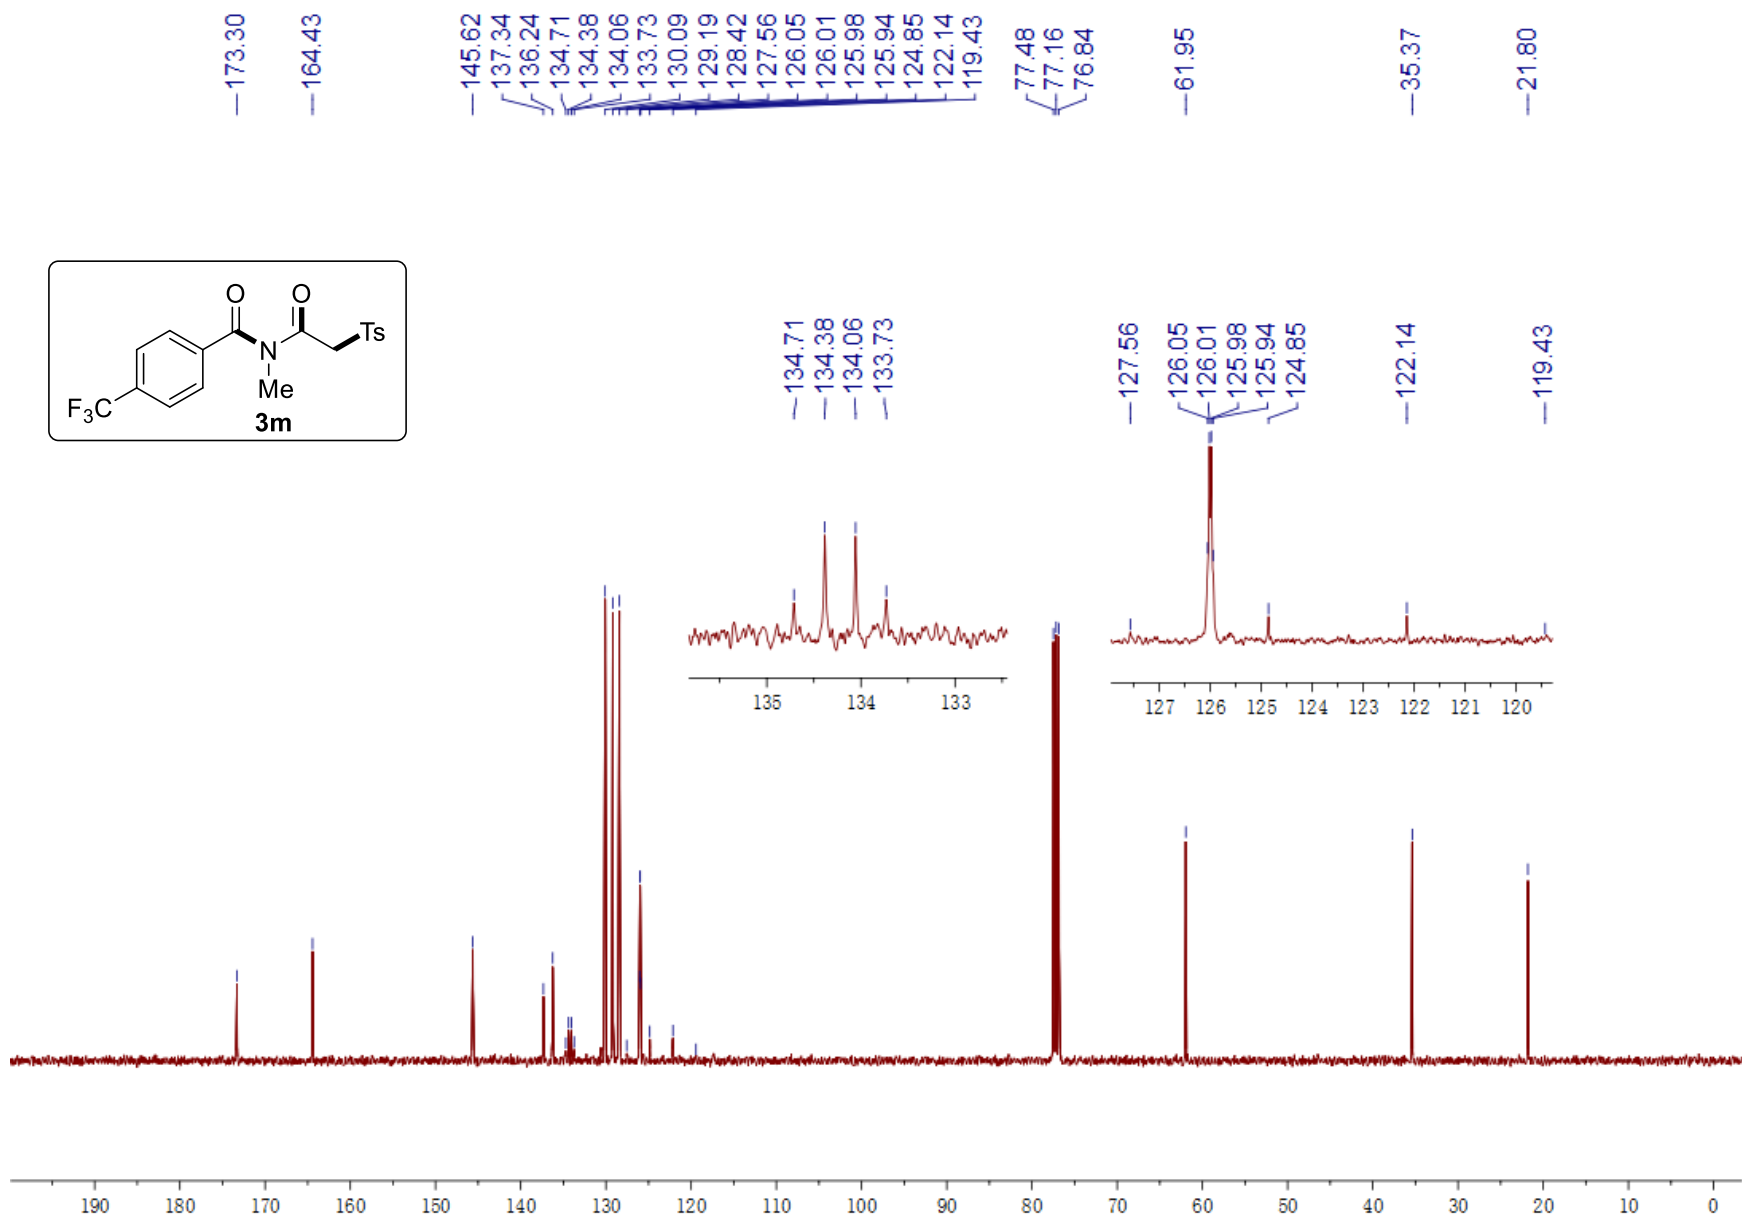

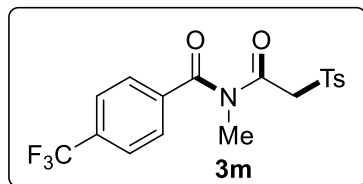

--63.139

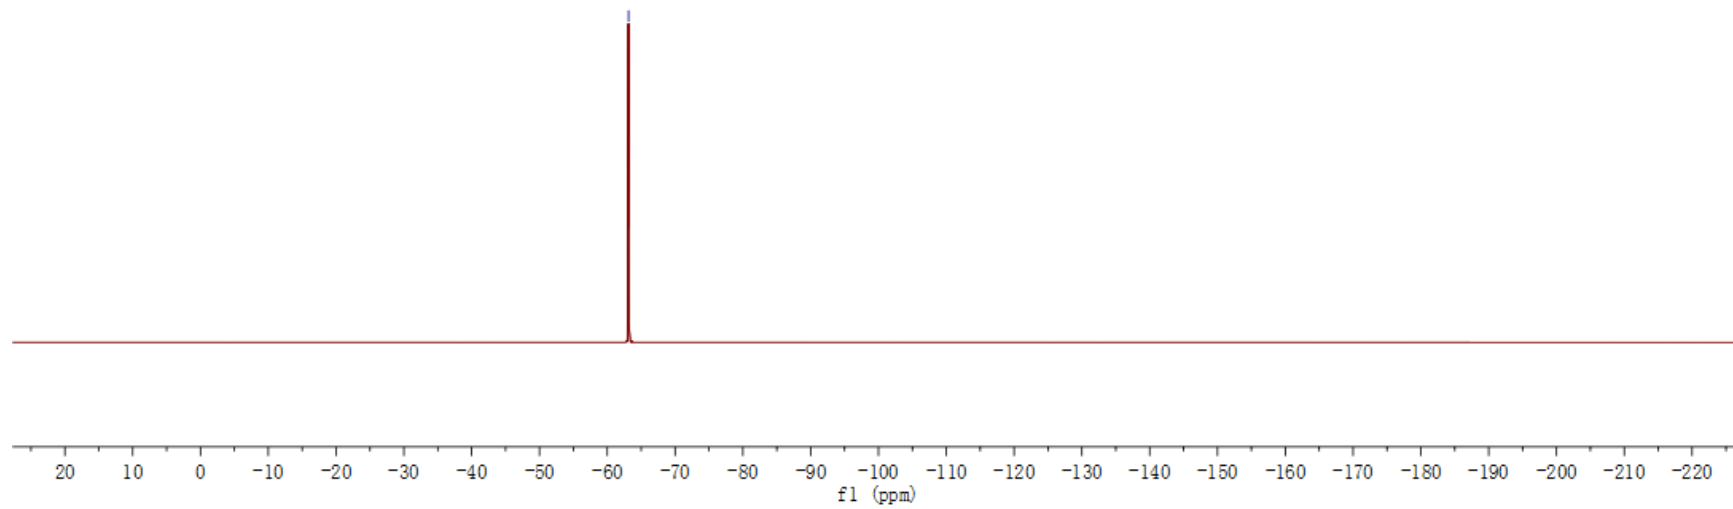

**S84**

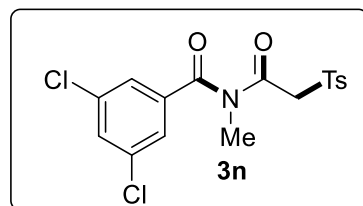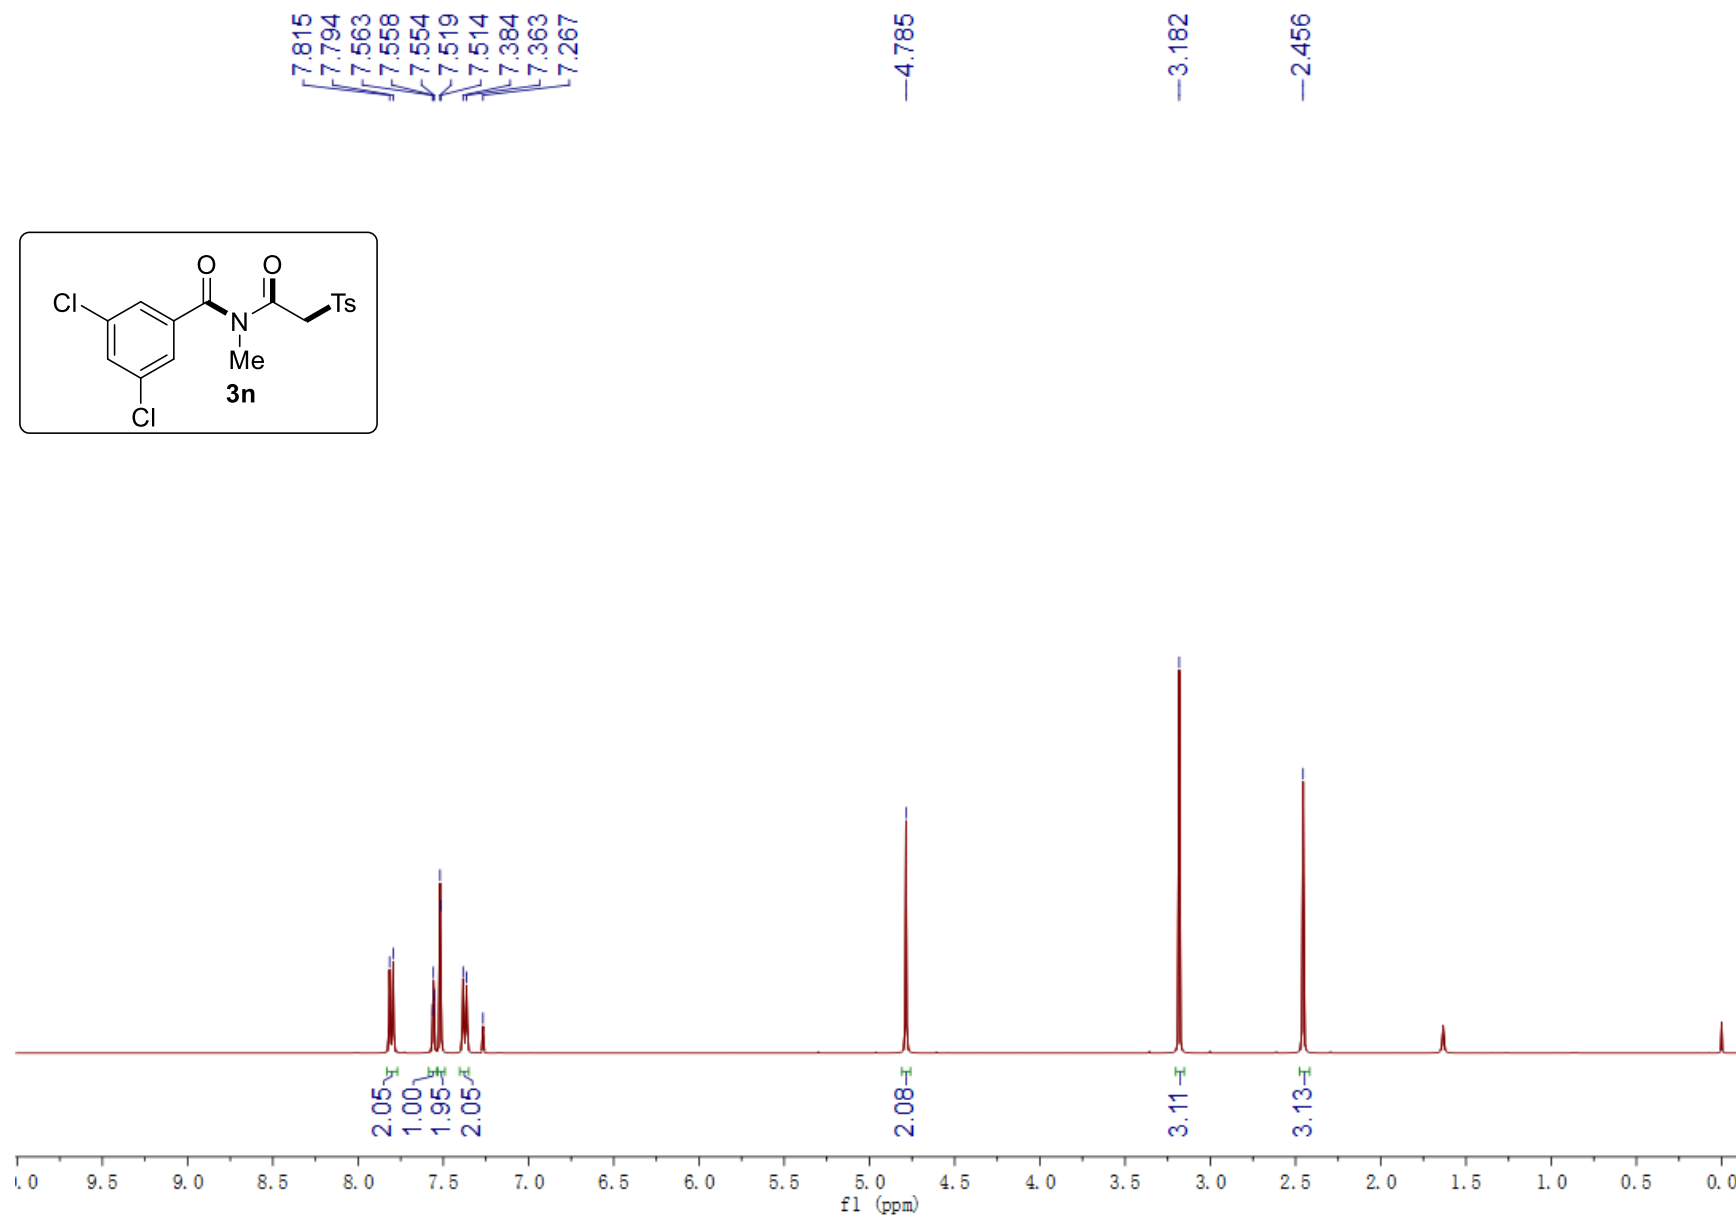

S85

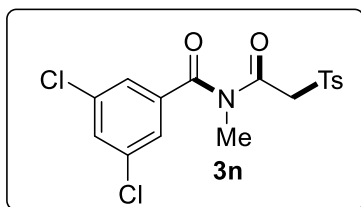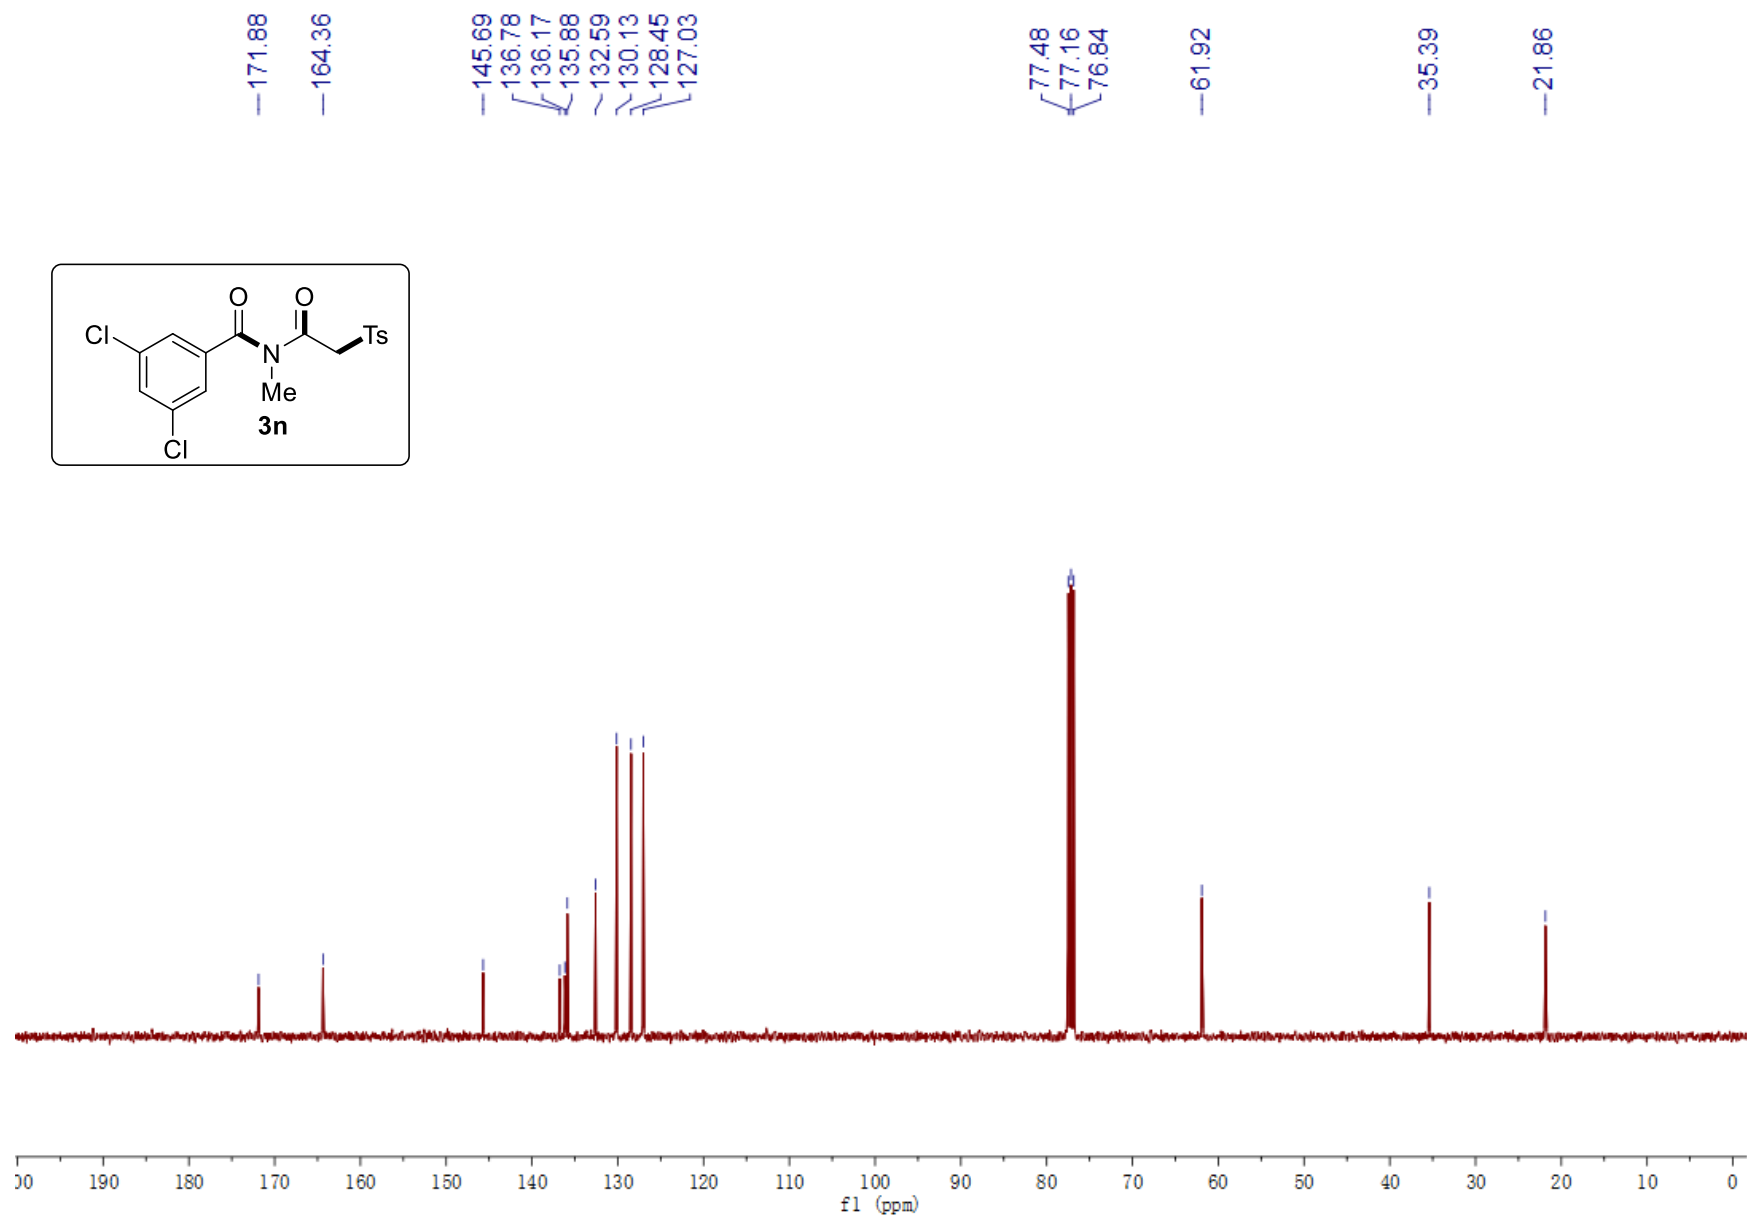

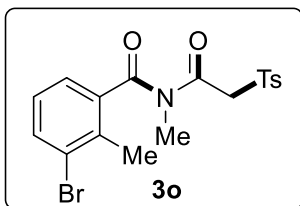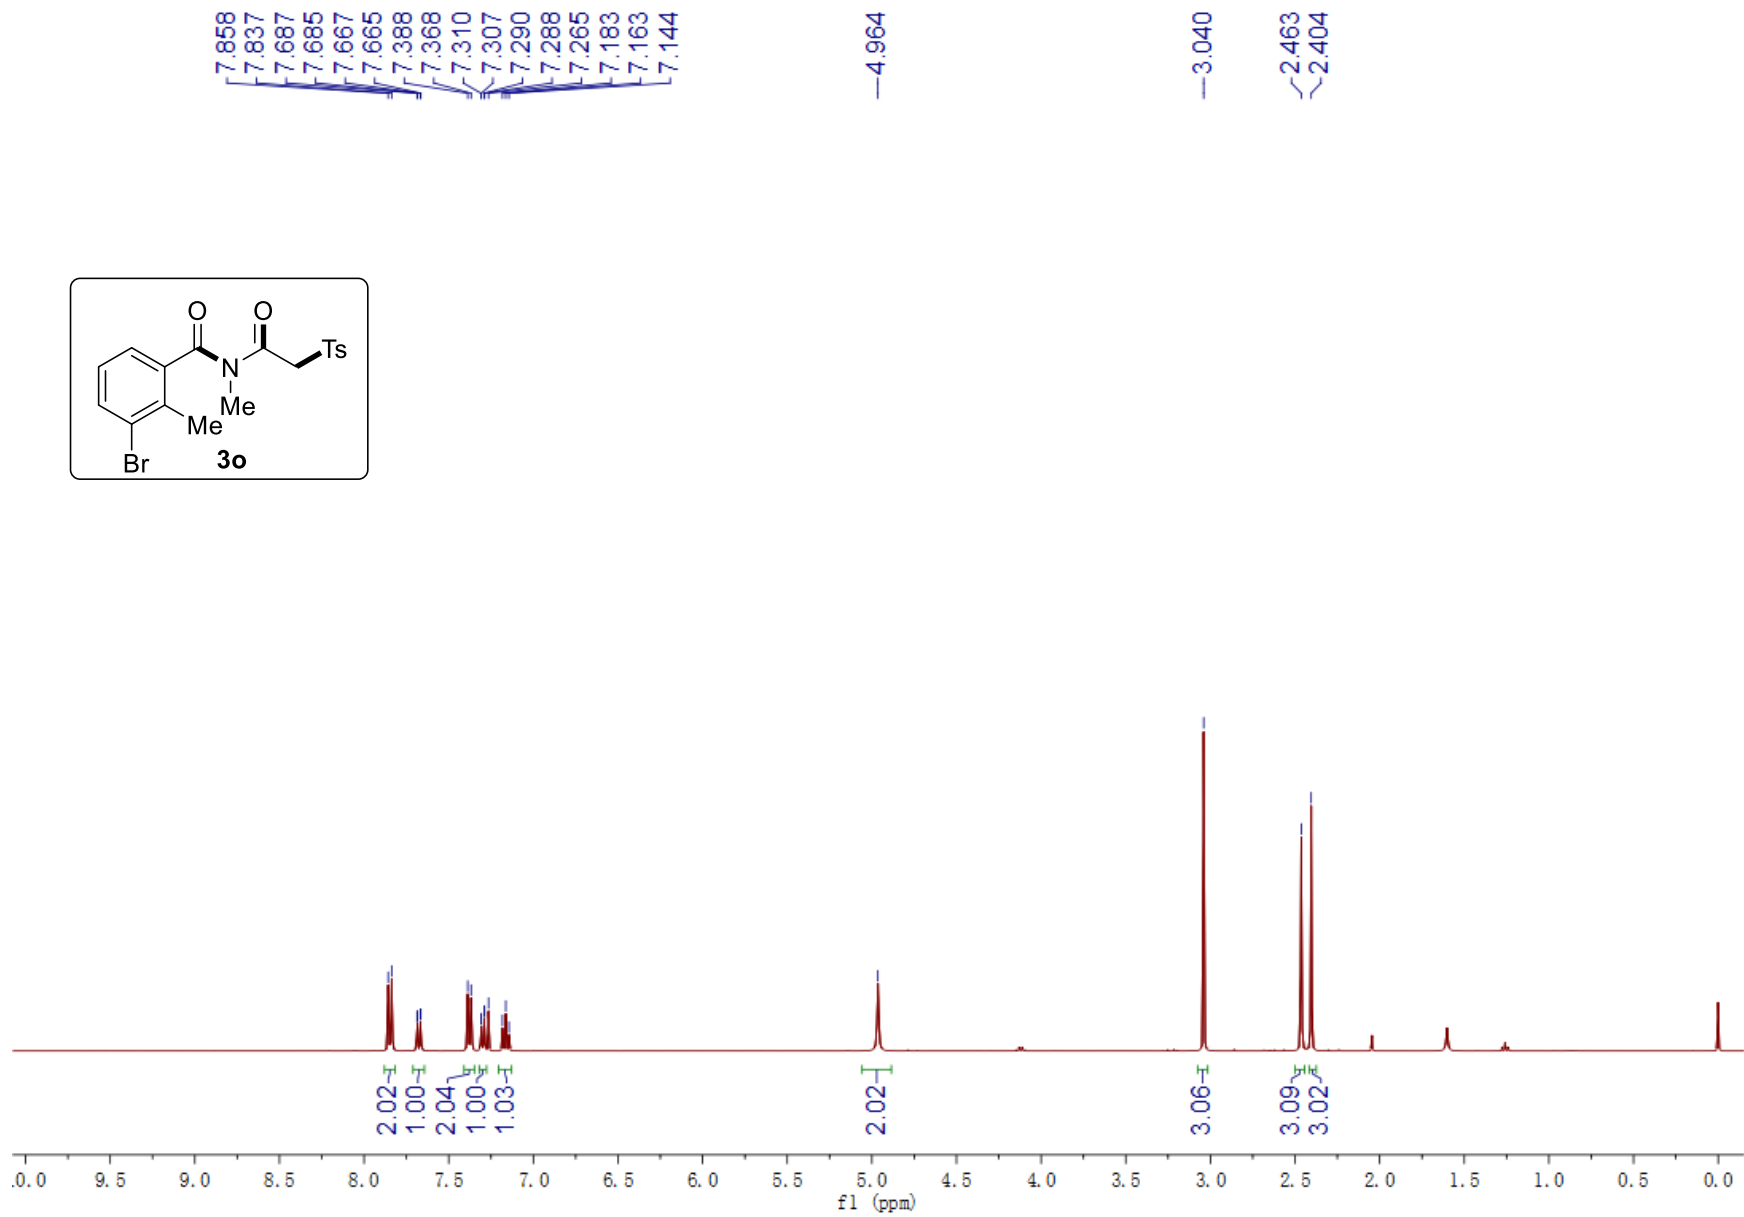

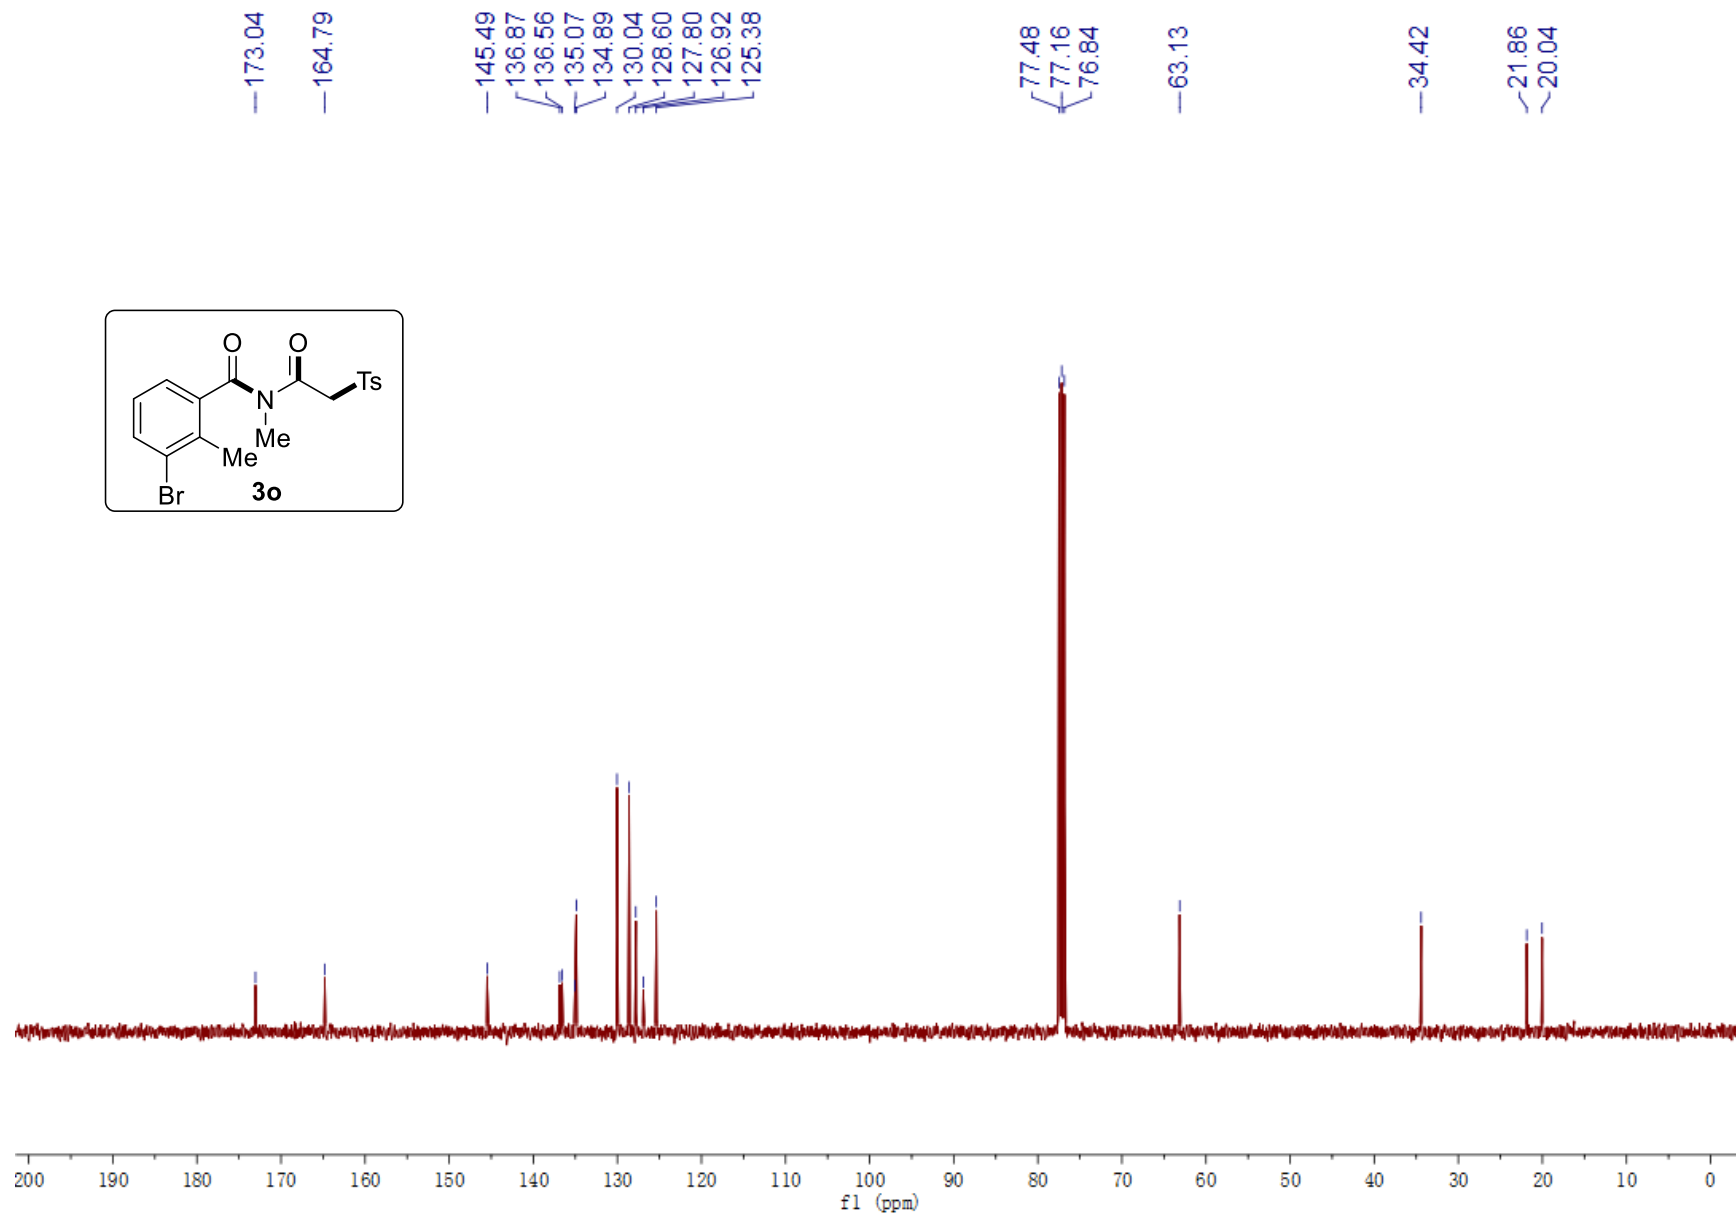





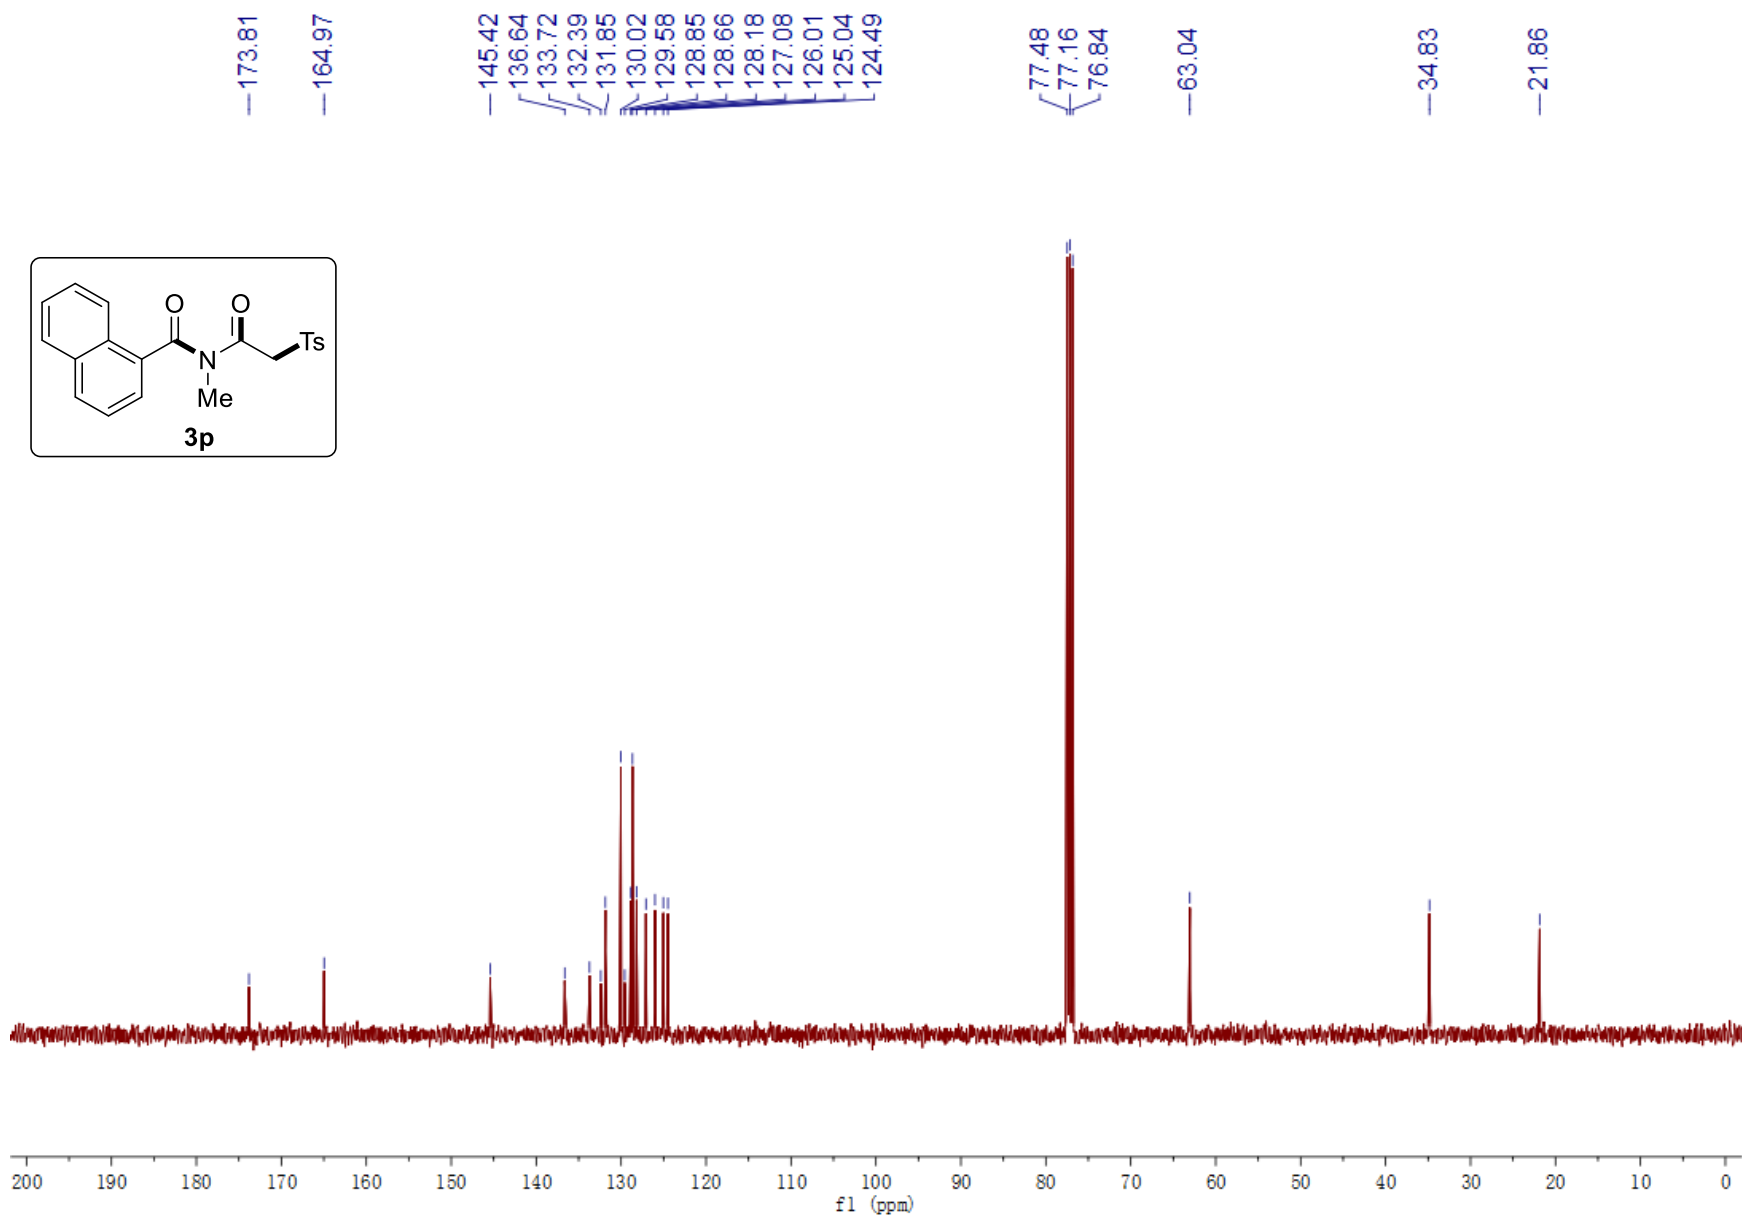



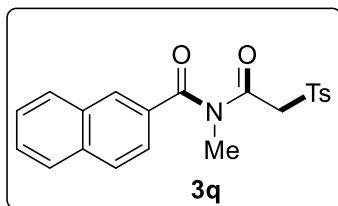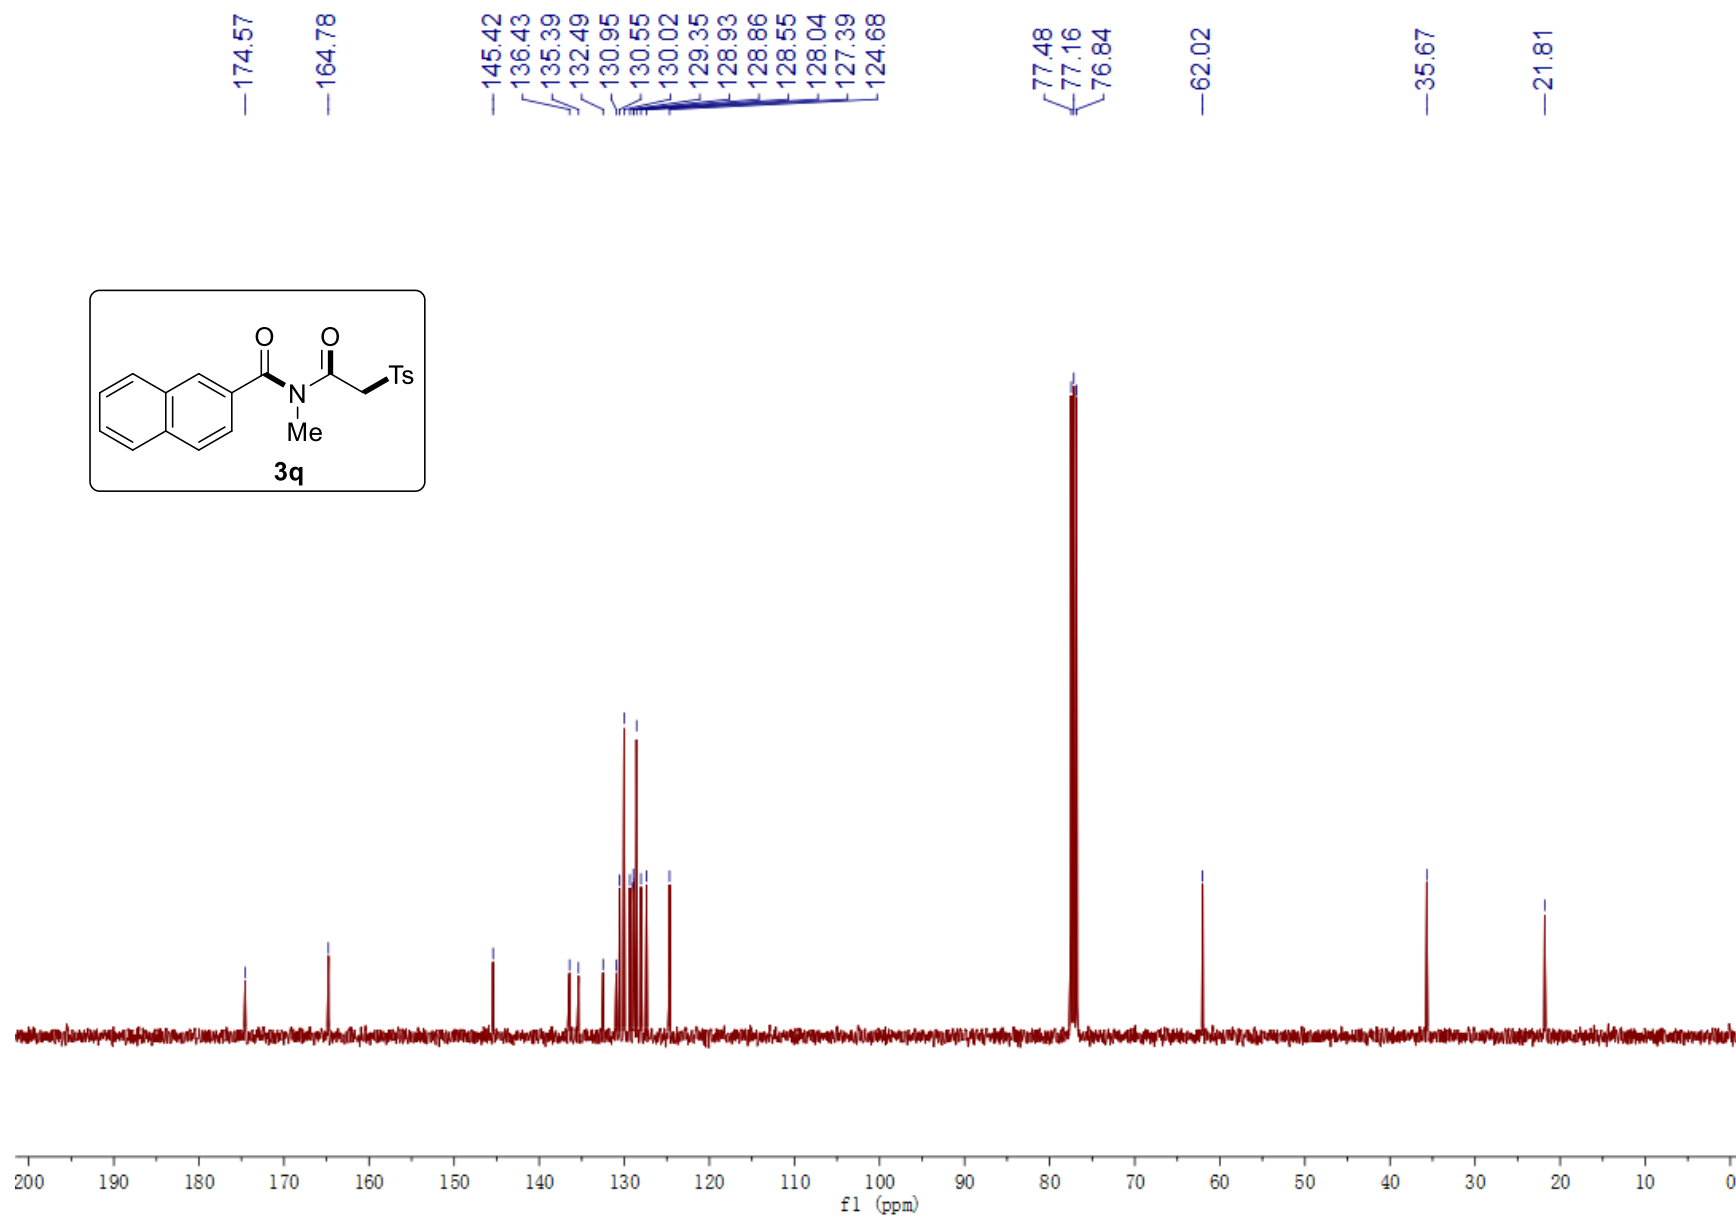

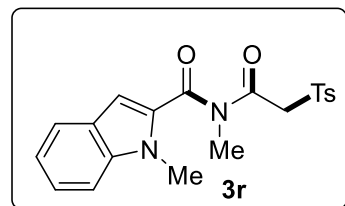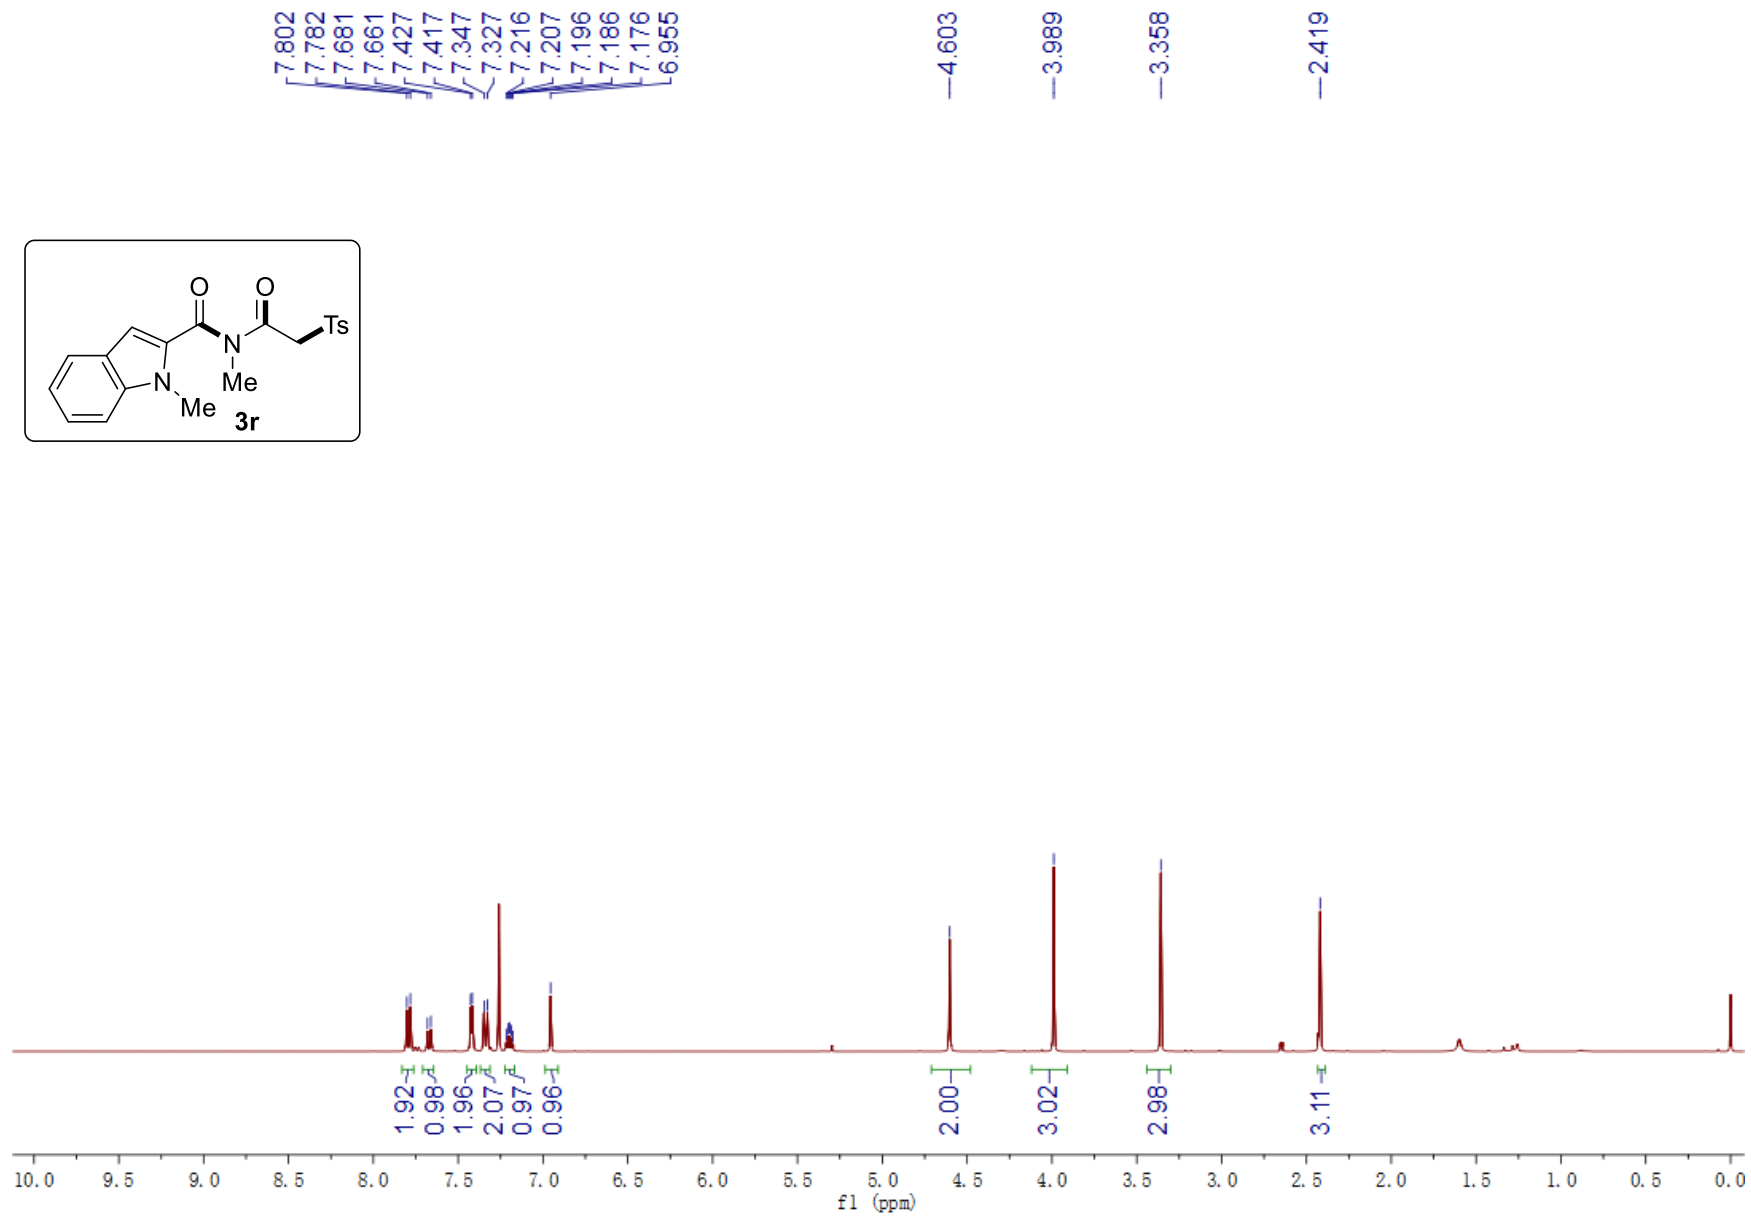

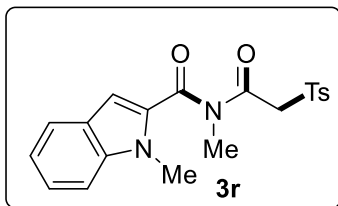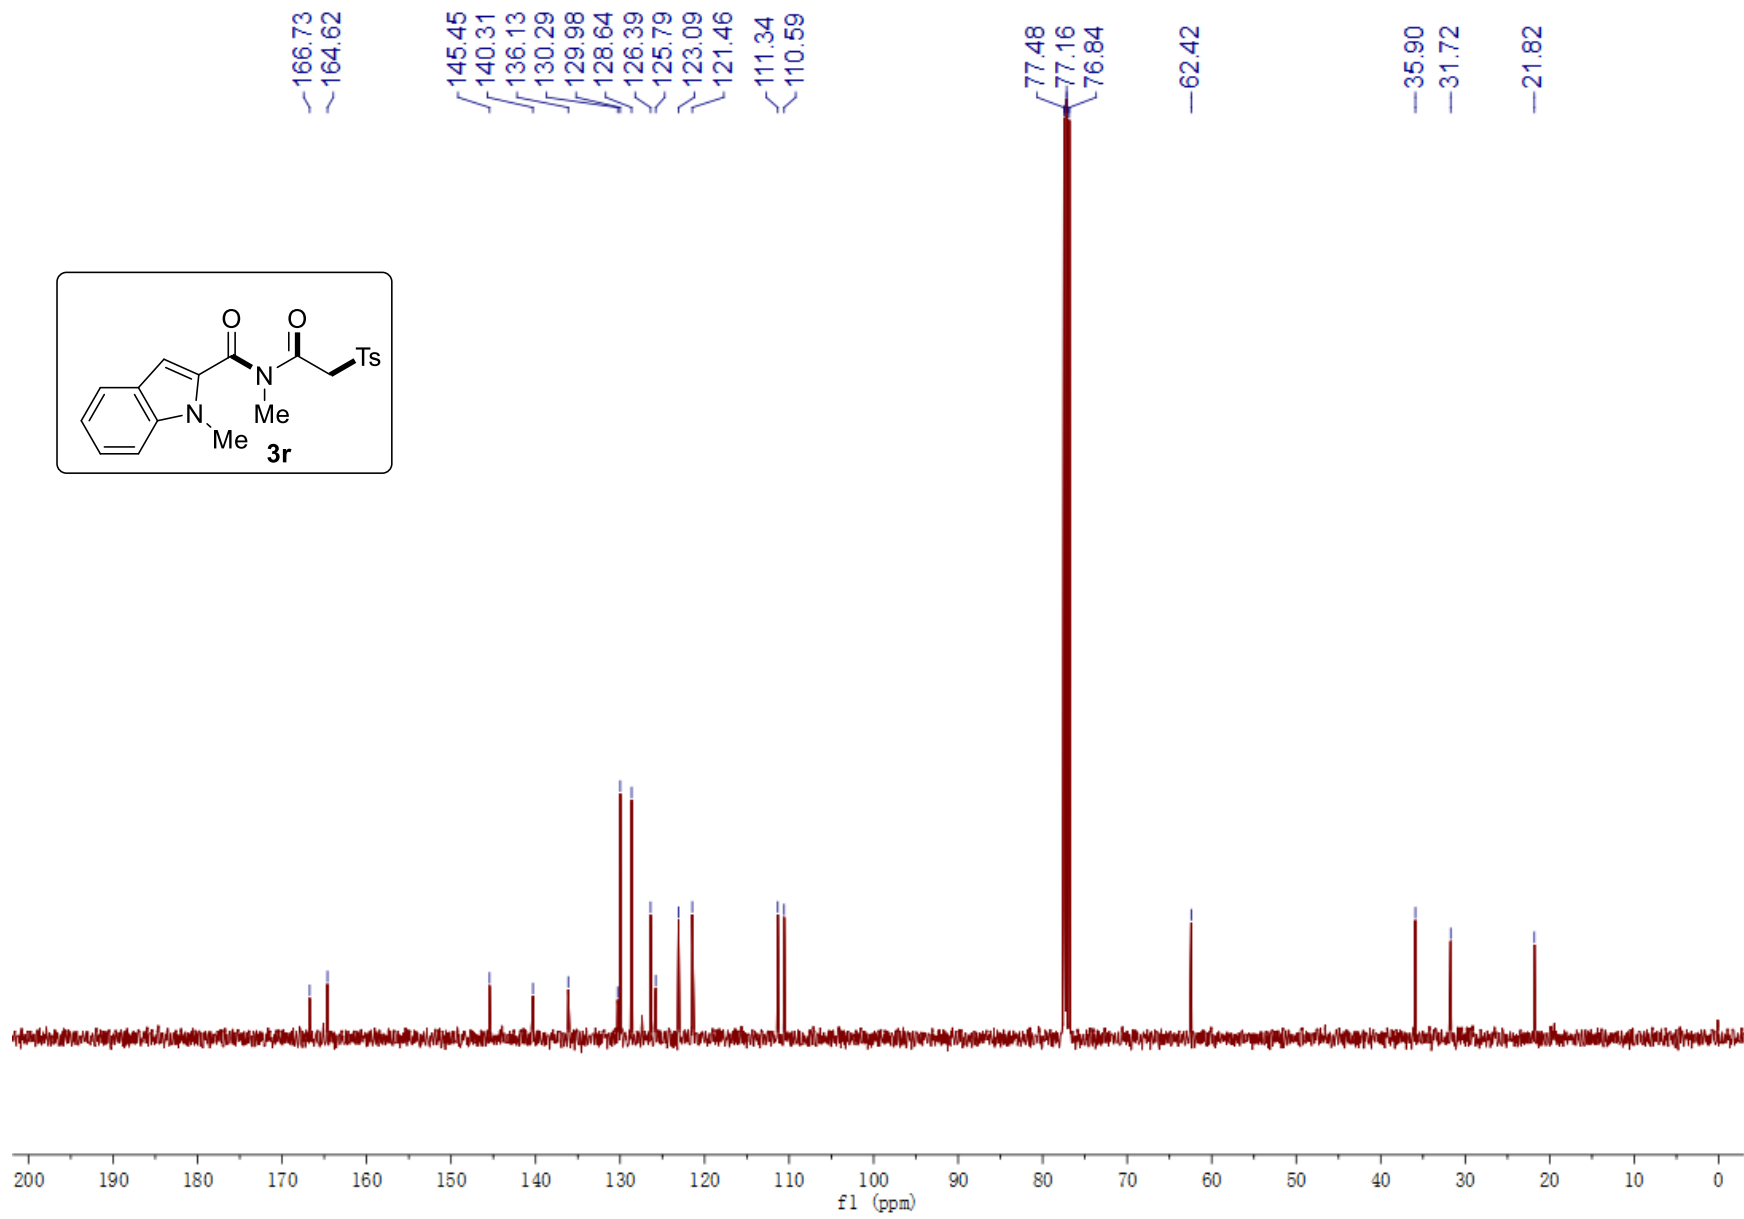

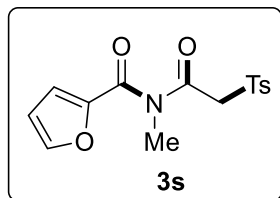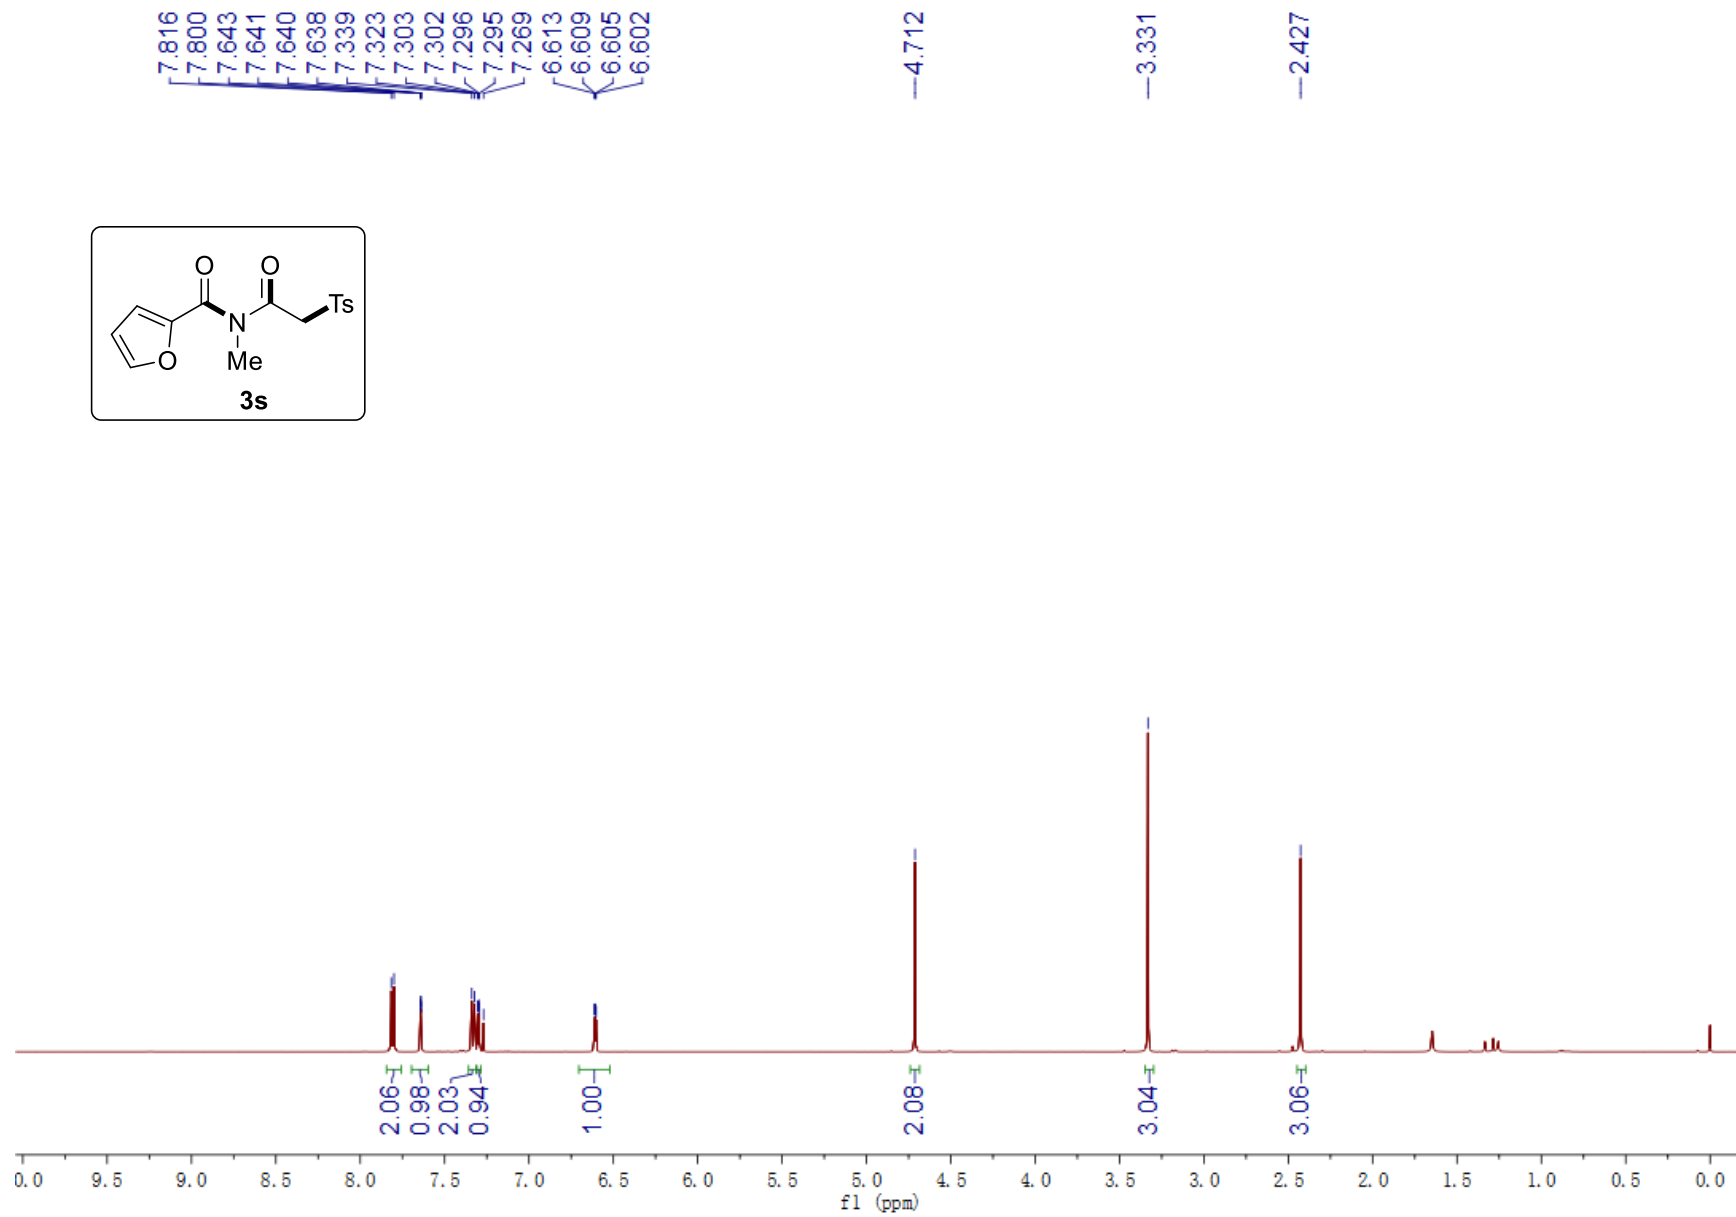

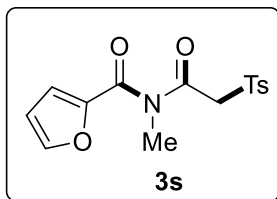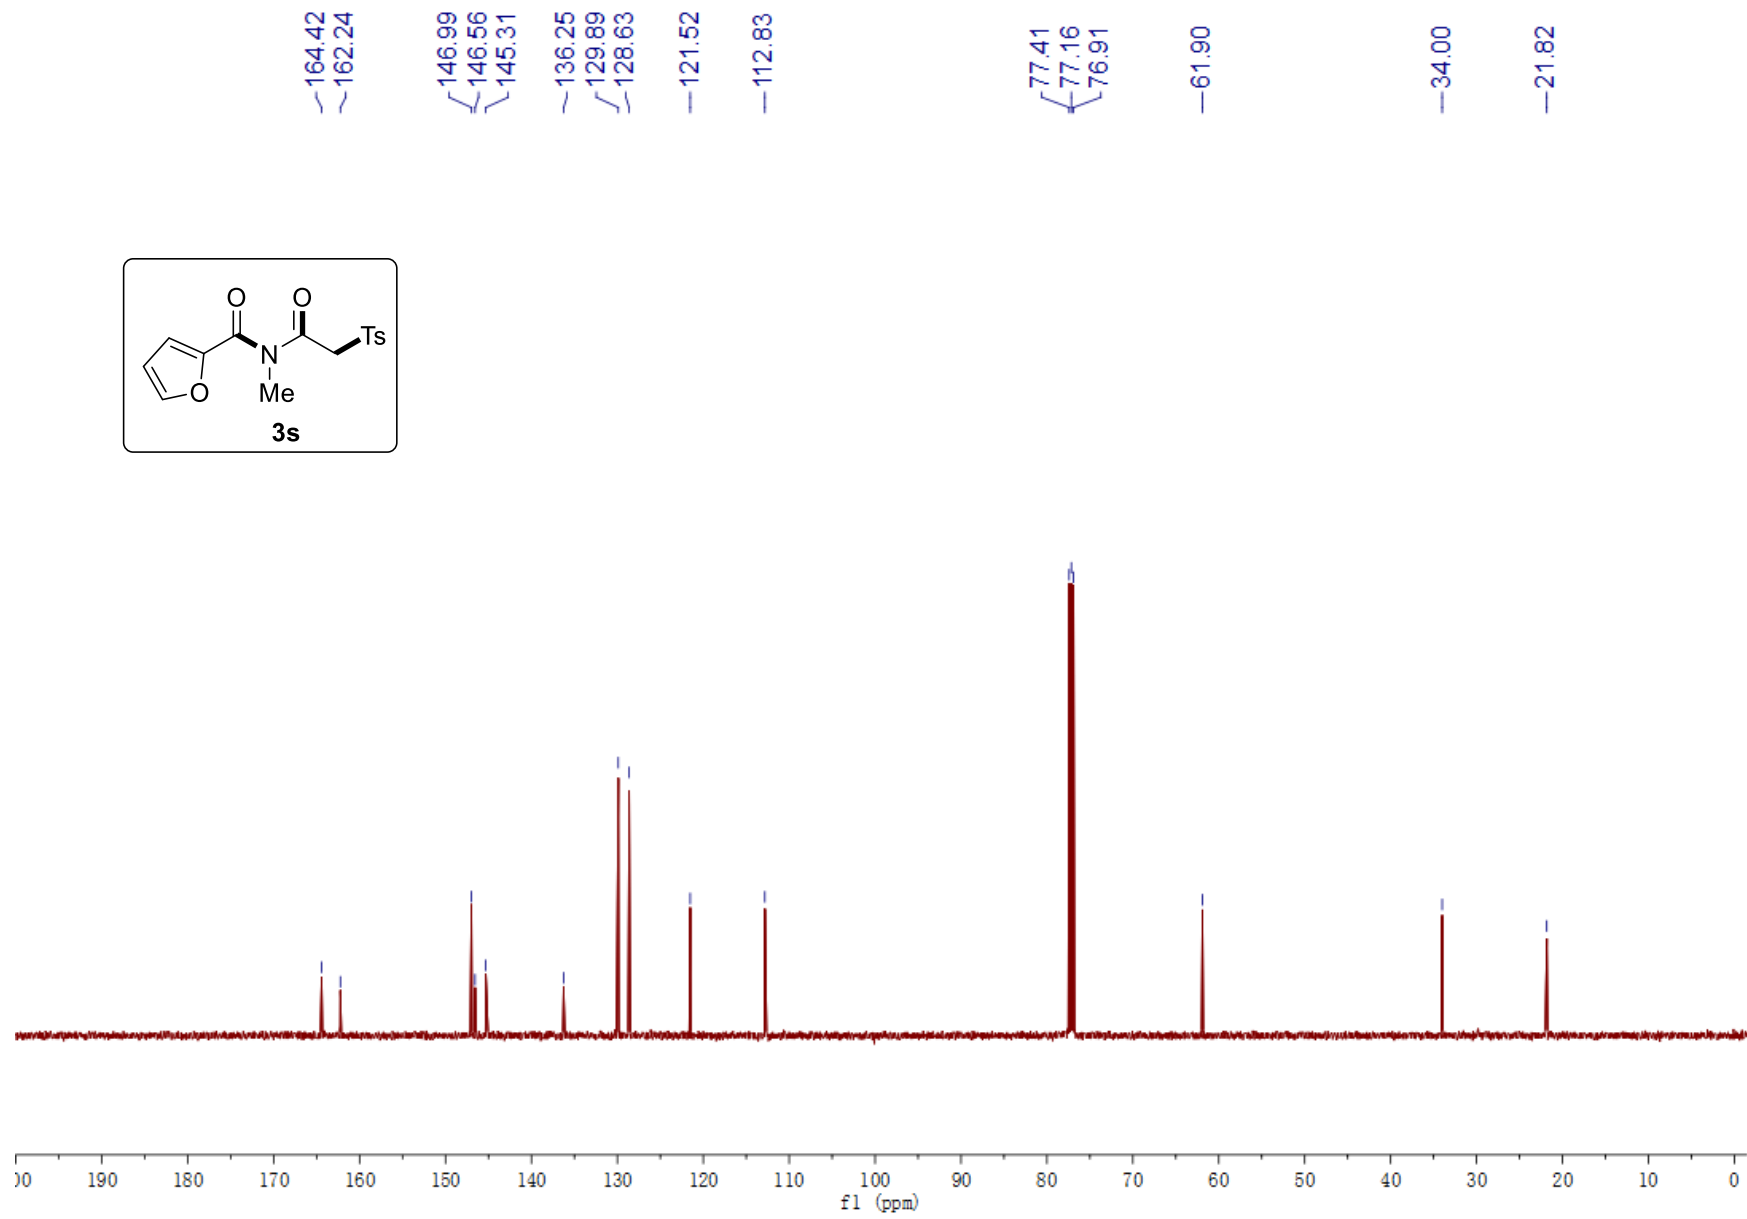



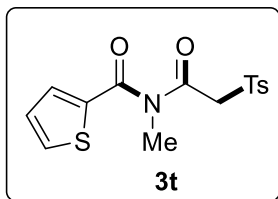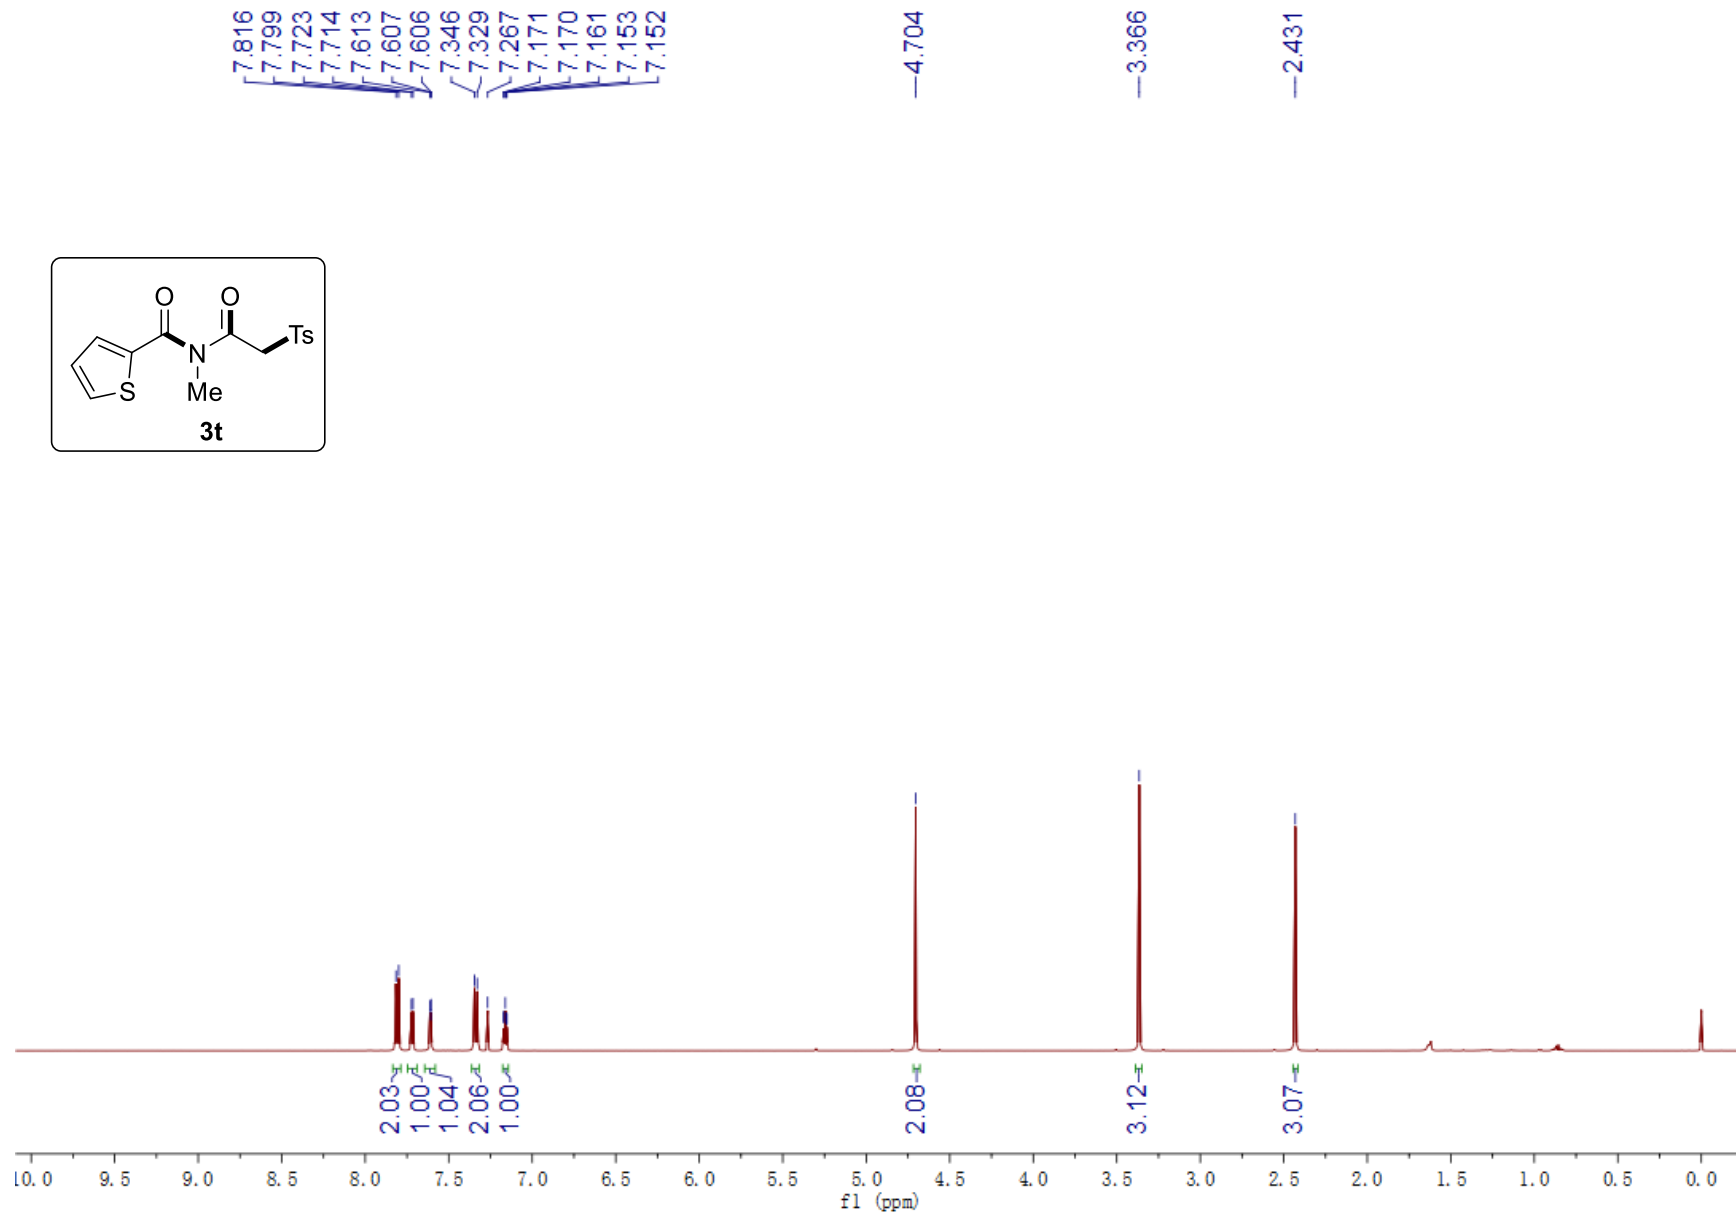

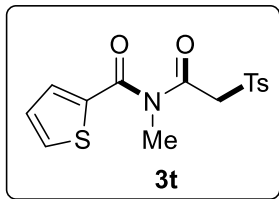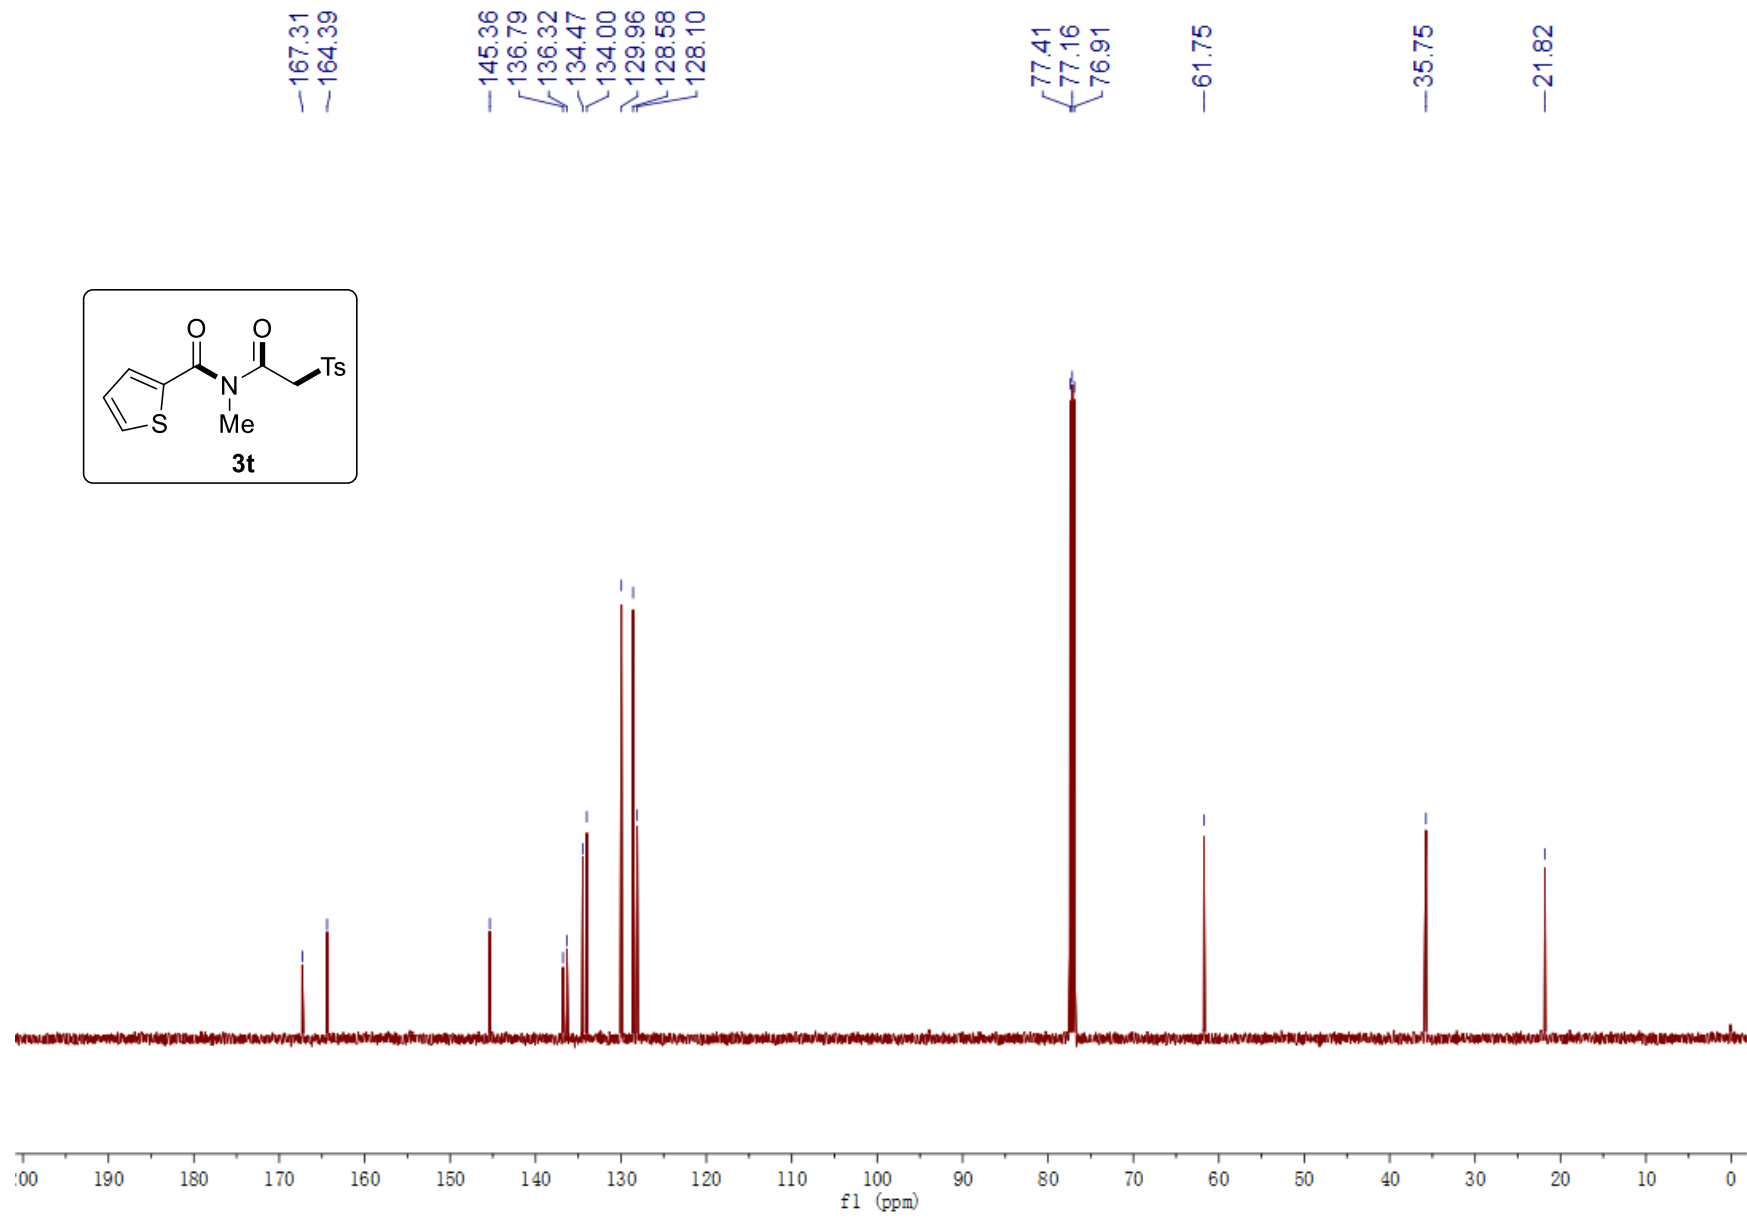

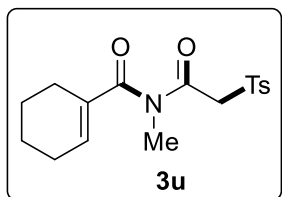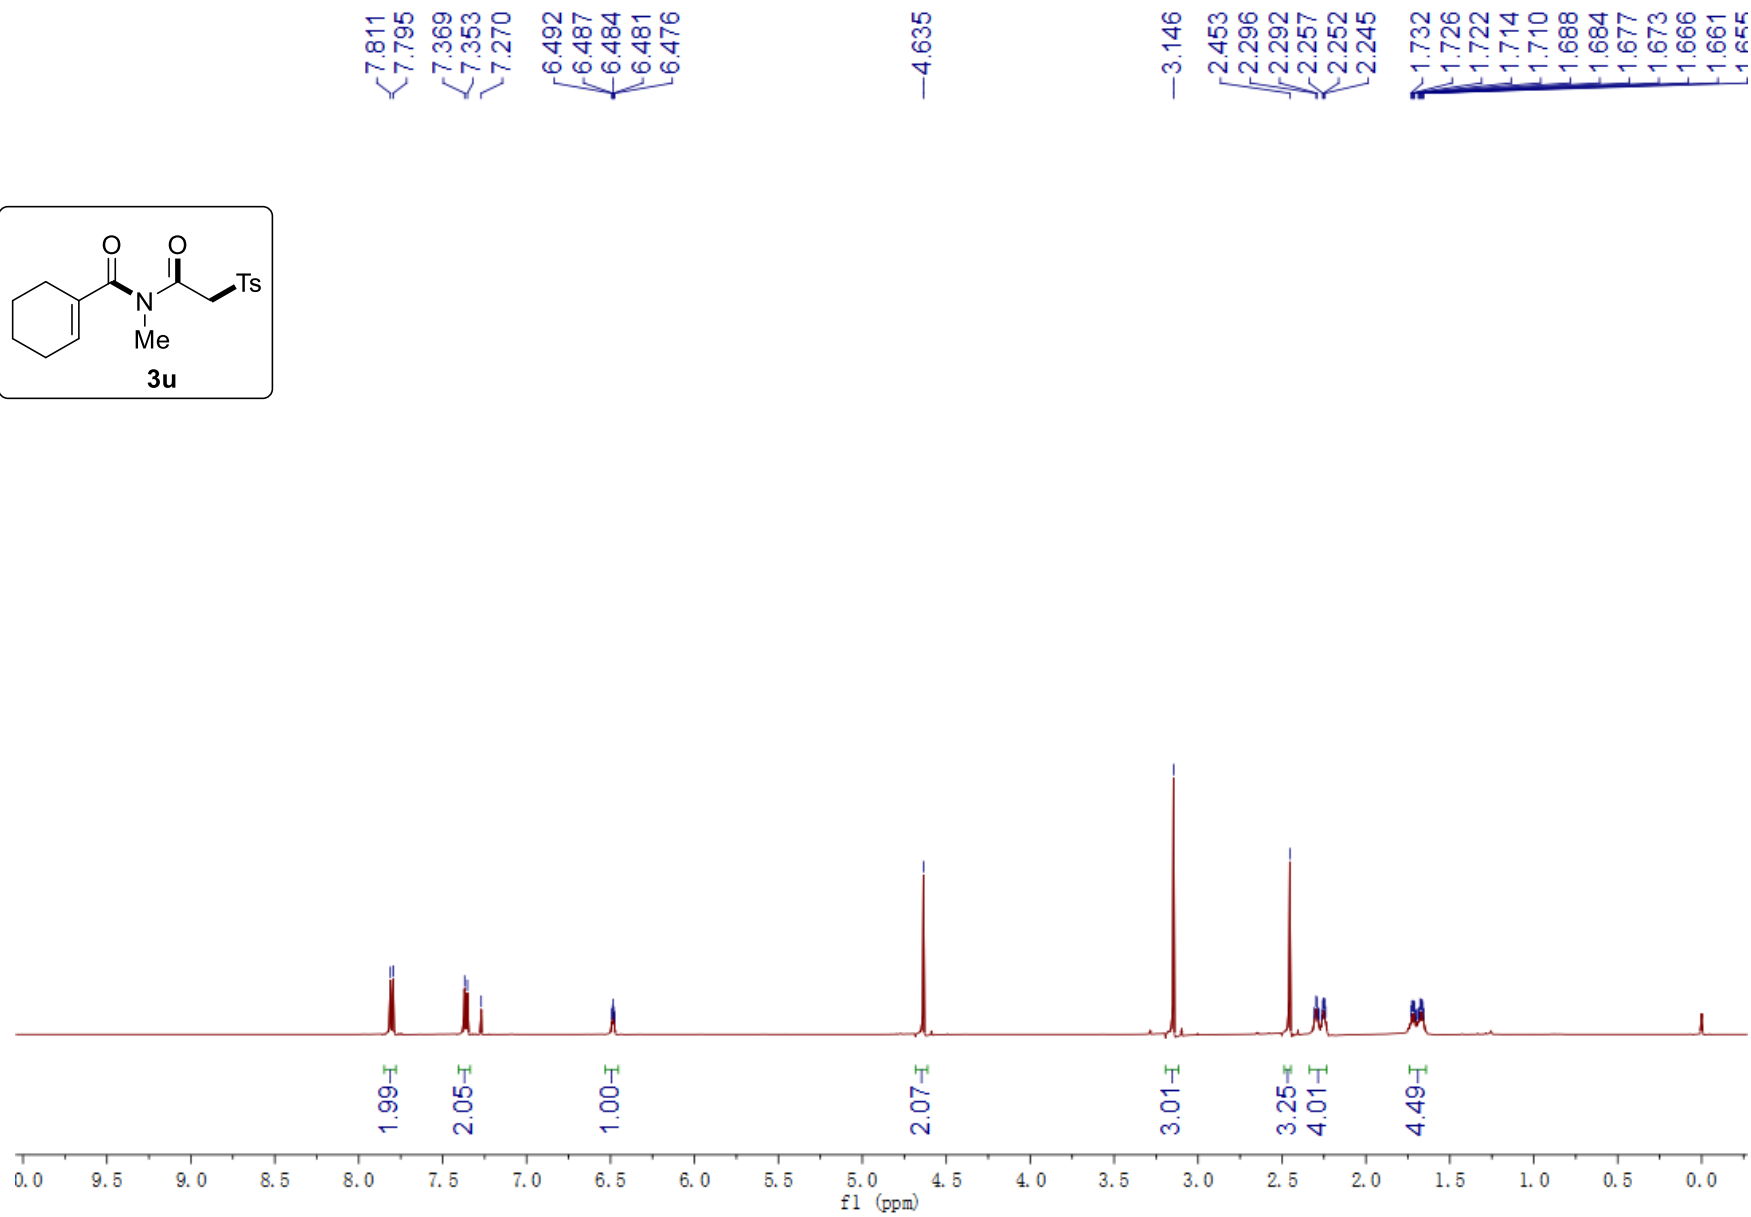

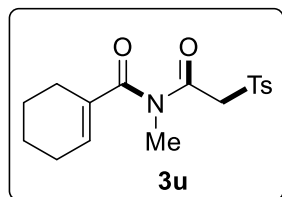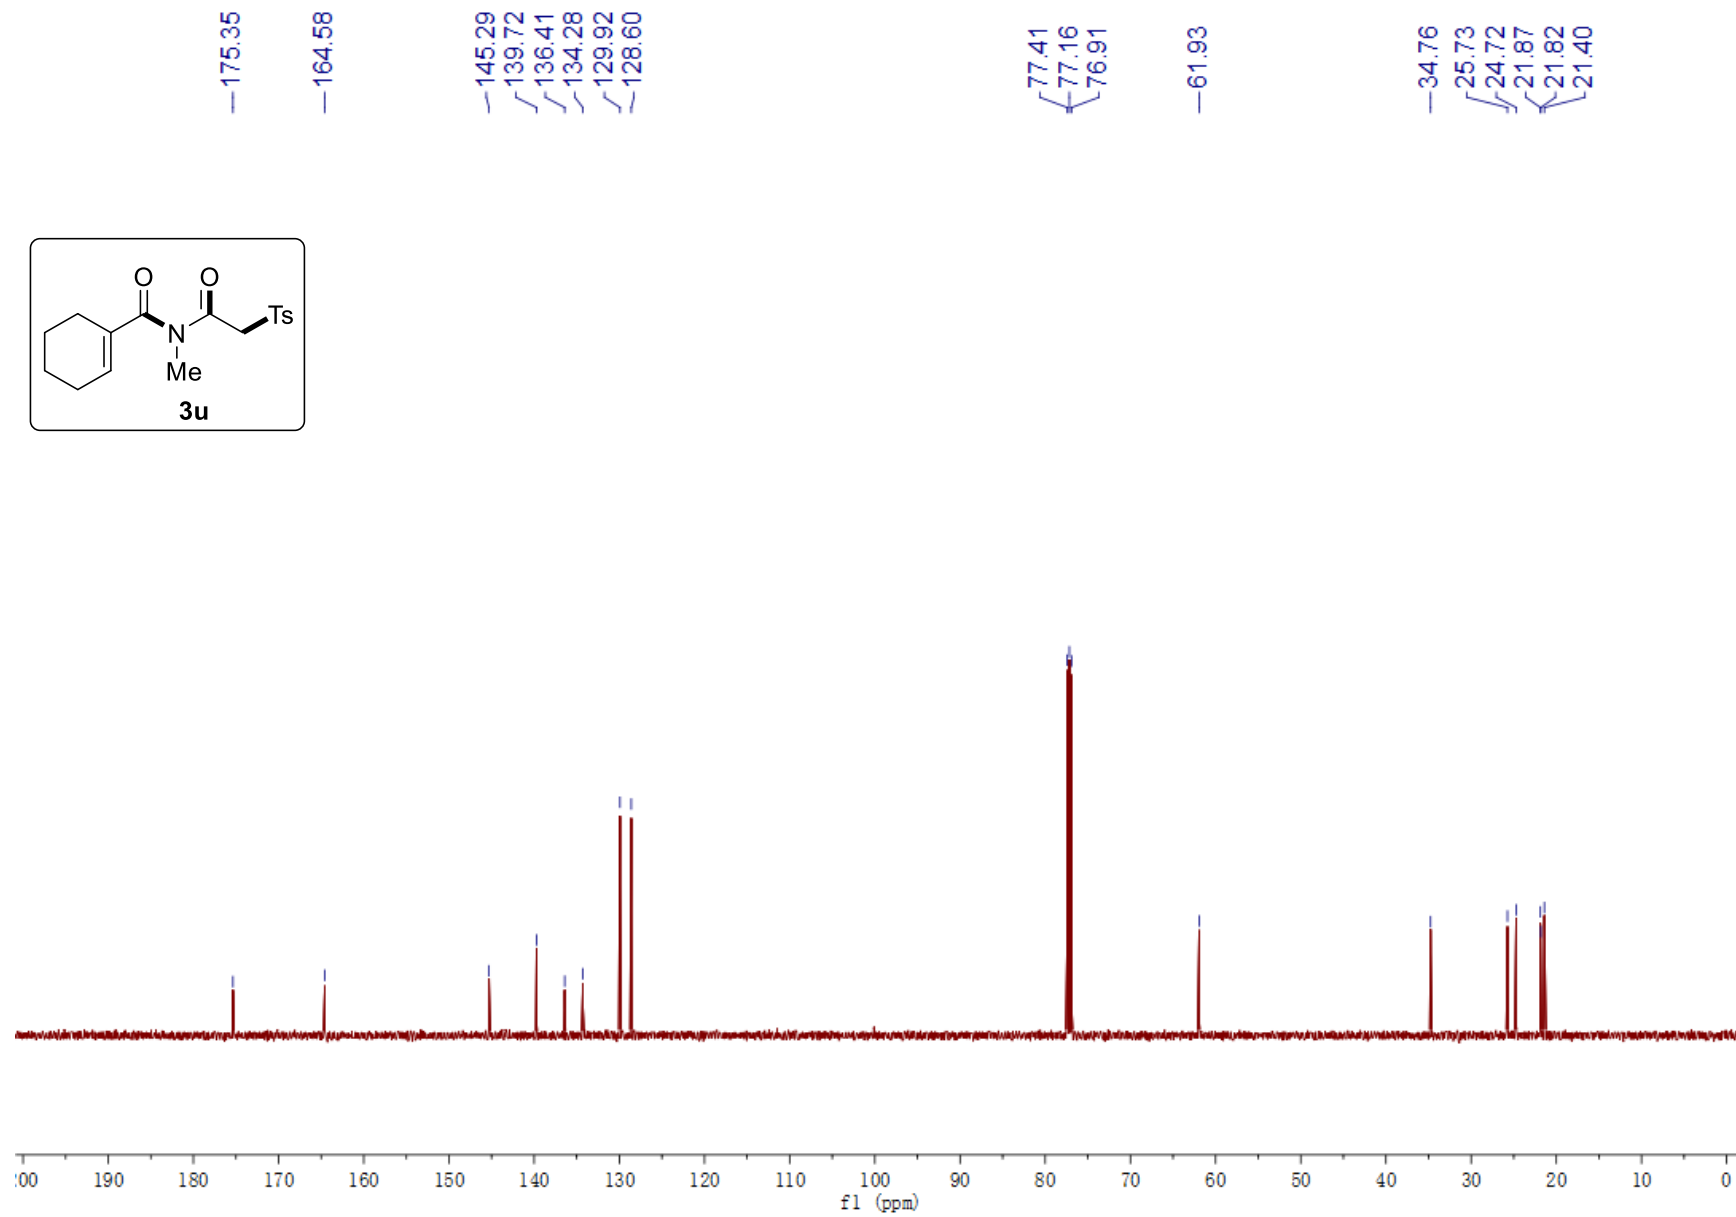

S100

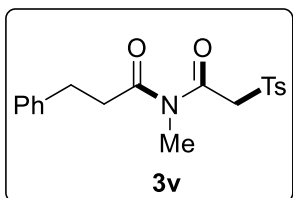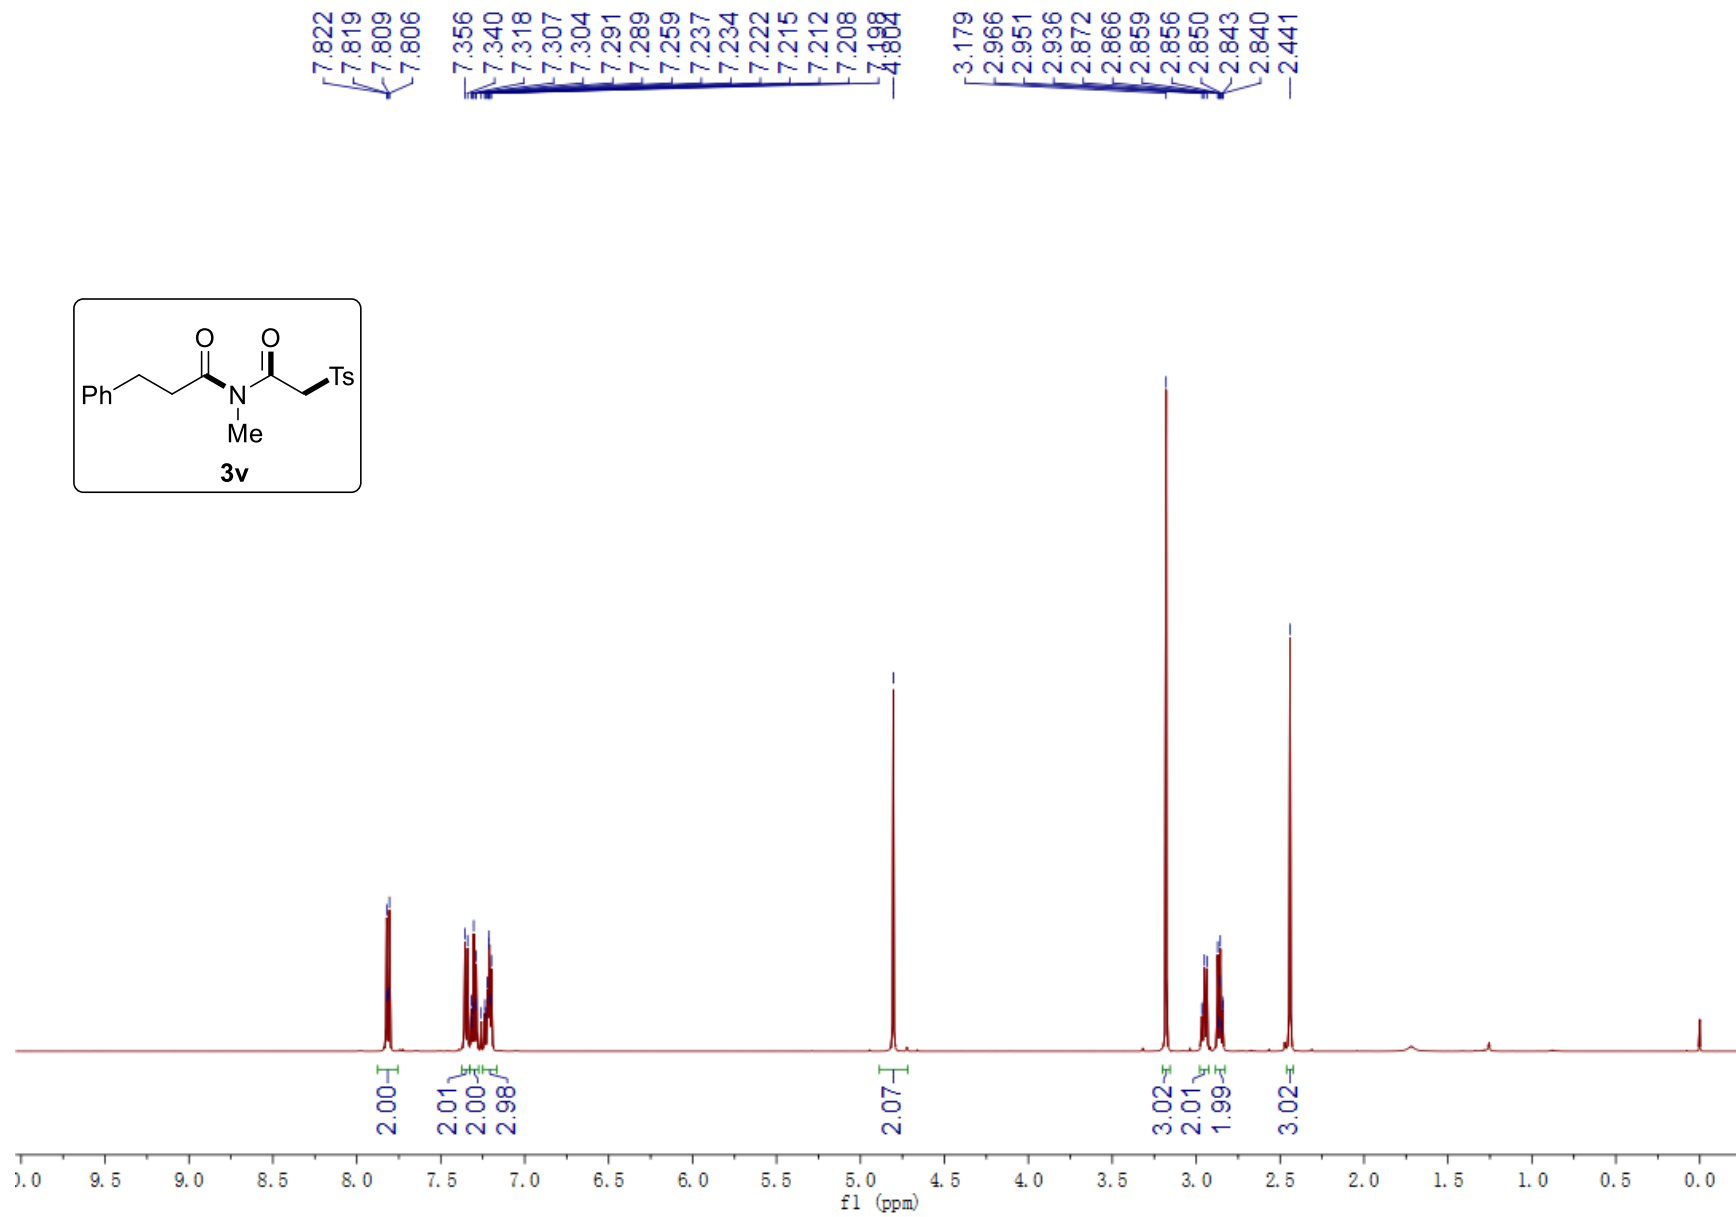

S101

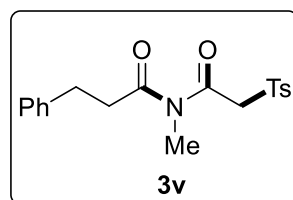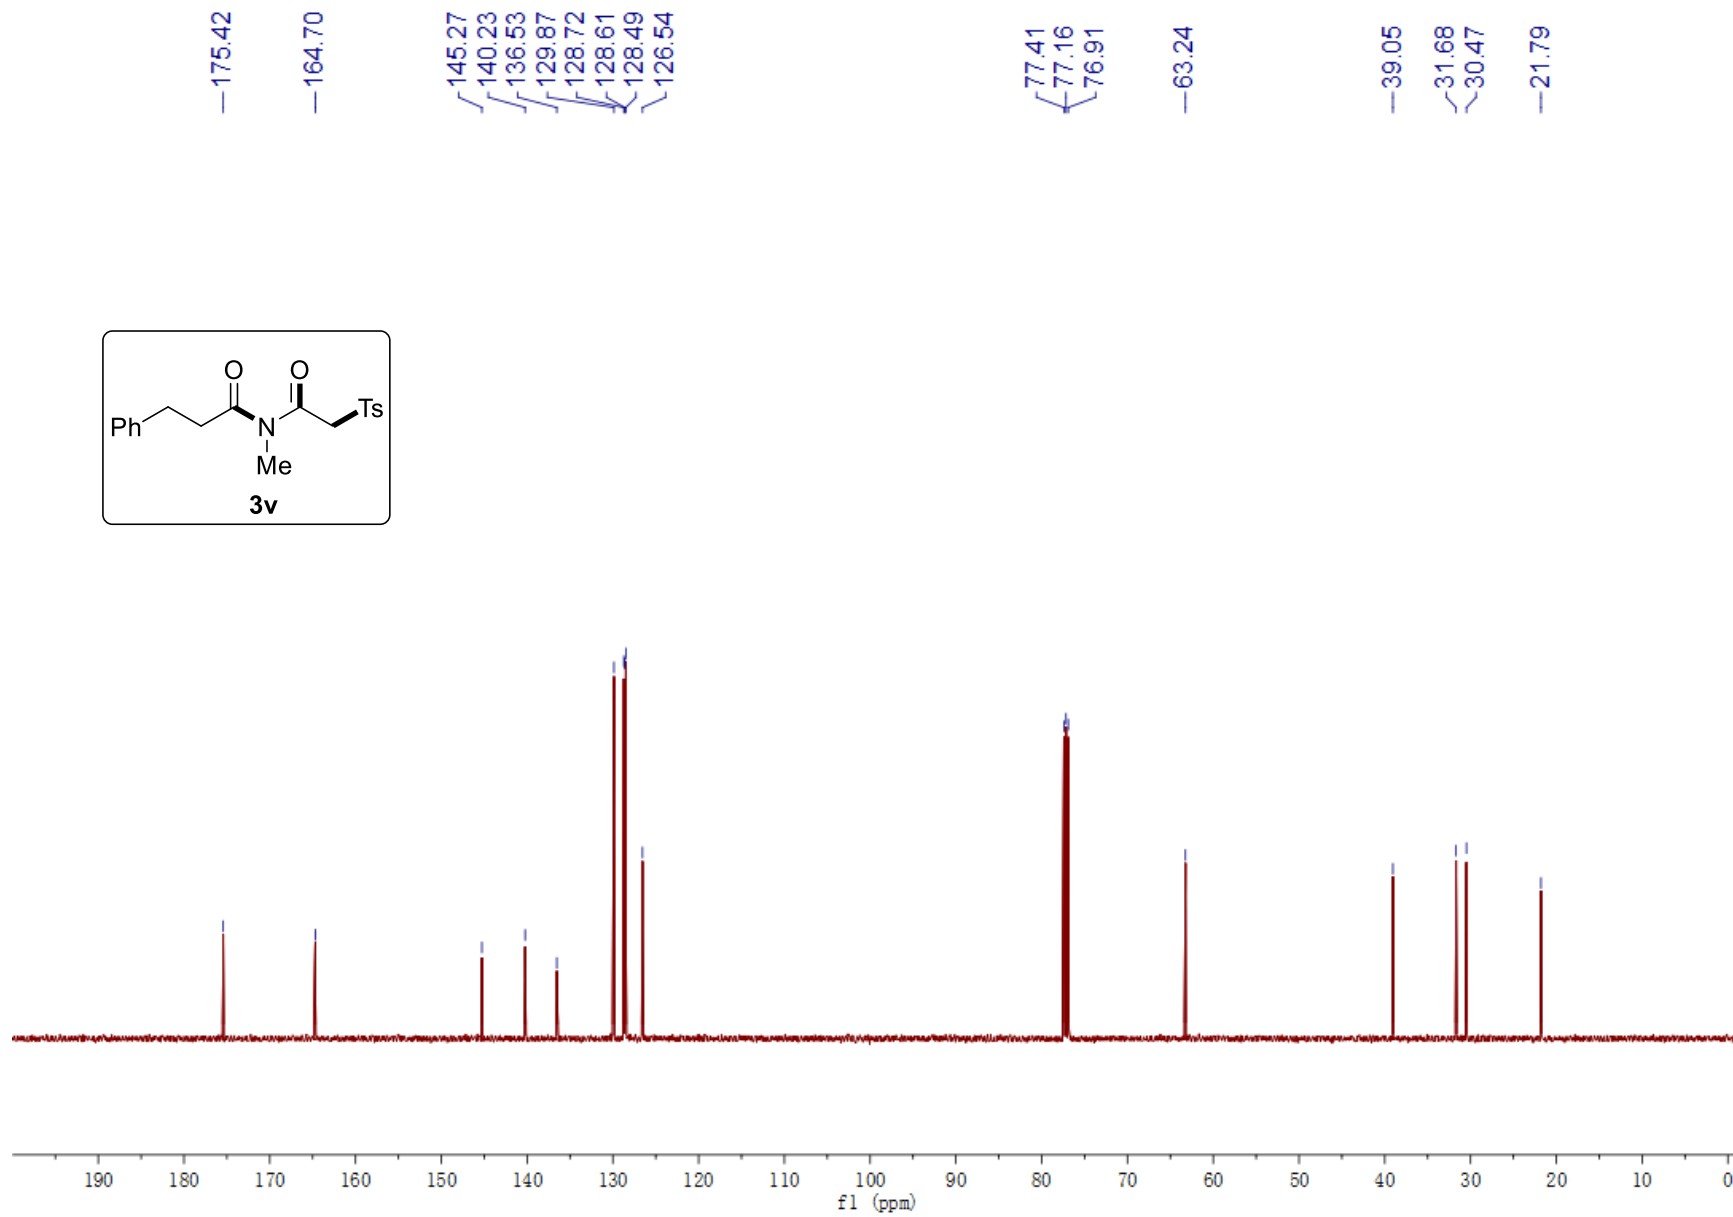

S102

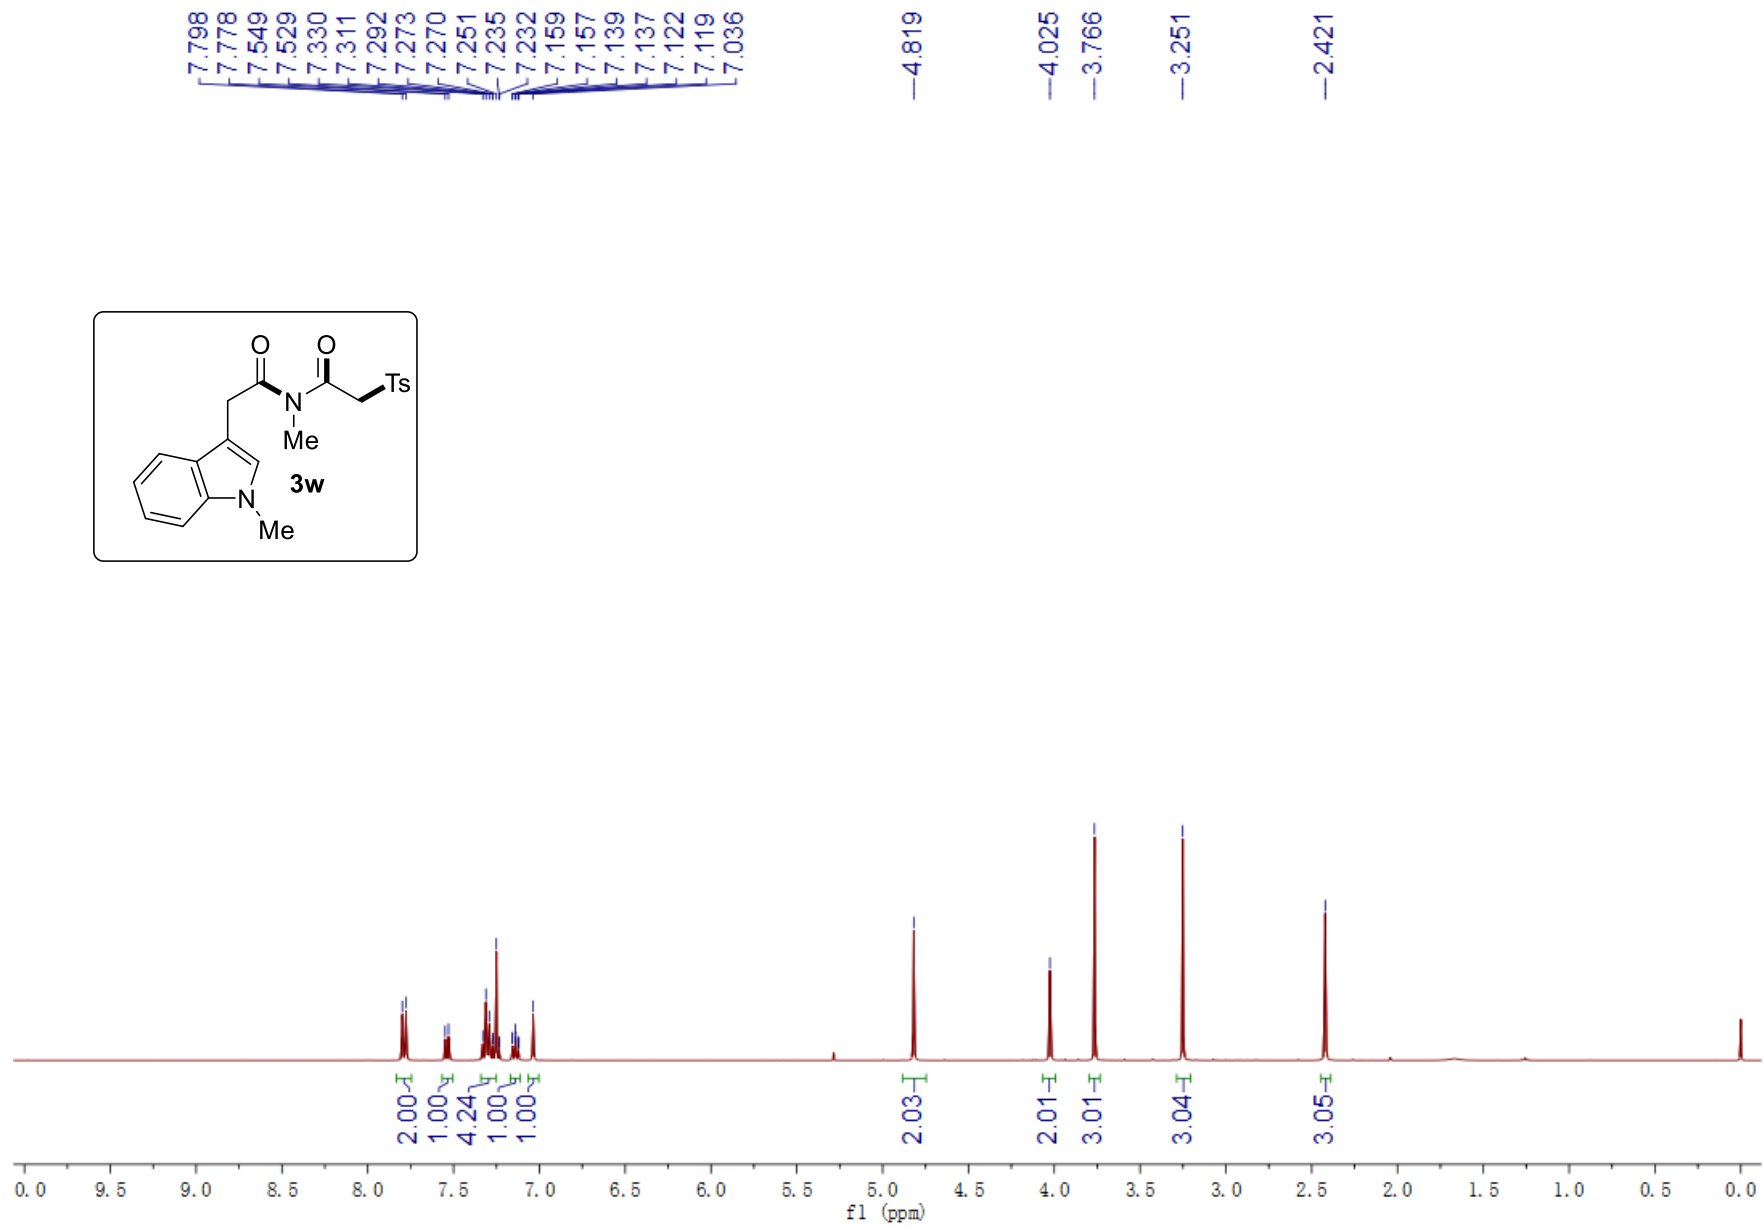

S103

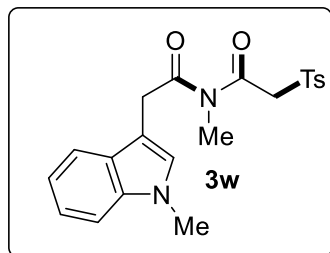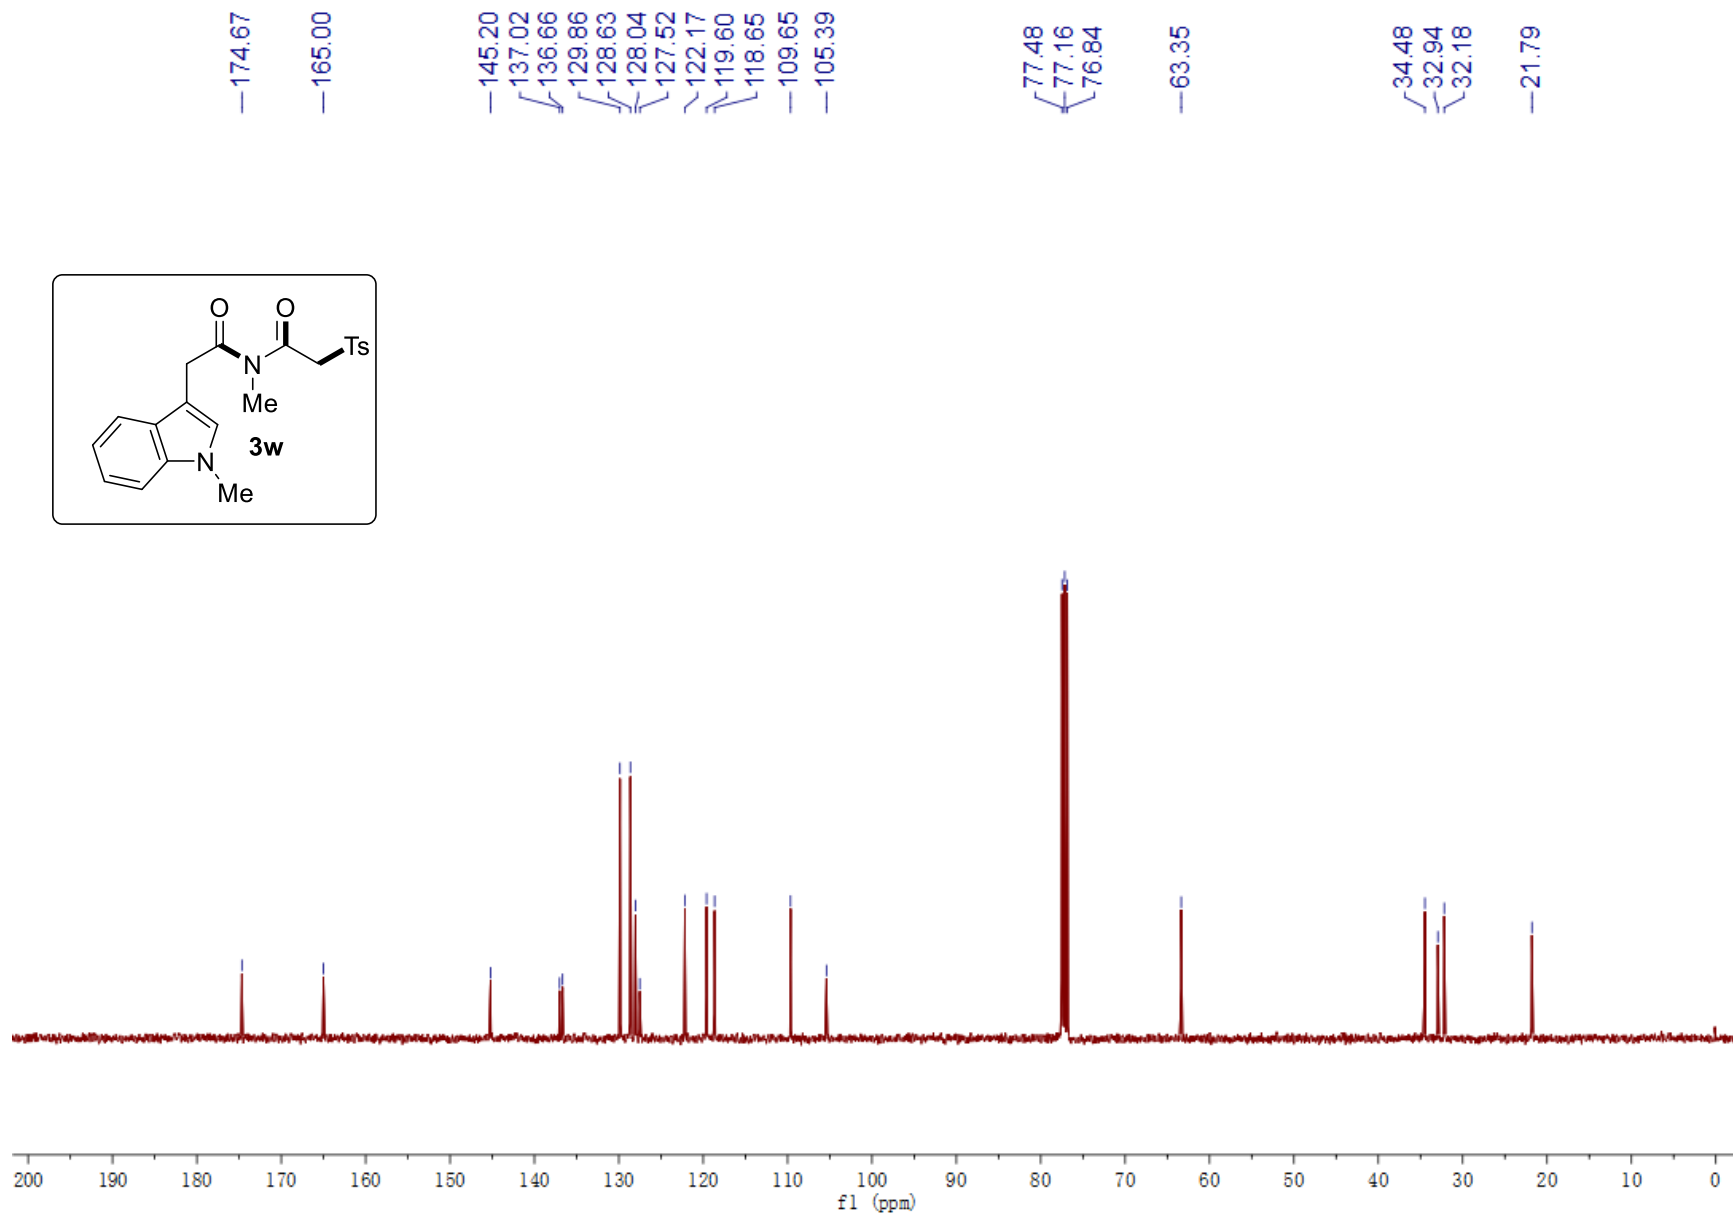

S104



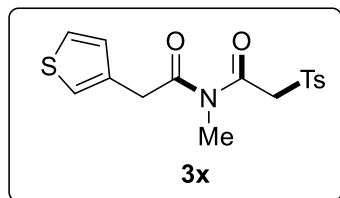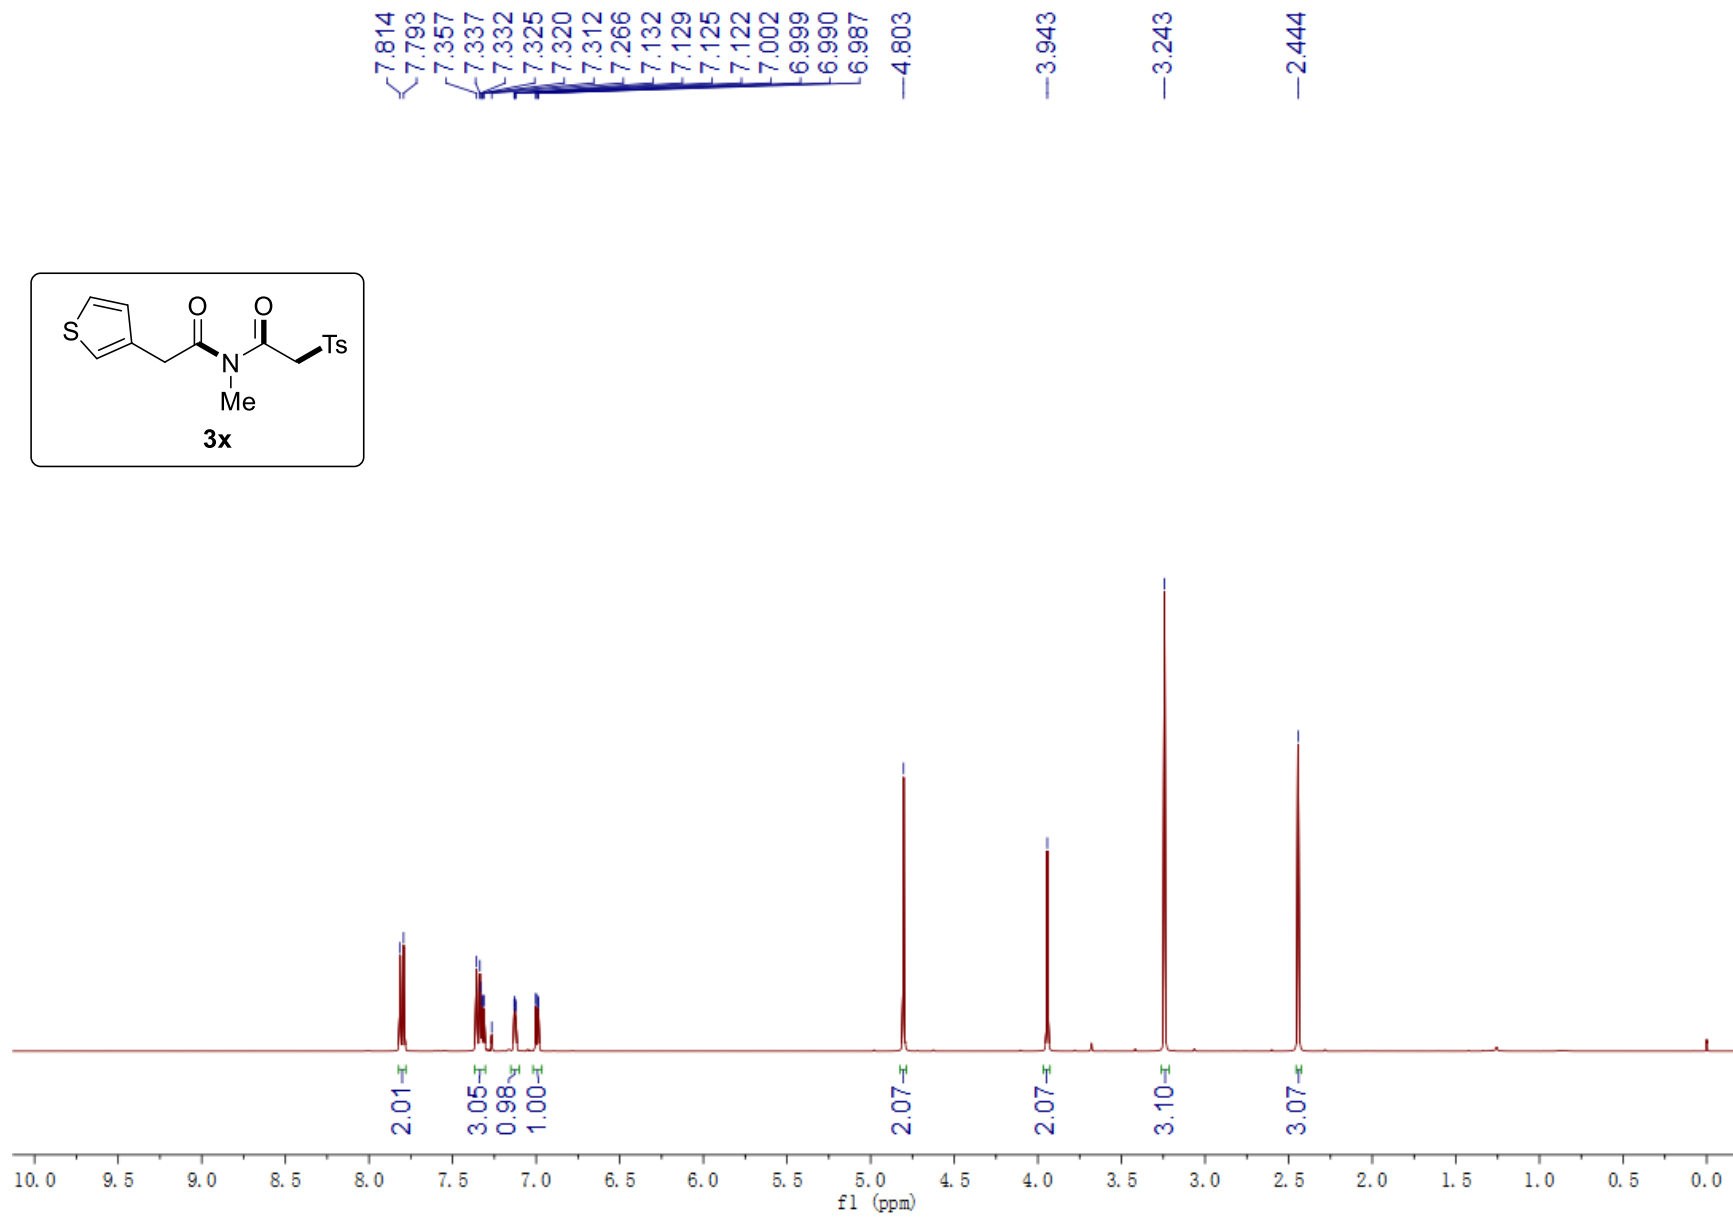

S105

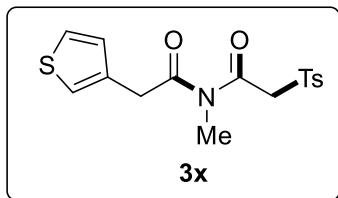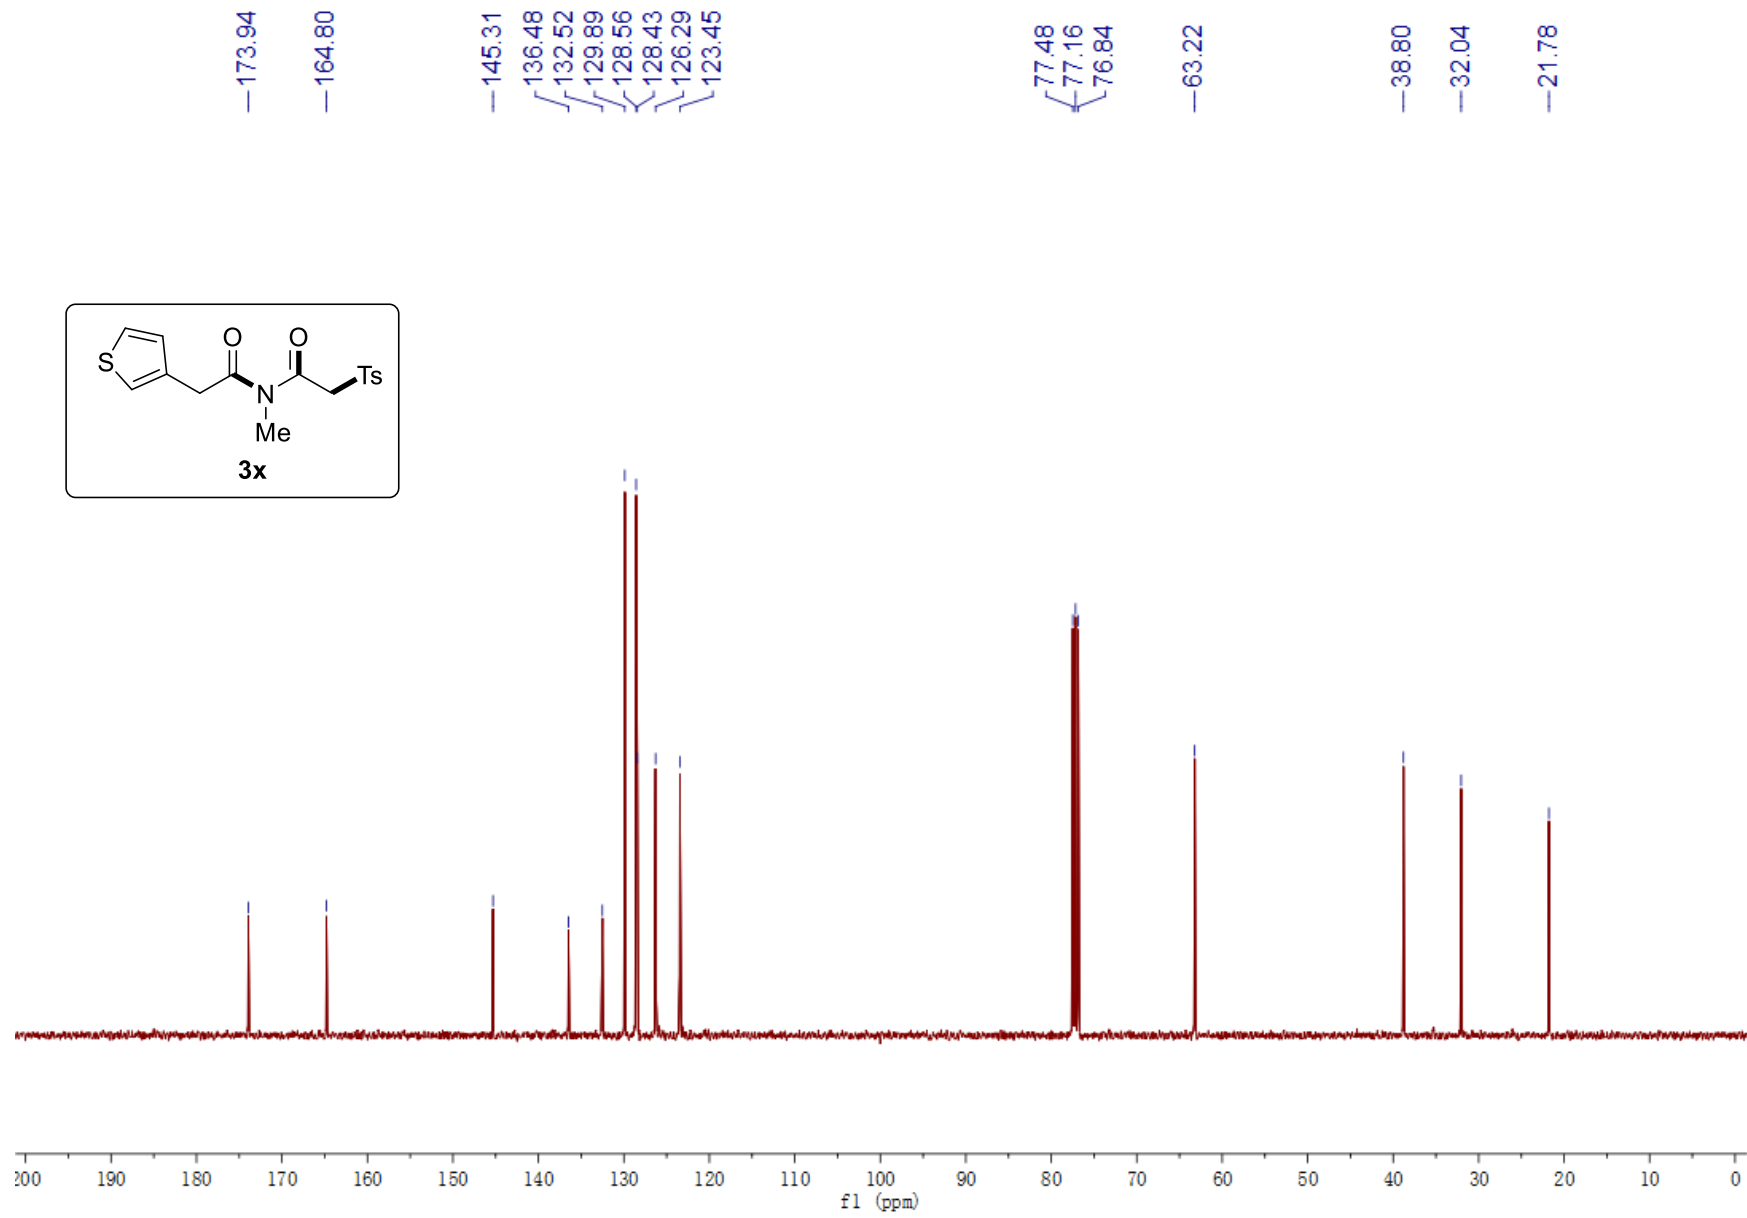

S106

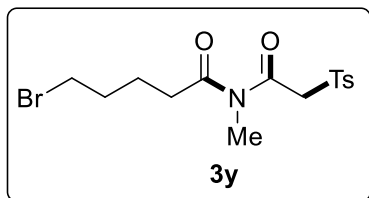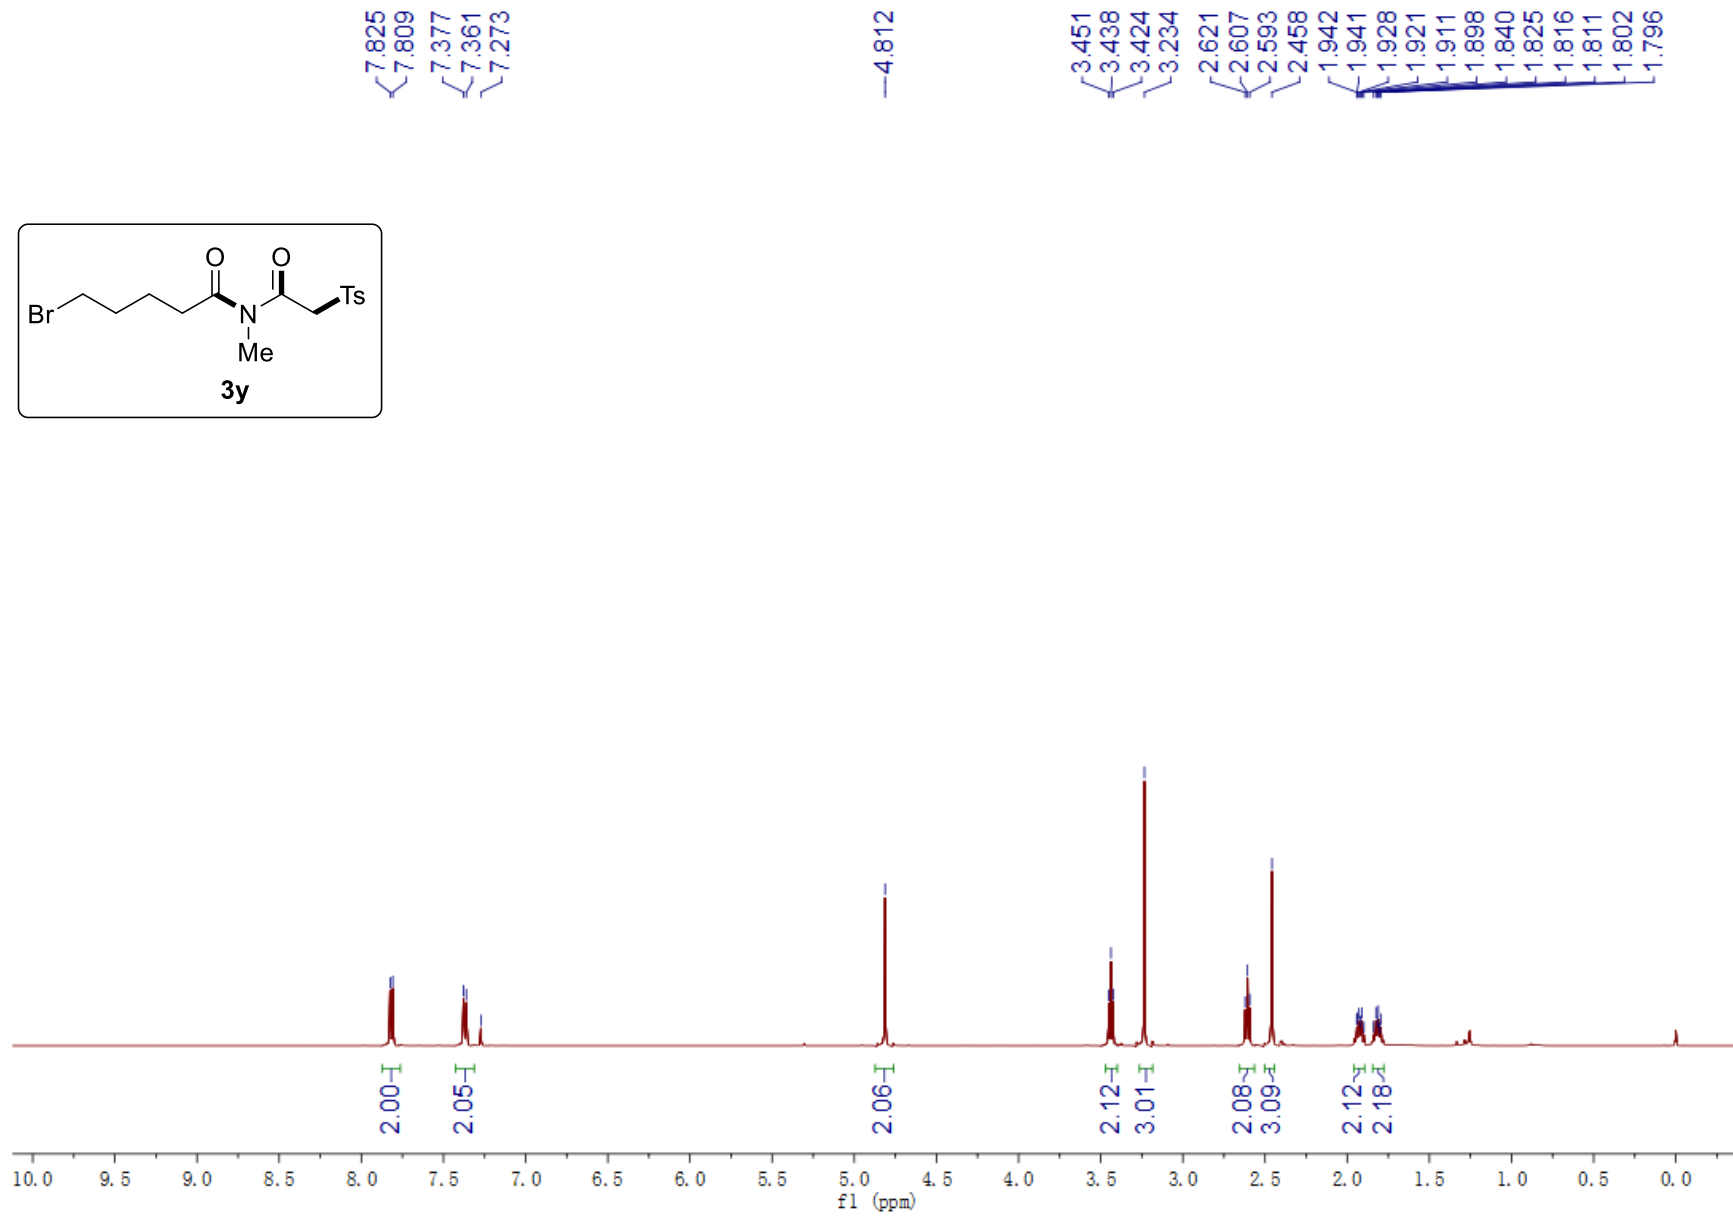

S107

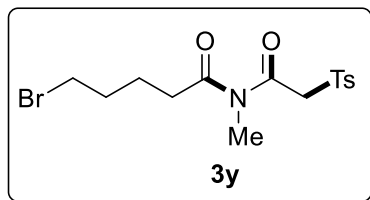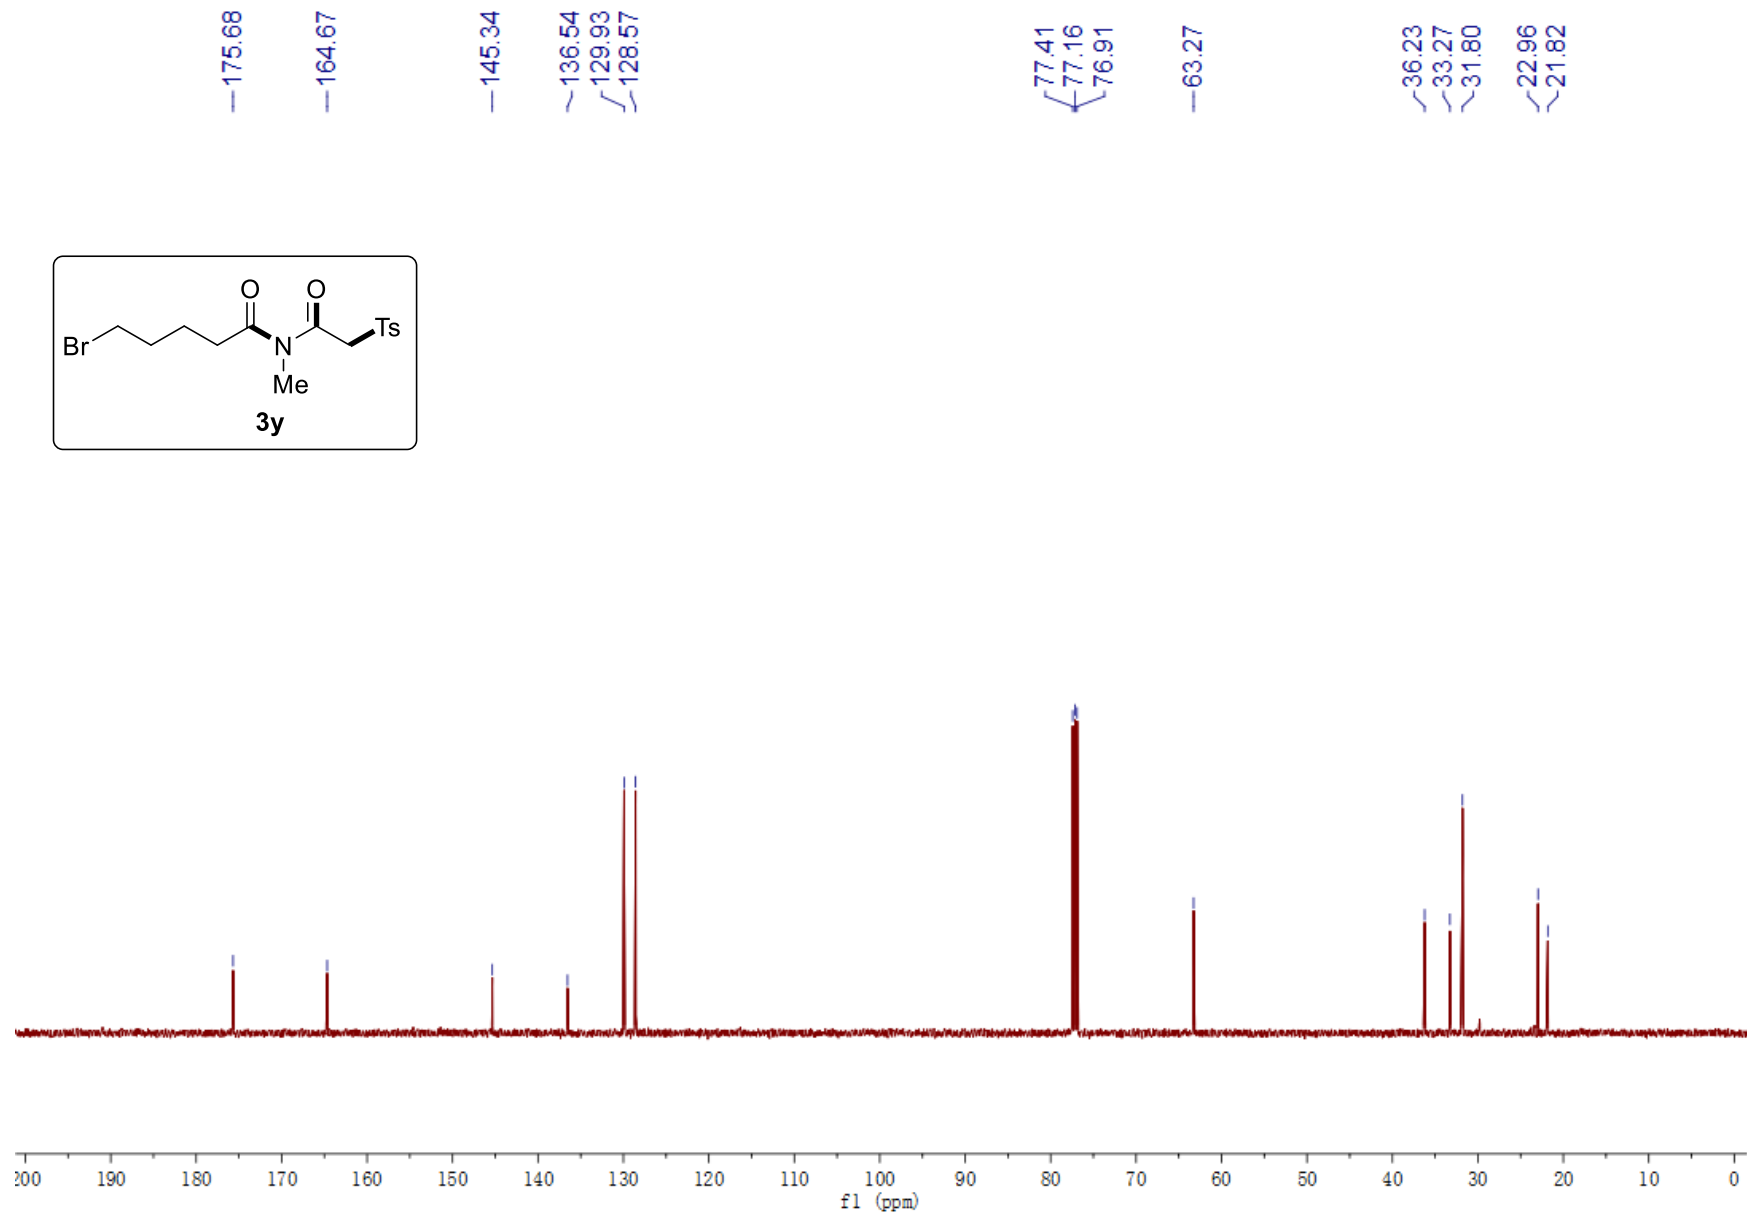

S108

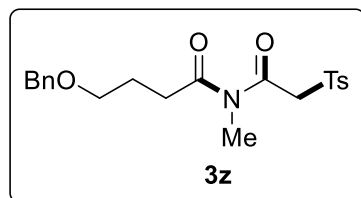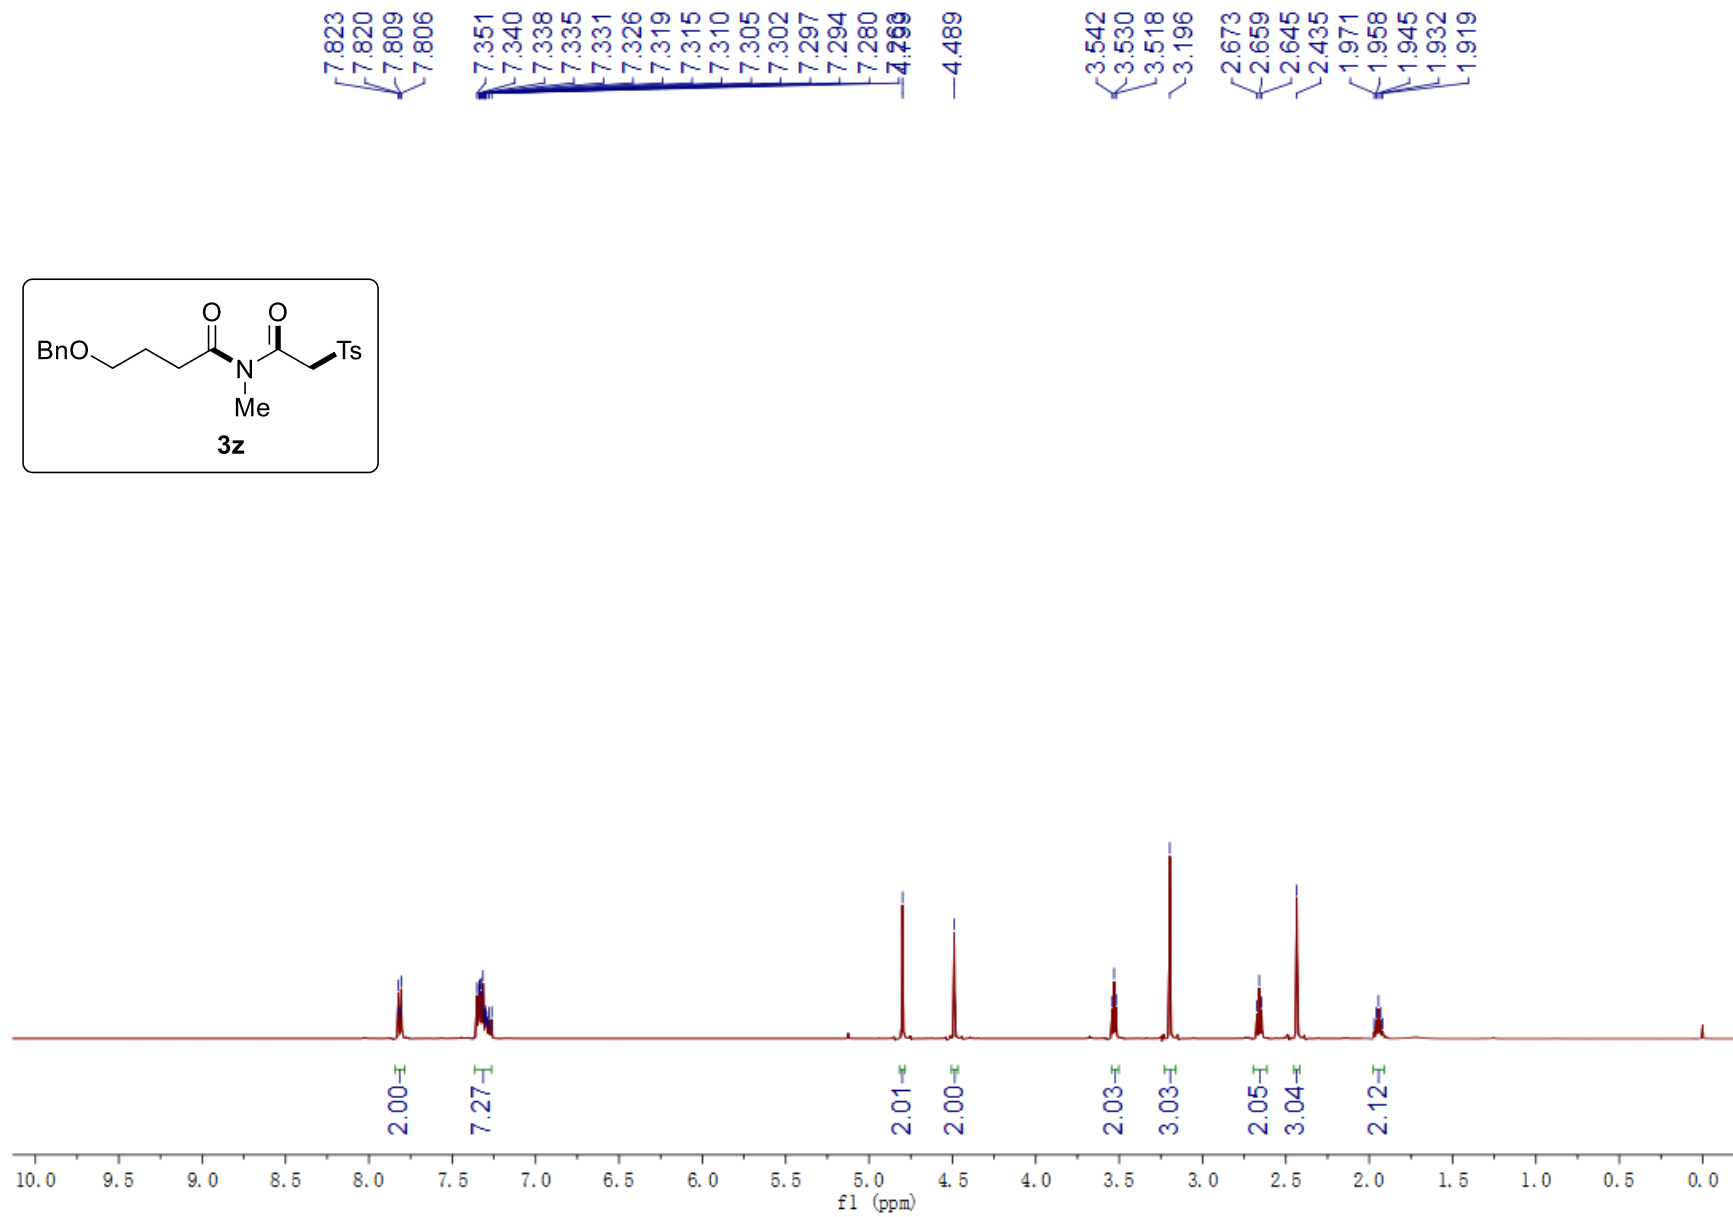

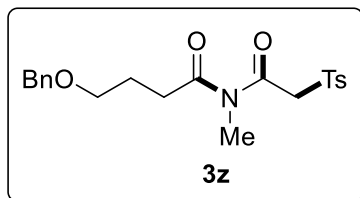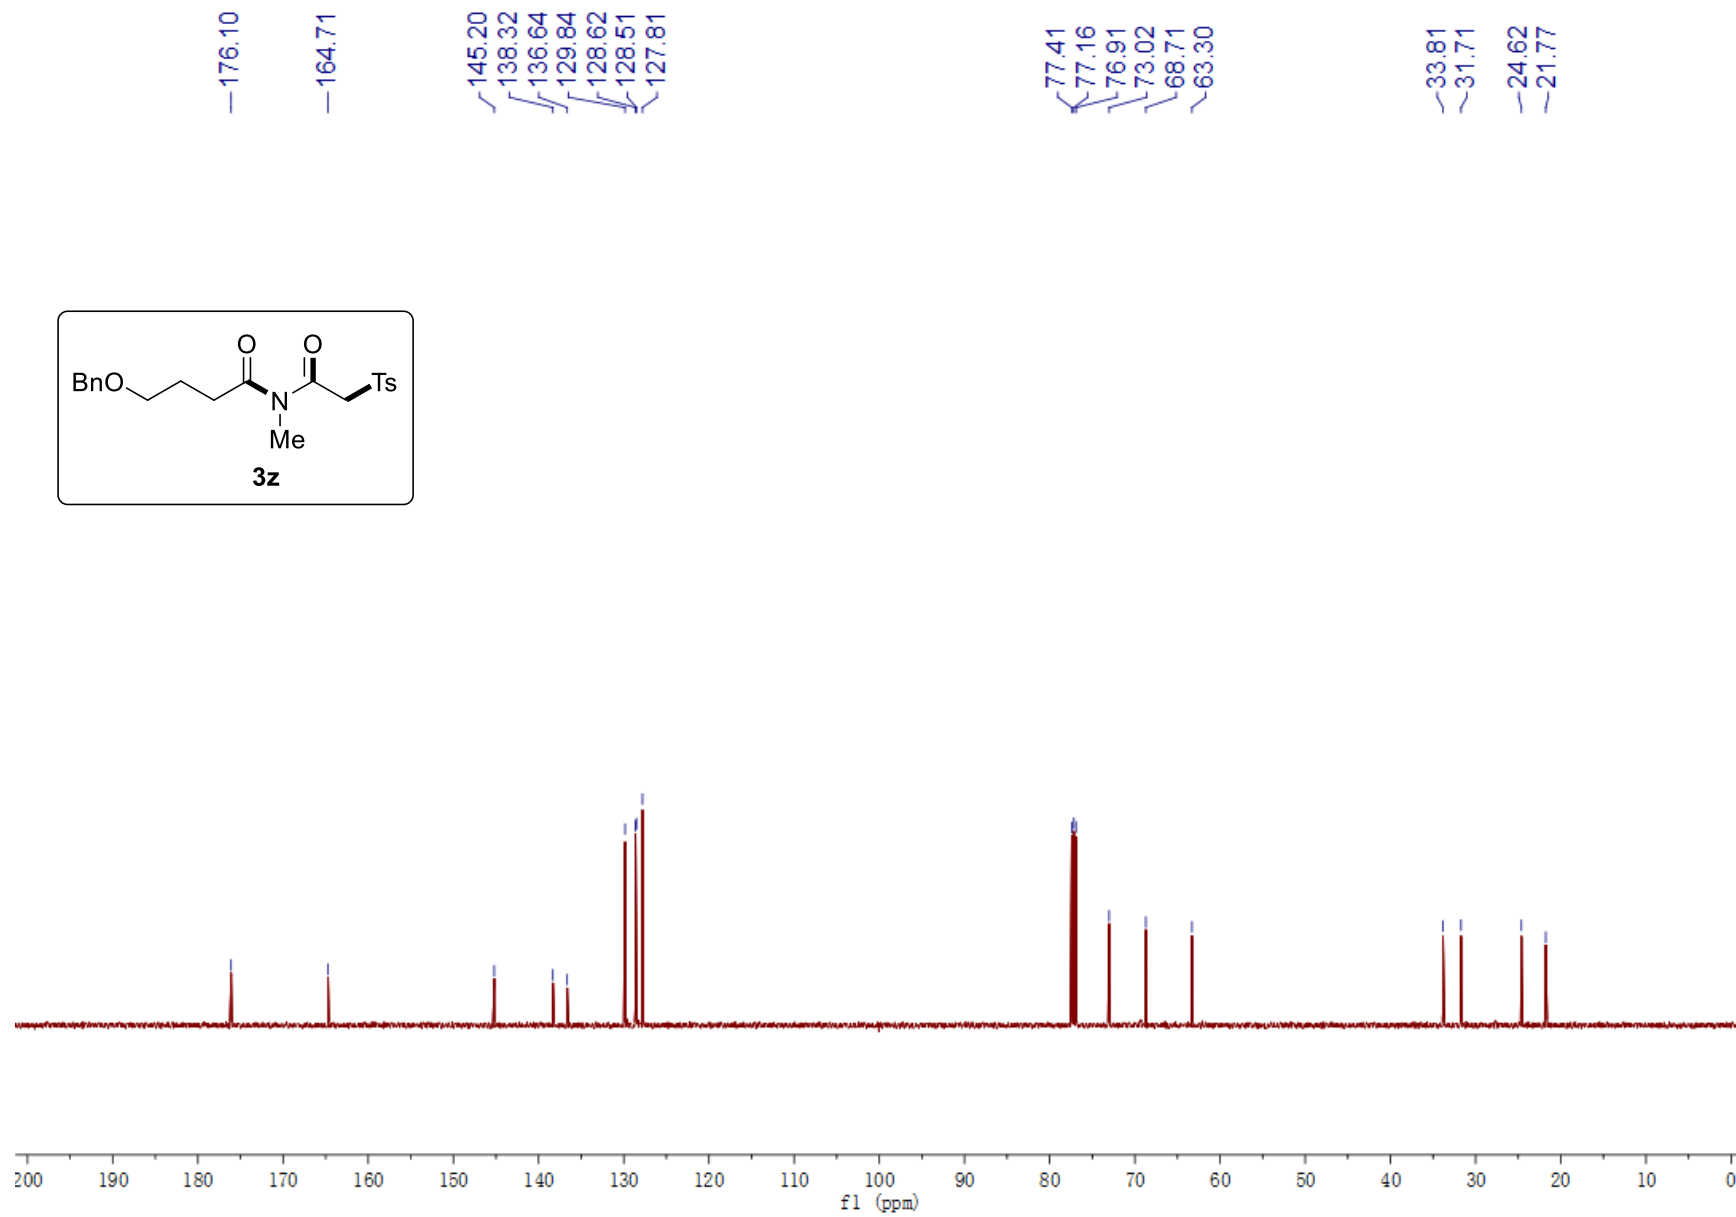

S110

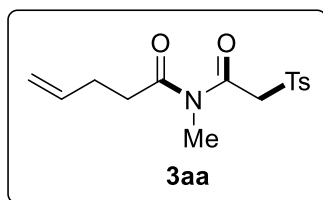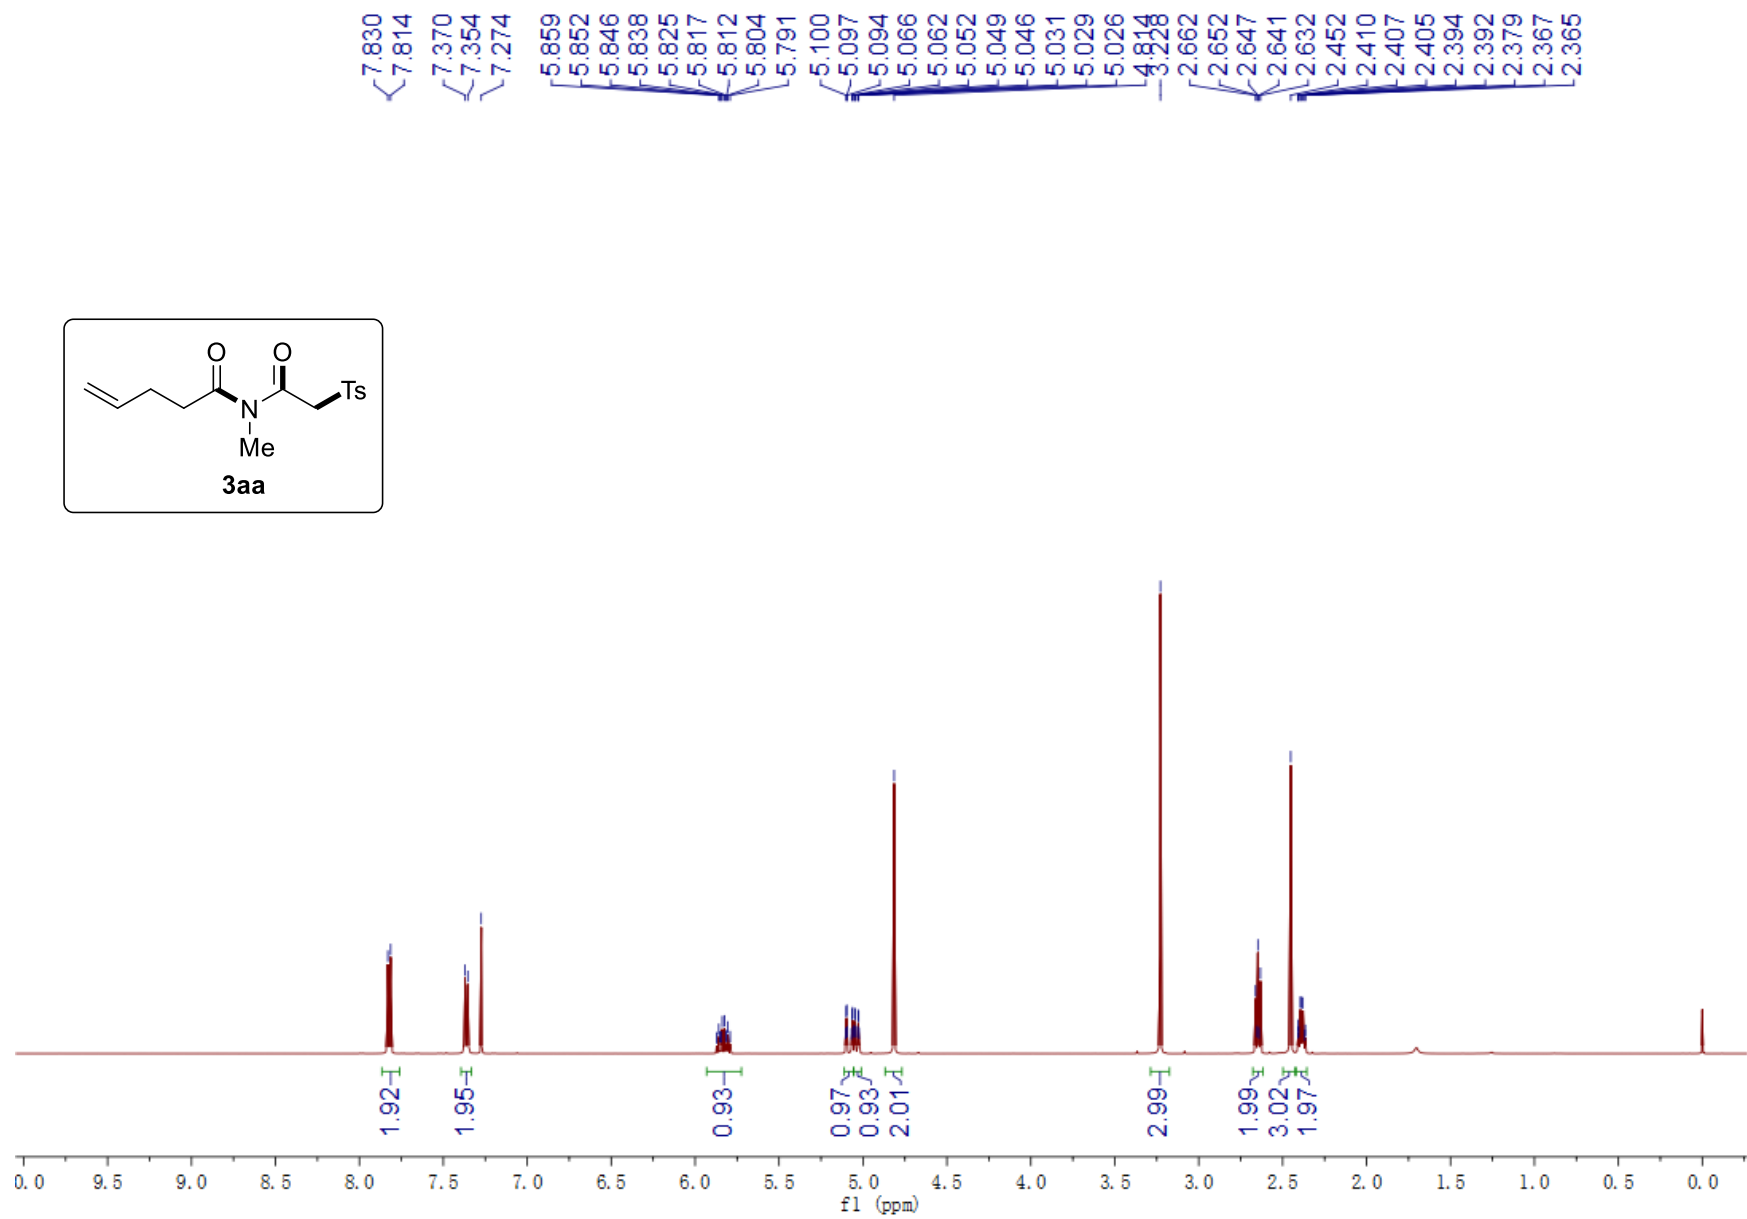

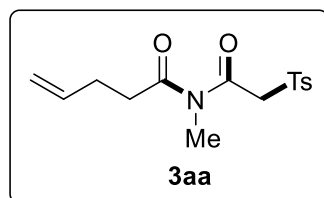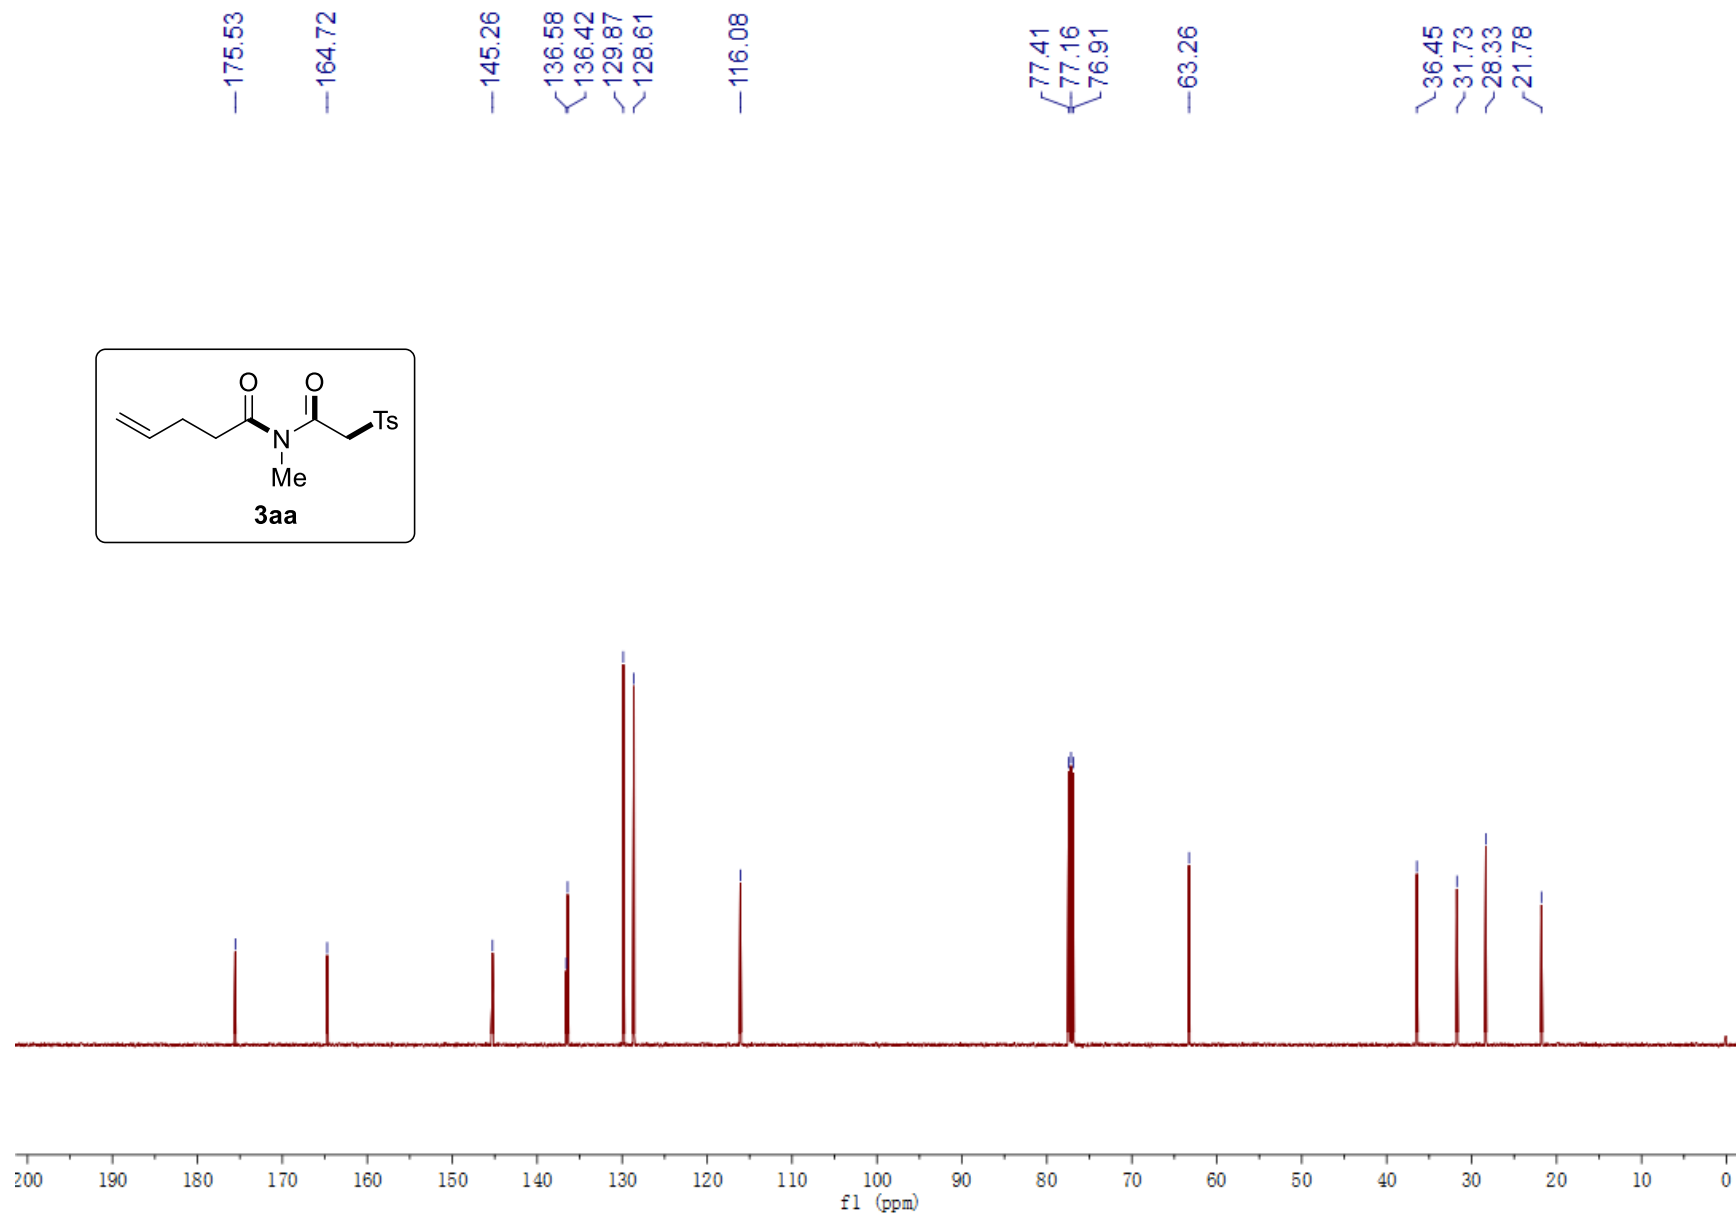

S112



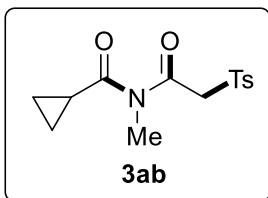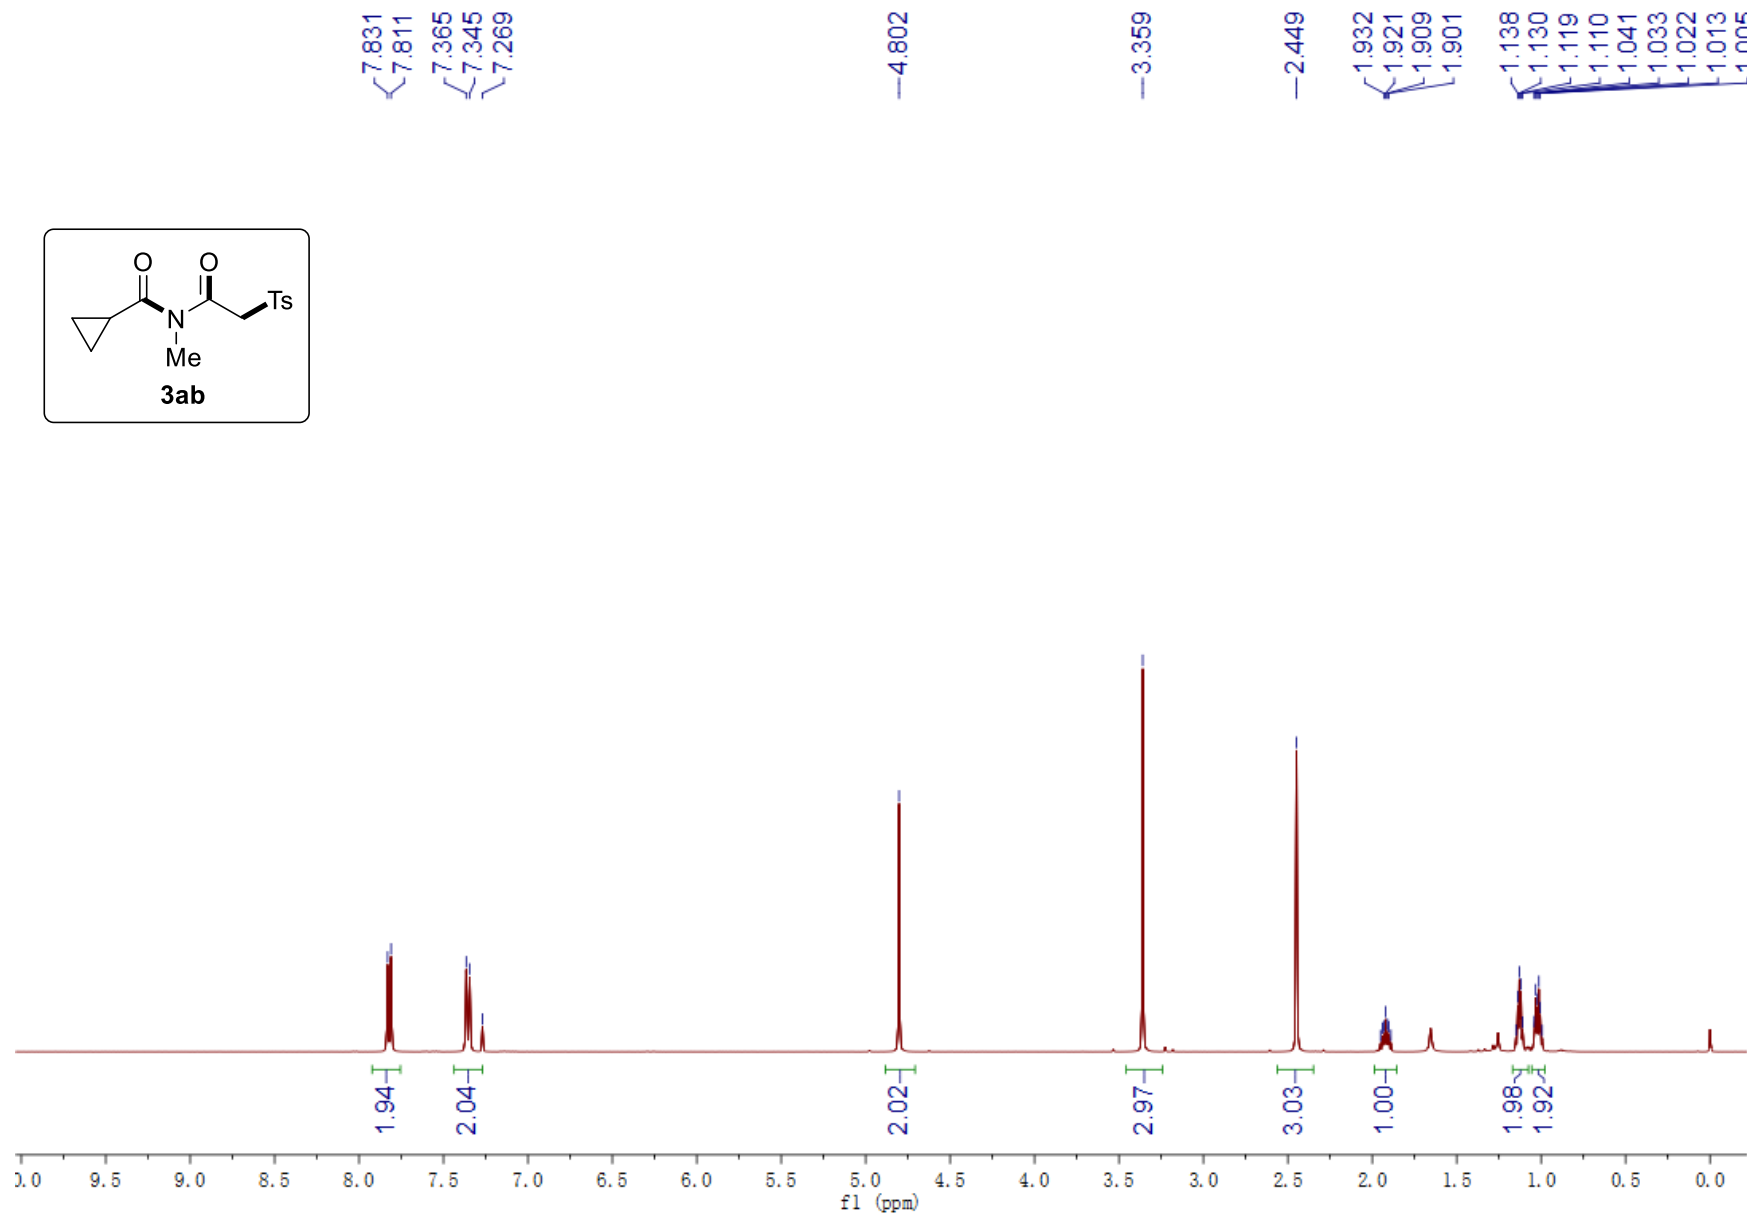

S113

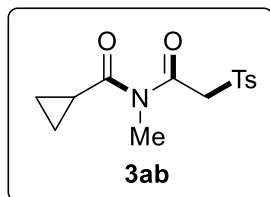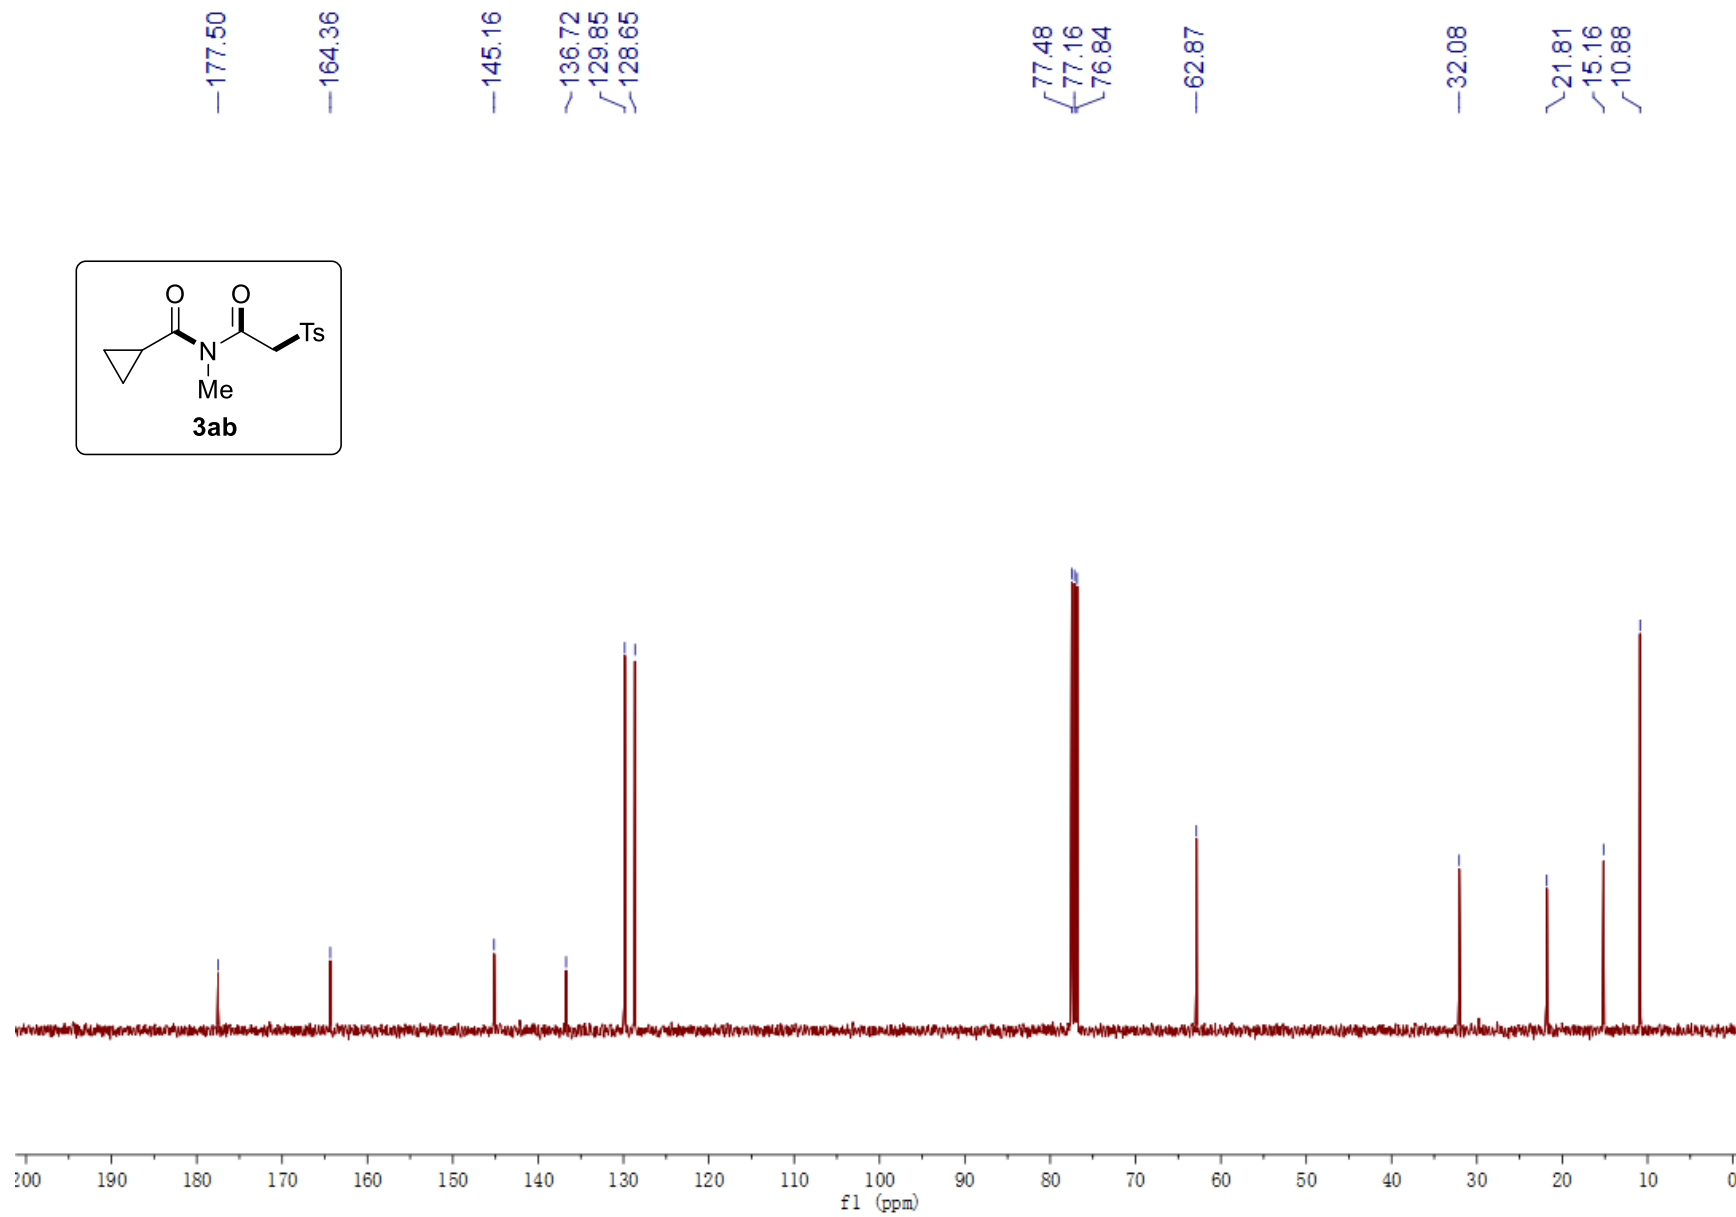

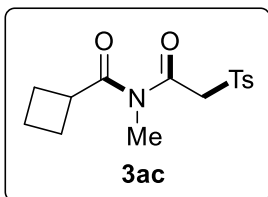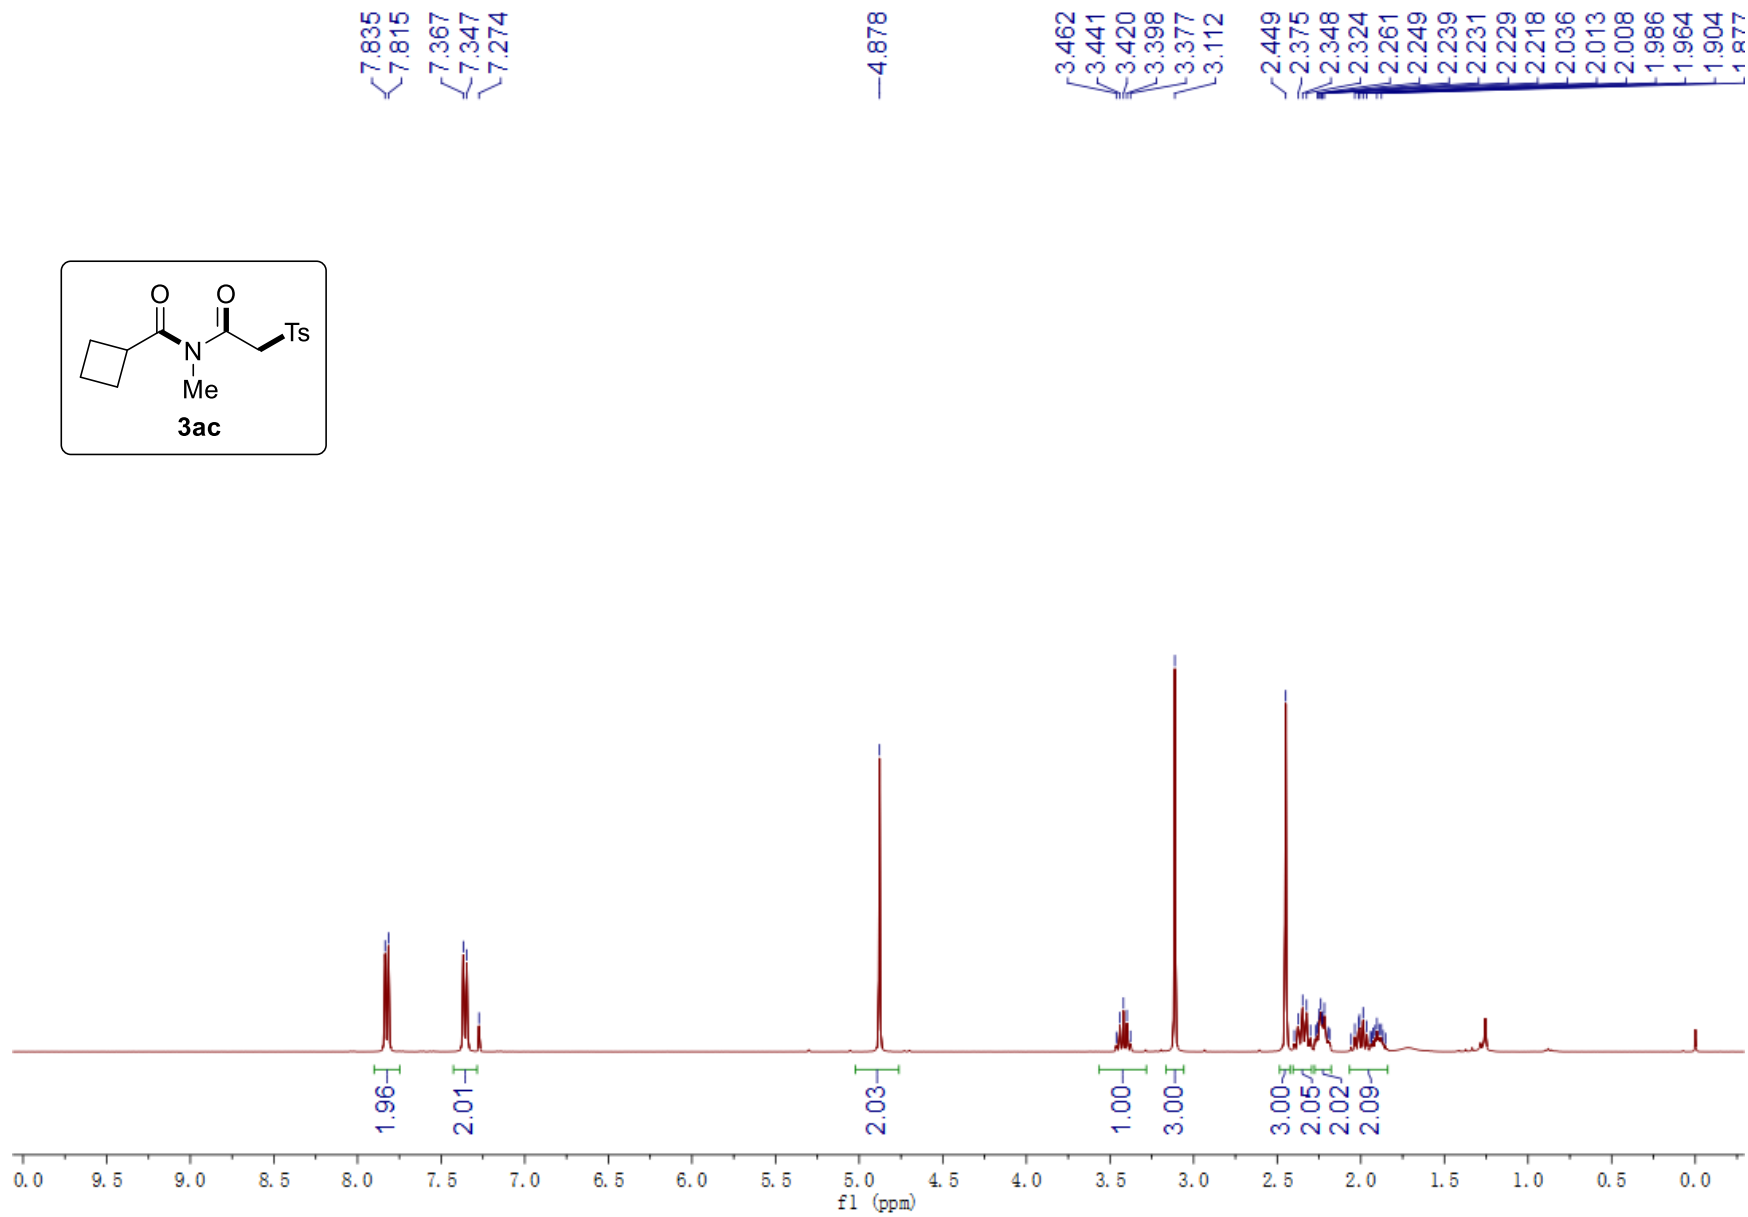

S115

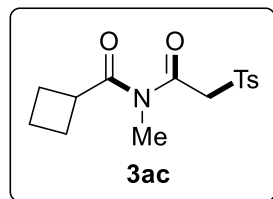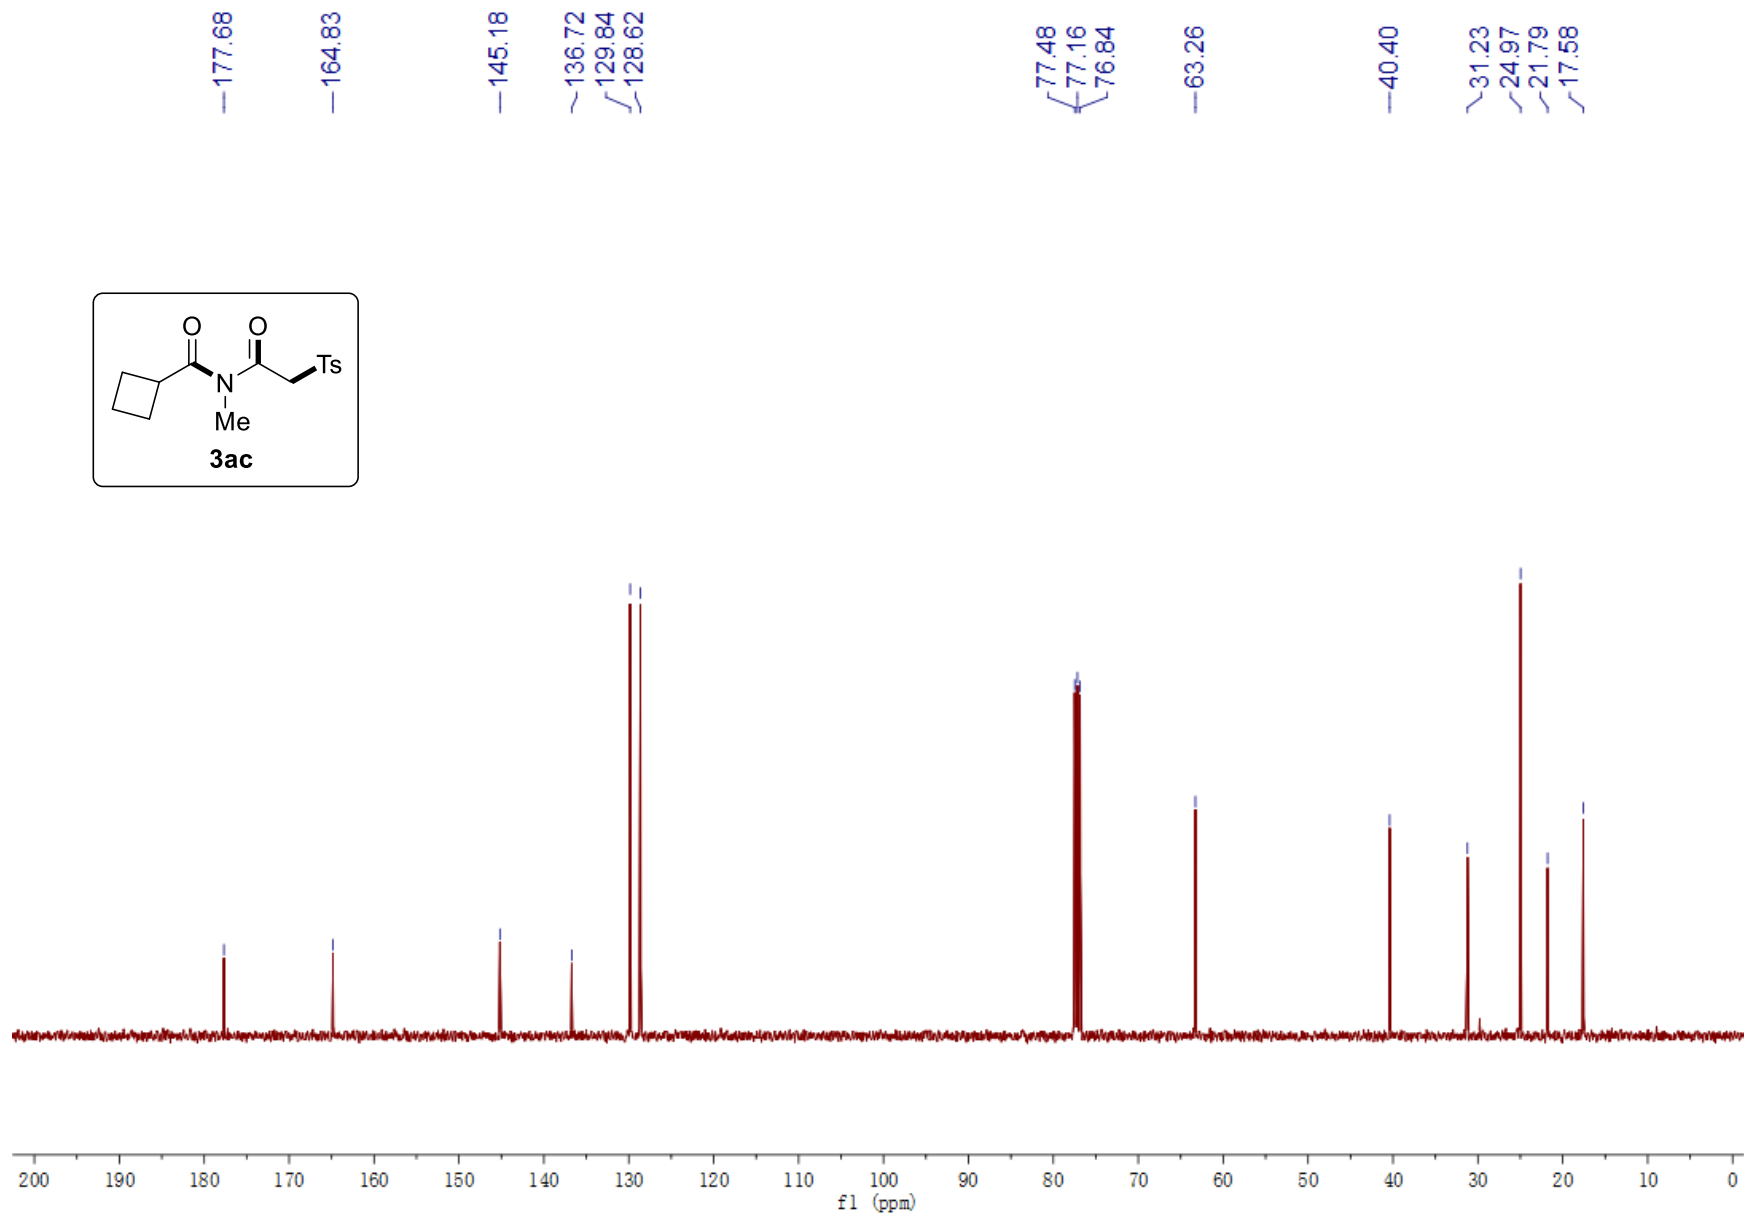

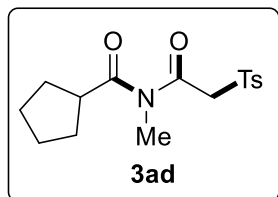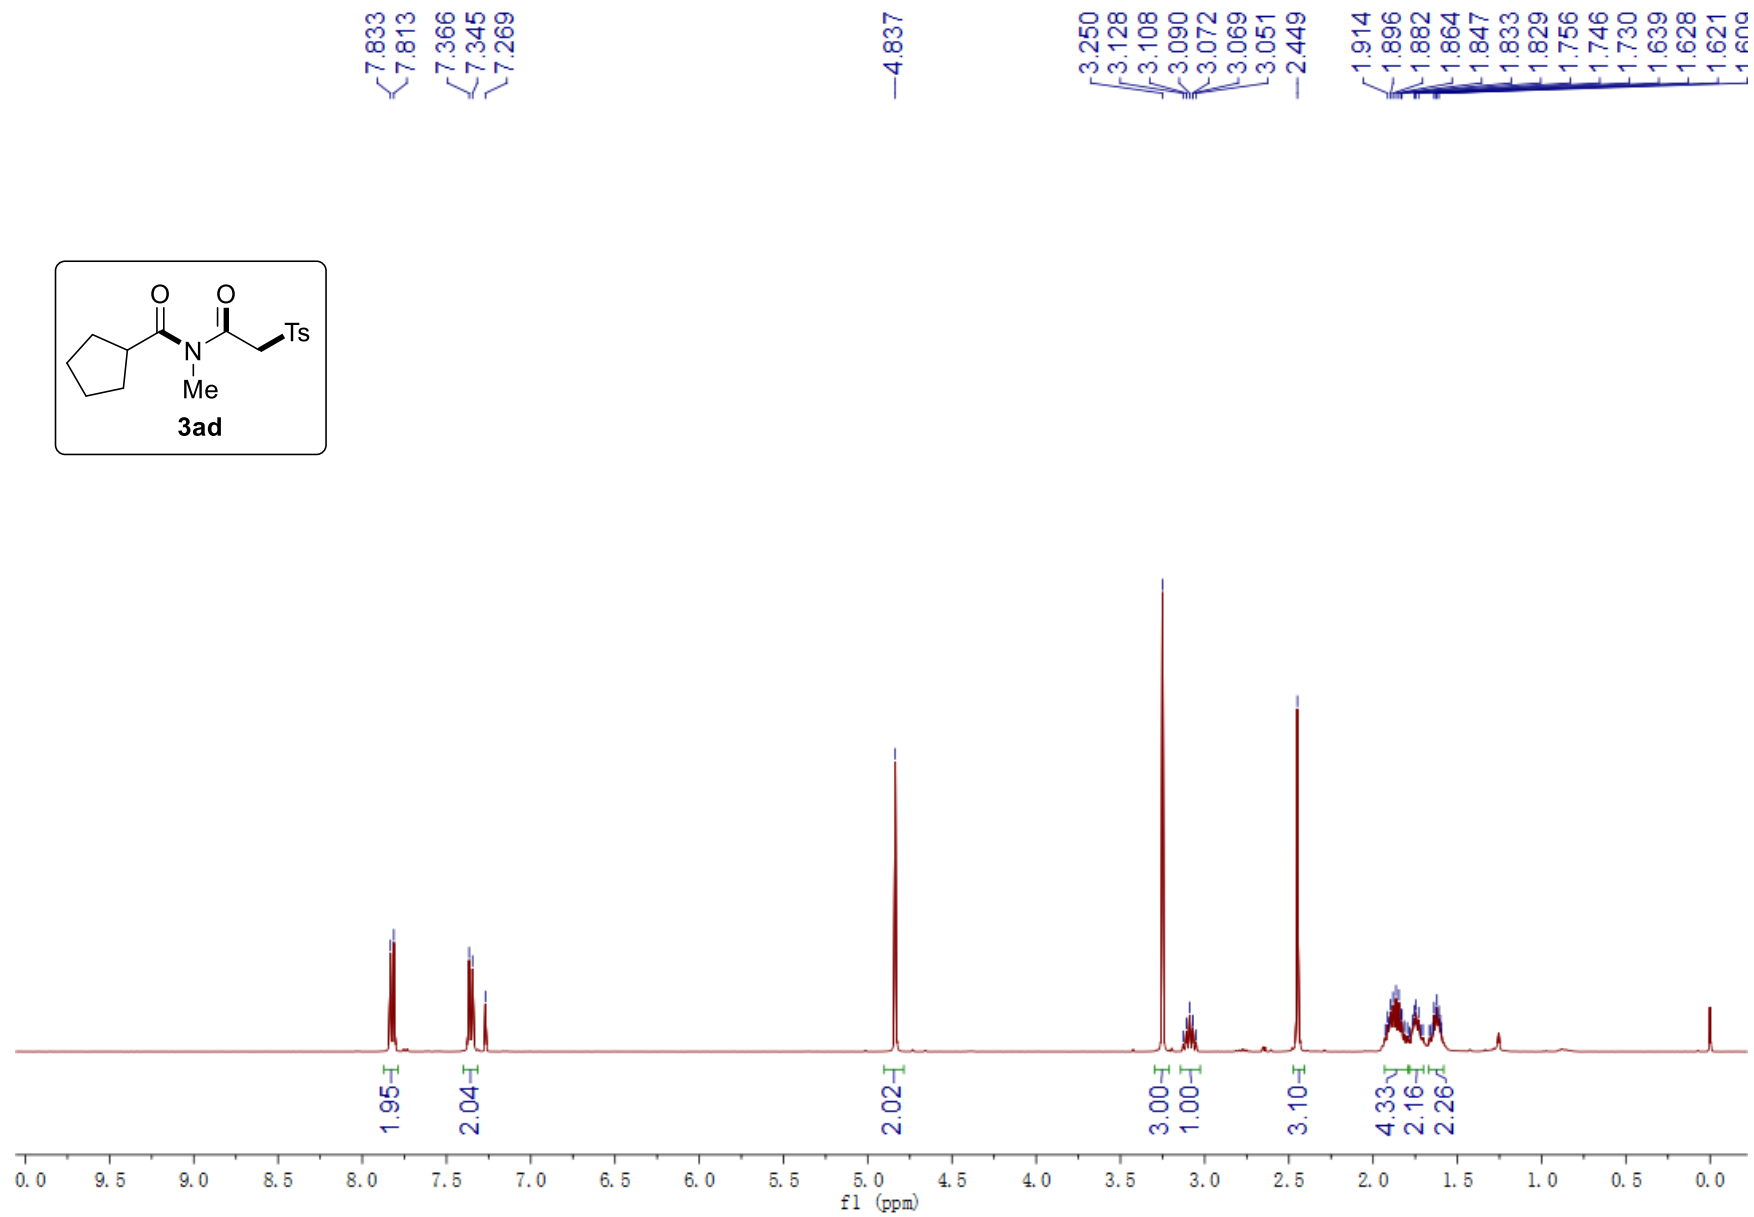

S117

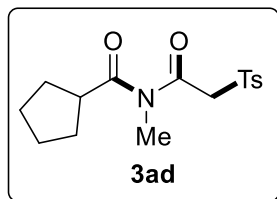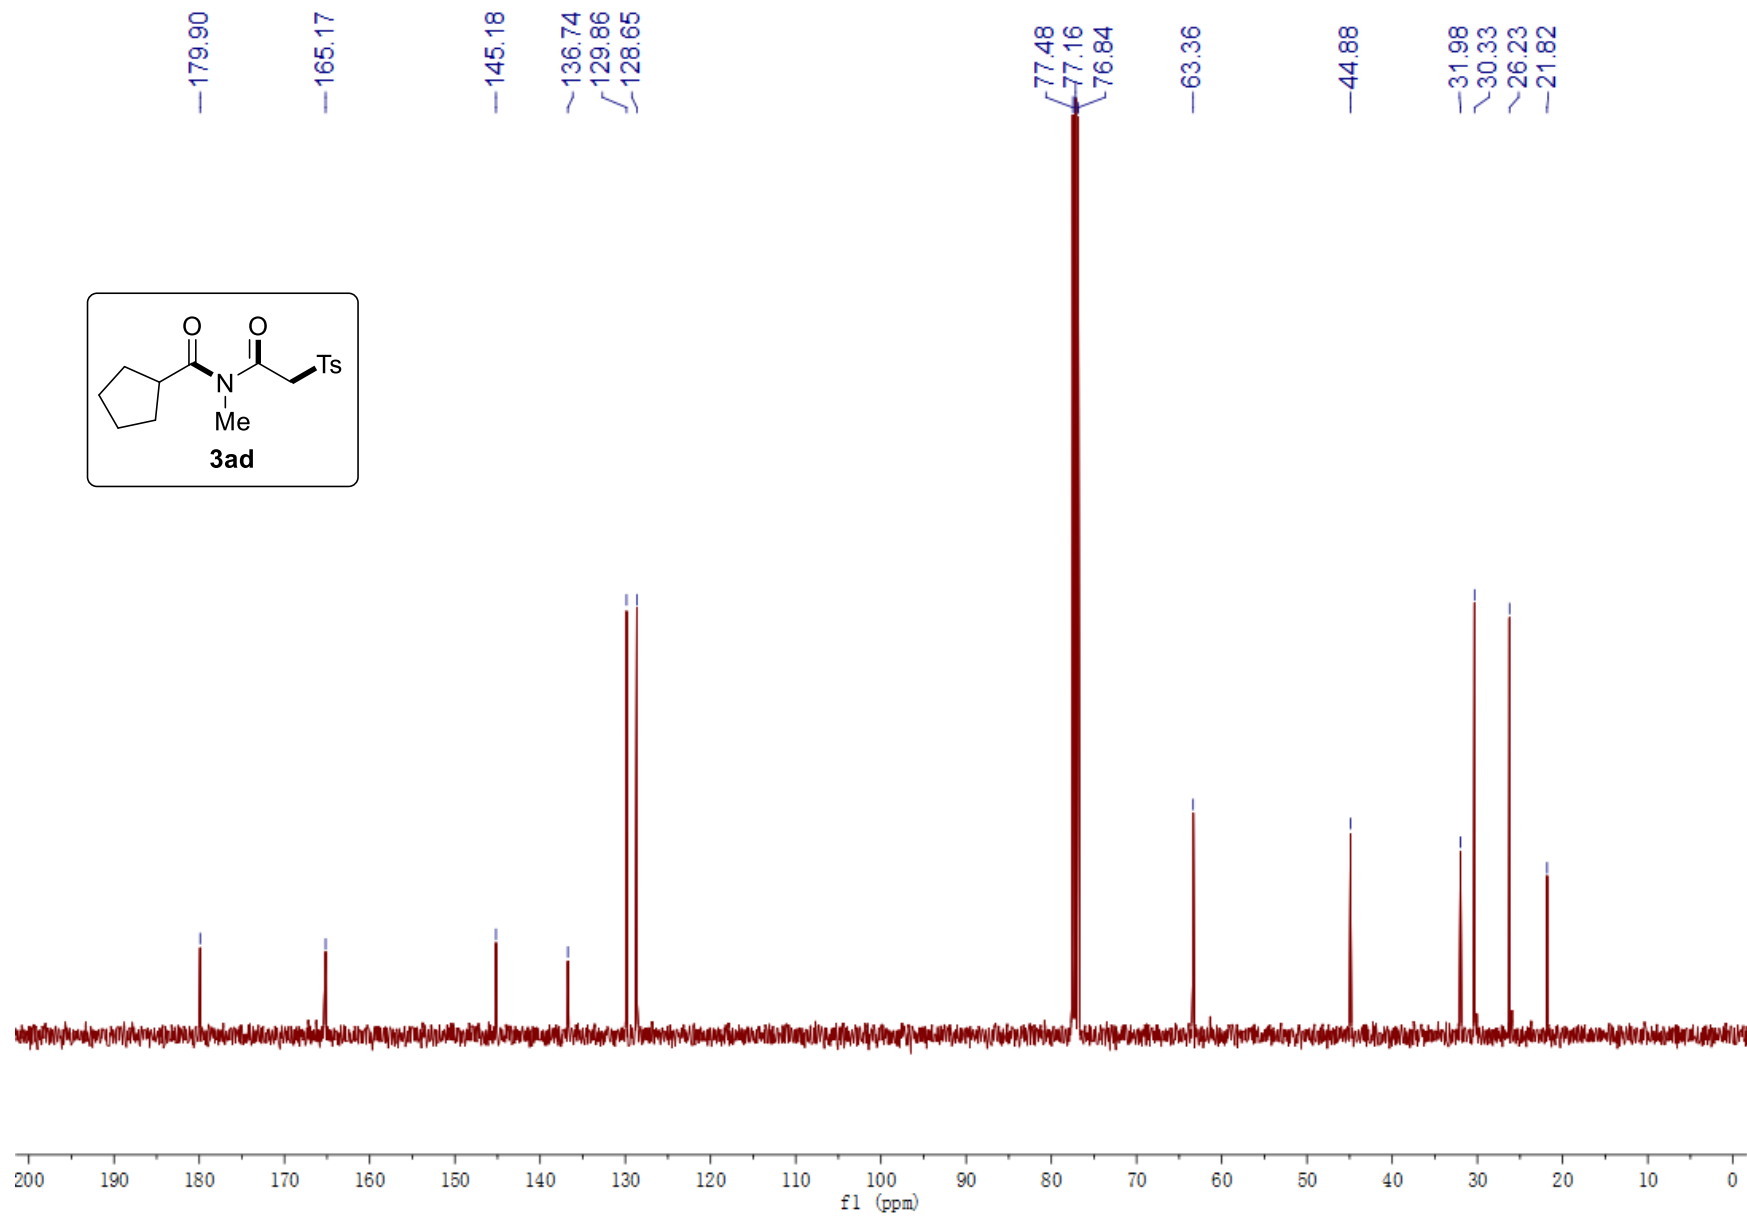

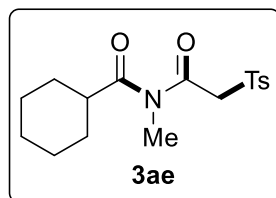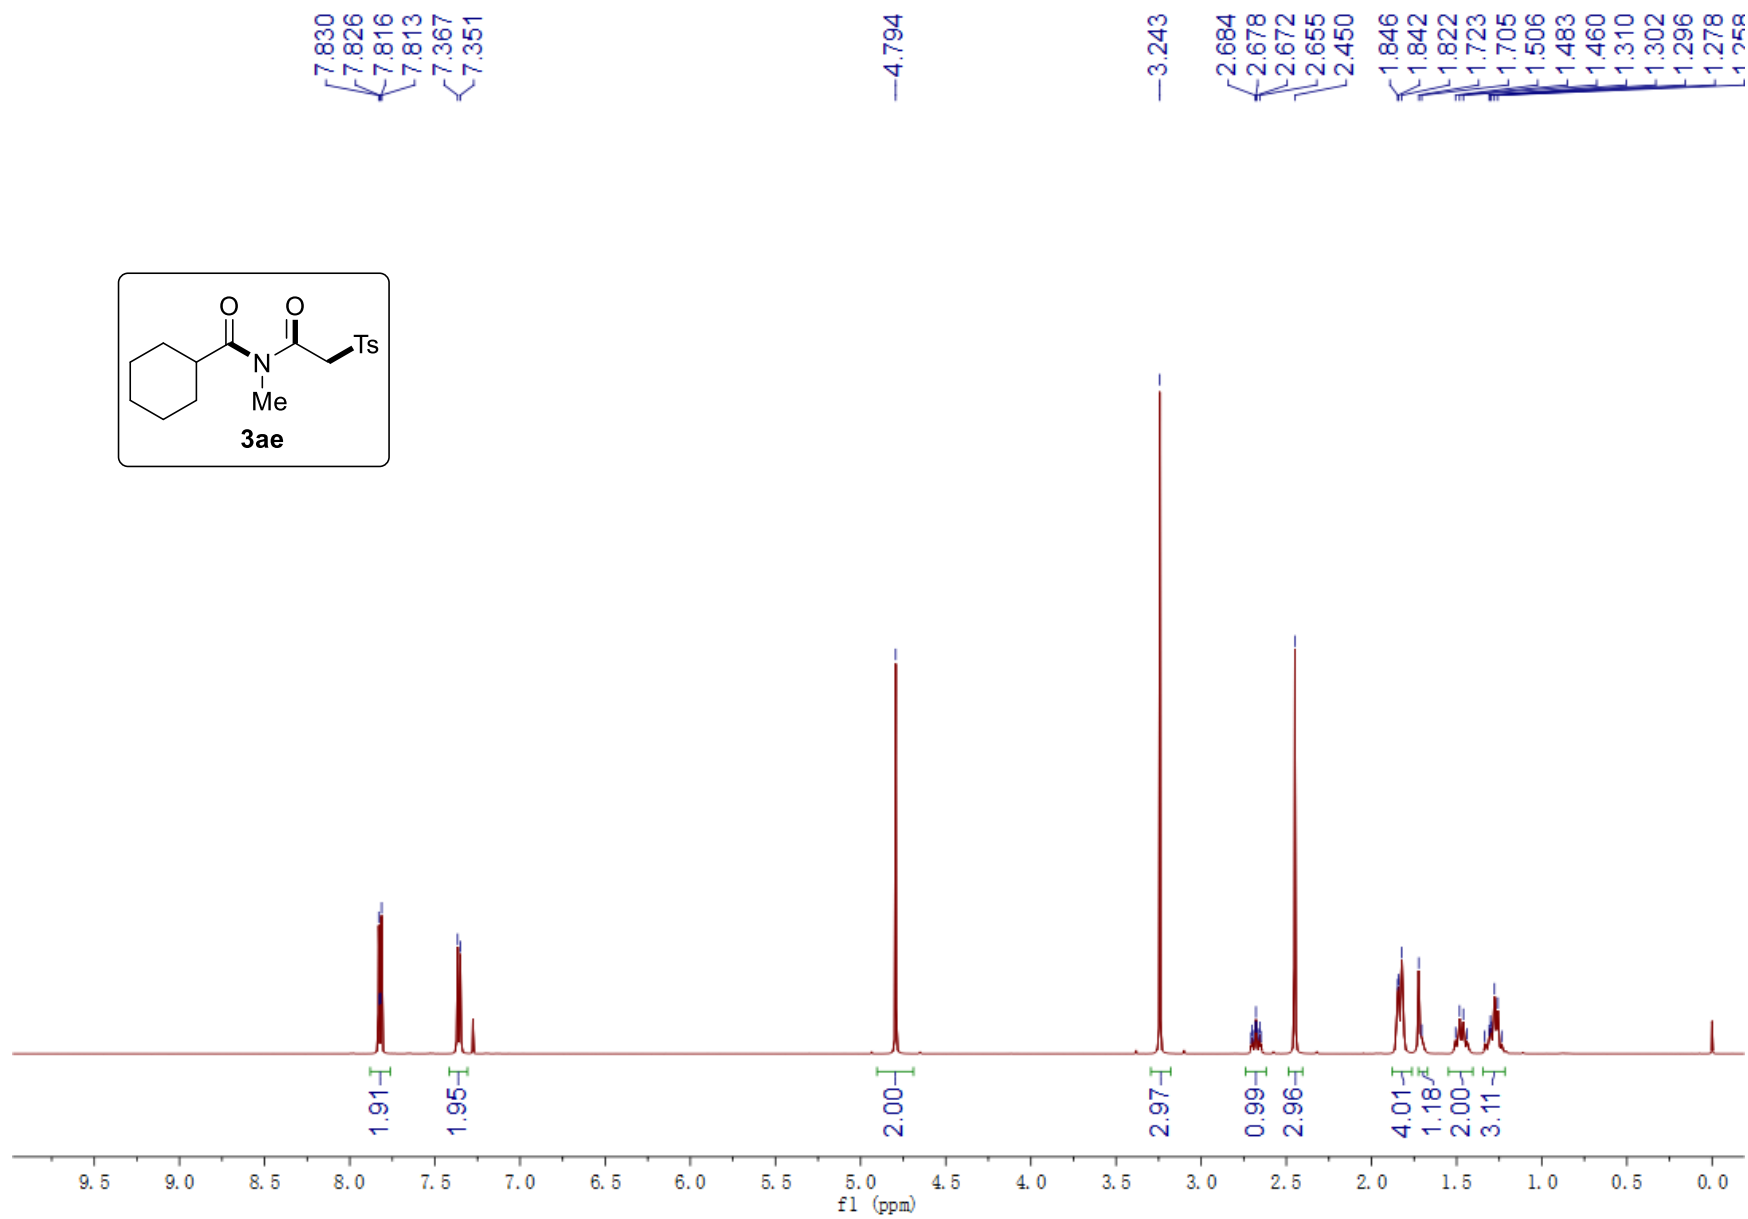

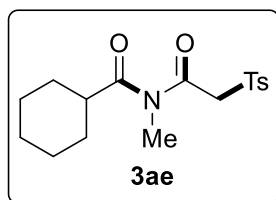

—179.67

—165.16

—145.18

~136.62

~129.84

~128.60

~77.41

~77.16

~76.91

—63.23

—44.33

~31.87

~29.19

~25.68

~25.57

~21.78

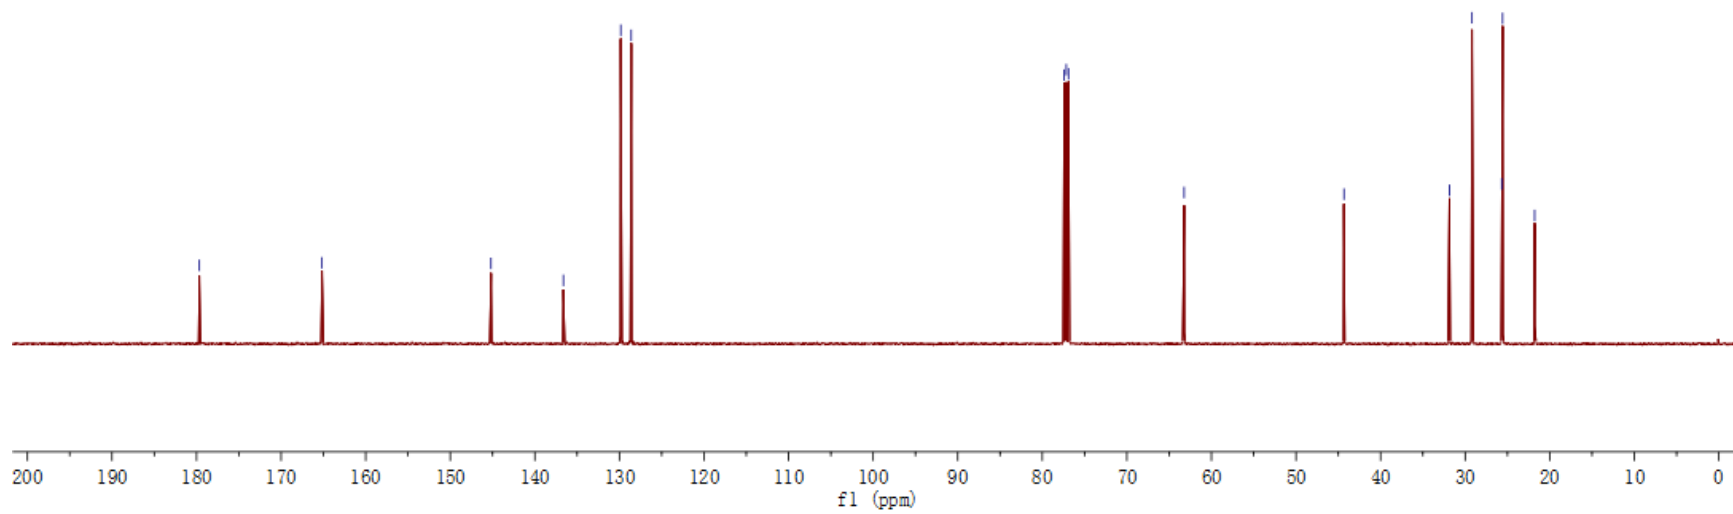

**S120**



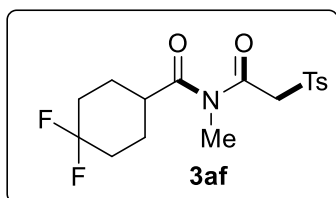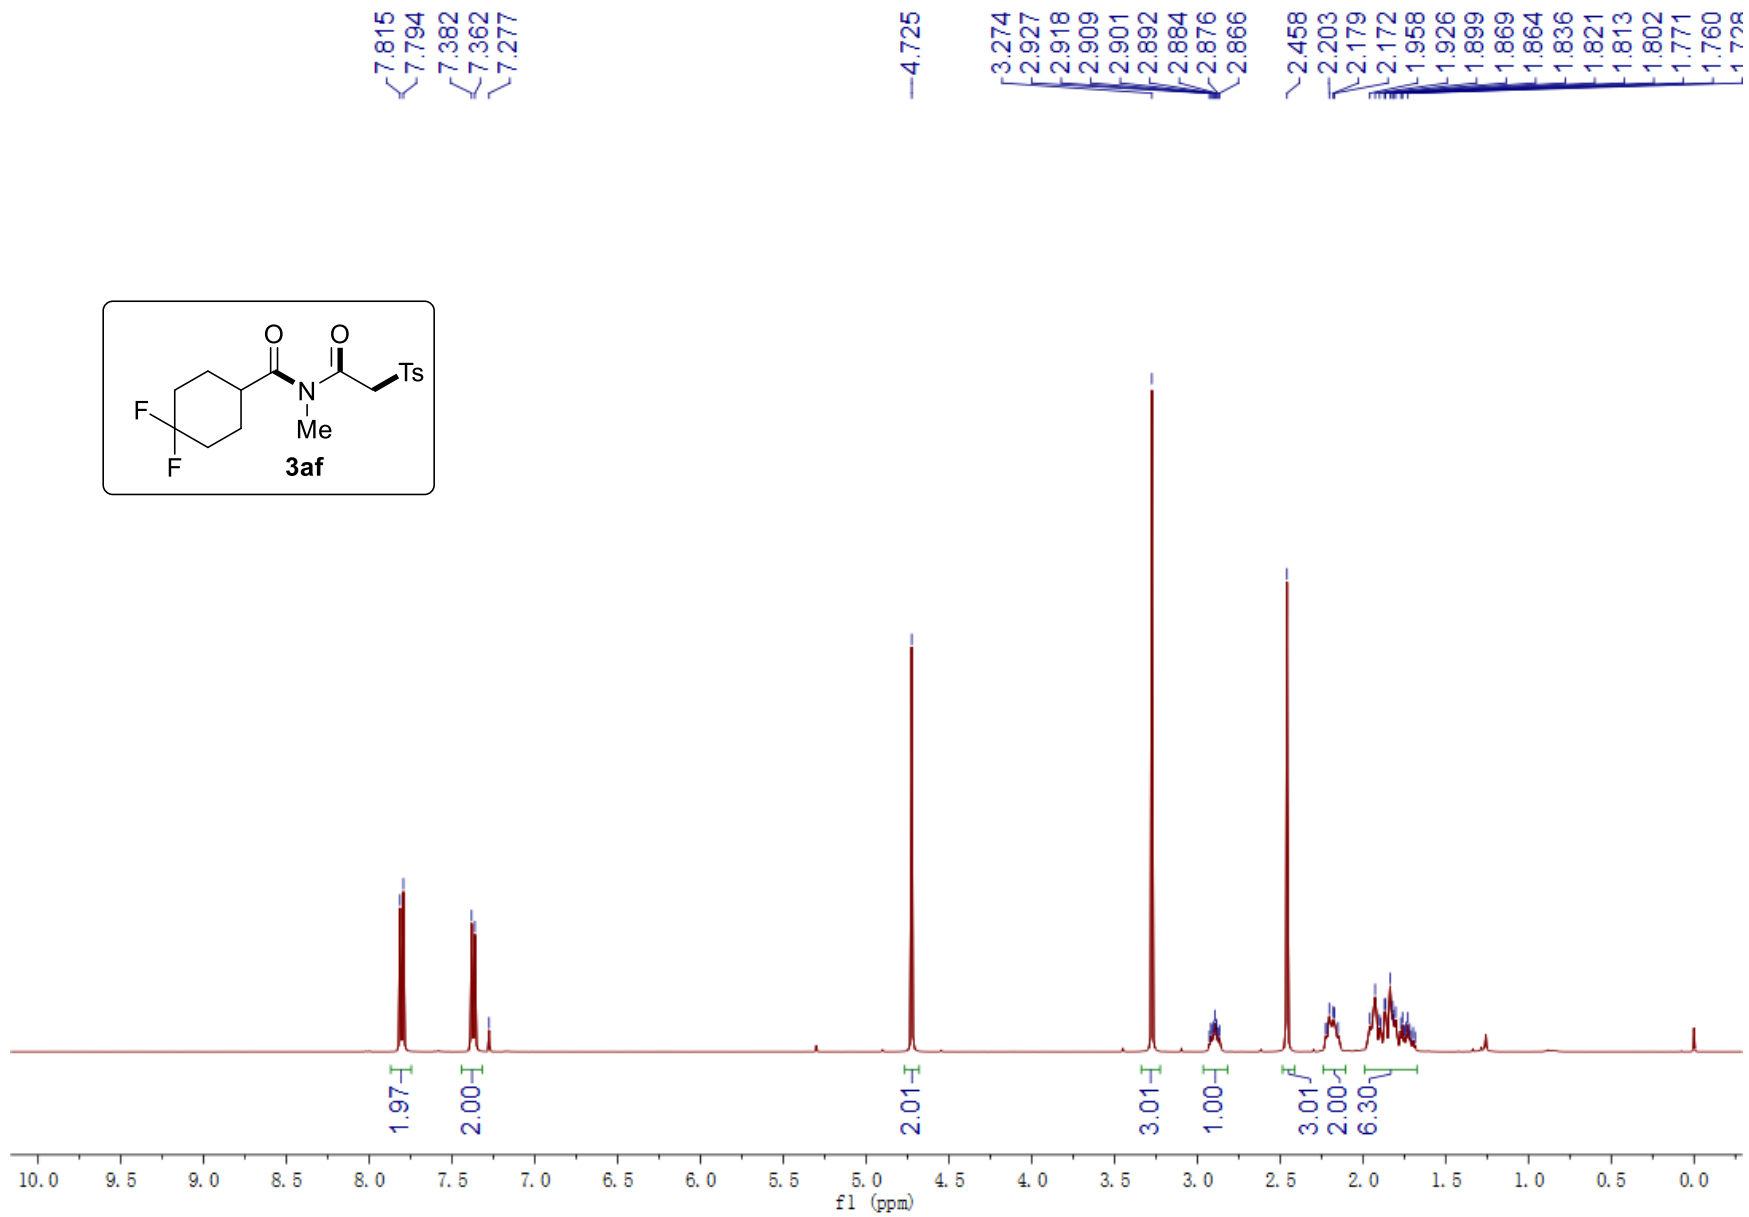

S121

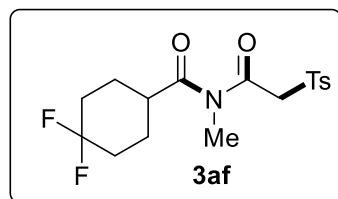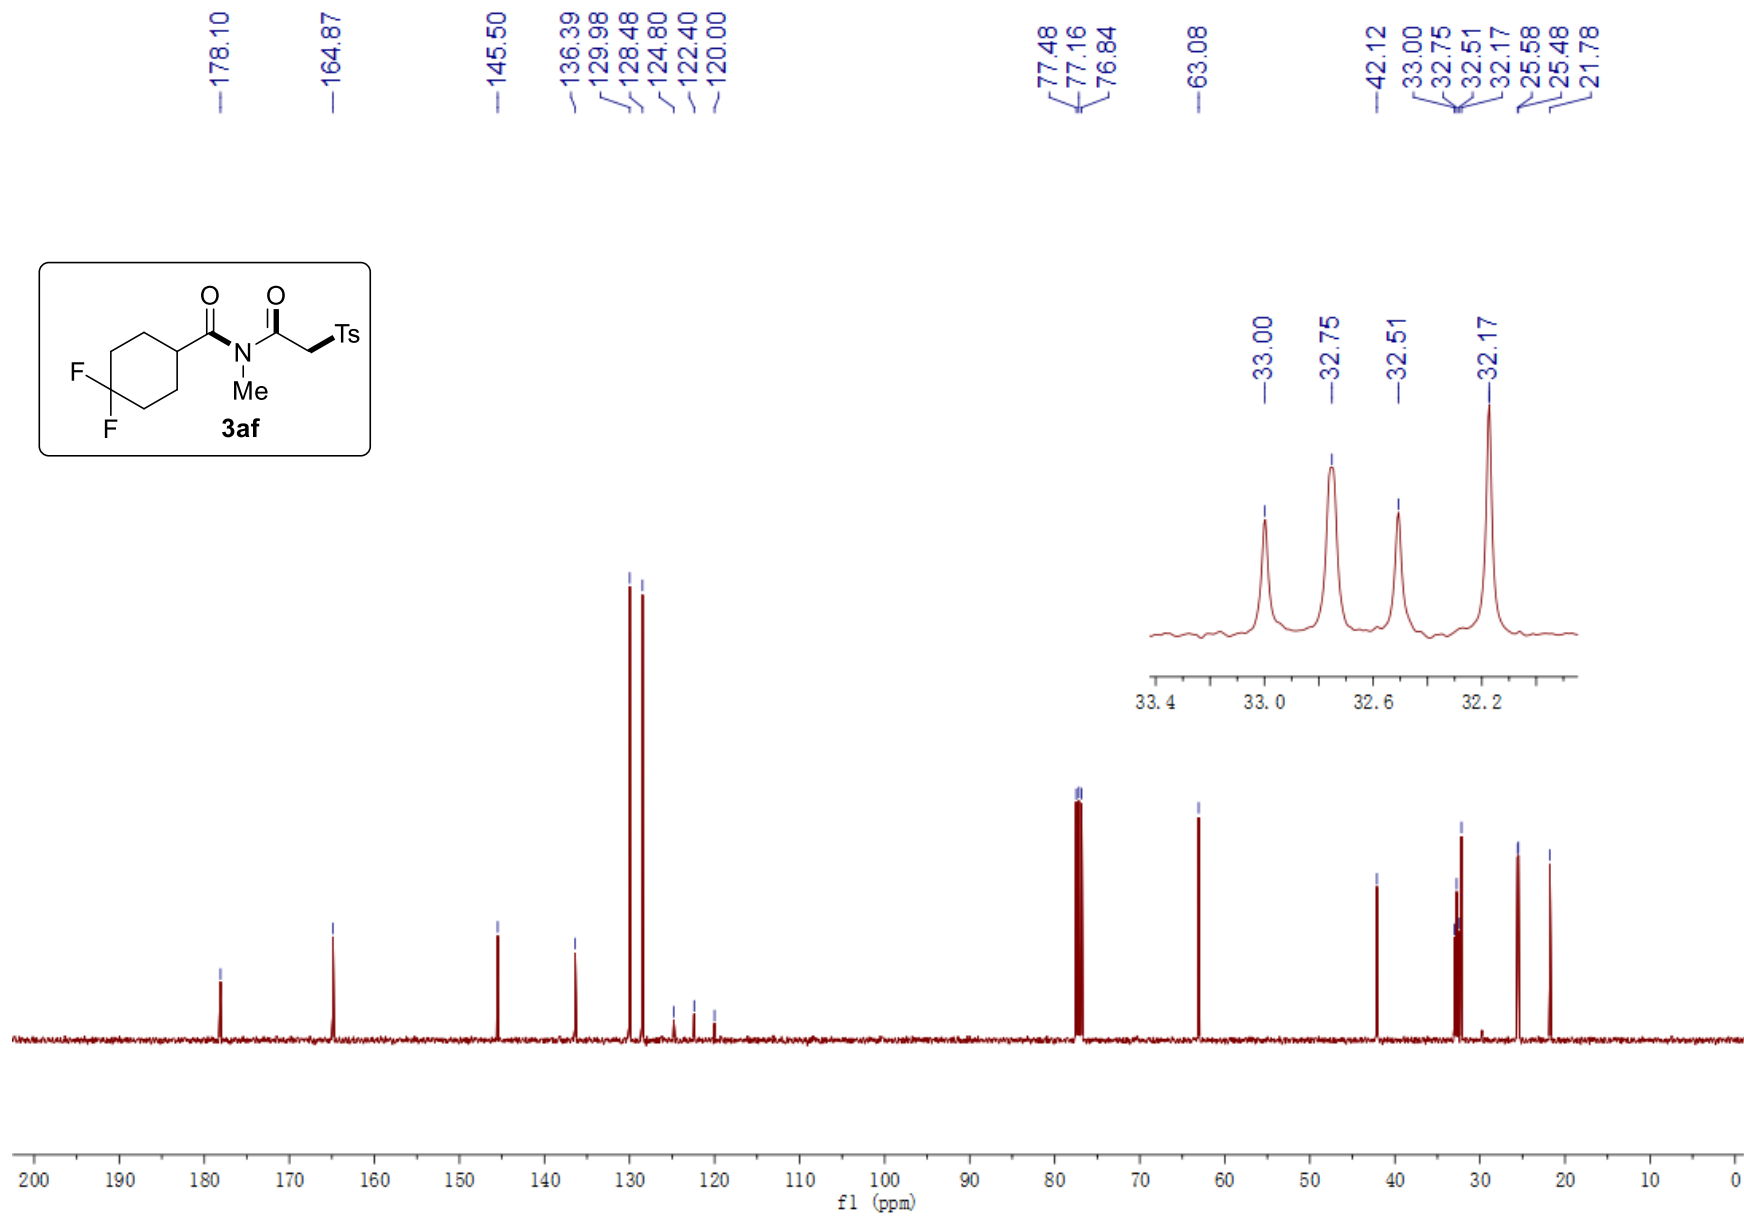

S122

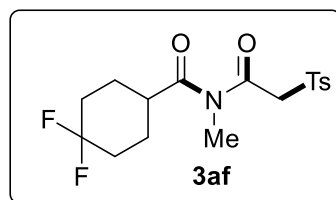

92.97  
93.60  
101.13  
101.76

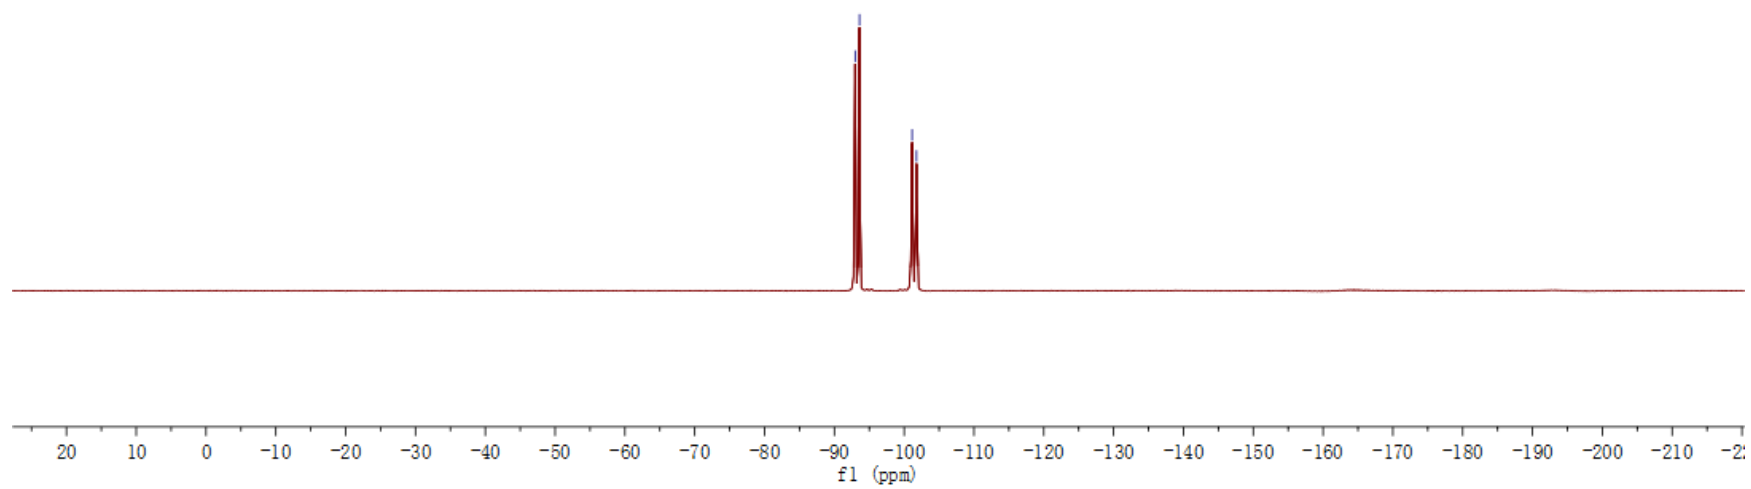

S123

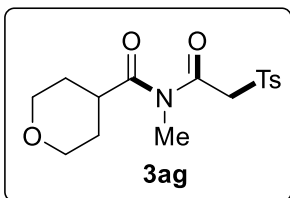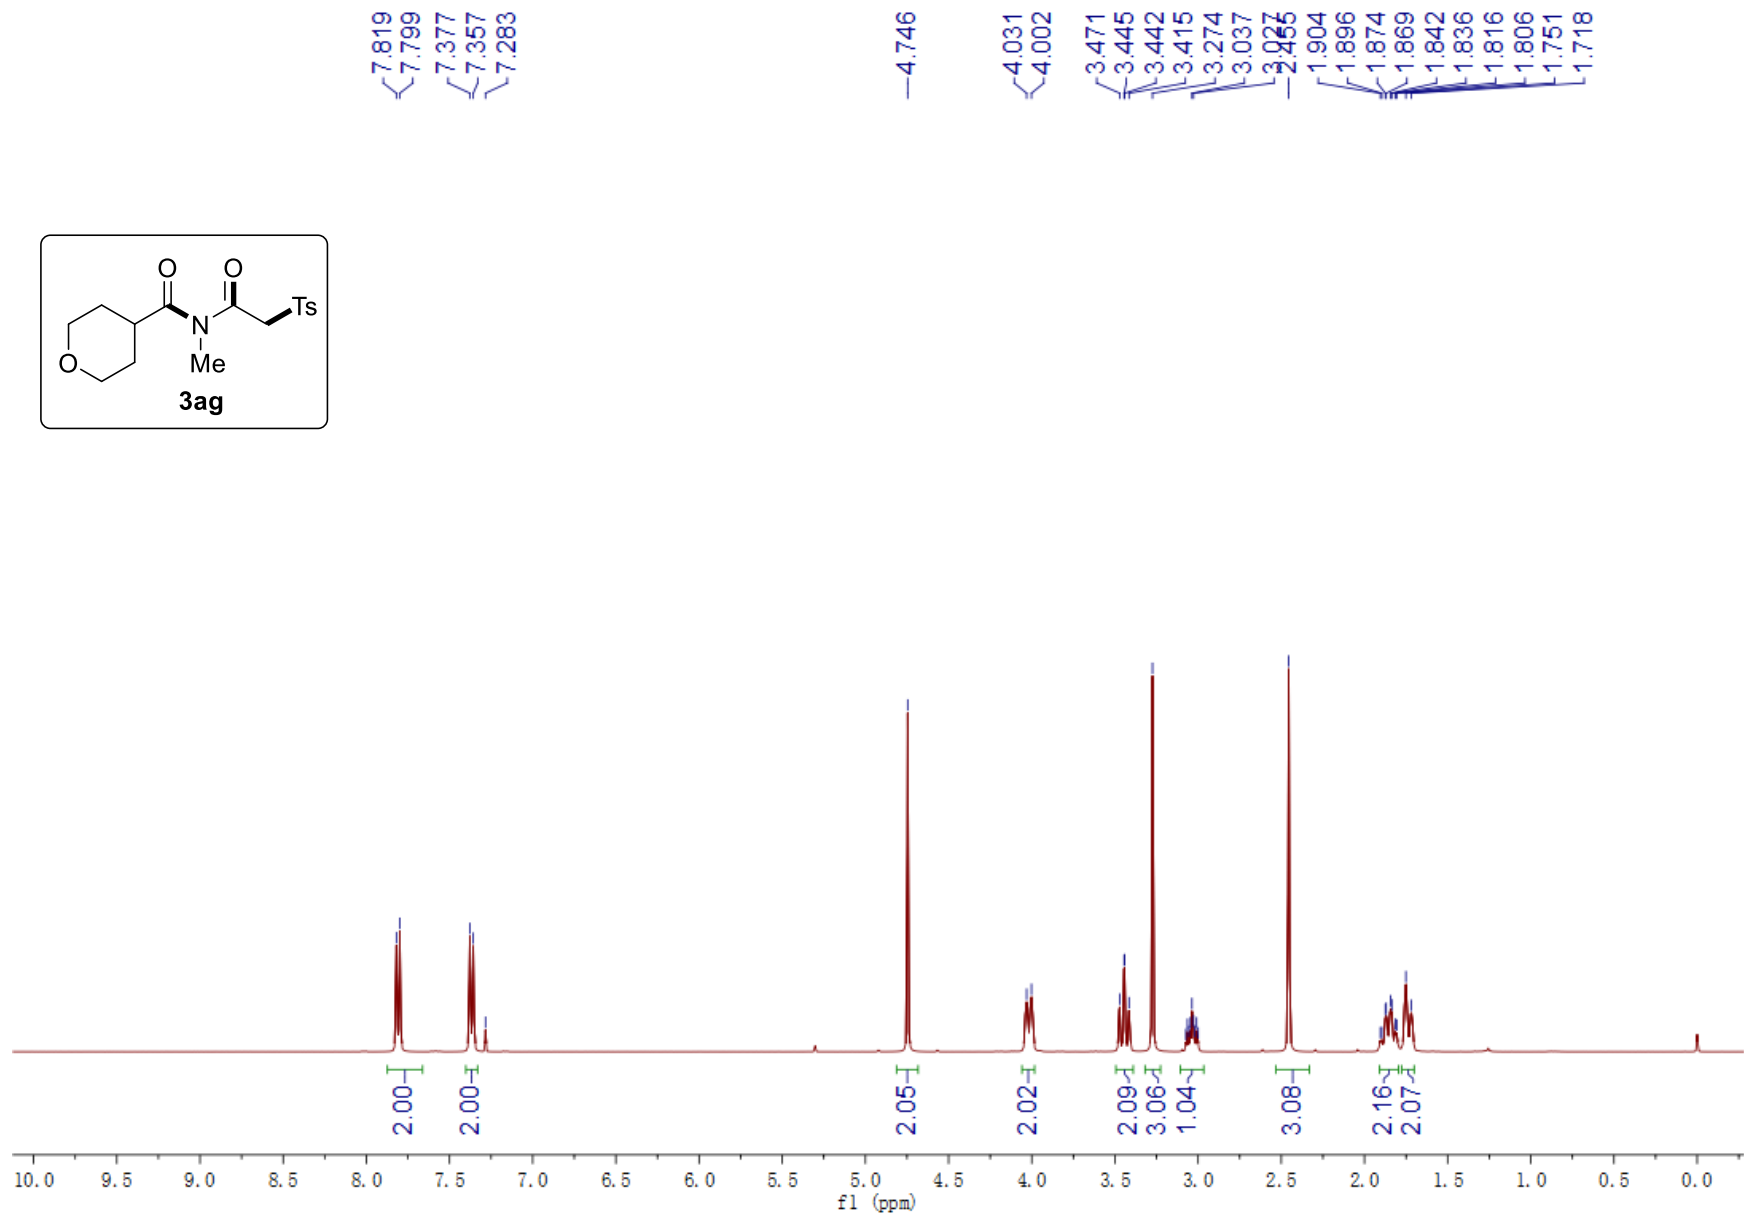

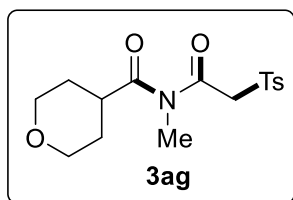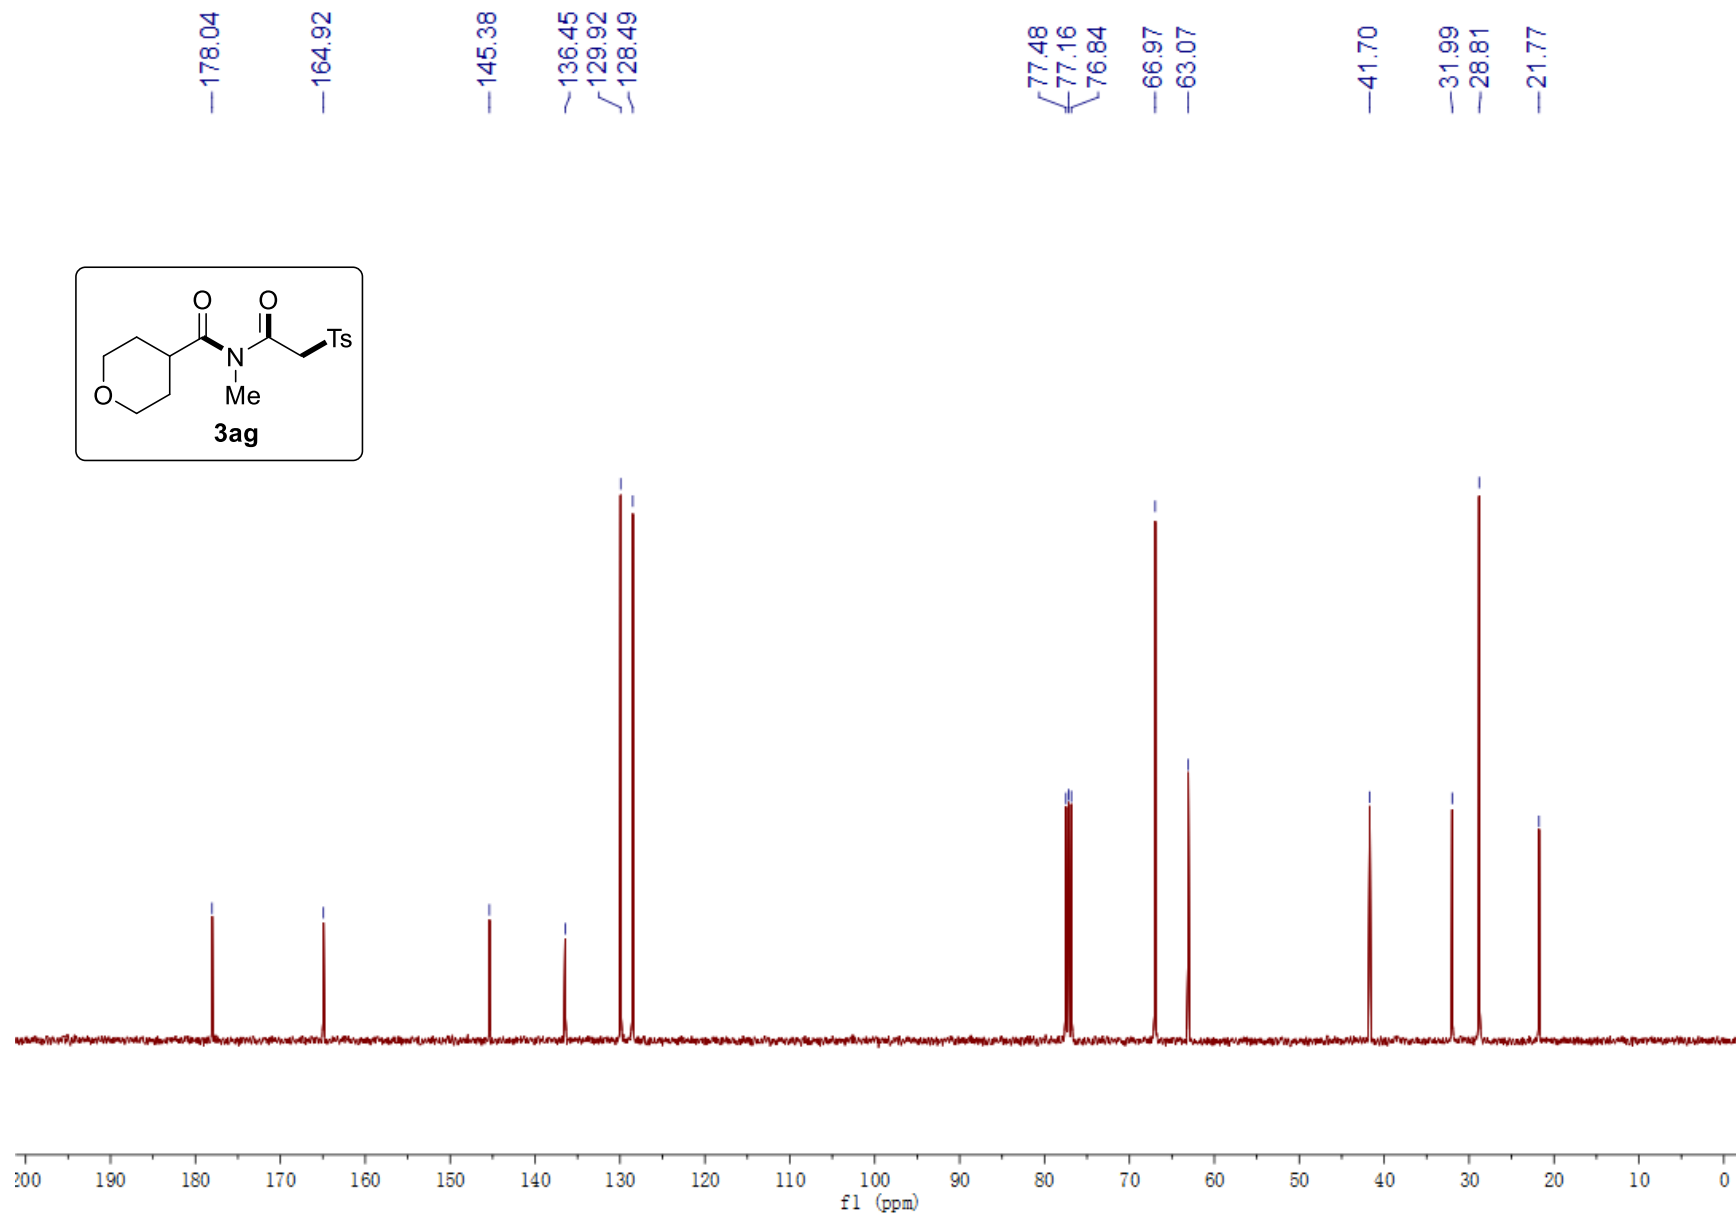

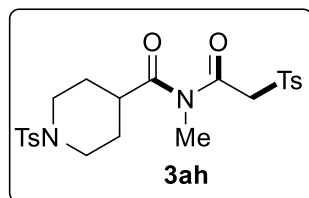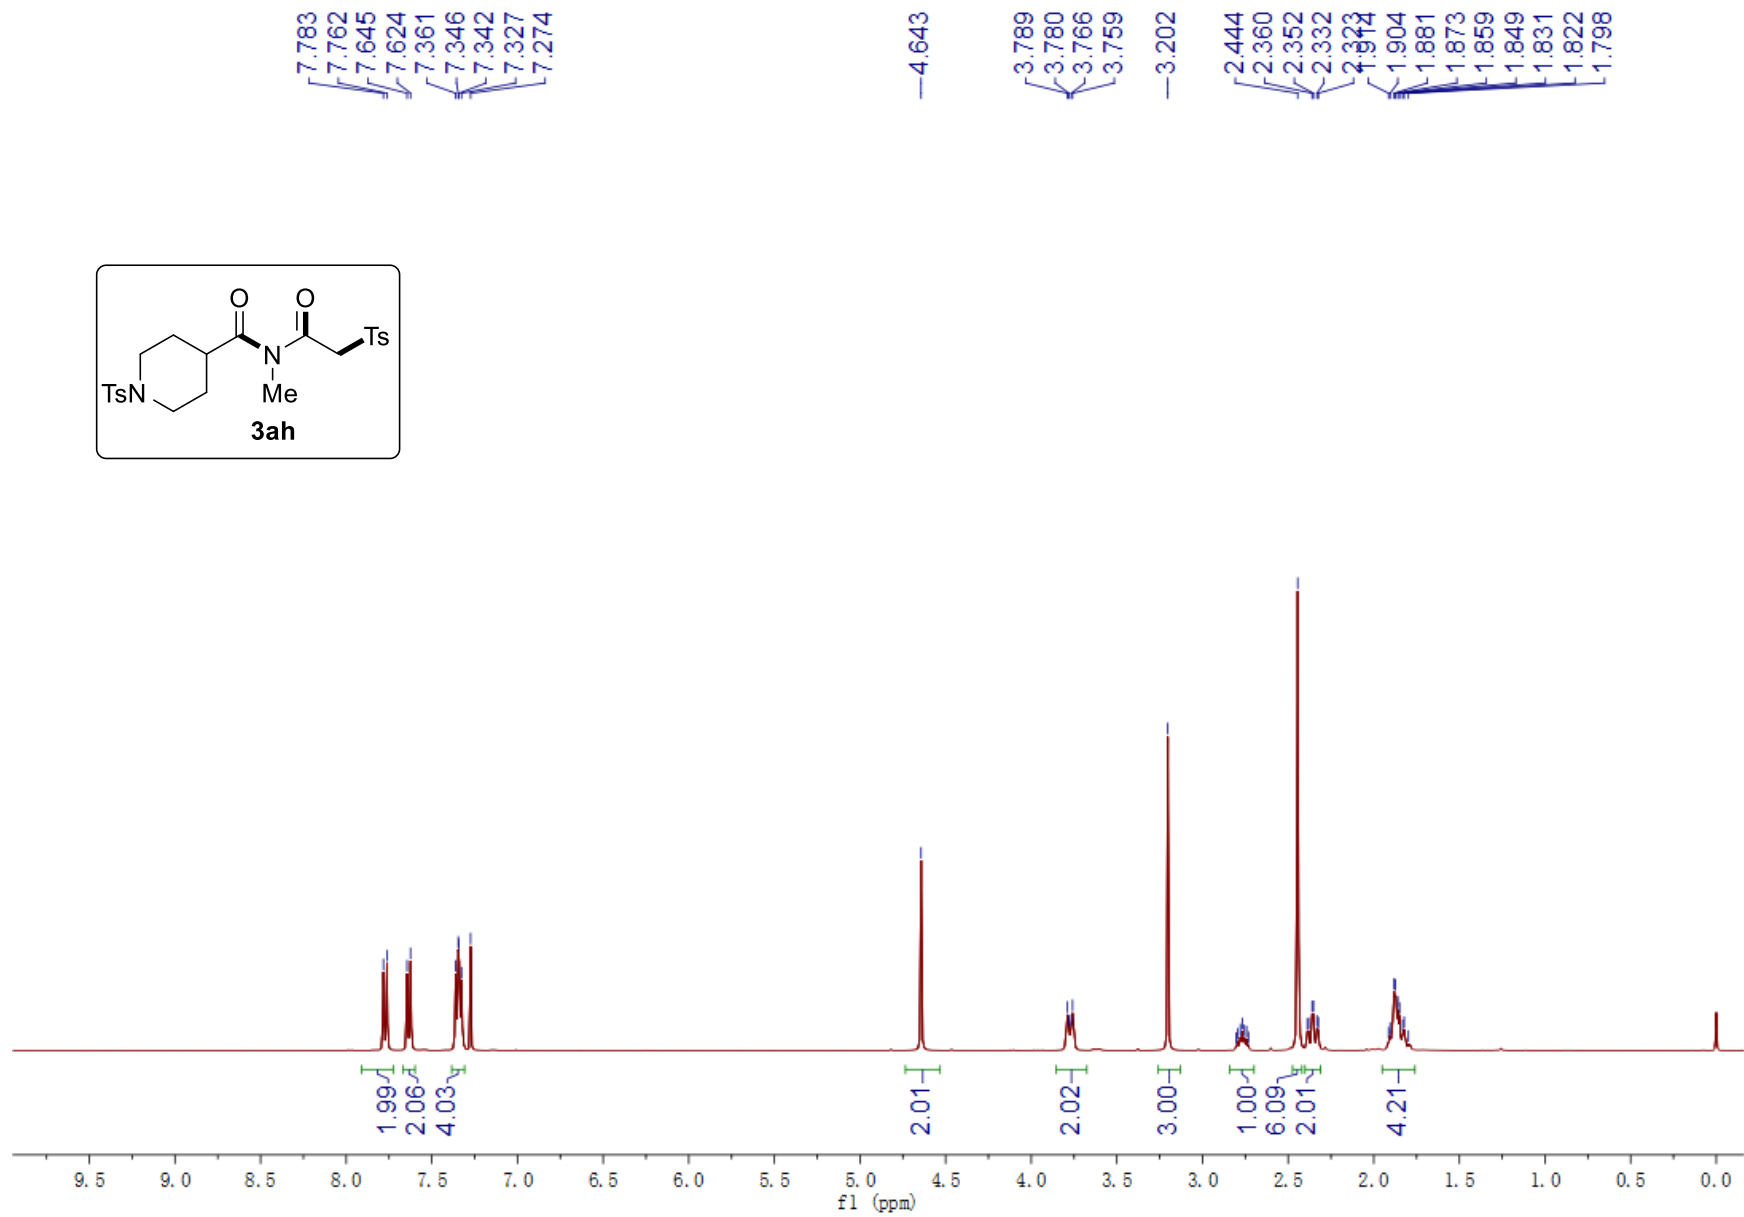

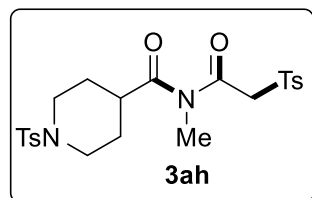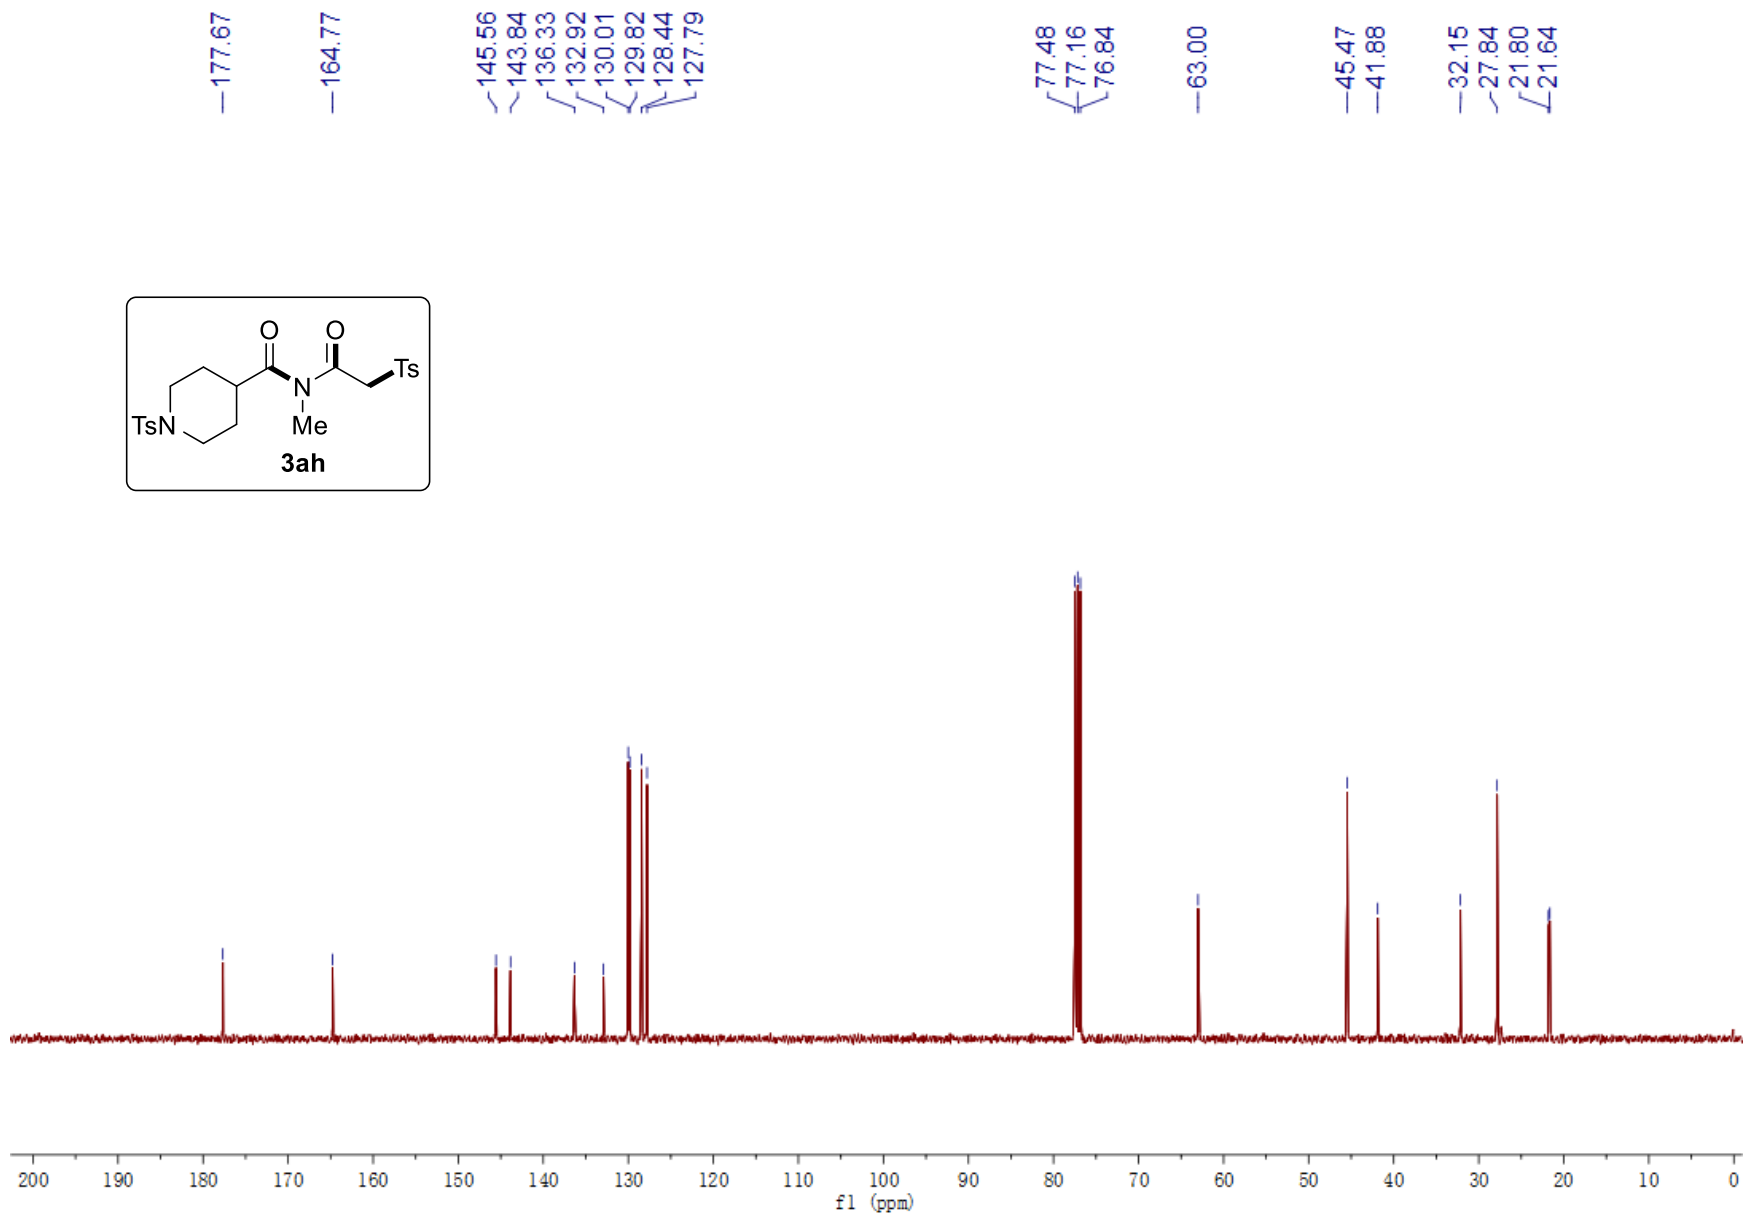

S127

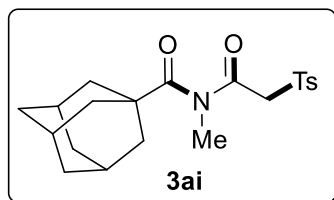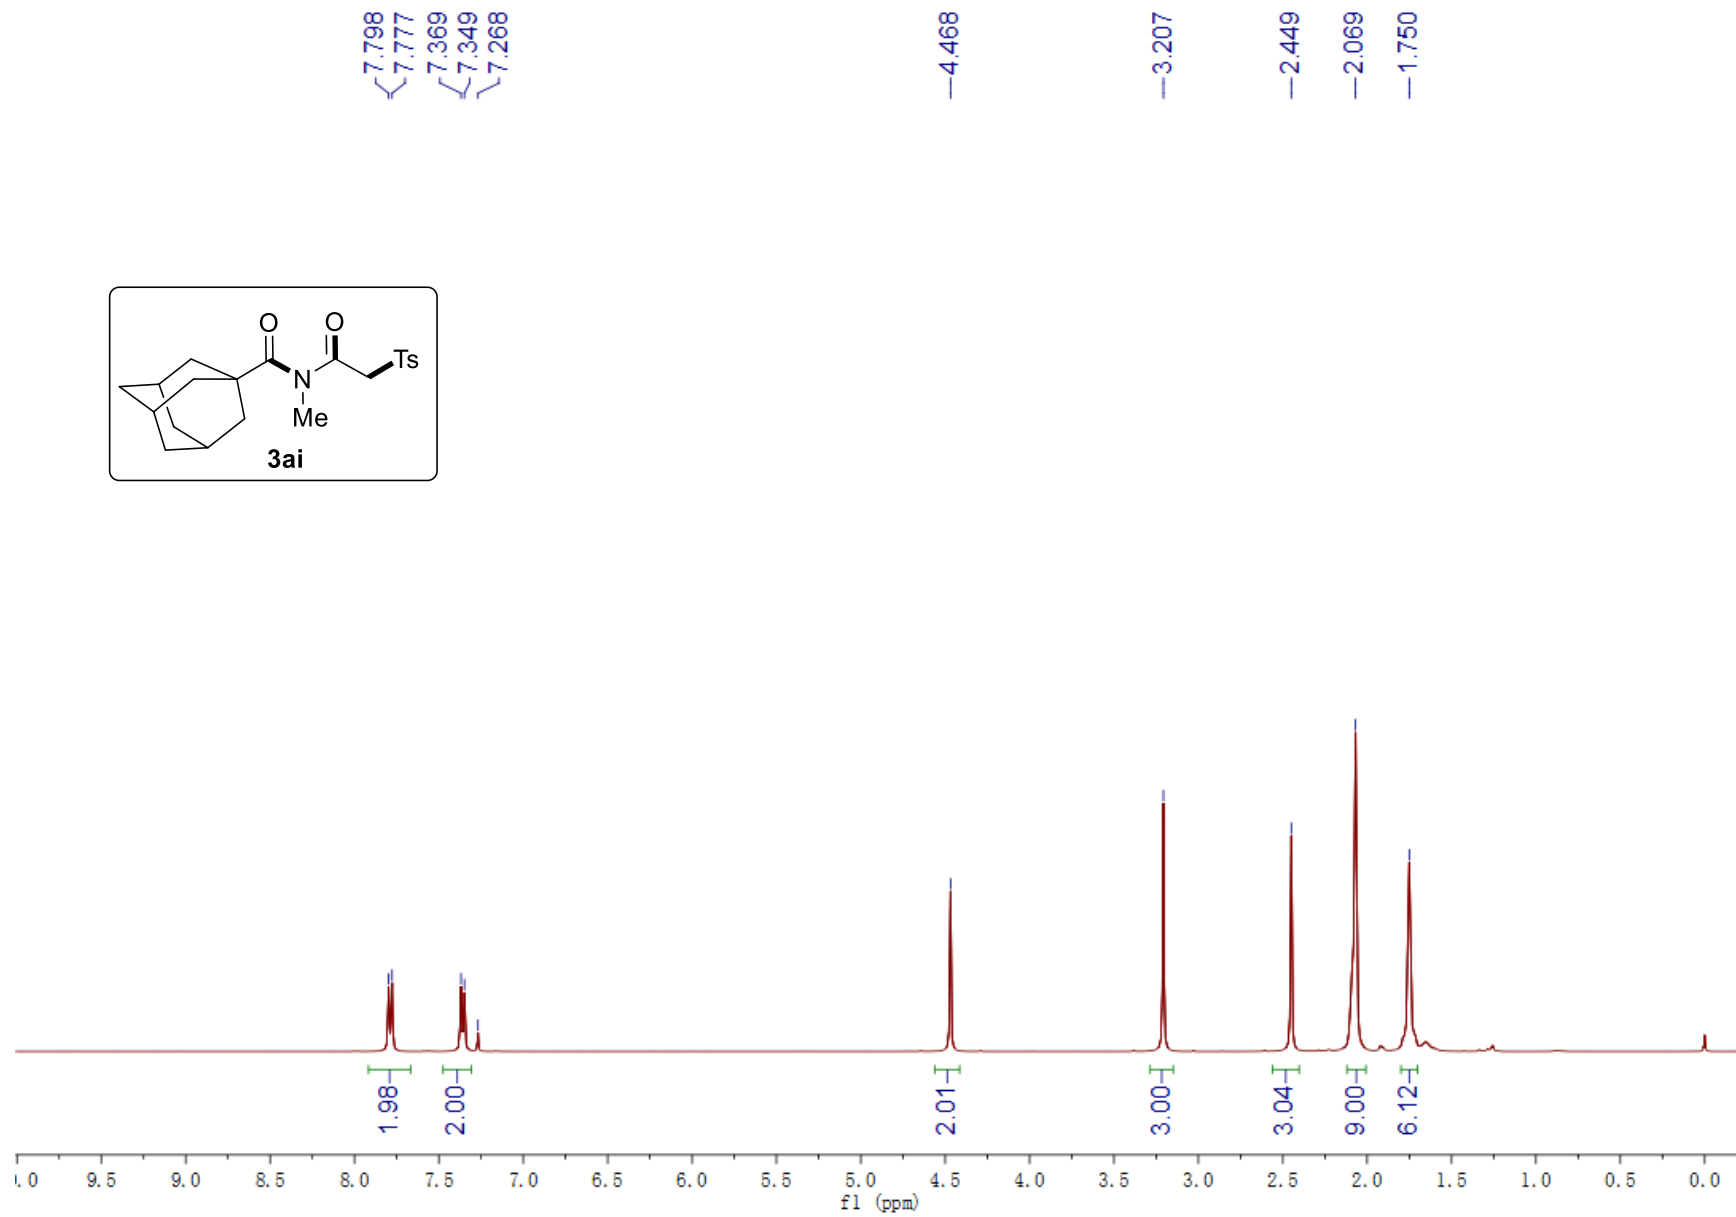



—185.48

—164.47

—145.31

~136.26

~129.92

~128.59

~77.48

~77.16

~76.84

—61.44

~45.29

~38.97

~36.35

~33.16

~28.17

~21.83

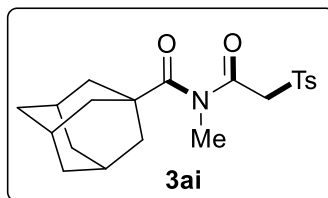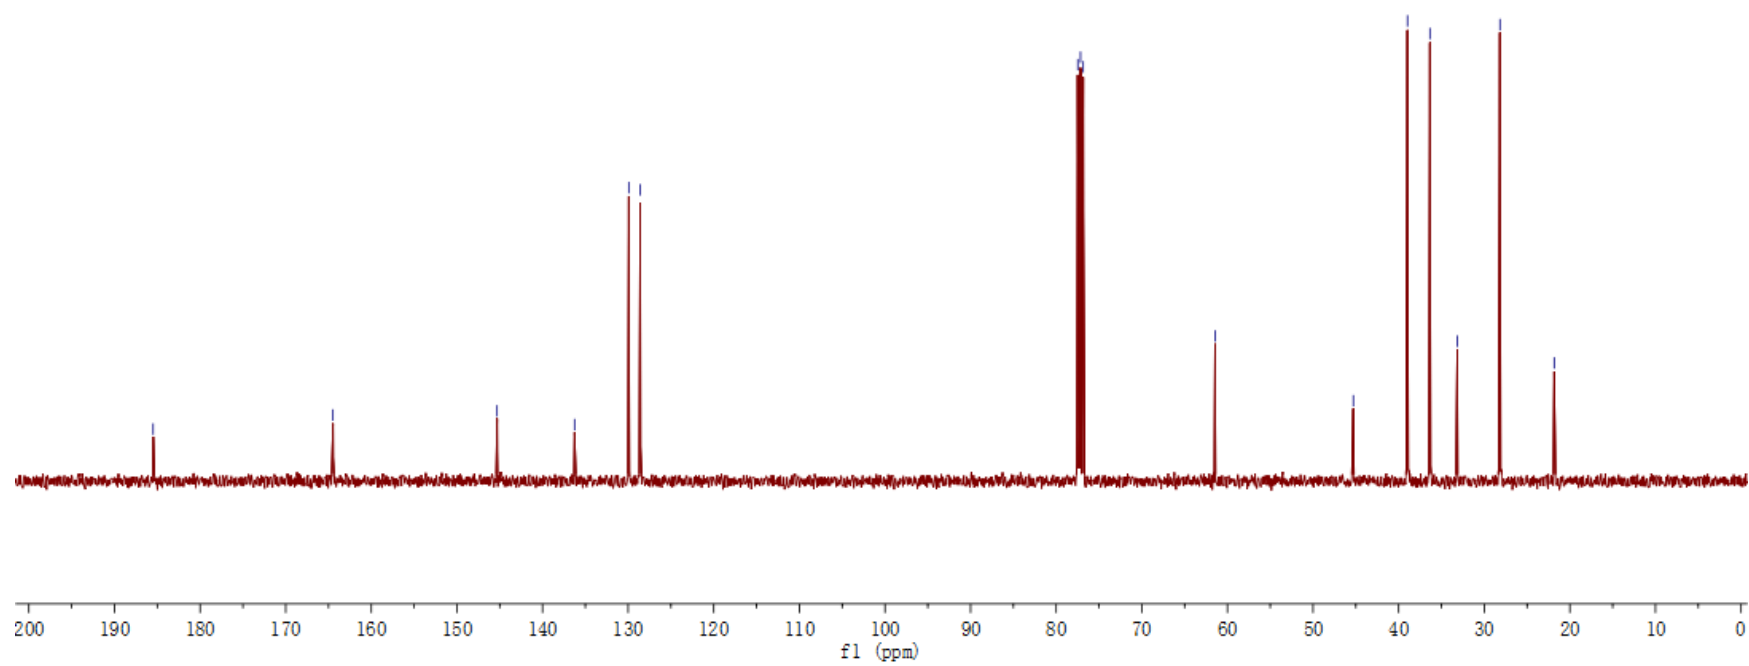

S129

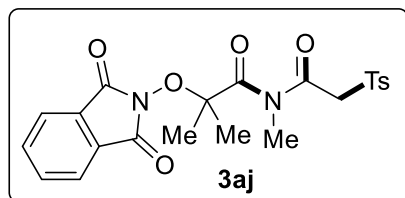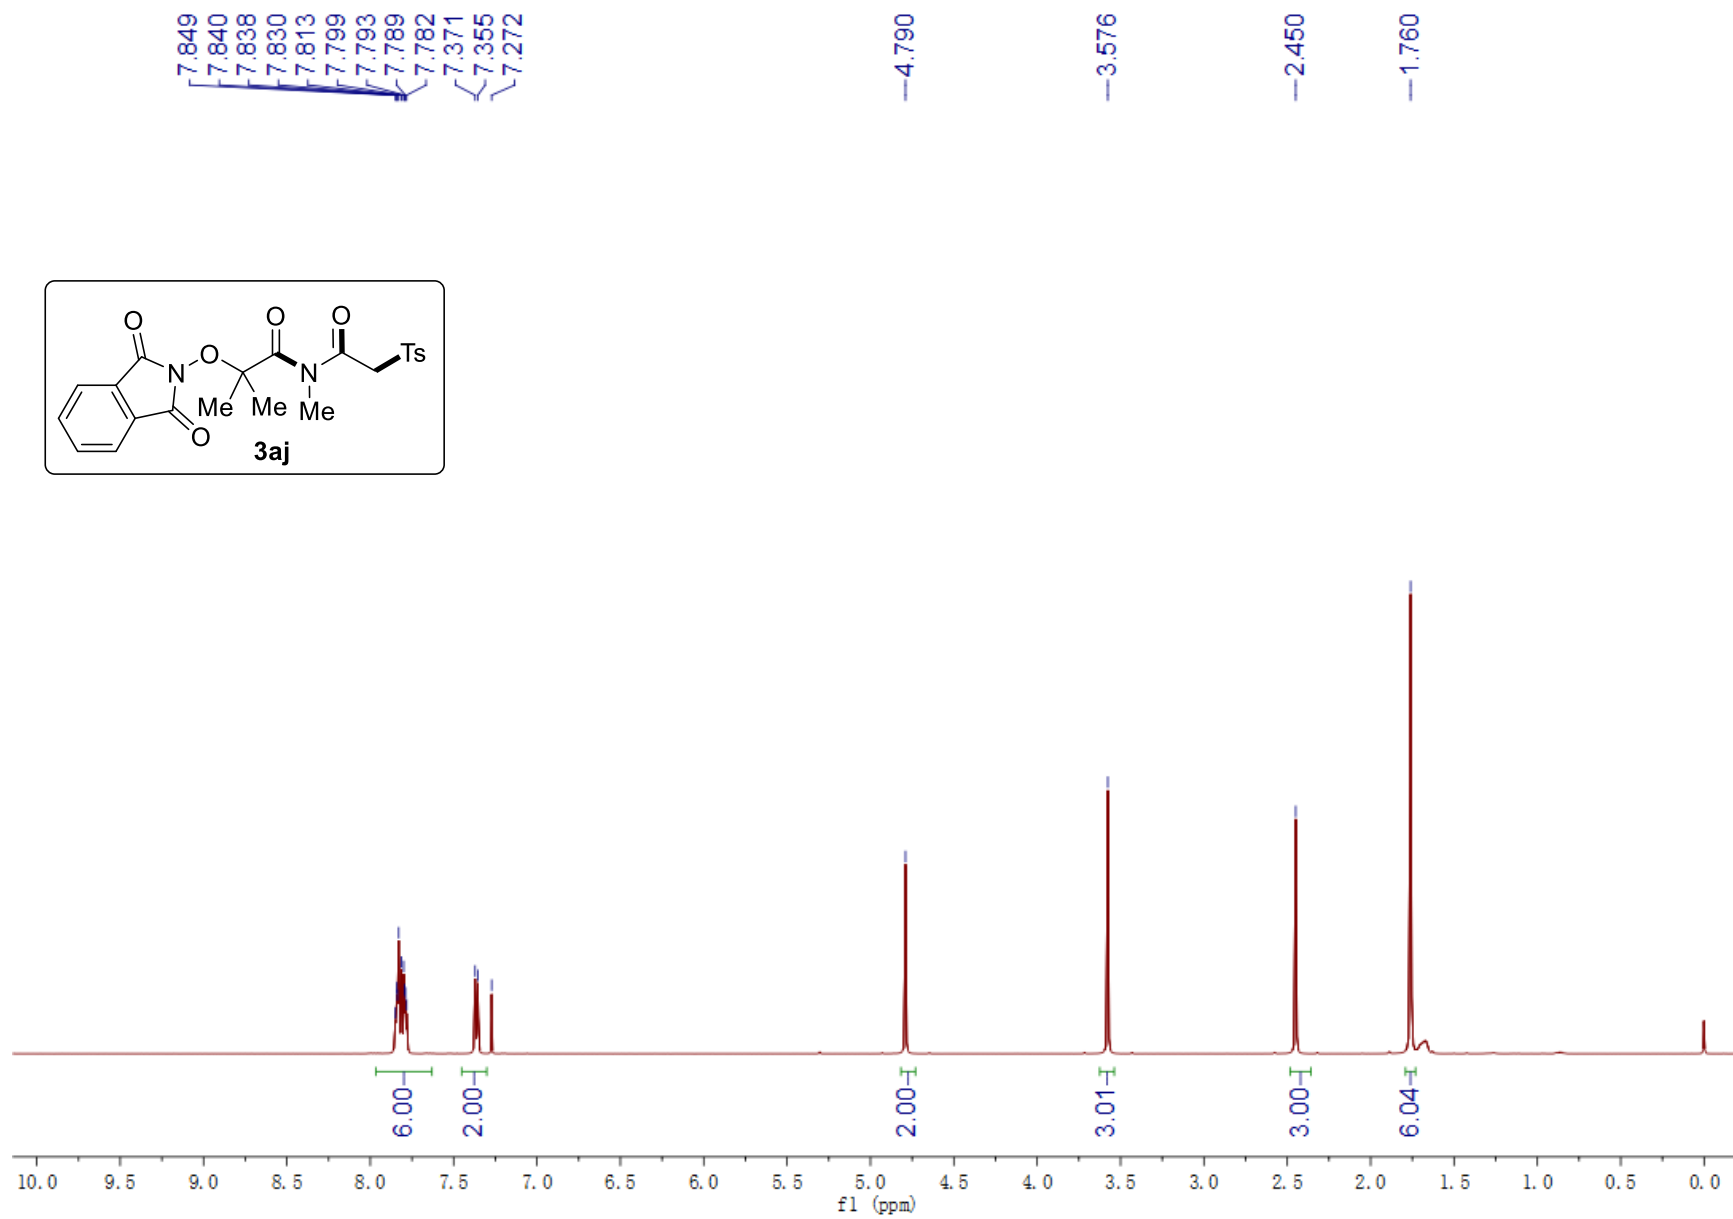

S130

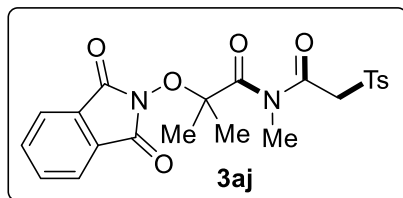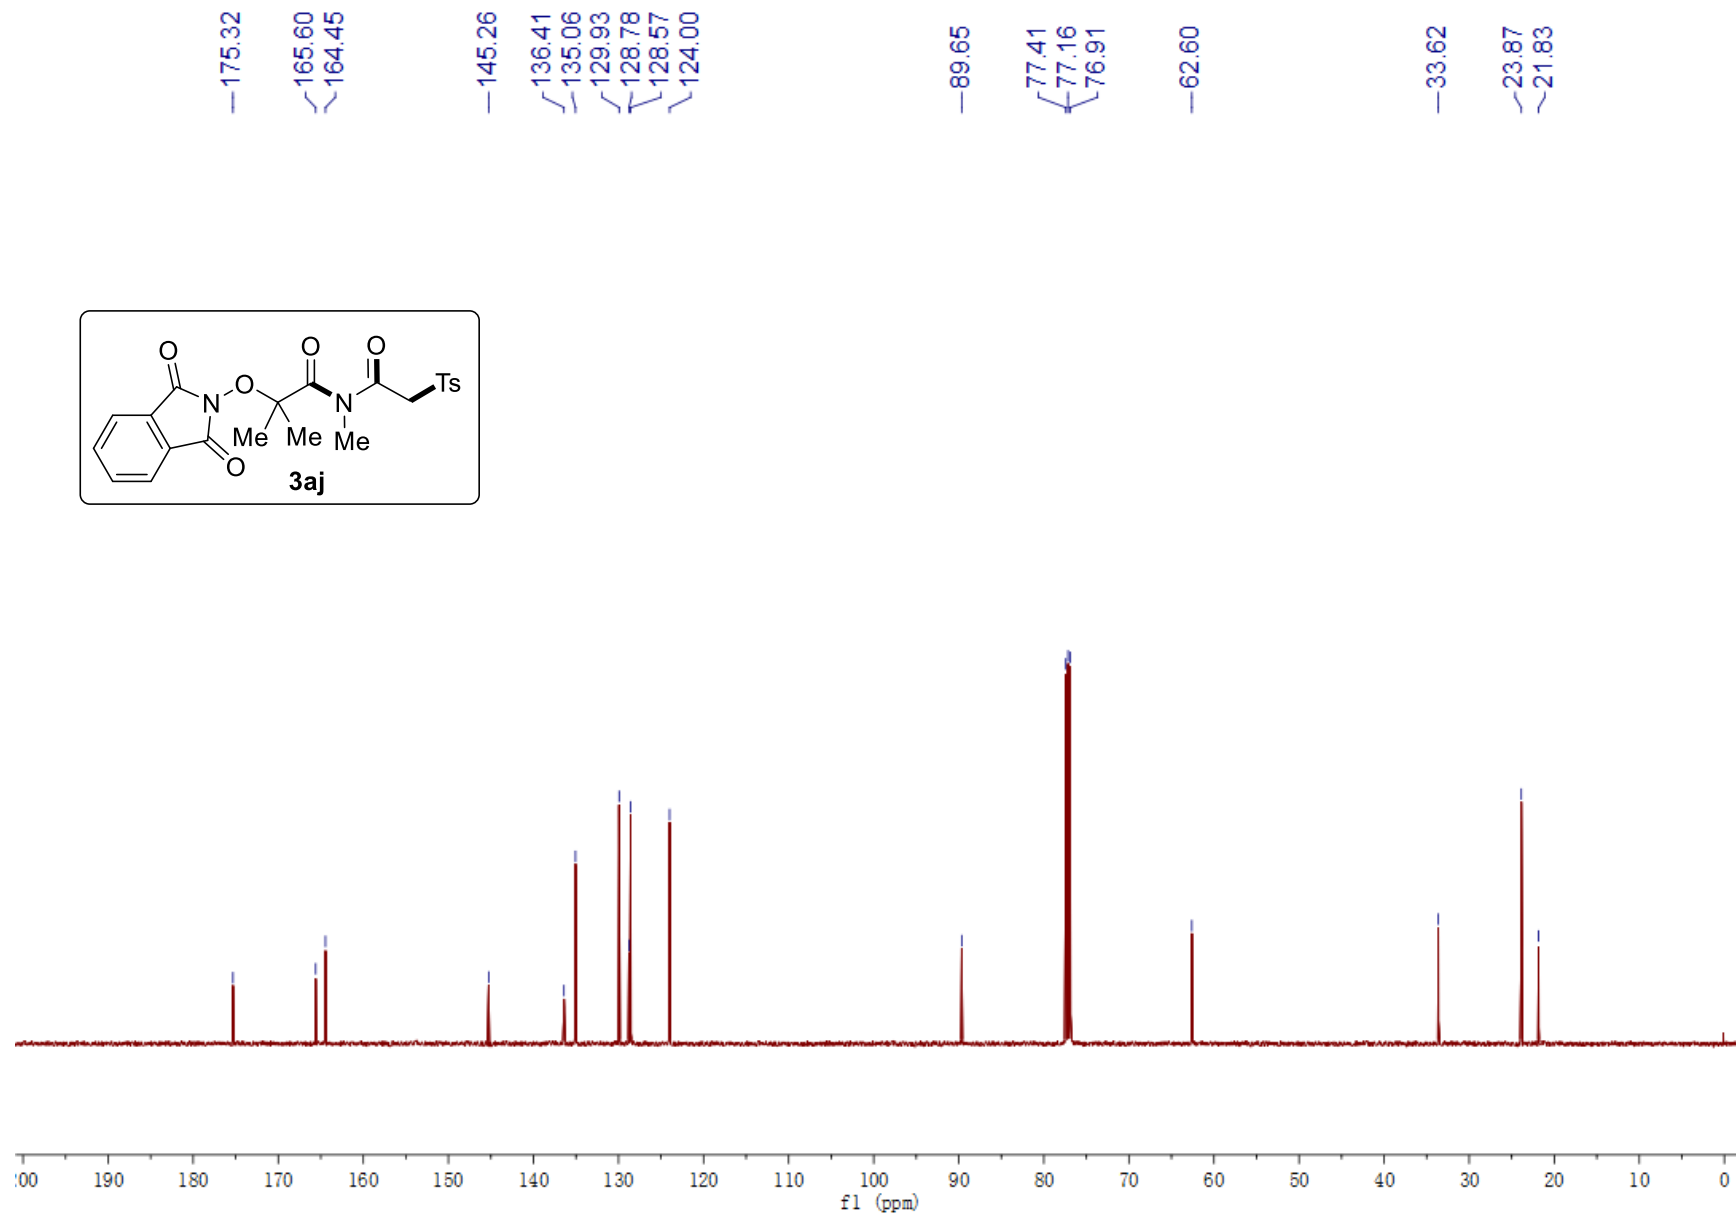

S131

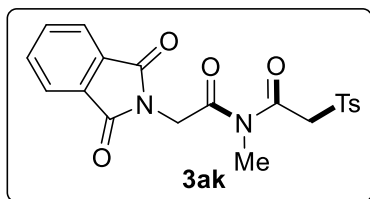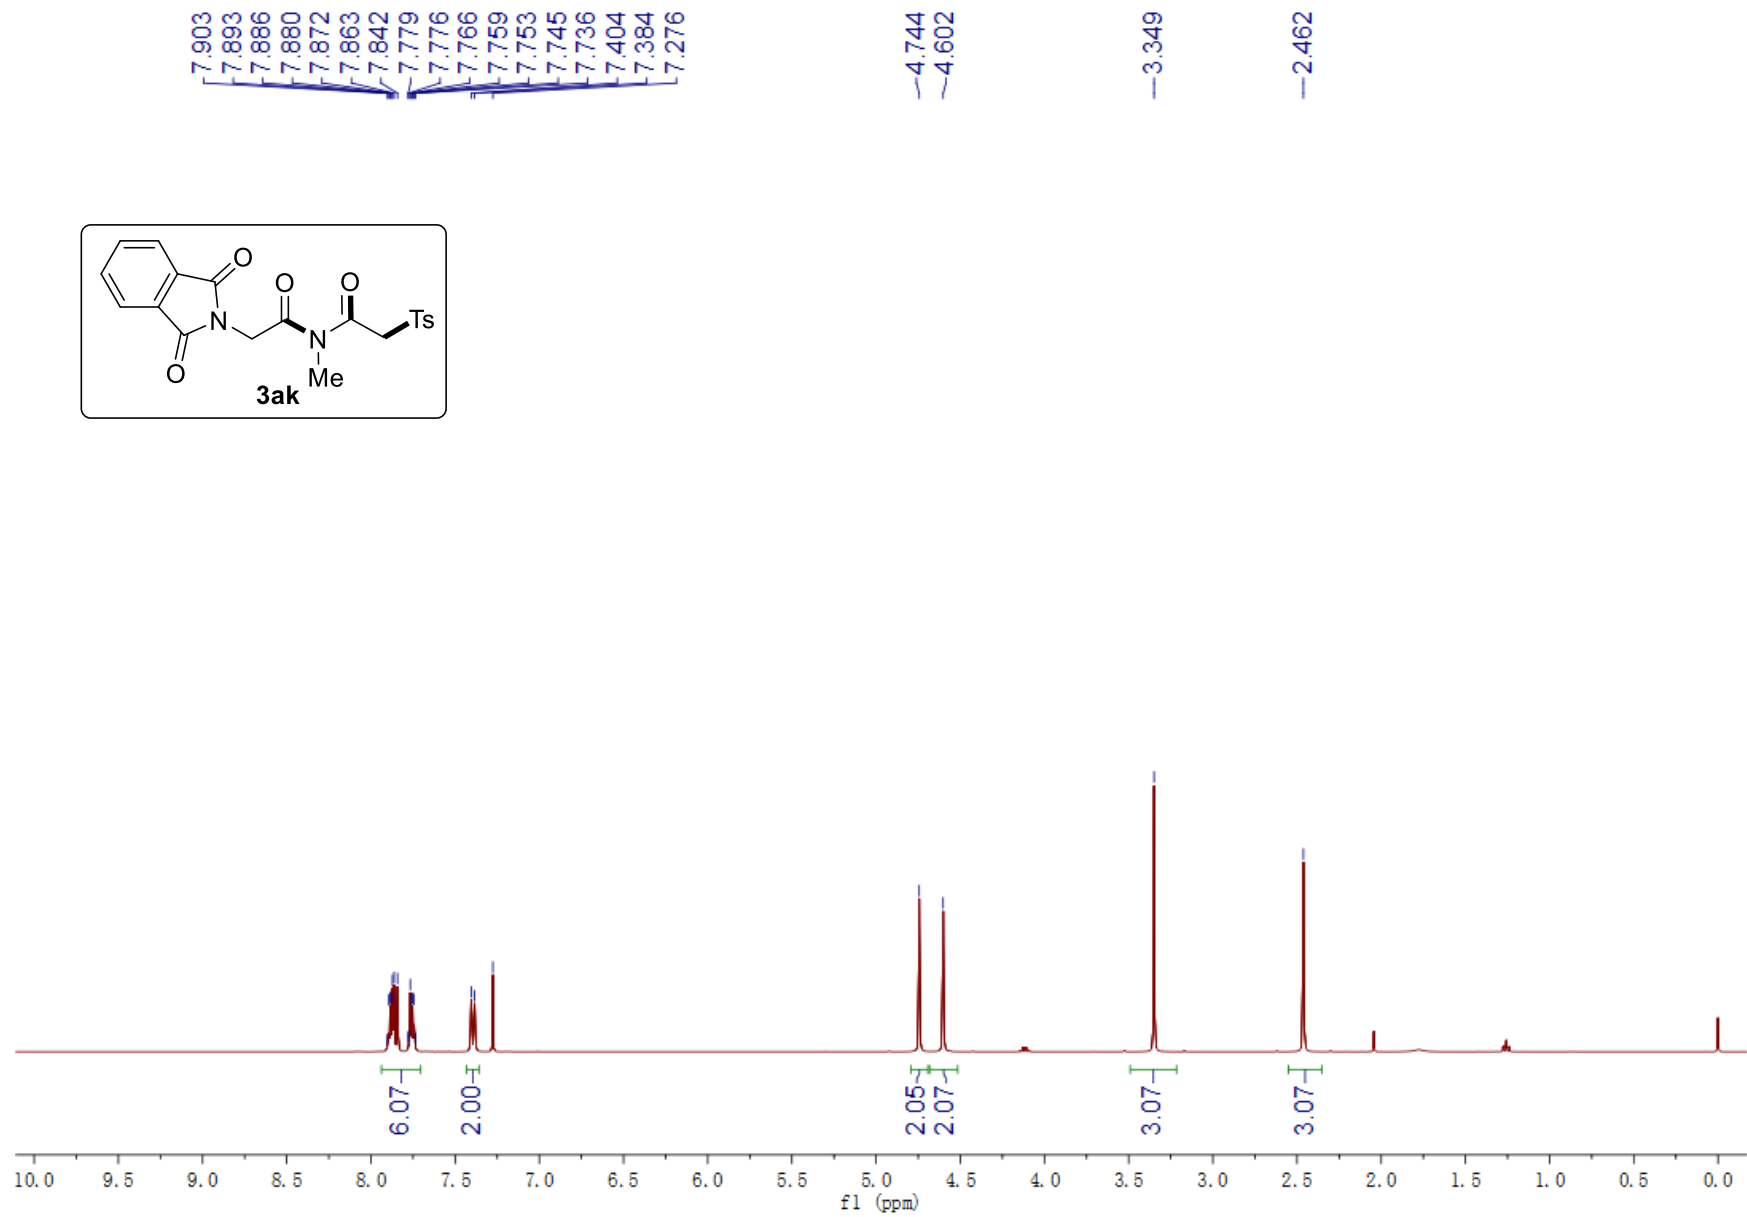

S132

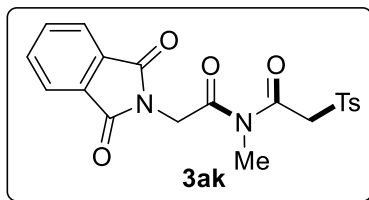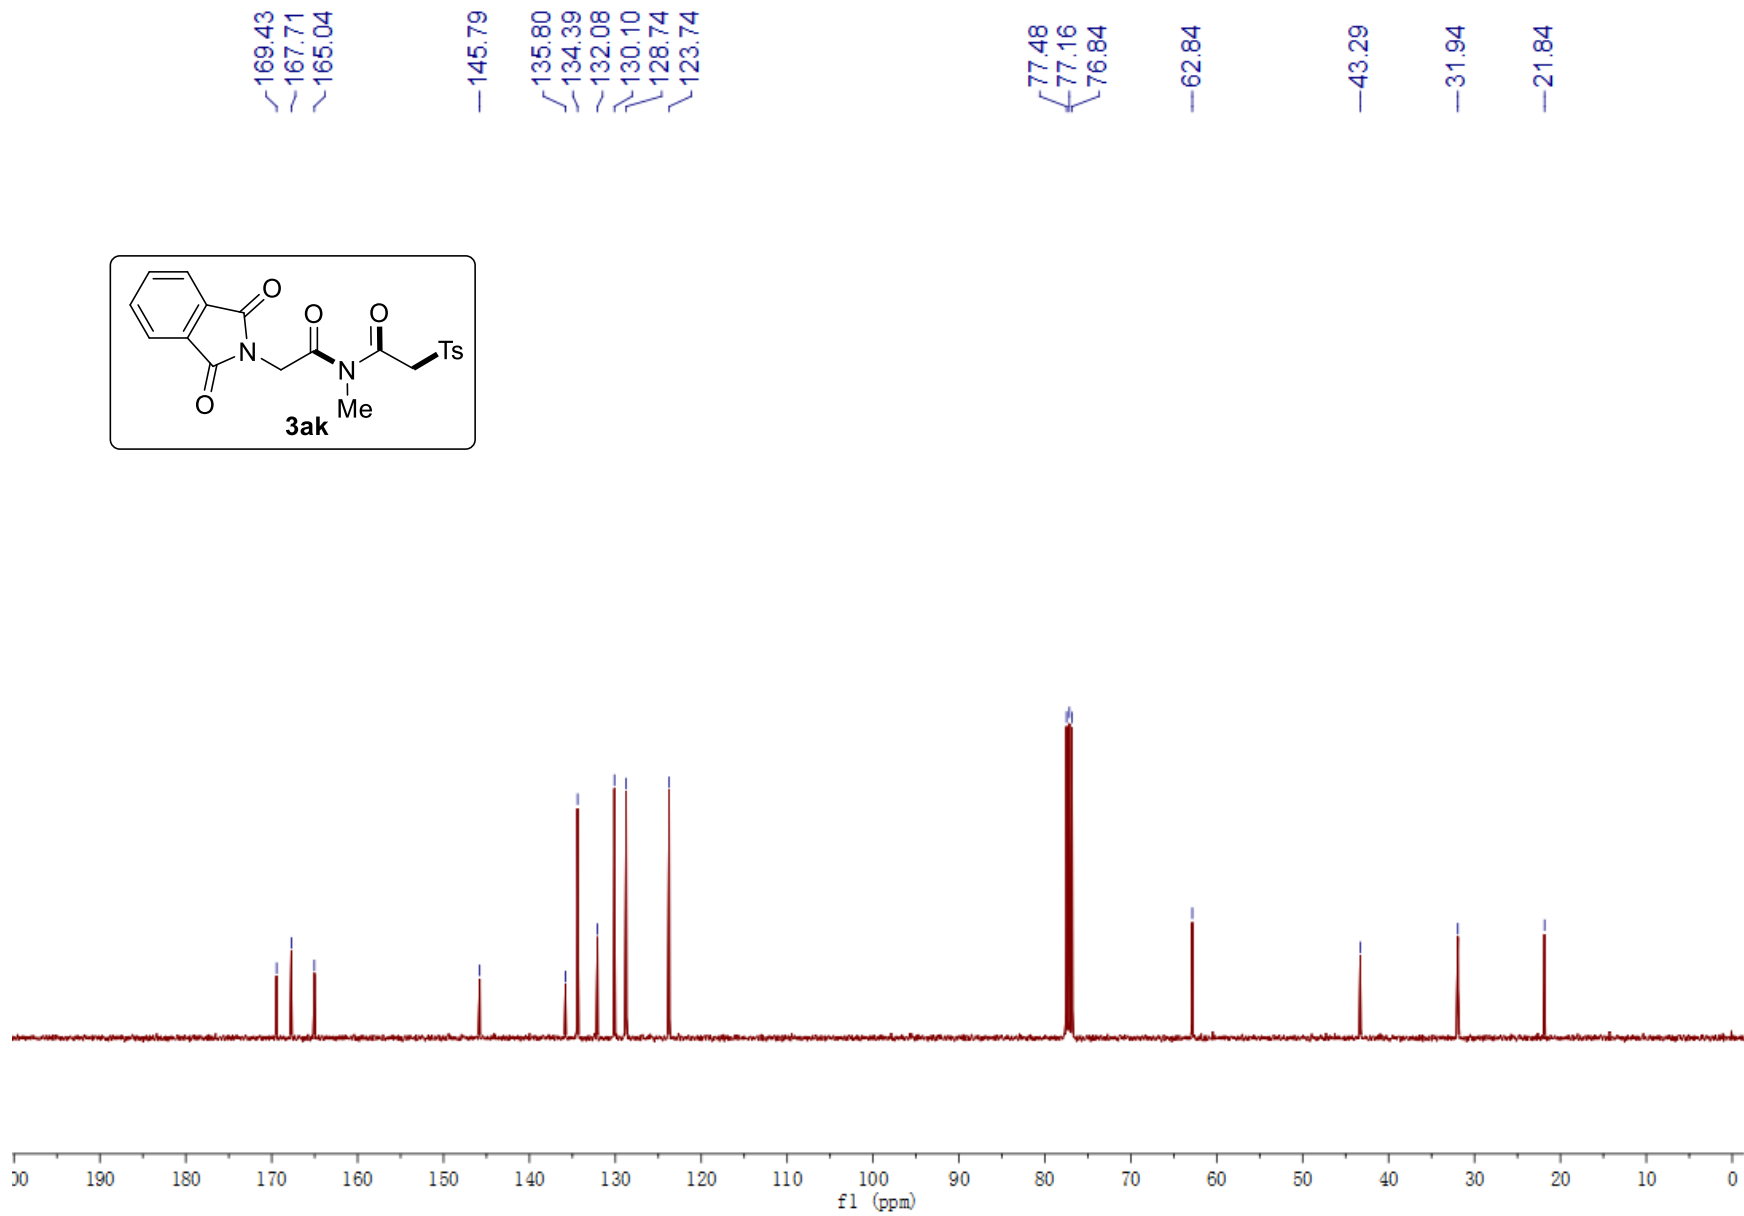

S133

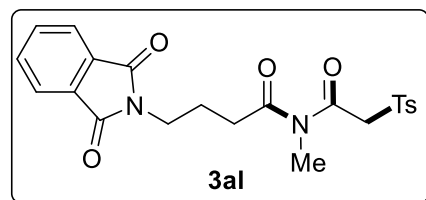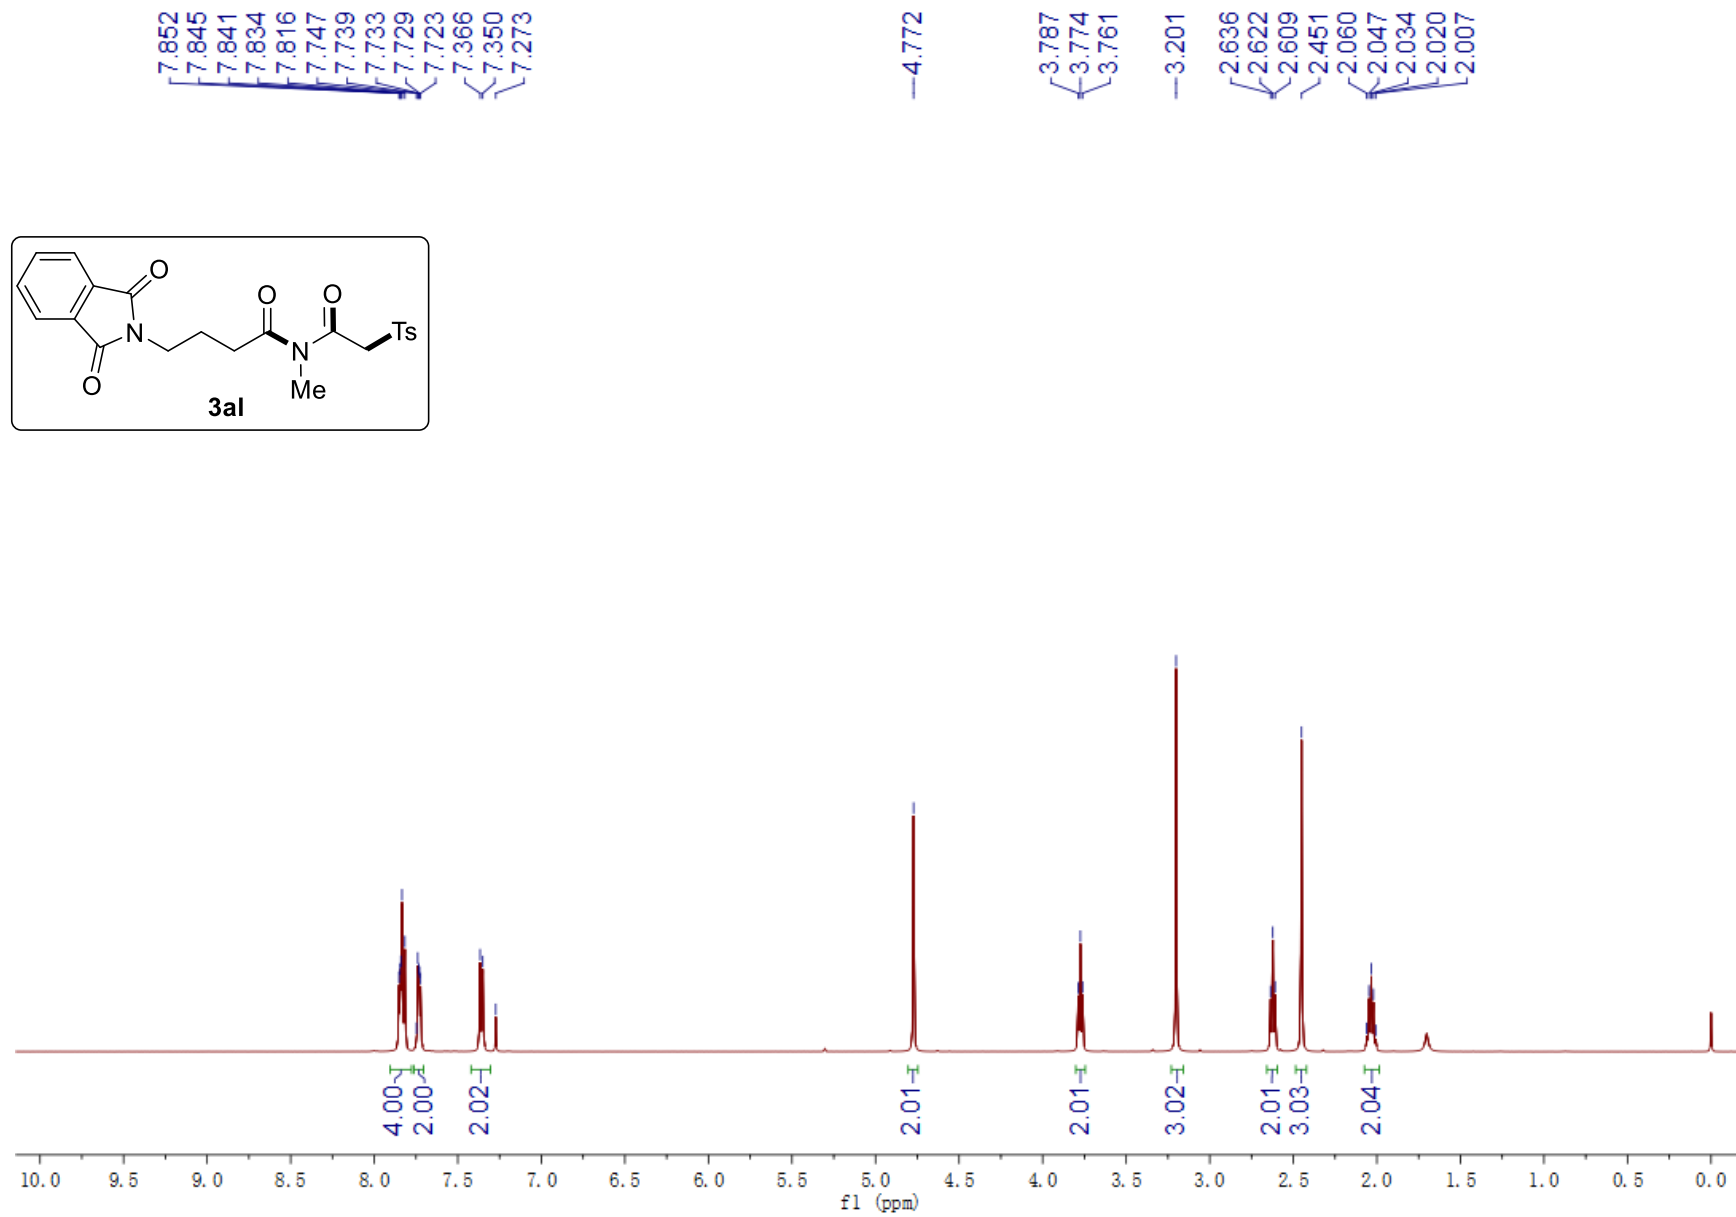

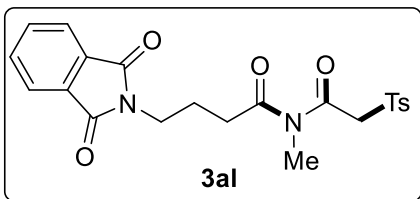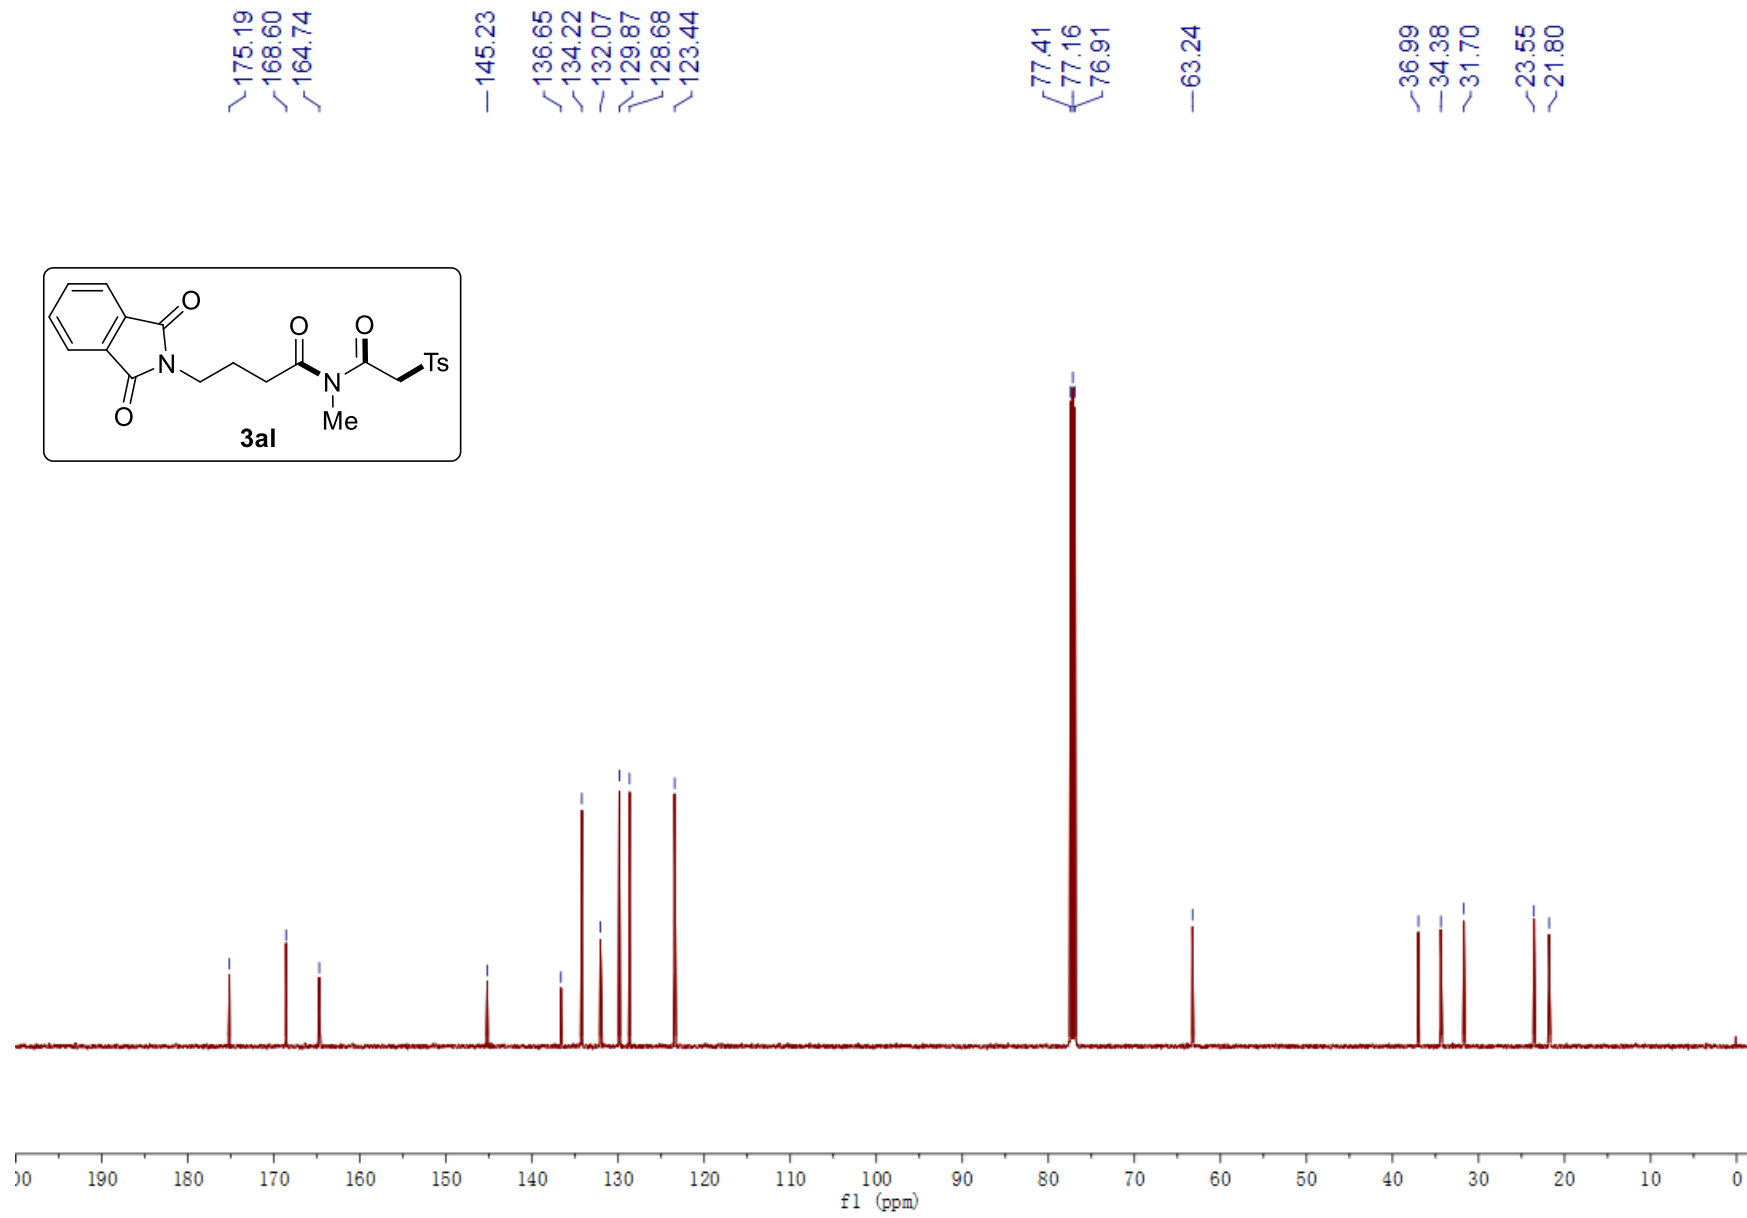

S135

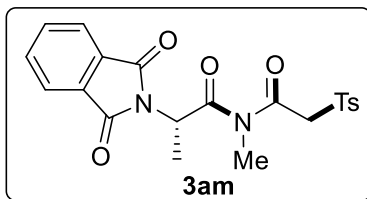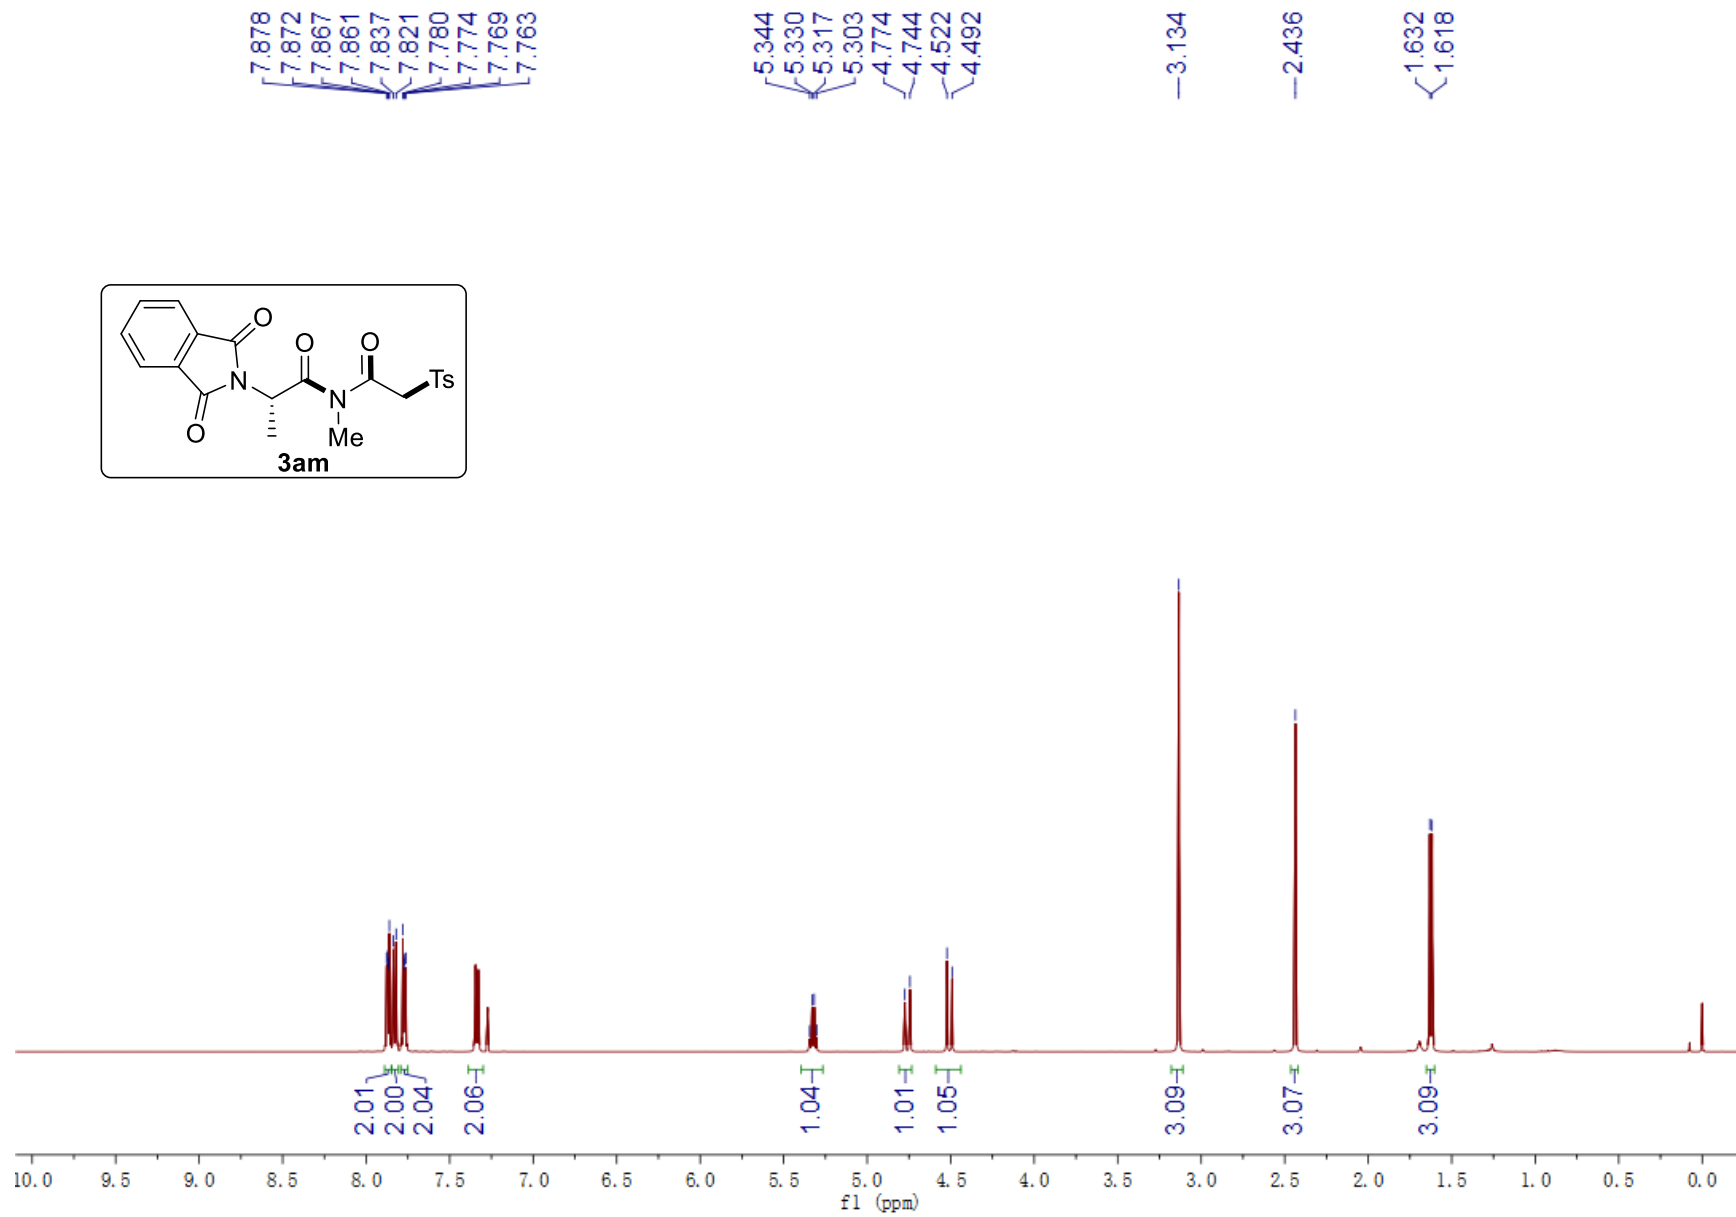

S136



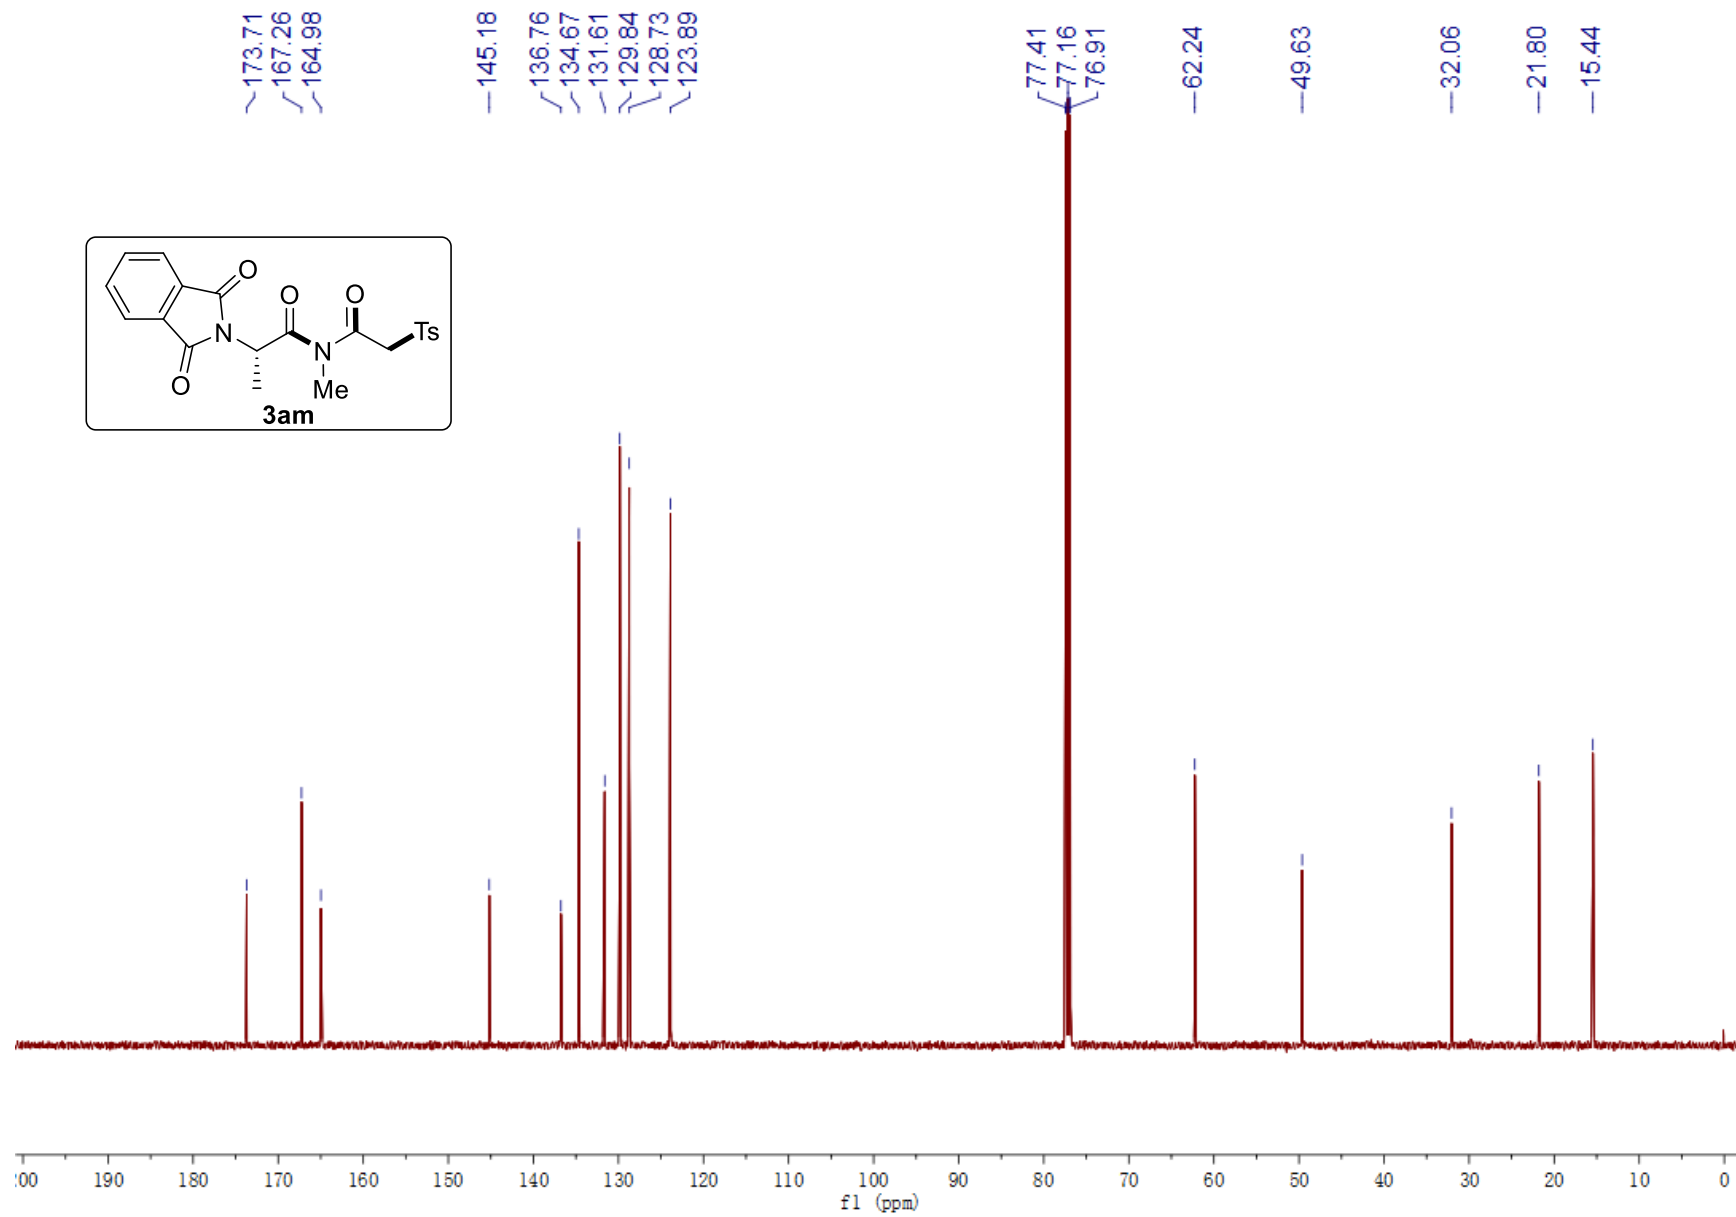

S137

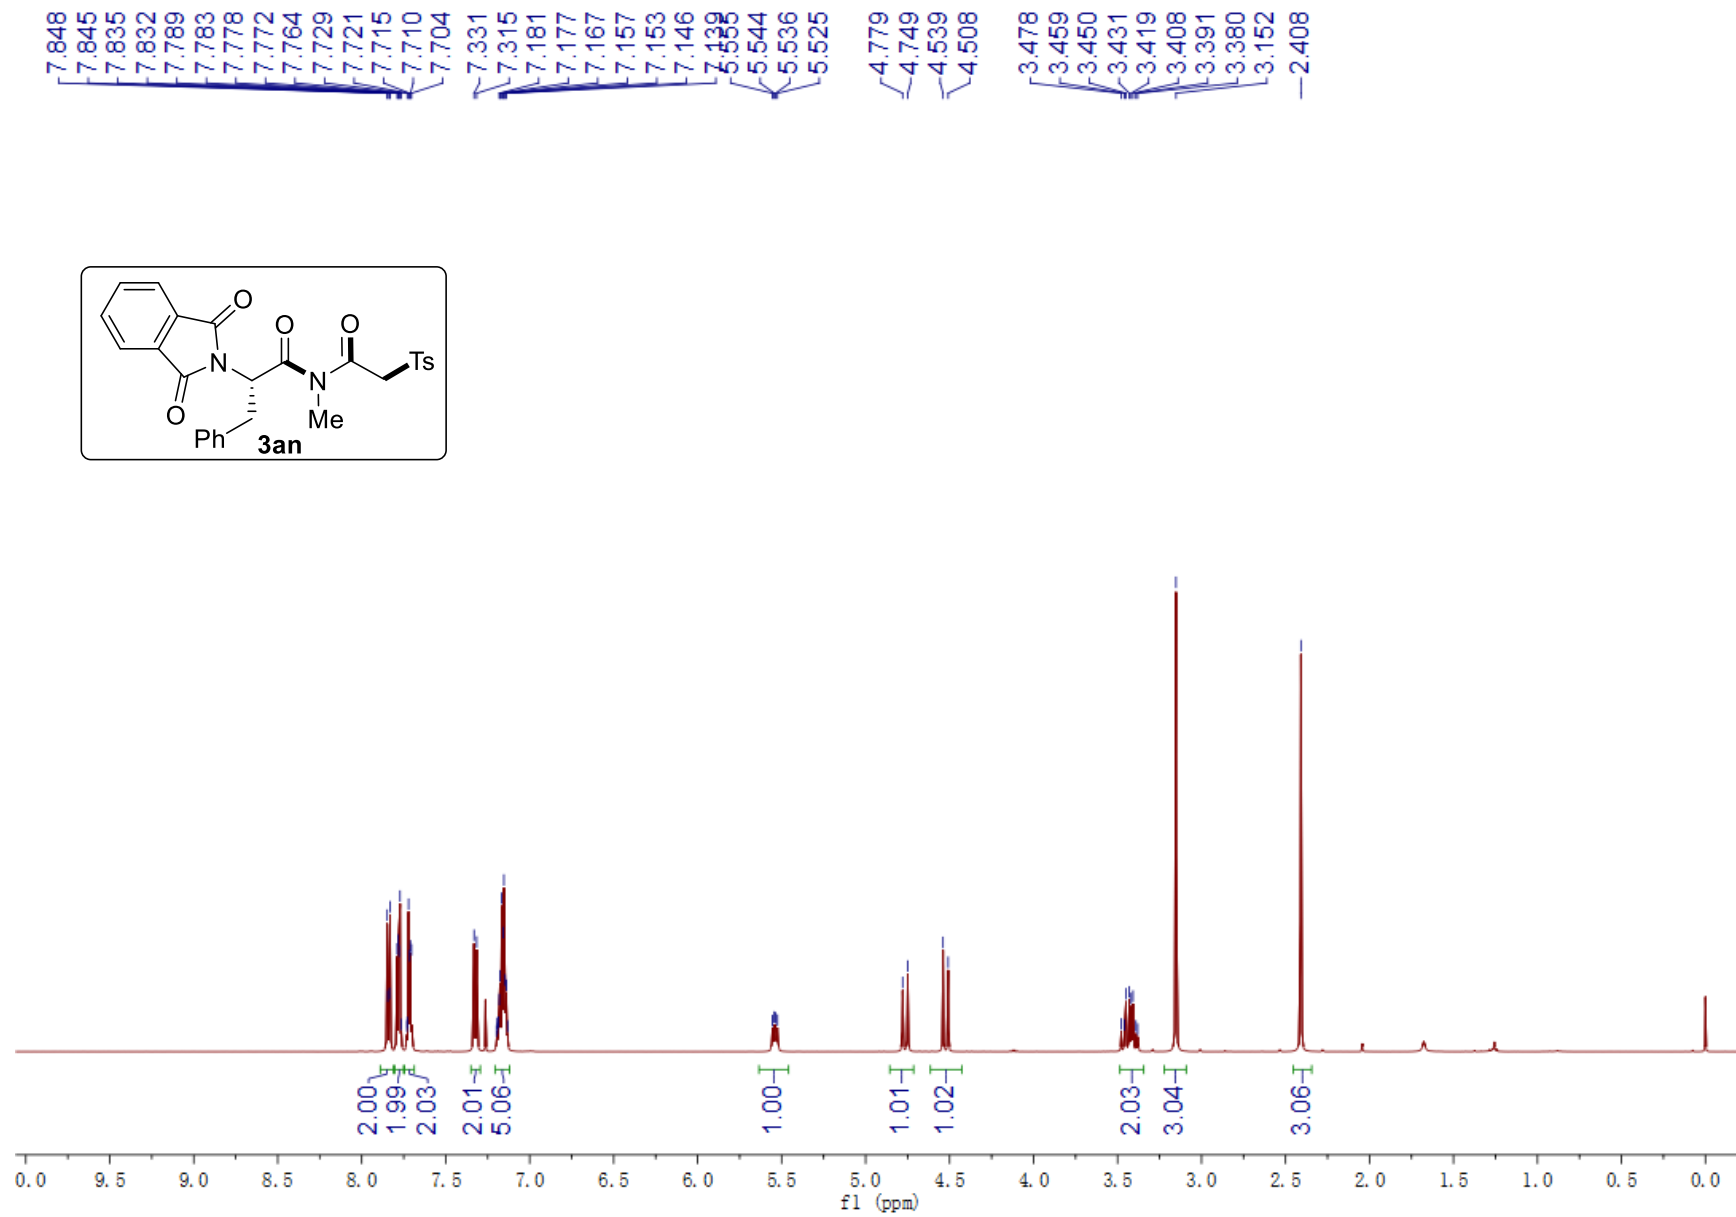

S138

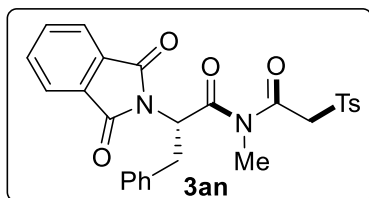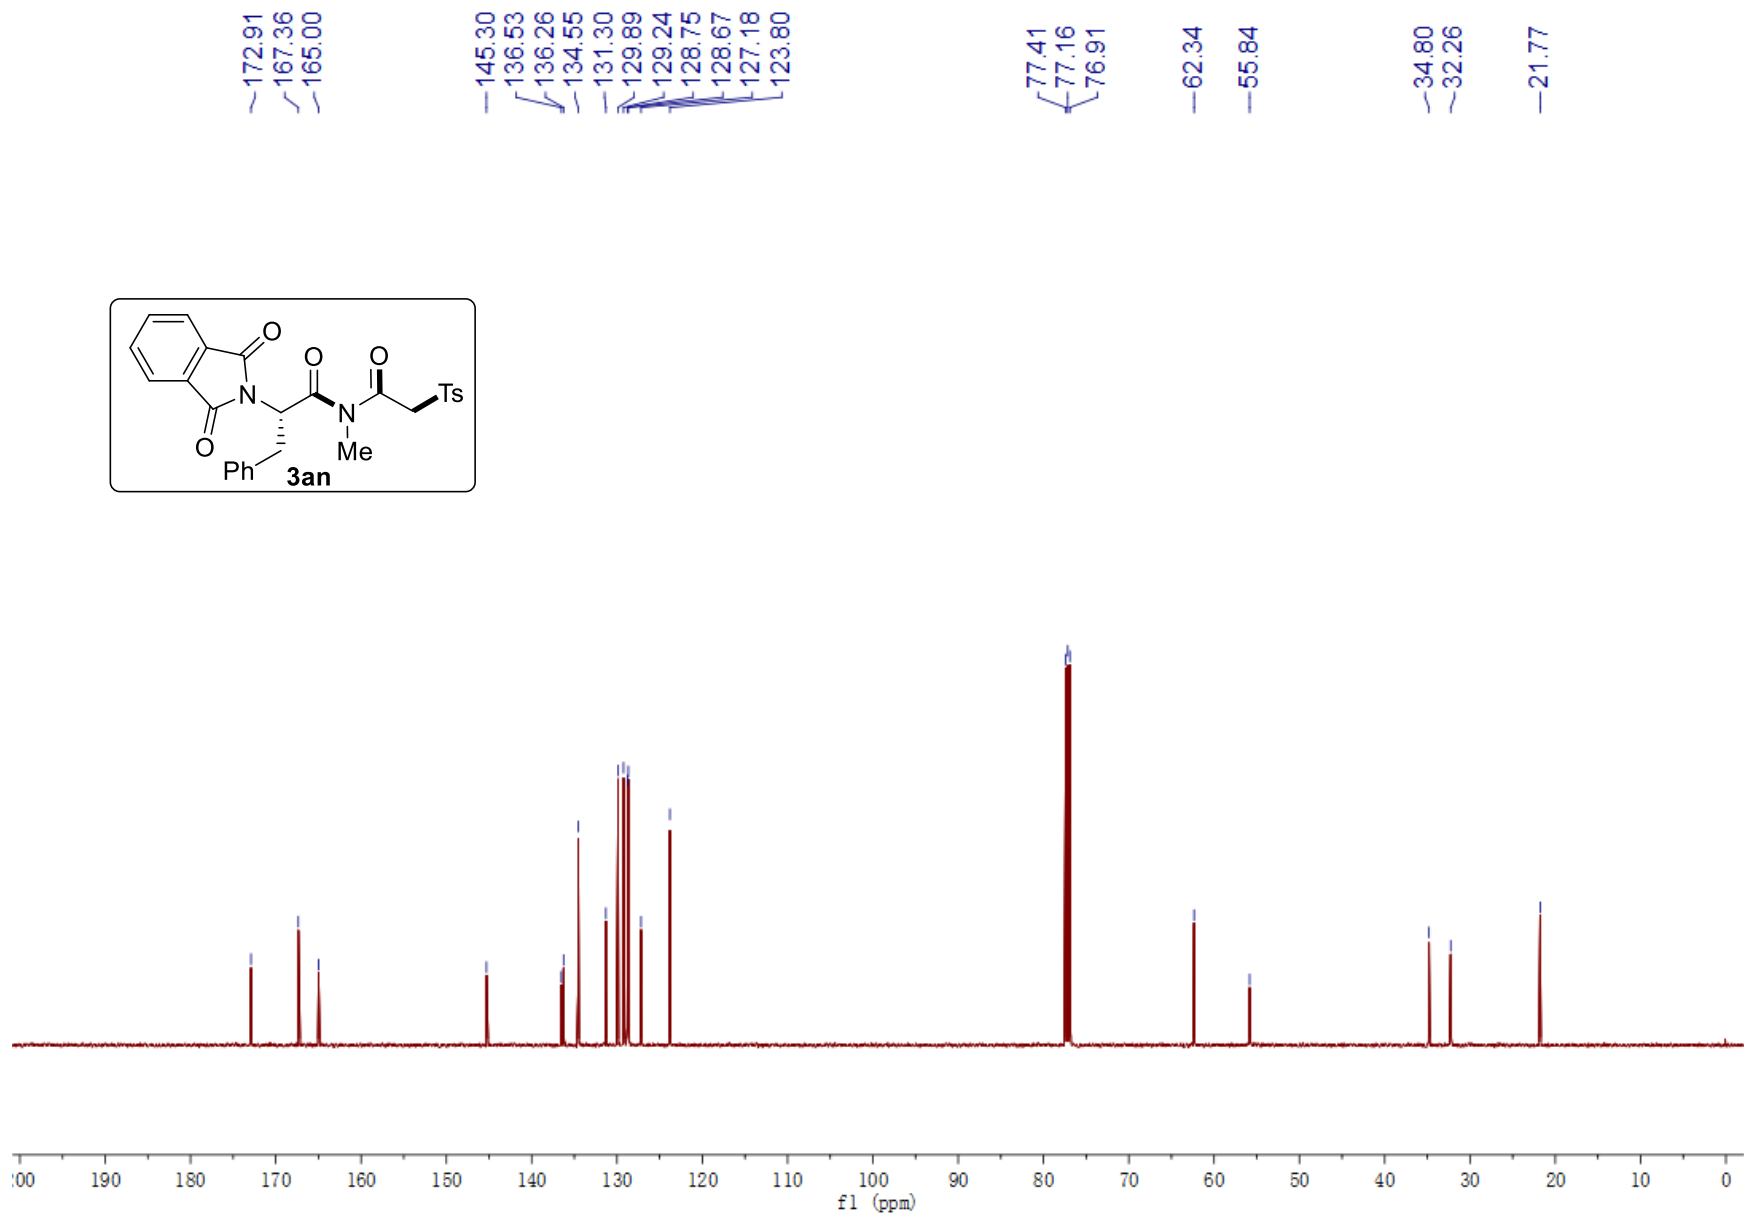

S139

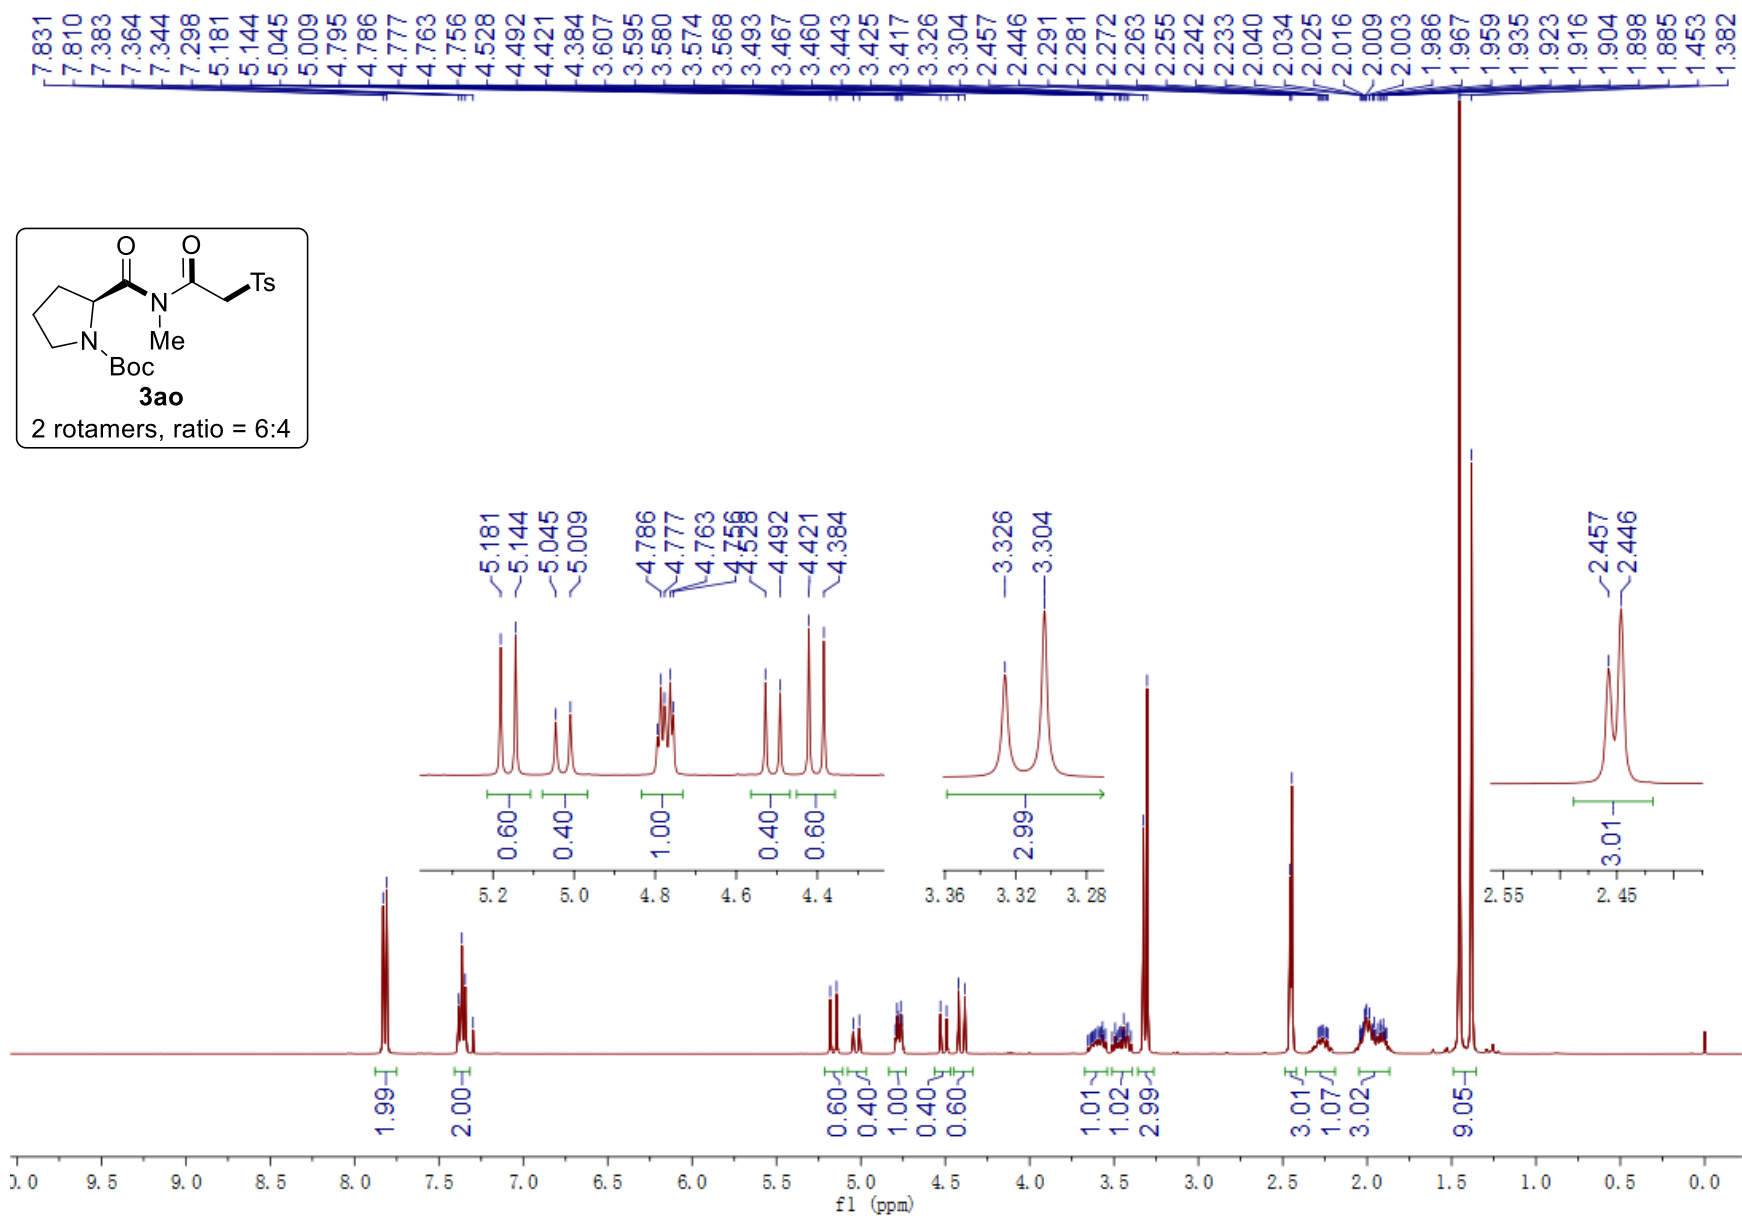

S140

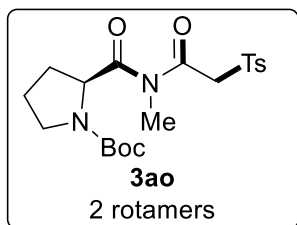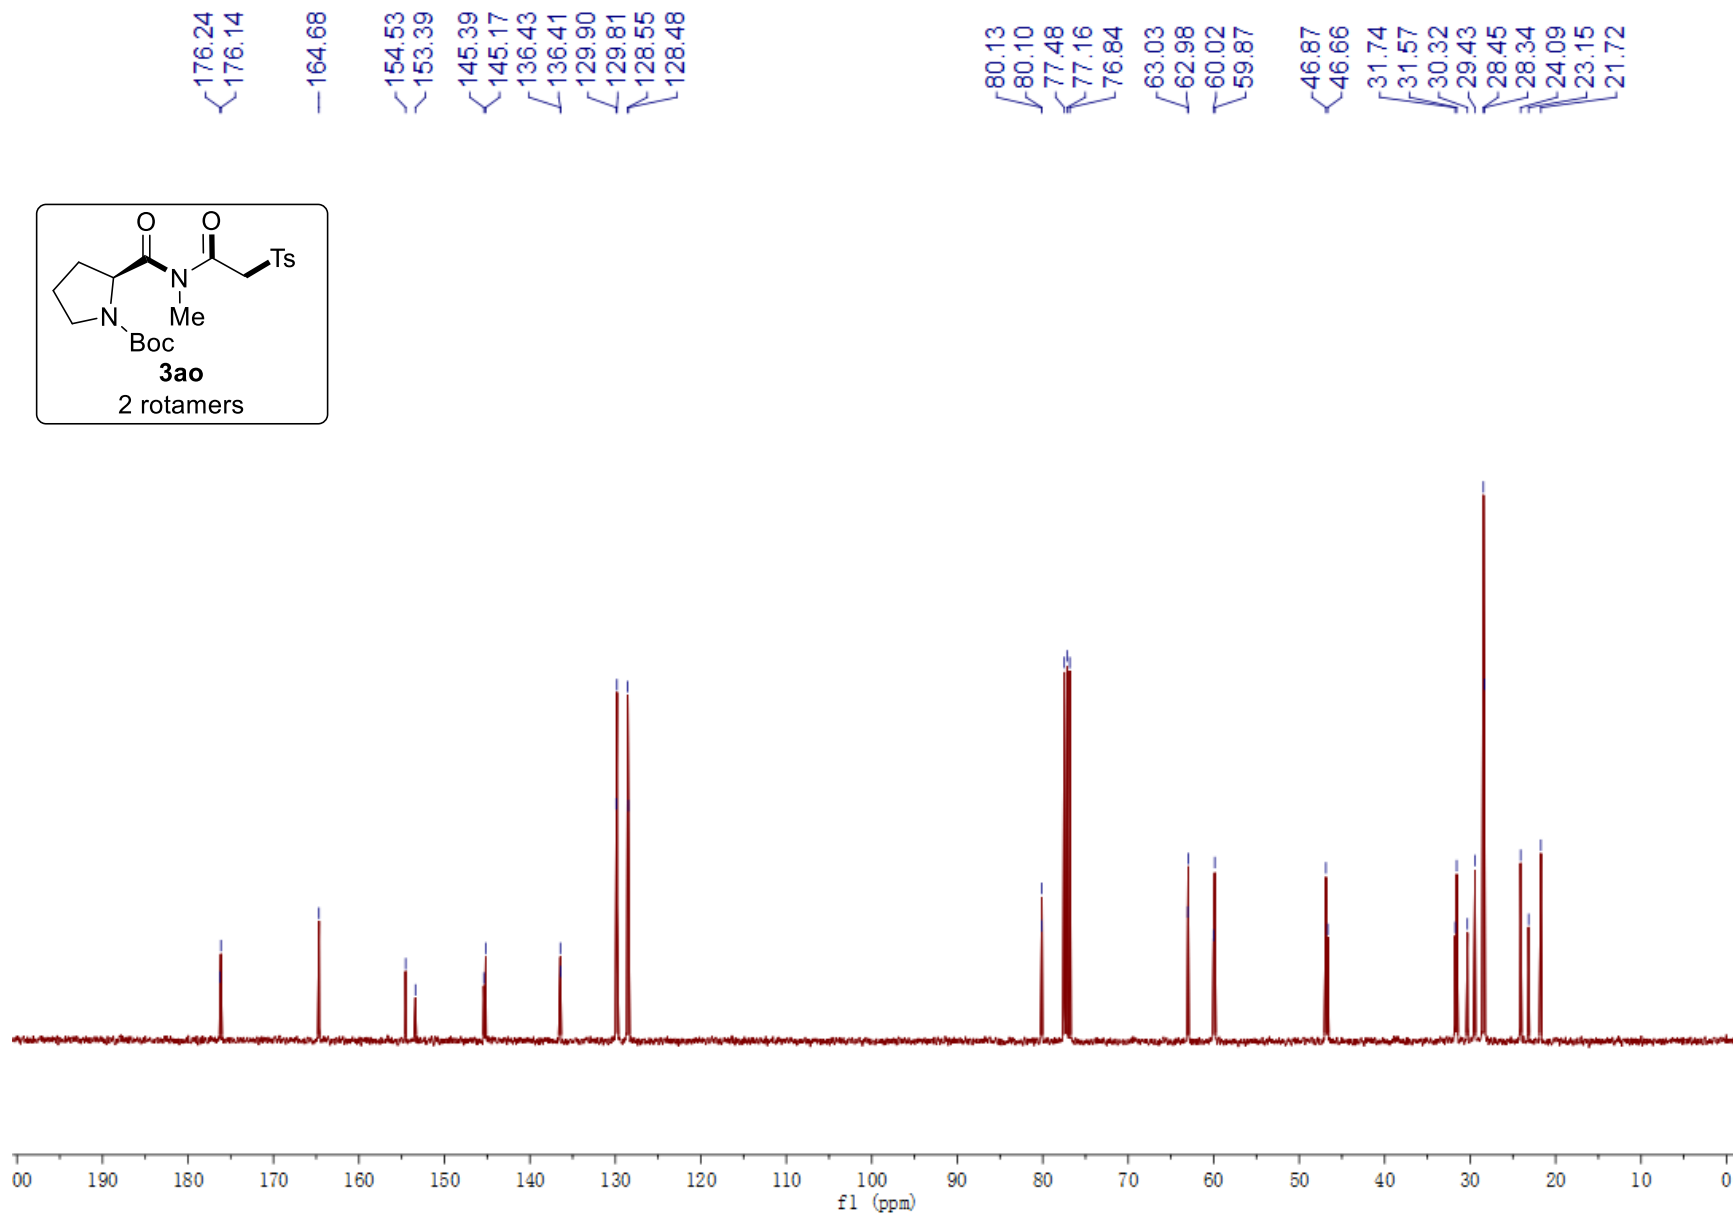

S141

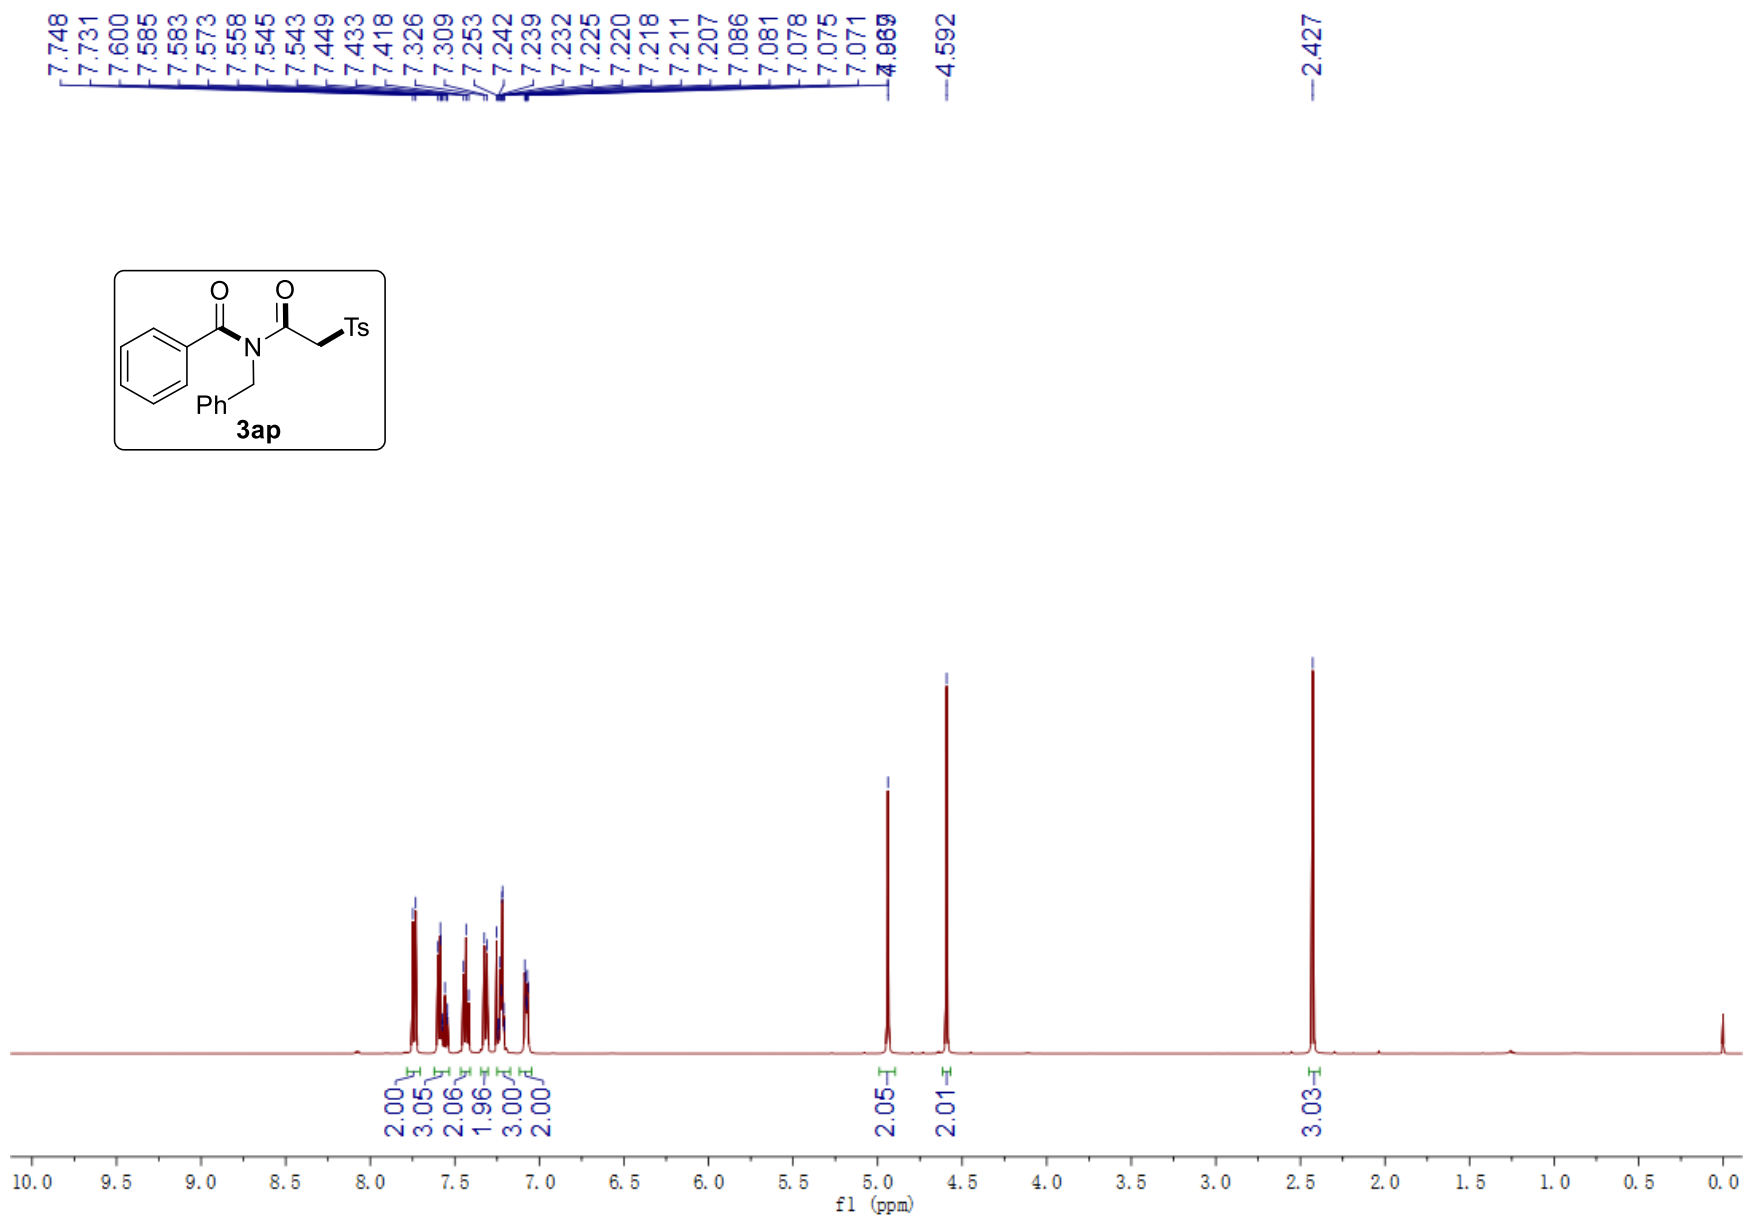

S142

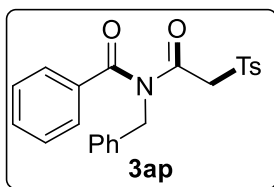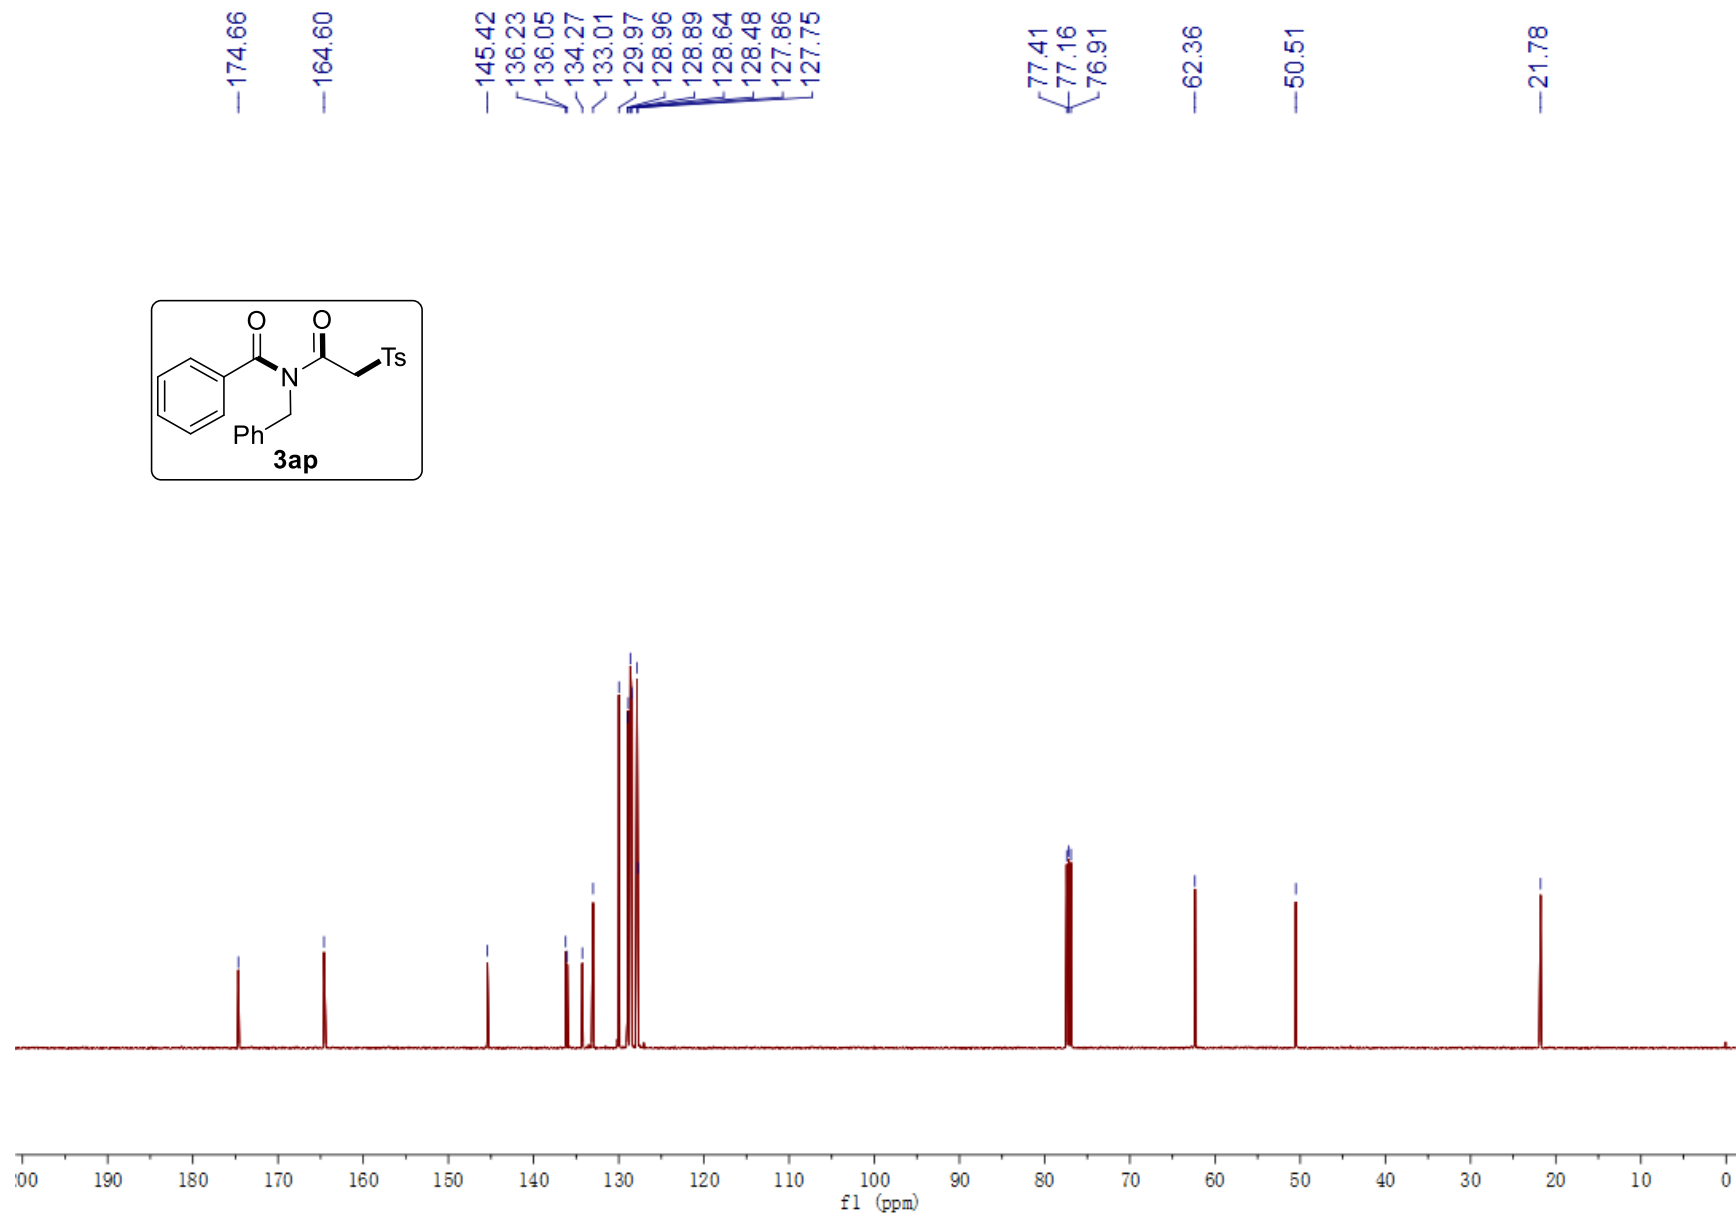

S143





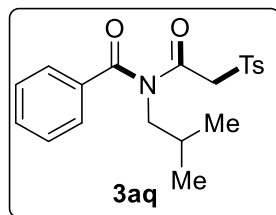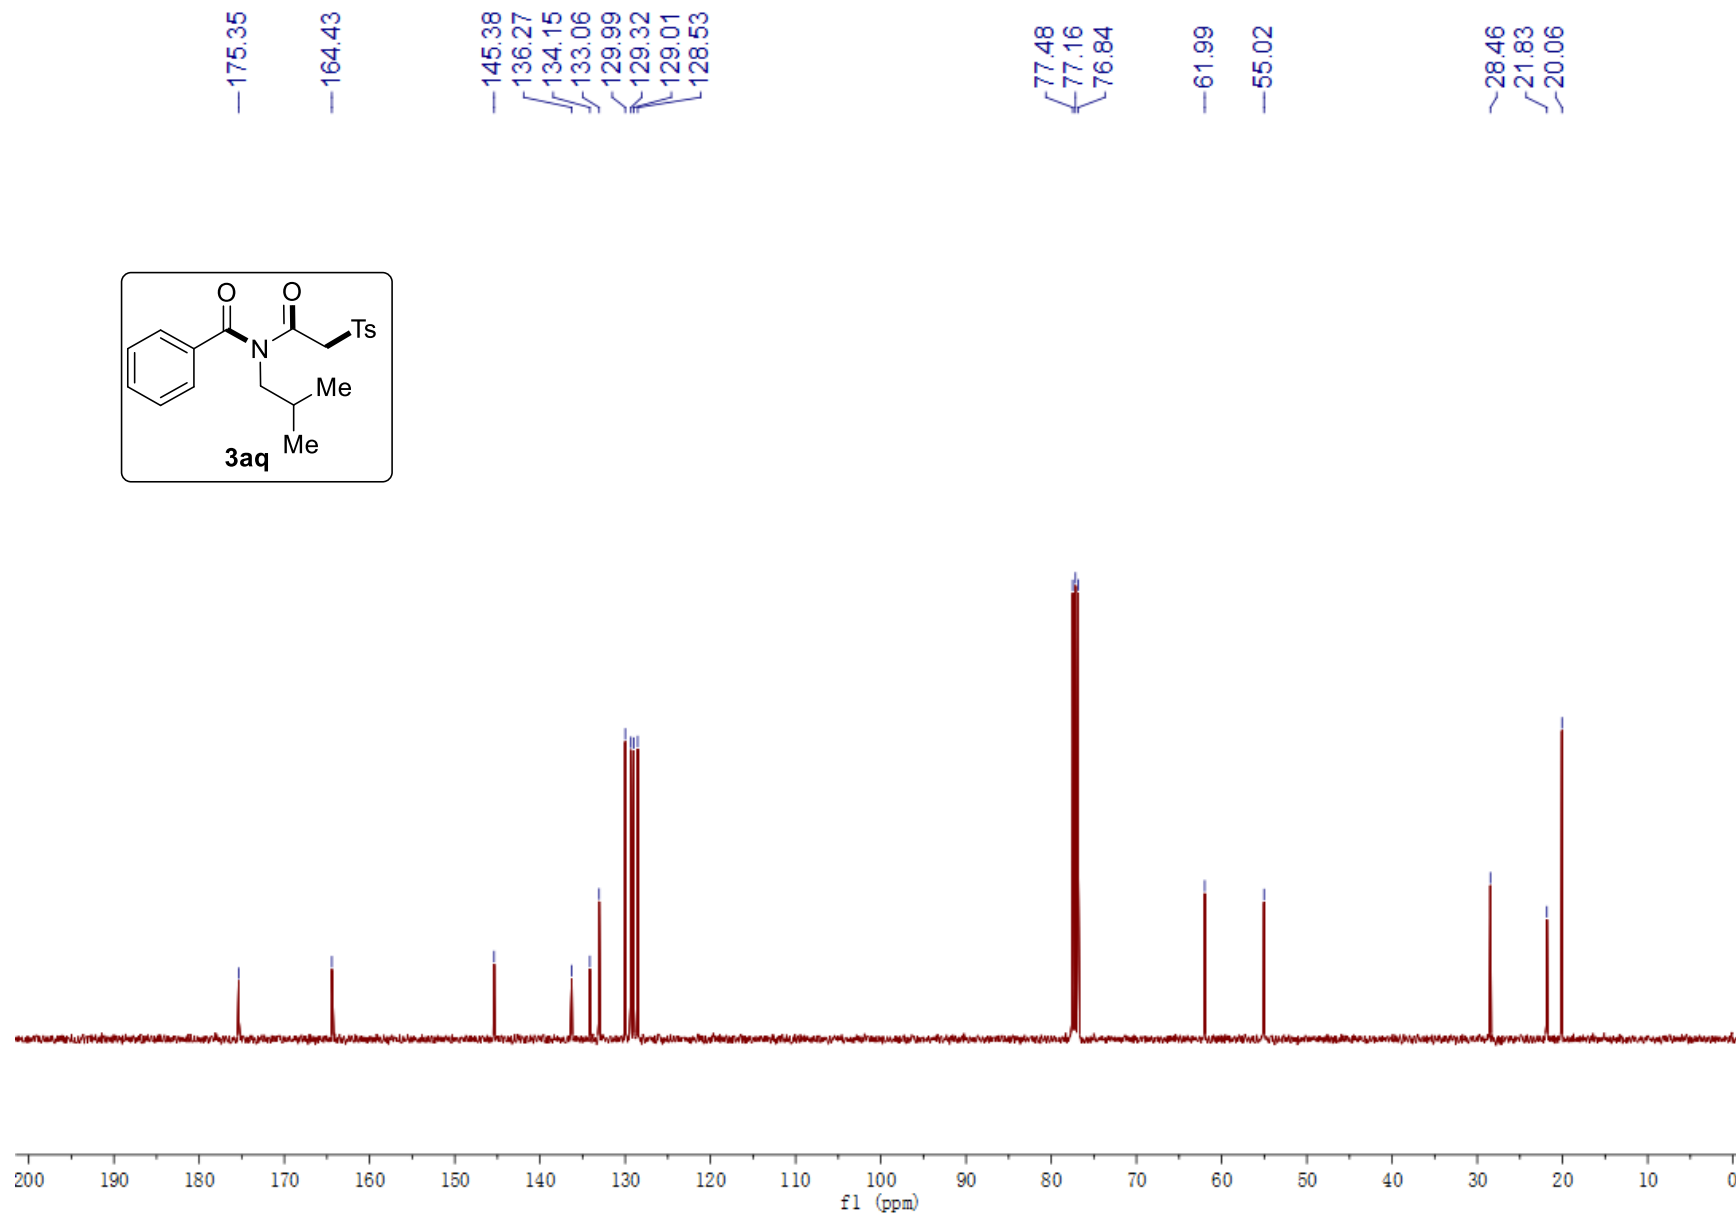

S145

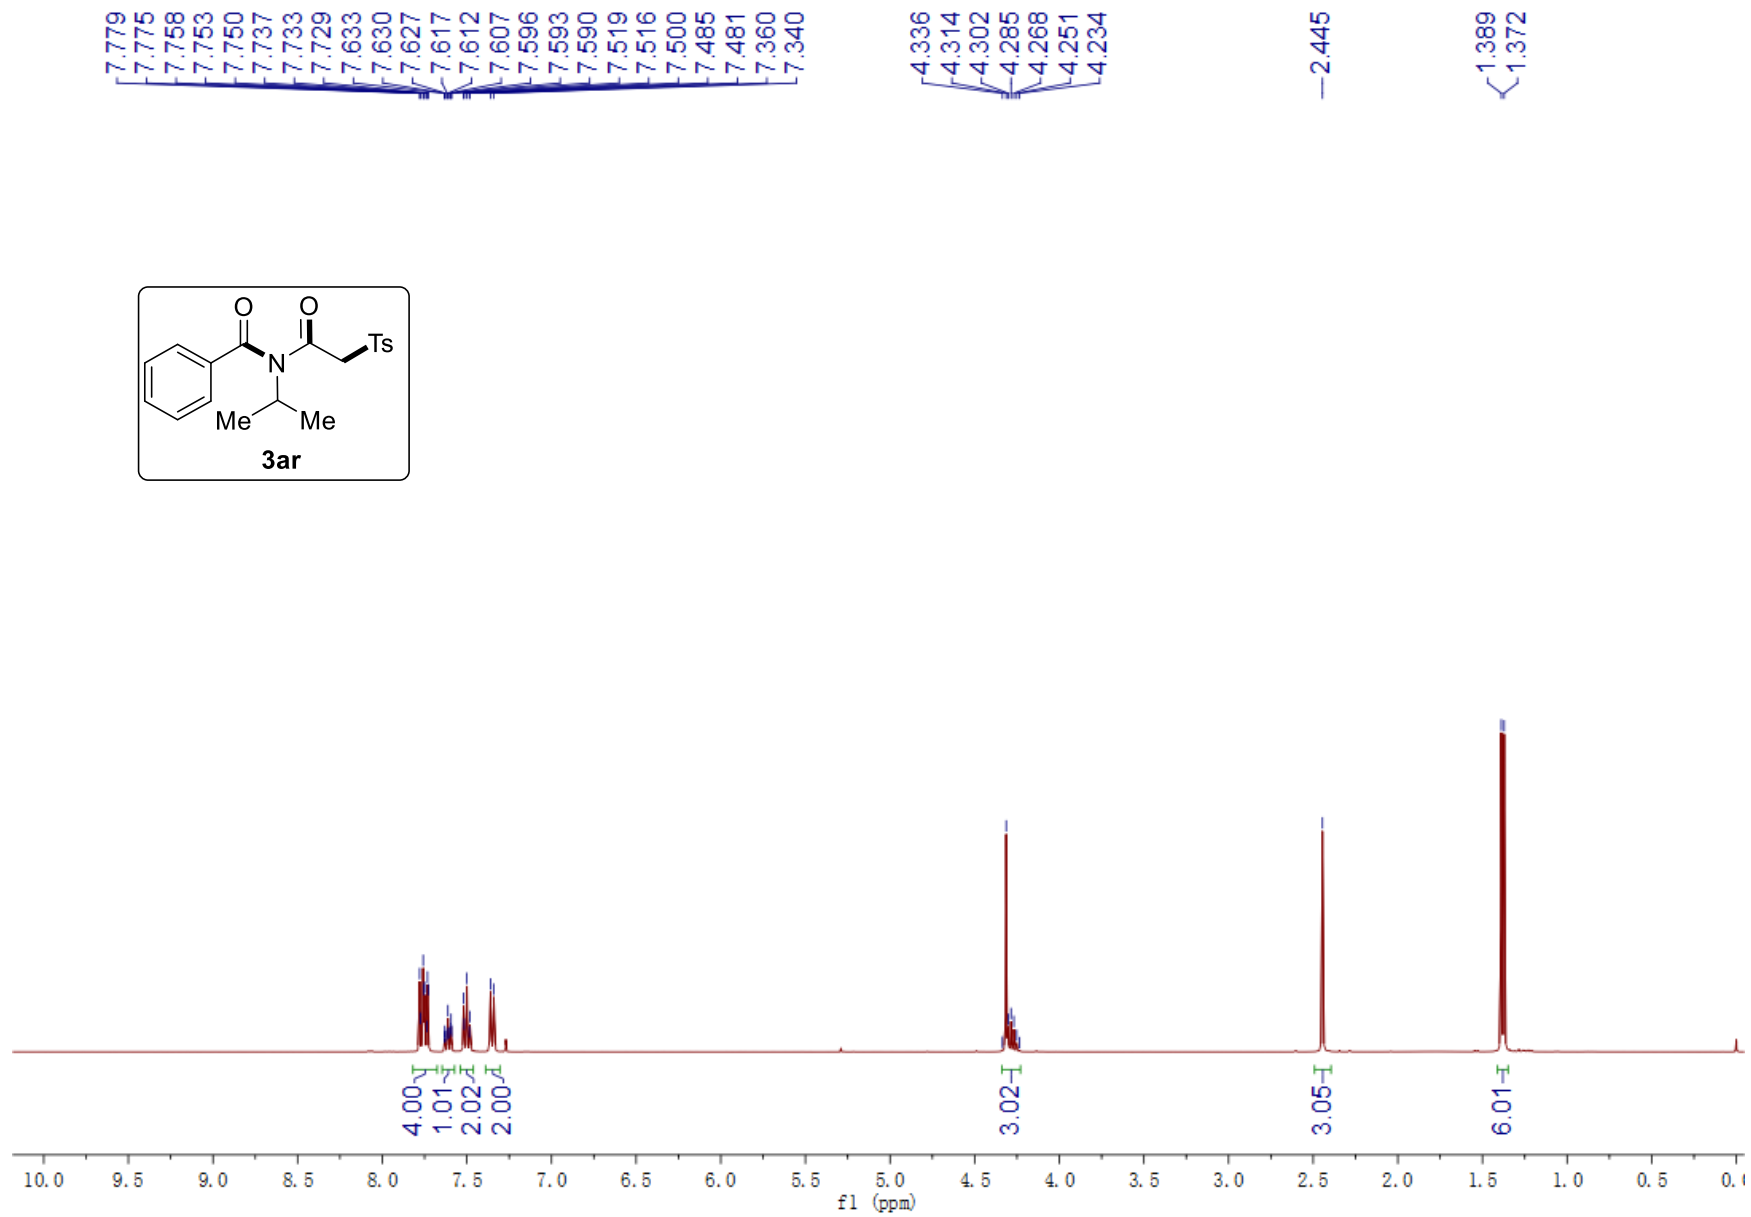

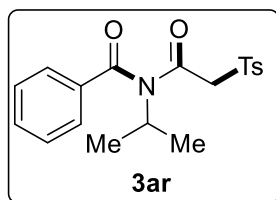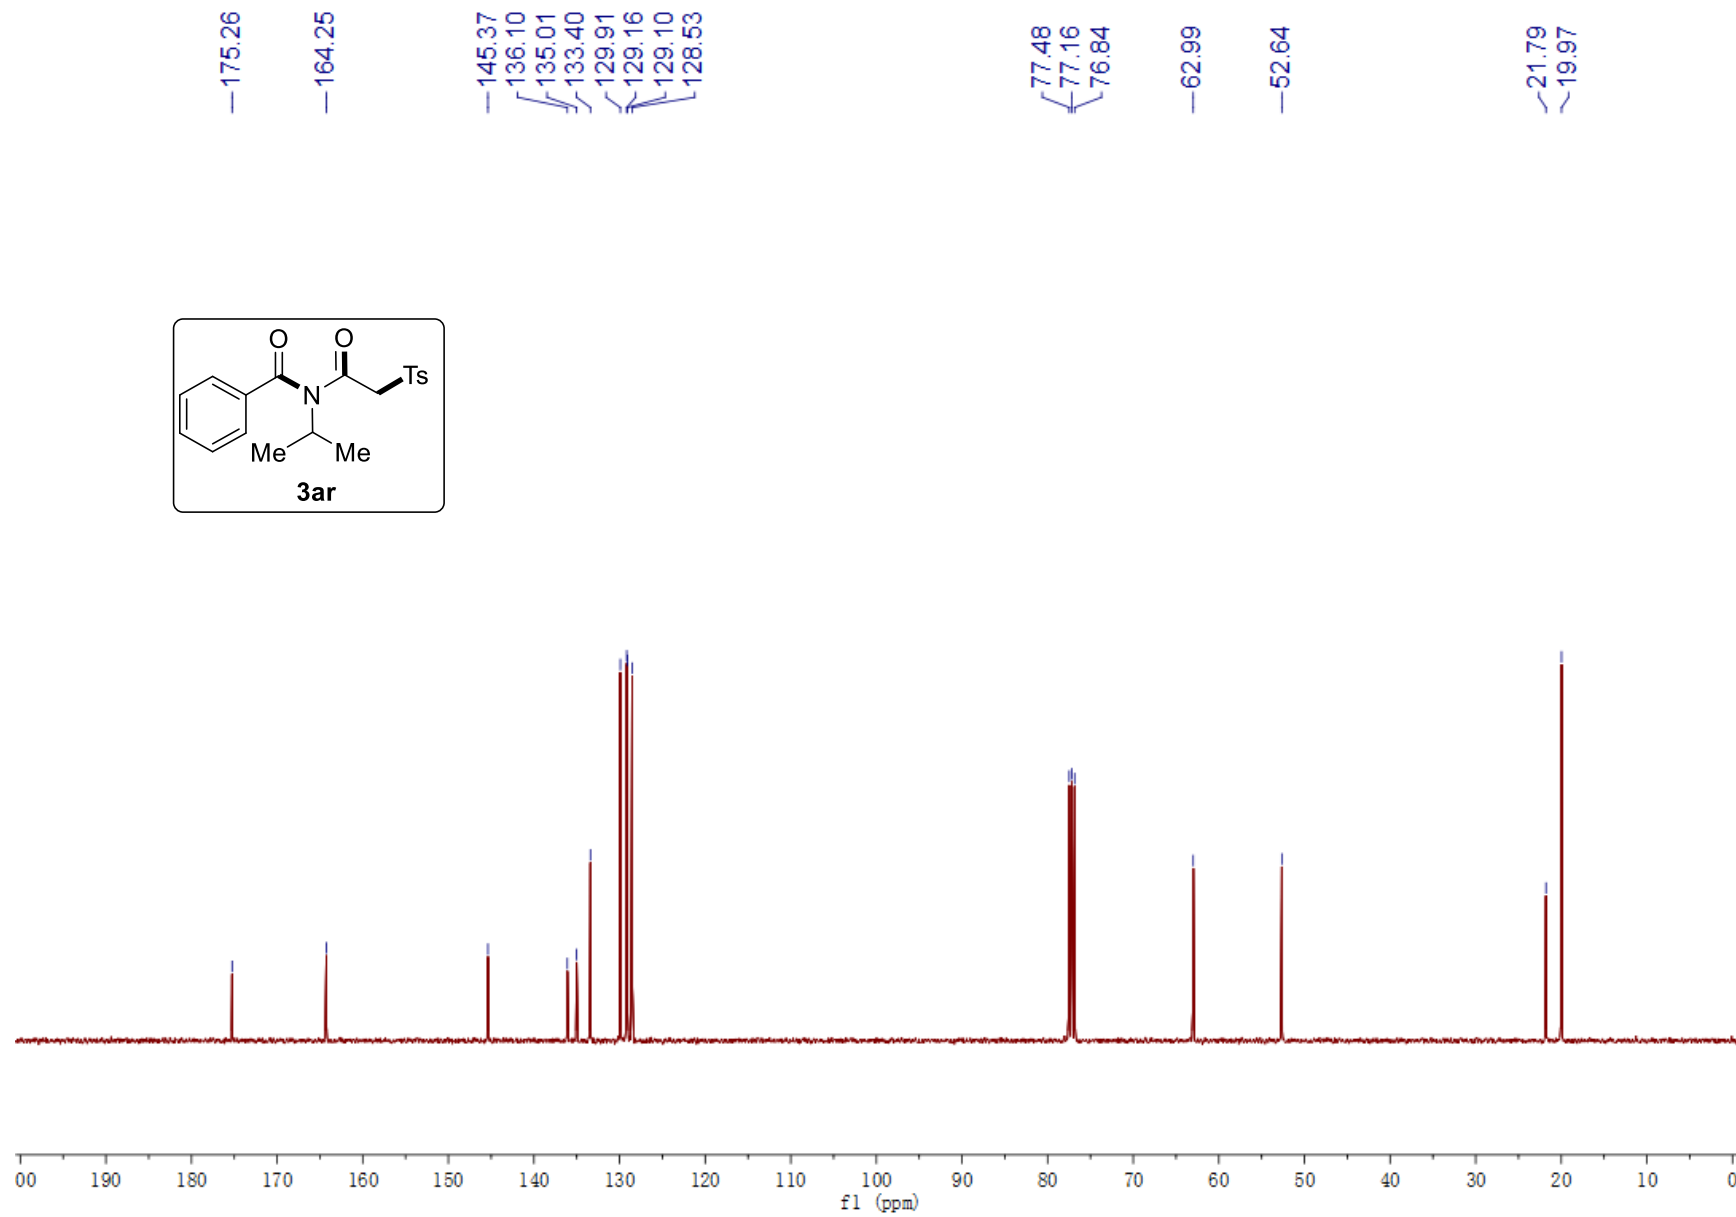

S147

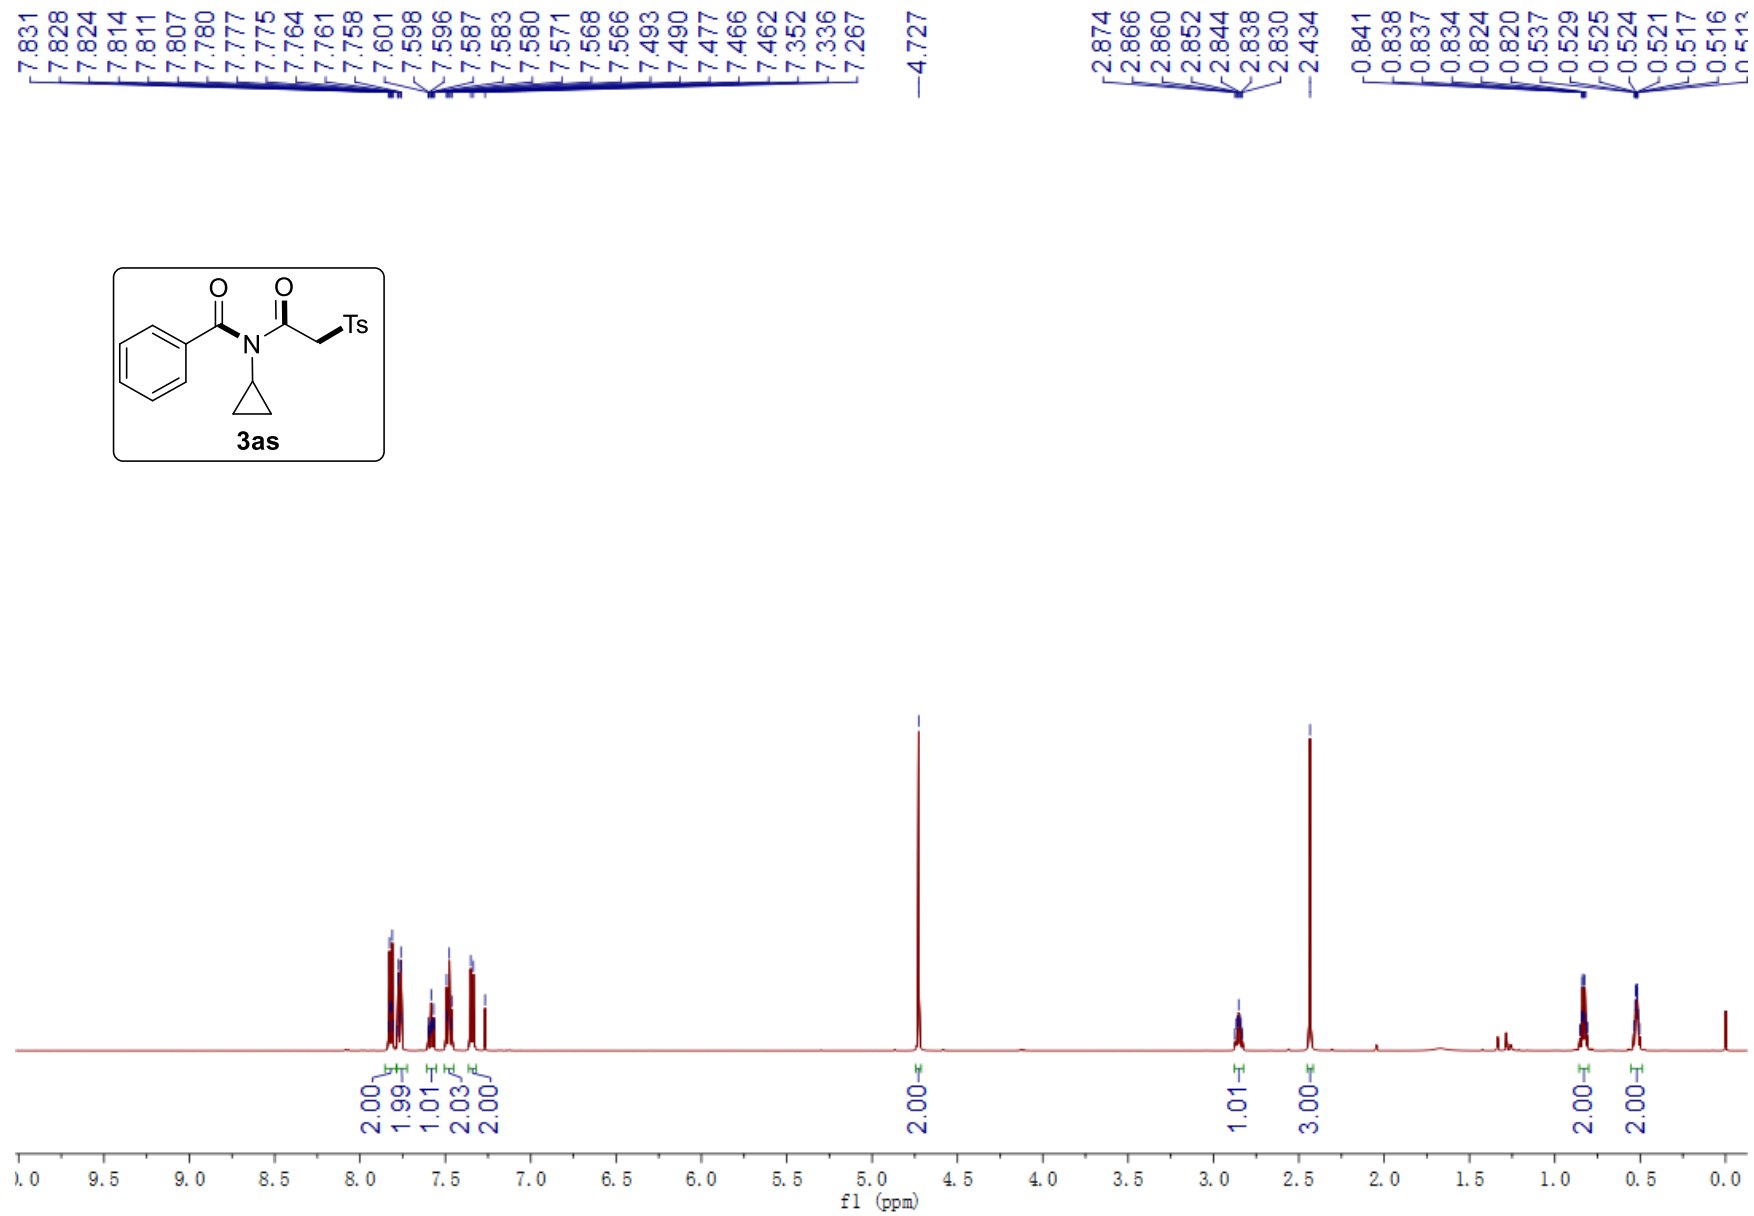

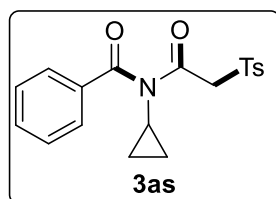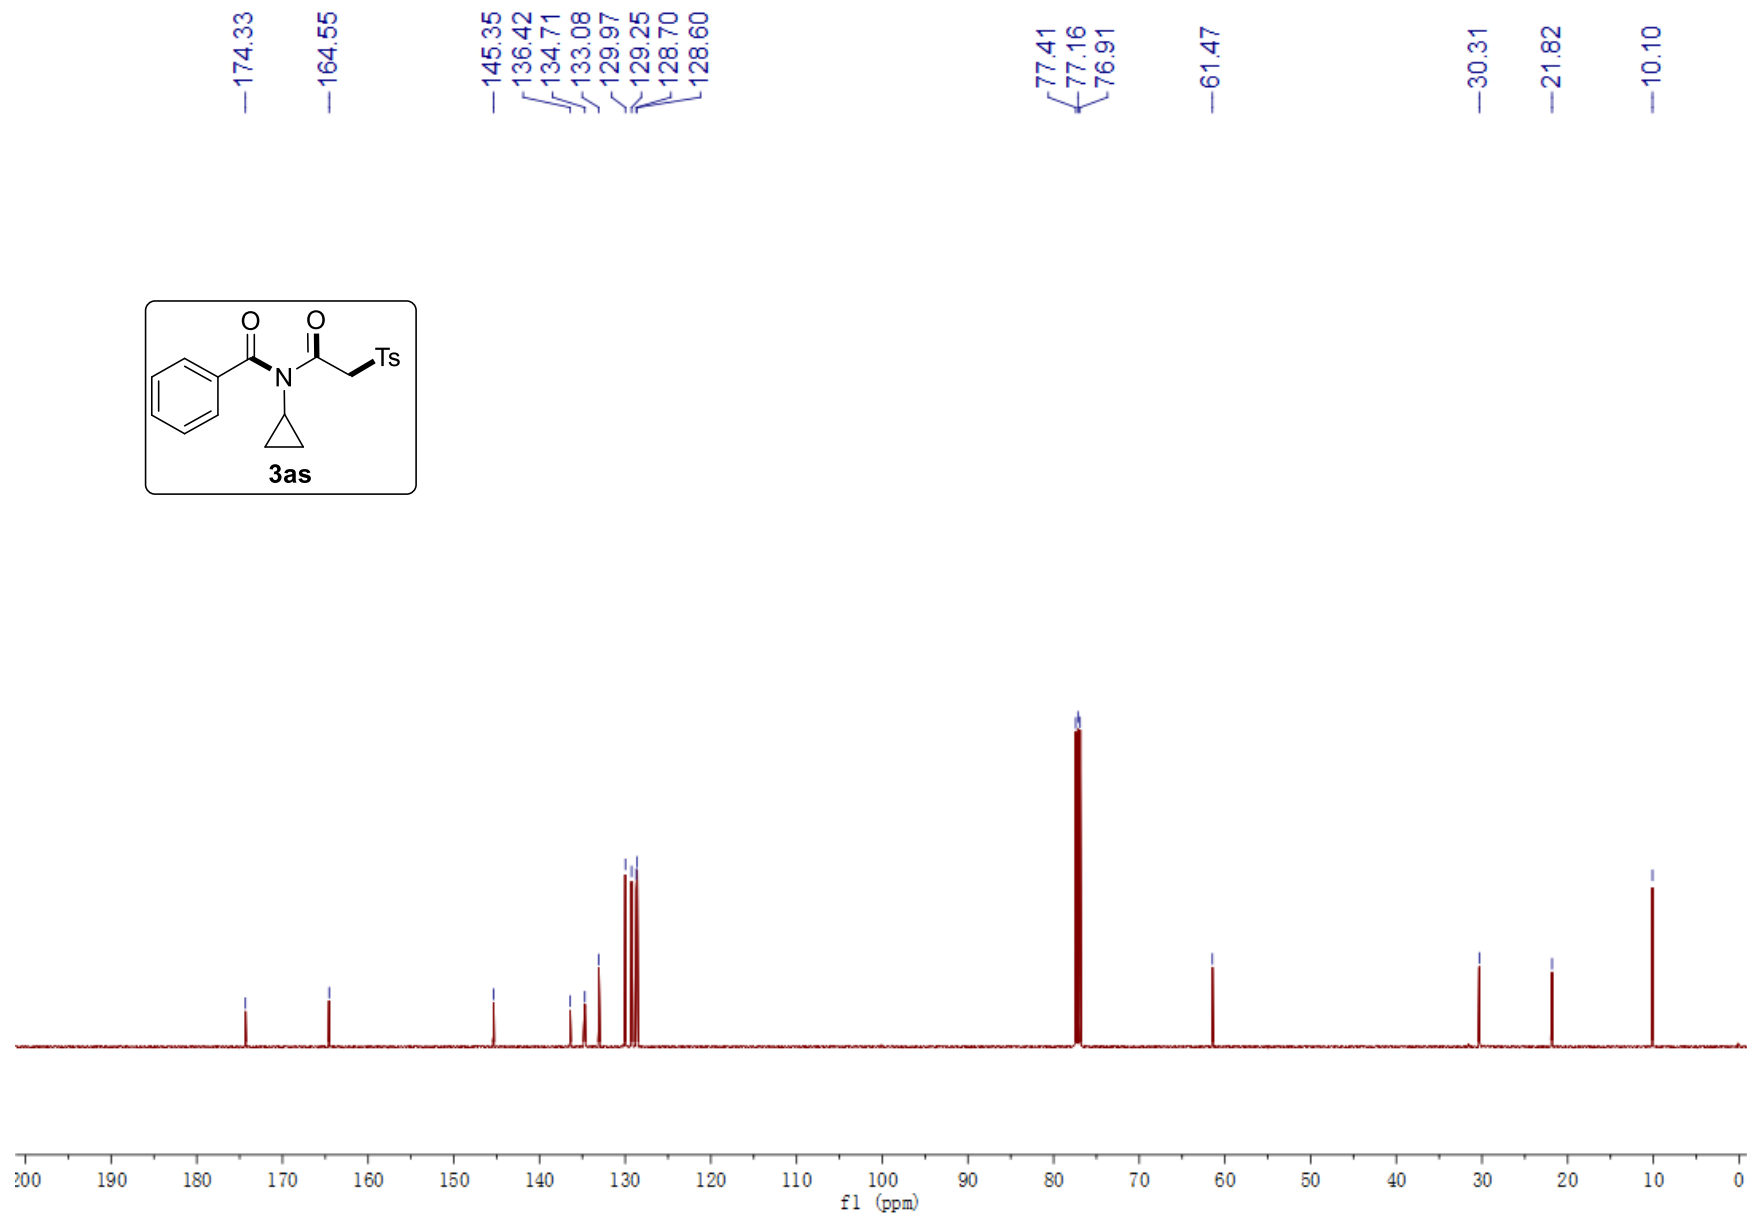

S149

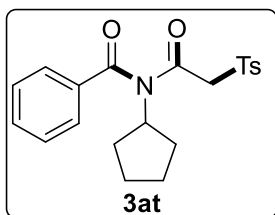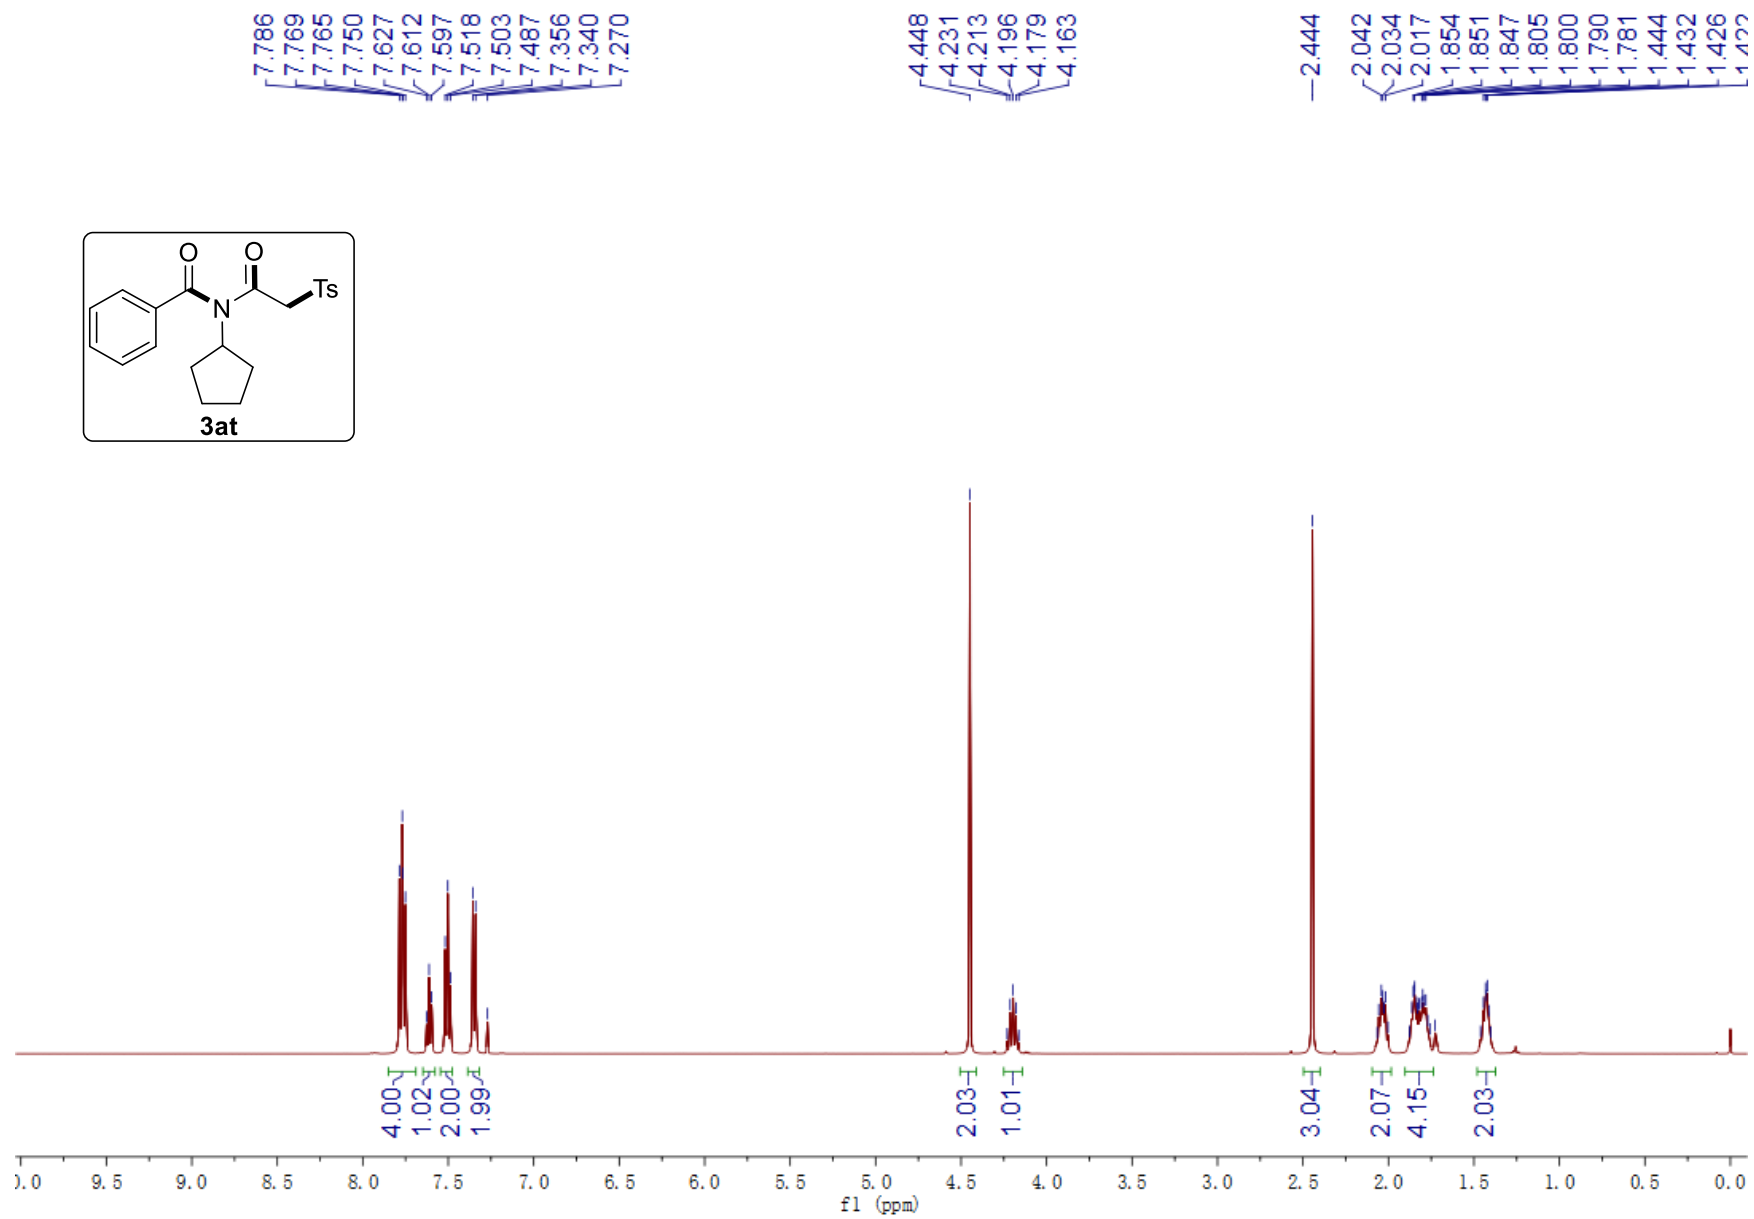

S150

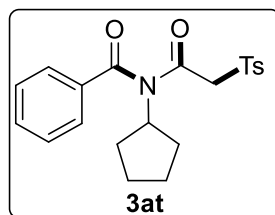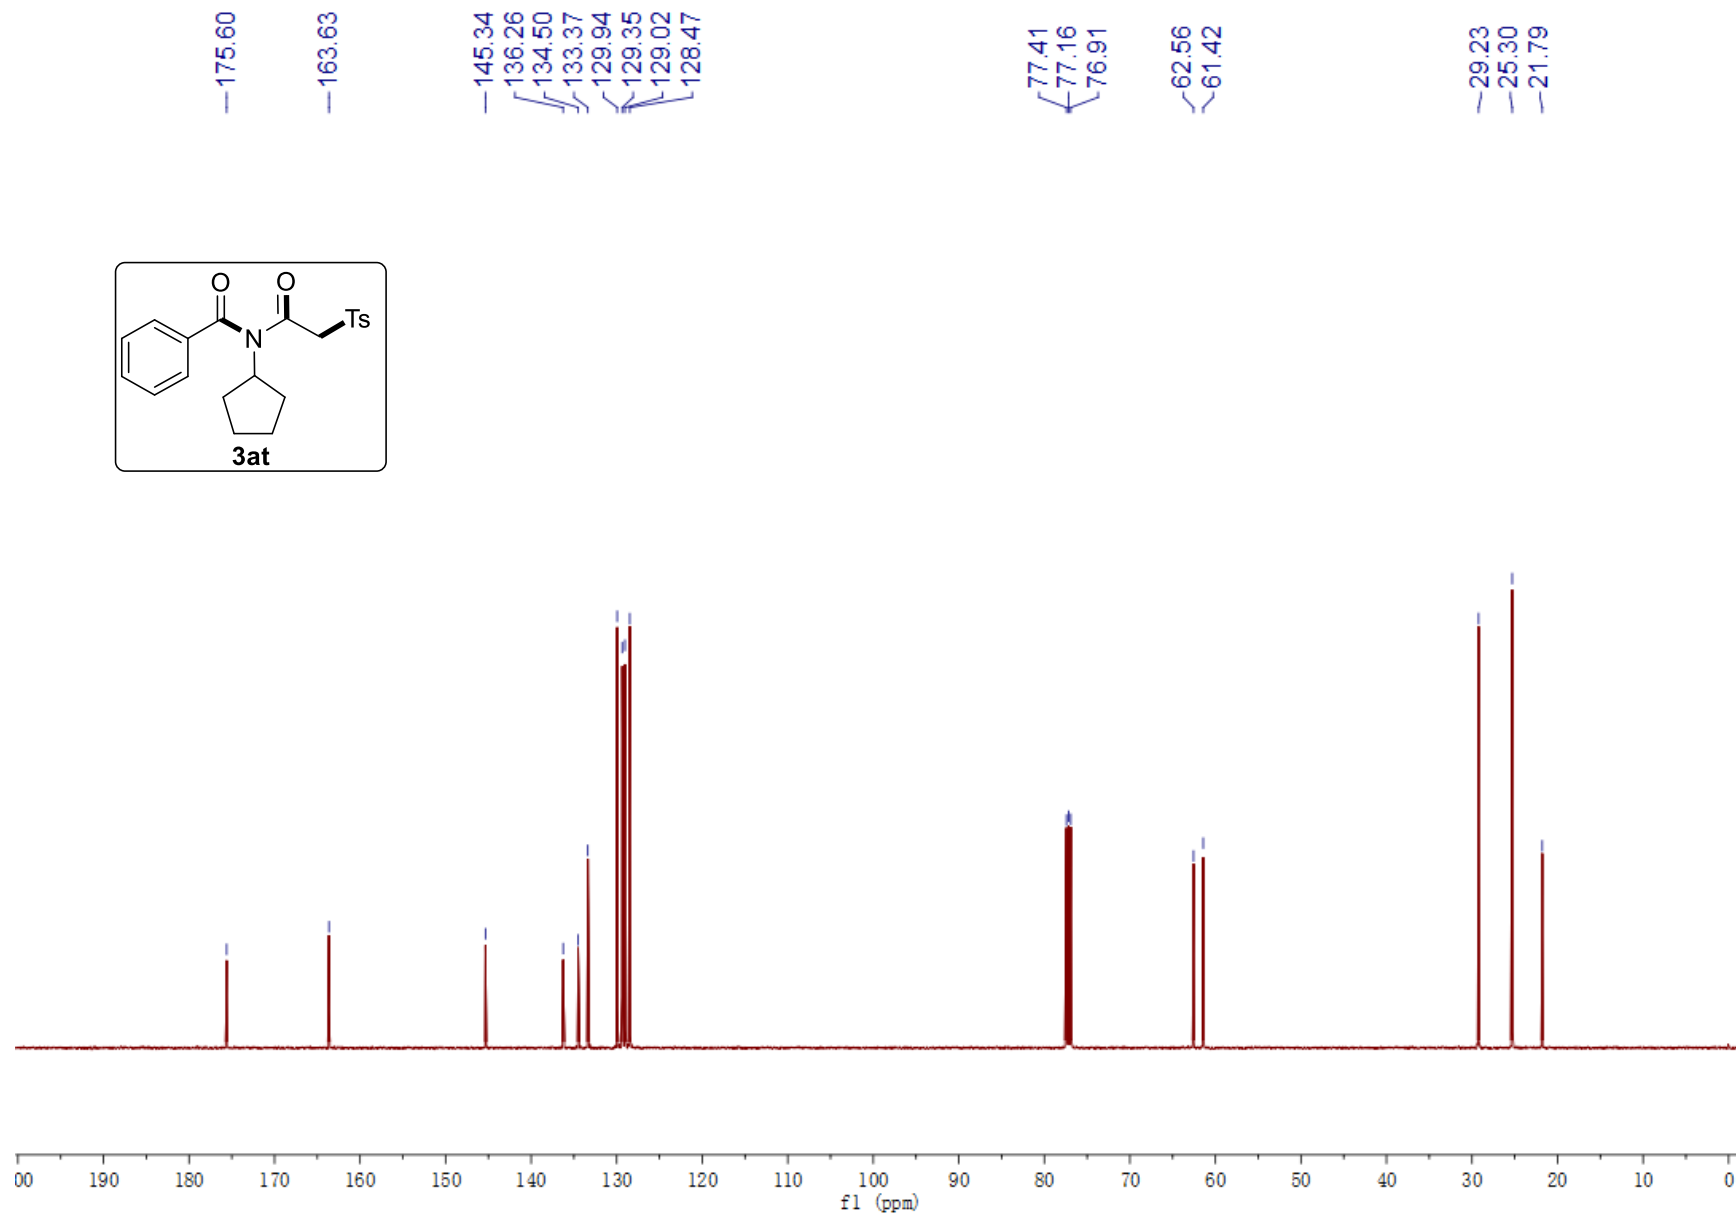

S151

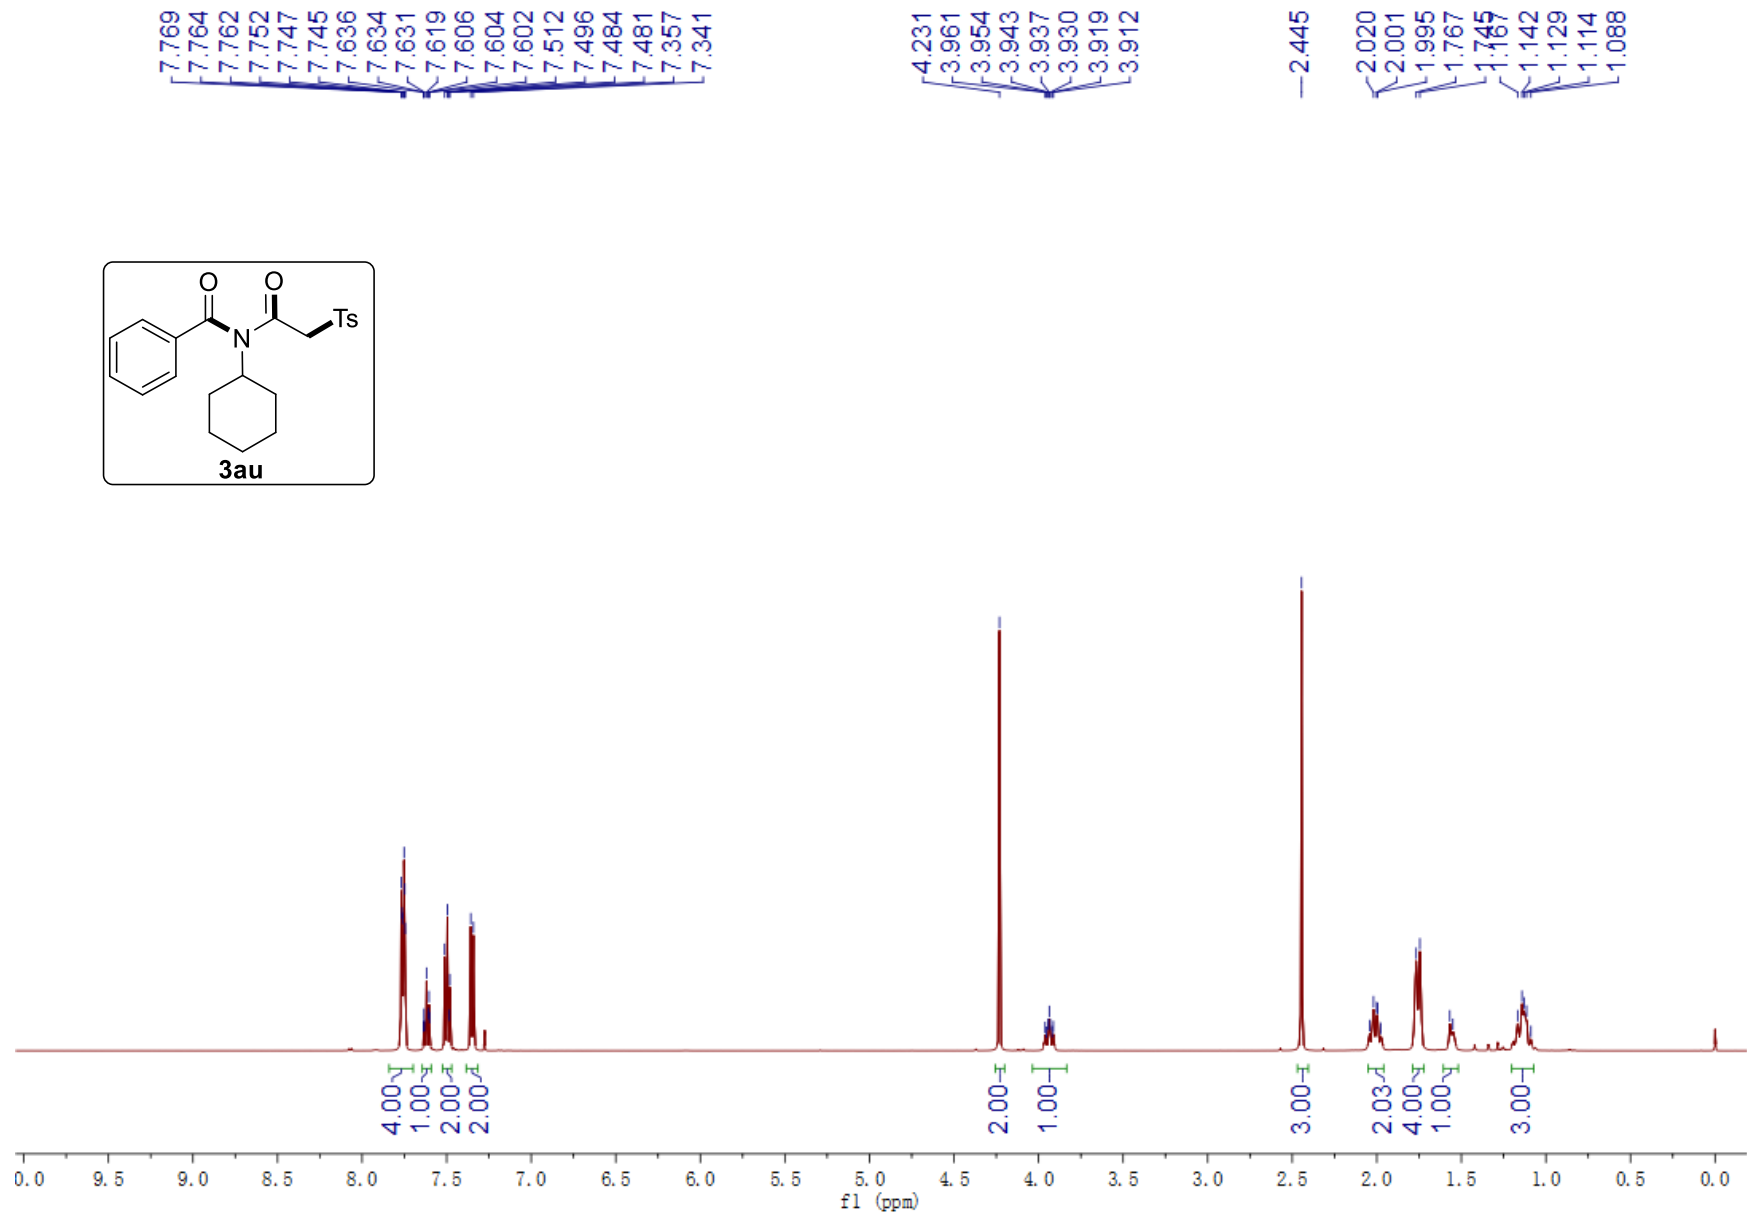

S152



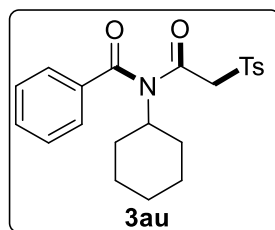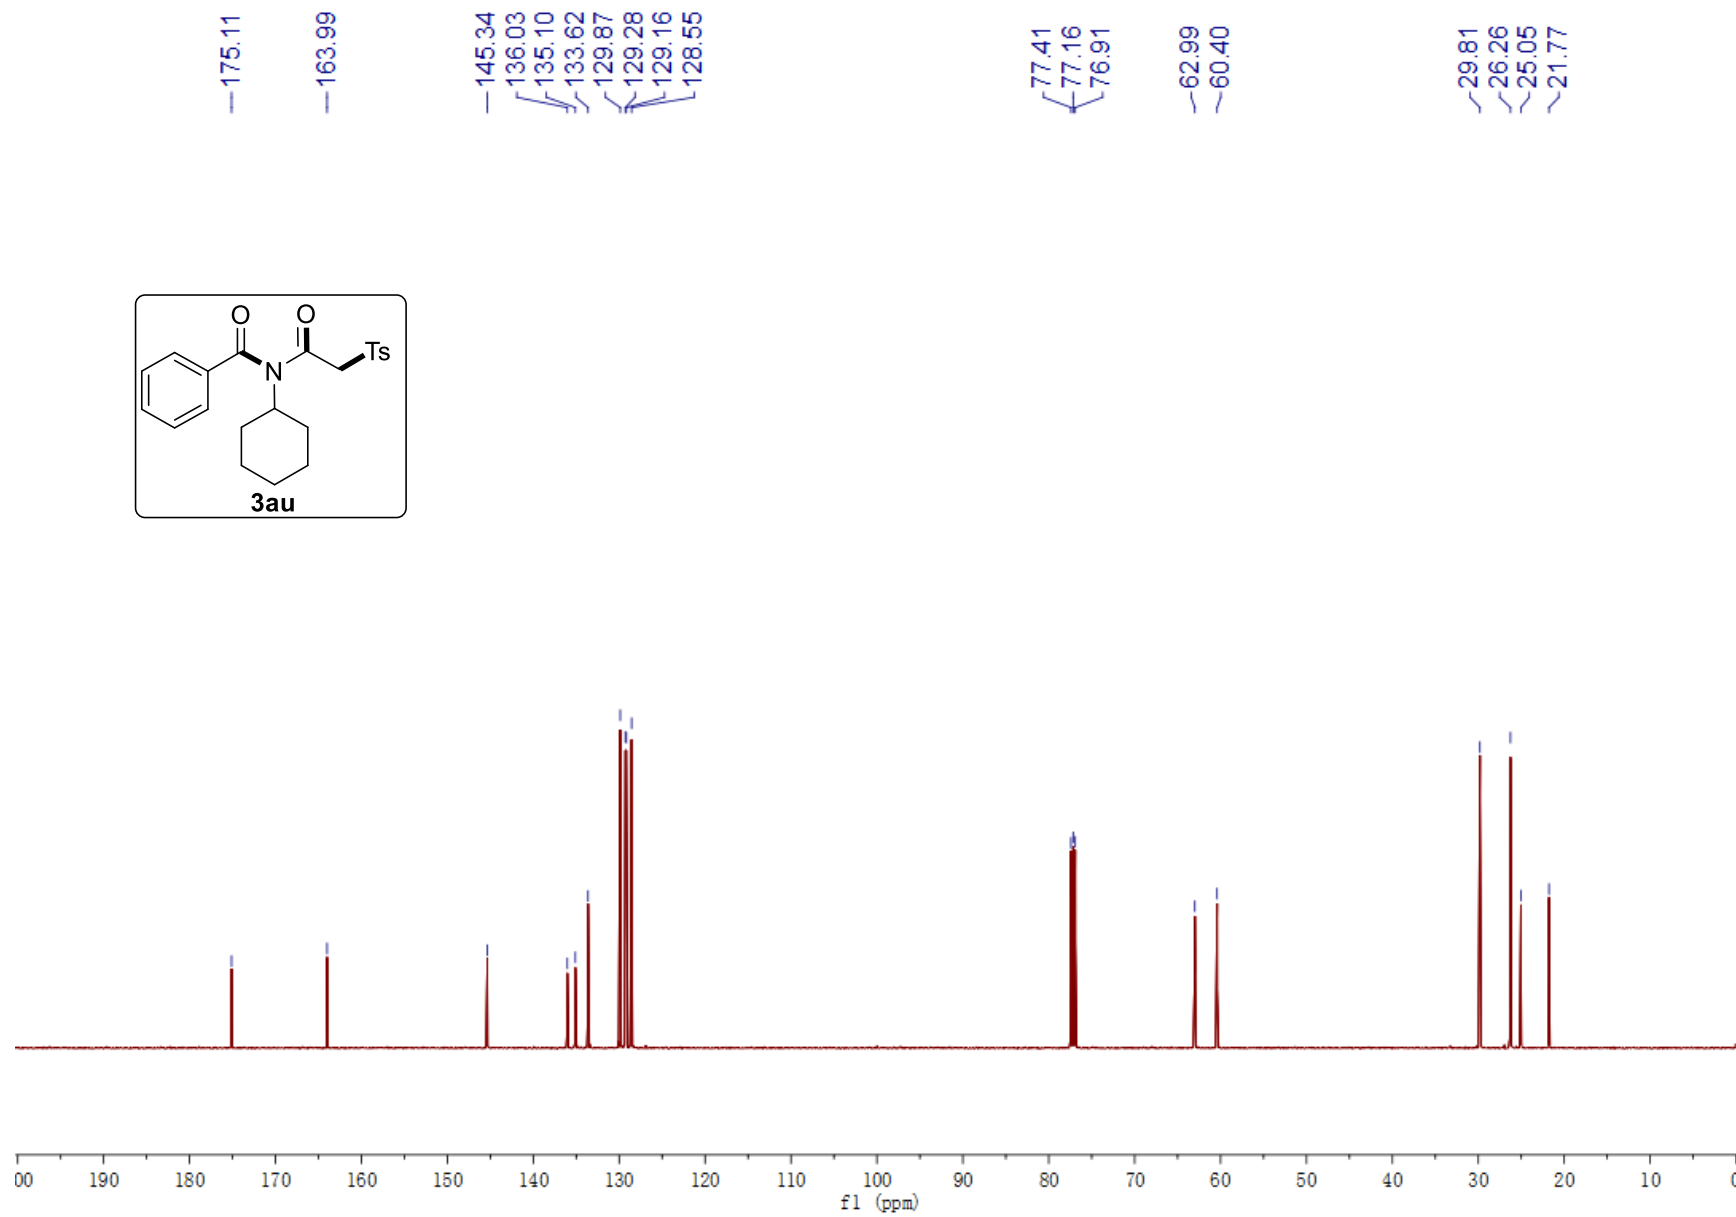

S153

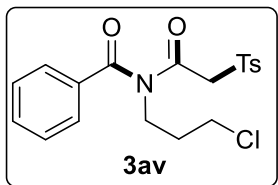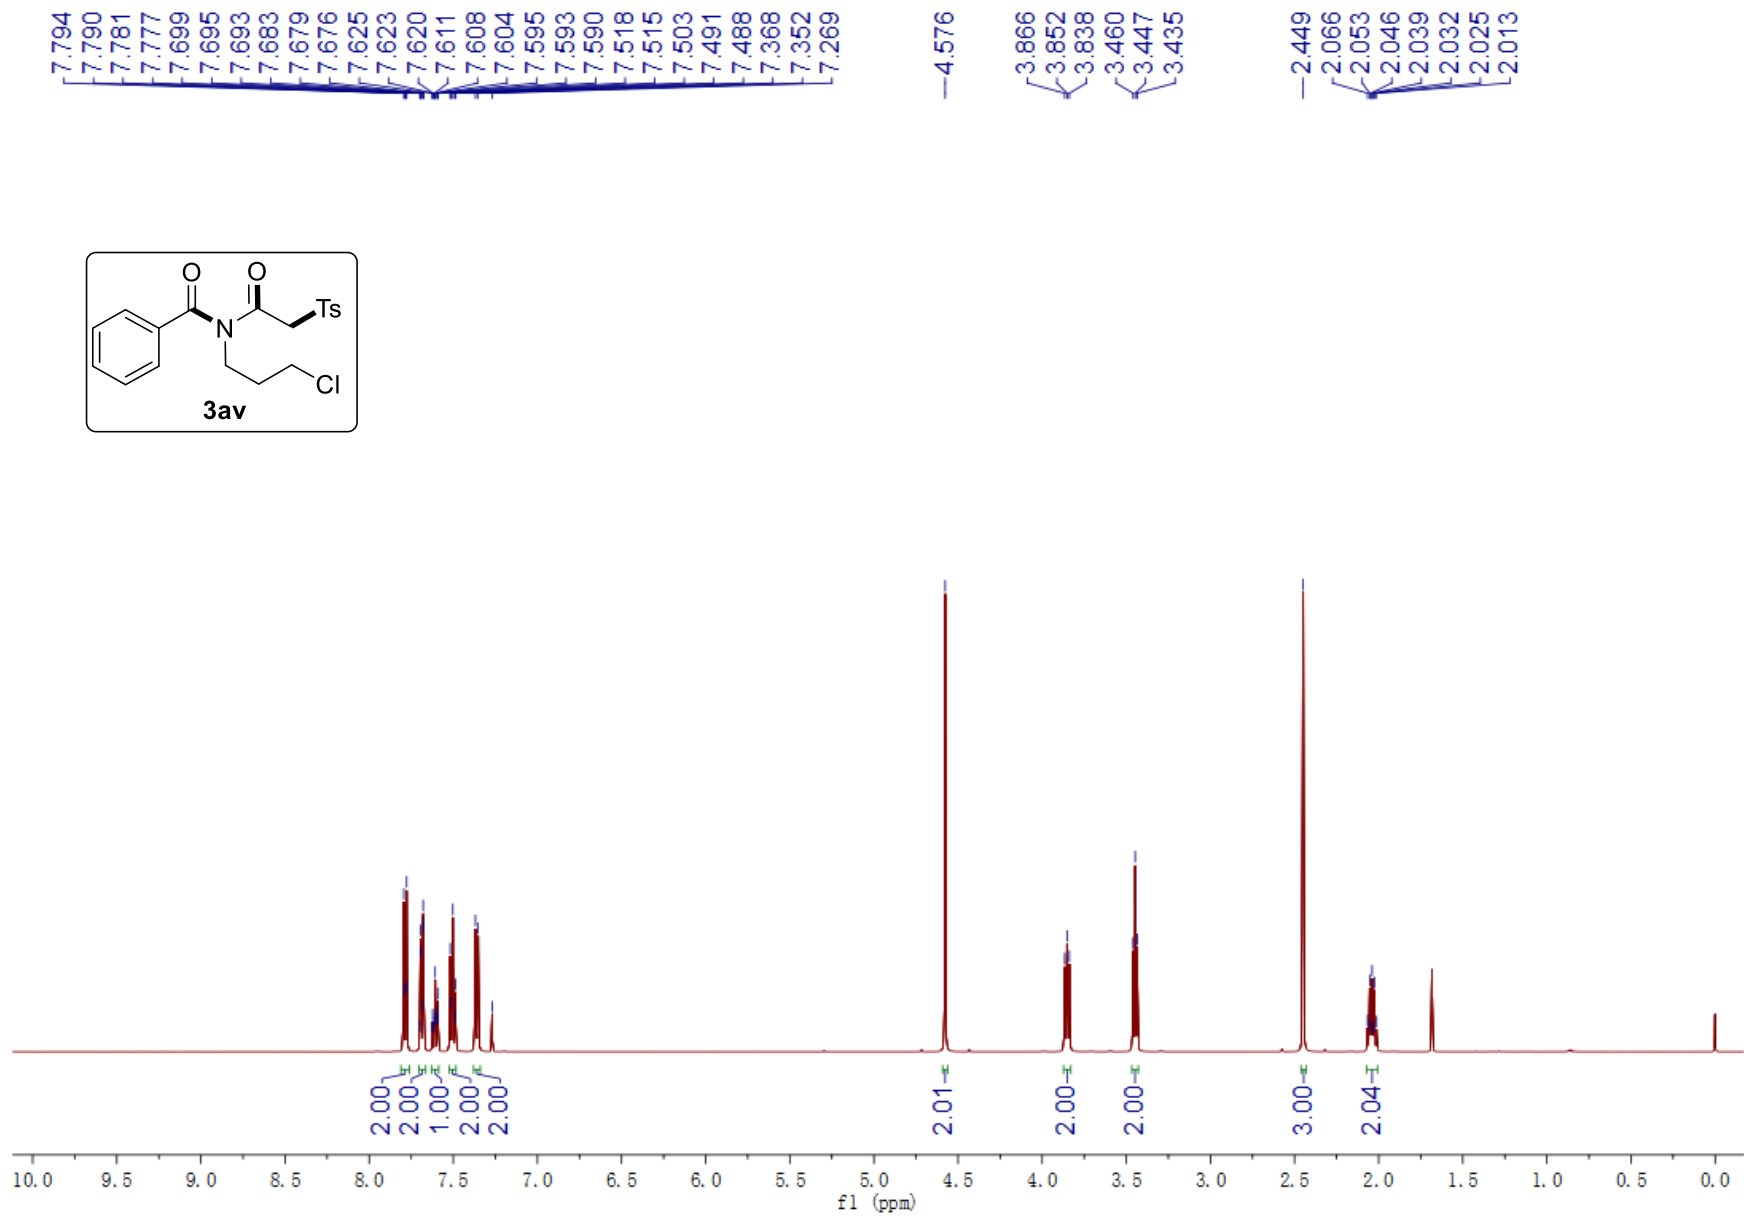

S154

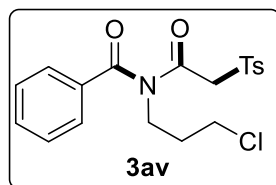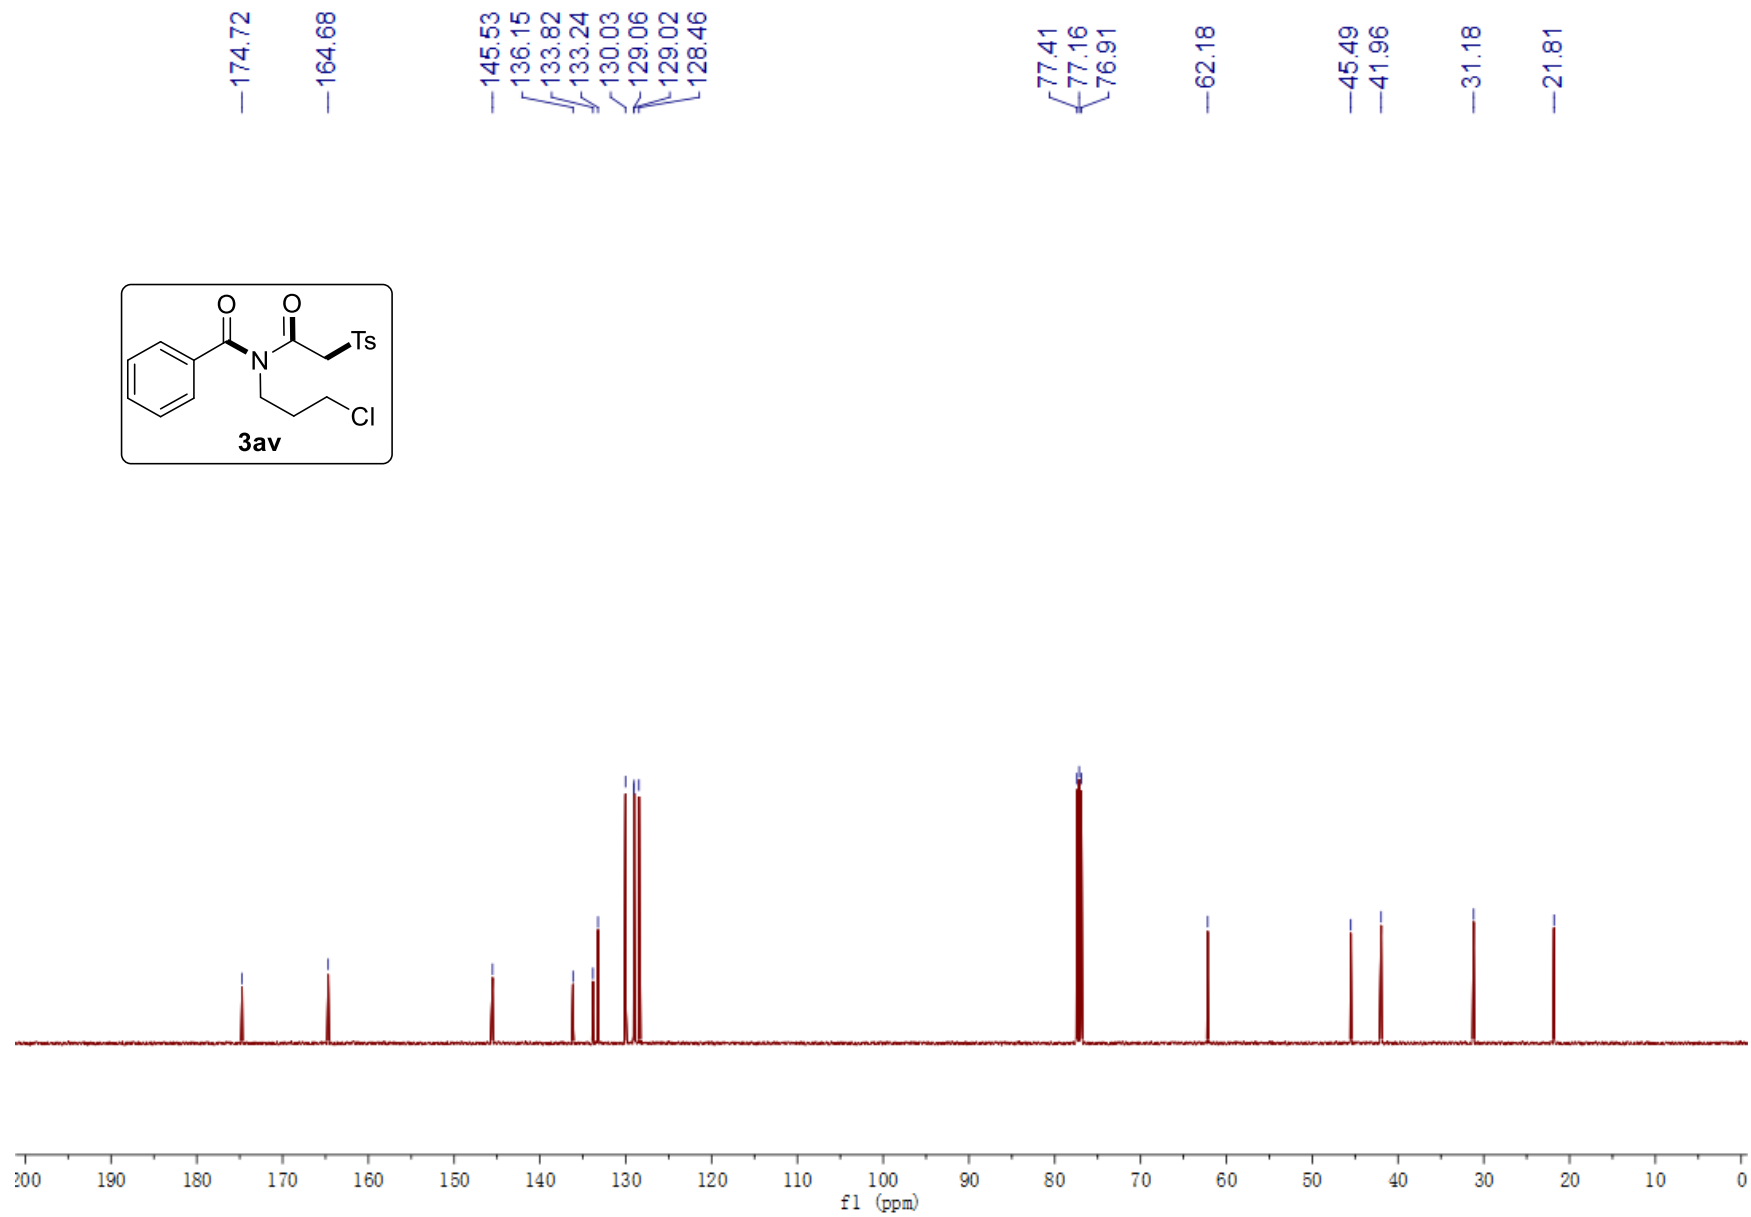

S155



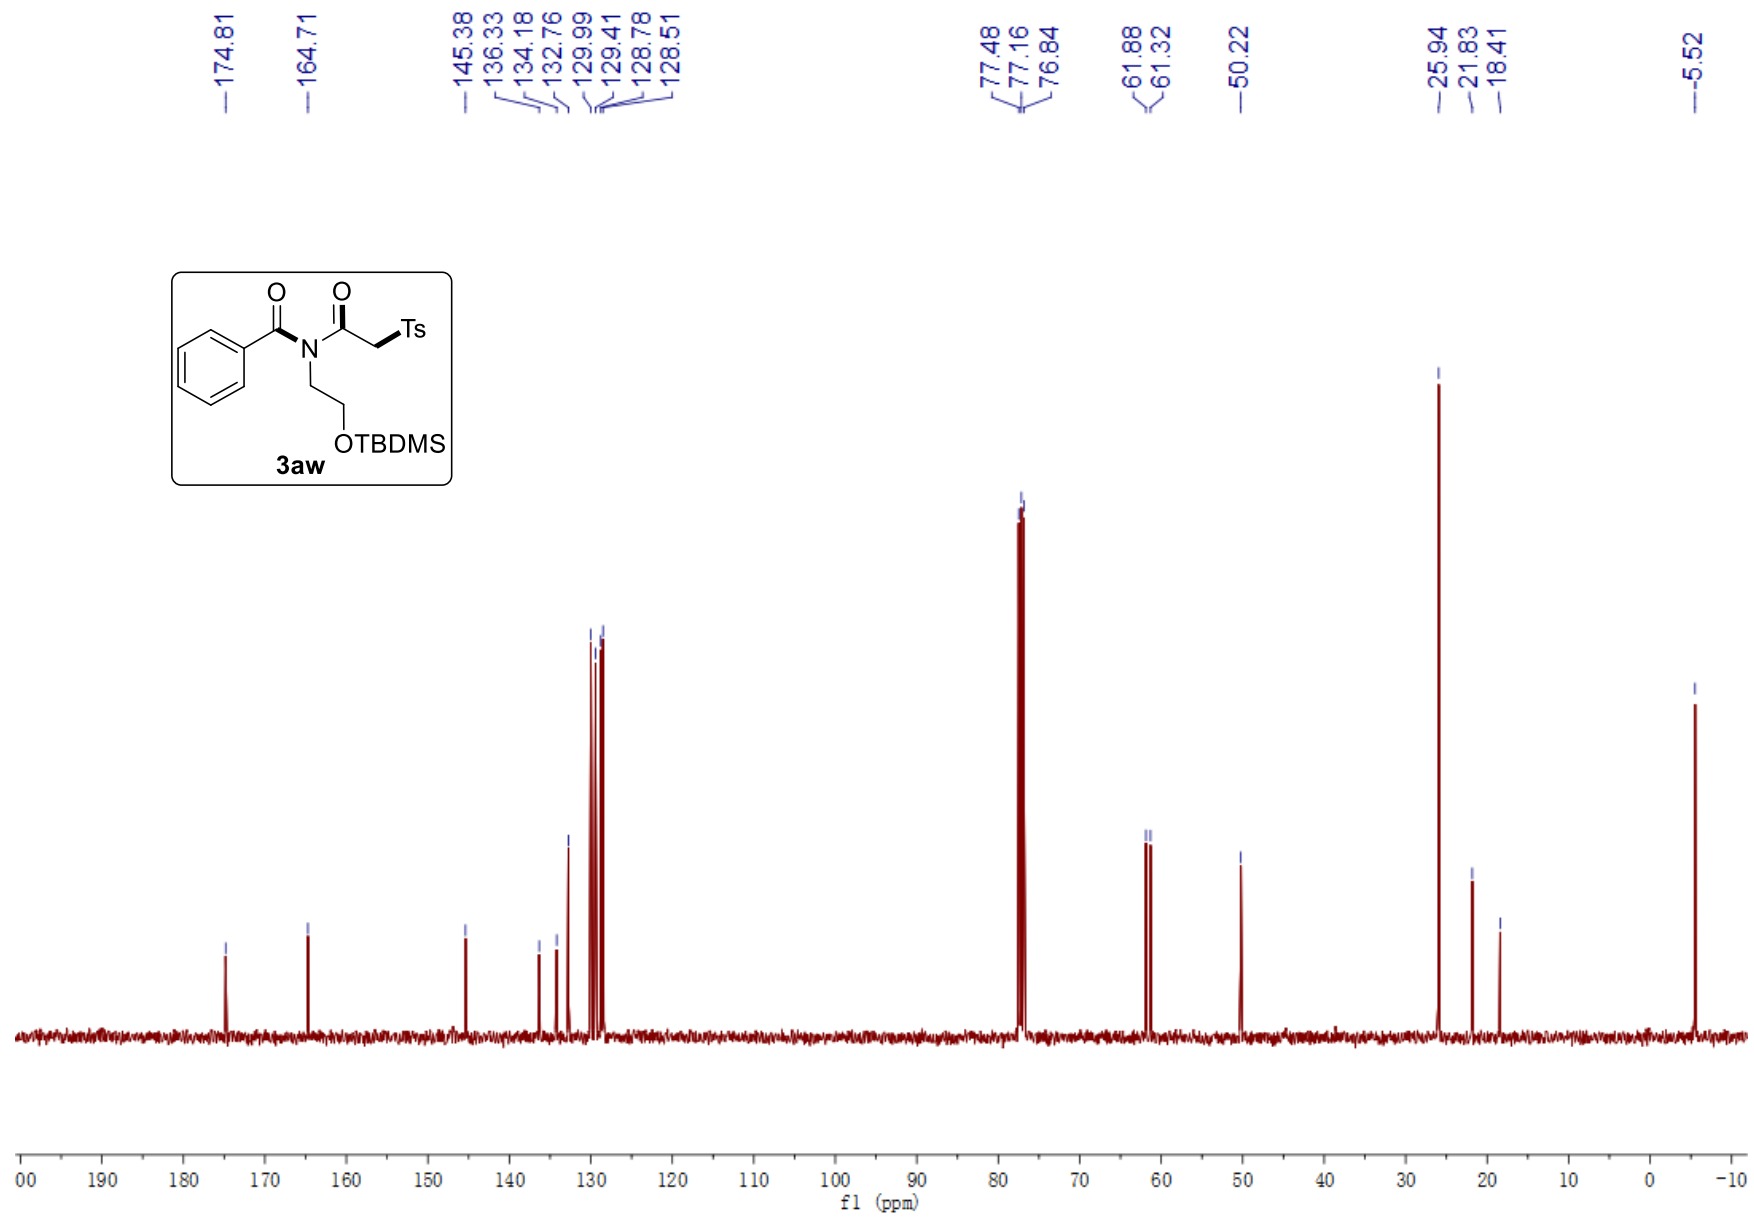

S157

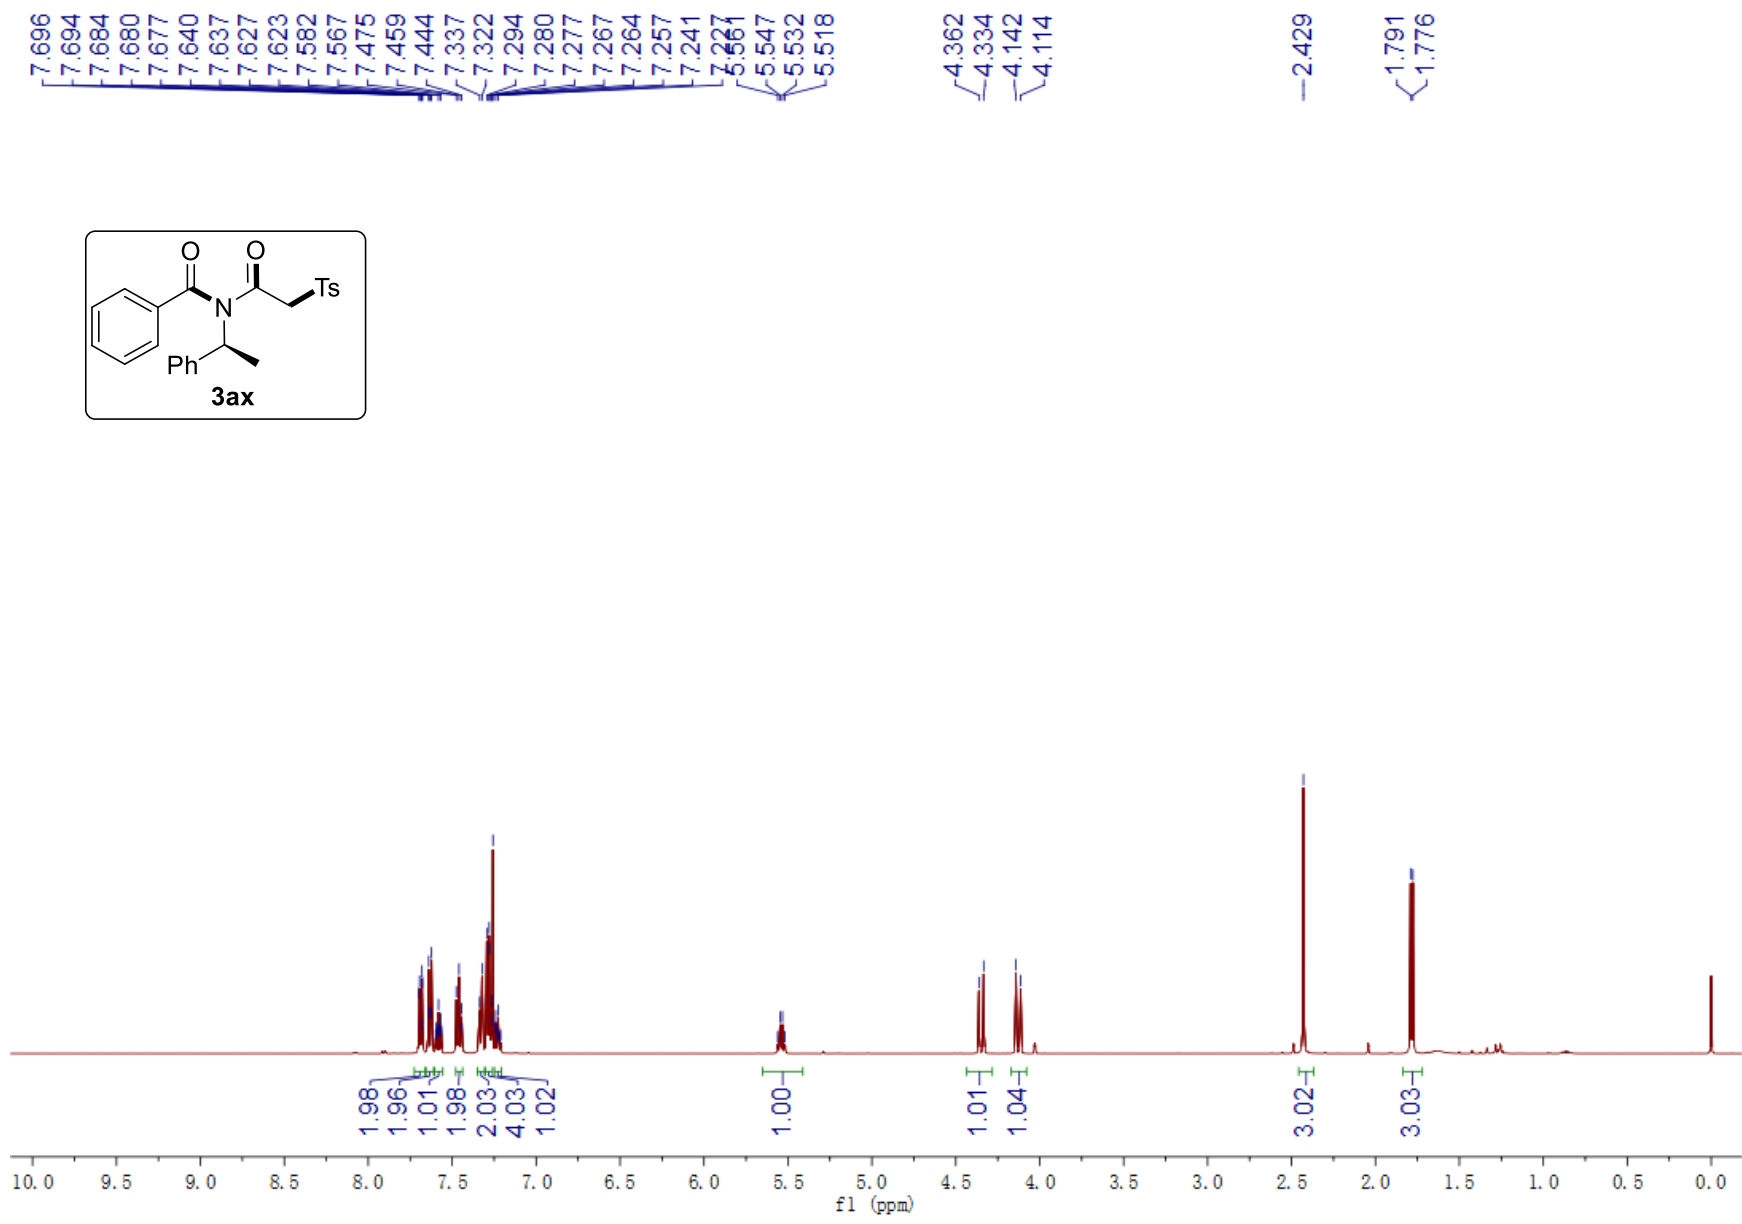

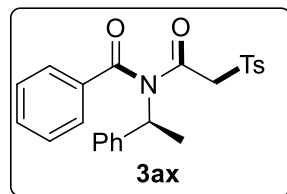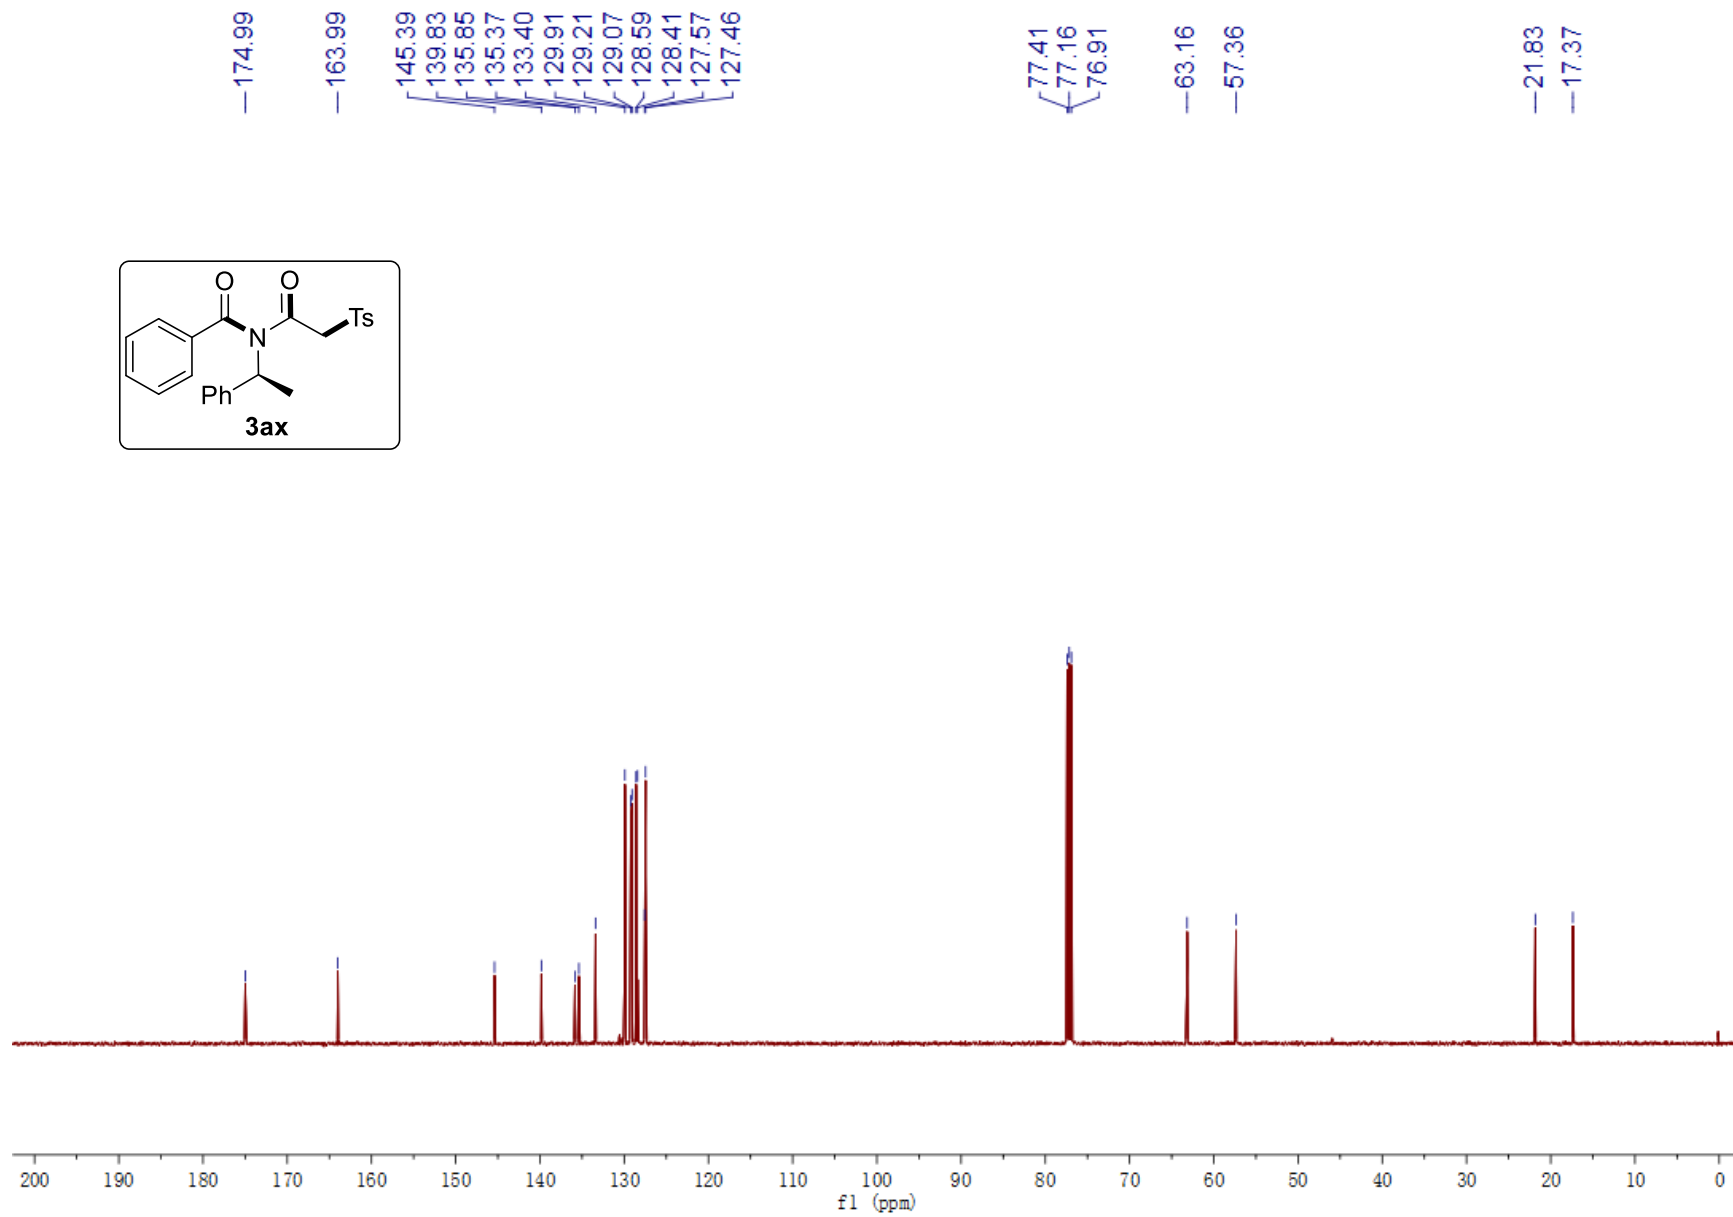

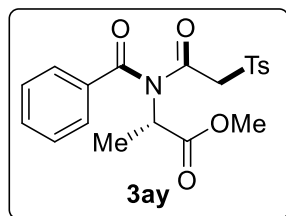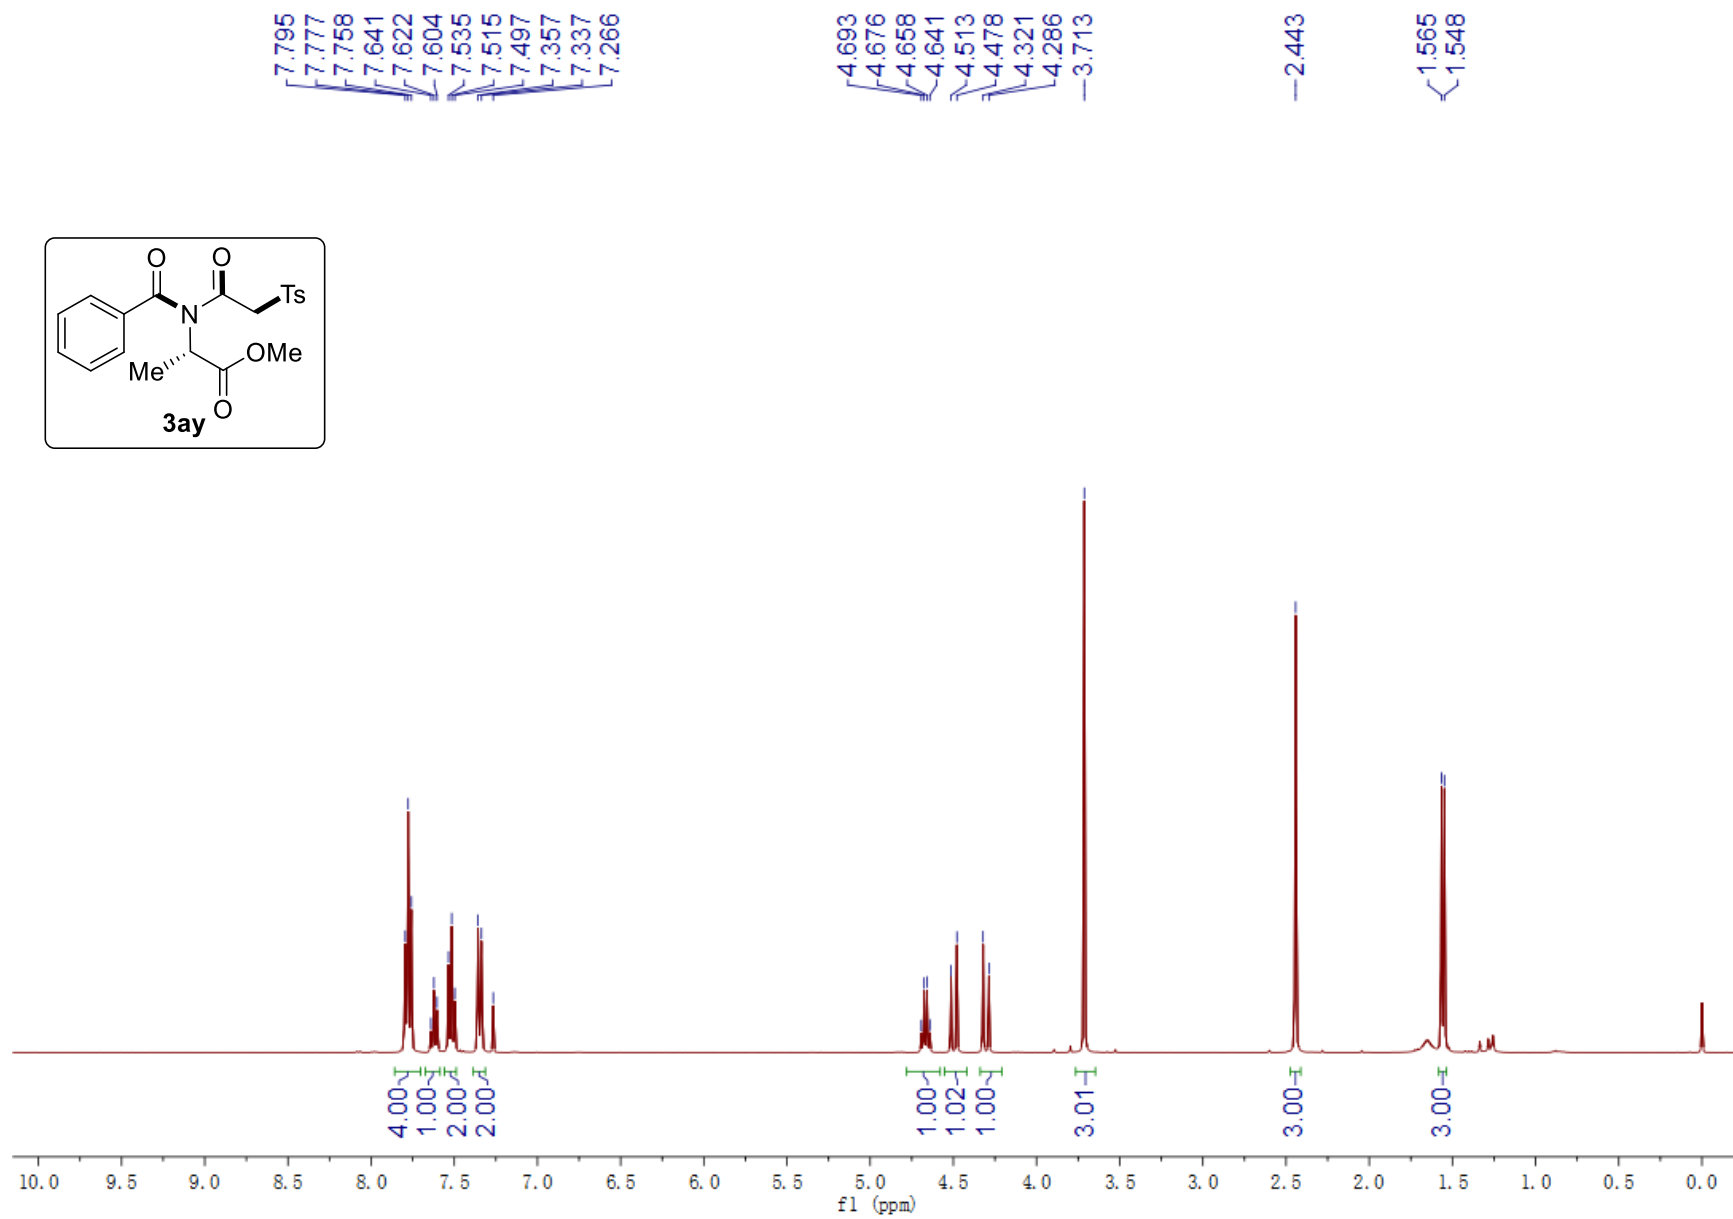

S160



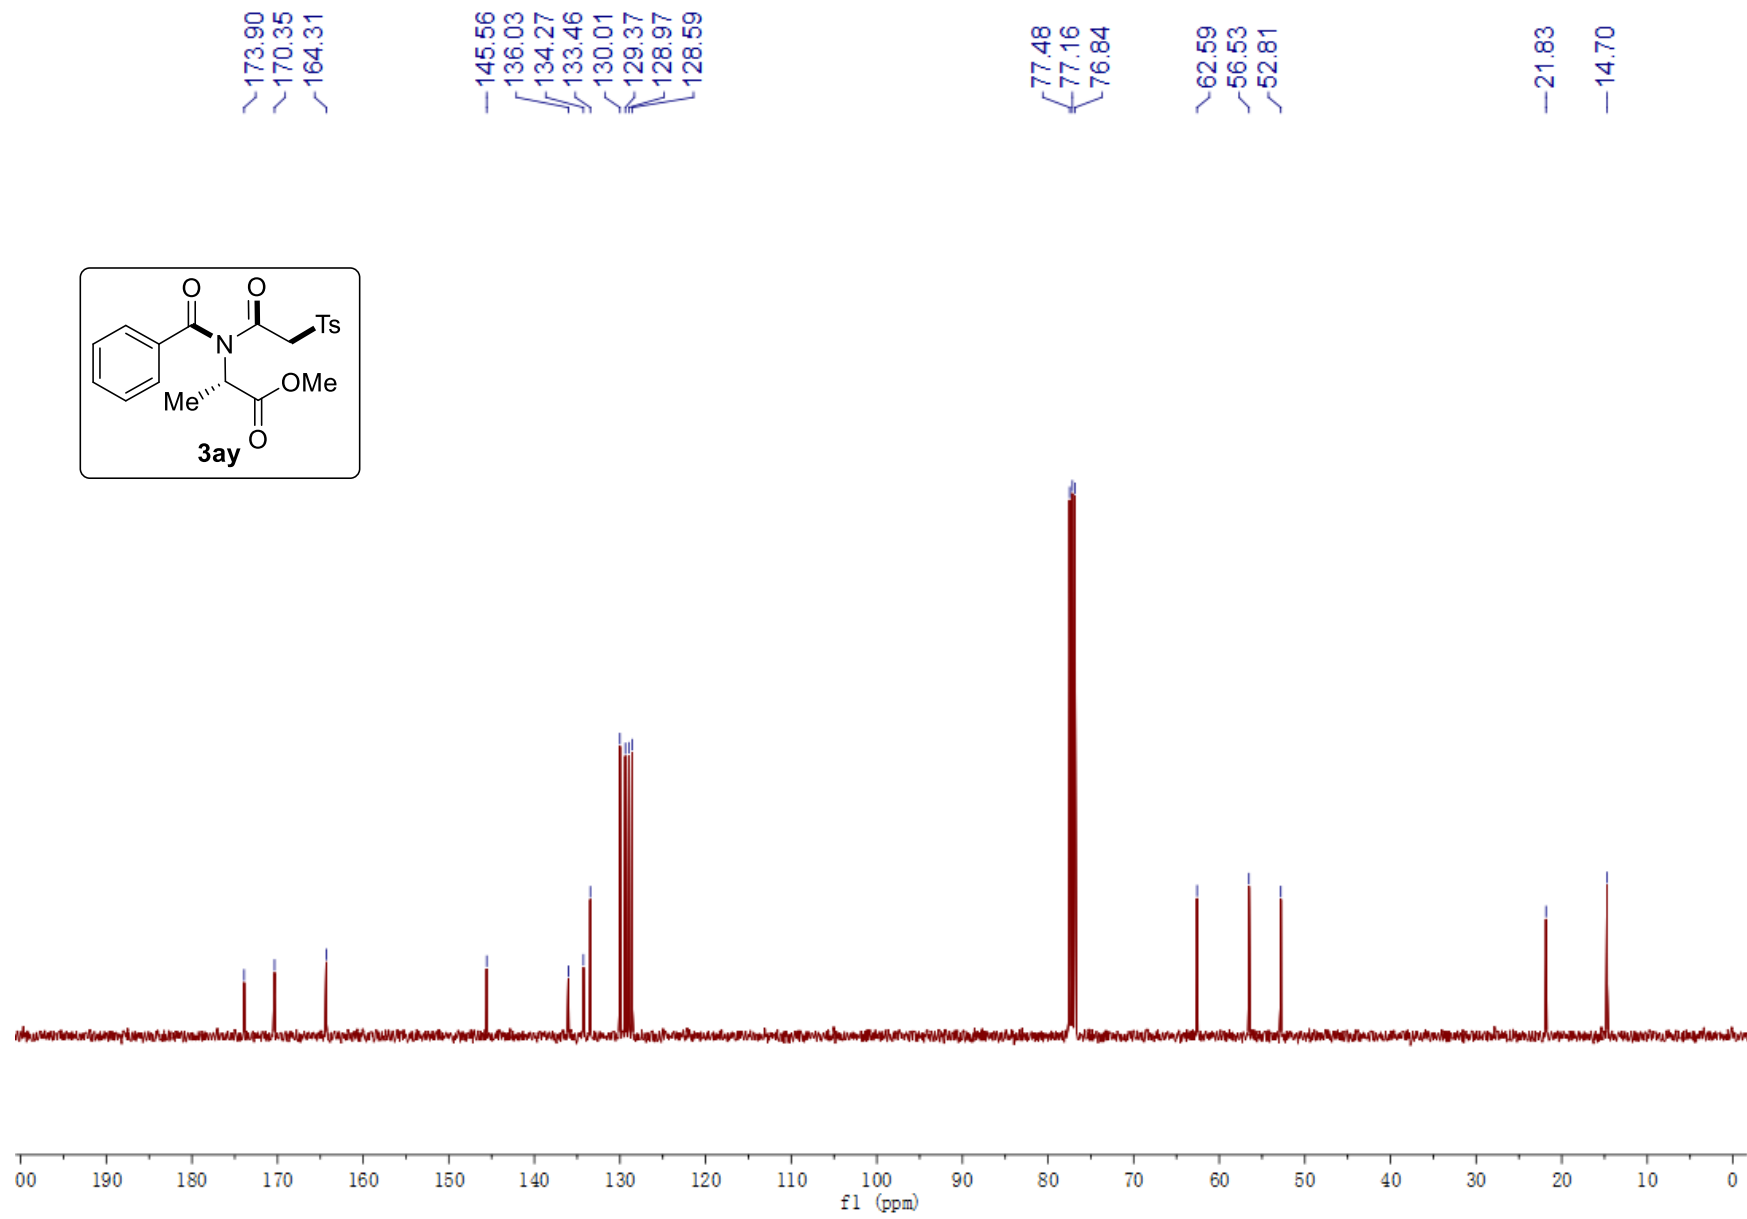

S161

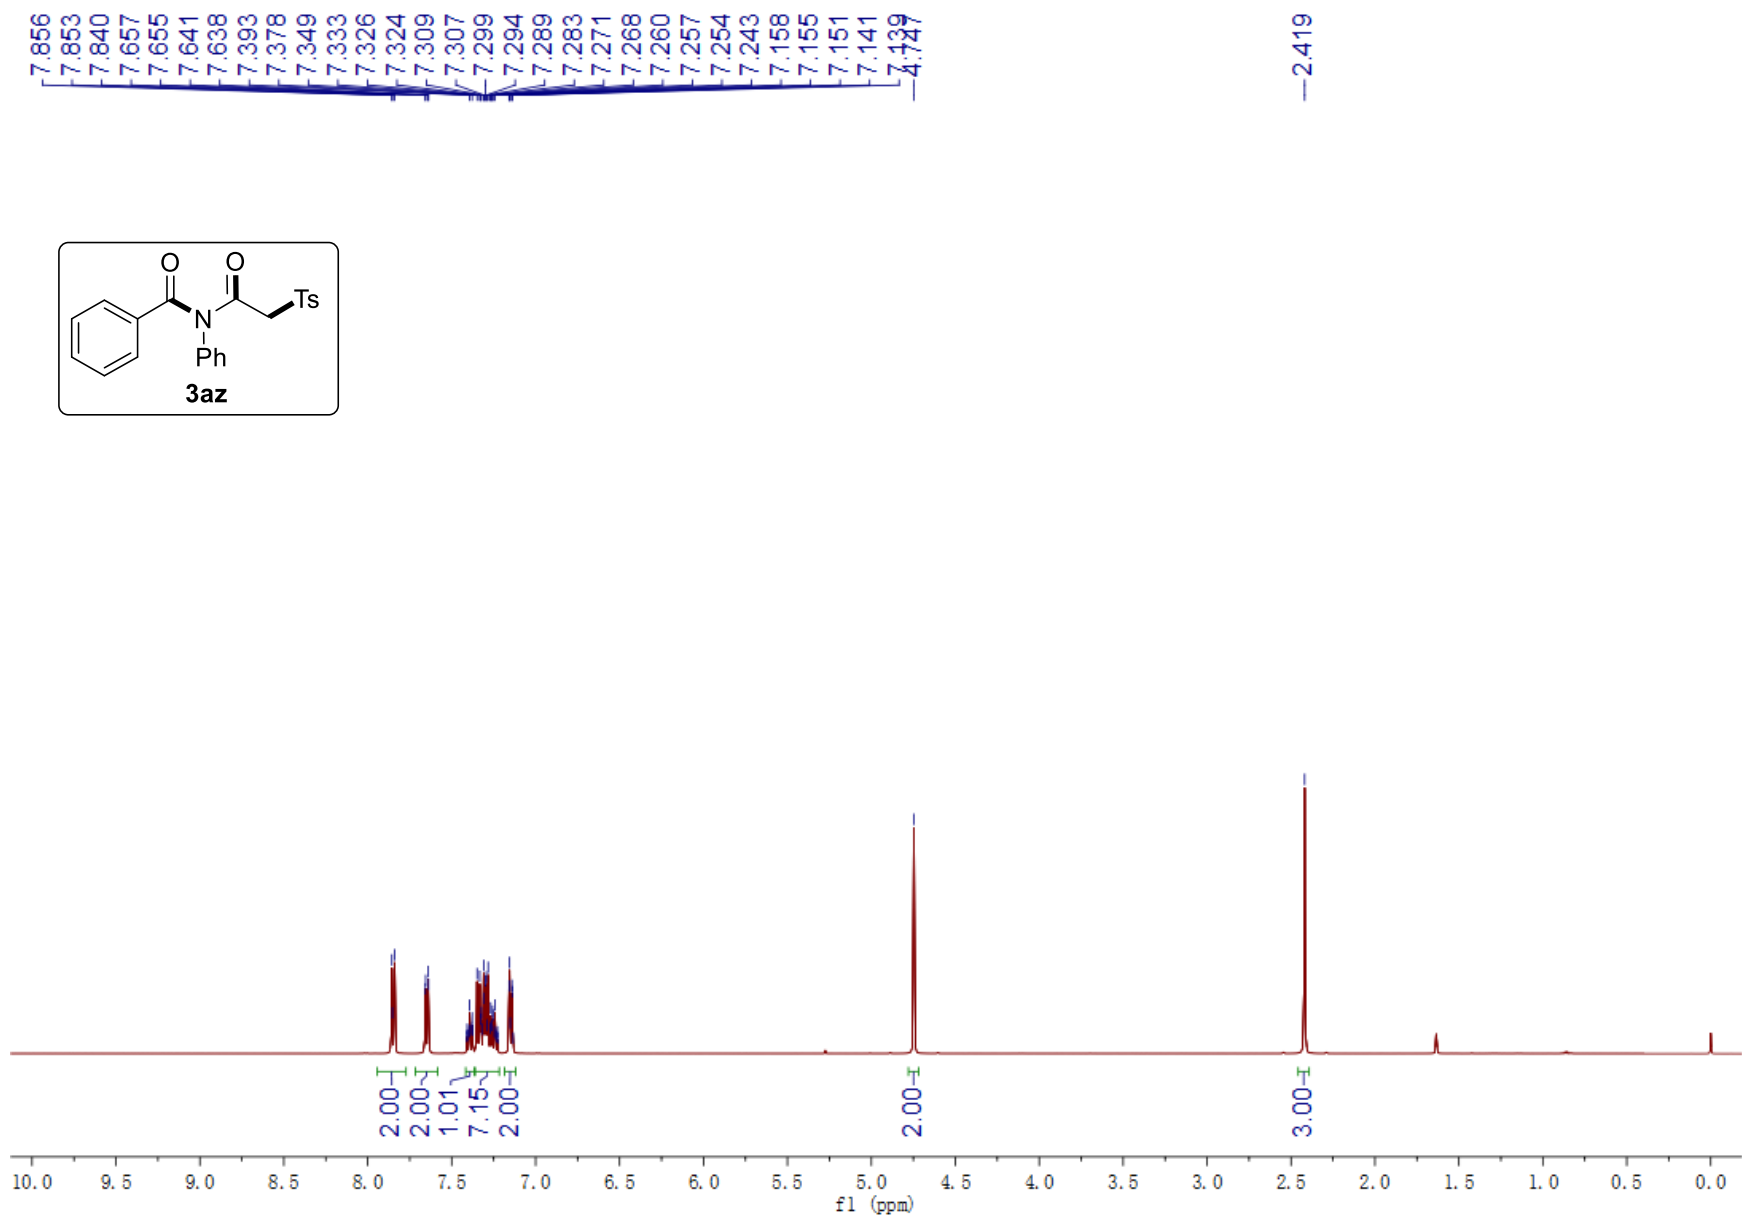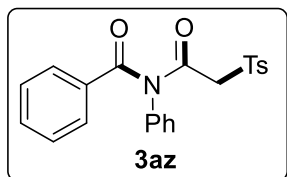

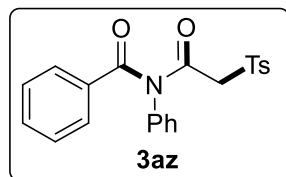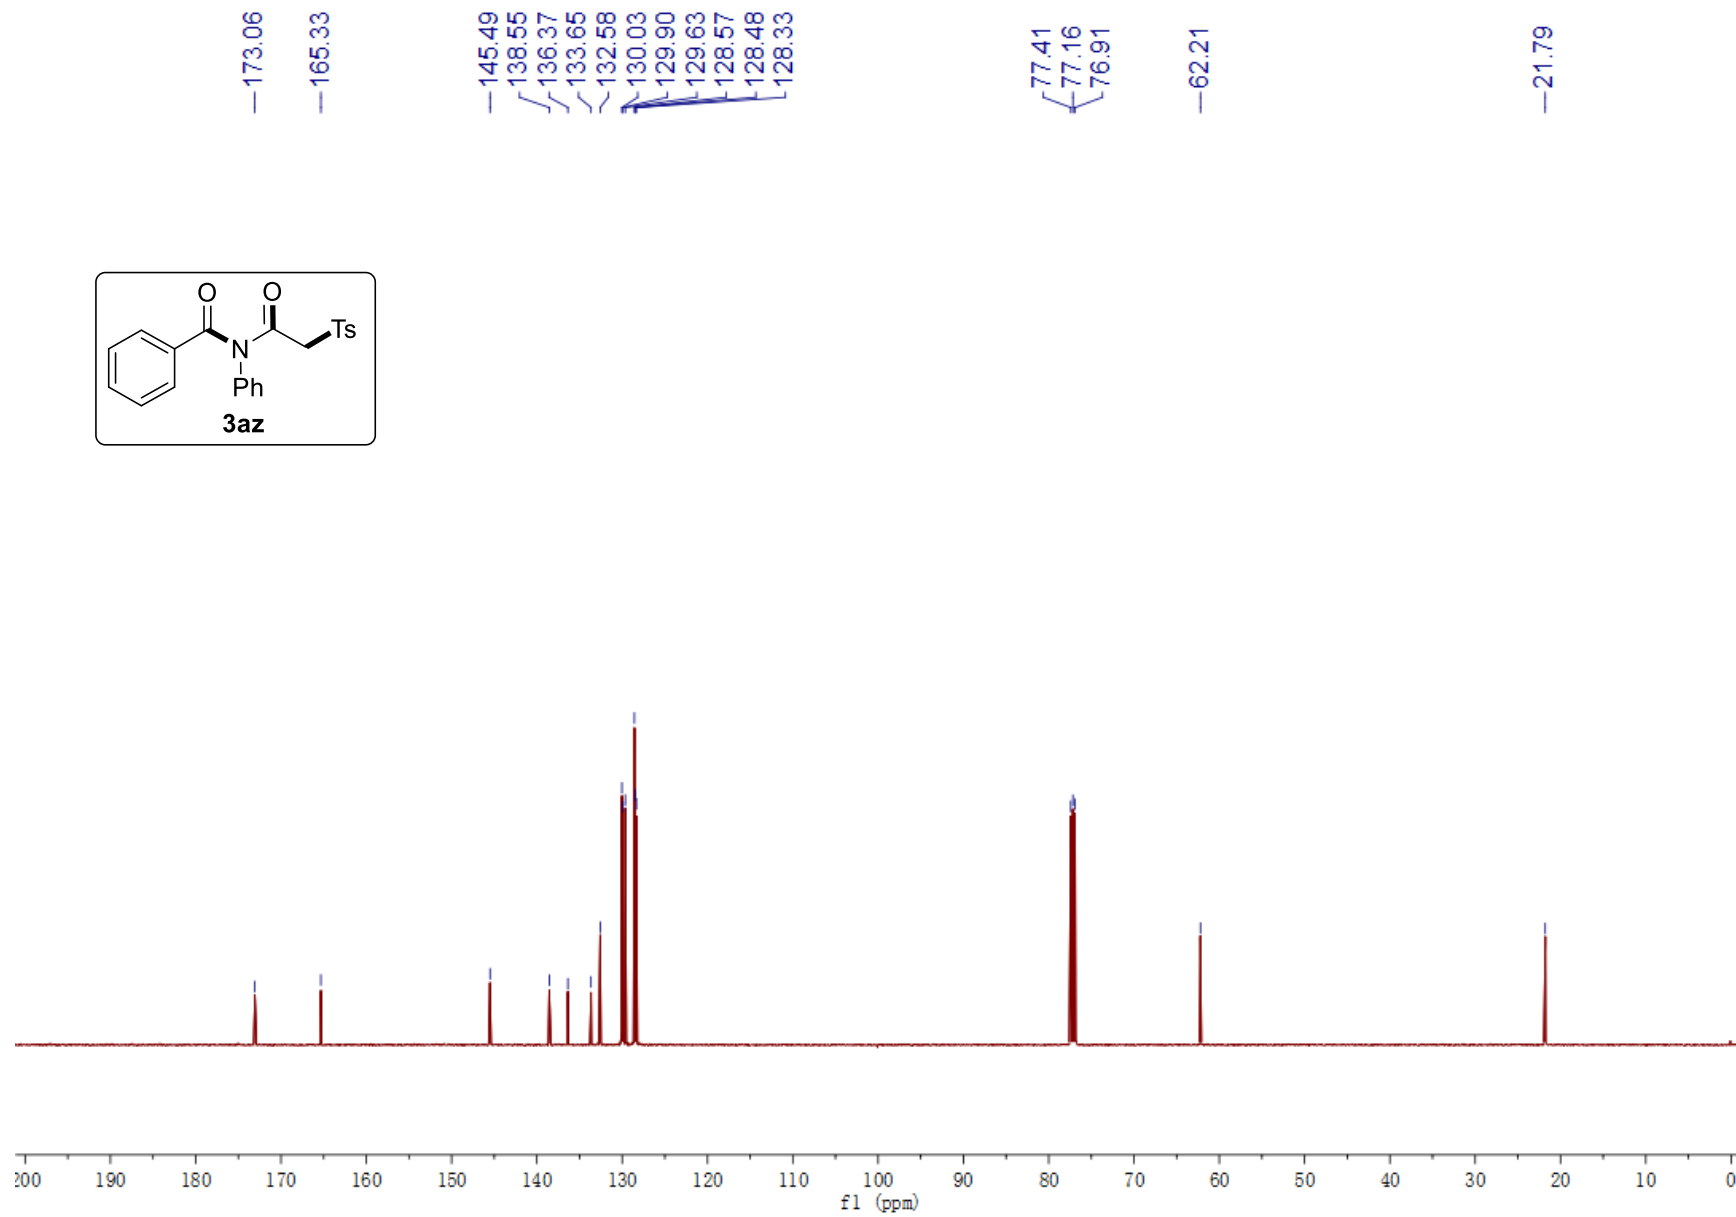

S163

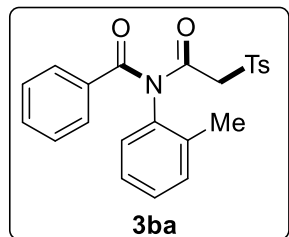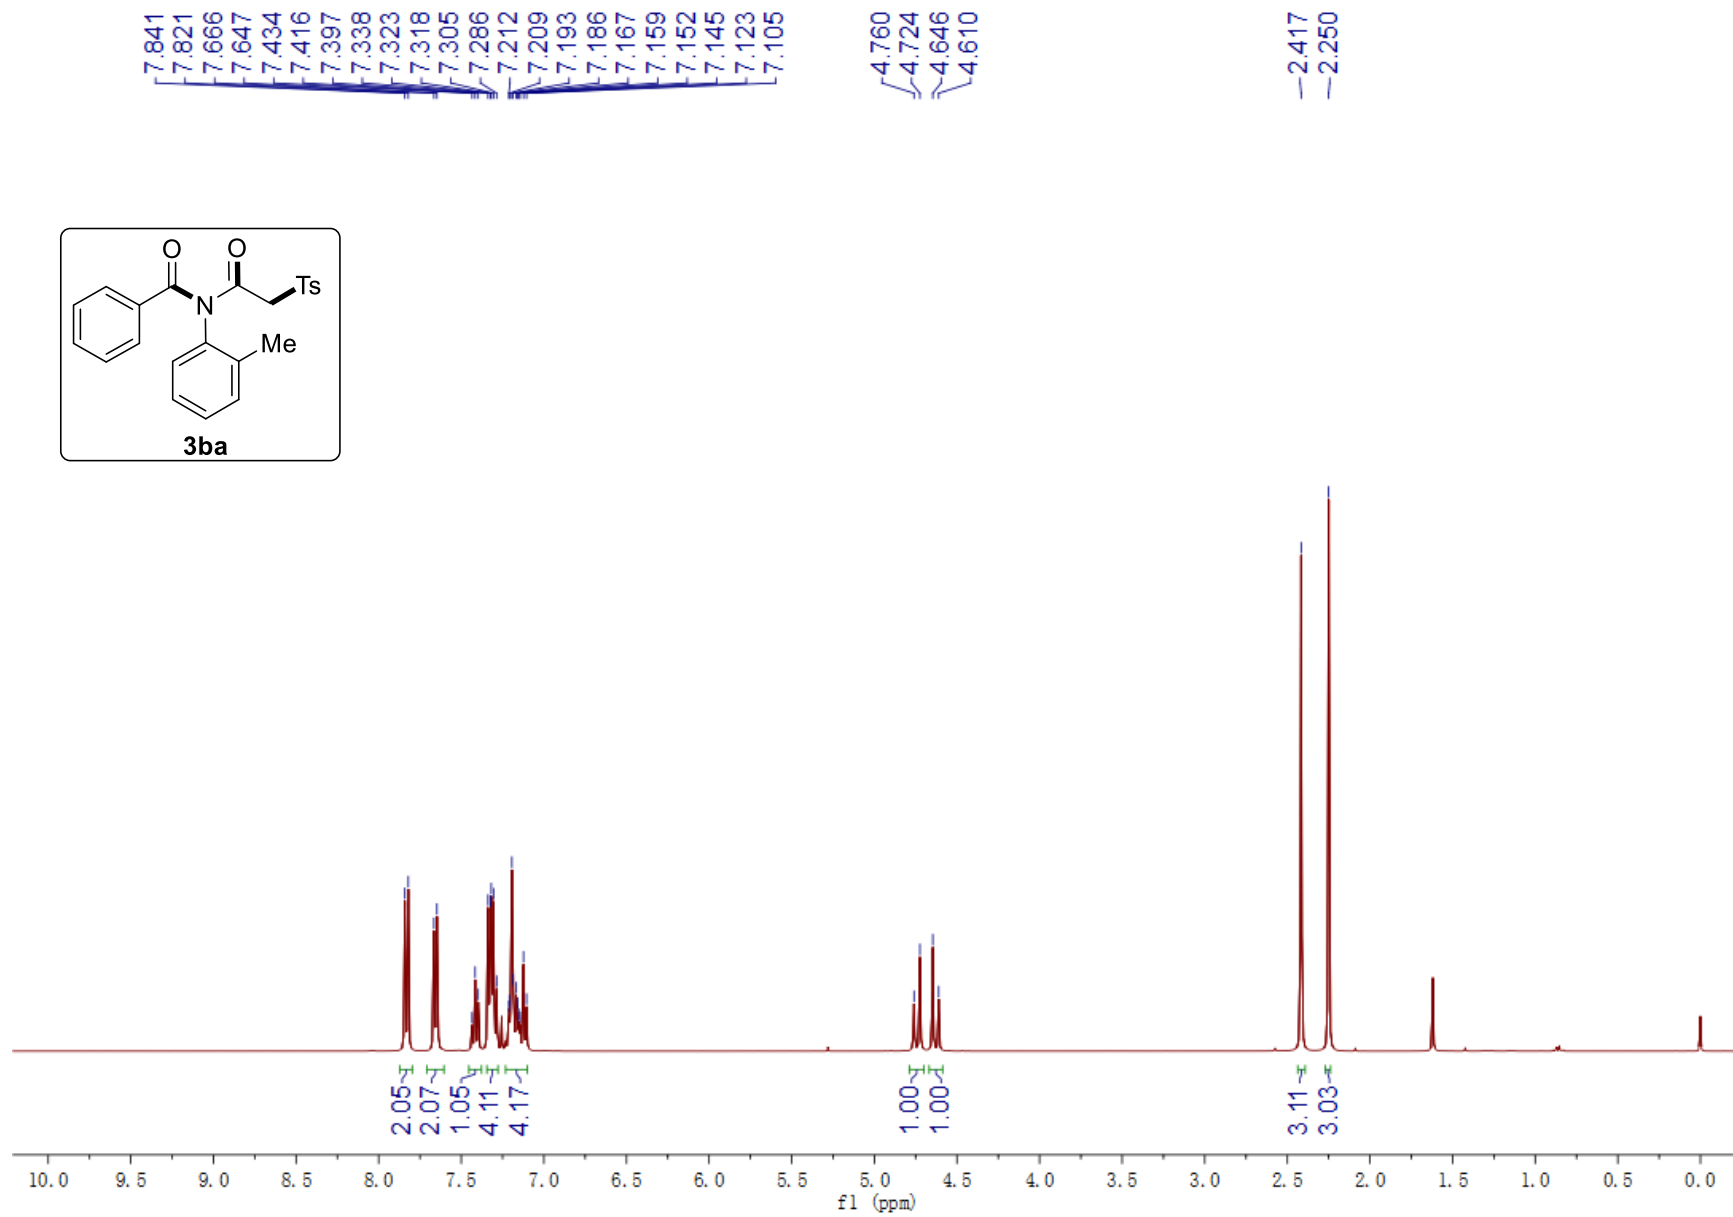

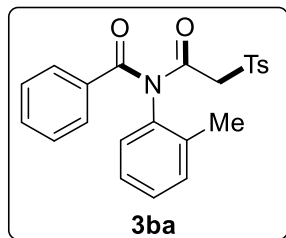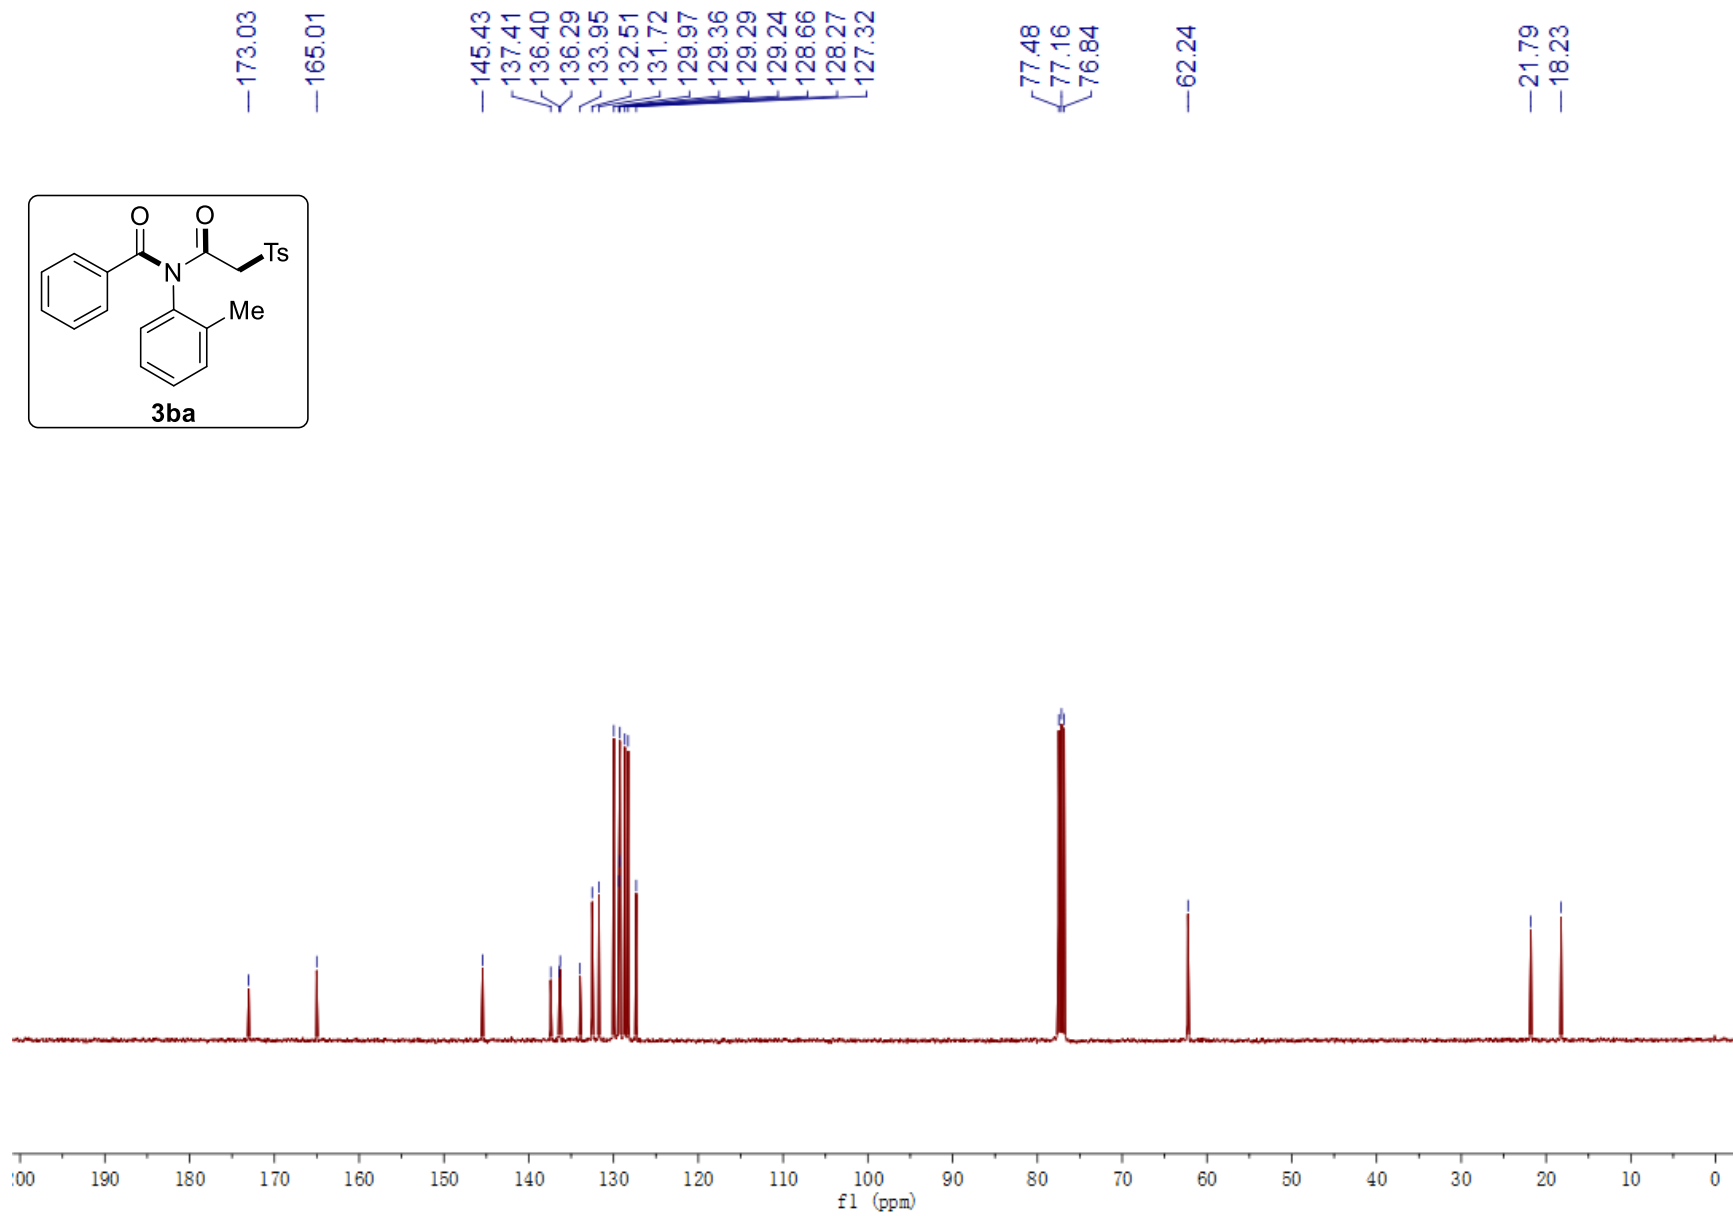

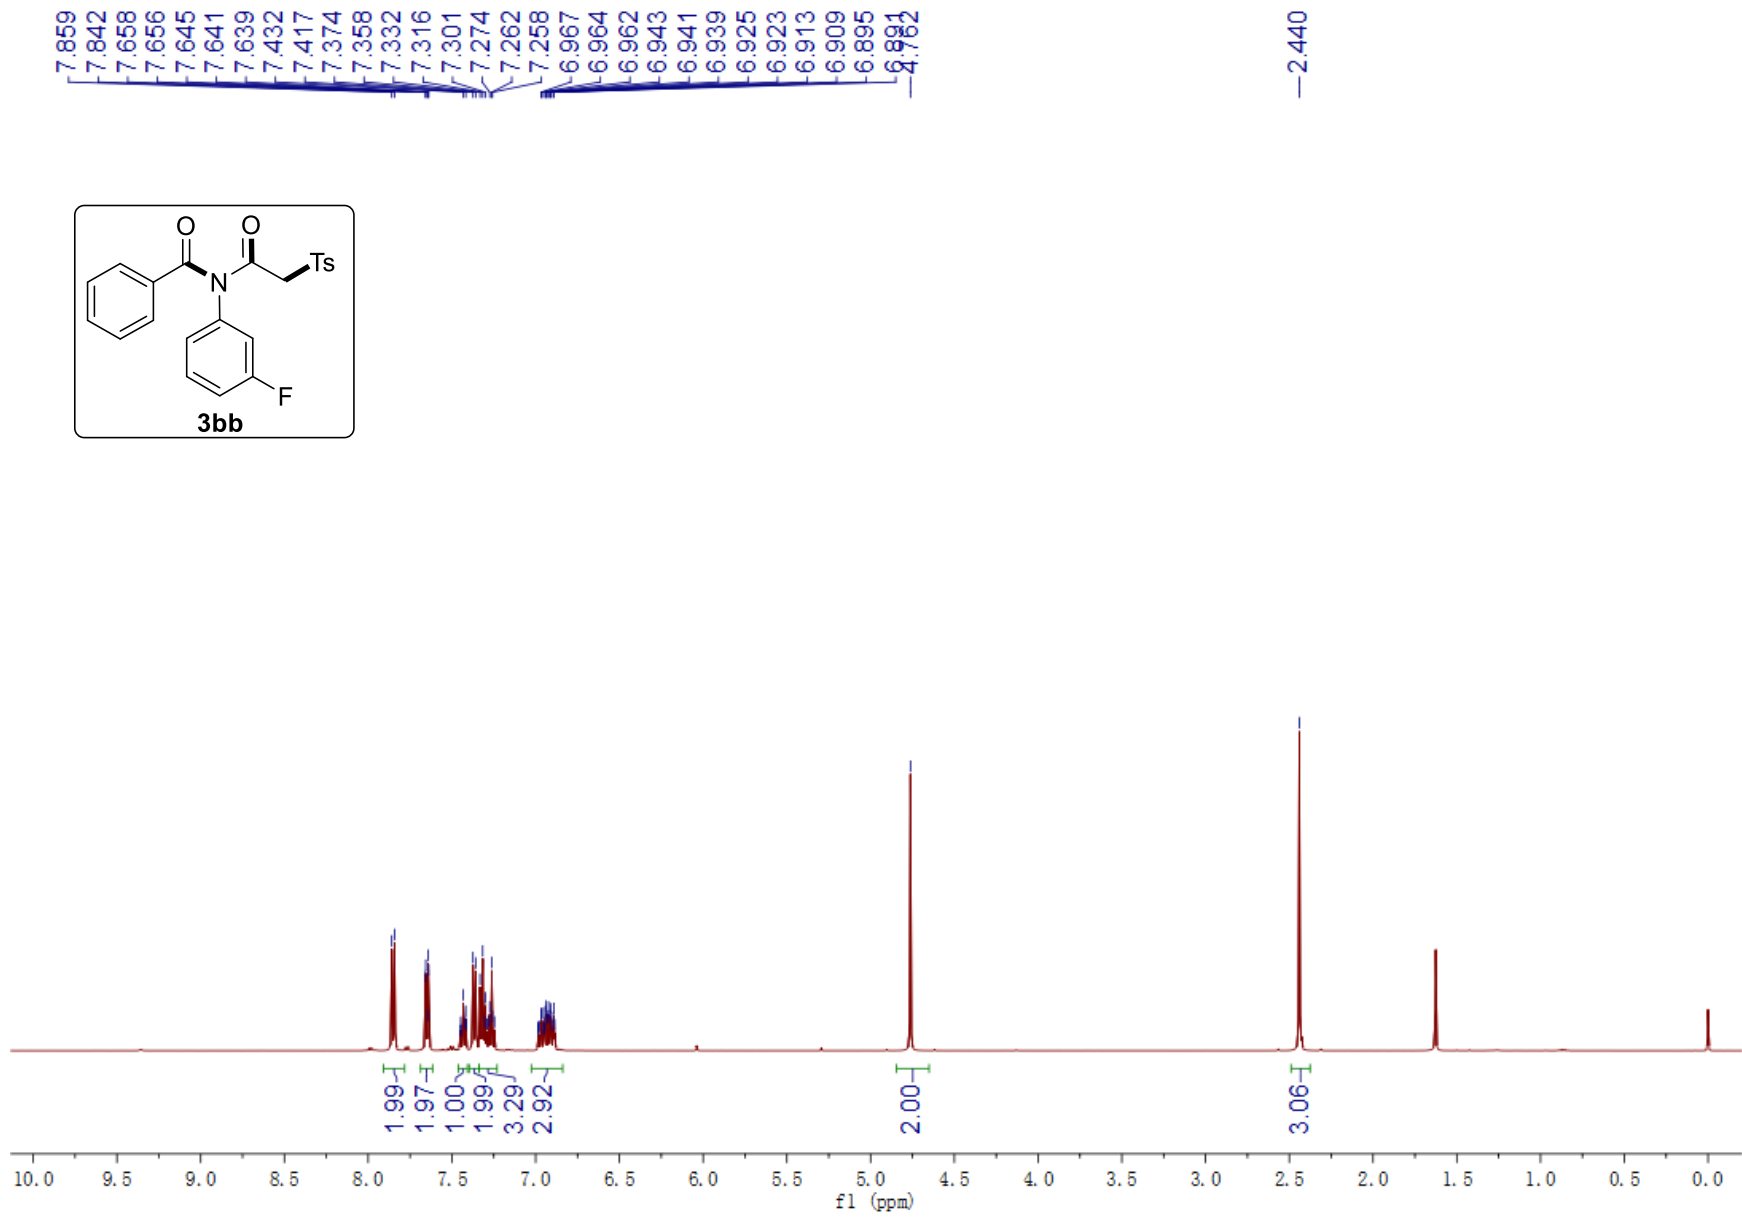

S166

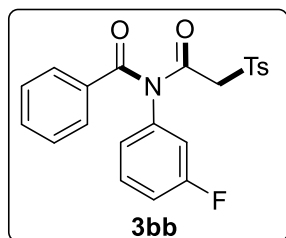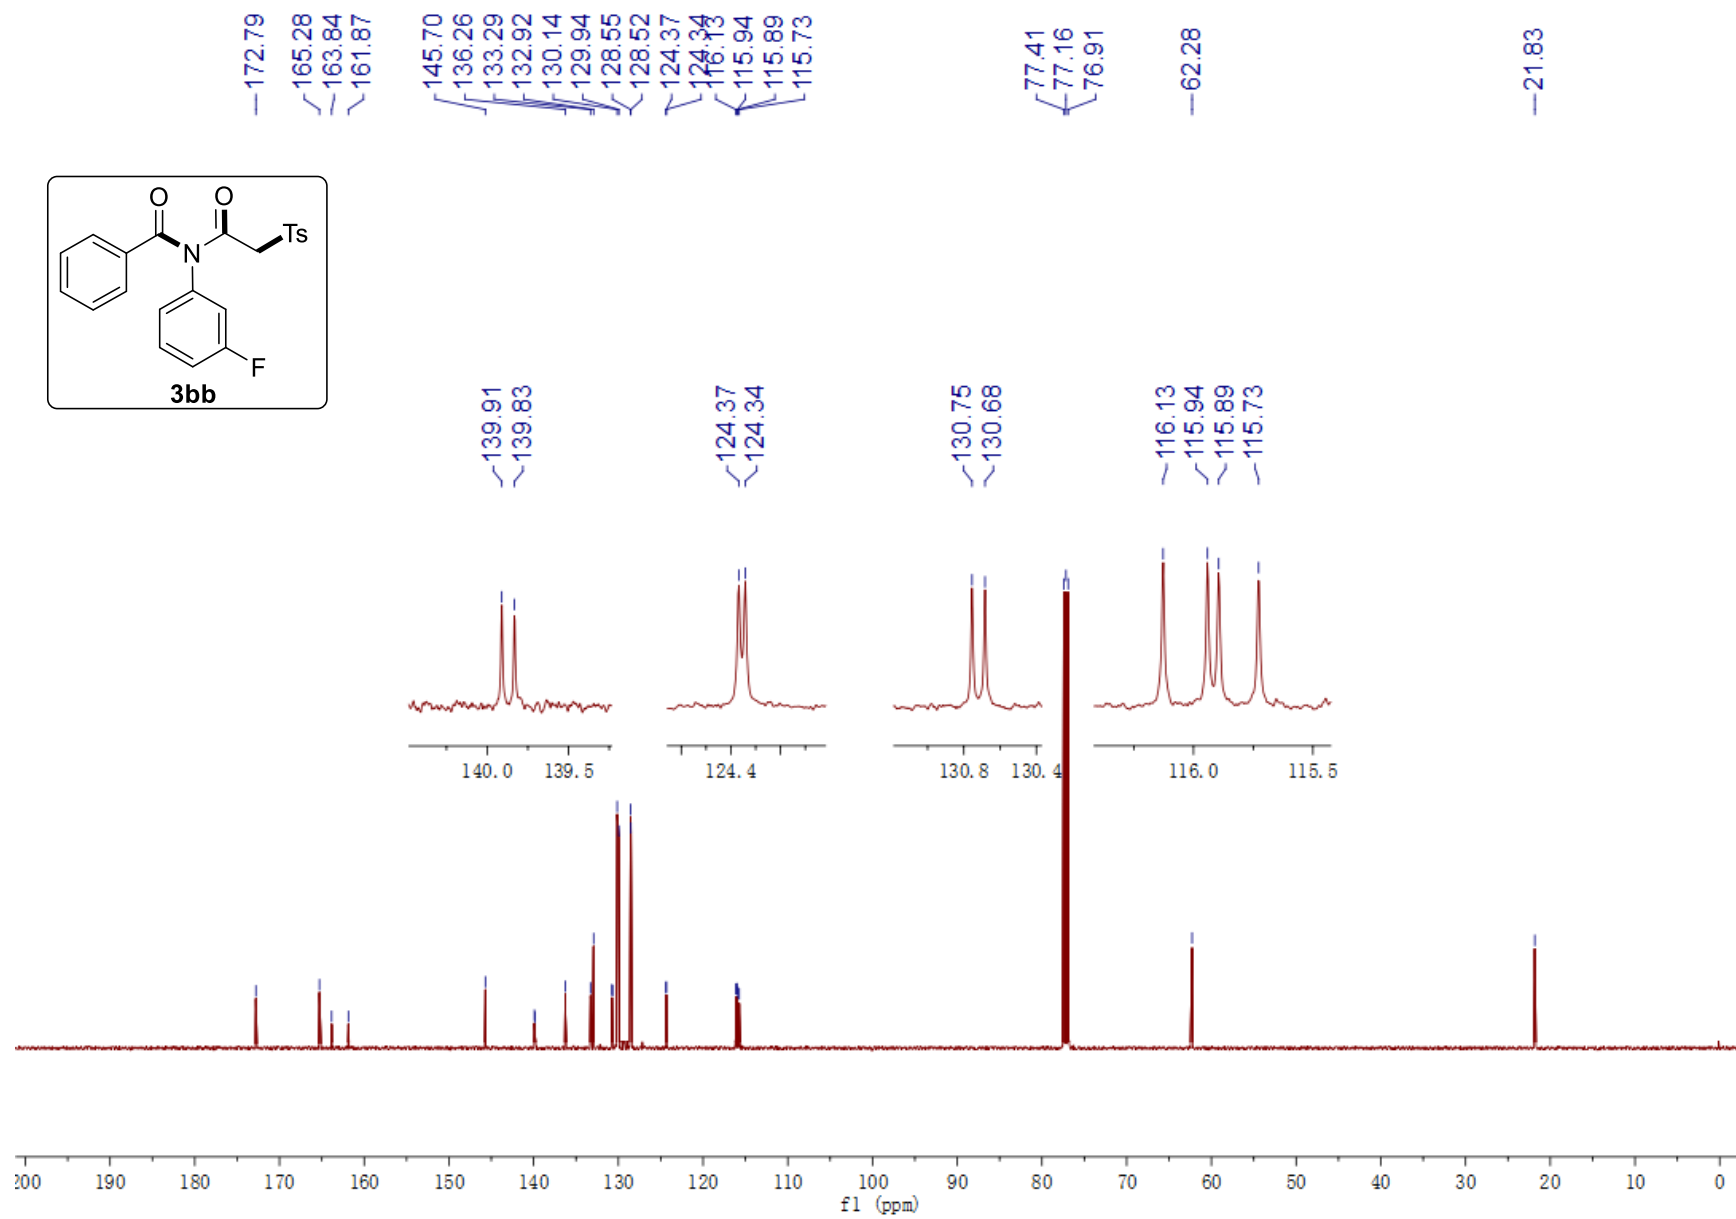

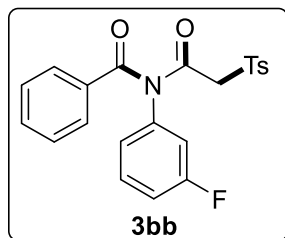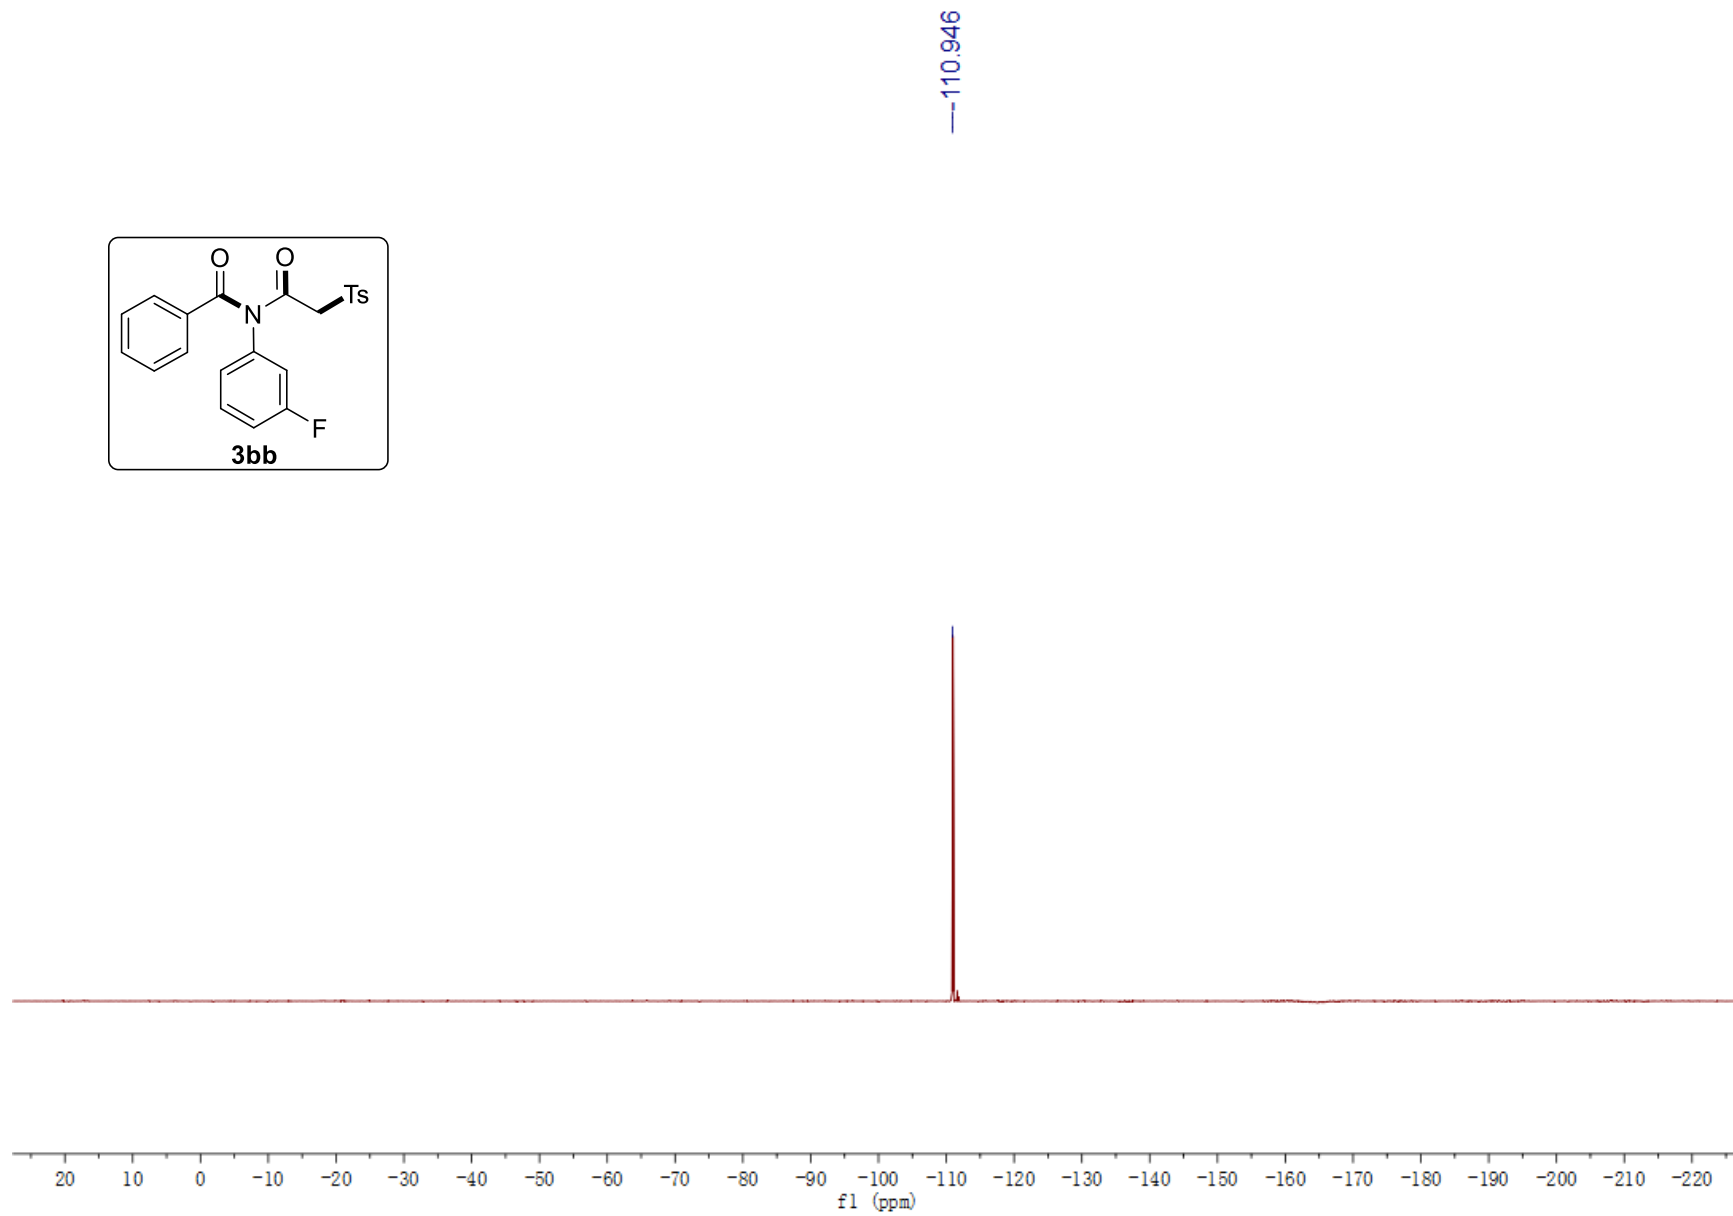

S168



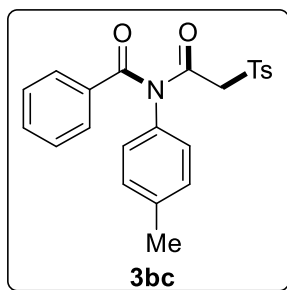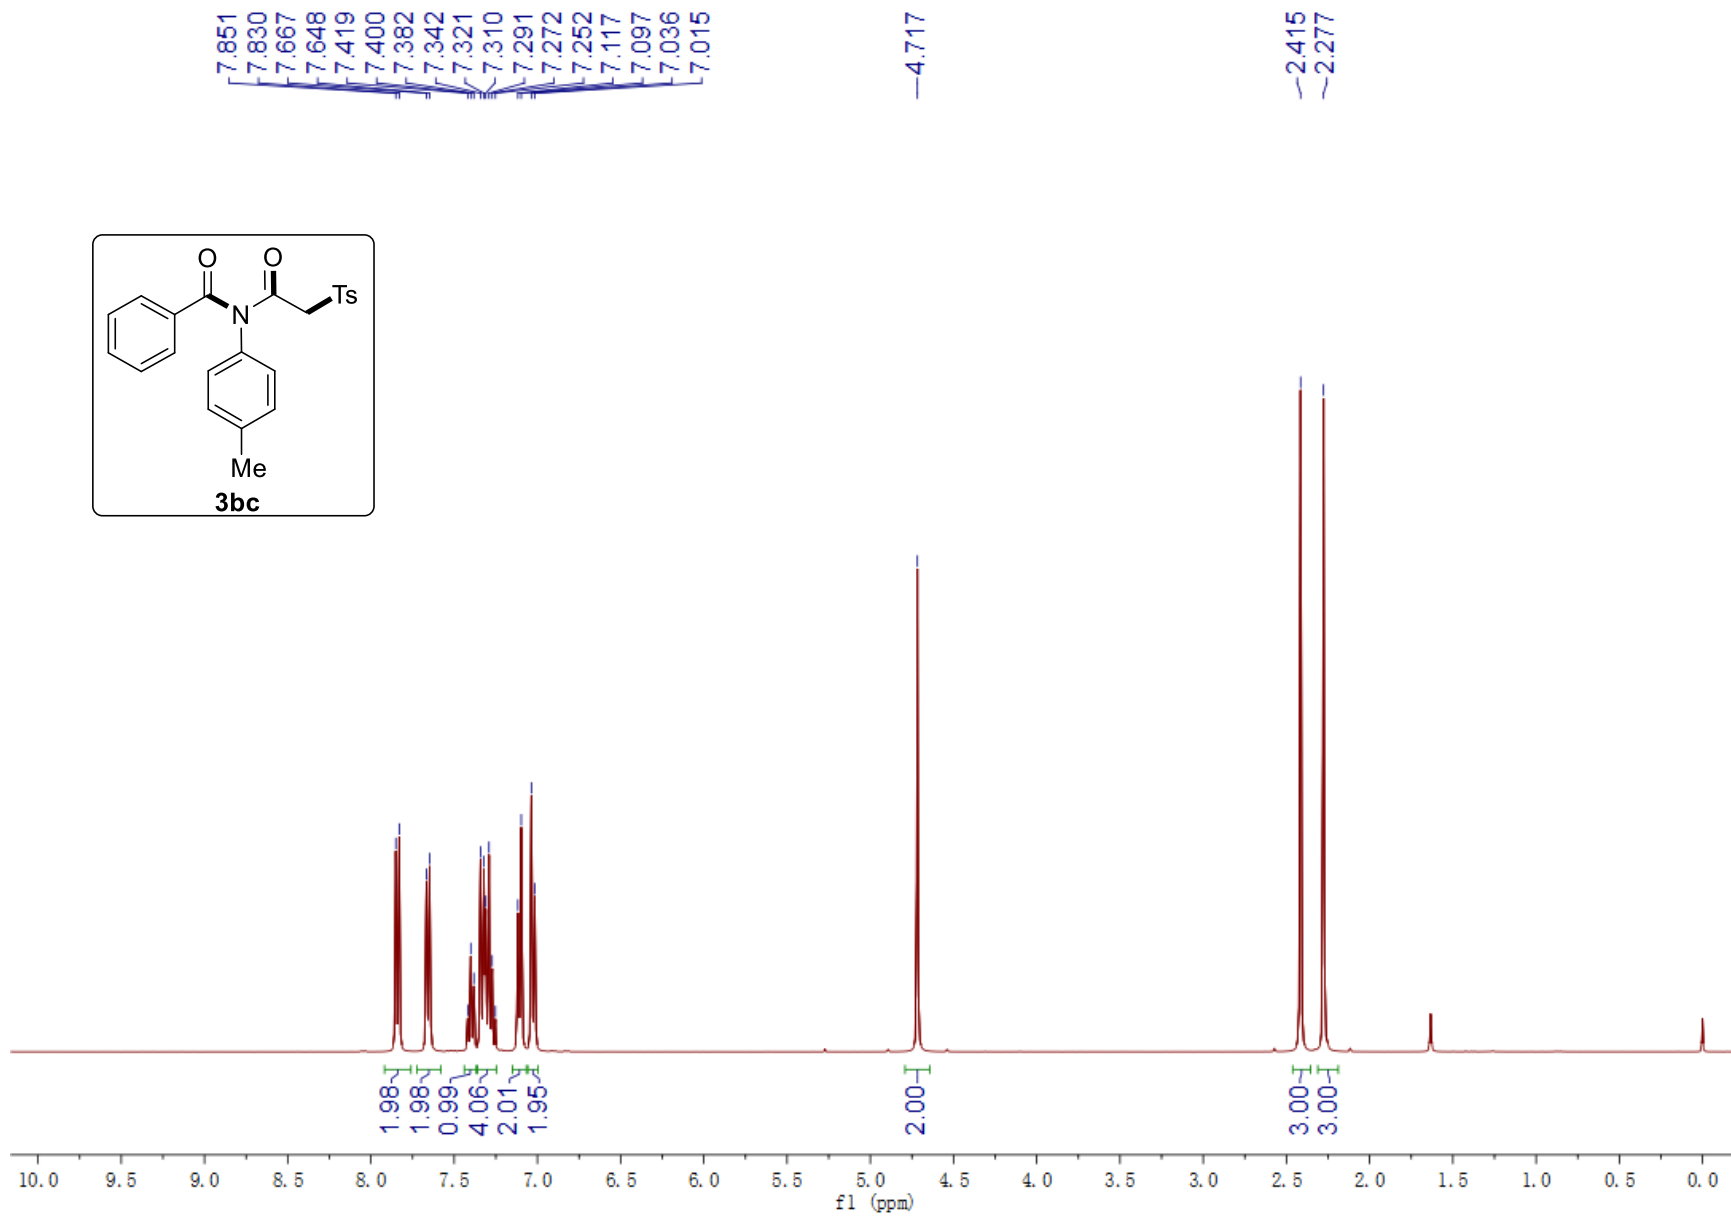

S169

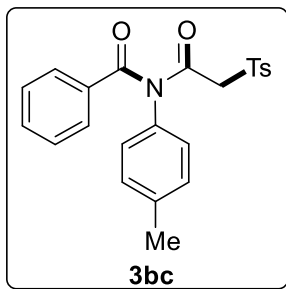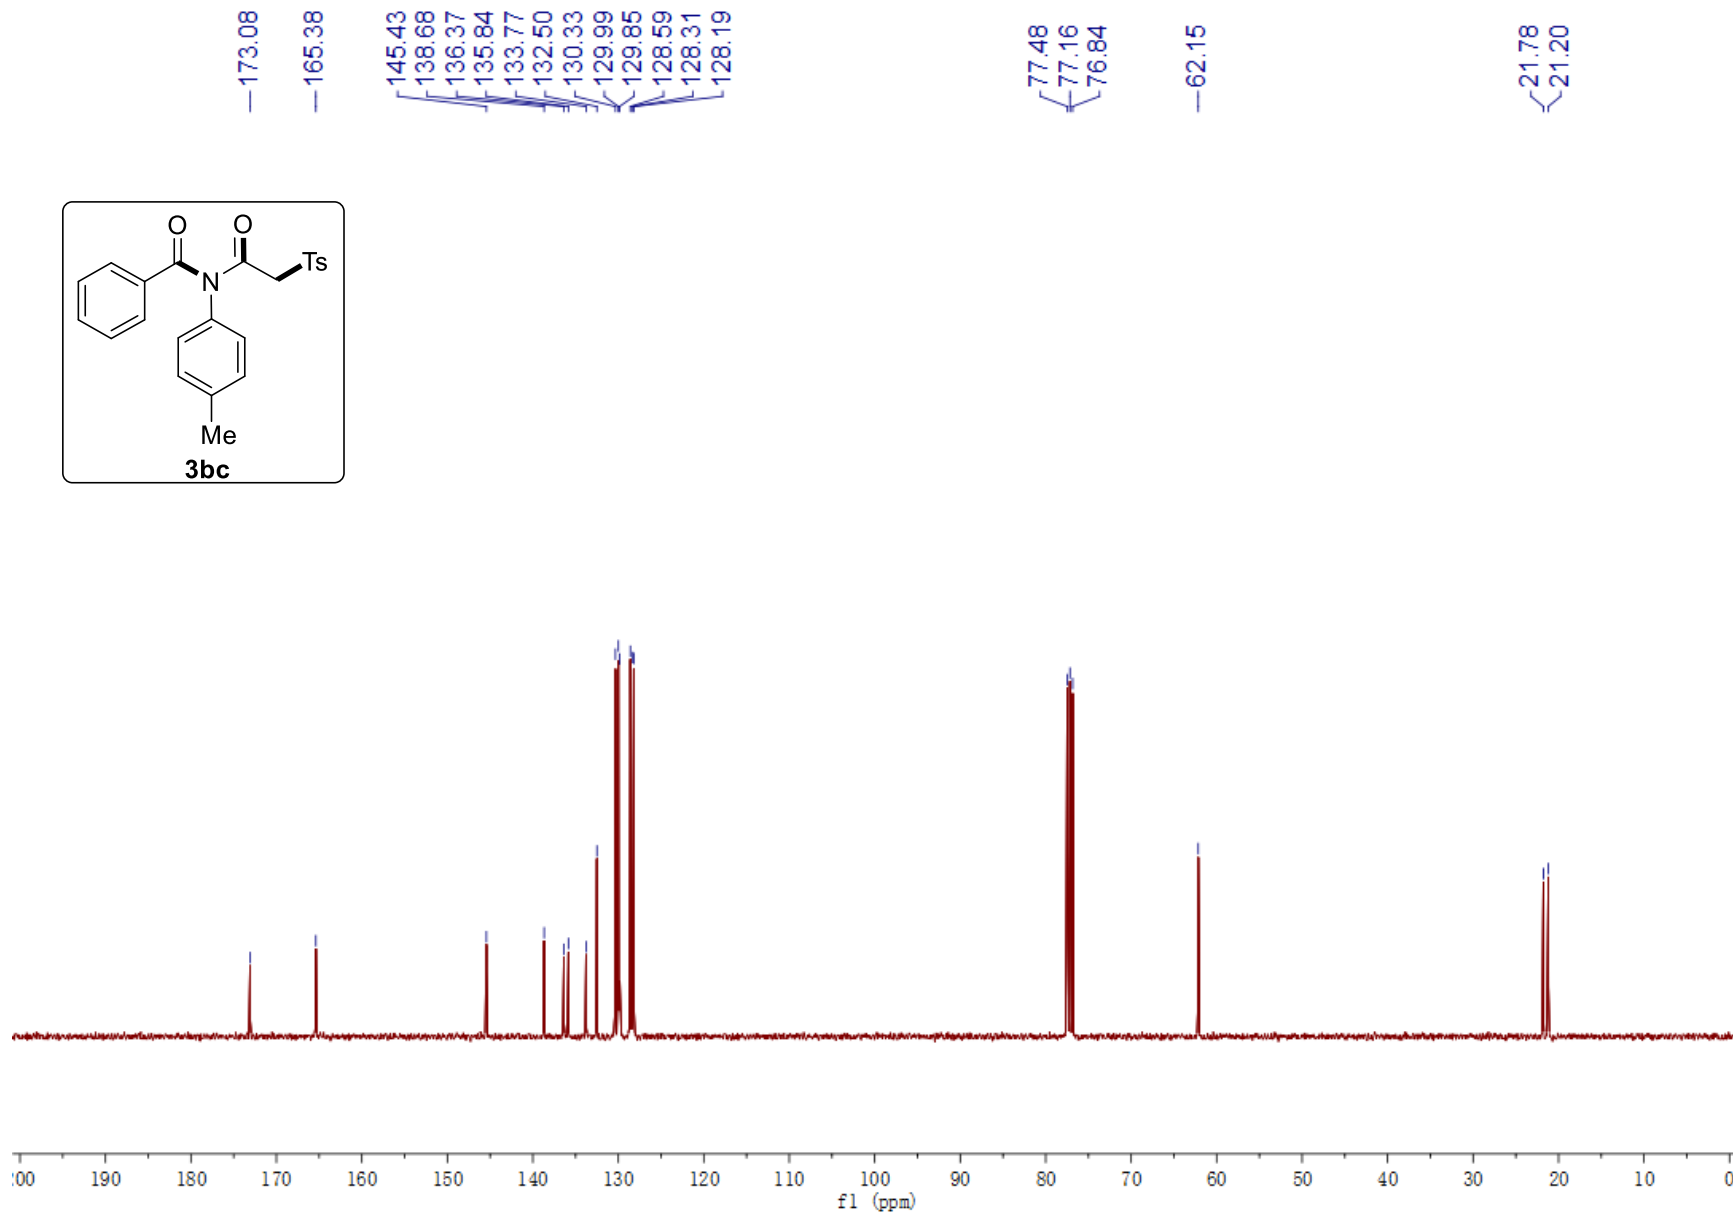

S170

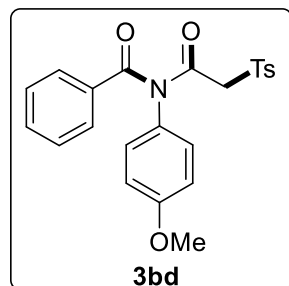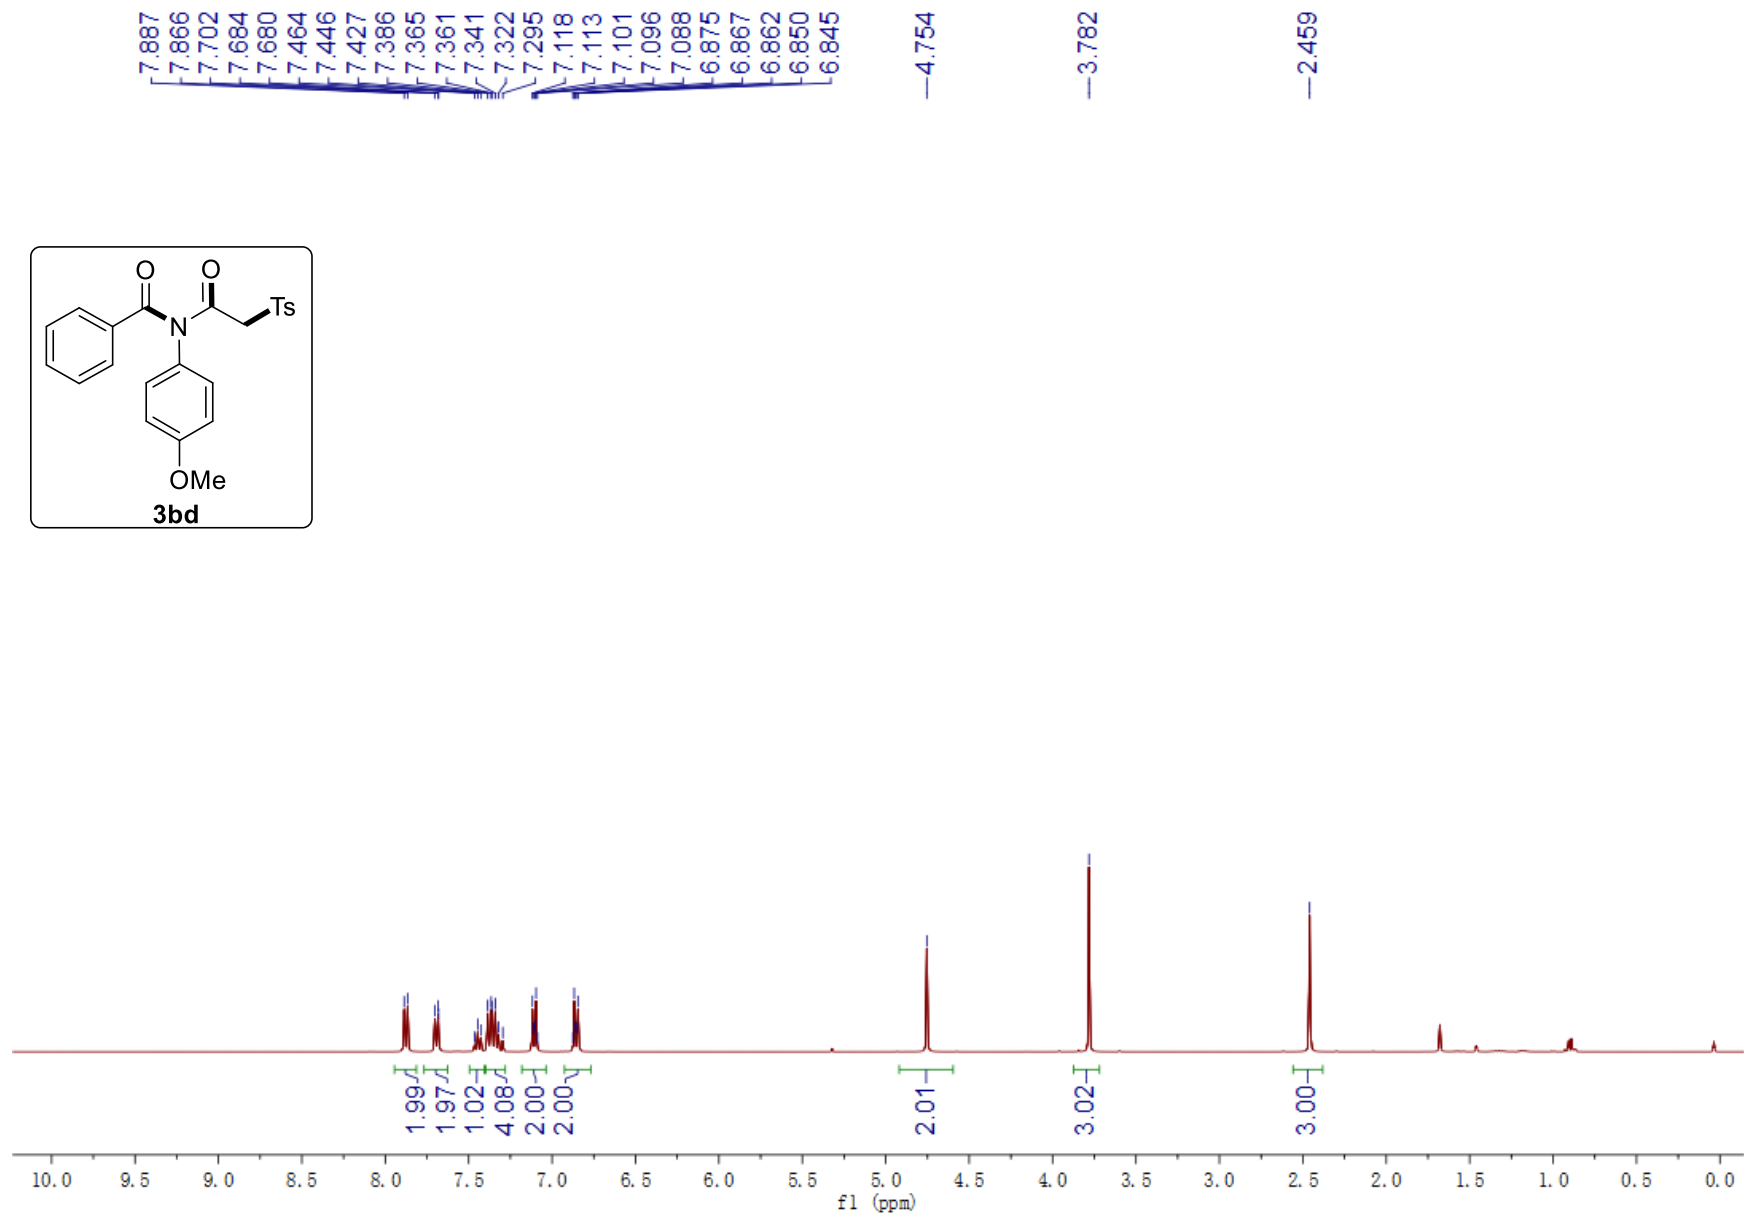

S171

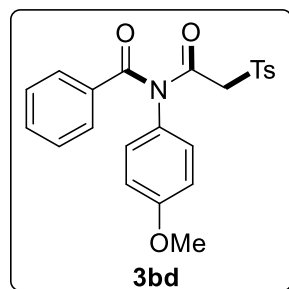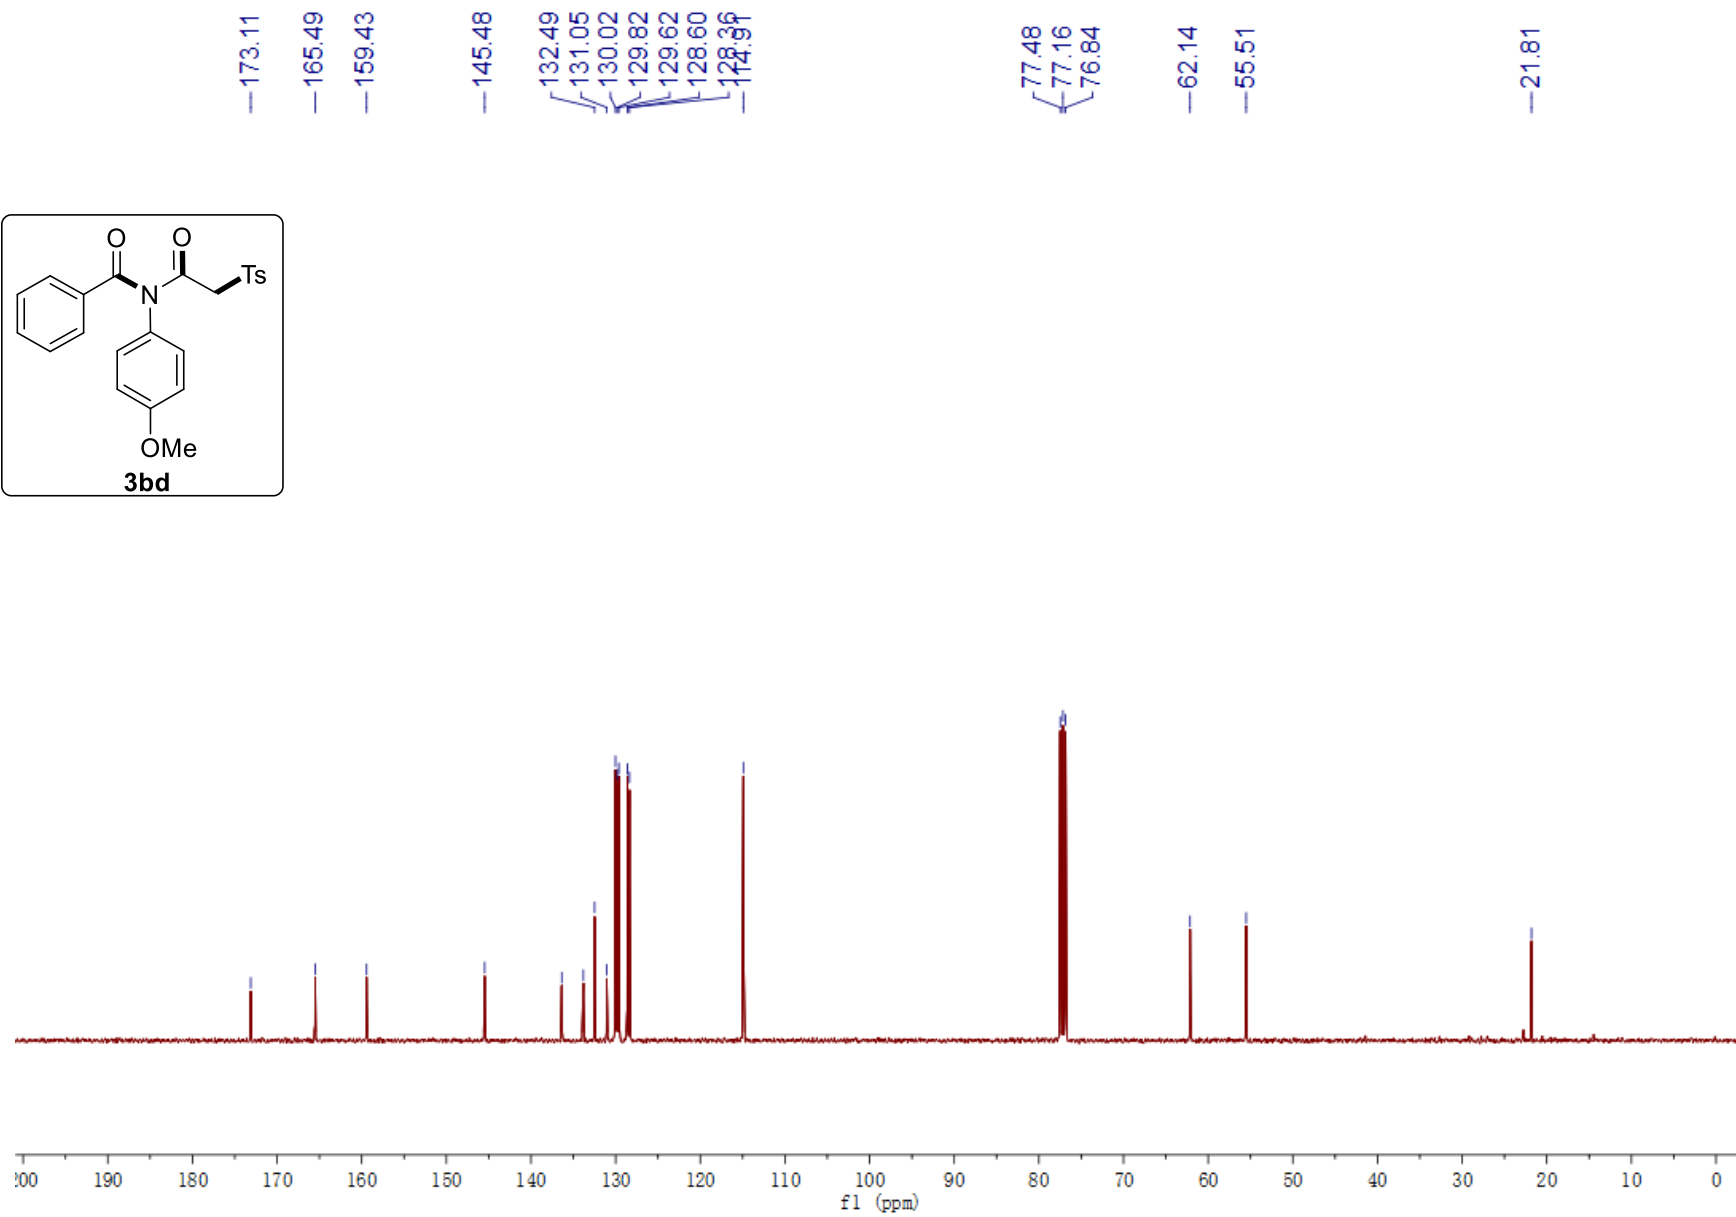

S172

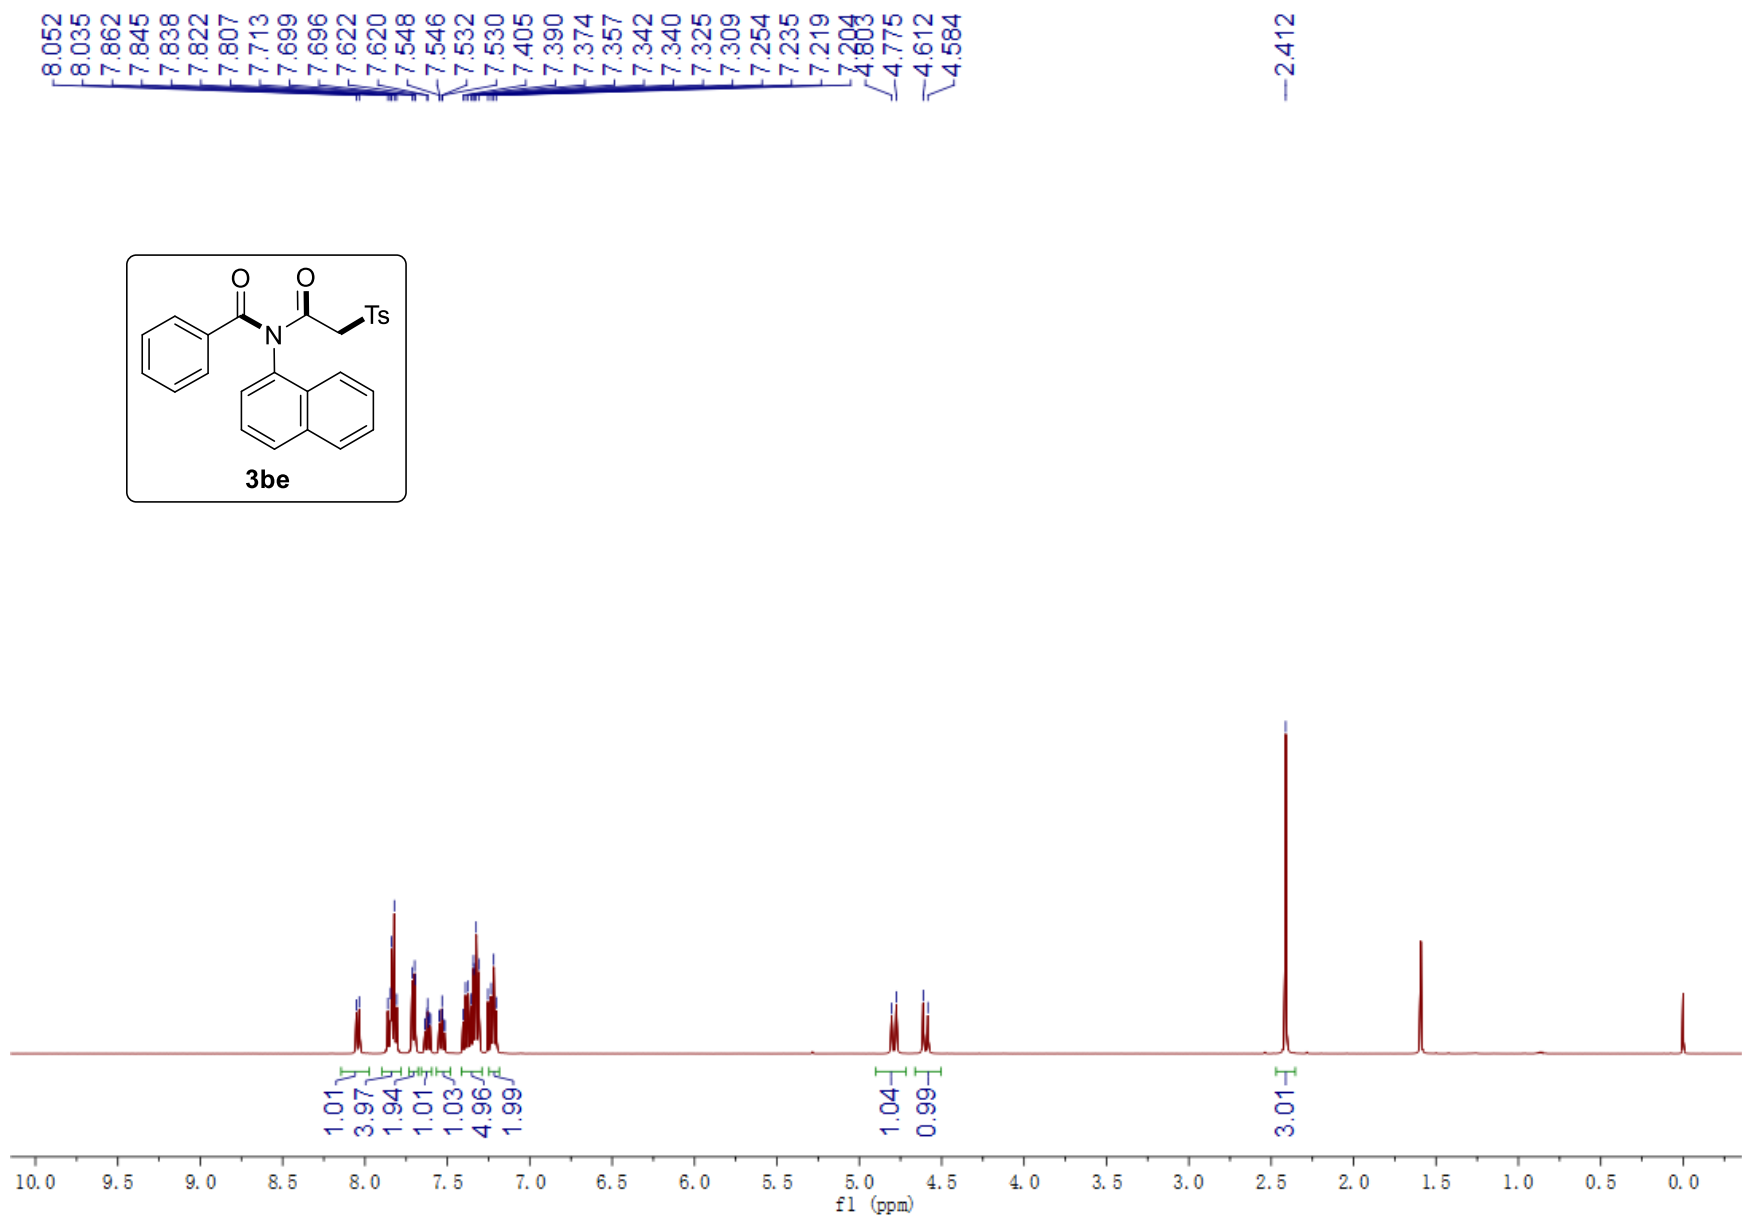

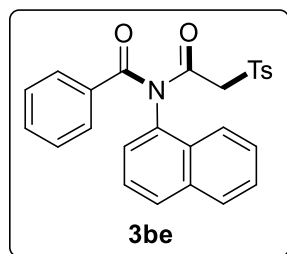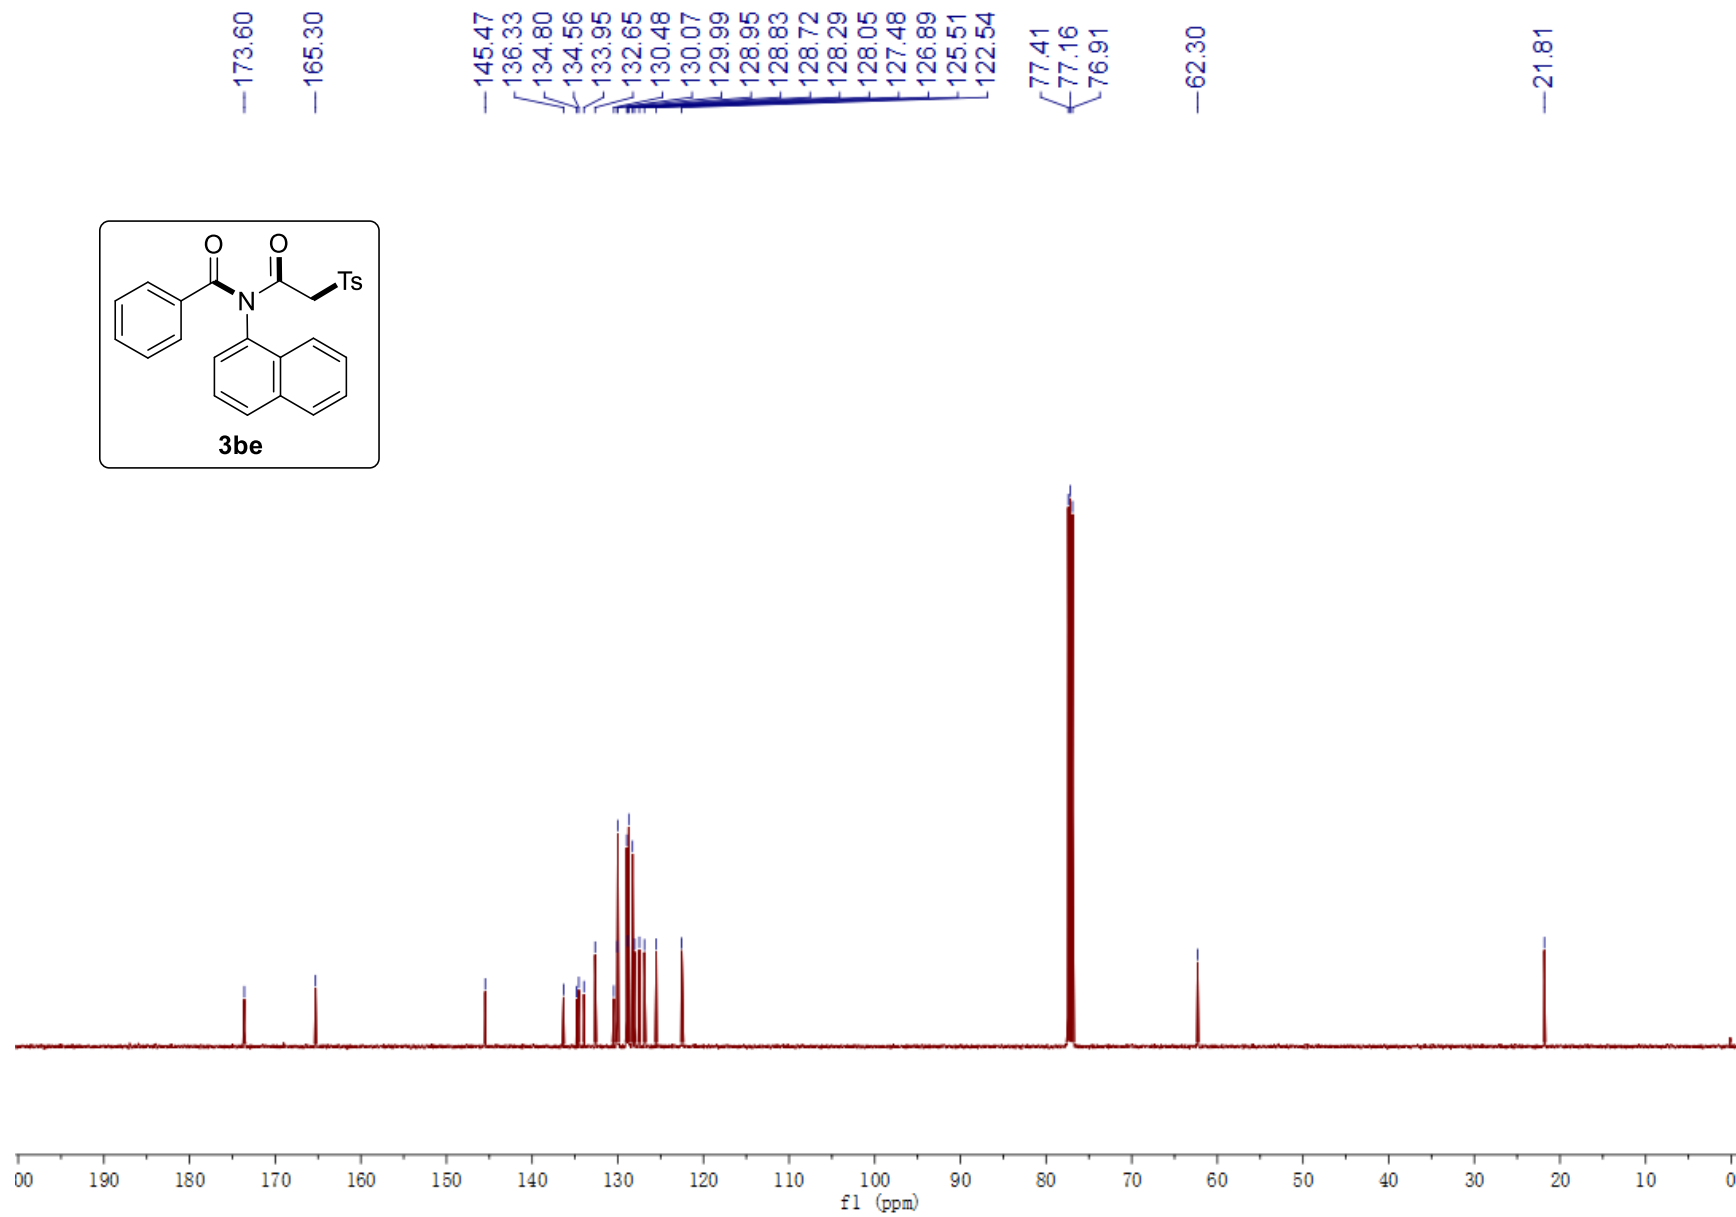

S174

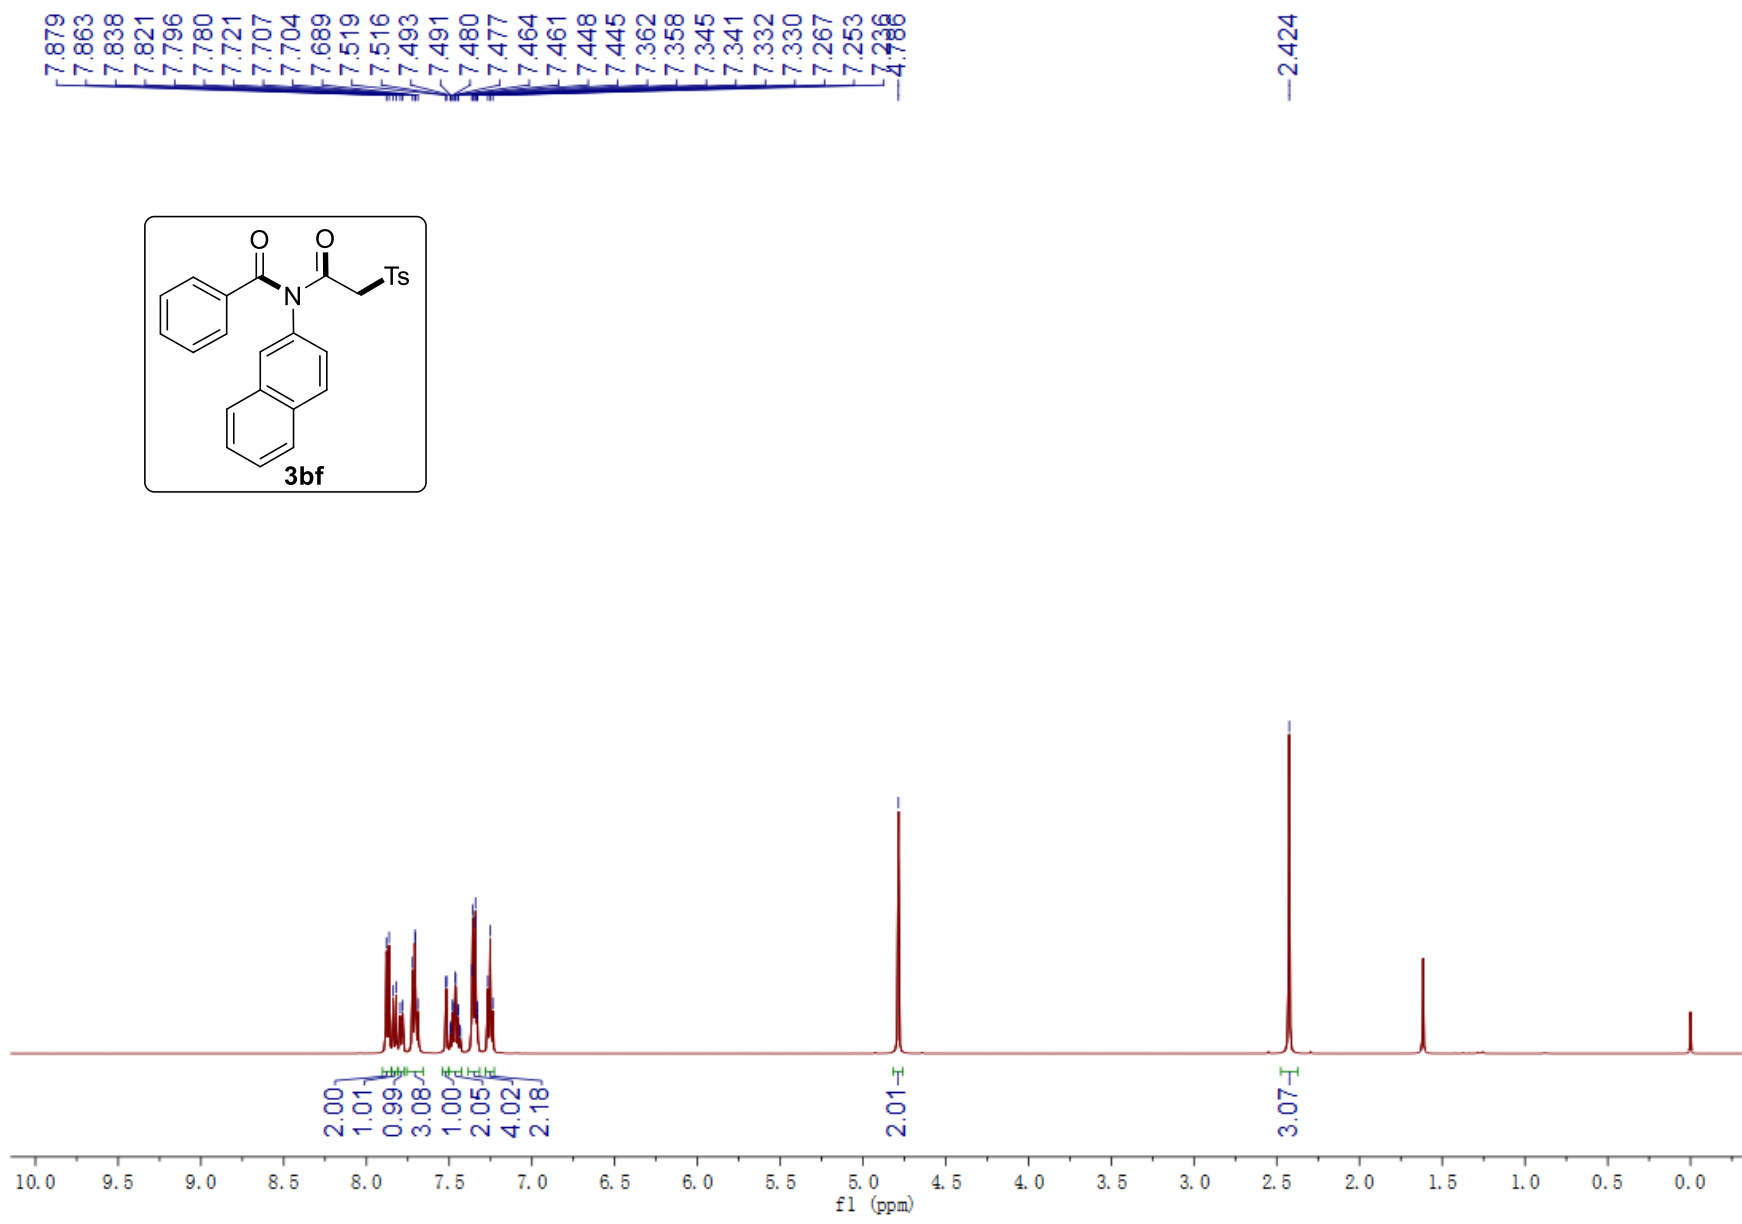

S175

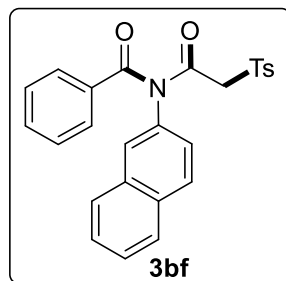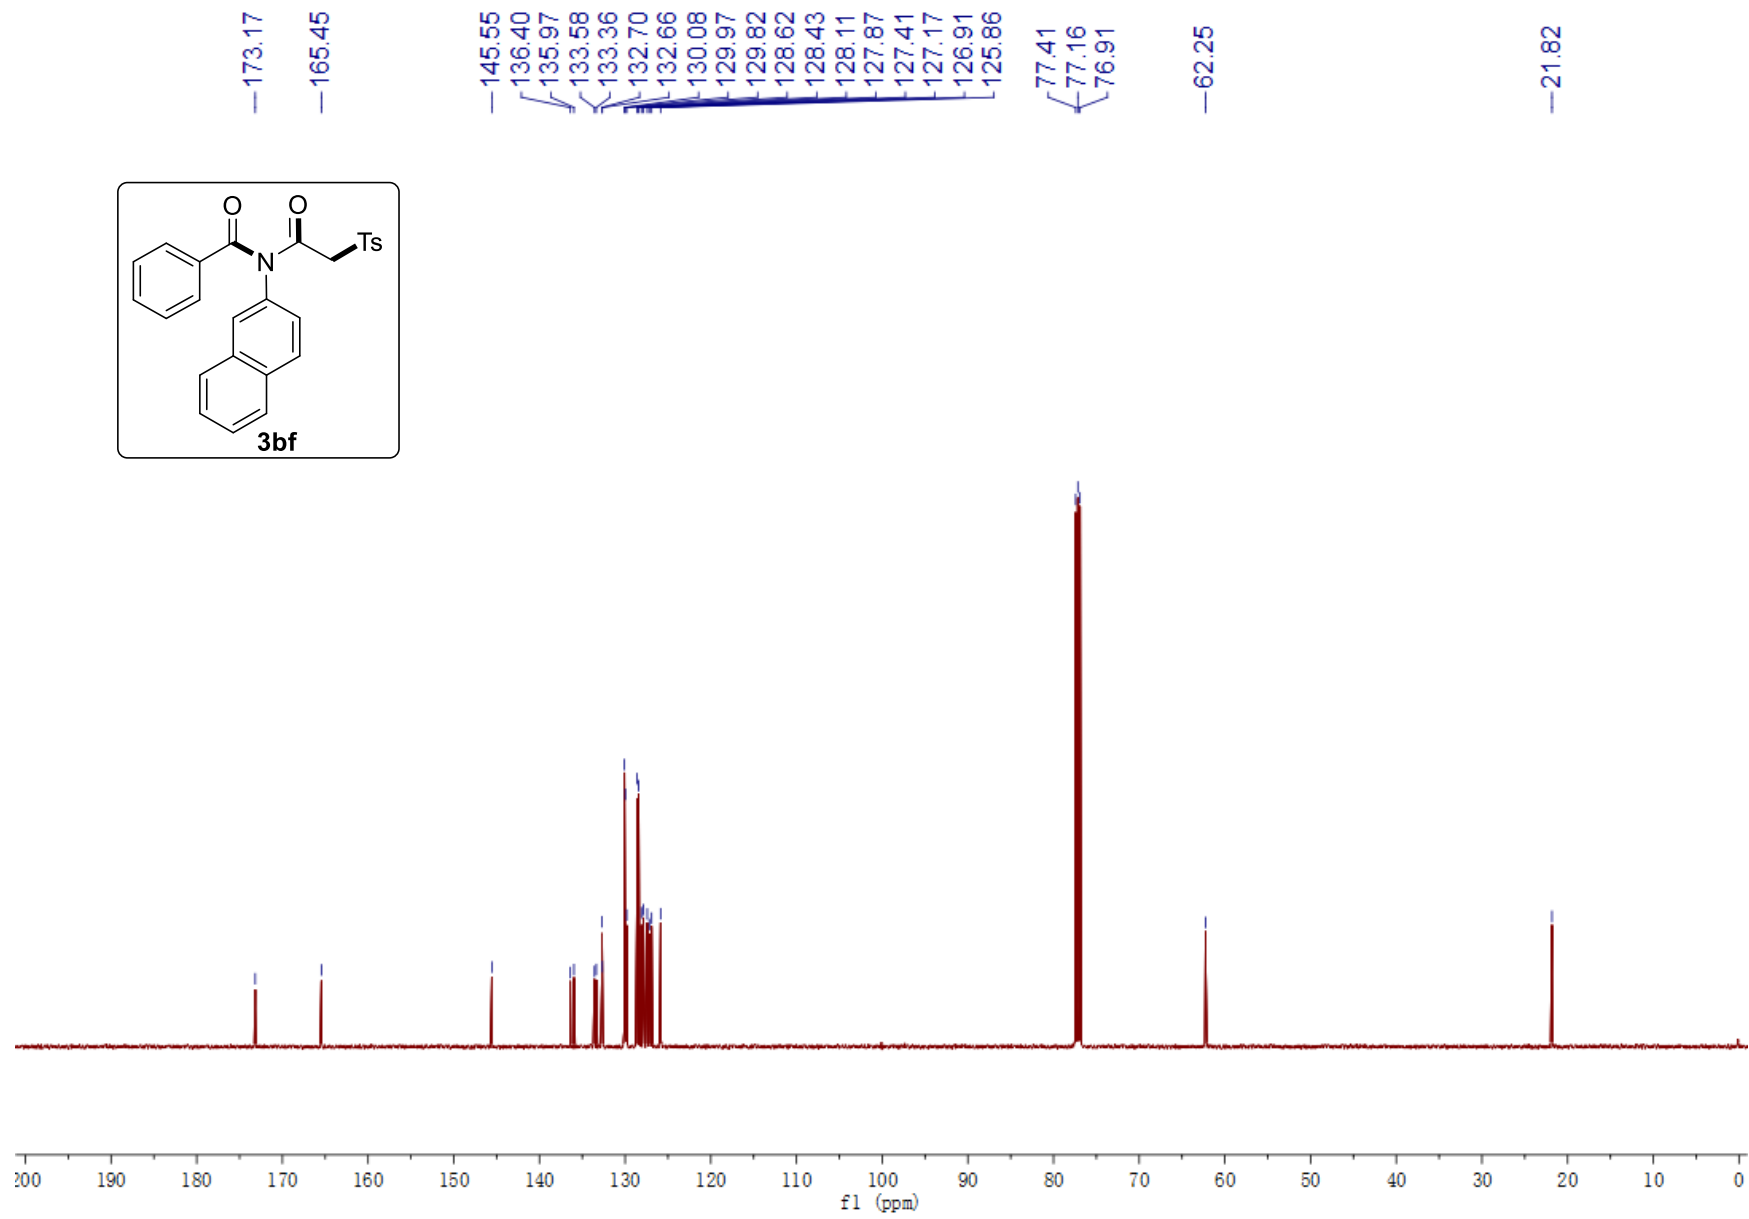

S176



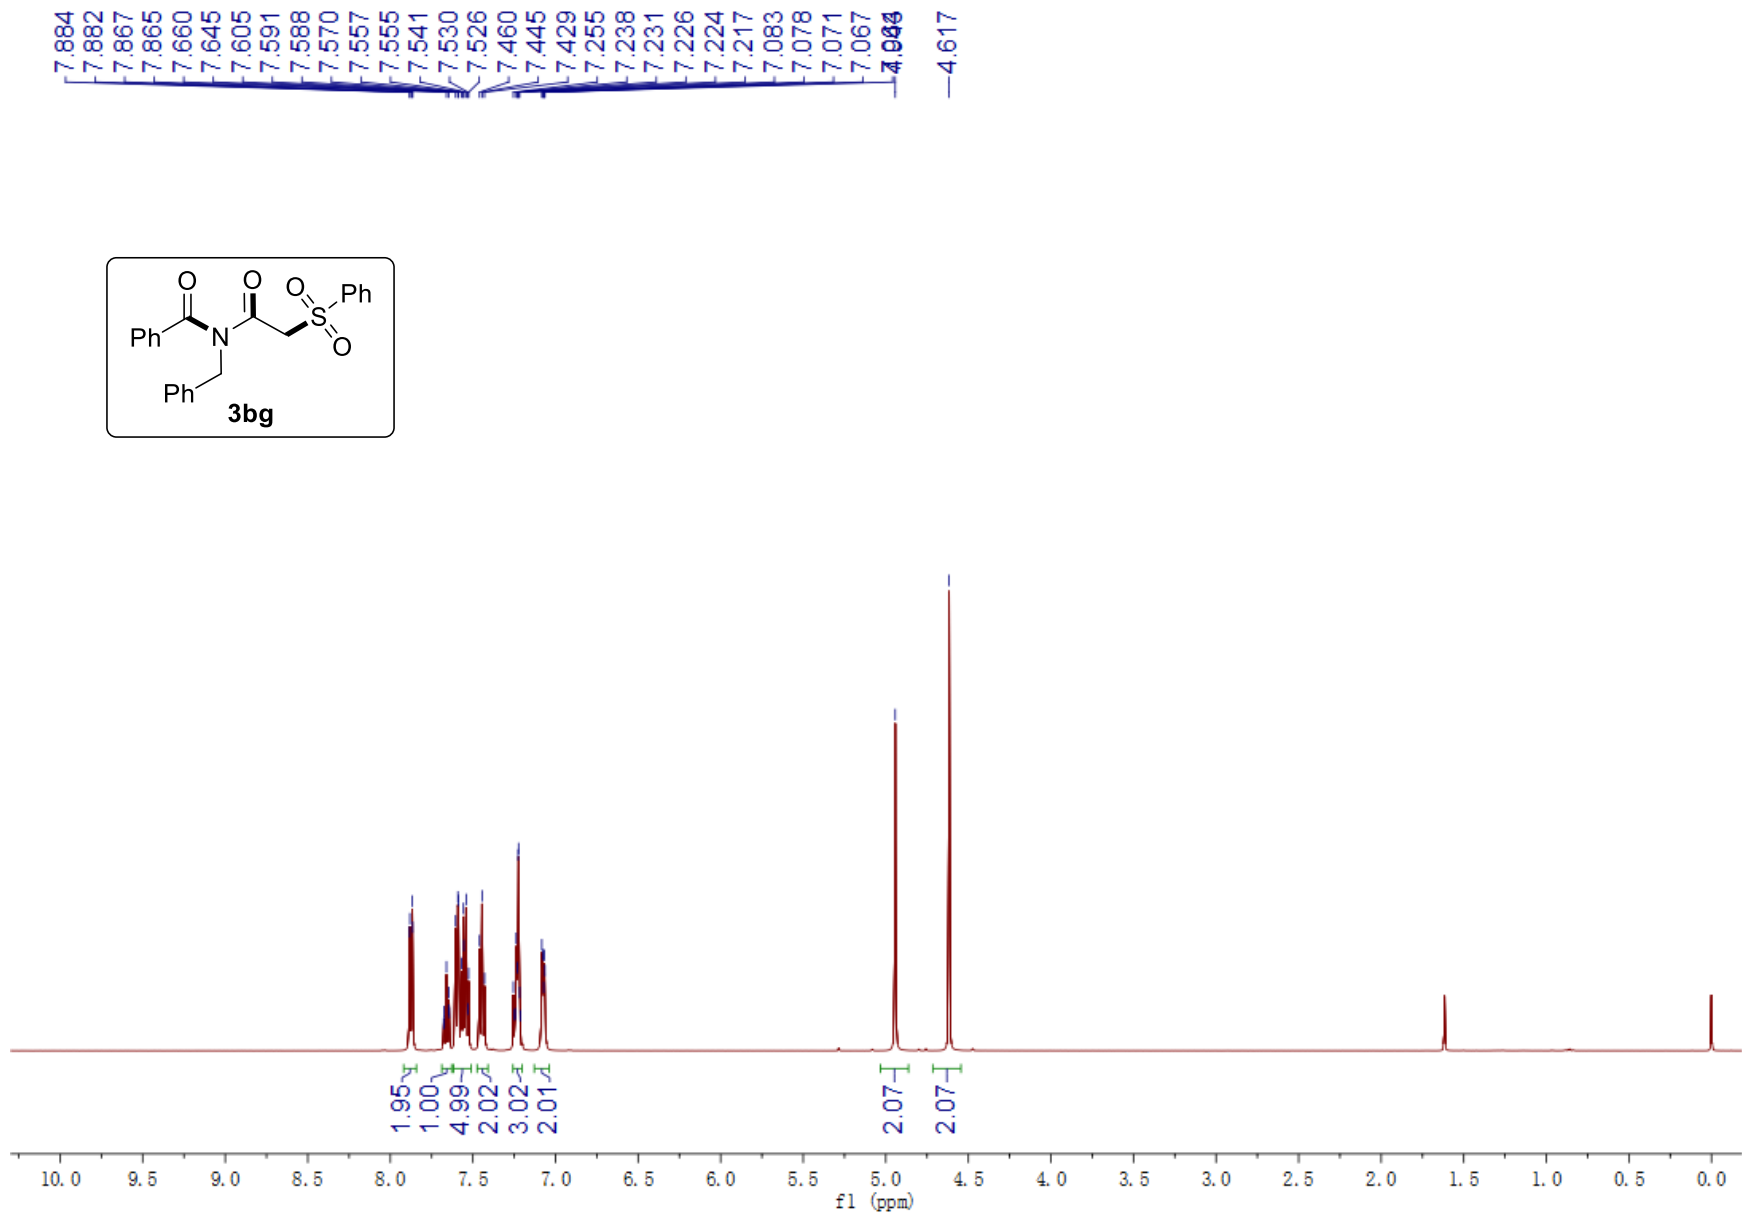

S177

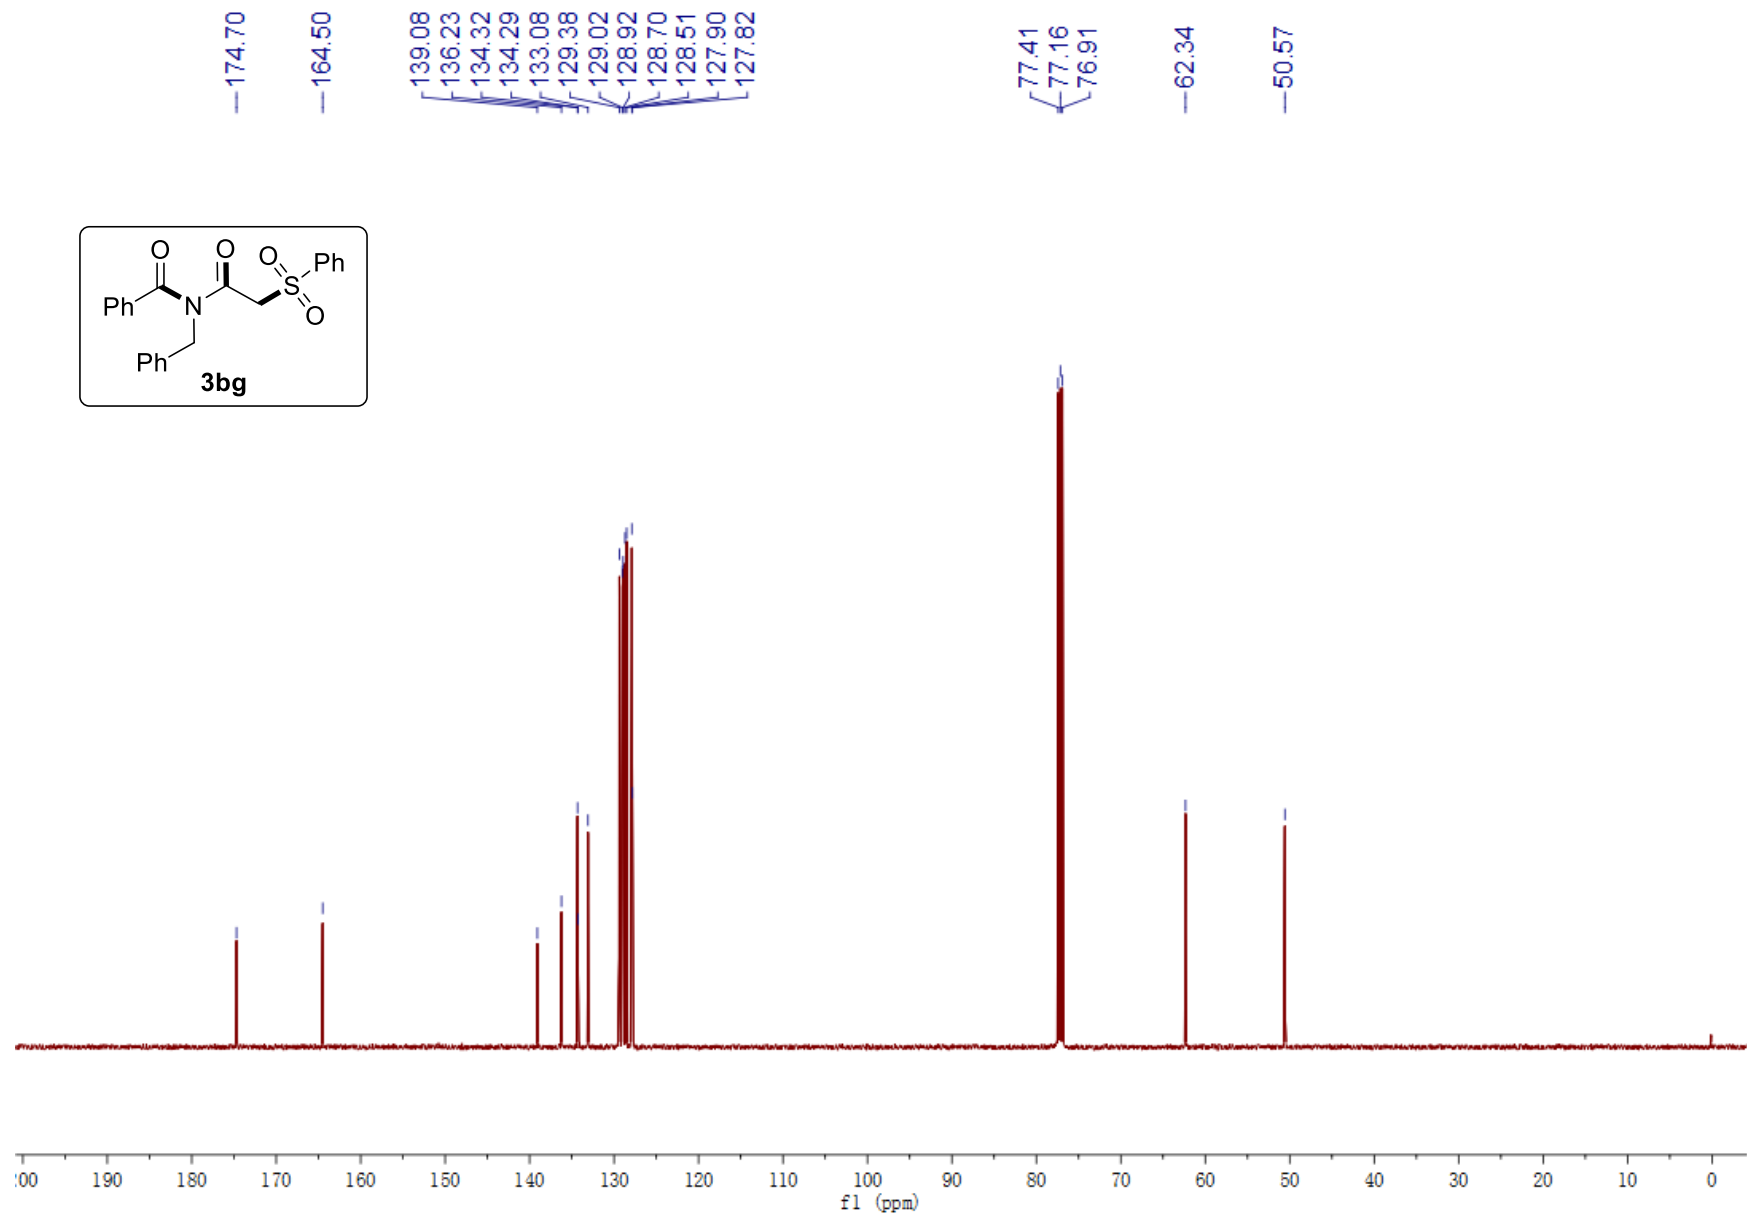

S178

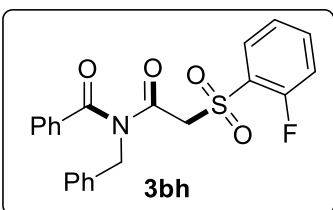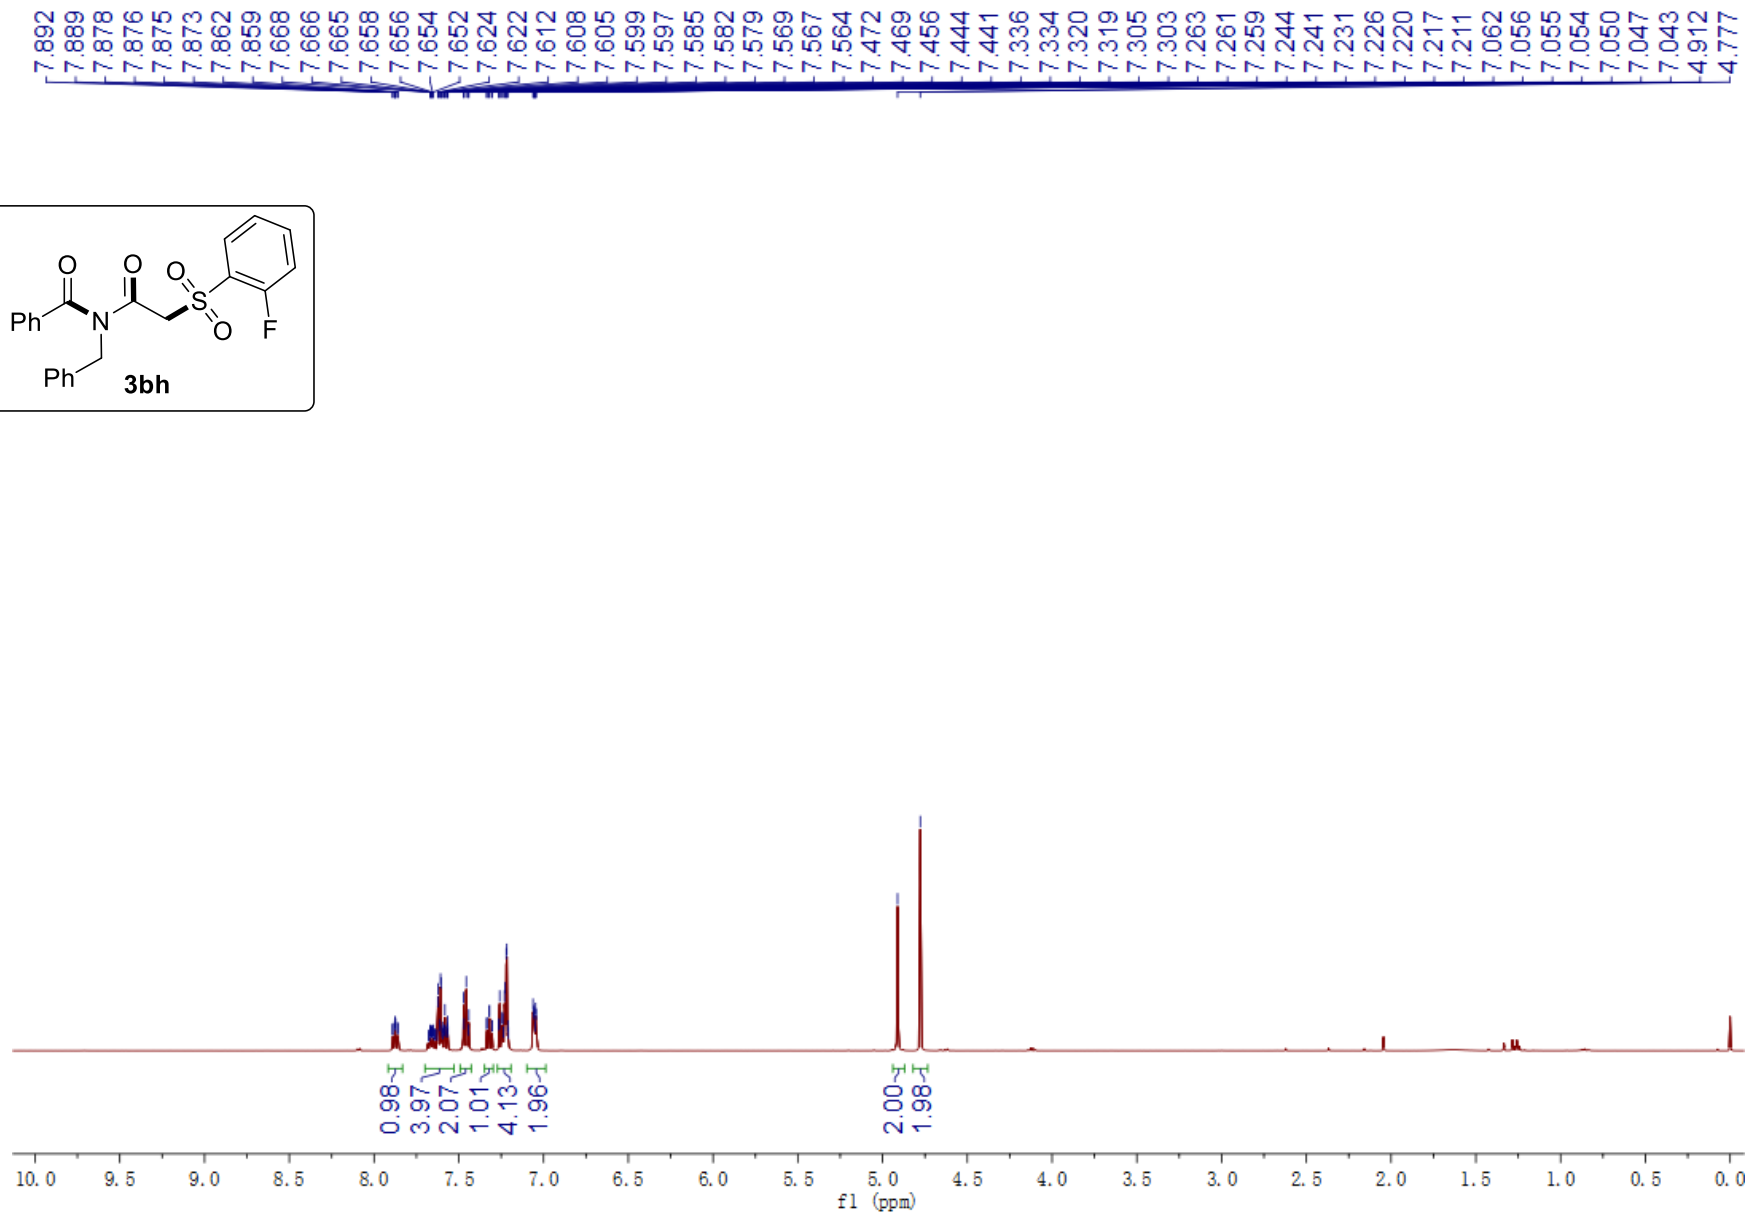

S179

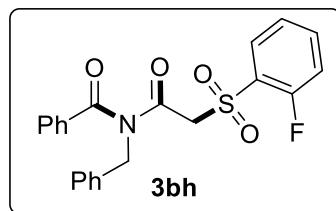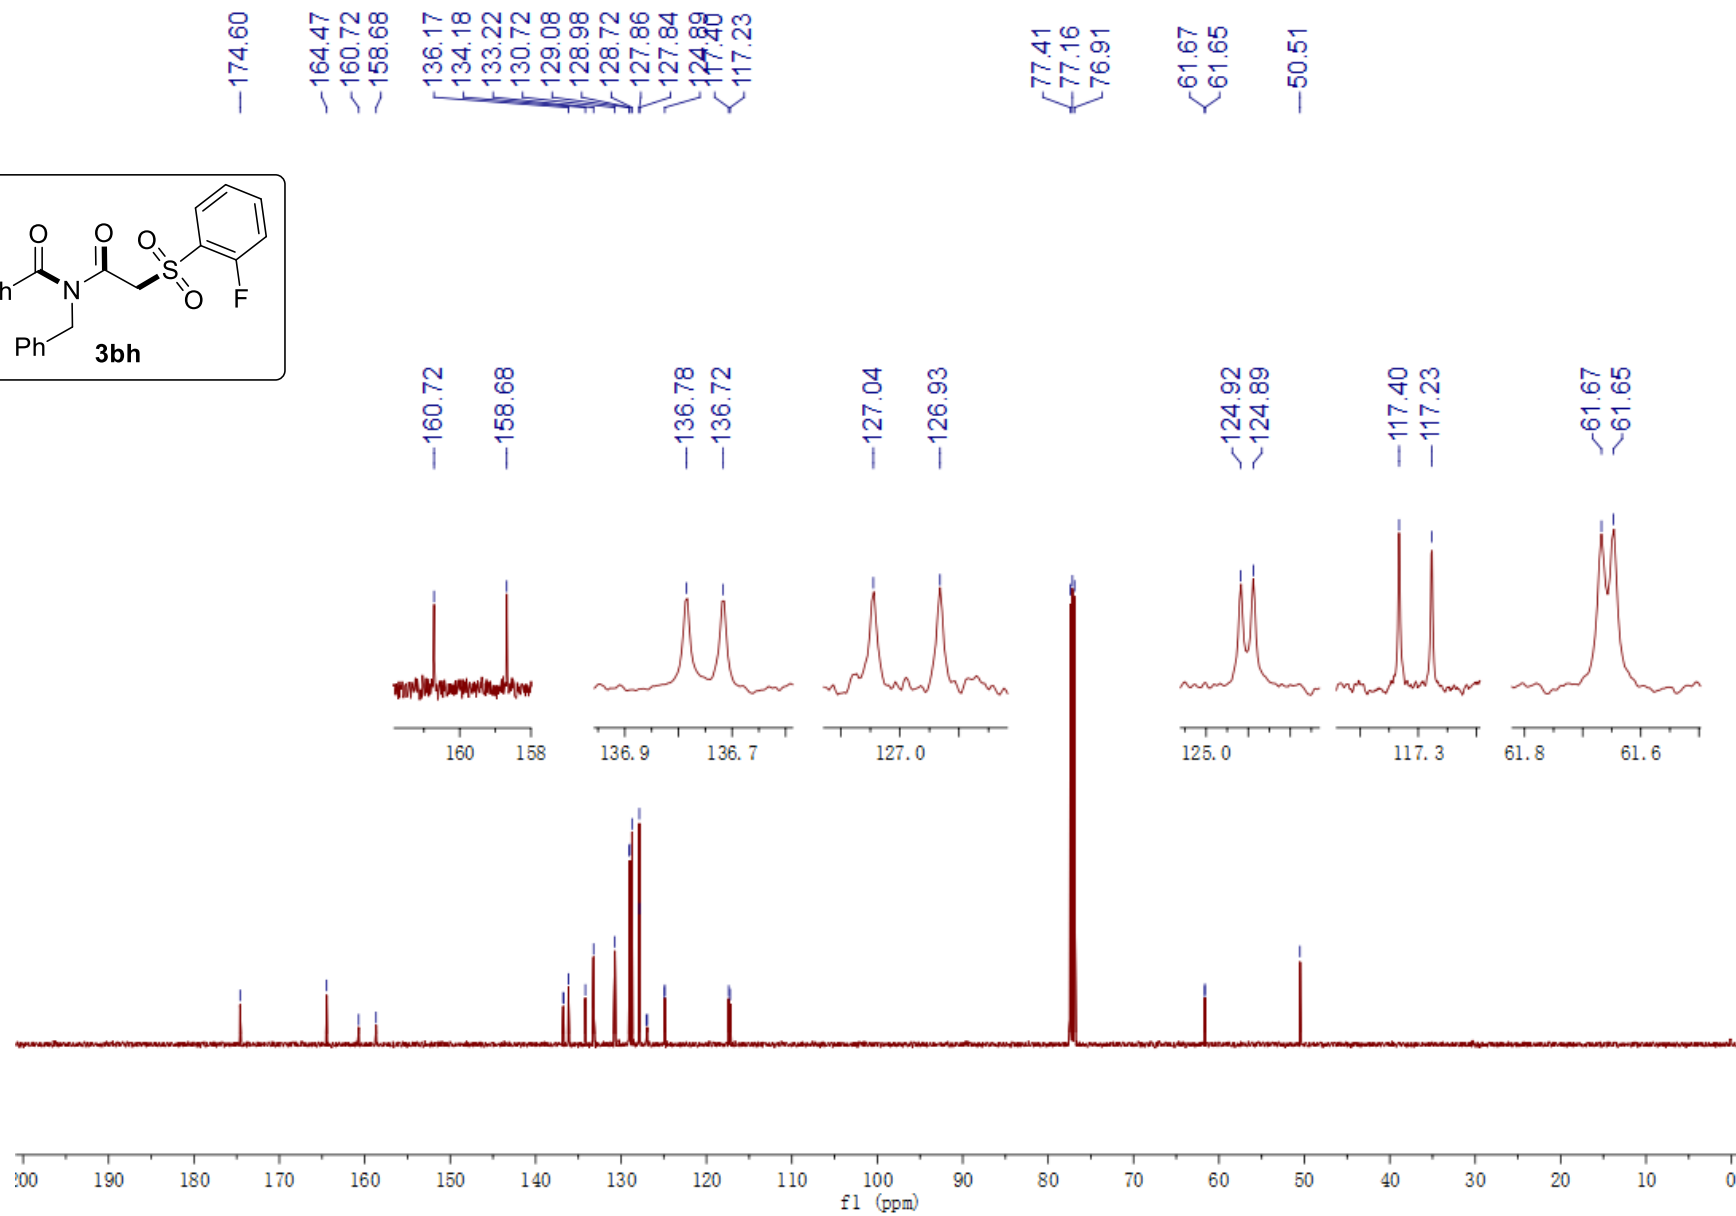

S180

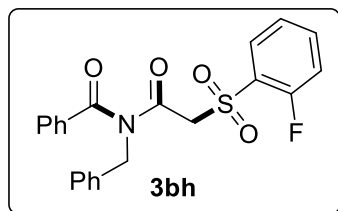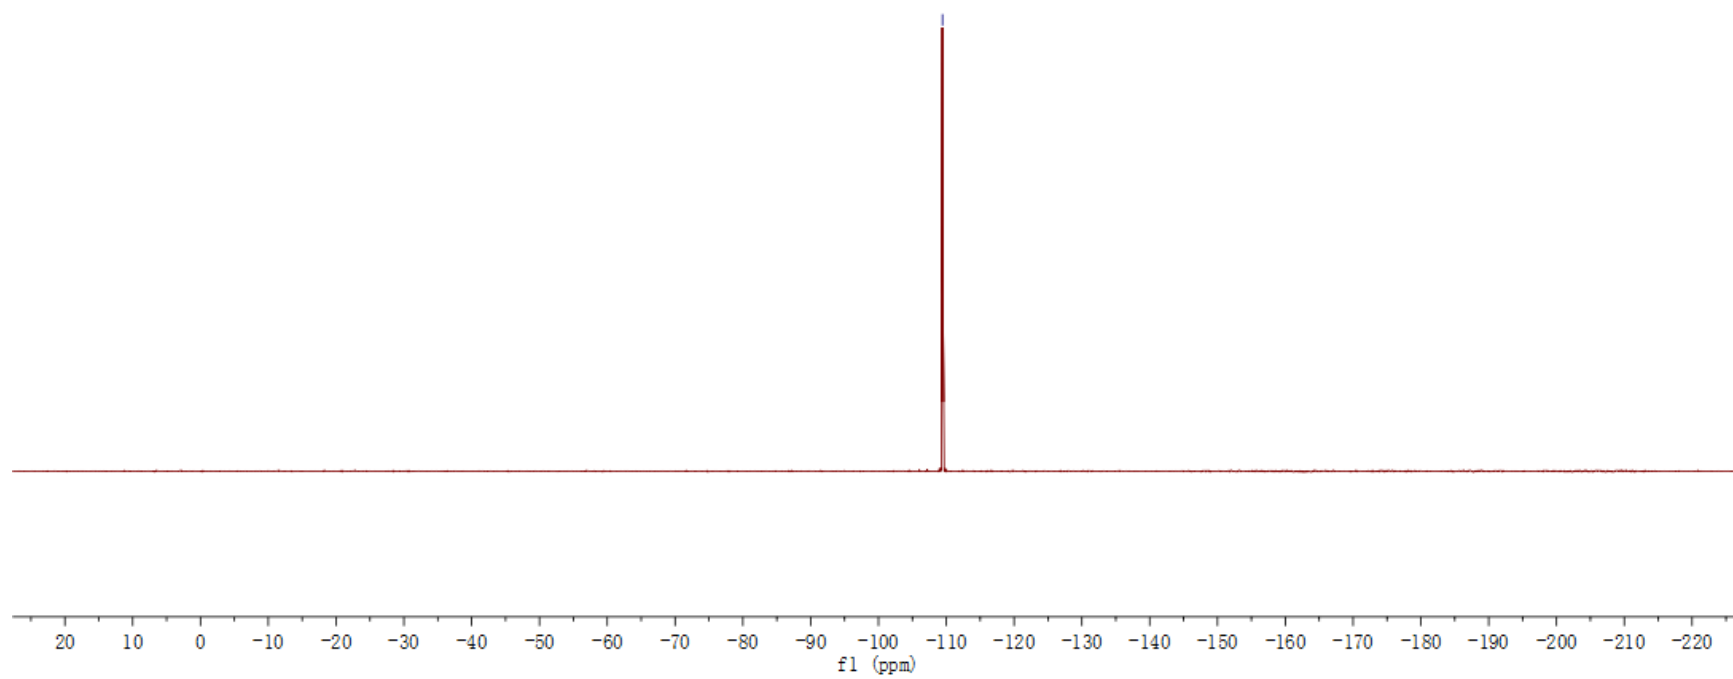

S181



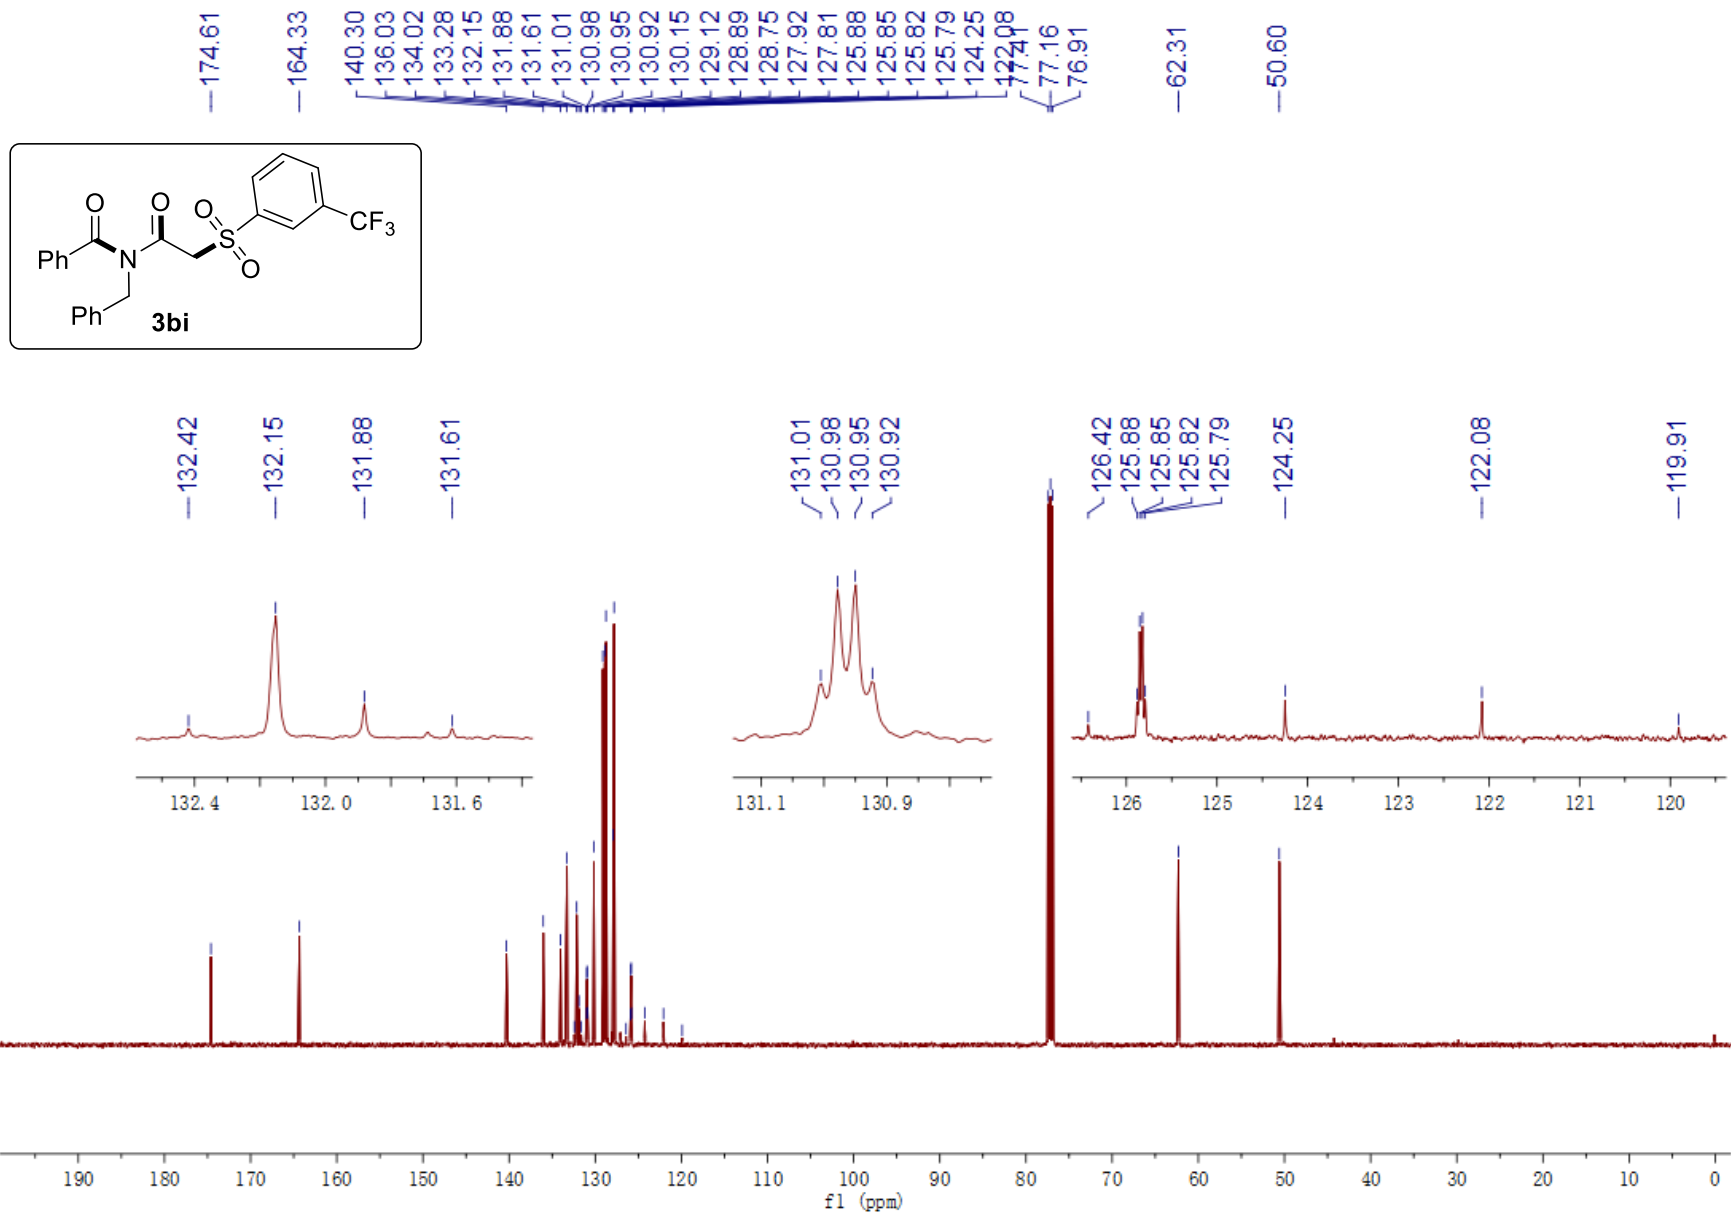

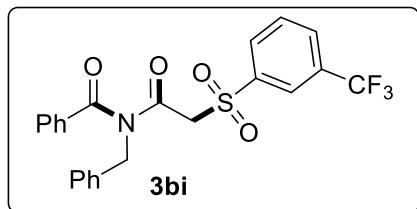

---63.275

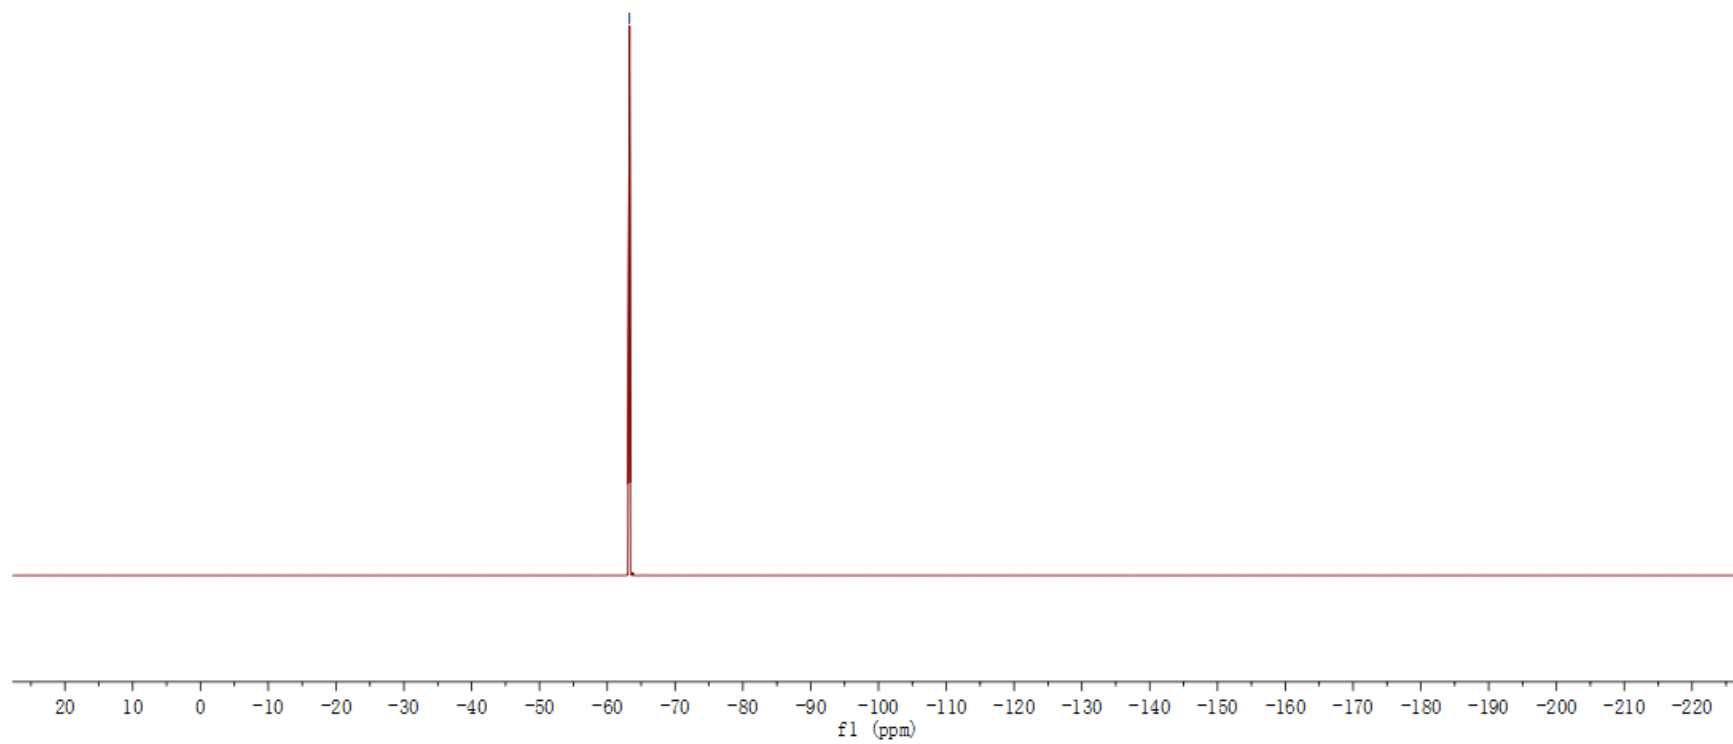

S184



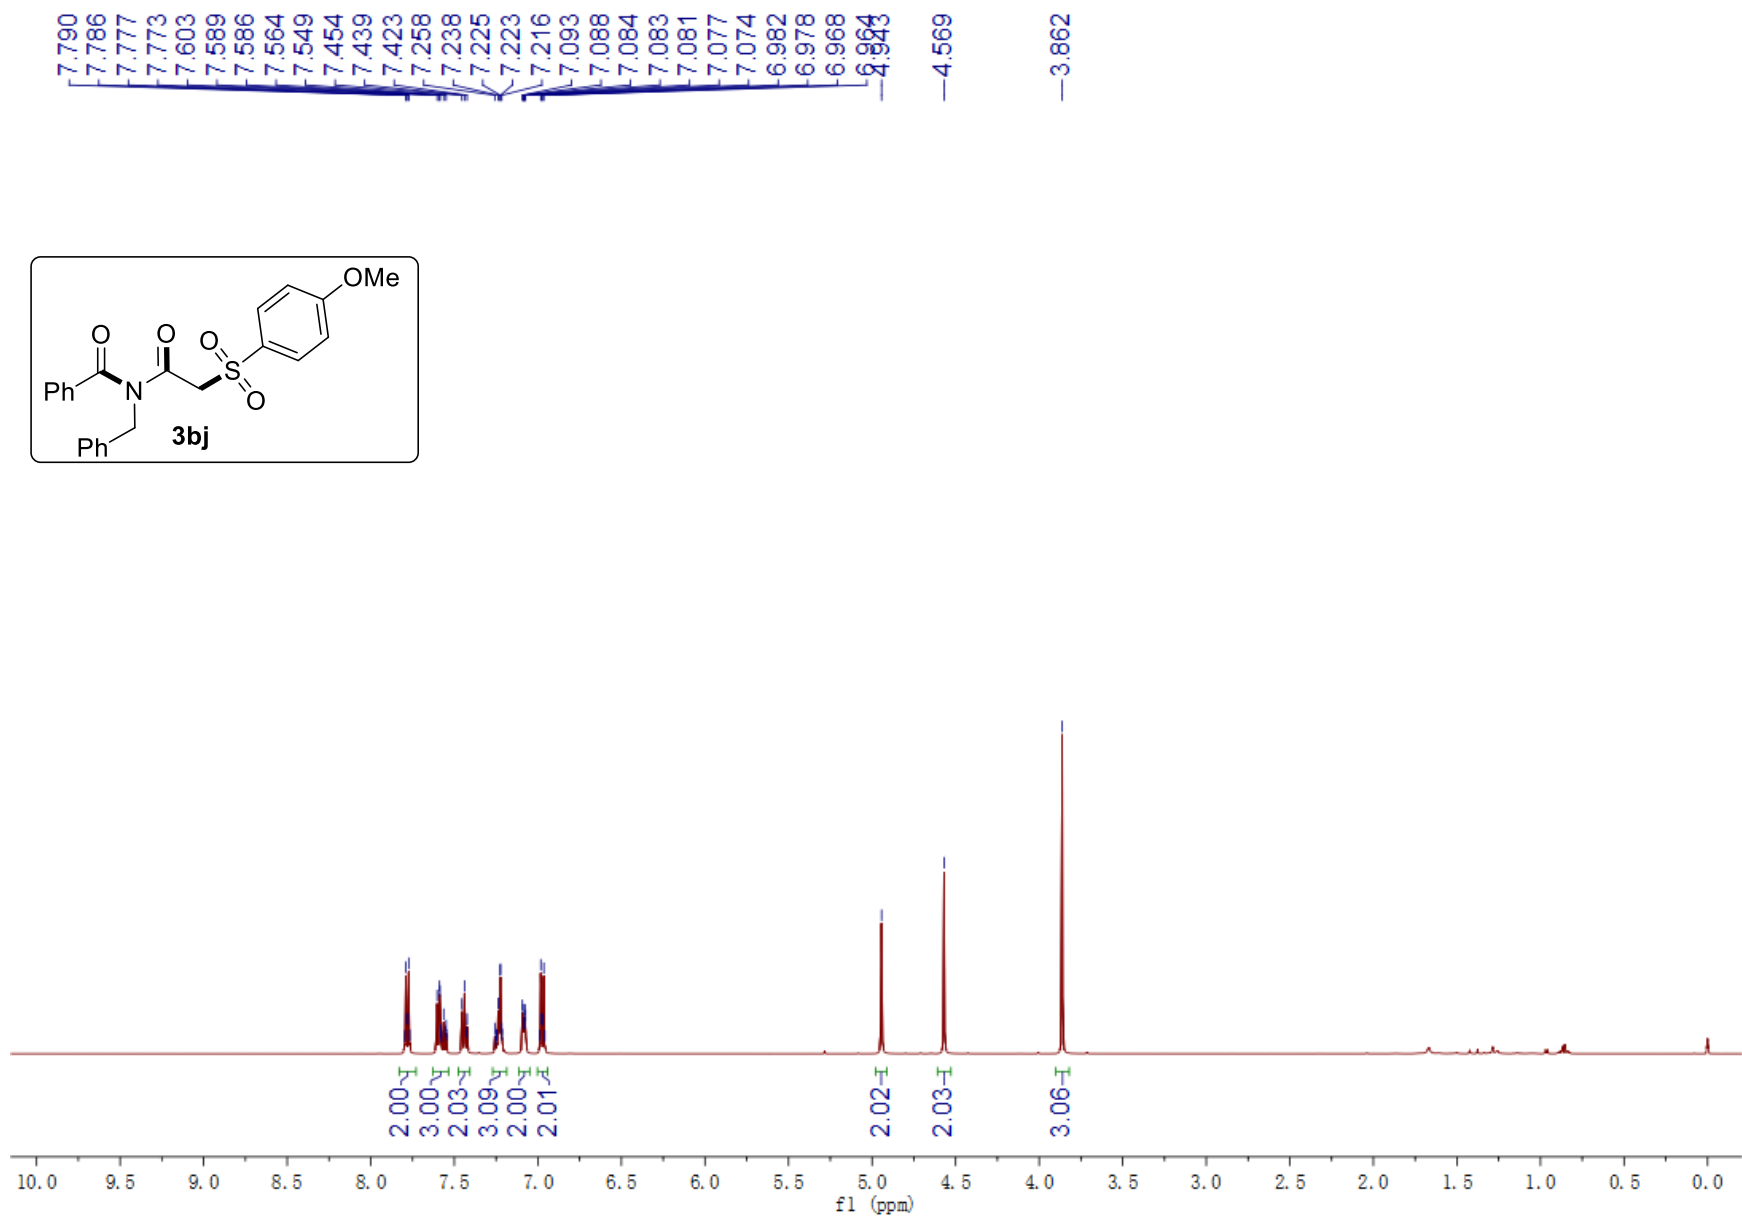

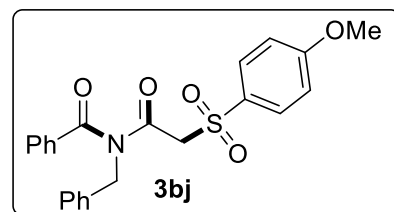

174.63

164.74  
164.18

136.26  
134.30  
133.01  
130.76  
130.42  
128.96  
128.88  
128.63  
127.87  
127.74  
114.50

77.41  
77.16  
76.91

62.55  
55.77  
50.48

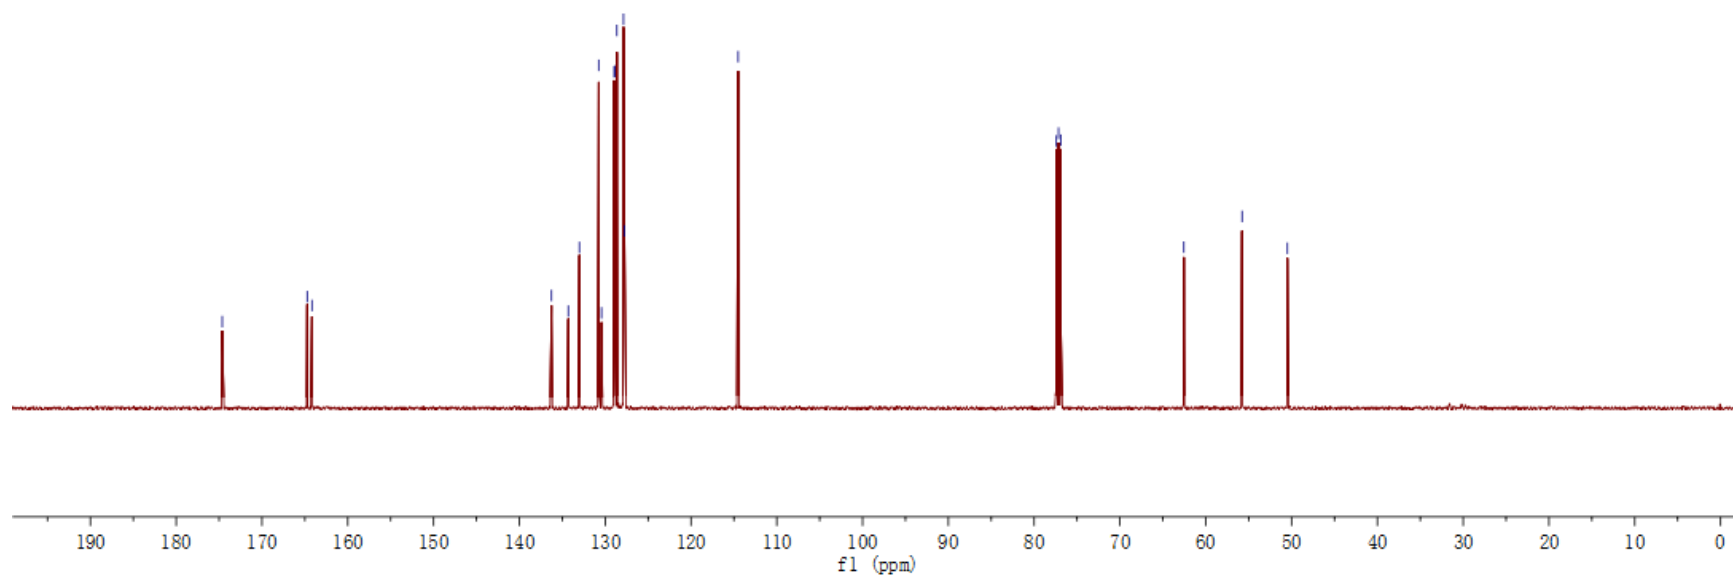

S186

7.801  
7.796  
7.792  
7.782  
7.778  
7.774  
7.599  
7.592  
7.589  
7.585  
7.583  
7.577  
7.564  
7.562  
7.560  
7.499  
7.495  
7.491  
7.481  
7.477  
7.472  
7.465  
7.450  
7.438  
7.434  
7.262  
7.256  
7.252  
7.244  
7.240  
7.234  
7.230  
7.221  
7.073  
7.066  
7.065  
7.058  
7.054

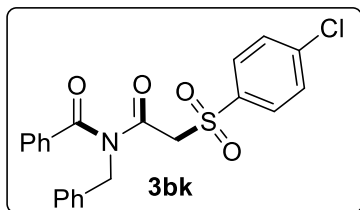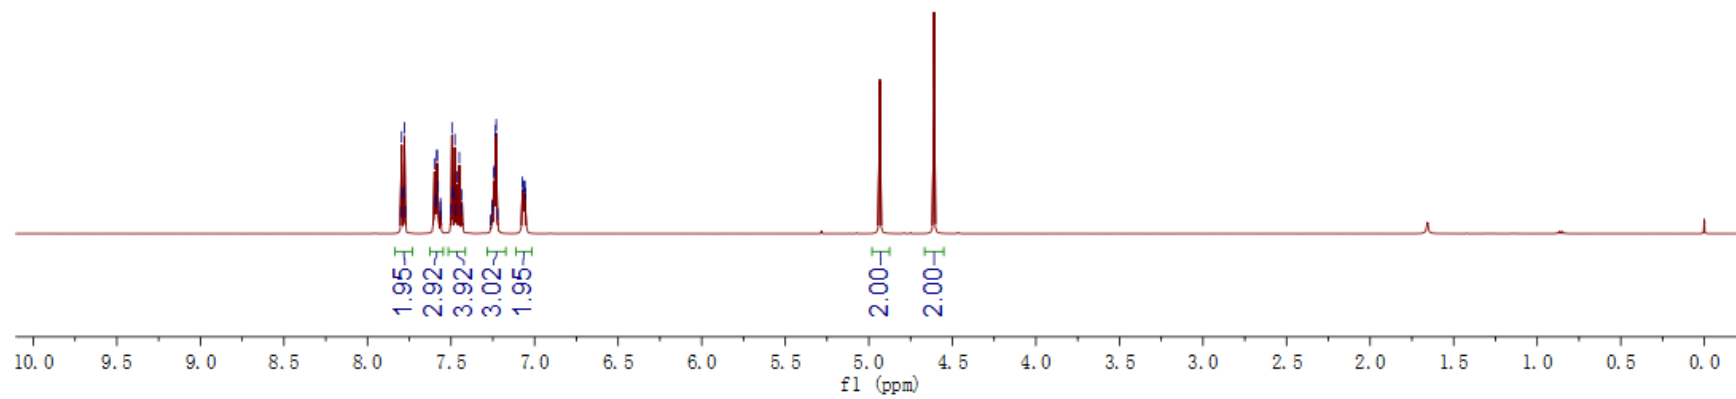

S187

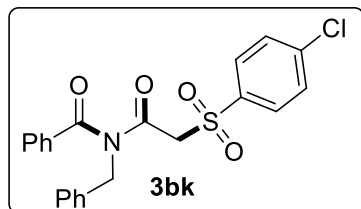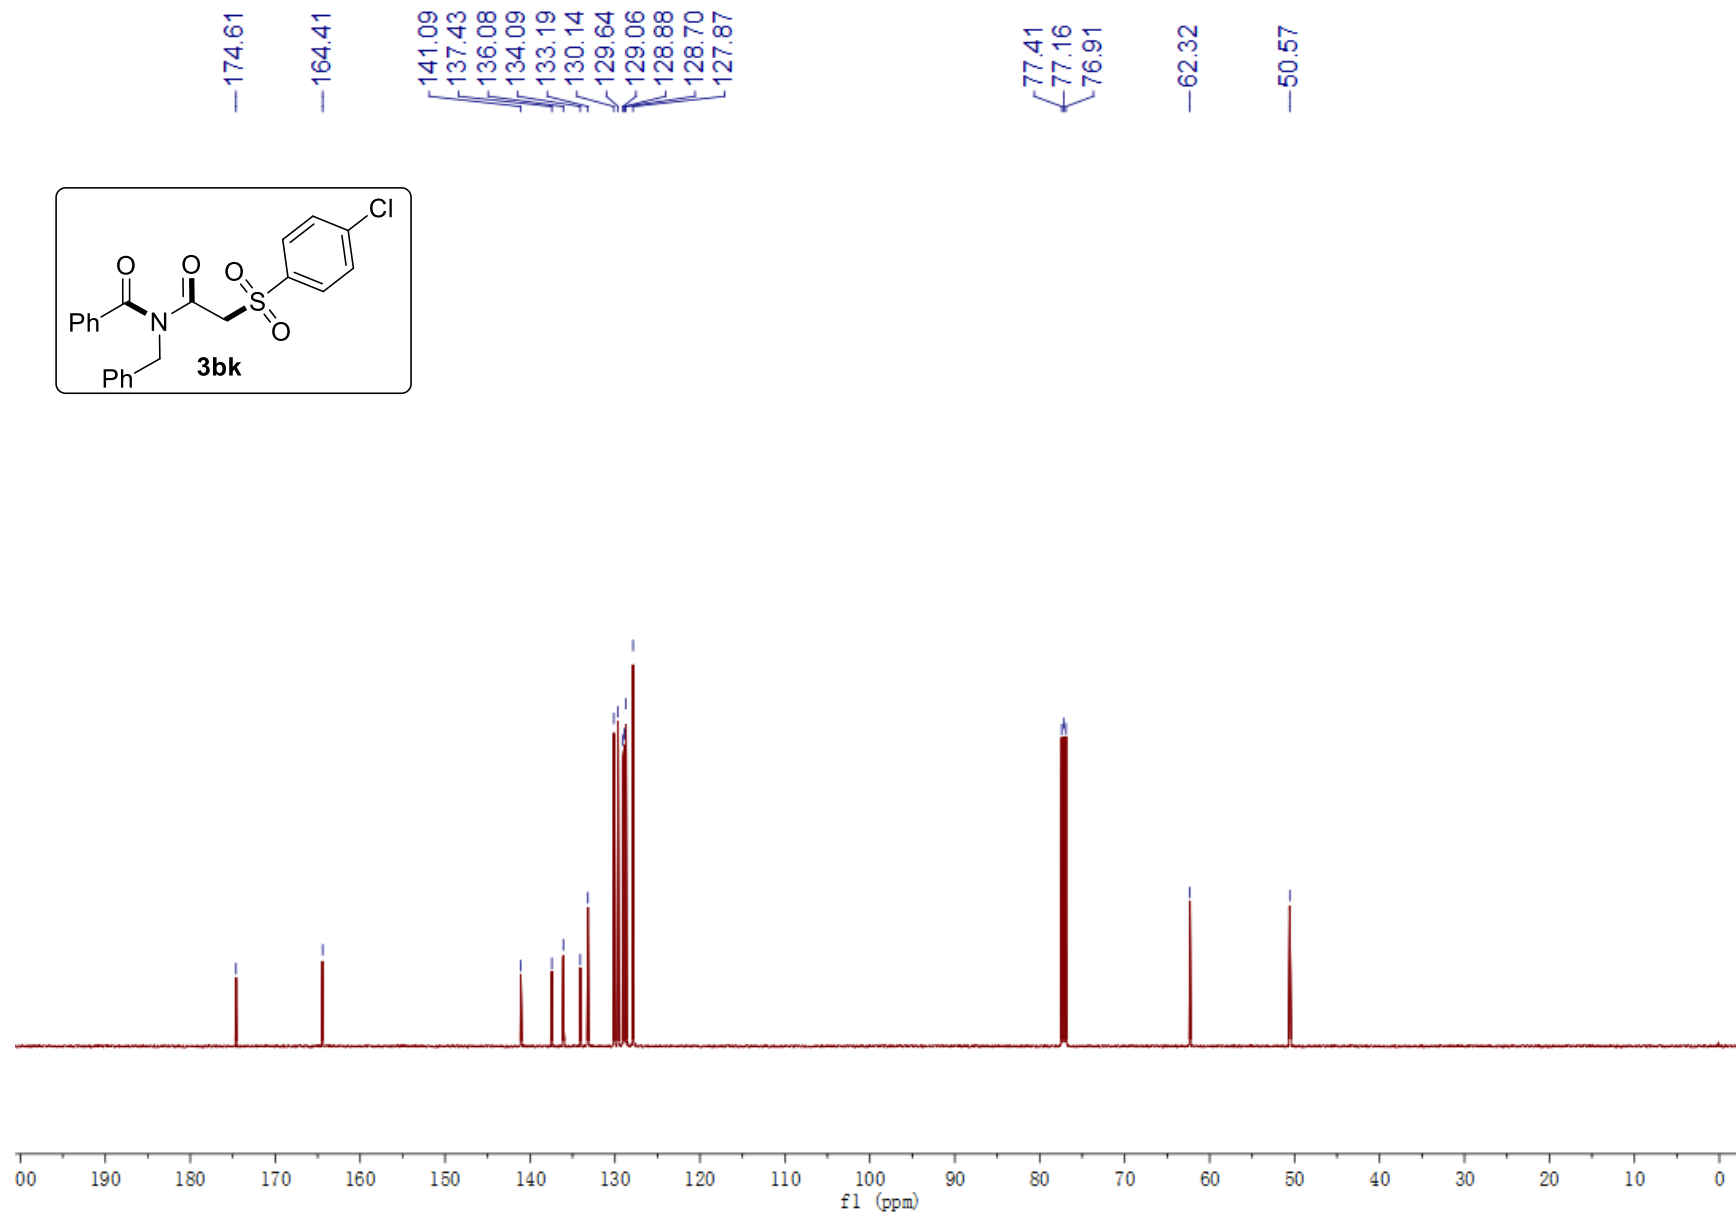

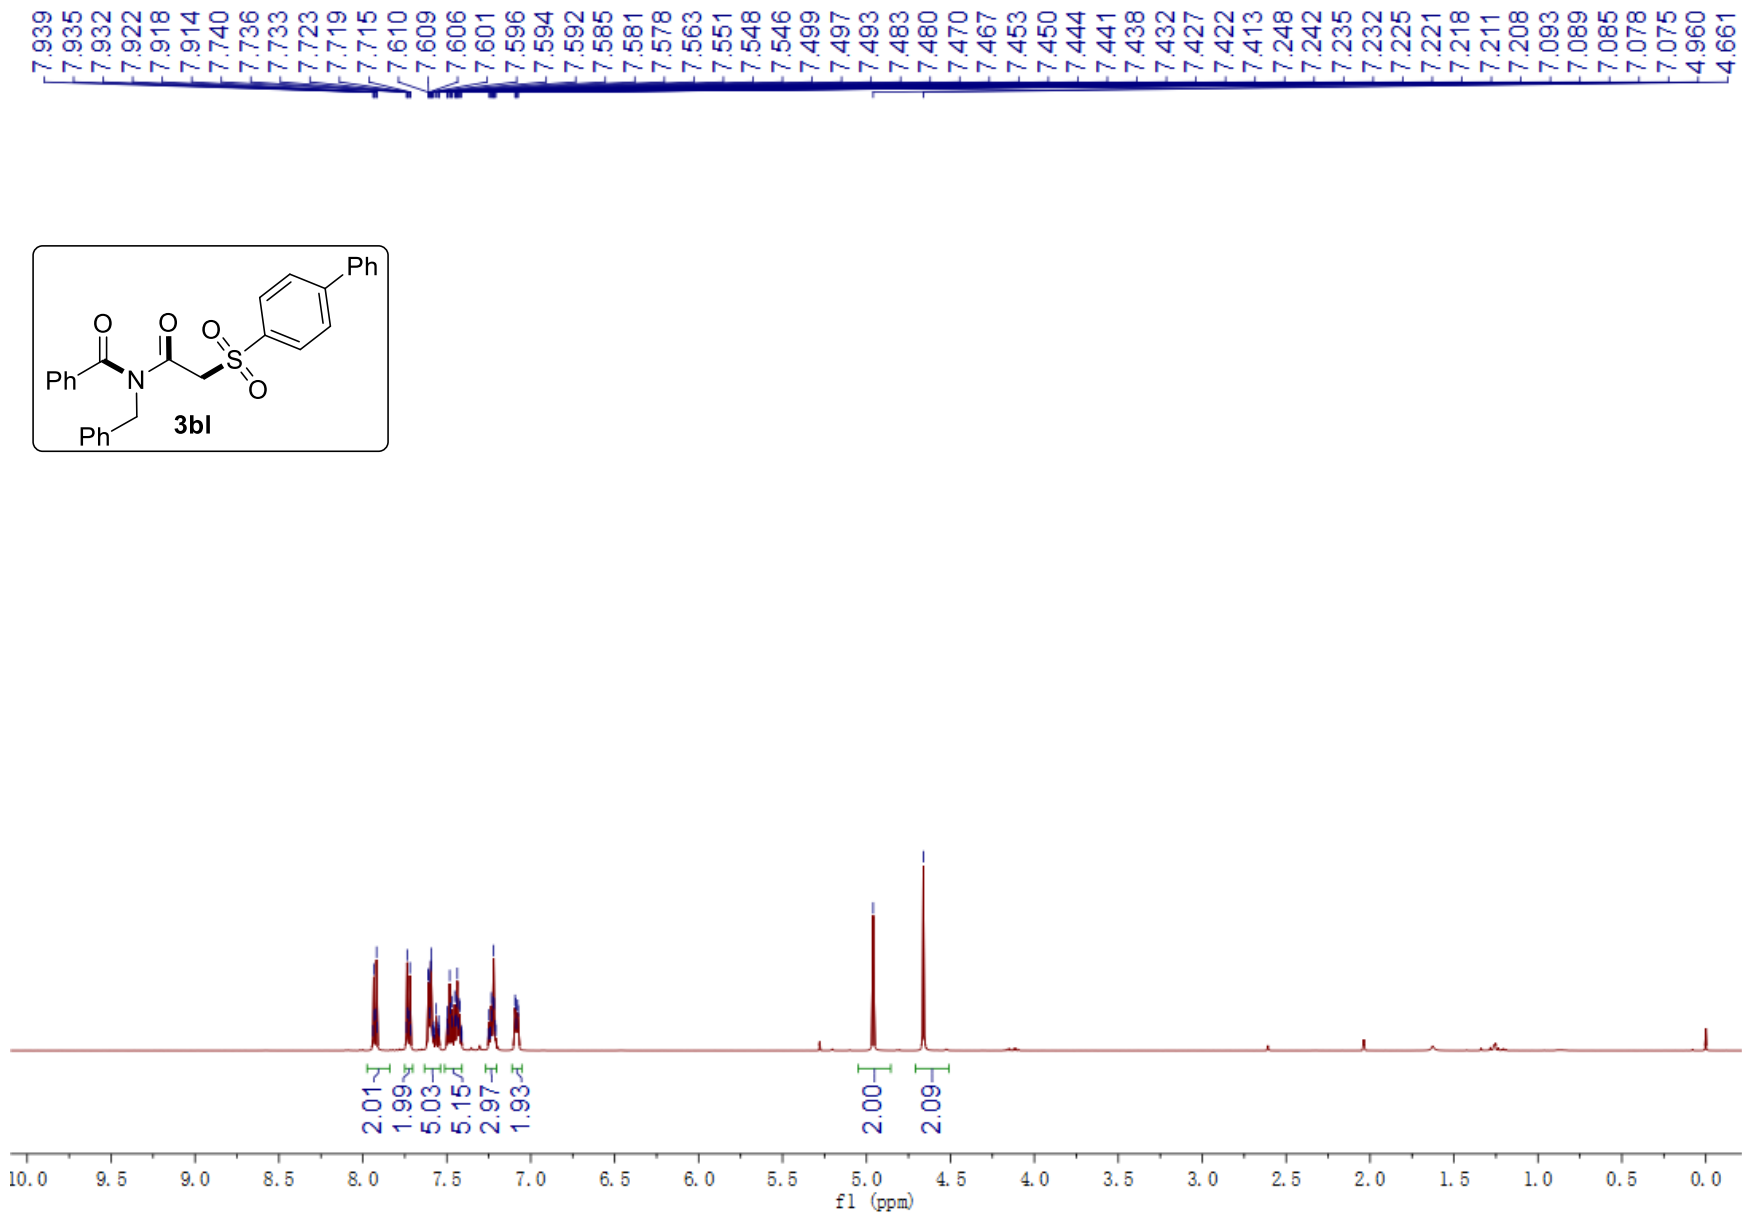

S189

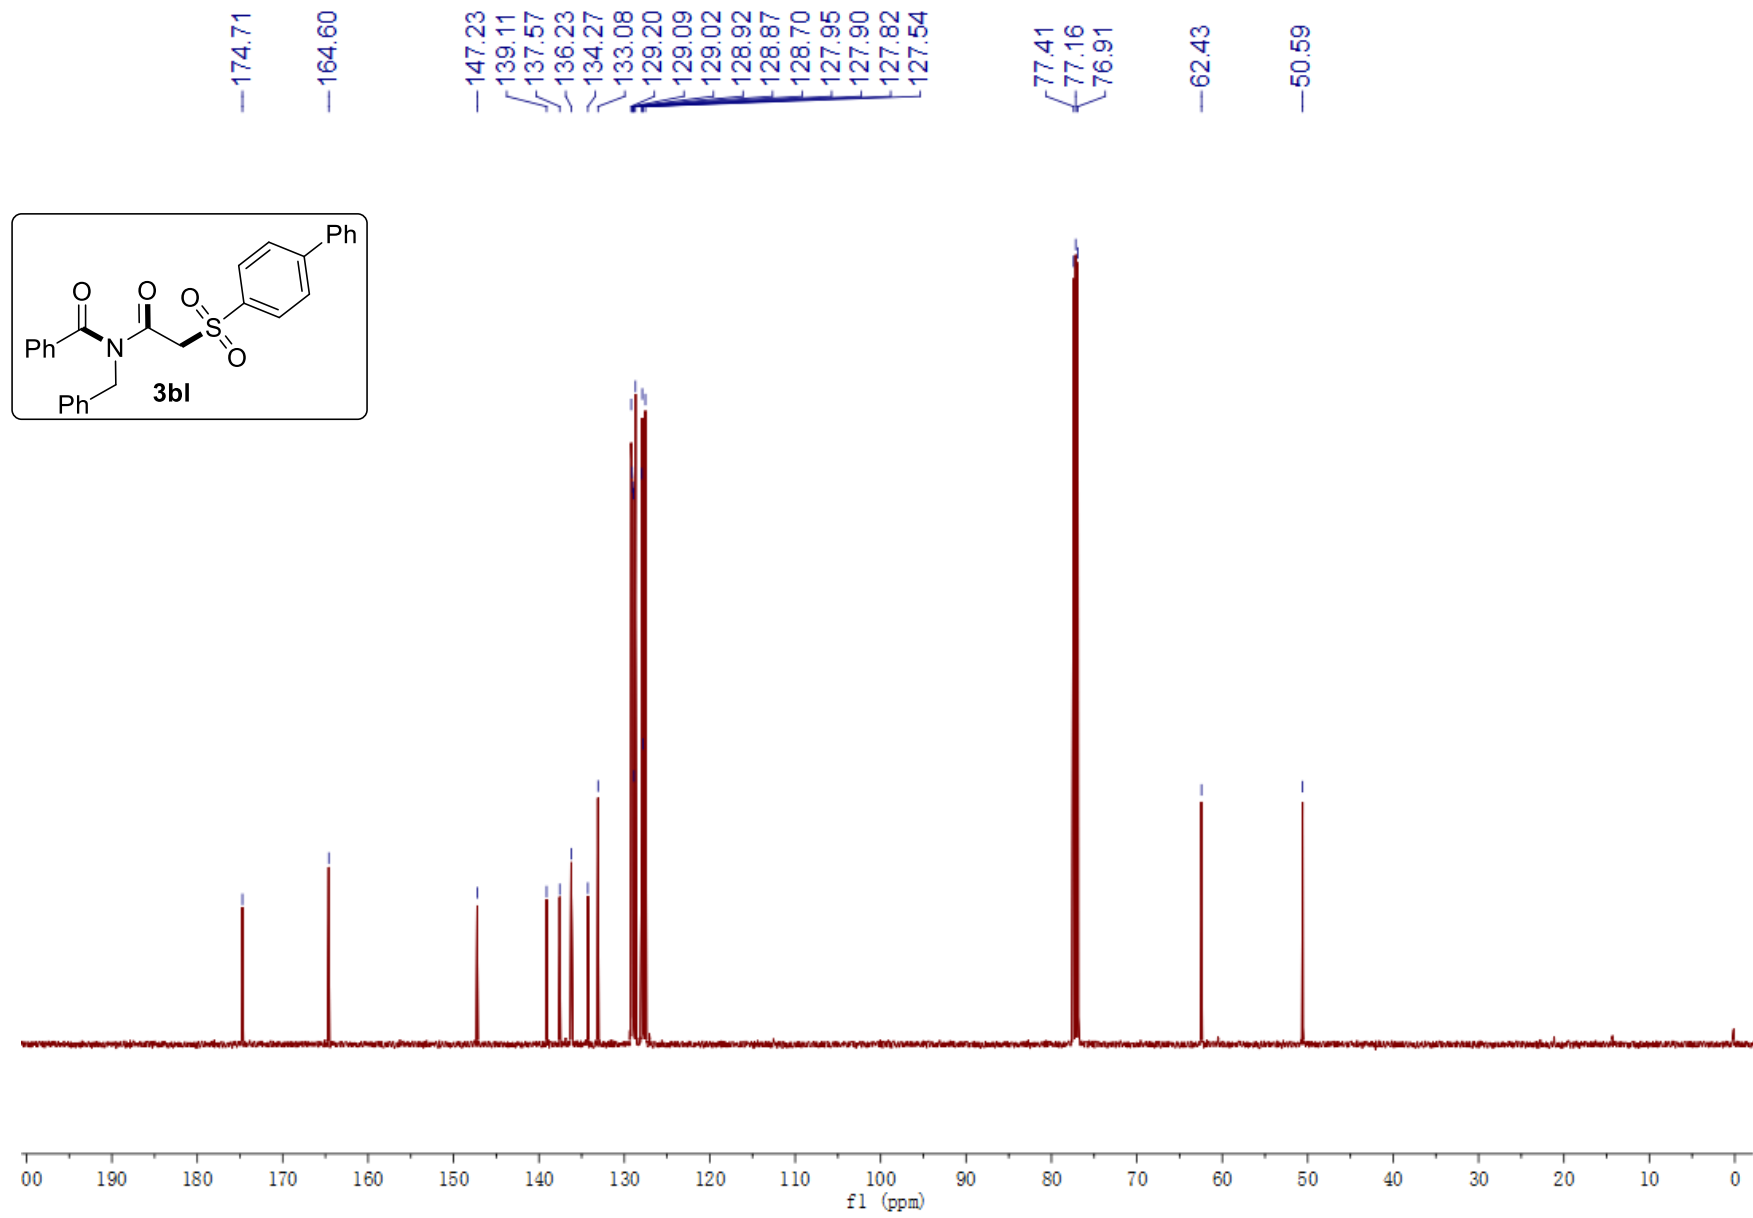

S190

7.641  
7.639  
7.628  
7.625  
7.622  
7.603  
7.591  
7.588  
7.584  
7.575  
7.573  
7.570  
7.474  
7.471  
7.458  
7.447  
7.443  
7.292  
7.287  
7.274  
7.271  
7.260  
7.254  
7.251  
7.240  
7.133  
7.129  
7.116  
-4.995  
-4.420  
-4.419  
-3.114

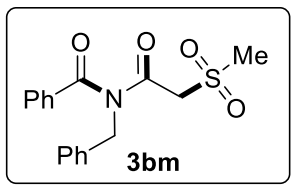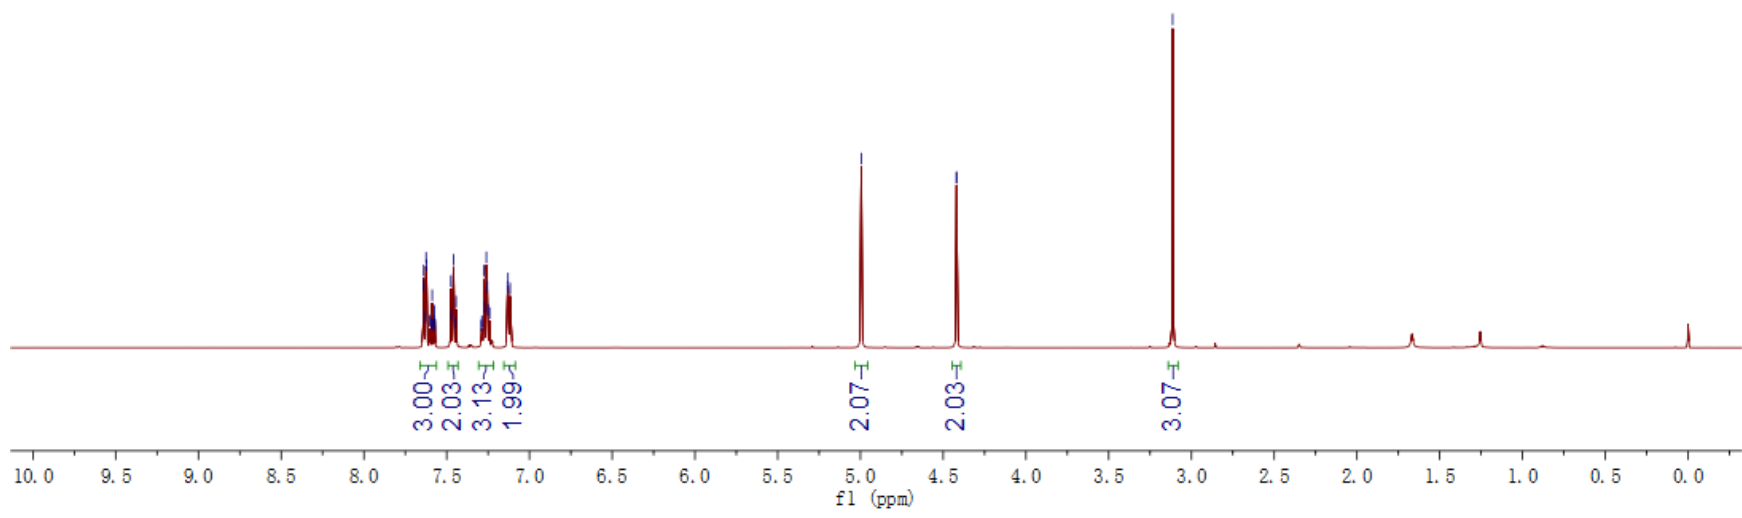

S191

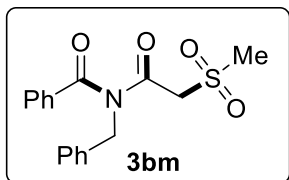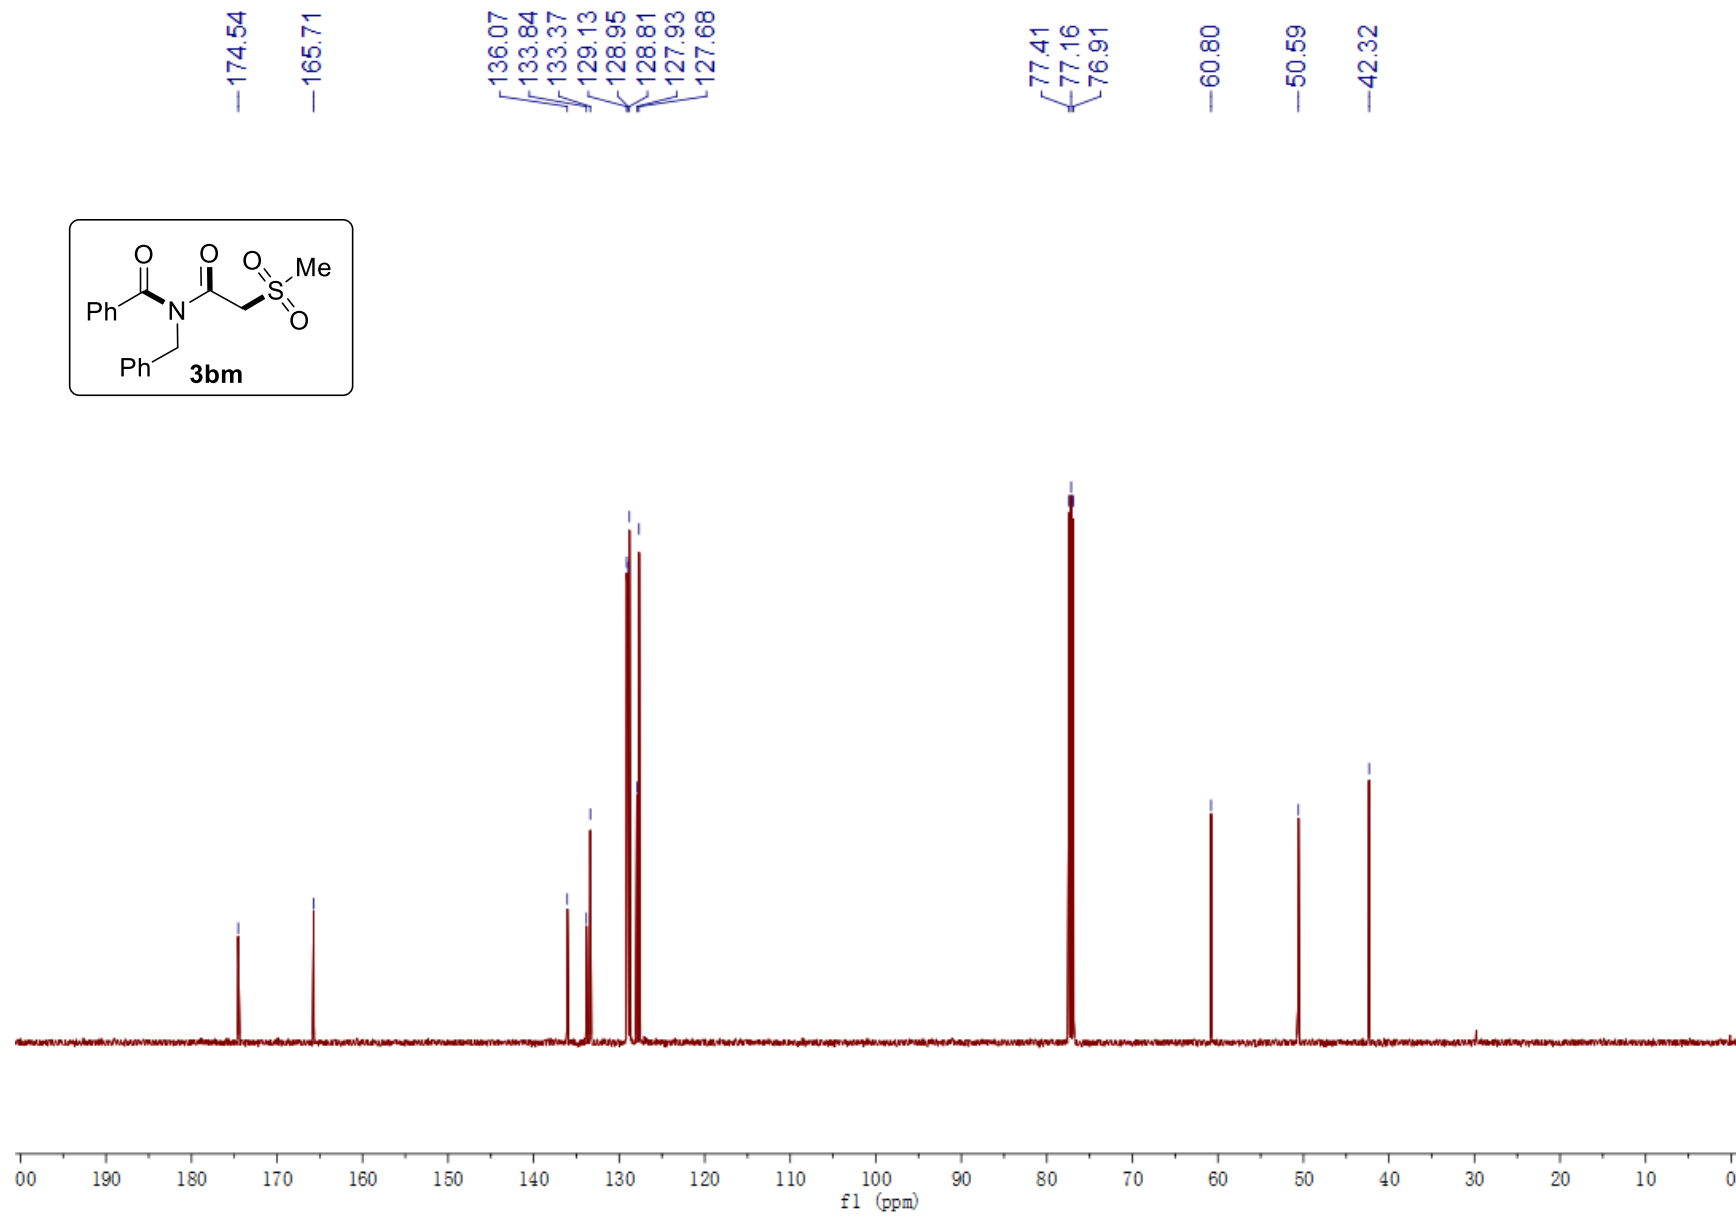

S192



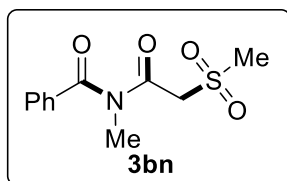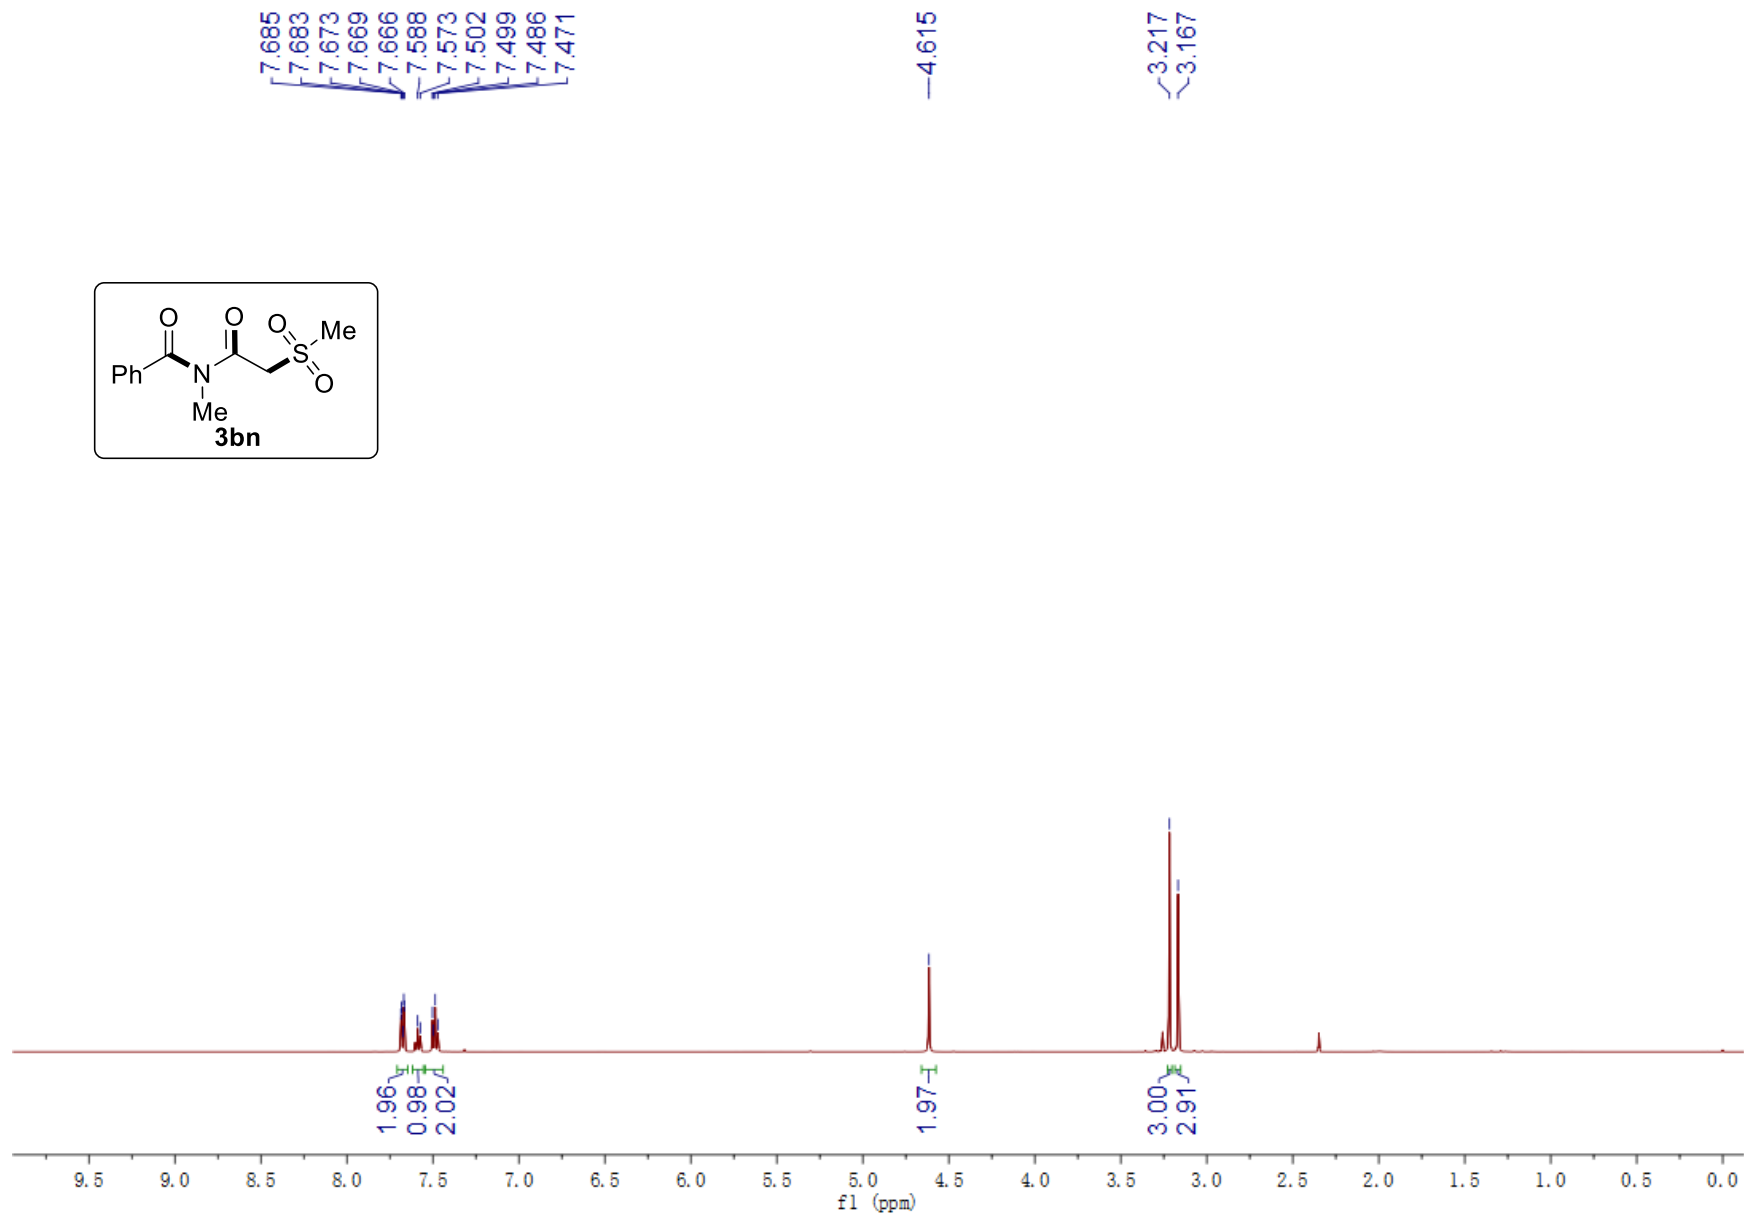

S193

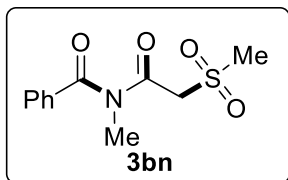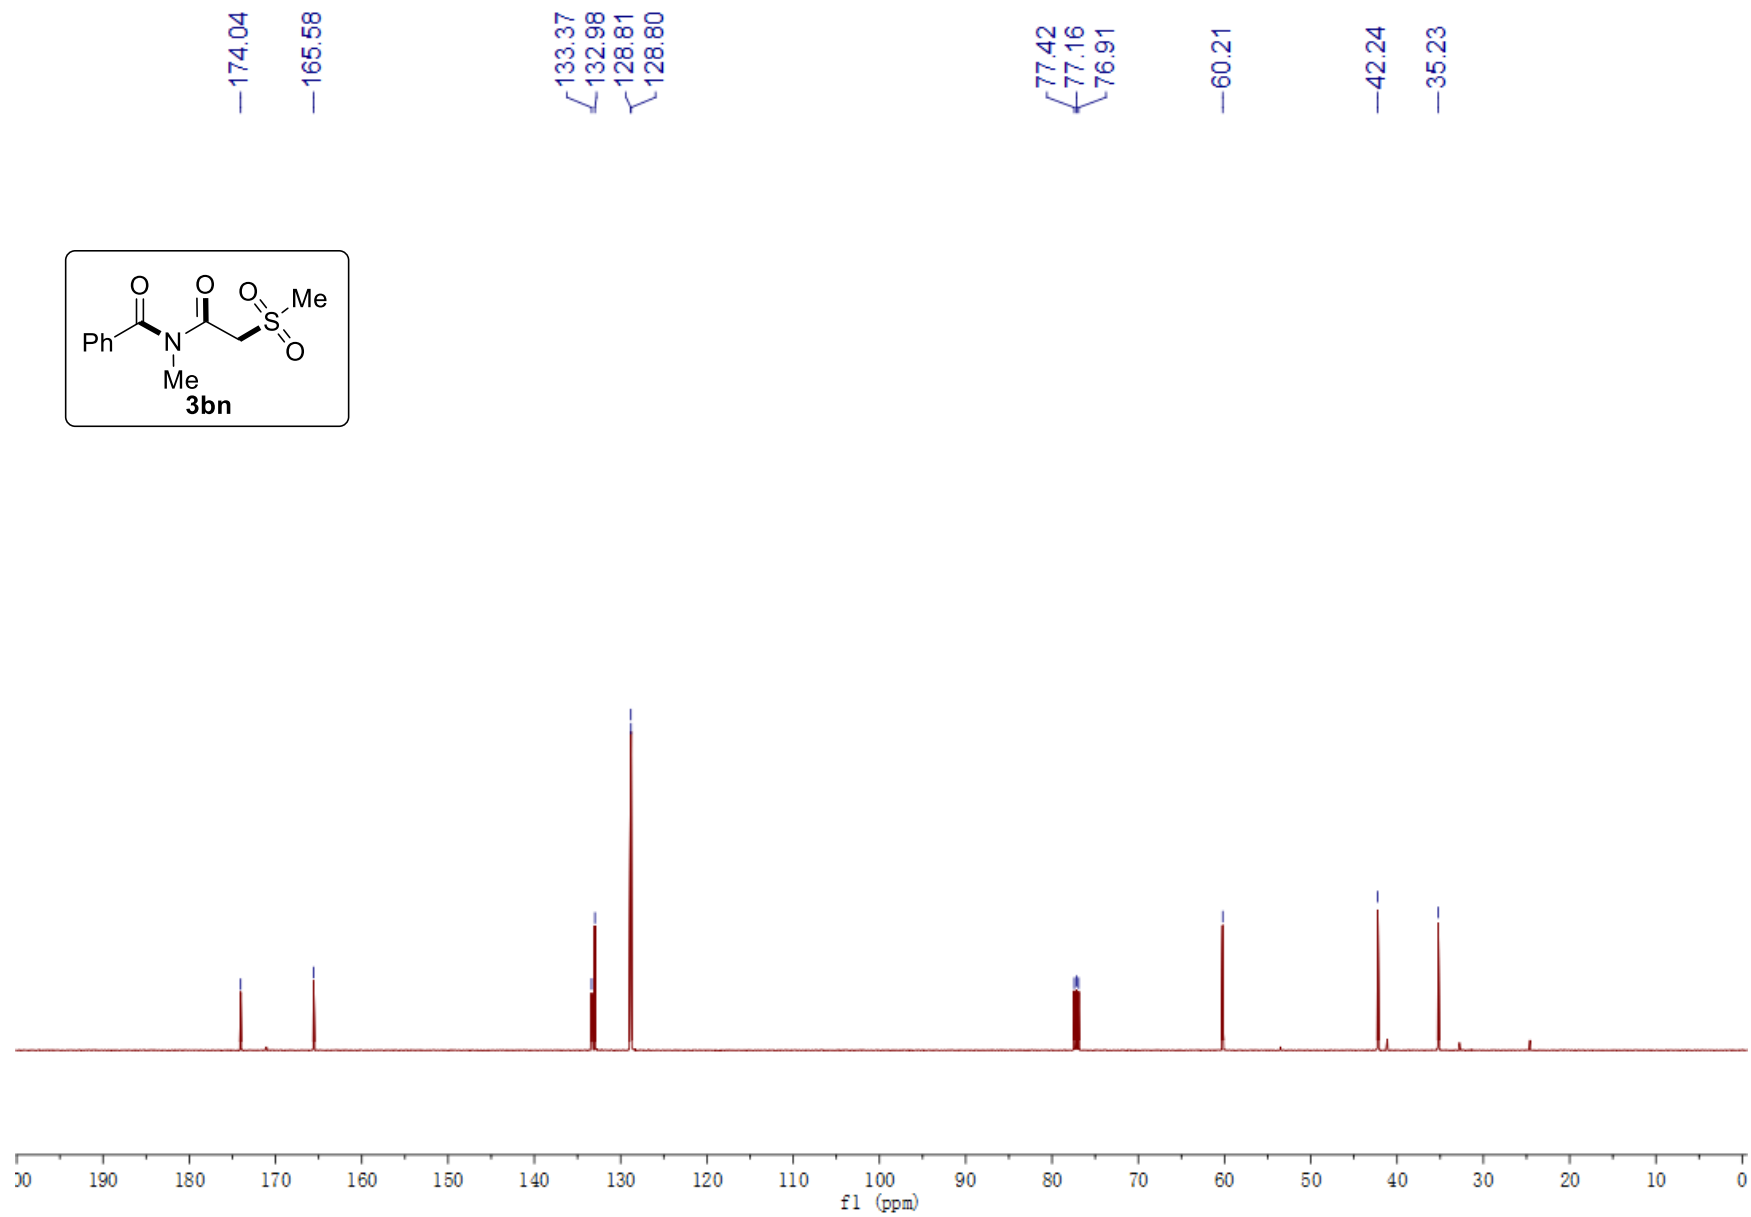

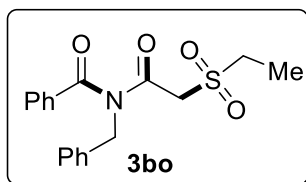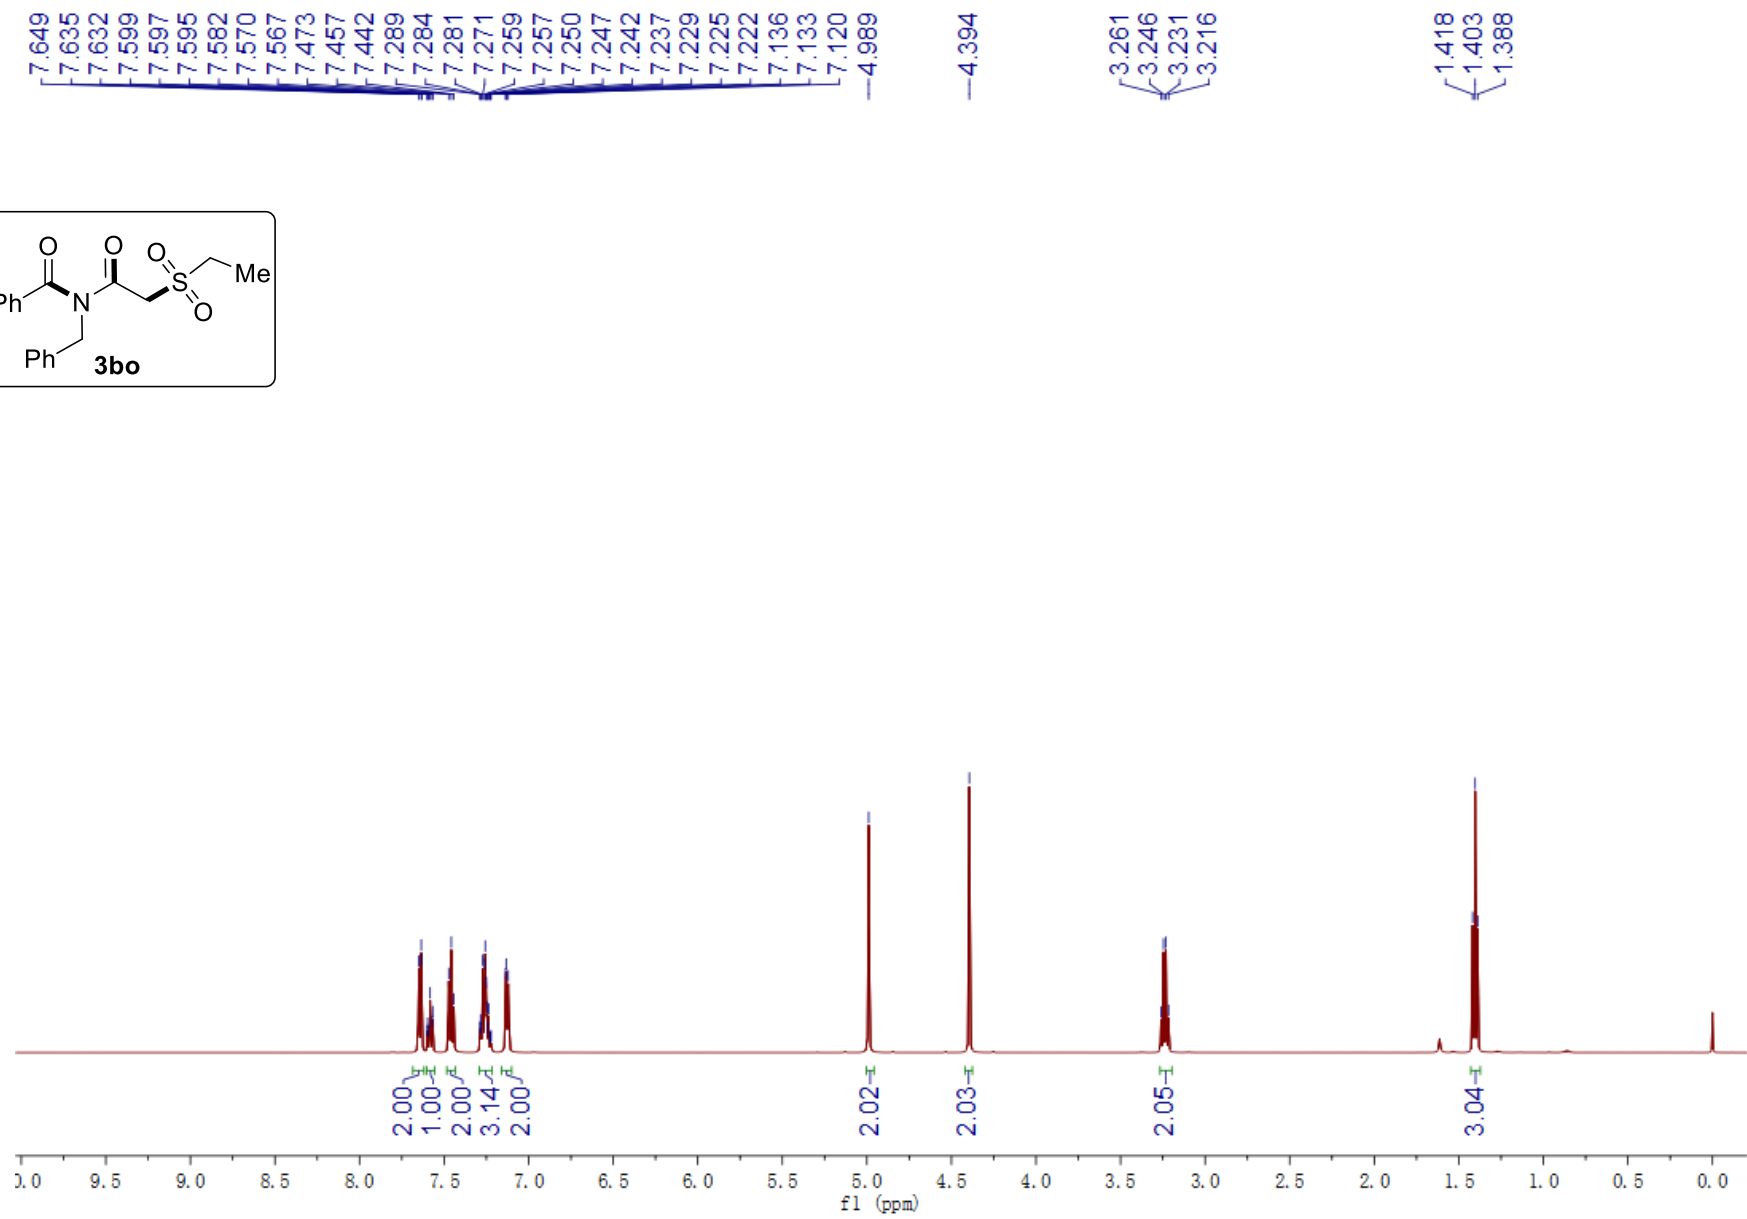

S195

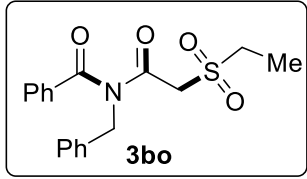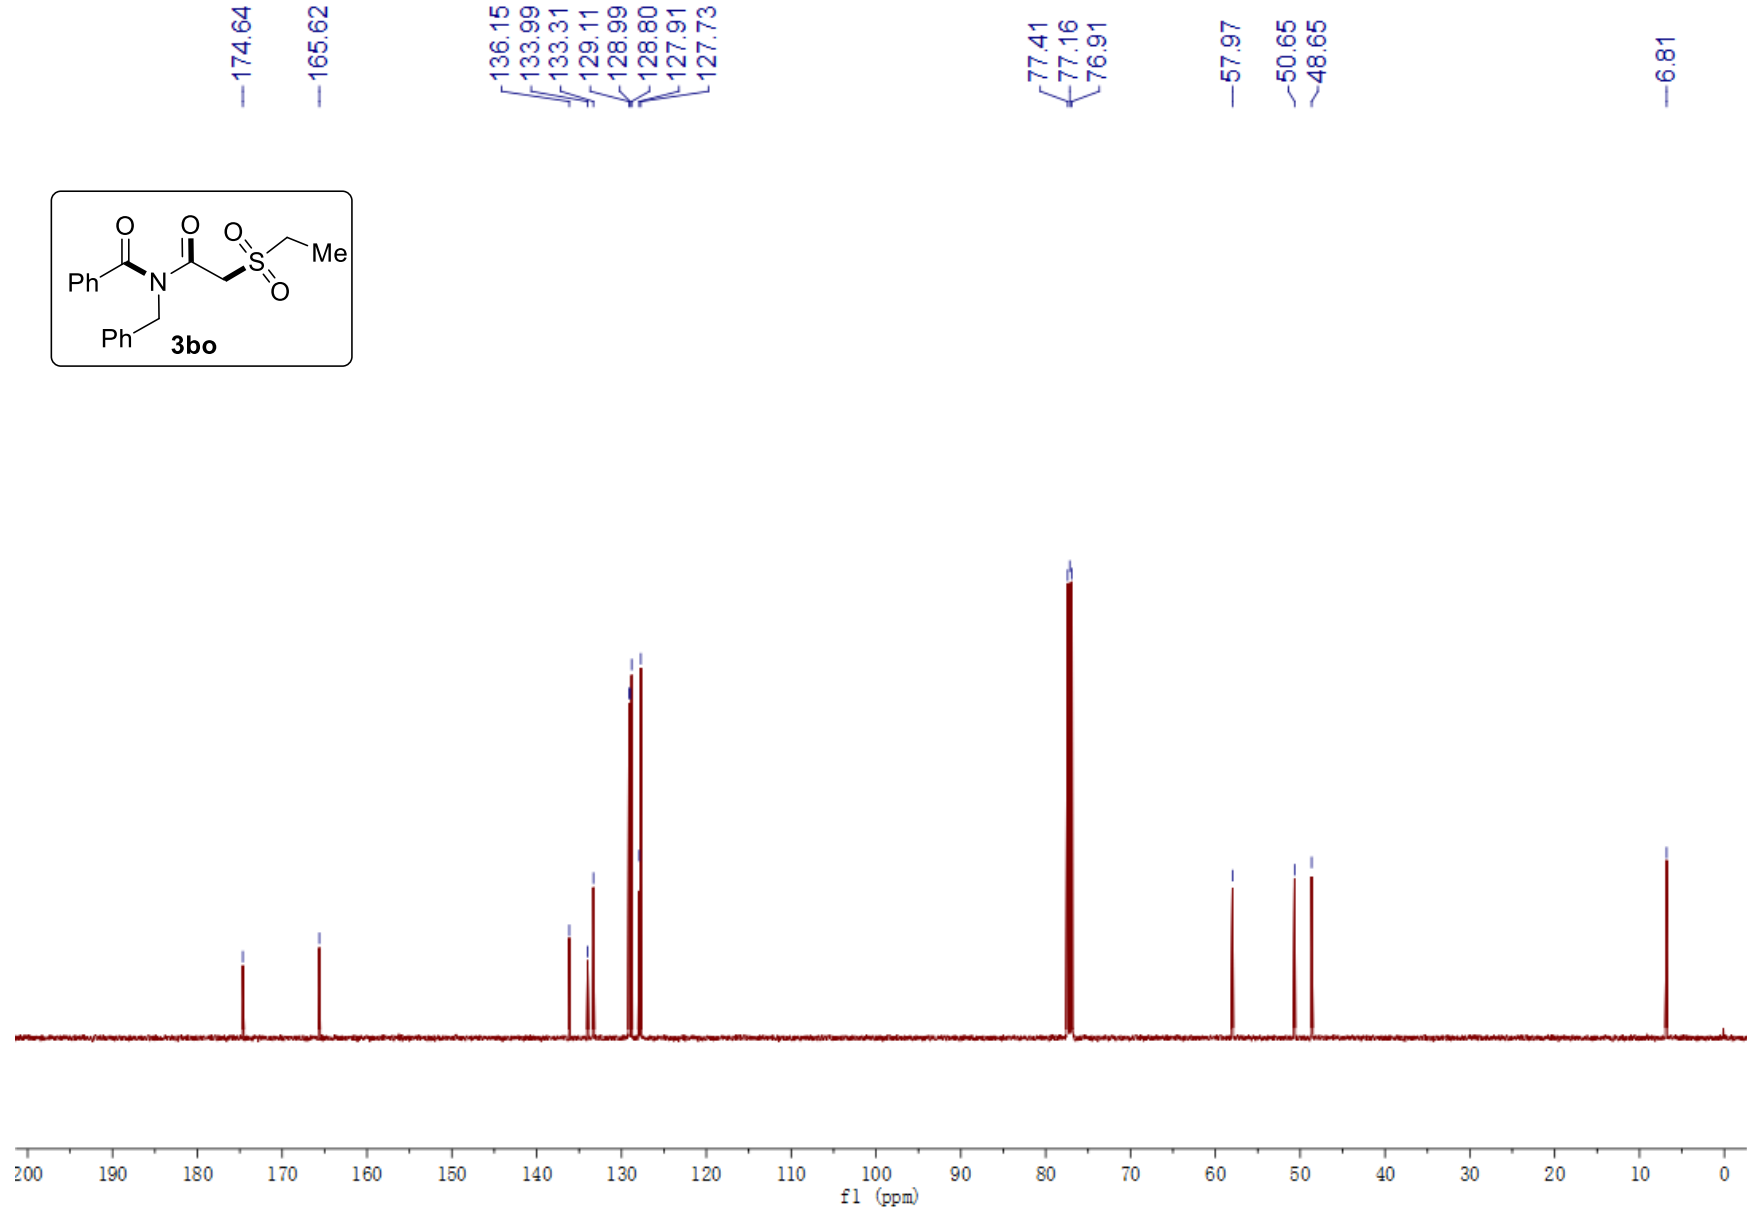

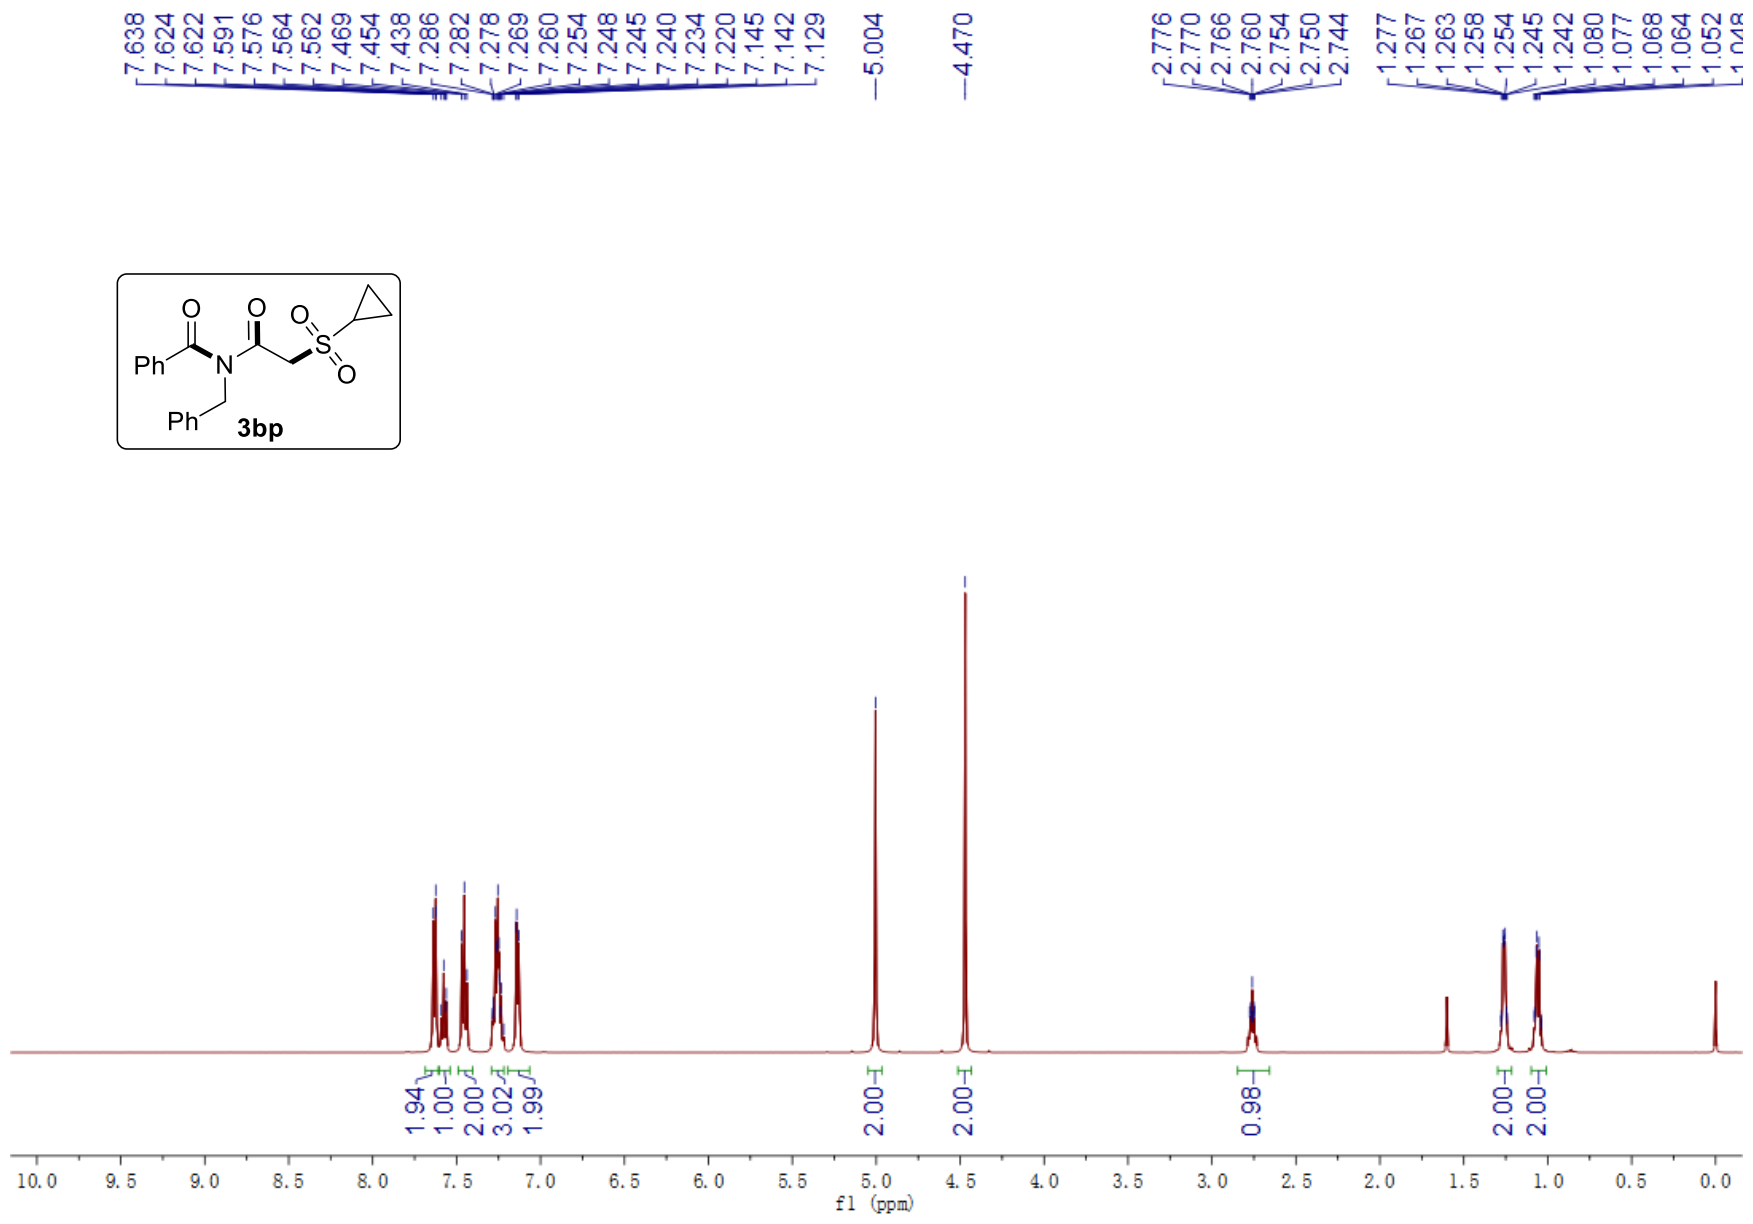

S197

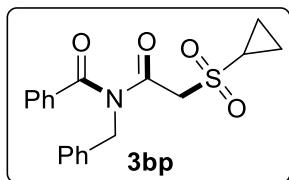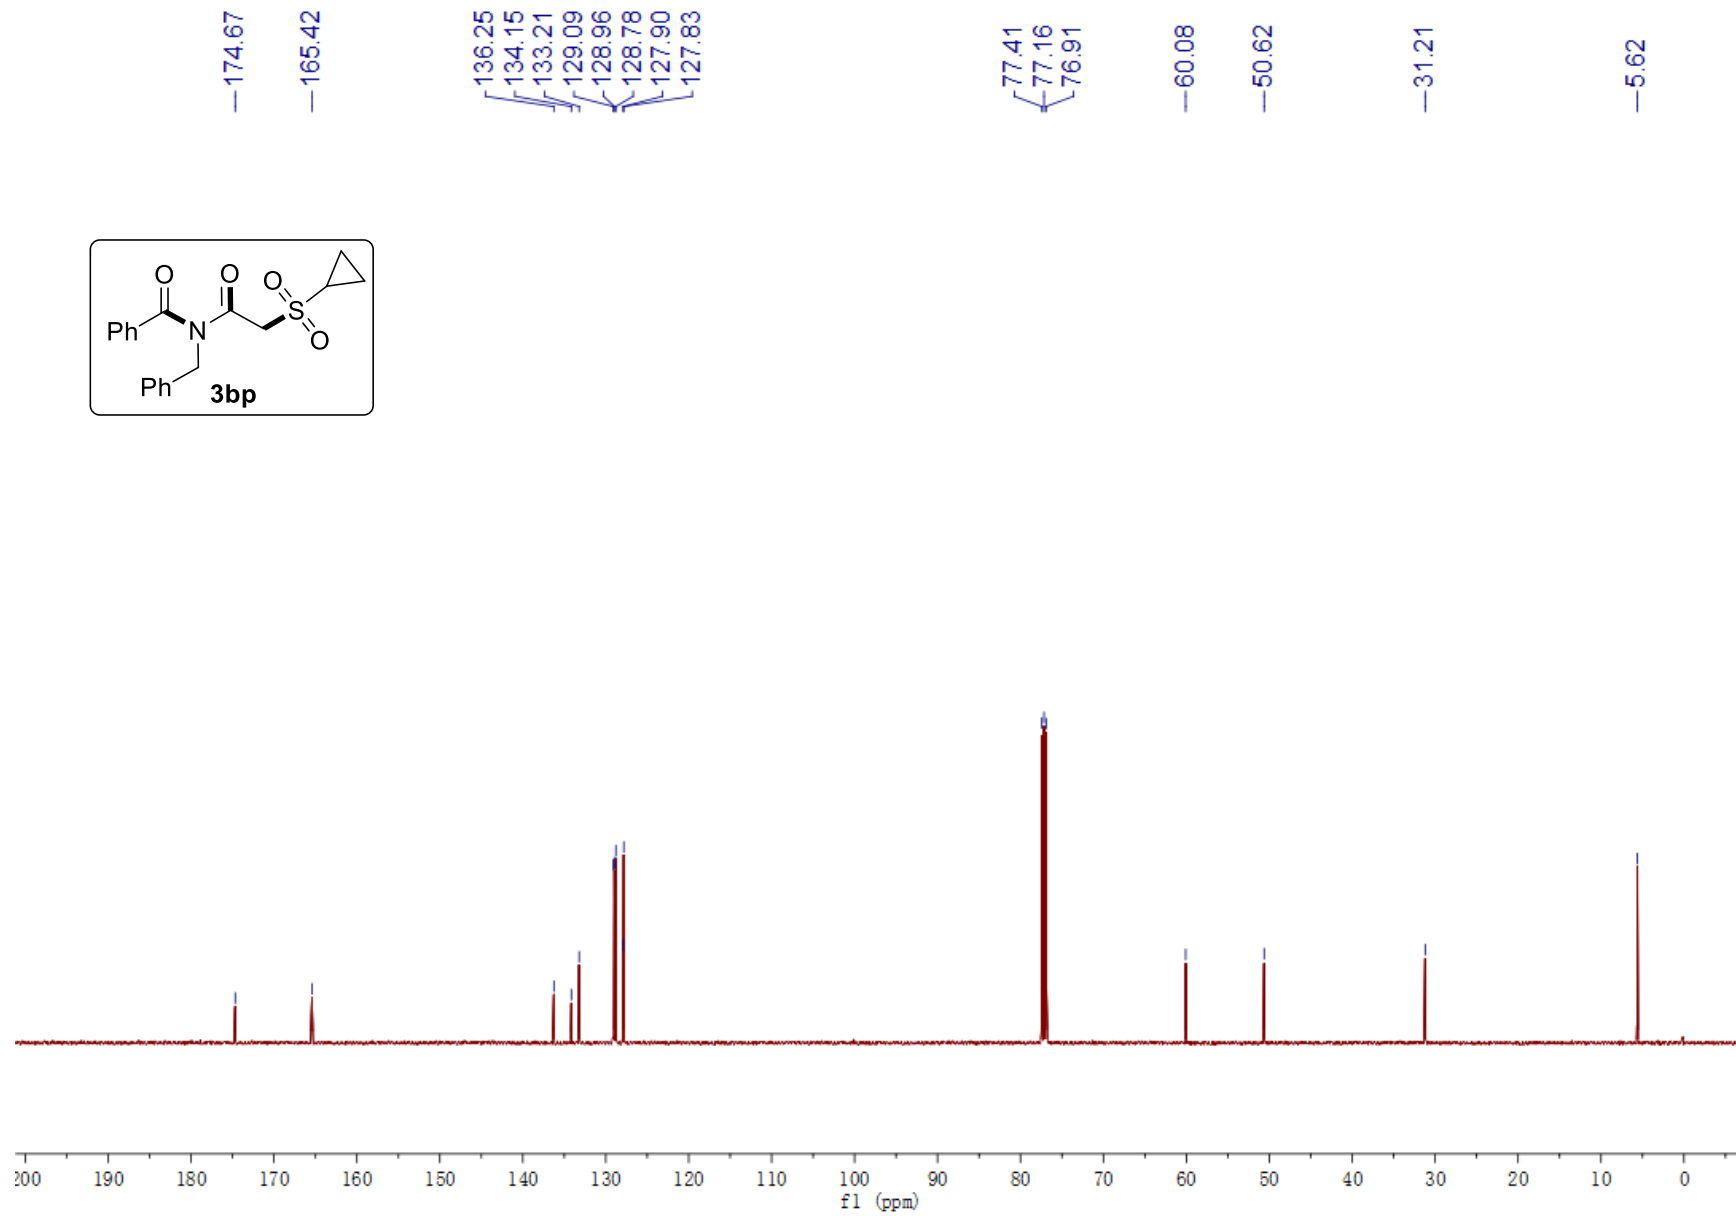

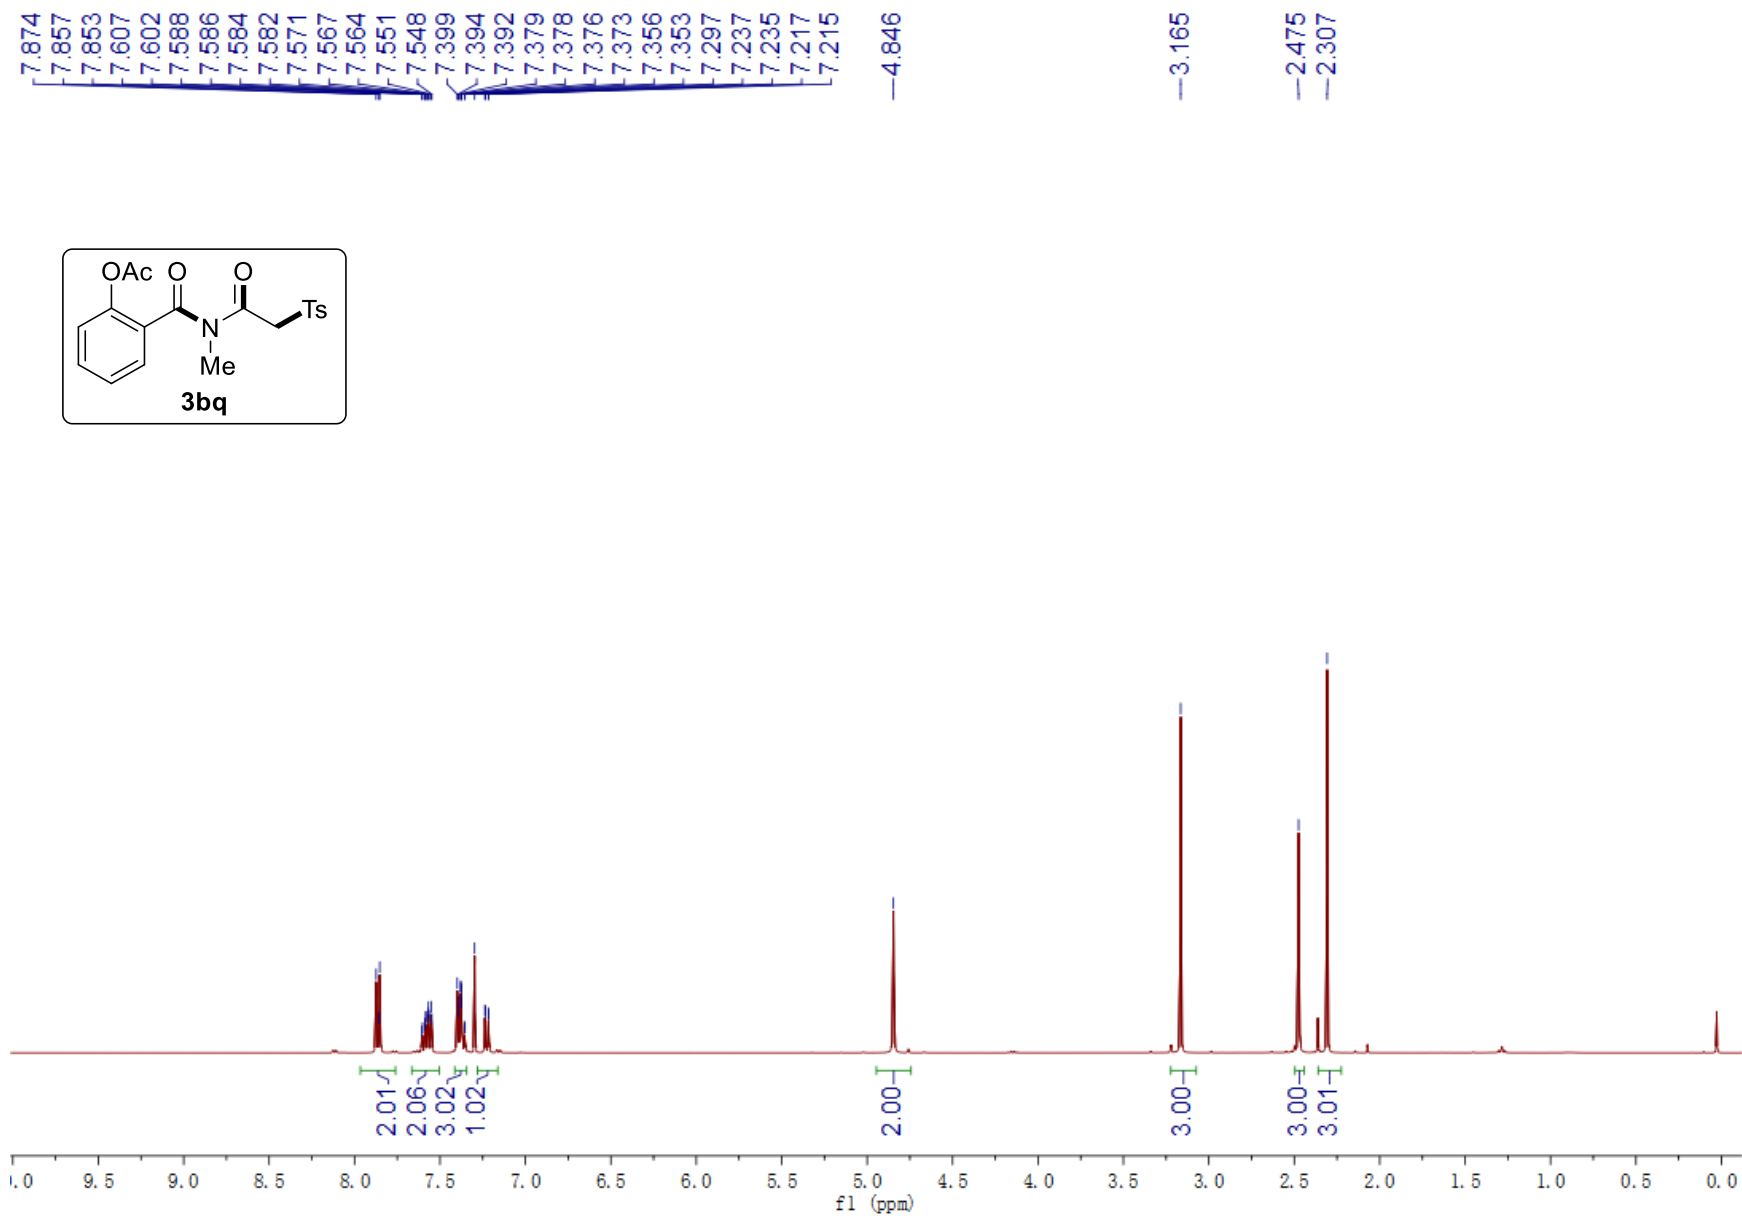

S199

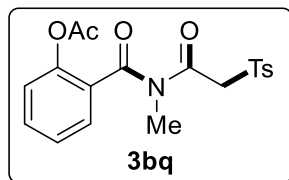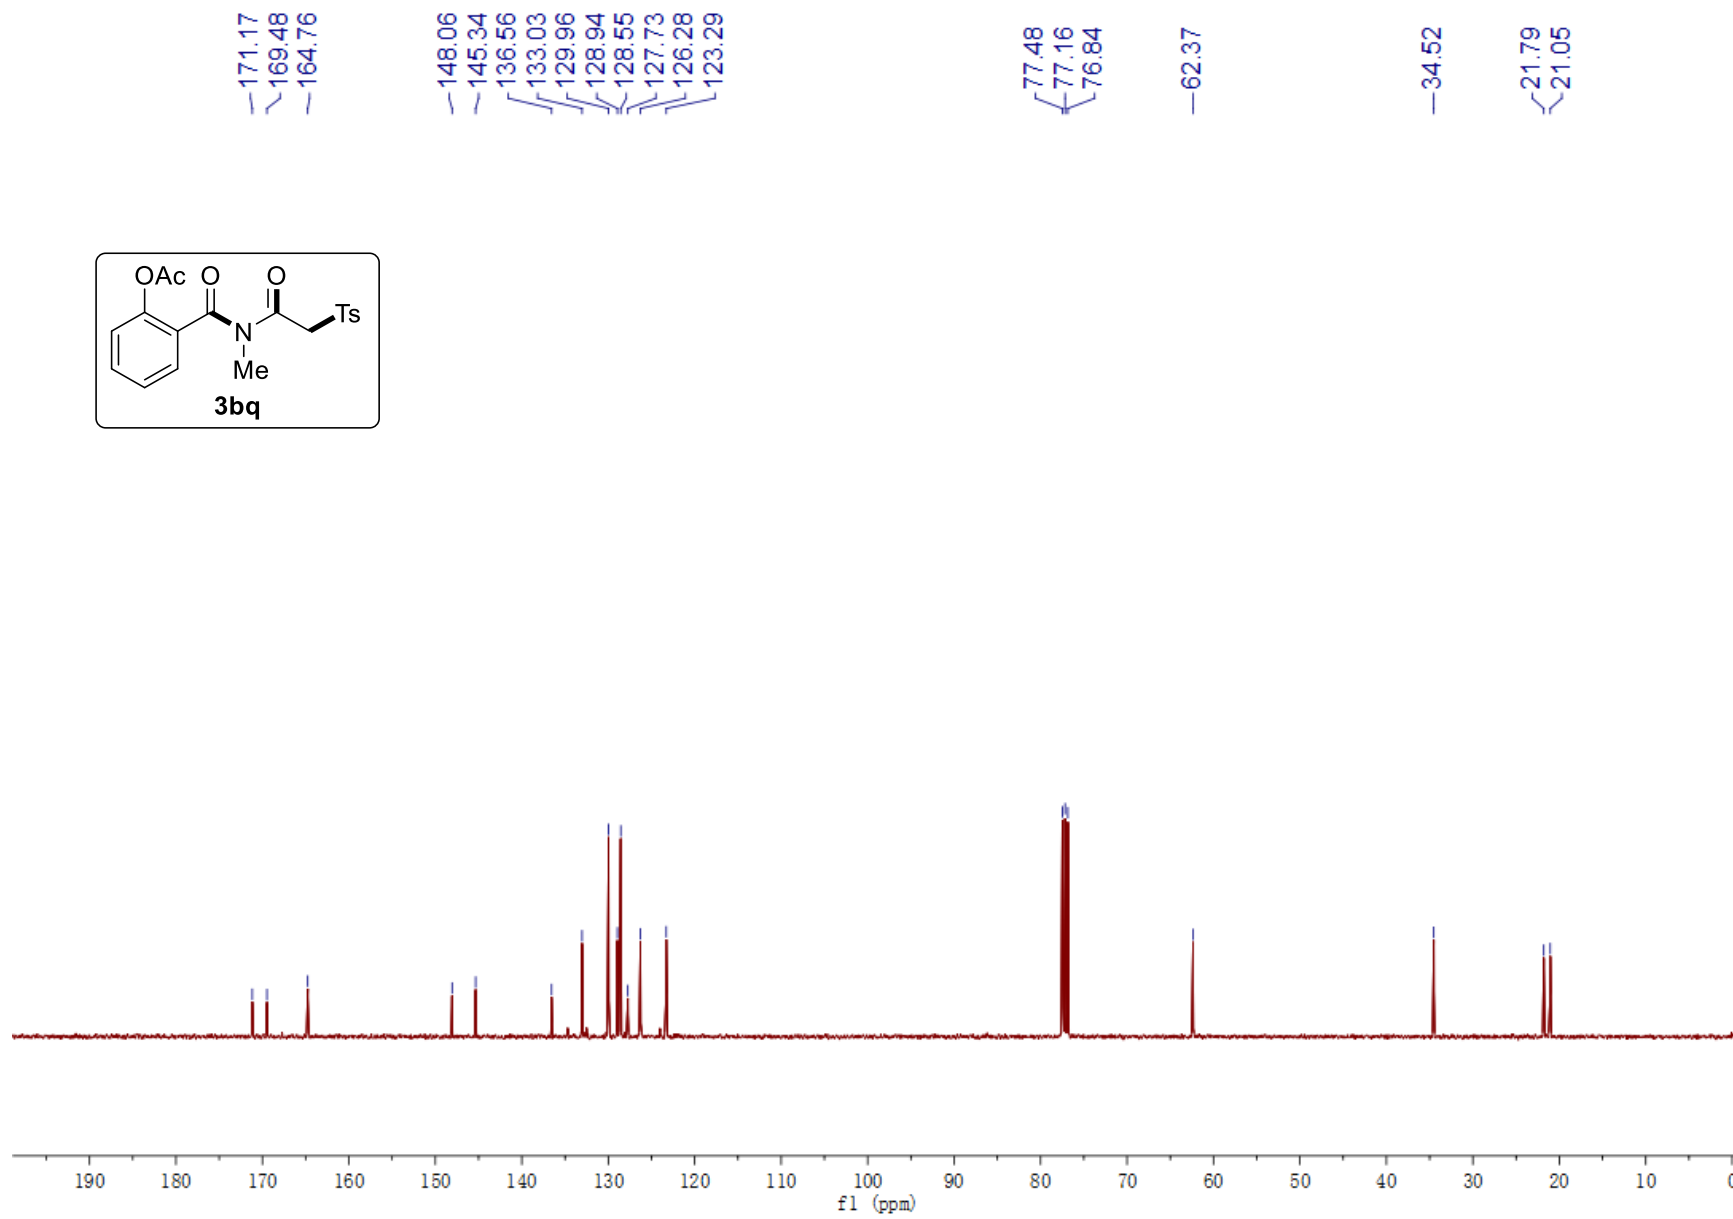

S200



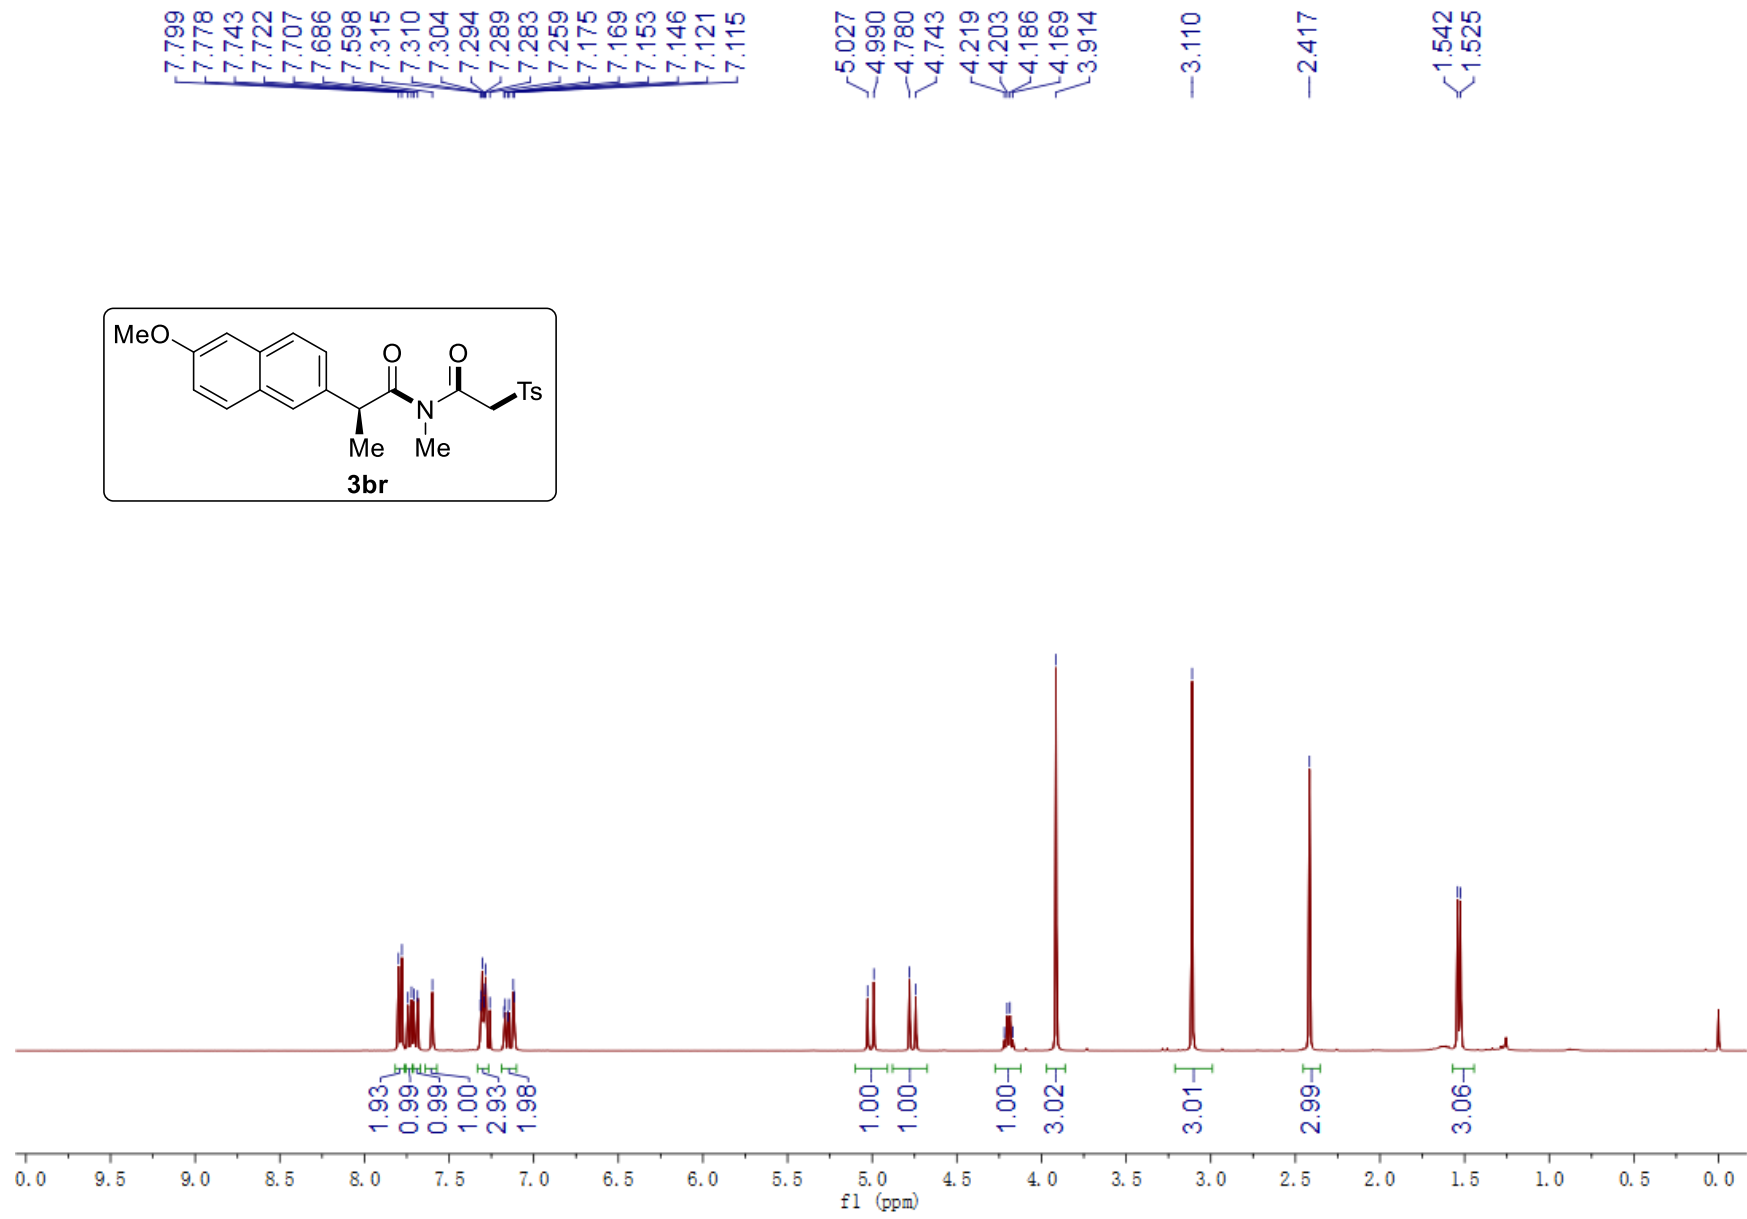

S201

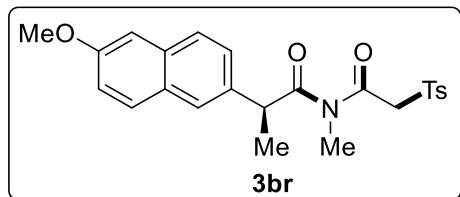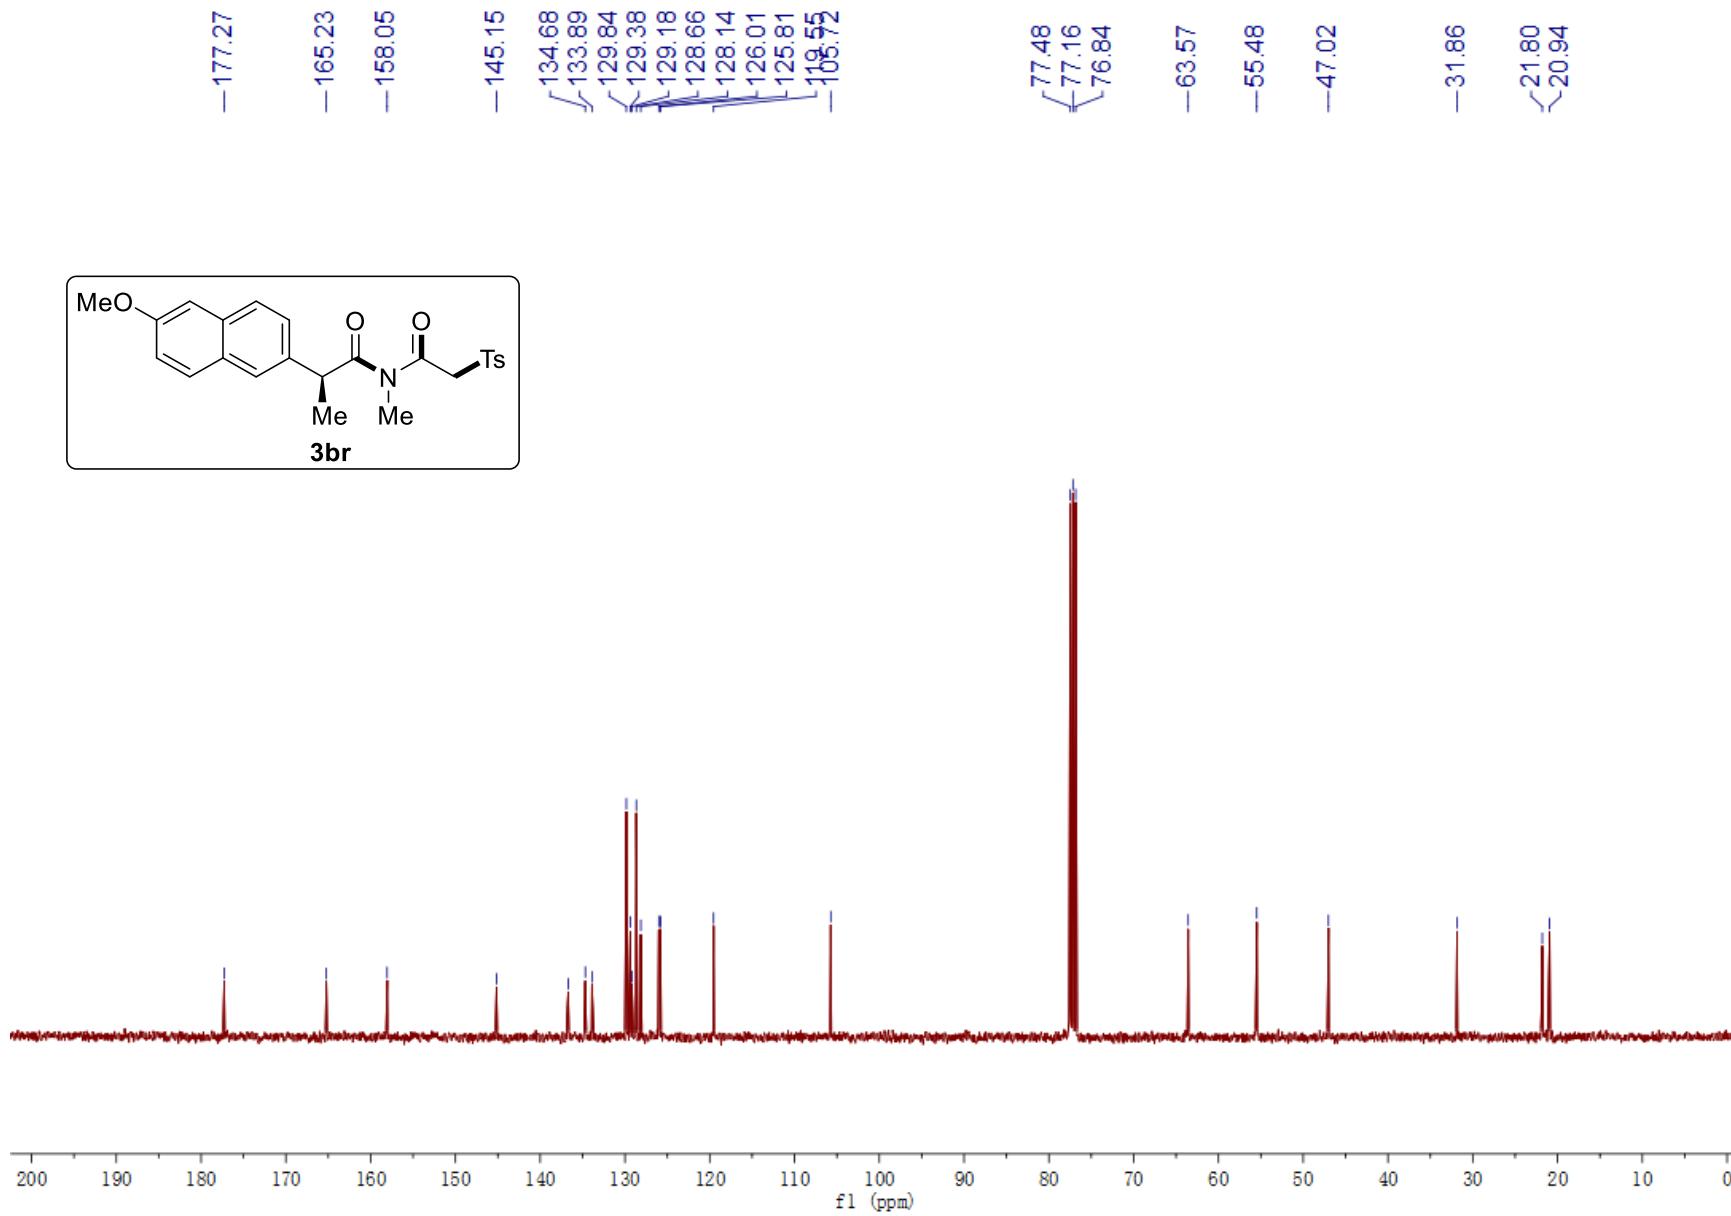

S202

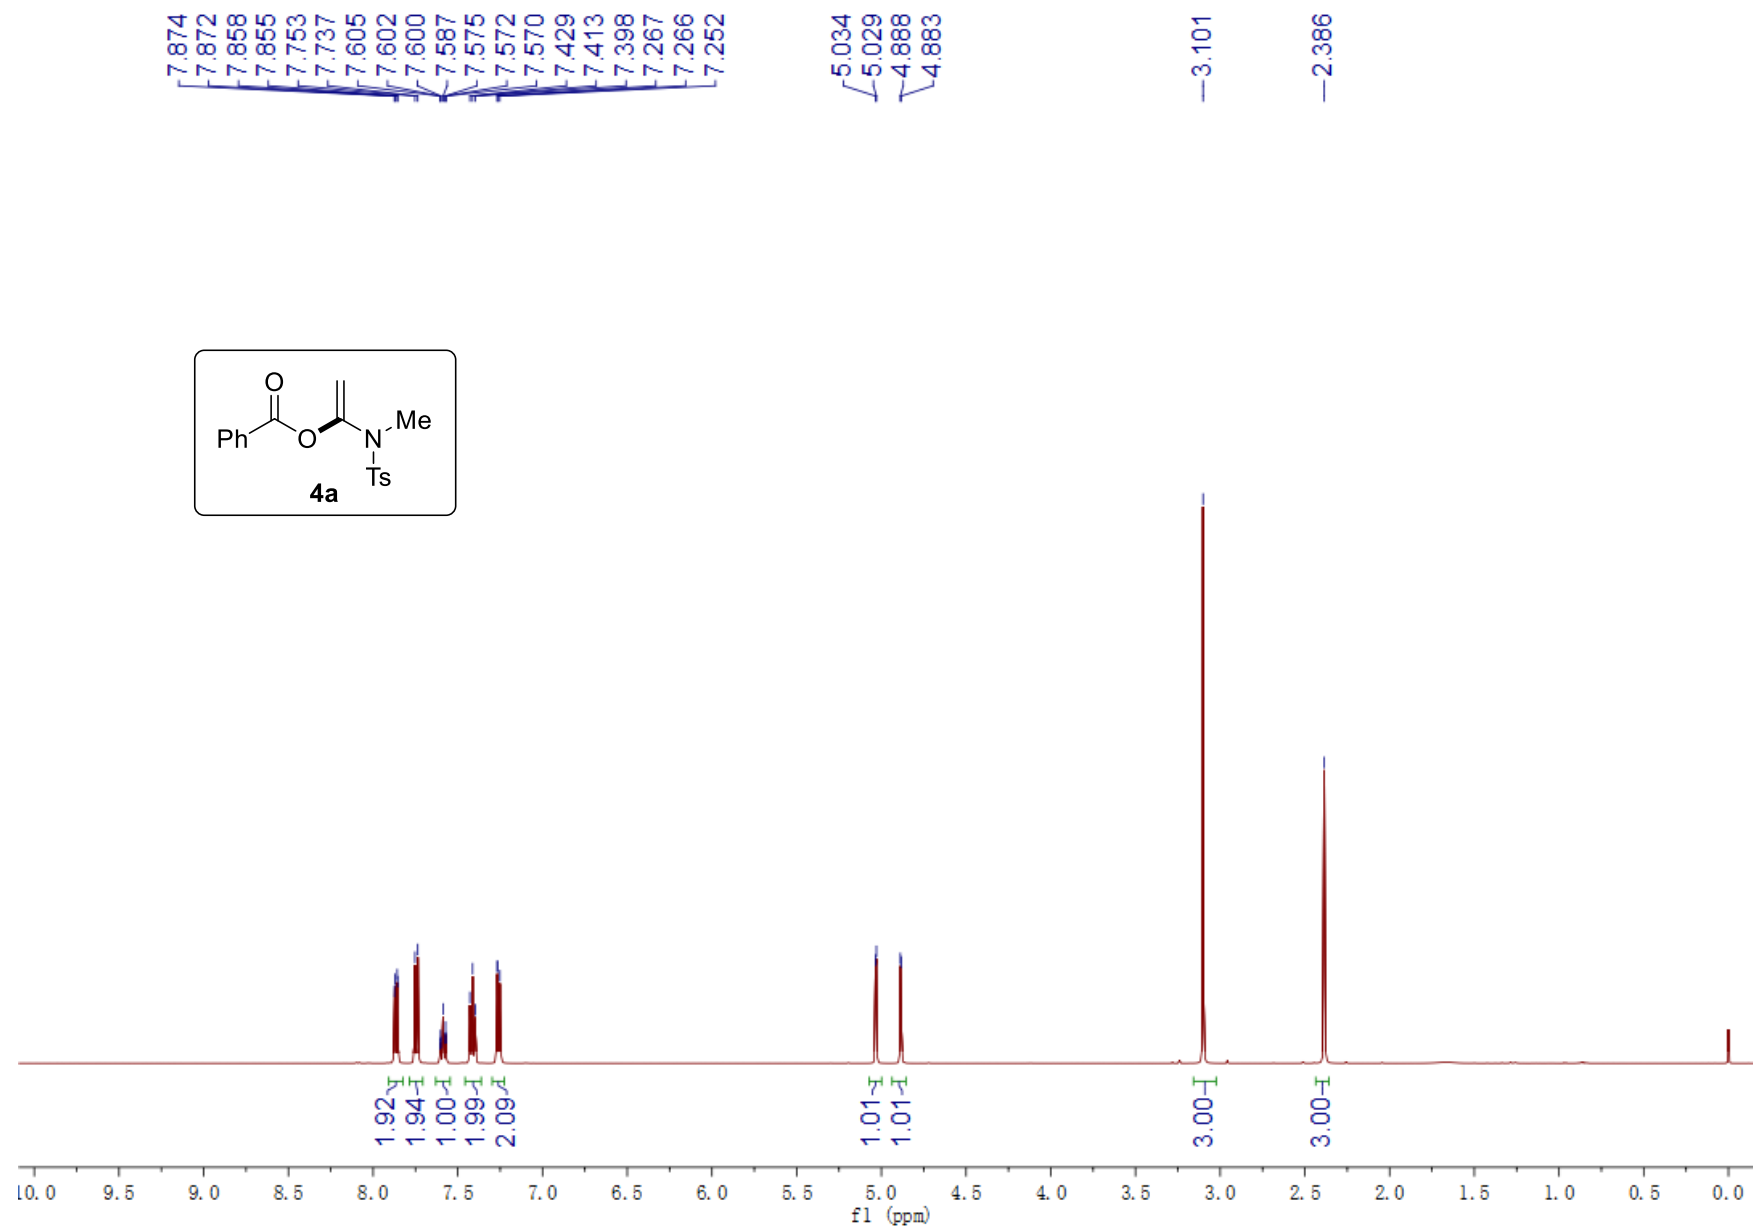

S203

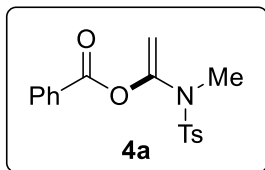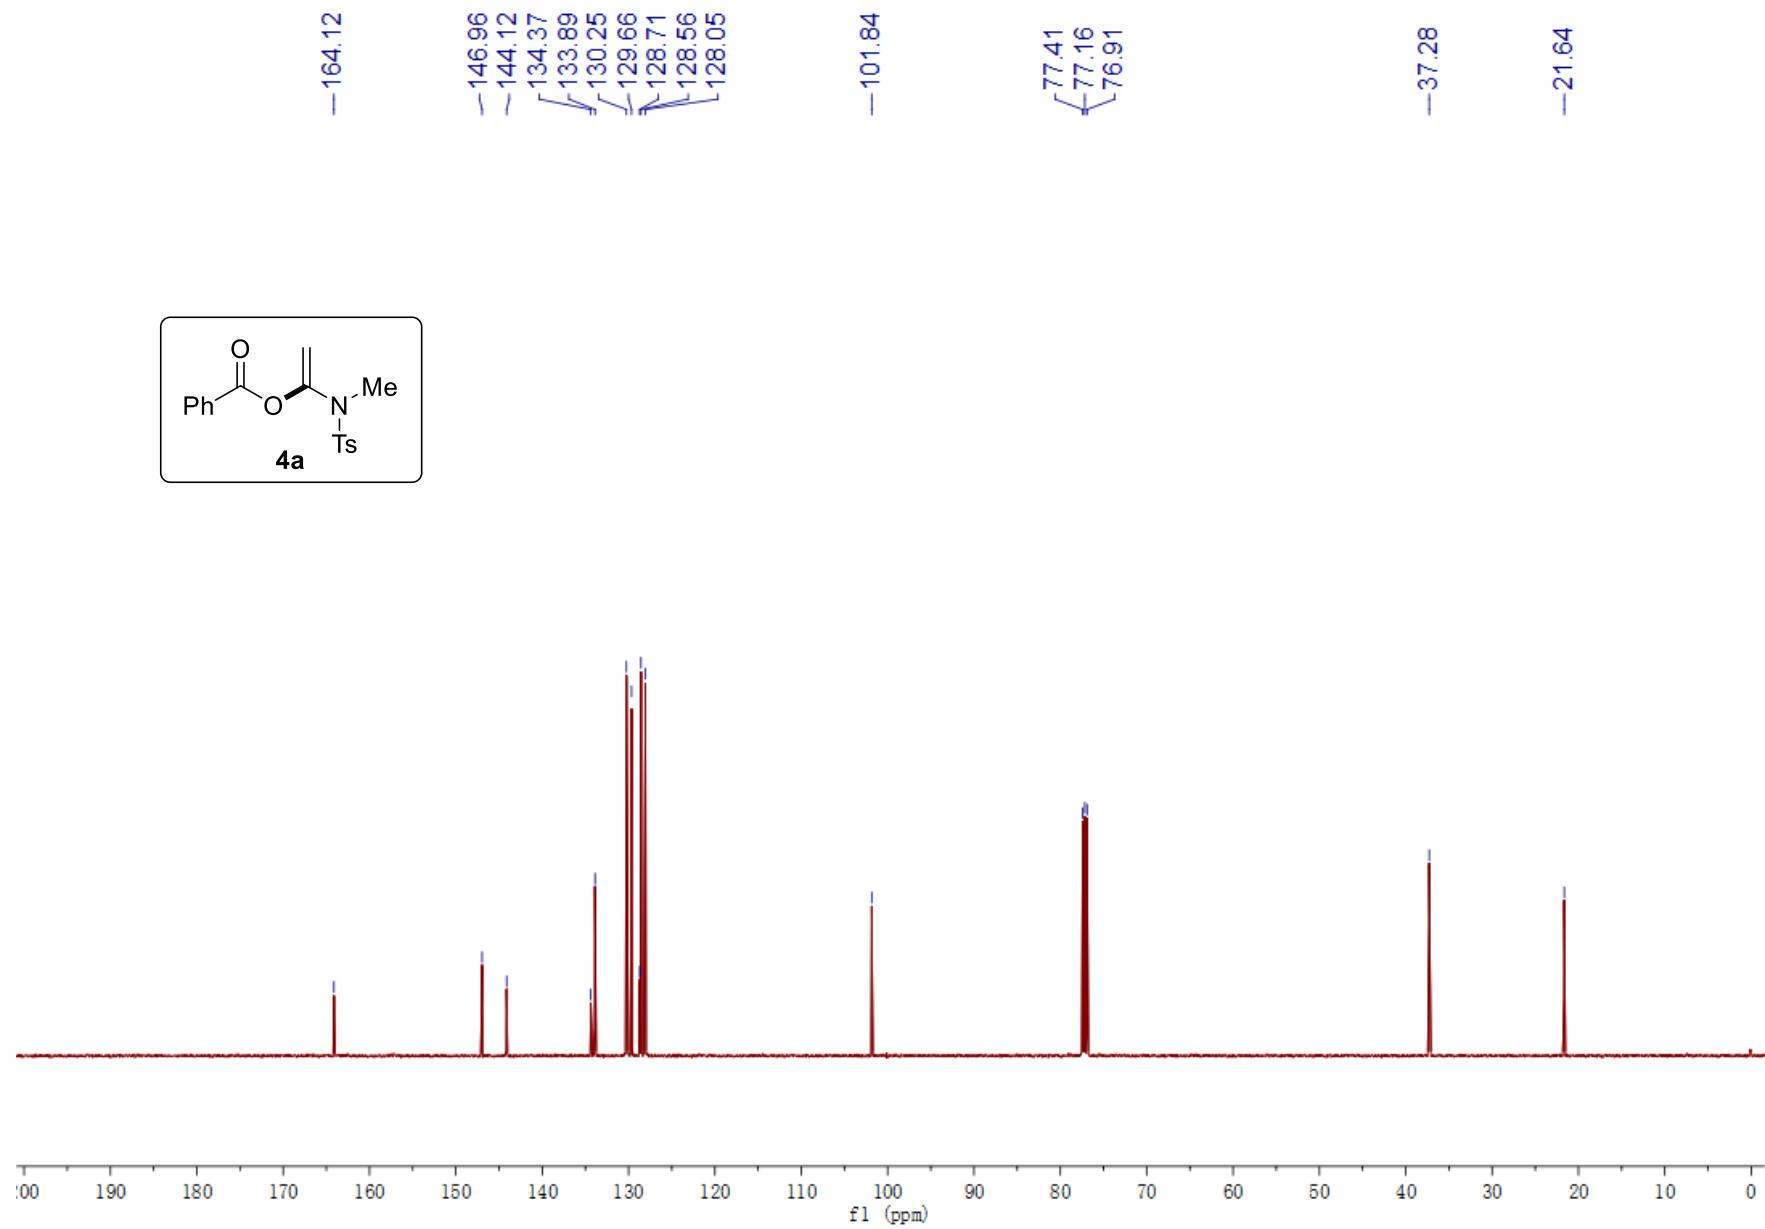

S204

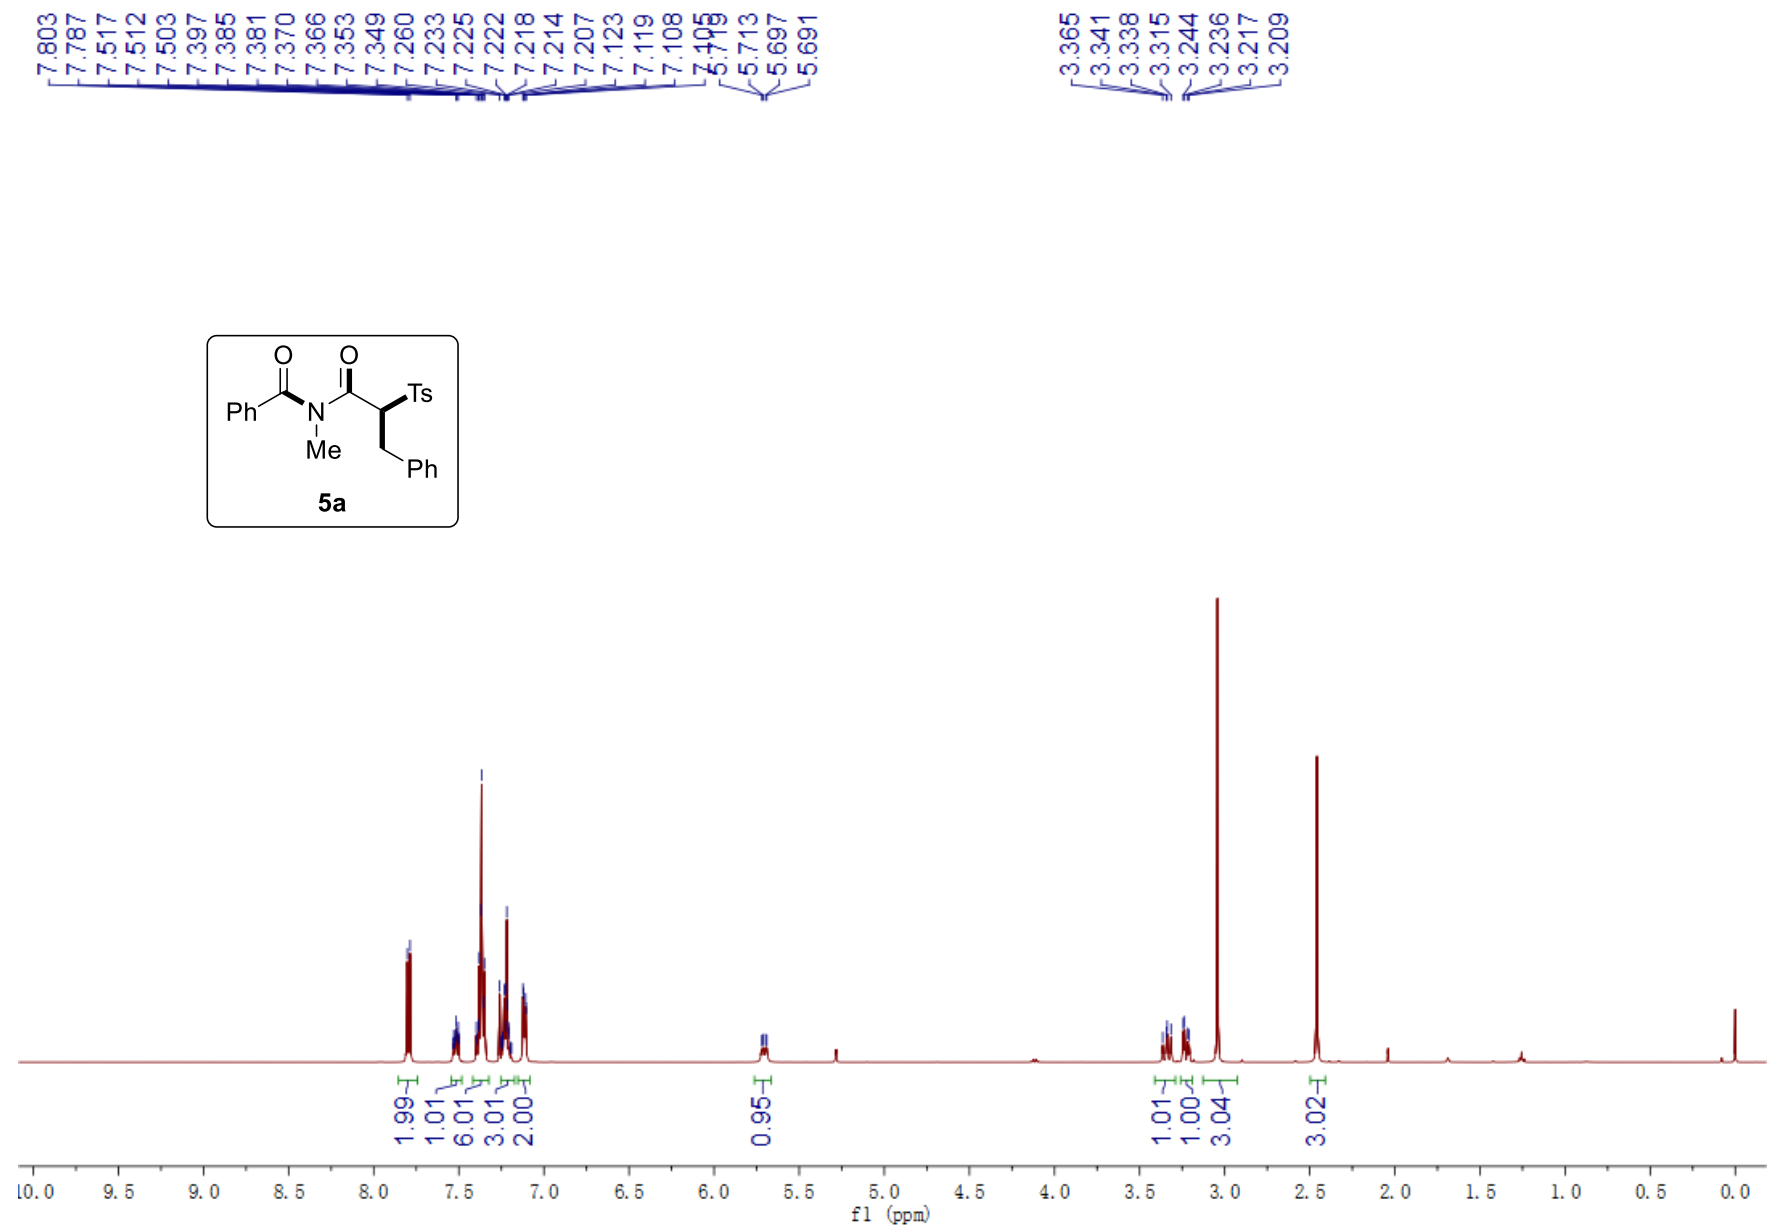

S205

—174.29

—167.57

—145.47

135.80

134.27

134.04

132.70

129.83

129.57

129.19

128.79

128.73

127.13

77.41

77.16

76.91

—69.16

35.73

34.13

—21.82

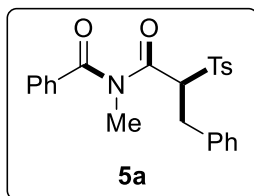

**5a**

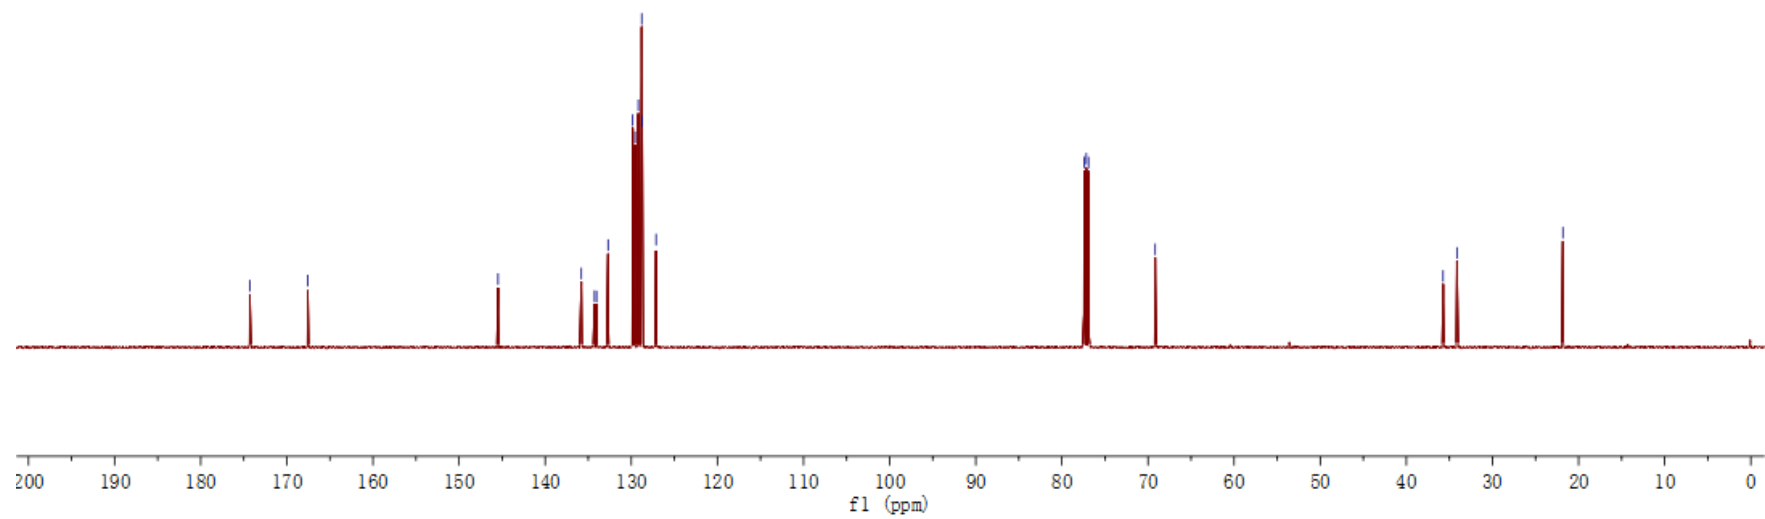

S206

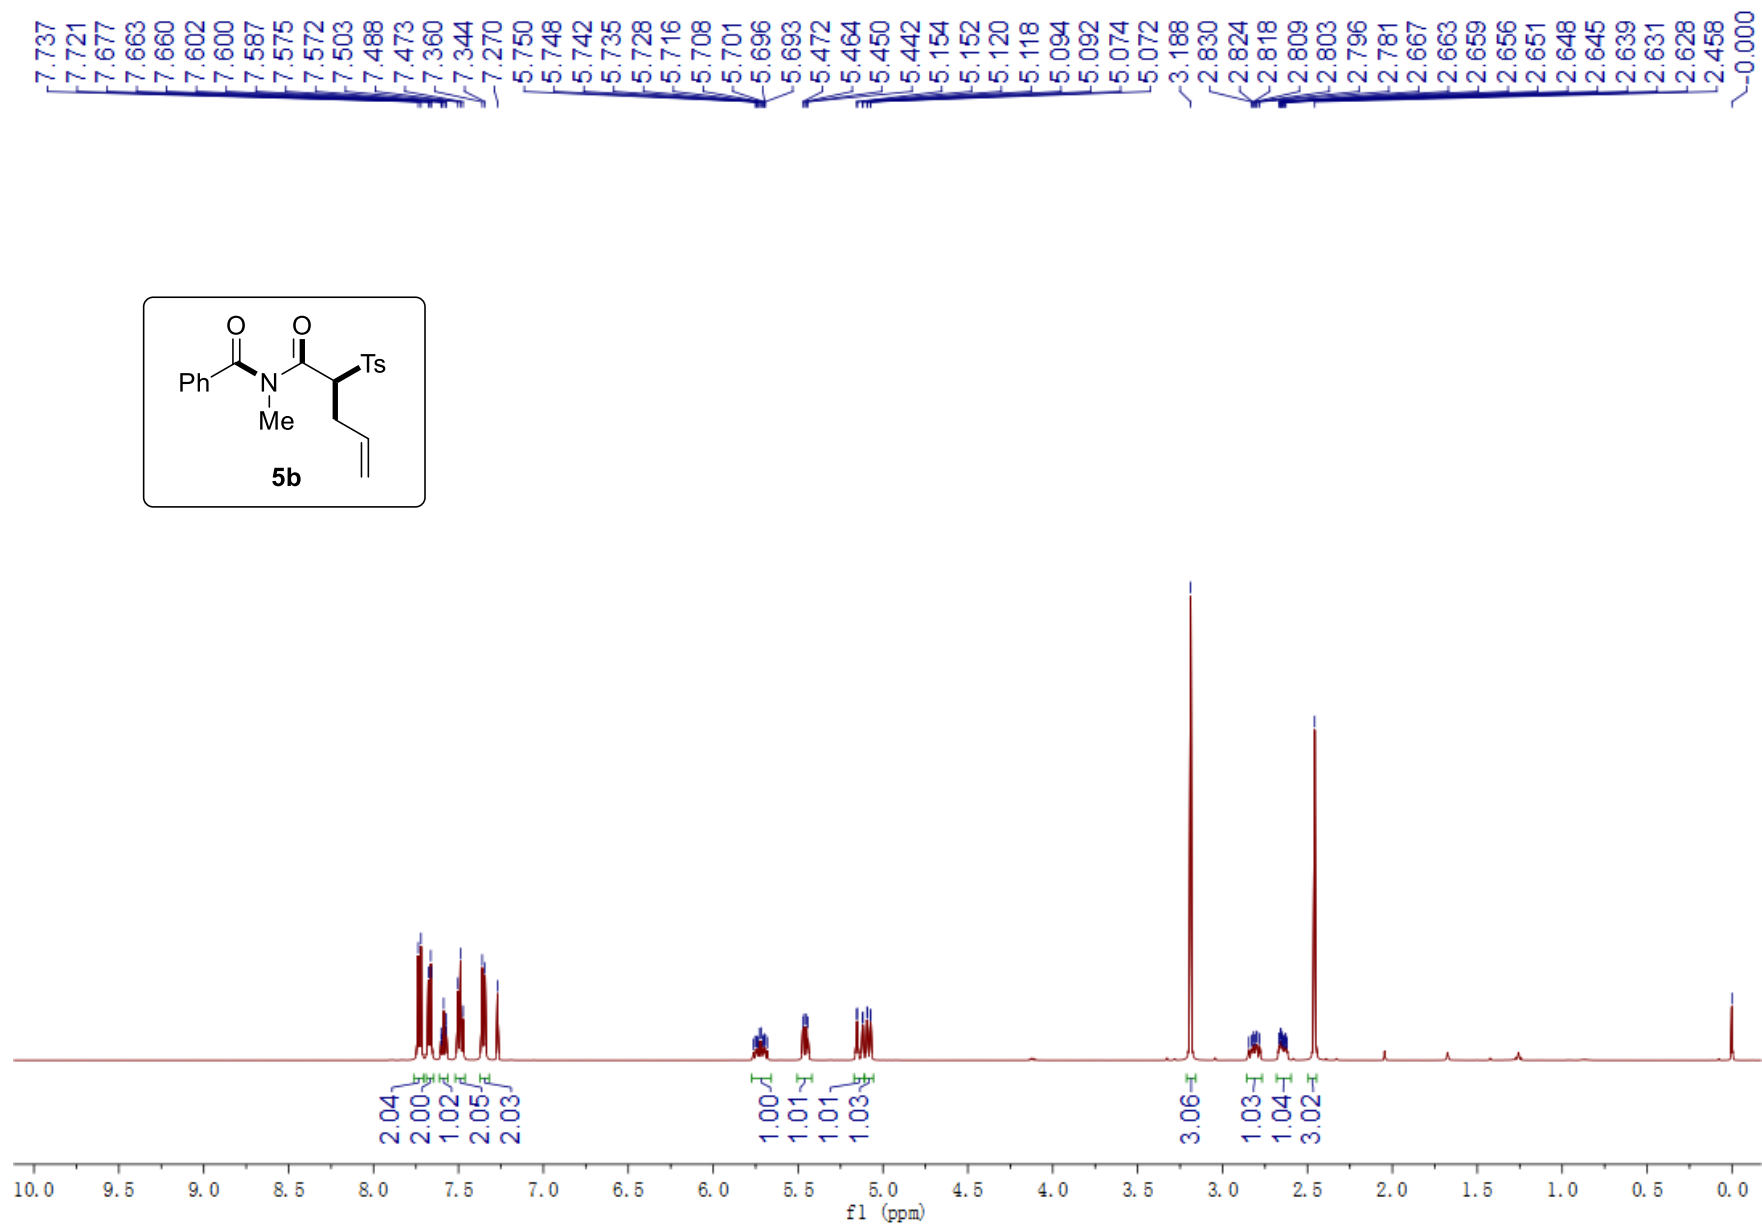

S207

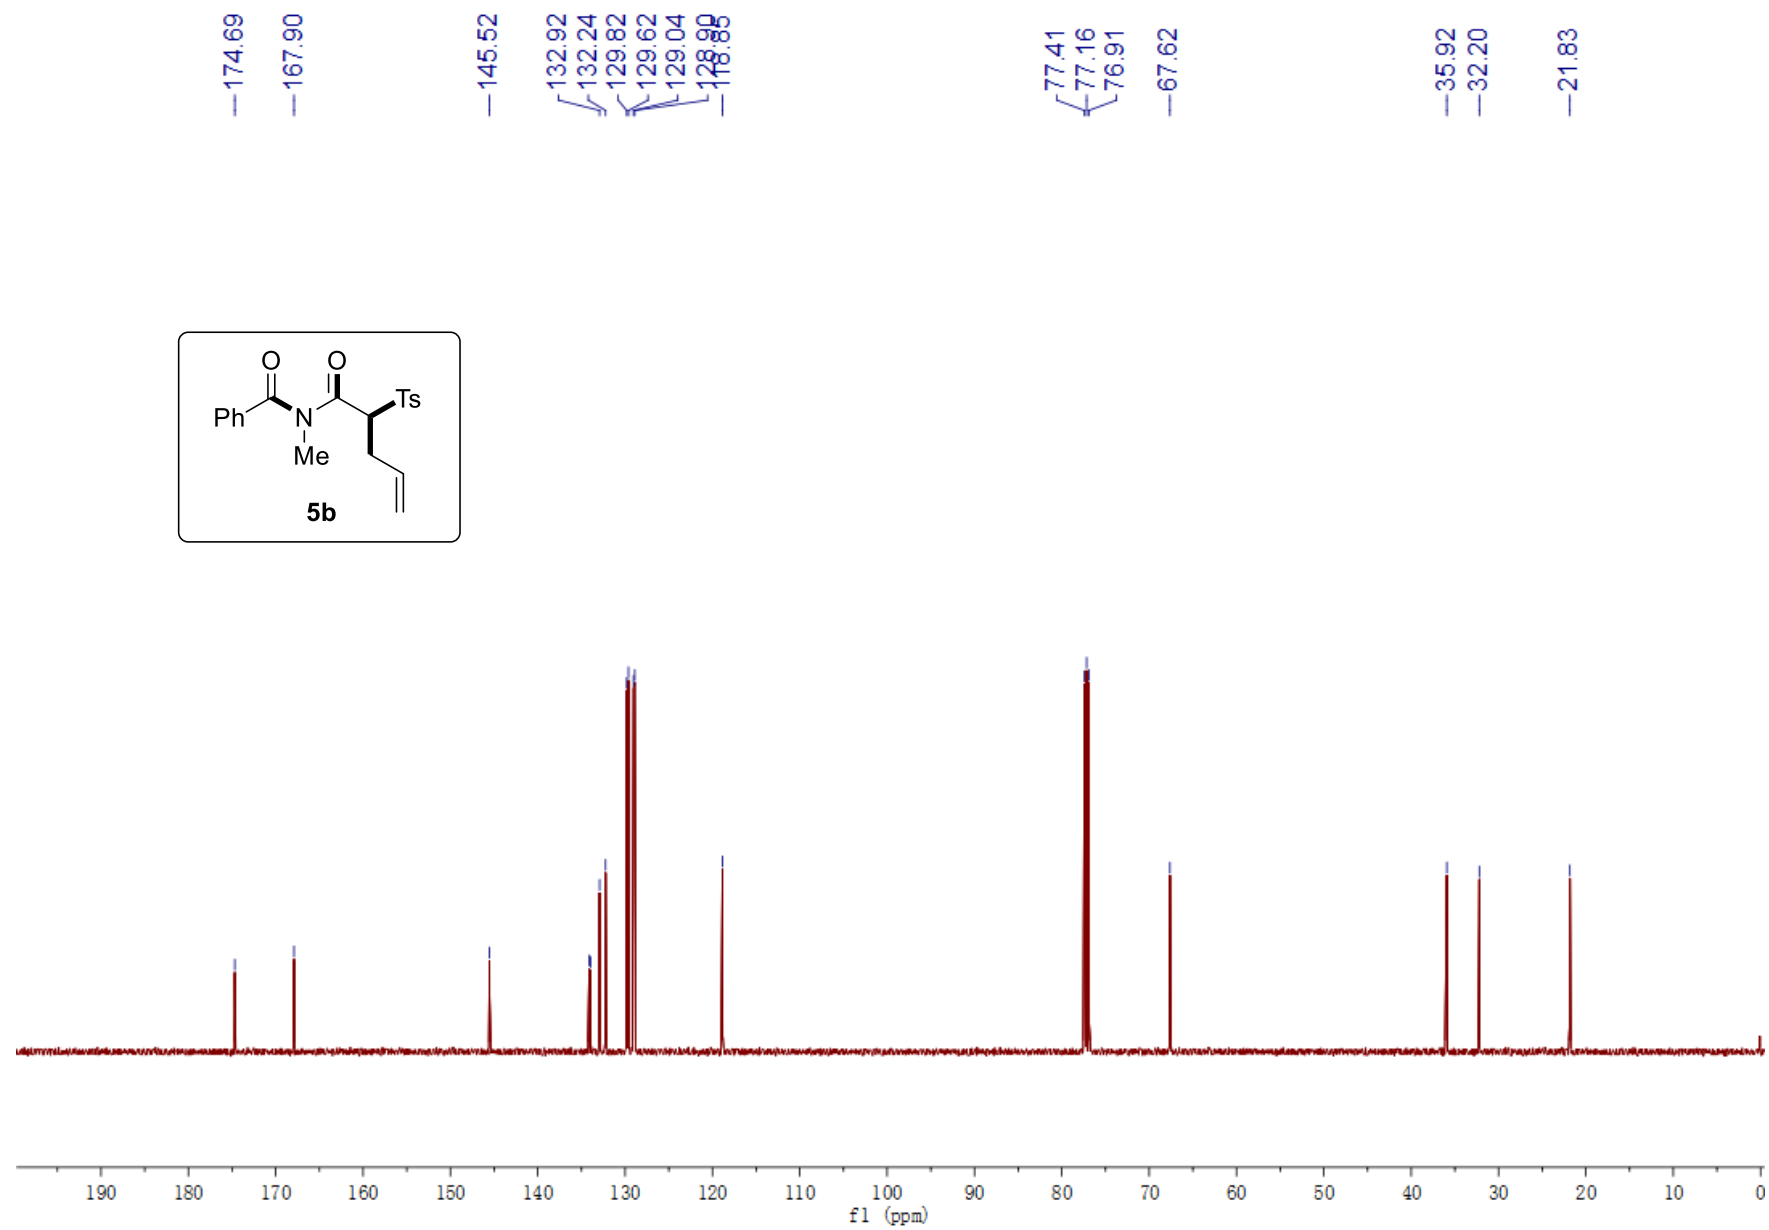

S208



7.745  
7.729  
7.717  
7.703  
7.700  
7.608  
7.606  
7.593  
7.580  
7.578  
7.512  
7.496  
7.481  
7.359  
7.343

5.652  
5.644  
5.632  
5.623

3.246  
3.068  
3.053  
3.048  
3.041  
3.035  
3.020  
3.015  
2.734  
2.729  
2.726  
2.720  
2.701  
2.696  
2.693  
2.687  
2.459  
2.013  
2.008  
2.003

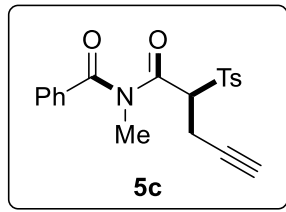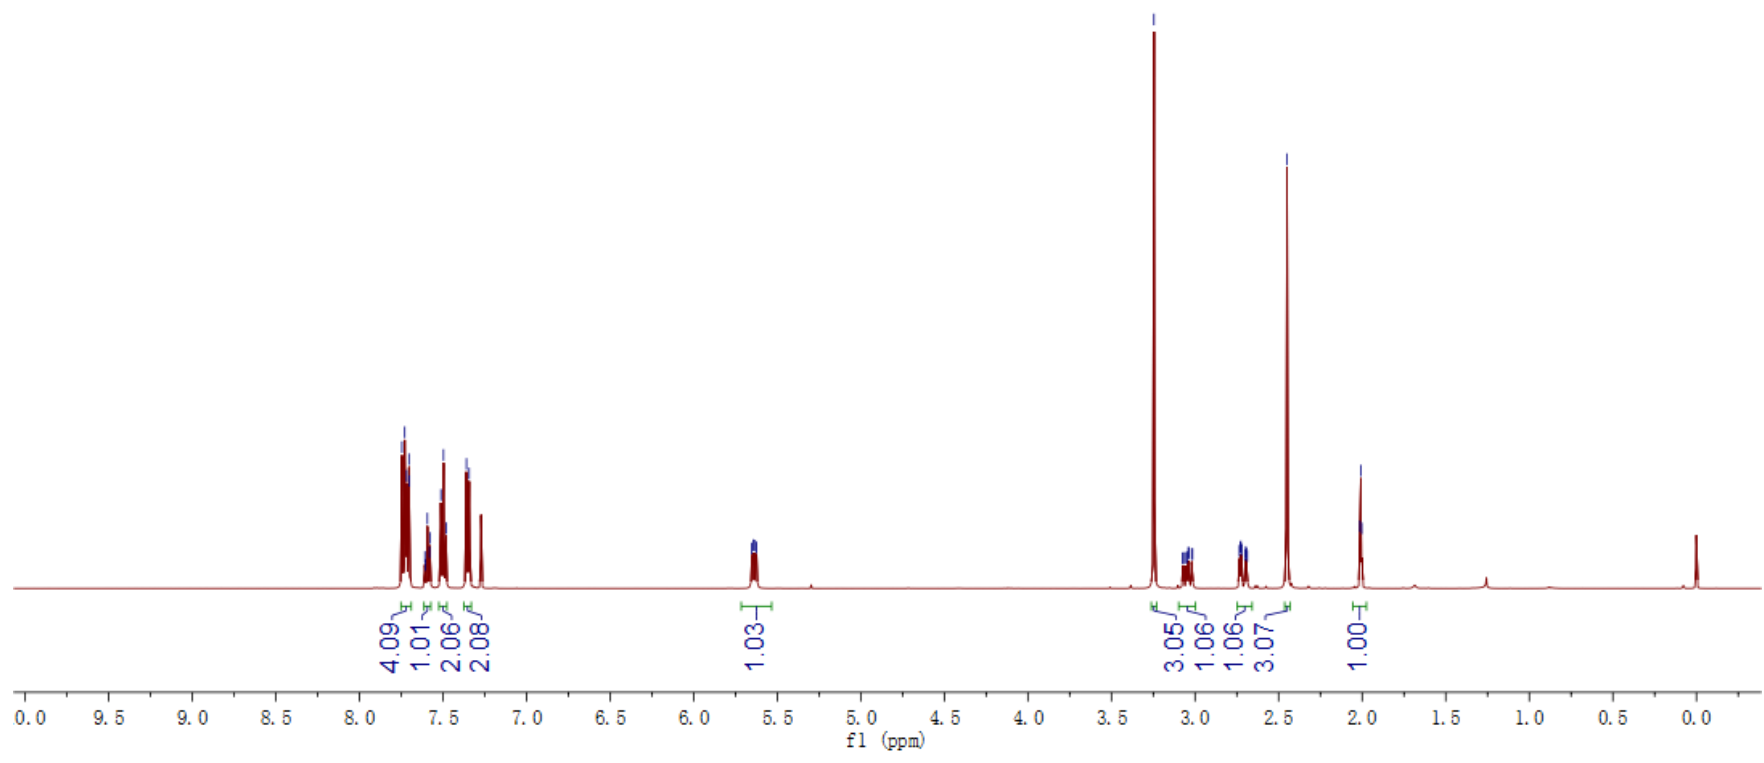

S209

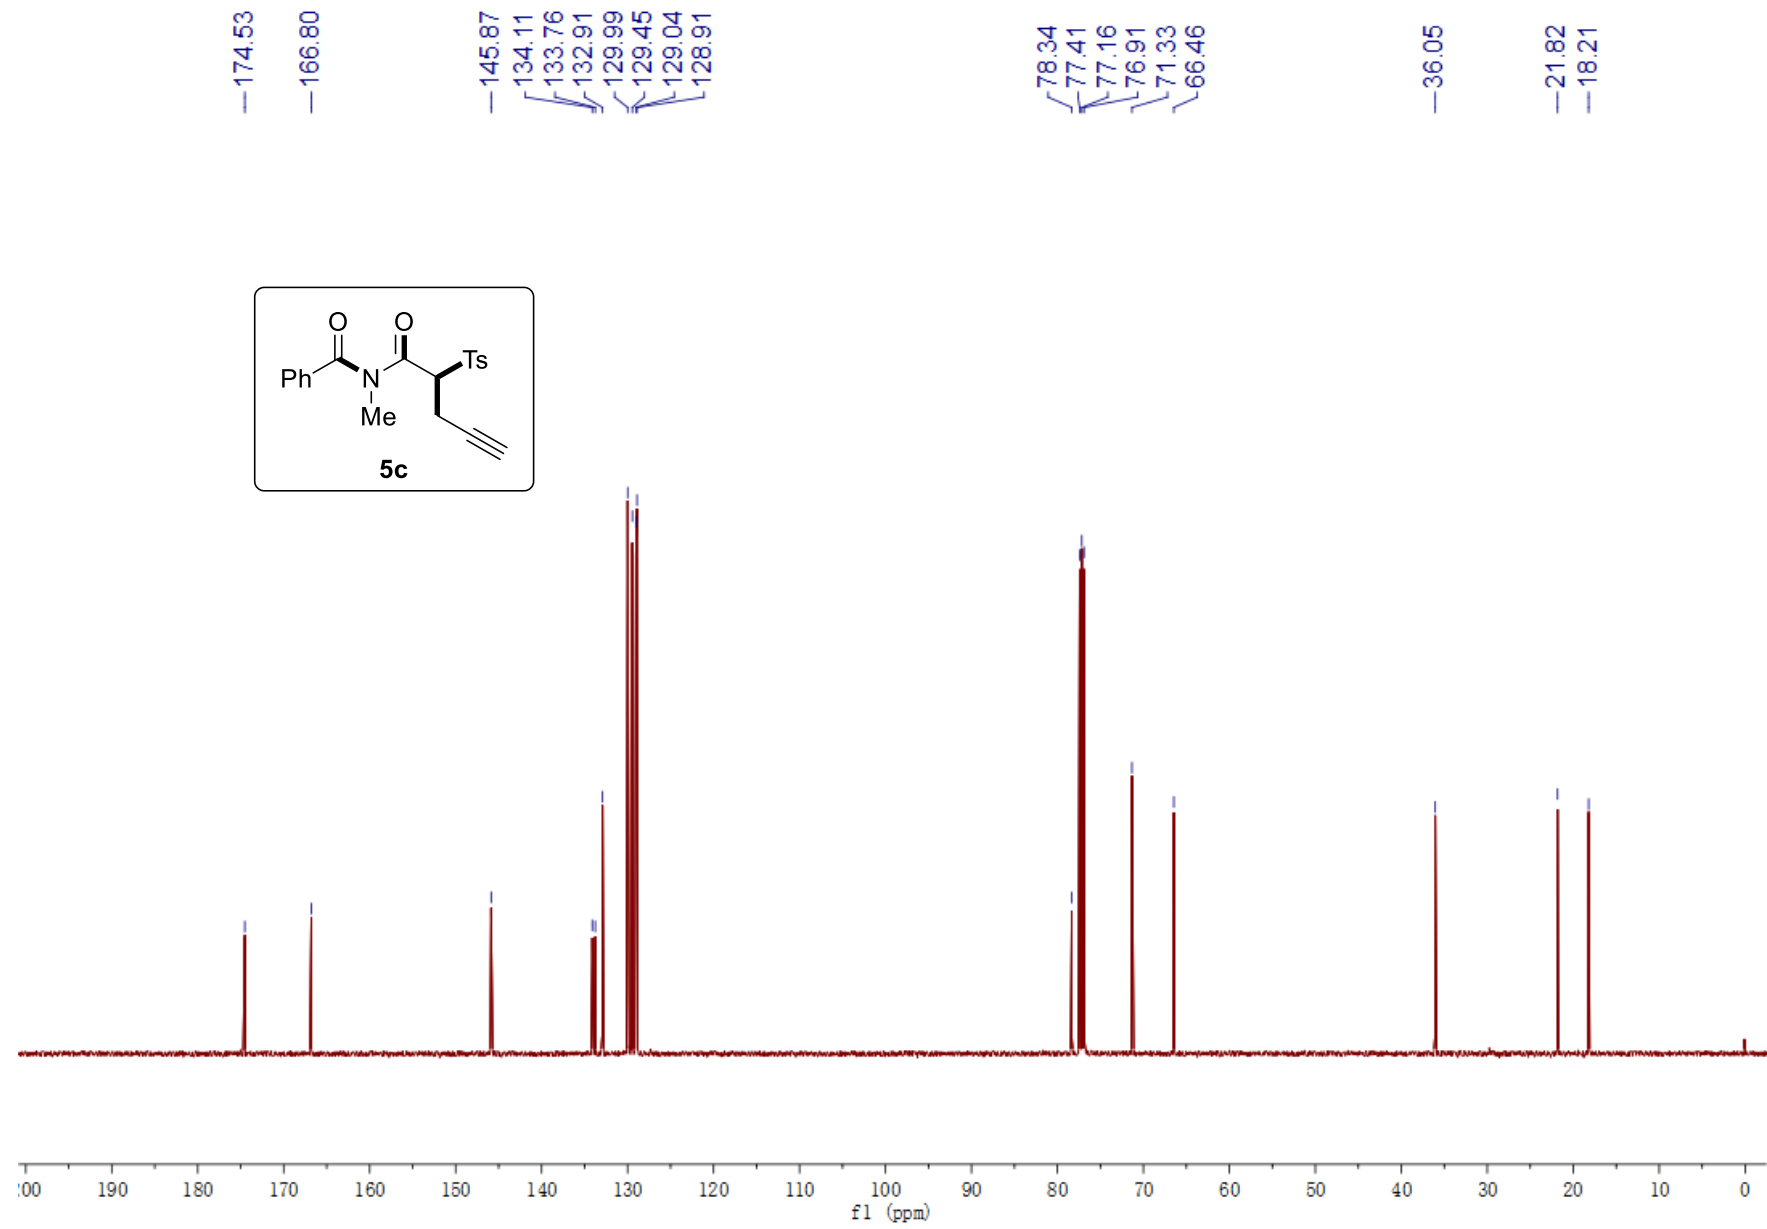

S210

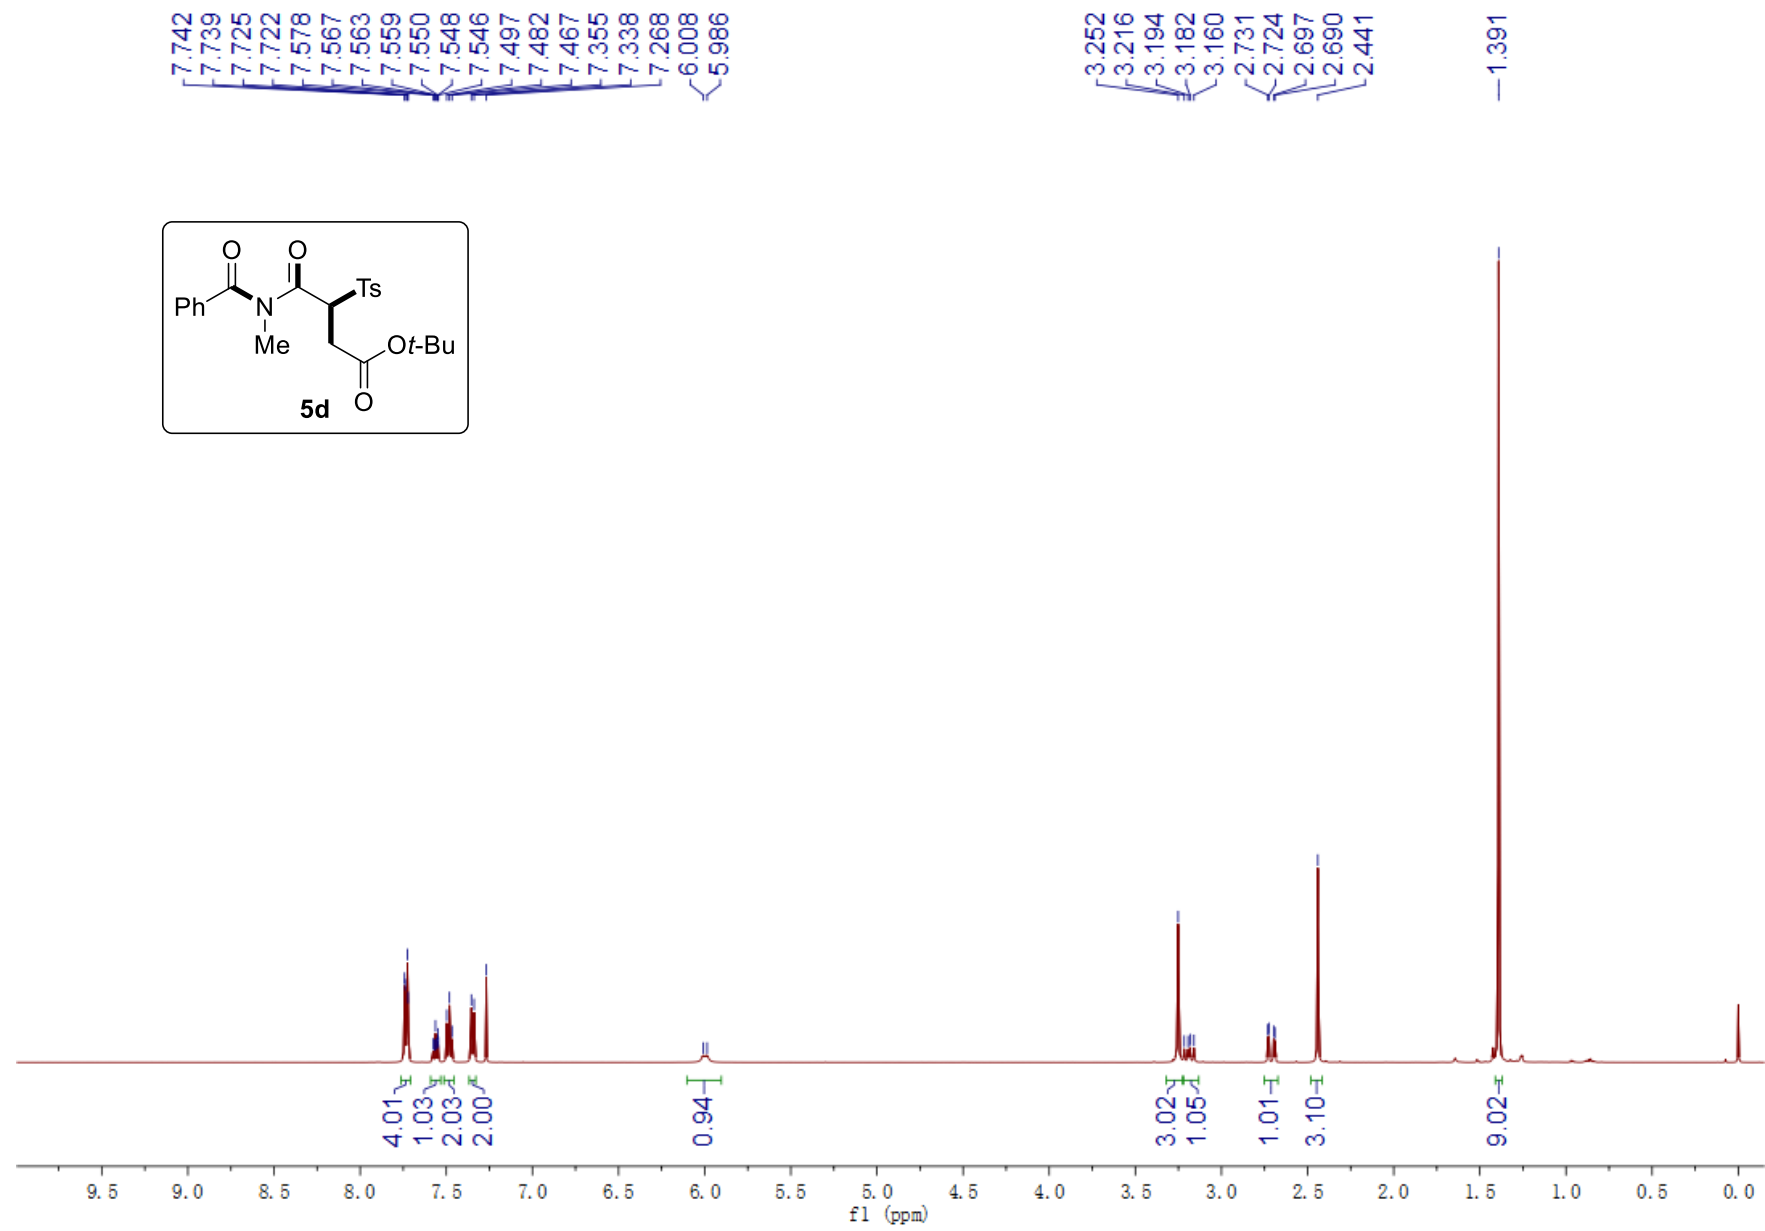

S211

174.56  
168.77  
167.11

145.73  
134.76  
134.00  
132.45  
130.01  
129.37  
128.88  
128.74

82.17  
77.41  
77.16  
76.91

63.89

36.18  
34.13  
28.04  
21.84

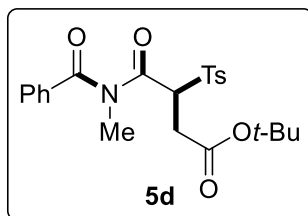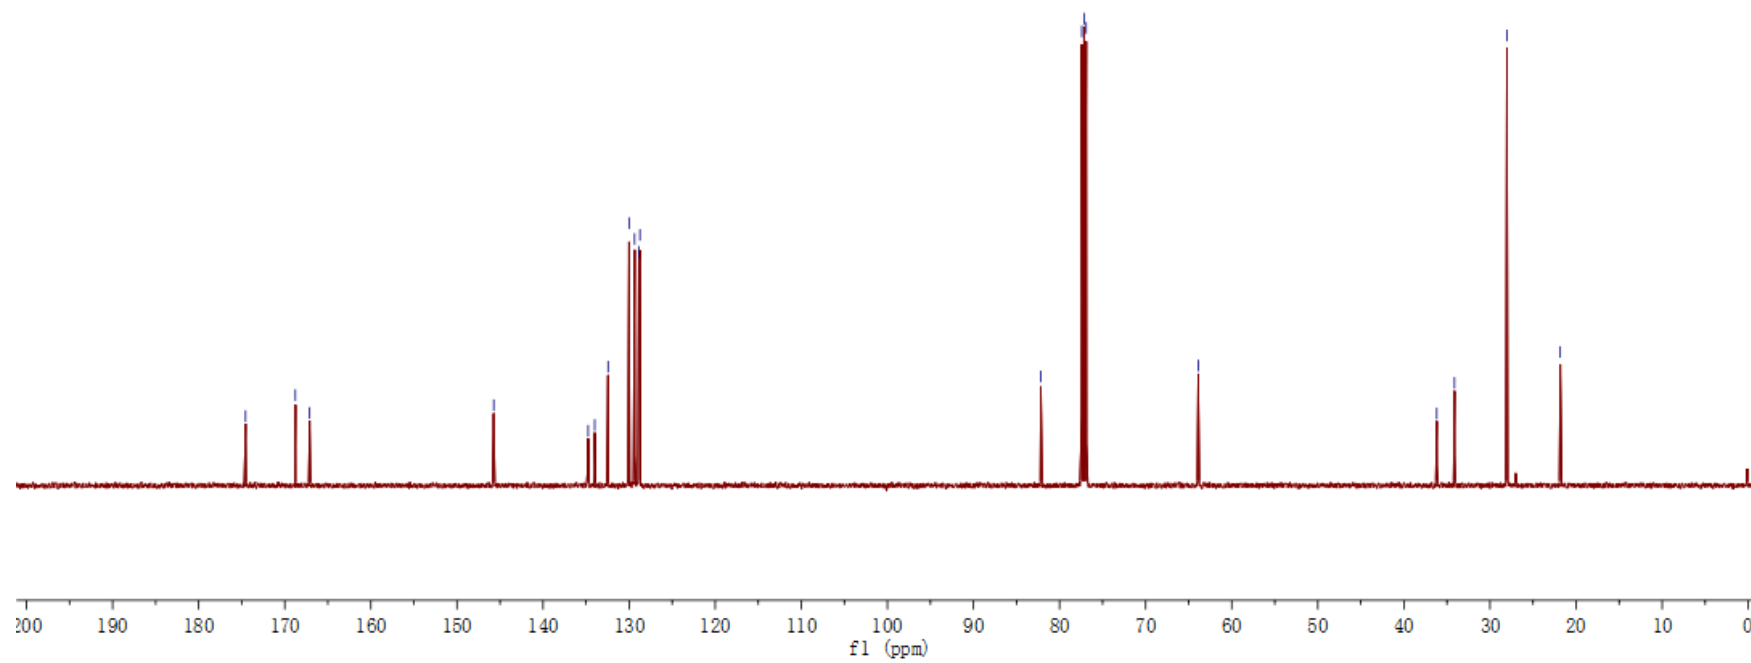

S212

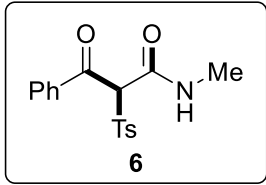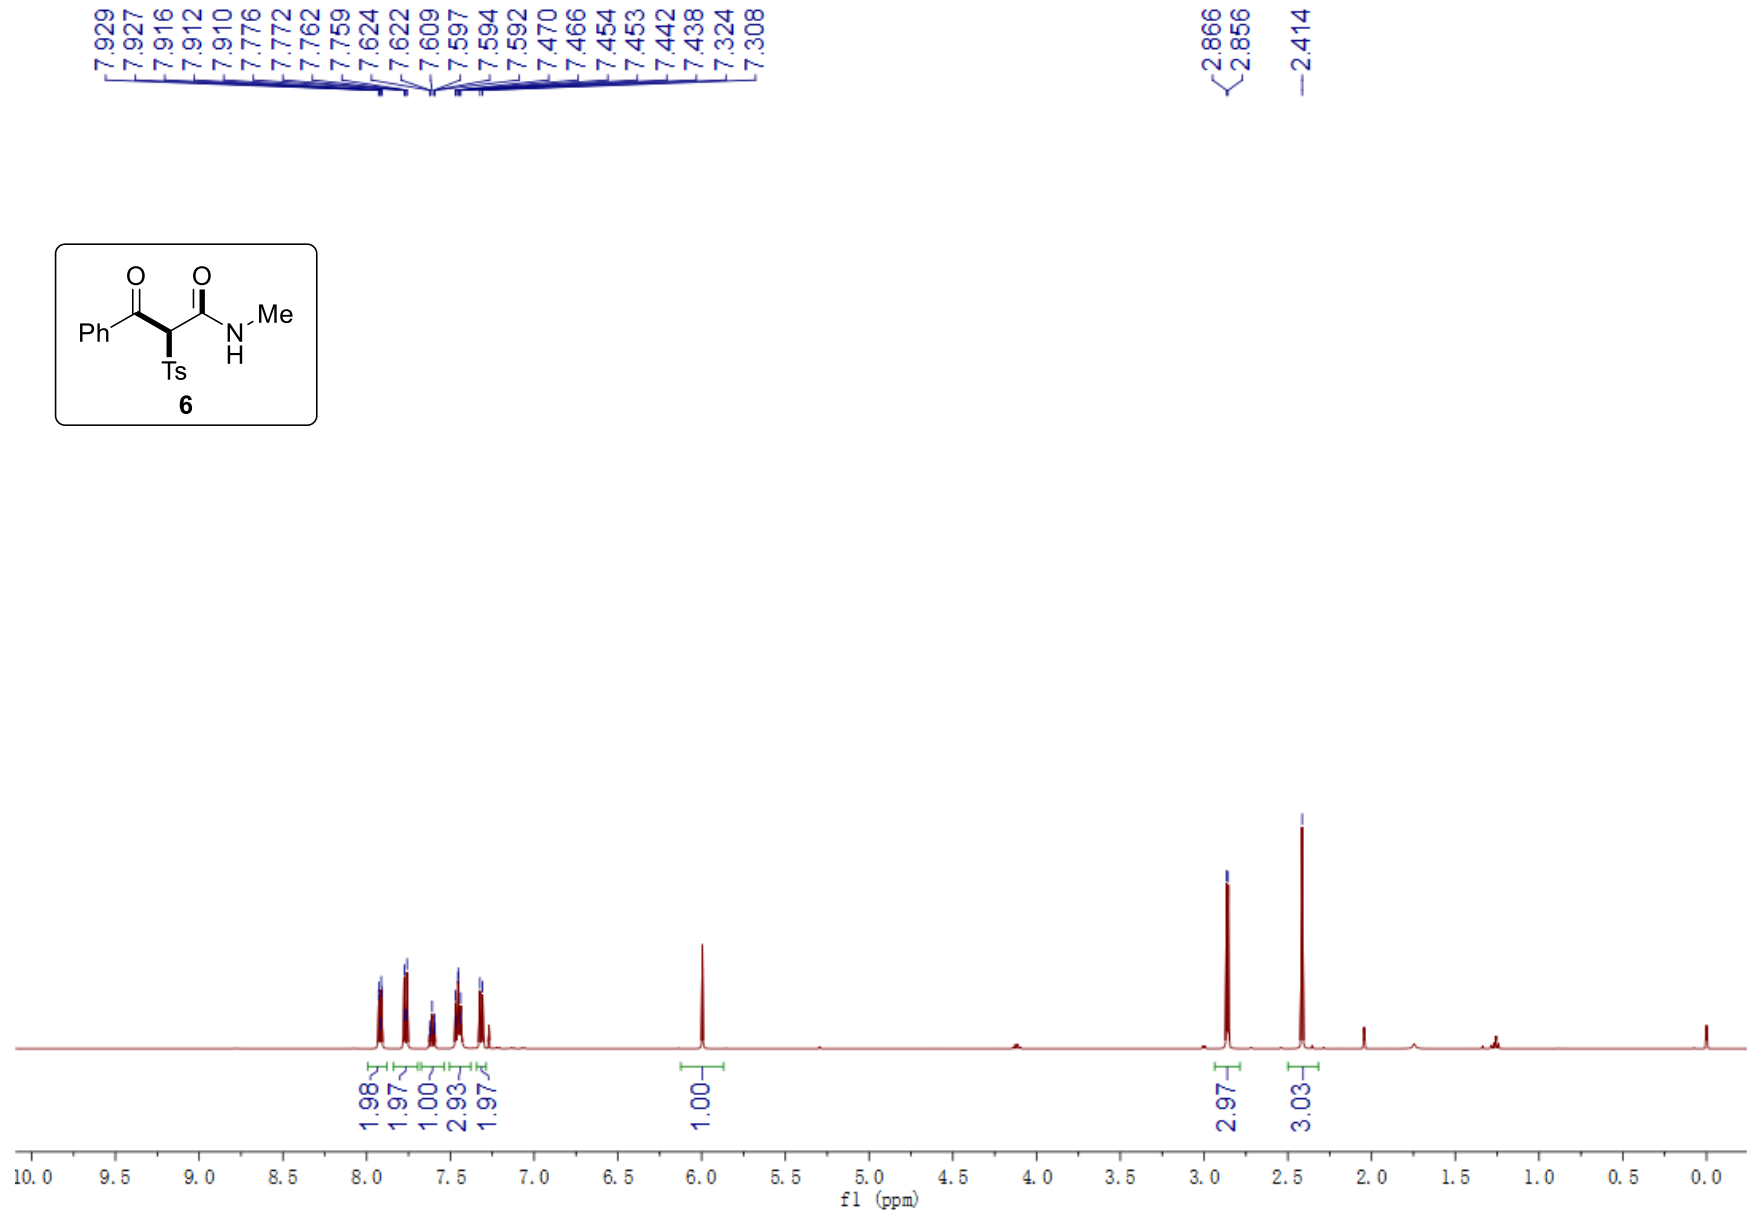

S213

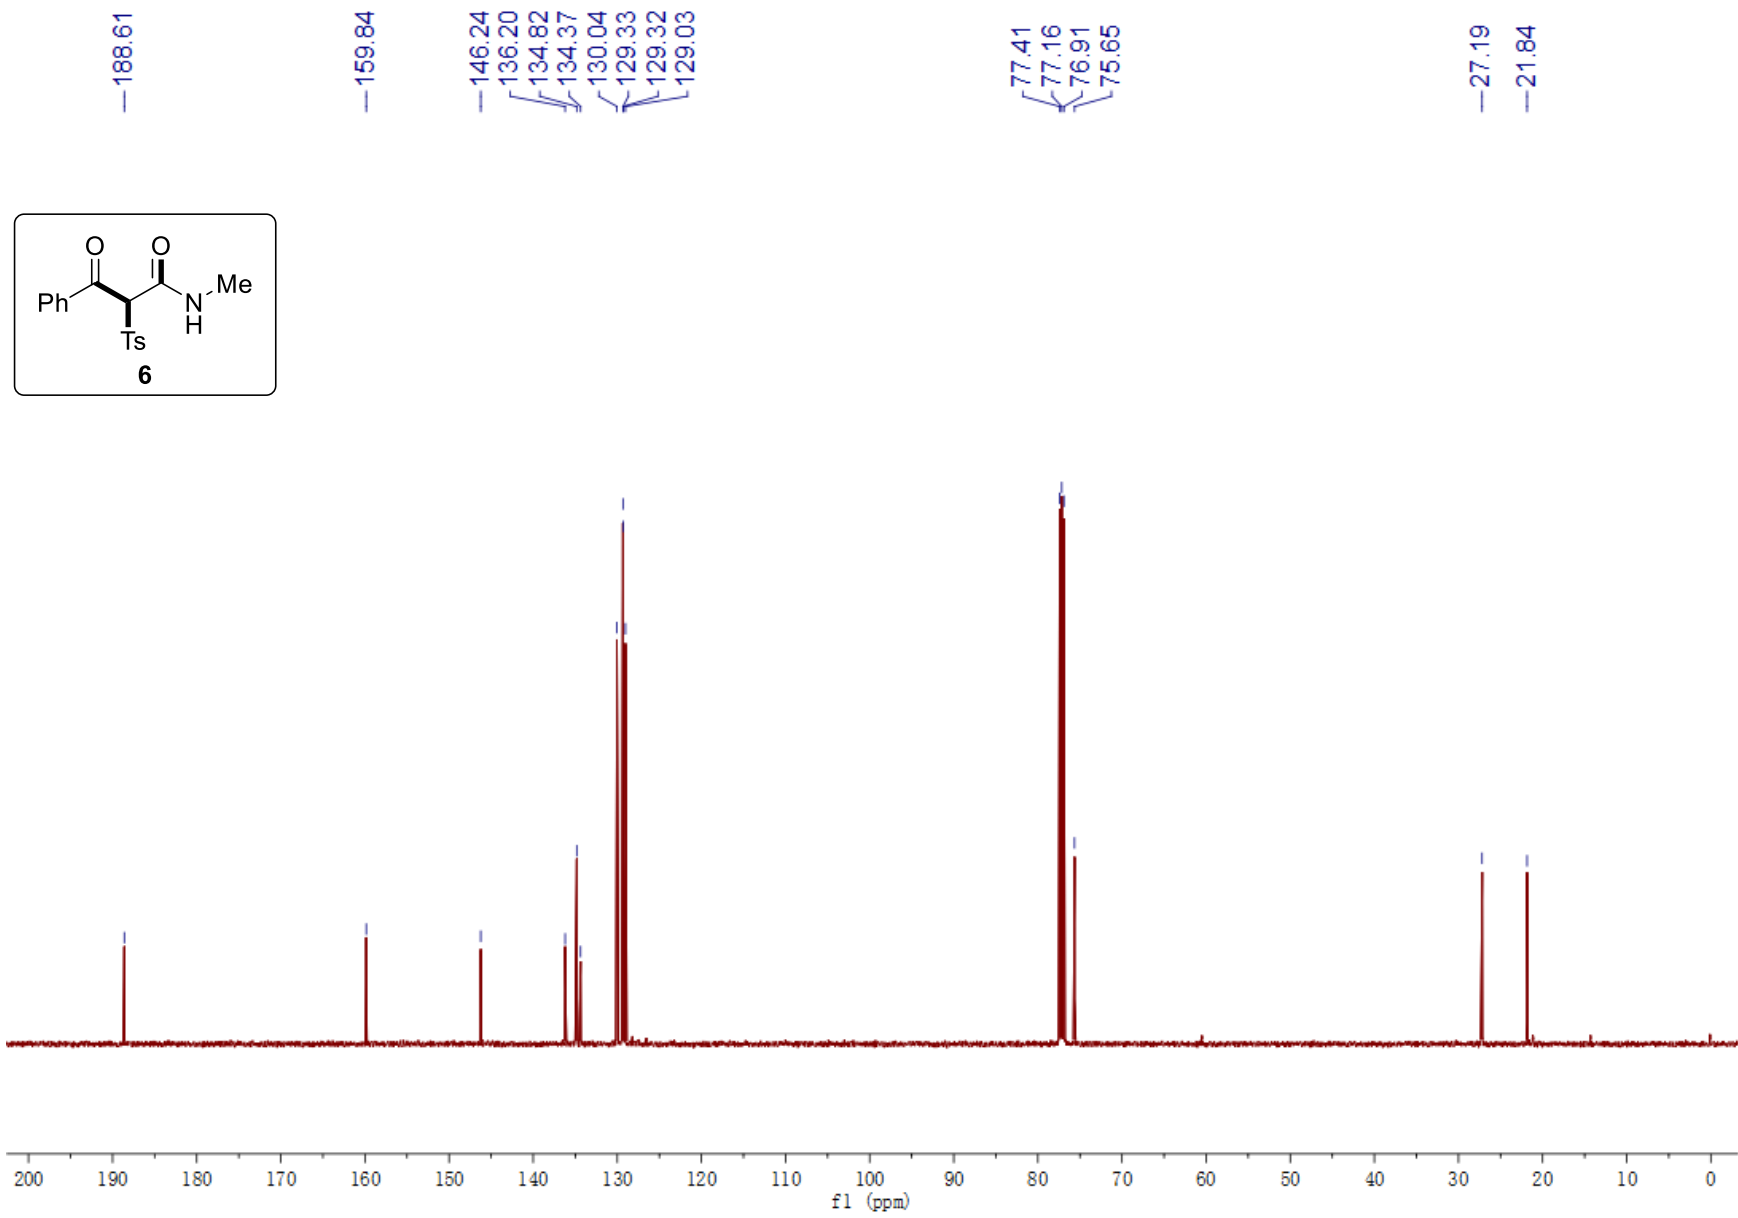

S214

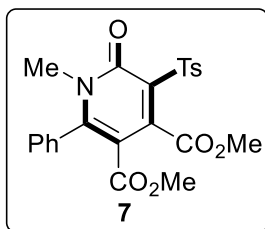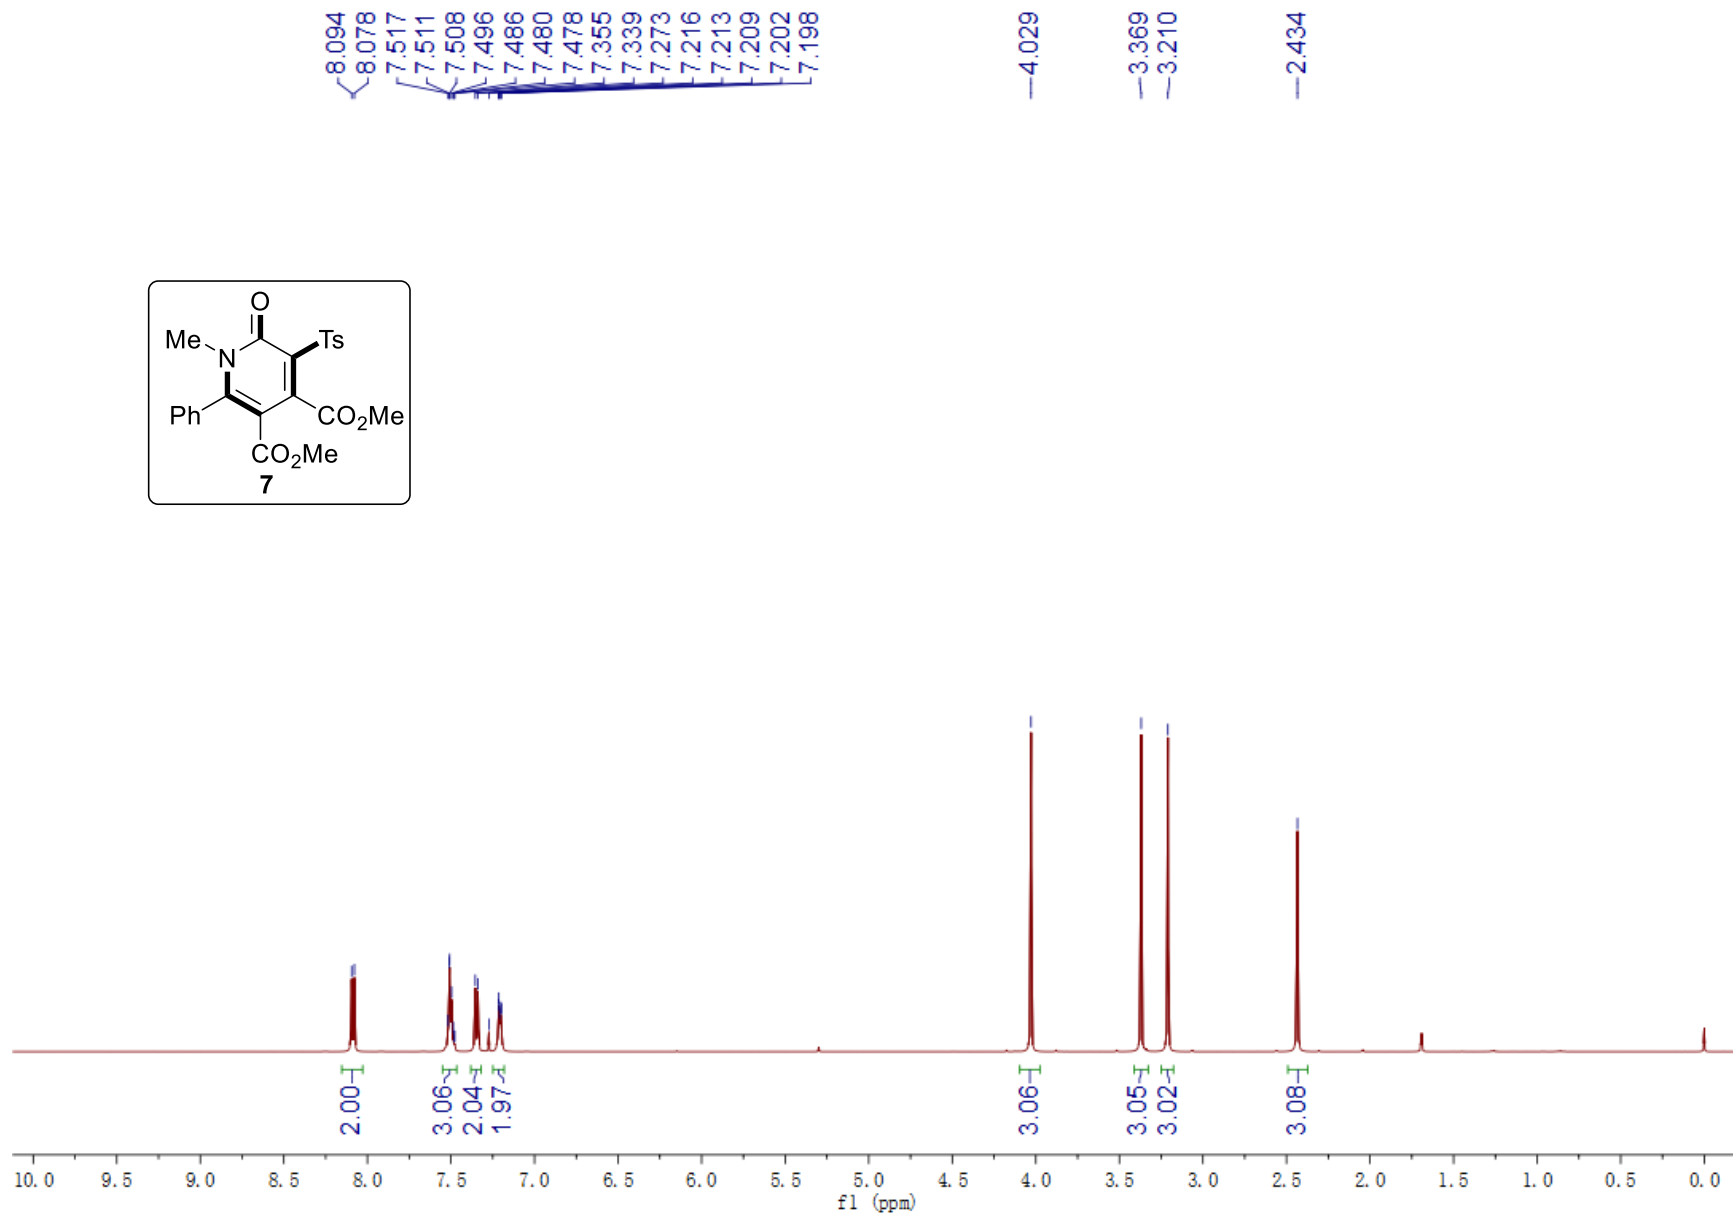

S215

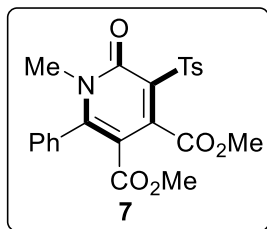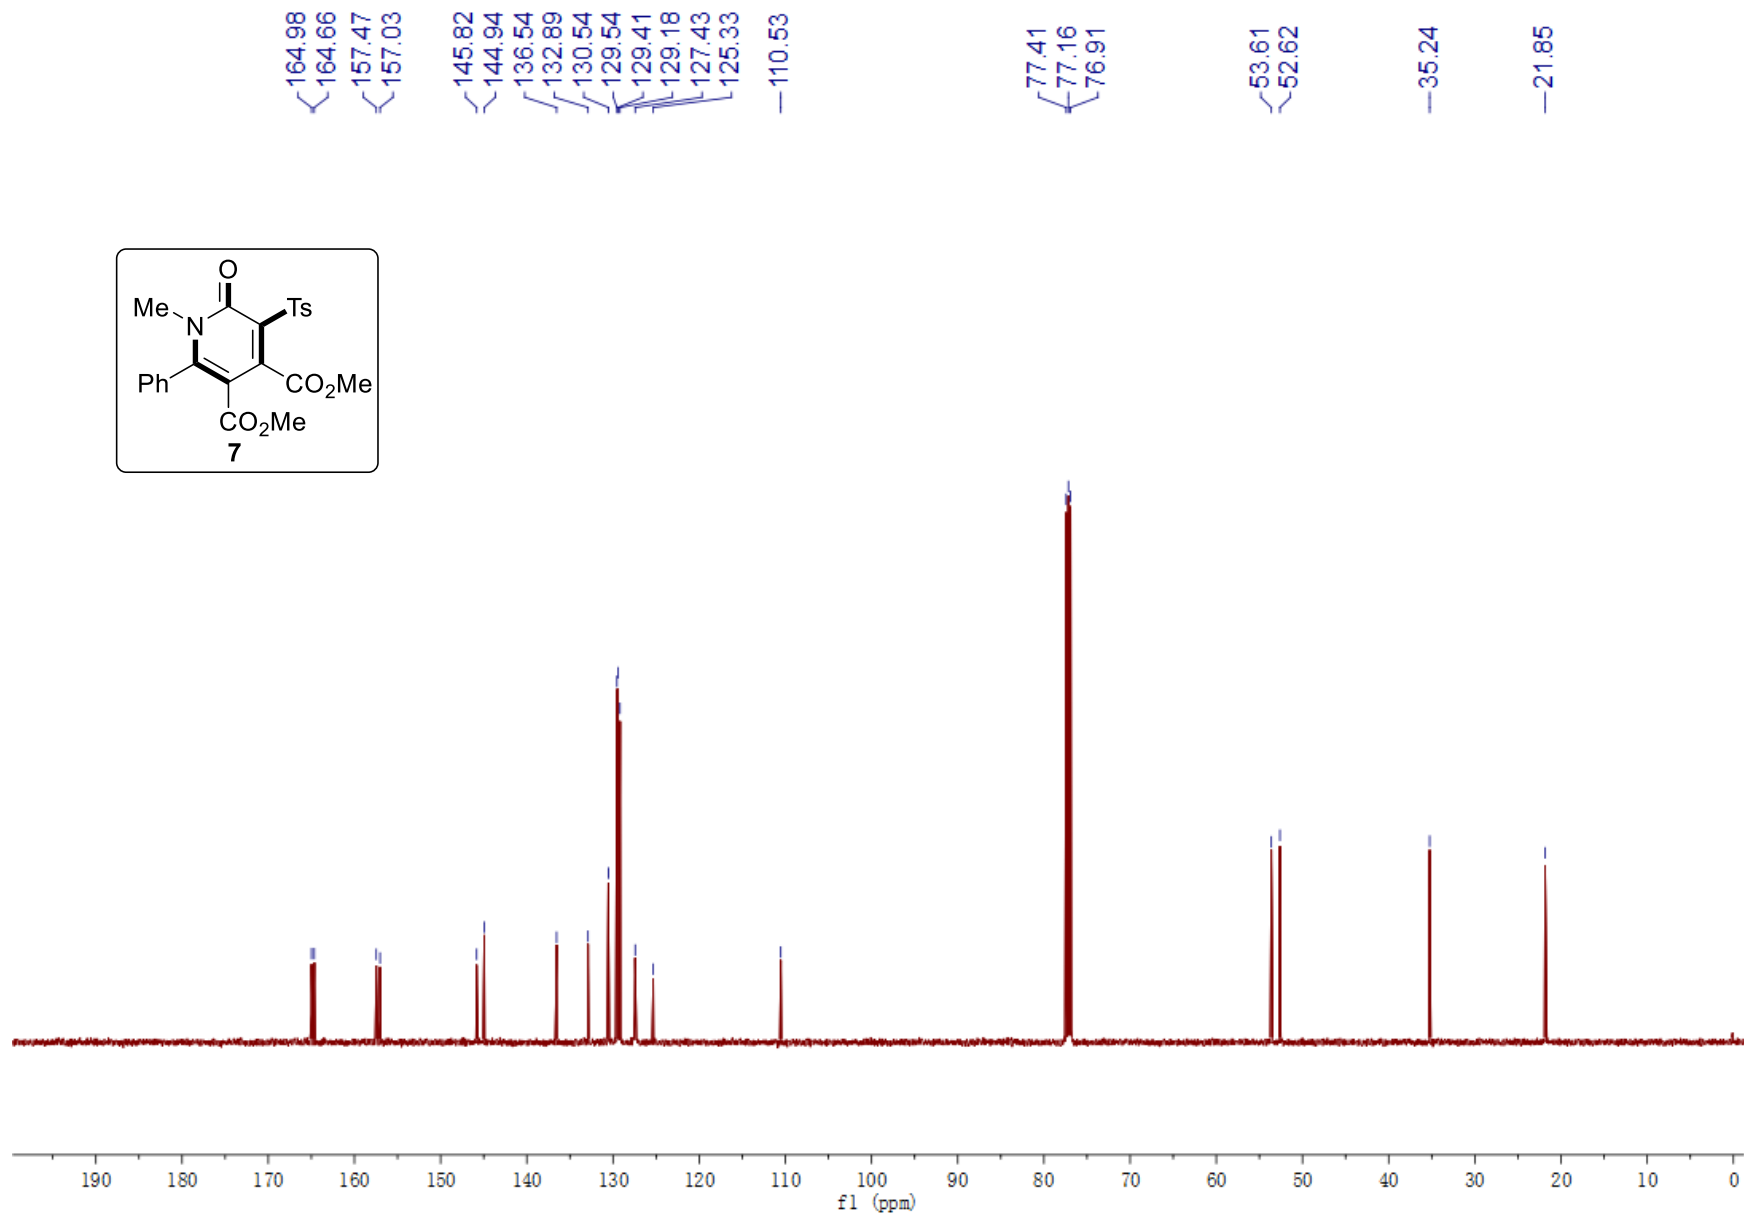

S216



## 12. References

1. Gottlieb, H. E.; Kotlyar, V.; Nudelman, A. *J. Org. Chem.* **1997**, *62*, 7512.
2. Park, H.-S.; Fan, Z.-L.; Zhu, R. -Y.; Yu, J.-Q. *Angew. Chem., Int. Edit.* **2020**, *59*, 12853.
3. Mansfield, S. J.; Campbell, C. D.; Jones, M. W.; Anderson, E. A. *Chem. Commun.* **2015**, *51*, 3316.
4. Witulski, B.; Gossmann, M. *Chem. Commun.* **1999**, 1879.
5. Clavier, H.; Lepronier, A.; Bengobesse-Mintsa, N.; Gatineau, D.; Pellissier, H.; Giordano, L.; Tenaglia, A.; Buono, G. *Adv. Synth. Catal.* **2013**, *35*, 403.
6. Singh, A.; Teegardin, K.; Kelly, M.; Prasad, K. S.; Krishnan, S.; Weaver, J. D. *J. Organomet. Chem.* **2015**, *776*, 51.
7. D. C. Harris, *Quantitative Chemical Analysis*, Freeman, 9th edn, **2015**.
8. Cismesia, M. A.; Yoon, T. P. *Chem. Sci.* **2015**, *6*, 6019.
9. Monalti, M., et. al. *Handbook of Photochemistry*, 3rd Ed; Taylor & Francis Group, LLC. Boca Raton, FL, **2006**, 601.
10. Sheldrick, G. M. *Acta Crystallographica Section A: Foundations of Crystallography* **2008**, *64*, 112-122.
11. Dolomanov, O. V.; Bourhis, L. J.; Gildea, R. J.; Howard, J. A.; Puschmann, H. *J. Appl. Crystallogra.* **2009**, *42*, 339- 341.
